# Supplementary material for: Dynamic proteomic and phosphoproteomic atlas of corticostriatal axons in neurodevelopment
Source: eLife journal article supplement (doi:10.7554/elife.78847), 2022-10-14

Figure 2 - figure supplement 1a

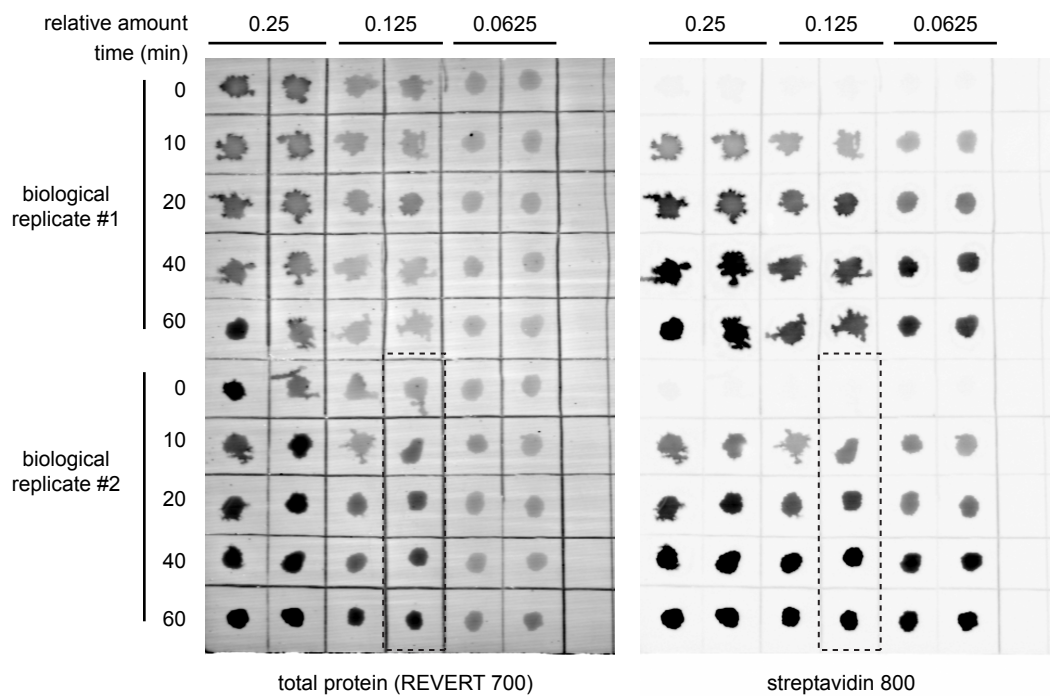

each sample was dotted twice (technical replicate for averaging) next to each other

Figure 2 - figure supplement 1b

Replicate 1

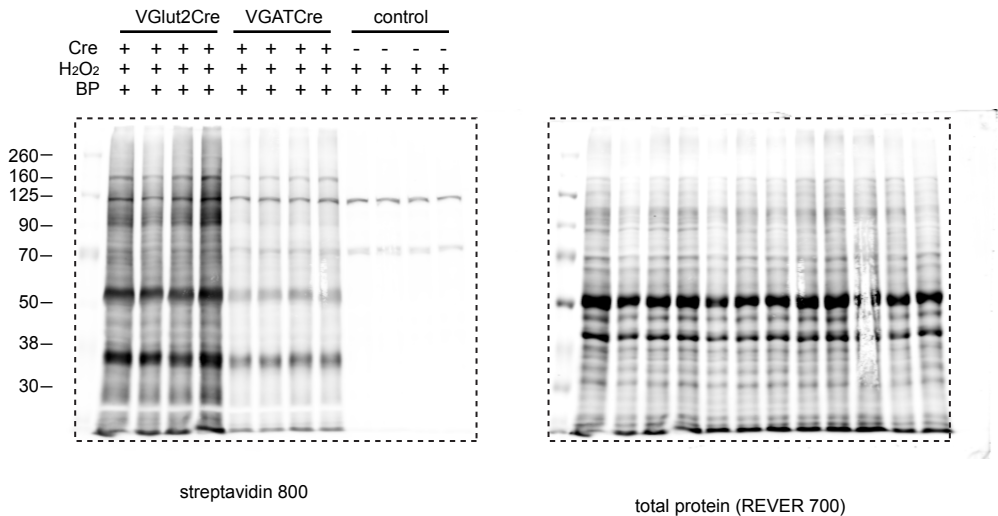

Supplement: fig2-figsupp1-data1 [file elife-78847-fig2-figsupp1-data1-v2.zip]
