# Supplementary material for: Dynamic proteomic and phosphoproteomic atlas of corticostriatal axons in neurodevelopment
Source: eLife. 2022 Oct 14;11:e78847. doi: 10.7554/eLife.78847 (PMC9629834; doi:10.7554/eLife.78847)
Supplement: Supplementary file 1. [file elife-78847-supp1.xlsx]

## Sheet: Table1_genotyping
Primers and PCR protocol for APEX reporter line genotyping.
Primer name	Sequence (5’ -> 3’)
Q5 amplification of the APEX transgene
R26R2	TCTGTGGGAAGTCTTGTCCCTCC
R26F1(AAG)	CCAAAGTCGCTCTGAGTTGTTATCAGTAAG
	1x Q5 reaction buffer
	0.5µM forward and reverse primers
	200µM mixed dNTPs
	0.02 U/µl Q5 polymerase
	1M Betaine (PCR additives from Sigma)
	1µL heat-inactivated crude lysate (in DirectPCR Lysis solution)
	Nuclease-free water up to 25µL
	Thermocycling parameters (optimized using gradient PCR):
	98oC 2min
	98oC 30sec | x 30 cycles
	63oC 30sec |
	72oC 3min |
	72oC 10min
	4oC hold
	317bp for WT
	4156bp for APEX-positive mutant
Q5 amplification of HA-R integration site
R26F5	GAAGTTATGTTCTGAGACCATTCTCAGTGGC
APEX-N4	ACAGCGATGTCAAGACCGTTGTTAGC
	1x Q5 reaction buffer
	0.5µM forward and reverse primers
	200µM mixed dNTPs
	0.02 U/µl Q5 polymerase
	0.5µL heat-inactivated crude lysate (in DirectPCR Lysis solution)
	Nuclease-free water up to 25µL
	Thermocycling parameters (optimized using gradient PCR):
	98oC 2min
	98oC 30sec | x 40 cycles
	63oC 30sec |
	72oC 3min |
	72oC 5min
	4oC hold
	Expected 5409bp
Q5 amplification of HA-L integration site
R26R5	AGCCTCGGCTAGGTAGGGGATCG
EGFP-C	CATGGTCCTGCTGGAGTTCGTG
	1x Q5 reaction buffer
	0.5µM forward and reverse primers
	200µM mixed dNTPs
	0.02 U/µl Q5 polymerase
	1M Betaine (PCR additives from Sigma)
	0.5µL heat-inactivated crude lysate (in DirectPCR Lysis solution)
	Nuclease-free water up to 25µL
	Thermocycling parameters (optimized using gradient PCR):
	98oC 2min
	98oC 30sec | x 40 cycles
	72.5oC 30sec |
	72oC 2min |
	72oC 5min
	4oC hold
	Expected 2586bp
GoTaq Green PCR for APEX transgene
R26R3	TCATACTGTAGTAAGGATCTCAAGCAGG
APEX-N4	ACAGCGATGTCAAGACCGTTGTTAGC
	1x GoTaq Green master mix (Promega)
	0.1µM forward and reverse primers
	1µL heat-inactivated crude lysate (in DirectPCR Lysis solution)
	Nuclease-free water up to 25µL
	Thermocycling parameters (optimized using gradient PCR):
	95oC 2min
	95oC 30sec | x 35 cycles
	62oC 1min |
	72oC 1:40min |
	72oC 5min
	4oC hold
	Expected 1249bp
