# Supplementary material for: Dynamic proteomic and phosphoproteomic atlas of corticostriatal axons in neurodevelopment
Source: eLife. 2022 Oct 14;11:e78847. doi: 10.7554/eLife.78847 (PMC9629834; doi:10.7554/eLife.78847)
Supplement: Supplementary file 2. [file elife-78847-supp2.xlsx]

## Sheet: Sheet1
All off-target PCR was performed using the same protocol.
GoTaq Green PCR for potential off-targets
	1x GoTaq Green master mix (Promega)
	0.5µM forward and reverse primers
	1µL heat-inactivated crude lysate (in DirectPCR Lysis solution)
	Nuclease-free water up to 50µL
	Thermocycling parameters (optimized using gradient PCR):
	95oC 5min
	95oC 30sec | x 30 cycles
	55oC 30sec |
	72oC 1min |
	72oC 5min
	4oC hold
Off-target	Sequence/	Score	Chr	Forward primer	PCR product (bp)
	PAM (mismatches)			Reverse primer
1	ATGCCAGTCATTCTAGAAGA/	2.6	chr3	gtggacgacagacatgttgatcc	576
	TGG (3)			cacaaccaaagccgtccttgaag
2	ACCCAATTCTTTCTAGAAGA/	1.69	chr16	agtgcacactagcactgggatg	894
	AGG (3)			gaatgtcatgtgagcatgcatggtg
3	ACTATAGTTTTTCTAGAAGA/	1.58	chr9	gggataagcagcagttatctcagg	558
	TGG (3)			ggcattcagtggtccagataccac
4	TCTGCTGTCTTTCTAGAAGA/	1.56	chr14	ttaggtgggagtgtaggtcagctg	675
	TGG (3)			ctgaatagccatcagctcctgaacc
5	GCTCCAGCCTTTCTAGAACA/	1.41	chr9	tttcattagggcgcttgctcagg	698
	TGG (3)			gtgatacagatgtcccactcaagactg
6	AGAACATTCTTTCTAGAAGA/	0.95	chr15	ggatgaatctaccactgctccctctg	818
	AGG (4)			catgcctcatagcaccatgagatcac
7	TGTCCTGGCTTTCTAGAAGA/	0.92	chr5	gtgctgcacttcagagacaccac	794
	TGG (4)			acccatgtttcccaggttaggataac
8	CCACCAGGCTGTCTAGAAGA/	0.91	chr16	gcattcatgtggagatgggatggg	630
	TGG (4)			tctcatagtcgtcagtcacacagcc
