# Supplementary material for: Dynamic proteomic and phosphoproteomic atlas of corticostriatal axons in neurodevelopment
Source: eLife. 2022 Oct 14;11:e78847. doi: 10.7554/eLife.78847 (PMC9629834; doi:10.7554/eLife.78847)
Supplement: Supplementary file 3. [file elife-78847-supp3.xlsx]

## Sheet: study_info
Sample information.
Sample. ID.	Sample name	Sex	Age	Plex/	BioReplicate	TMT Channel
			(days)	Mixture
1	Rbp4Cre APEX+/+ STR group1 (neonate)	M	5	1	P5_1	129C
2	Rbp4Cre APEX+/+ STR group1 (neonate)	M	5	1	P5_2	129N
3	Rbp4Cre APEX+/+ STR group1 (neonate)	M	5	2	P5_3	131N
4	Rbp4Cre APEX+/+ STR group1 (neonate)	F	5	2	P5_4	130N
5	Rbp4Cre APEX+/+ STR group1 (neonate)	F	5	2	P5_5	132N
6	Rbp4Cre APEX+/+ STR group2 (early postnatal)	M	11	1	P11_1	130C
7	Rbp4Cre APEX+/+ STR group2 (early postnatal)	M	11	1	P11_2	133N
8	Rbp4Cre APEX+/+ STR group2 (early postnatal)	F	11	1	P11_3	132N
9	Rbp4Cre APEX+/+ STR group2 (early postnatal)	F	11	2	P11_4	131C
10	Rbp4Cre APEX+/+ STR group2 (early postnatal)	F	11	2	P11_5	133N
11	Rbp4Cre APEX+/+ STR group3 (preweanling)	M	18	1	P18_1	128C
12	Rbp4Cre APEX+/+ STR group3 (preweanling)	M	18	1	P18_2	128N
13	Rbp4Cre APEX+/+ STR group3 (preweanling)	M	20	2	P18_3	127N
14	Rbp4Cre APEX+/+ STR group3 (preweanling)	F	18	2	P18_4	128C
15	Rbp4Cre APEX+/+ STR group3 (preweanling)	F	18	2	P18_5	129C
16	Rbp4Cre APEX+/+ STR group4 (adult)	M	50	1	P50_1	127N
17	Rbp4Cre APEX+/+ STR group4 (adult)	M	50	1	P50_2	131N
18	Rbp4Cre APEX+/+ STR group4 (adult)	M	50	1	P50_3	132C
19	Rbp4Cre APEX+/+ STR group4 (adult)	F	50	2	P50_4	132C
20	Rbp4Cre APEX+/+ STR group4 (adult)	F	50	2	P50_5	133C
21	STR CTRL Cre-negative	M	20	1	STR_negative_1	133C
22	STR CTRL Cre-negative	M	20	1	STR_negative_2	131C
23	STR CTRL Cre-negative	F	20	2	STR_negative_3	126
24	STR CTRL Cre-negative	F	20	2	STR_negative_4	129N
25	Rbp4Cre H2B CTX	M	18	1	CTX_H2B_1	127C
26	Rbp4Cre H2B CTX	M	18	1	CTX_H2B_2	130N
27	Rbp4Cre H2B CTX	M	18	2	CTX_H2B_3	128N
28	CTX CTRL Cre-negative	M	20	1	CTX_negative_1	126
29	CTX CTRL Cre-negative	M	20	2	CTX_negative_2	127C
30	CTX CTRL Cre-negative	F	20	2	CTX_negative_3	130C
31	5x_STR_REF channel (from P18)	NA	NA	1	Norm_1	134N
32	5x_STR_REF channel (from P18)	NA	NA	2	Norm_2	134N

## Sheet: UEvsFT_peptide
Pep	Master.Protein.Accessions	Modifications	X..Missed.Cleavages	Percolator.q.Value..by.Search.Engine...Sequest.HT	Num_DE(residues)	logFC	AveExpr	t	P.Value	adj.P.Val	B	rowID	bin	Phospho
RPPSPDPNTK	Q62261	1xPhospho [S4]; 1xTMTpro_zero [K10]; 1xTMTpro_zero [N-Term]	0	0.0001452	1	-5.79158	23.6255	-17.559	3.71844e-06	0.0129262	4.53337	1	1	TRUE
SPFEIISPPASPPEMTGQR	Q9QYR6	2xPhospho [S7; S11]; 1xOxidation [M15]; 1xTMTpro_zero [N-Term]	0	0.0001793	2	-5.75206	22.4134	-15.2532	8.13645e-06	0.0141422	4.03924	2	1	TRUE
SPSLSPSPPSPIEK	P14873	1xPhospho [S10]; 1xTMTpro_zero [K14]; 1xTMTpro_zero [N-Term]	0	0.0001452	1	-5.26748	22.0339	-14.8607	9.40142e-06	0.0145252	3.94127	3	1	TRUE
ESSPLYSPGFSDSTSAAK	P14873	1xPhospho [S]; 1xTMTpro_zero [K18]; 1xTMTpro_zero [N-Term]	0	3.511e-05	2	-4.52023	21.5342	-18.3553	2.90328e-06	0.0129262	4.67647	4	1	TRUE
VVSSTSEEEEAFTEK	Q4KMM3	1xPhospho [S/T]; 1xTMTpro_zero [K15]; 1xTMTpro_zero [N-Term]	0	0.001056	5	-3.92803	21.6158	-13.5383	1.57404e-05	0.0159302	3.5751	5	1	TRUE
NIVTPRTPPPSQGK	P04370	1xPhospho [T7]; 1xTMTpro_zero [K14]; 1xTMTpro_zero [N-Term]	1	0.0001452	0	-3.61622	21.6707	-18.5229	2.75961e-06	0.0129262	4.70504	6	1	TRUE
NSIEFFEEISDEASK	Q8C8R3	1xTMTpro_zero [K15]; 1xTMTpro_zero [N-Term]	0	0.001043	5	-3.60021	20.5742	-2.01954	0.0927626	0.597236	-4.85296	7	1	FALSE
TEATQGLDYVPSAGTISPTSSLEEDK	Q9QYR6	1xPhospho [S/T]; 1xTMTpro_zero [K26]; 1xTMTpro_zero [N-Term]	0	3.511e-05	5	-3.43186	21.4324	-7.55166	0.000366671	0.0491098	0.852273	8	1	TRUE
WQIGEIASK	Q8C8N2	1xTMTpro_zero [K9]; 1xTMTpro_zero [N-Term]	0	6.323e-05	1	-3.12696	26.8594	-11.313	4.21693e-05	0.0266529	2.8058	9	1	FALSE
LSELNQK	P16546	1xTMTpro_zero [K7]; 1xTMTpro_zero [N-Term]	0	0.0002715	1	-2.84524	25.4675	-3.65662	0.0117545	0.158379	-2.71422	10	1	FALSE
GEPVPAWEGKSPEQEVR	Q9QYR6	1xPhospho [S11]; 1xTMTpro_zero [K10]; 1xTMTpro_zero [N-Term]	1	0.00205	4	-2.80307	21.0041	-6.73971	0.000660143	0.0491098	0.27325	11	1	TRUE
GSAQESLDTISPK	P20357	1xPhospho [S11]; 1xTMTpro_zero [K13]; 1xTMTpro_zero [N-Term]	0	3.511e-05	2	-2.78922	23.1663	-5.02863	0.00281347	0.0686371	-1.20994	12	1	TRUE
NMVPQQALVIR	Q8VDN2; Q6PIC6; Q6PIE5	1xOxidation [M2]; 1xTMTpro_zero [N-Term]	0	3.511e-05	0	-2.58058	26.8191	-13.5019	1.59756e-05	0.0159302	3.56418	13	1	FALSE
SPYLYPLYGLGELPQGFAR	P50396; Q61598	1xTMTpro_zero [N-Term]	0	3.511e-05	1	-2.49885	23.8431	-6.7287	0.000665691	0.0491098	0.264897	14	1	FALSE
IAAEEK	Q06185	1xTMTpro_zero [K6]; 1xTMTpro_zero [N-Term]	0	0.002722	2	-2.46575	25.0145	-1.95247	0.101569	0.622166	-4.94264	15	1	FALSE
FIEDELQIPVK	P46664	1xTMTpro_zero [K11]; 1xTMTpro_zero [N-Term]	0	6.323e-05	3	-2.45417	22.0813	-1.64528	0.153937	0.750389	-5.3446	16	1	FALSE
GDVESIPIMLVGNK	Q5PR73	1xTMTpro_zero [K14]; 1xTMTpro_zero [N-Term]	0	3.511e-05	2	-2.39771	20.0534	-15.9092	6.44019e-06	0.0141422	4.19331	17	1	FALSE
GSVEDIPIMLVGNK	Q91Z61	1xTMTpro_zero [K14]; 1xTMTpro_zero [N-Term]	0	3.511e-05	2	-2.39771	20.0534	-15.9092	6.44019e-06	0.0141422	4.19331	18	1	FALSE
EDEPSVGQVAR	Q6ZPJ3	1xTMTpro_zero [N-Term]	0	0.0007395	3	-2.35962	22.8572	-13.3244	1.71847e-05	0.0159302	3.51017	19	1	FALSE
SAVGSTQLLLSQK	Q6PFD5	1xTMTpro_zero [K13]; 1xTMTpro_zero [N-Term]	0	3.511e-05	0	-2.3582	22.2852	-3.34585	0.0169011	0.205249	-3.0972	20	1	FALSE
GAAAMIPGPQTVATEIR	Q9Z2H5	1xTMTpro_zero [N-Term]	0	0.0001288	1	-2.27895	20.8679	-3.946	0.00849577	0.127887	-2.37141	21	1	FALSE
FINMFAVLDELK	Q7TMB8; Q5SQX6	1xTMTpro_zero [K12]; 1xTMTpro_zero [N-Term]	0	3.511e-05	2	-2.25754	21.1426	-4.32432	0.00566502	0.100935	-1.94396	22	1	FALSE
AIGVLTSGGDAQGMNAAVR	P12382; Q9WUA3	1xTMTpro_zero [N-Term]	0	3.511e-05	1	-2.25676	24.0965	-3.23407	0.0193302	0.224738	-3.23853	23	1	FALSE
DIEAMDPSILK	P46460	1xTMTpro_zero [K11]; 1xTMTpro_zero [N-Term]	0	3.511e-05	3	-2.23783	22.3543	-5.59184	0.00168416	0.0586095	-0.677739	24	1	FALSE
TNDPVESSLR	G5E8K5	1xTMTpro_zero [N-Term]	0	3.511e-05	2	-2.16174	21.9284	-3.72557	0.0108668	0.149904	-2.63131	25	1	FALSE
LPYTEGDAQQLQR	A2ALS5	1xTMTpro_zero [N-Term]	0	3.511e-05	2	-2.15896	23.085	-1.9135	0.107071	0.637339	-4.99451	26	1	FALSE
EMQFLMQK	Q9QYR6	1xTMTpro_zero [K8]; 1xTMTpro_zero [N-Term]	0	0.0003679	1	-2.14513	21.61	-8.70878	0.000172922	0.0491098	1.56629	27	1	FALSE
HMQEALK	Q9QYR6	1xTMTpro_zero [K7]; 1xTMTpro_zero [N-Term]	0	3.511e-05	1	-2.13865	22.8948	-3.70986	0.0110622	0.151697	-2.65013	28	1	FALSE
ETTPVETVSAETK	Q80U49	1xTMTpro_zero [K13]; 1xTMTpro_zero [N-Term]	0	0.0001793	3	-2.12913	24.8244	-1.69702	0.143542	0.727552	-5.27822	29	1	FALSE
IMNTFSVMPSPK	Q7TMM9; Q9CWF2; Q922F4	1xTMTpro_zero [K12]; 1xTMTpro_zero [N-Term]	0	3.511e-05	0	-2.09452	21.696	-8.53759	0.000192168	0.0491098	1.46803	30	1	FALSE
LFVGNLPADITEDEFK	Q8VIJ6	1xTMTpro_zero [K16]; 1xTMTpro_zero [N-Term]	0	6.323e-05	4	-2.09328	21.5971	-1.95991	0.100551	0.61948	-4.93271	31	1	FALSE
NFYFLEMNTR	Q91ZA3	1xTMTpro_zero [N-Term]	0	3.511e-05	1	-2.09294	23.6065	-2.44728	0.0523684	0.431387	-4.2756	32	1	FALSE
CSDATLLSSLLEEMK	O54774	1xCarbamidomethyl [C1]; 1xTMTpro_zero [K15]; 1xTMTpro_zero [N-Term]	0	3.511e-05	3	-2.08319	19.6919	-13.3411	1.70671e-05	0.0159302	3.51528	33	1	FALSE
IVIENAESIDLK	Q6GYP7	1xTMTpro_zero [K12]; 1xTMTpro_zero [N-Term]	0	3.511e-05	3	-2.06695	21.1811	-2.63079	0.0411997	0.366761	-4.02865	34	1	FALSE
TIMHLMINNTK	P39053	1xTMTpro_zero [K11]; 1xTMTpro_zero [N-Term]	0	0.002424	0	-2.06261	21.2996	-3.28354	0.0182105	0.21624	-3.17576	35	1	FALSE
AVMEIMTK	Q62420	1xTMTpro_zero [K8]; 1xTMTpro_zero [N-Term]	0	0.0001793	1	-2.04614	21.0168	-8.20274	0.000237514	0.0491098	1.26873	36	1	FALSE
TTPQYMEGMEQVFEQCQQFEEK	Q61644	1xCarbamidomethyl [C16]; 1xTMTpro_zero [K22]; 1xTMTpro_zero [N-Term]	0	3.511e-05	5	-2.04436	22.363	-3.26588	0.0186018	0.219016	-3.19813	37	1	FALSE
IIDGGAAQK	Q91XM9	1xTMTpro_zero [K9]; 1xTMTpro_zero [N-Term]	0	3.511e-05	1	-2.04388	22.9221	-13.8759	1.3739e-05	0.0159302	3.67423	38	1	FALSE
TGQAAGFSYTDANK	P62897	1xTMTpro_zero [K14]; 1xTMTpro_zero [N-Term]	0	3.511e-05	1	-2.02557	22.1202	-2.81743	0.0324205	0.3168	-3.77996	39	1	FALSE
FNIVEEDTVLYCYEYEK	Q80YA9	1xCarbamidomethyl [C12]; 1xTMTpro_zero [K17]; 1xTMTpro_zero [N-Term]	0	3.511e-05	5	-2.02193	22.1954	-2.70937	0.0372248	0.344385	-3.92358	40	1	FALSE
GPMQLSADAR	Q7TSJ2	1xTMTpro_zero [N-Term]	0	0.0002306	1	-2.01865	22.572	-3.26374	0.0186499	0.219211	-3.20084	41	1	FALSE
IADFGFSNEFTVGNK	Q8VHJ5	1xTMTpro_zero [K15]; 1xTMTpro_zero [N-Term]	0	3.511e-05	2	-2.01653	22.6557	-2.85935	0.0307416	0.30886	-3.72455	42	1	FALSE
SISFIPPDGEFELMR	P84091	1xTMTpro_zero [N-Term]	0	0.0003356	3	-1.99077	21.6388	-11.9431	3.13559e-05	0.0229476	3.0462	43	1	FALSE
ECEDVMDWINDK	P16546	1xCarbamidomethyl [C2]; 1xTMTpro_zero [K12]; 1xTMTpro_zero [N-Term]	0	0.0002306	5	-1.99032	20.5336	-3.53666	0.0134993	0.174937	-2.86028	44	1	FALSE
LHFFMPGFAPLTAR	Q9ERD7; Q922F4	1xTMTpro_zero [N-Term]	0	3.511e-05	0	-1.9613	22.6047	-3.1424	0.0216115	0.242541	-3.35575	45	1	FALSE
VSDFGQMASGMNVDAGK	P20357	1xTMTpro_zero [K17]; 1xTMTpro_zero [N-Term]	0	3.511e-05	2	-1.94707	22.7452	-6.33983	0.000901031	0.0499974	-0.039156	46	1	FALSE
MLSSCCK	O08599	2xCarbamidomethyl [C5; C6]; 1xTMTpro_zero [K7]; 1xTMTpro_zero [N-Term]	0	0.0002209	0	-1.94262	22.8157	-4.12401	0.00700217	0.113479	-2.16735	47	1	FALSE
HQGVMVGMGQK	P63268; P60710	1xTMTpro_zero [K11]; 1xTMTpro_zero [N-Term]	0	3.511e-05	0	-1.92581	24.0925	-6.61182	0.000728003	0.04952	0.175401	48	1	FALSE
LFVLLPEQSPGSYSK	Q8BY87	1xTMTpro_zero [K15]; 1xTMTpro_zero [N-Term]	0	3.511e-05	1	-1.90586	22.4677	-3.31113	0.0176174	0.211557	-3.14091	49	1	FALSE
TPQAANAPDLSDAIVK	A2RSJ4	1xTMTpro_zero [K16]; 1xTMTpro_zero [N-Term]	0	3.511e-05	2	-1.88915	25.7273	-1.90687	0.108036	0.640343	-5.00331	50	1	FALSE
YLGQGLQYGSFTDLR	O88737	1xPhospho [S10]; 1xTMTpro_zero [N-Term]	0	3.511e-05	1	-1.88228	21.2707	-2.4962	0.0491058	0.412691	-4.2096	51	1	TRUE
ALVPAAELLDSGVISHELYQQLQR	Q9QXS1	1xTMTpro_zero [N-Term]	0	3.511e-05	3	-1.85276	22.0449	-5.86467	0.00133126	0.0537294	-0.436201	52	1	FALSE
MGTPYLQK	P39053	1xTMTpro_zero [K8]; 1xTMTpro_zero [N-Term]	0	0.0001288	0	-1.83977	22.3384	-4.19937	0.00646112	0.10801	-2.08254	53	1	FALSE
SLADEAEVHLK	Q60780	1xTMTpro_zero [K11]; 1xTMTpro_zero [N-Term]	0	3.511e-05	3	-1.83966	21.8978	-11.2154	4.42102e-05	0.026728	2.76677	54	1	FALSE
ISVCDEDK	Q7TNF0; P47708	1xCarbamidomethyl [C4]; 1xTMTpro_zero [K8]; 1xTMTpro_zero [N-Term]	0	6.323e-05	3	-1.83952	22.3459	-1.87058	0.11348	0.656109	-5.0514	55	1	FALSE
QTTAPATMSTAASGTTMGLVEQAK	P28652	1xTMTpro_zero [K24]; 1xTMTpro_zero [N-Term]	0	3.511e-05	1	-1.83497	22.6581	-5.56704	0.00172126	0.0586095	-0.700203	56	1	FALSE
MSATFIGNSTAIQELFK	Q7TMM9; P68372; Q9CWF2	1xTMTpro_zero [K17]; 1xTMTpro_zero [N-Term]	0	6.323e-05	1	-1.83475	25.5205	-1.59868	0.163919	0.770372	-5.40378	57	1	FALSE
EIENYPTCYK	Q9CWZ7	1xCarbamidomethyl [C8]; 1xTMTpro_zero [K10]; 1xTMTpro_zero [N-Term]	0	0.0001288	2	-1.82883	23.0634	-1.84464	0.117538	0.668179	-5.08565	58	1	FALSE
DIVEAHYR	P15105	1xTMTpro_zero [N-Term]	0	0.0001288	2	-1.8215	23.6277	-1.67675	0.147531	0.735539	-5.30431	59	1	FALSE
MFQTLIQK	P56379	1xTMTpro_zero [K8]; 1xTMTpro_zero [N-Term]	0	0.0001288	0	-1.80708	21.3622	-8.18742	0.000239872	0.0491098	1.25937	60	1	FALSE
RIDSLMDEIAFLK	P08551	1xTMTpro_zero [K13]; 1xTMTpro_zero [N-Term]	1	3.511e-05	3	-1.78326	24.5281	-3.78003	0.0102185	0.143147	-2.56636	61	1	FALSE
EMQYFMQQWTGTNK	P14873	1xTMTpro_zero [K14]; 1xTMTpro_zero [N-Term]	0	3.511e-05	1	-1.77793	22.3584	-8.83966	0.000159715	0.0491098	1.6398	62	1	FALSE
DDKNTMTDSTILLEDVQK	Q99104	2xTMTpro_zero [K3; K18]; 1xTMTpro_zero [N-Term]	1	6.323e-05	5	-1.77658	21.8627	-5.09984	0.00263099	0.0671263	-1.14005	63	1	FALSE
VVESCQAEVNK	Q3TCJ1	1xCarbamidomethyl [C5]; 1xTMTpro_zero [K11]; 1xTMTpro_zero [N-Term]	0	3.511e-05	2	-1.77473	22.6099	-2.633	0.0410817	0.366605	-4.02569	64	1	FALSE
VTFESPLELSAQGK	Q99NF2	1xTMTpro_zero [K14]; 1xTMTpro_zero [N-Term]	0	3.511e-05	2	-1.7708	22.915	-1.50195	0.186661	0.802144	-5.52458	65	1	FALSE
LITGLTM	P03911	1xTMTpro_zero [N-Term]	0	0.001756	0	-1.76906	19.5162	-10.4813	6.38823e-05	0.0322802	2.4565	66	1	FALSE
KDEWGLAAPISPGPLTPMR	P20357	1xTMTpro_zero [K1]; 1xTMTpro_zero [N-Term]	1	0.0001452	2	-1.75681	23.8159	-6.84289	0.000610699	0.0491098	0.350816	67	1	FALSE
GDLETQTQLEHAR	Q9Z0H8	1xTMTpro_zero [N-Term]	0	3.511e-05	3	-1.74602	21.9245	-12.2379	2.74333e-05	0.0224388	3.15214	68	1	FALSE
MDENEFVAVTSTNAAK	O35098	1xTMTpro_zero [K16]; 1xTMTpro_zero [N-Term]	0	3.511e-05	3	-1.72977	23.7284	-6.42263	0.000843759	0.0499428	0.0271112	69	1	FALSE
MLQTSSVLVSGLR	Q02053	1xTMTpro_zero [N-Term]	0	3.511e-05	0	-1.7286	21.6256	-3.68841	0.0113356	0.154228	-2.6759	70	1	FALSE
VIISAPSADAPMFVMGVNHEK	P16858	1xTMTpro_zero [K21]; 1xTMTpro_zero [N-Term]	0	3.511e-05	2	-1.71626	24.4423	-7.185	0.000474927	0.0491098	0.599511	71	1	FALSE
EMTLDQK	Q9QYR6	1xTMTpro_zero [K7]; 1xTMTpro_zero [N-Term]	0	0.001445	2	-1.71233	22.2281	-5.06684	0.00271382	0.0680969	-1.17234	72	1	FALSE
MNVFDTELK	O55143	1xTMTpro_zero [K9]; 1xTMTpro_zero [N-Term]	0	0.0001288	2	-1.68437	21.2562	-4.03762	0.00768641	0.119254	-2.26573	73	1	FALSE
TGDTGMLPANYVEAI	Q61792	1xTMTpro_zero [N-Term]	0	0.0001288	2	-1.66752	20.7882	-5.71104	0.00151816	0.0553773	-0.570948	74	1	FALSE
QAAEMEELHR	O88737; Q9QYX7	1xTMTpro_zero [N-Term]	0	3.511e-05	3	-1.66229	22.2386	-2.72134	0.0366565	0.34026	-3.90762	75	1	FALSE
MCDPGMTAFEPEALGNLVEGLDFHR	P11798	1xCarbamidomethyl [C2]; 1xTMTpro_zero [N-Term]	0	3.511e-05	5	-1.65393	23.1409	-4.98233	0.00293988	0.0698561	-1.2558	76	1	FALSE
AGQVAYLEK	Q99104	1xTMTpro_zero [K9]; 1xTMTpro_zero [N-Term]	0	0.0001288	1	-1.65265	21.3506	-3.71356	0.0110158	0.151209	-2.64569	77	1	FALSE
FSGATGQMSDLNK	E9Q3L2	1xTMTpro_zero [K13]; 1xTMTpro_zero [N-Term]	0	3.511e-05	1	-1.64843	21.9114	-4.43809	0.00503575	0.0947297	-1.82	78	1	FALSE
FQIQDISVETEDNK	Q62261	1xTMTpro_zero [K14]; 1xTMTpro_zero [N-Term]	0	3.511e-05	4	-1.64688	24.5658	-1.71722	0.139674	0.719569	-5.25214	79	1	FALSE
YELEAFK	Q61081	1xTMTpro_zero [K7]; 1xTMTpro_zero [N-Term]	0	0.002357	2	-1.62055	22.8886	-0.996473	0.359662	0.946655	-6.09046	80	1	FALSE
APSHQGPVEPDPMLSFAPAAALQSRPEPSSGDGASVPEPPR	Q8K0T0	1xTMTpro_zero [N-Term]	0	0.0001288	5	-1.61785	23.4105	-2.36393	0.0584684	0.459796	-4.38823	81	1	FALSE
DMAGLLKPAACTMLVSSLR	Q05920	1xCarbamidomethyl [C11]; 1xTMTpro_zero [K7]; 1xTMTpro_zero [N-Term]	0	0.0002996	1	-1.61692	24.3619	-5.77673	0.00143477	0.0548092	-0.512942	82	1	FALSE
FQMPDQGMTSADDFFQGTK	O08553	1xTMTpro_zero [K19]; 1xTMTpro_zero [N-Term]	0	3.511e-05	3	-1.6106	24.6462	-6.87355	0.000596847	0.0491098	0.373626	83	1	FALSE
LVTSPCCIVTSTYGWTANMER	P07901	2xCarbamidomethyl [C6; C7]; 1xTMTpro_zero [N-Term]	0	0.001043	1	-1.6106	24.6462	-6.87355	0.000596847	0.0491098	0.373626	84	1	FALSE
KIGELEVGQMENISPGQIIDEPIRPVNIPR	Q99104	1xTMTpro_zero [K1]; 1xTMTpro_zero [N-Term]	1	6.323e-05	5	-1.60894	22.0014	-2.35528	0.0591435	0.463058	-4.39993	85	1	FALSE
VWEQIDQMK	Q9JHU4	1xTMTpro_zero [K9]; 1xTMTpro_zero [N-Term]	0	3.511e-05	2	-1.59721	21.7788	-5.16277	0.00248095	0.0650312	-1.07893	86	1	FALSE
SLTLVSQK	Q9QXW9	1xTMTpro_zero [K8]; 1xTMTpro_zero [N-Term]	0	0.0001452	0	-1.58676	23.0539	-3.35374	0.0167429	0.204041	-3.0873	87	1	FALSE
DCVVPYLLR	E9Q3L2	1xCarbamidomethyl [C2]; 1xTMTpro_zero [N-Term]	0	0.001654	1	-1.58609	21.8216	-2.25766	0.0673537	0.500903	-4.53198	88	1	FALSE
HVEVQVFGDHHGNAVYLFER	Q99MR8	1xTMTpro_zero [N-Term]	0	6.323e-05	3	-1.58233	22.5804	-0.976218	0.368783	0.953969	-6.11011	89	1	FALSE
MFTIDPK	P20357	1xTMTpro_zero [K7]; 1xTMTpro_zero [N-Term]	0	0.001254	1	-1.57361	23.3826	-5.40116	0.00199506	0.0616648	-0.852725	90	1	FALSE
IQADDVVPCFVR	Q9Z0J4	1xCarbamidomethyl [C9]; 1xTMTpro_zero [N-Term]	0	0.0004027	2	-1.5688	22.2485	-1.61904	0.159483	0.762557	-5.378	91	1	FALSE
LVPHQMAH	P19536	1xTMTpro_zero [N-Term]	0	0.0002306	0	-1.56795	21.4992	-7.8336	0.000302672	0.0491098	1.0375	92	1	FALSE
LSLDELHR	Q8VDN2	1xTMTpro_zero [N-Term]	0	3.511e-05	2	-1.56705	25.693	-4.35523	0.00548566	0.0990625	-1.91008	93	1	FALSE
SDPSIVLLLQCDMQK	Q8BGZ1	1xCarbamidomethyl [C11]; 1xTMTpro_zero [K15]; 1xTMTpro_zero [N-Term]	0	3.511e-05	2	-1.55182	19.5347	-5.79467	0.00141292	0.0542828	-0.497199	94	1	FALSE
MTVVWDK	P97427	1xTMTpro_zero [K7]; 1xTMTpro_zero [N-Term]	0	0.0007754	1	-1.54879	23.93	-5.87112	0.00132402	0.0537294	-0.43062	95	1	FALSE
DPYTEQTISLFQAMK	Q9QXS1	1xTMTpro_zero [K15]; 1xTMTpro_zero [N-Term]	0	3.511e-05	2	-1.54515	21.3469	-4.32597	0.00565525	0.100935	-1.94214	96	1	FALSE
WSPSQVVDWMK	Q80YA9	1xTMTpro_zero [K11]; 1xTMTpro_zero [N-Term]	0	0.0003189	1	-1.54027	19.4519	-6.23919	0.000976789	0.0512538	-0.120837	97	1	FALSE
VTPLEIEVLEETVQTMDTS	P70195	1xTMTpro_zero [N-Term]	0	0.0001288	5	-1.53217	18.4454	-3.85497	0.00939621	0.135113	-2.47778	98	1	FALSE
VVDLMAYMASK	P16858	1xTMTpro_zero [K11]; 1xTMTpro_zero [N-Term]	0	3.511e-05	1	-1.52349	24.1611	-6.39121	0.000864981	0.0499428	0.00206548	99	1	FALSE
NADMSEEMQQDSVECATQALEK	P63168	1xCarbamidomethyl [C15]; 1xTMTpro_zero [K22]; 1xTMTpro_zero [N-Term]	0	3.511e-05	6	-1.52208	21.1429	-7.52396	0.000373767	0.0491098	0.833659	100	1	FALSE
GISQEQMQEFR	P57780	1xTMTpro_zero [N-Term]	0	3.511e-05	2	-1.51312	23.3528	-7.0977	0.000505917	0.0491098	0.53726	101	1	FALSE
LSMPIECAEVFSK	E9Q401	1xCarbamidomethyl [C7]; 1xTMTpro_zero [K13]; 1xTMTpro_zero [N-Term]	0	0.0006959	2	-1.50479	20.2138	-6.40036	0.000858741	0.0499428	0.009368	102	1	FALSE
AFPNPYADYNK	O89112	1xTMTpro_zero [K11]; 1xTMTpro_zero [N-Term]	0	0.0001288	1	-1.50385	23.3019	-2.79252	0.0334652	0.323216	-3.81297	103	1	FALSE
ADTQAQPQMQGR	O88737	1xTMTpro_zero [N-Term]	0	3.511e-05	1	-1.4996	21.9634	-6.40113	0.000858218	0.0499428	0.00998219	104	1	FALSE
ASACPLCQAELNMGSR	O88737	2xCarbamidomethyl [C4; C7]; 1xTMTpro_zero [N-Term]	0	3.511e-05	1	-1.49026	21.0771	-7.97141	0.000276171	0.0491098	1.12528	105	1	FALSE
NIGAGVMQIAISQDNR	Q8BPN8	1xTMTpro_zero [N-Term]	0	3.511e-05	1	-1.48788	21.9607	-5.82971	0.00137135	0.0541137	-0.466583	106	1	FALSE
ILADPLDQMK	Q8K0T0	1xTMTpro_zero [K10]; 1xTMTpro_zero [N-Term]	0	3.511e-05	2	-1.48298	22.6887	-7.36121	0.000418841	0.0491098	0.722708	107	1	FALSE
MVDVGGQR	O70443; P21278; P21279	1xTMTpro_zero [N-Term]	0	0.001056	1	-1.47915	21.9949	-6.38095	0.000872045	0.0499428	-0.0061404	108	1	FALSE
EPMQTGIK	Q03265	1xTMTpro_zero [K8]; 1xTMTpro_zero [N-Term]	0	0.0001288	1	-1.47513	22.25	-7.02259	0.000534471	0.0491098	0.483042	109	1	FALSE
MLDAEDIVGTARPDEK	Q7TPR4	1xTMTpro_zero [K16]; 1xTMTpro_zero [N-Term]	0	0.000162	5	-1.4646	22.1482	-4.55948	0.00445031	0.0882473	-1.69007	110	1	FALSE
WGTLTDCVVMR	Q8BG05	1xCarbamidomethyl [C7]; 1xTMTpro_zero [N-Term]	0	0.000162	1	-1.46443	21.0916	-4.39948	0.00523997	0.0965376	-1.86184	111	1	FALSE
LPFAAAQIGNSFR	Q9CZD3	1xTMTpro_zero [N-Term]	0	3.511e-05	0	-1.45917	22.1765	-2.41338	0.0547641	0.44119	-4.32139	112	1	FALSE
IVGDLAQFMVQNGLSR	Q05920	1xTMTpro_zero [N-Term]	0	3.511e-05	1	-1.45761	22.8302	-4.43892	0.00503149	0.0947297	-1.81911	113	1	FALSE
MDVGGLSDPYVK	P46097; P46096	1xTMTpro_zero [K12]; 1xTMTpro_zero [N-Term]	0	3.511e-05	2	-1.45618	22.5415	-5.4506	0.00190854	0.0605997	-0.806857	114	1	FALSE
TTTSEELEDMLESGNPAIFASGIIMDSSISK	O35526	1xTMTpro_zero [K31]; 1xTMTpro_zero [N-Term]	0	3.511e-05	6	-1.45201	20.7882	-4.81706	0.00344711	0.0769376	-1.42218	115	1	FALSE
TVPPAVTGVTFLSGGQSEEEASINLNAINK	P05064	1xTMTpro_zero [K30]; 1xTMTpro_zero [N-Term]	0	3.511e-05	3	-1.44923	21.6966	-1.71756	0.139611	0.719569	-5.25171	116	1	FALSE
LLLAGYDDFNCNIWDAMK	P62880	1xCarbamidomethyl [C11]; 1xTMTpro_zero [K18]; 1xTMTpro_zero [N-Term]	0	3.511e-05	3	-1.44071	21.443	-7.93168	0.000283523	0.0491098	1.10016	117	1	FALSE
MTDIMTEGITIVEDINK	O08599	1xTMTpro_zero [K17]; 1xTMTpro_zero [N-Term]	0	3.511e-05	4	-1.44025	22.5059	-5.82965	0.00137142	0.0541137	-0.466638	118	1	FALSE
MIGGLFIYNHK	P84091	1xTMTpro_zero [K11]; 1xTMTpro_zero [N-Term]	0	3.511e-05	0	-1.4369	20.7427	-2.42666	0.0538119	0.439116	-4.30345	119	1	FALSE
IGYPVMIK	Q99MR8	1xTMTpro_zero [K8]; 1xTMTpro_zero [N-Term]	0	6.323e-05	0	-1.43429	22.6883	-5.73827	0.00148294	0.0553773	-0.546832	120	1	FALSE
MPCFPIESK	P20357	1xCarbamidomethyl [C3]; 1xTMTpro_zero [K9]; 1xTMTpro_zero [N-Term]	0	0.0001452	1	-1.43386	23.6014	-8.27841	0.000226265	0.0491098	1.31461	121	1	FALSE
SYLNMDAIMEAIK	Q91ZA3	1xTMTpro_zero [K13]; 1xTMTpro_zero [N-Term]	0	3.511e-05	2	-1.43306	22.2849	-6.84635	0.000609119	0.0491098	0.353393	122	1	FALSE
GLTPTGMLPSGVLSGGK	P63328	1xTMTpro_zero [K17]; 1xTMTpro_zero [N-Term]	0	3.511e-05	0	-1.4317	23.0344	-7.48644	0.000383639	0.0491098	0.808313	123	1	FALSE
MVCDVVSR	P18872	1xCarbamidomethyl [C3]; 1xTMTpro_zero [N-Term]	0	0.0001288	1	-1.43072	24.0965	-7.3822	0.000412688	0.0491098	0.737167	124	1	FALSE
DLTDYLMK	P63268; P60710	1xTMTpro_zero [K8]; 1xTMTpro_zero [N-Term]	0	0.0001288	2	-1.42695	26.0473	-6.29967	0.00093042	0.0503726	-0.0716017	125	1	FALSE
EAAEMGK	P10126; P62631	1xTMTpro_zero [K7]; 1xTMTpro_zero [N-Term]	0	0.0006272	2	-1.42639	23.7321	-6.11591	0.00107984	0.0522895	-0.222644	126	1	FALSE
DLTSWVTEMK	P16546	1xTMTpro_zero [K10]; 1xTMTpro_zero [N-Term]	0	0.0001288	2	-1.4262	22.671	-8.55434	0.000190178	0.0491098	1.47775	127	1	FALSE
EMLQQSK	P07901; P11499	1xTMTpro_zero [K7]; 1xTMTpro_zero [N-Term]	0	0.0003862	1	-1.42363	22.4069	-5.11948	0.00258308	0.0663925	-1.12091	128	1	FALSE
ELTLWINDK	P15508	1xTMTpro_zero [K9]; 1xTMTpro_zero [N-Term]	0	0.0004707	2	-1.42346	20.6722	-1.58876	0.166122	0.775663	-5.41629	129	1	FALSE
CDMEDER	P63011; P62823	1xCarbamidomethyl [C1]; 1xTMTpro_zero [N-Term]	0	0.000767	4	-1.42342	22.9903	-7.21712	0.000464082	0.0491098	0.622212	130	1	FALSE
ADIGVAMGIVGSDVSK	Q8VDN2	1xTMTpro_zero [K16]; 1xTMTpro_zero [N-Term]	0	3.511e-05	2	-1.42096	21.7026	-5.05524	0.00274363	0.0680969	-1.18373	131	1	FALSE
IGAFGYMECSAK	Q9QUI0	1xCarbamidomethyl [C9]; 1xTMTpro_zero [K12]; 1xTMTpro_zero [N-Term]	0	3.511e-05	1	-1.41531	21.2275	-5.75639	0.00146002	0.0552612	-0.530839	132	1	FALSE
MQEDIEMTK	P43006	1xTMTpro_zero [K9]; 1xTMTpro_zero [N-Term]	0	3.511e-05	3	-1.41426	22.7354	-9.28071	0.000123113	0.0475524	1.87777	133	1	FALSE
EFIMAELIQTEK	A2CG49; Q0KL02	1xTMTpro_zero [K12]; 1xTMTpro_zero [N-Term]	0	0.0007754	3	-1.41077	19.1713	-5.49122	0.00184067	0.0596608	-0.769433	134	1	FALSE
VMYGFCSVK	Q9QXS6	1xCarbamidomethyl [C6]; 1xTMTpro_zero [K9]; 1xTMTpro_zero [N-Term]	0	0.0007223	0	-1.40919	21.175	-4.29363	0.00584972	0.10193	-1.97776	135	1	FALSE
VINQILTEMDGMSTK	Q01853	1xTMTpro_zero [K15]; 1xTMTpro_zero [N-Term]	0	3.511e-05	2	-1.40714	21.0822	-8.01881	0.000267687	0.0491098	1.15507	136	1	FALSE
VSAADSTQVDGGTPMVK	Q9Z2H5	1xTMTpro_zero [K17]; 1xTMTpro_zero [N-Term]	0	3.511e-05	2	-1.40617	21.3115	-5.82564	0.00137611	0.0541137	-0.470134	137	1	FALSE
YAGSALQYEDVGTAVQNLQK	Q9CR26	1xTMTpro_zero [K20]; 1xTMTpro_zero [N-Term]	0	3.511e-05	2	-1.40436	23.032	-1.87402	0.112952	0.654865	-5.04685	138	1	FALSE
VLAGDVETHAEMVHGAFQAQR	Q9CYT6	1xTMTpro_zero [N-Term]	0	3.511e-05	3	-1.40005	21.5585	-4.32779	0.00564457	0.100935	-1.94015	139	1	FALSE
QVVSGQAAK	Q7TSJ2	1xTMTpro_zero [K9]; 1xTMTpro_zero [N-Term]	0	0.0001288	0	-1.39846	22.3746	-2.47097	0.0507607	0.4222	-4.24363	140	1	FALSE
KTPSQATSSQAK	Q8CHK3	2xTMTpro_zero [K1; K12]; 1xTMTpro_zero [N-Term]	1	3.511e-05	0	-1.39716	21.8503	-2.2955	0.0640376	0.485309	-4.4808	141	1	FALSE
VTASQLSAPSNK	Q3UU96	1xTMTpro_zero [K12]; 1xTMTpro_zero [N-Term]	0	6.323e-05	0	-1.39337	22.9547	-1.01354	0.352117	0.944738	-6.07368	142	1	FALSE
VDPLETELGVK	O08759	1xTMTpro_zero [K11]; 1xTMTpro_zero [N-Term]	0	3.511e-05	3	-1.39224	25.0062	-9.5245	0.000107118	0.046546	2.00314	143	1	FALSE
KQQEVVQIDQFLK	Q6NS60	2xTMTpro_zero [K1; K13]; 1xTMTpro_zero [N-Term]	1	3.511e-05	2	-1.38816	24.9059	-8.95706	0.000148859	0.0491098	1.7046	144	1	FALSE
WQASSLPADDLCTENAIMLK	Q9JHU4	1xCarbamidomethyl [C12]; 1xTMTpro_zero [K20]; 1xTMTpro_zero [N-Term]	0	3.511e-05	3	-1.38402	21.5491	-5.26962	0.00224809	0.0638917	-0.976504	145	1	FALSE
MVNFLLK	Q8C8R3	1xTMTpro_zero [K7]; 1xTMTpro_zero [N-Term]	0	0.0002996	0	-1.37567	22.1402	-5.45041	0.00190886	0.0605997	-0.80703	146	1	FALSE
IMFEVQDLK	Q9JHU4	1xTMTpro_zero [K9]; 1xTMTpro_zero [N-Term]	0	0.0001288	2	-1.37485	21.7006	-4.70486	0.00384852	0.0810813	-1.53758	147	1	FALSE
AVGDGIVLCK	Q99K51	1xCarbamidomethyl [C9]; 1xTMTpro_zero [K10]; 1xTMTpro_zero [N-Term]	0	0.0002306	1	-1.3736	26.5102	-6.28635	0.00094041	0.050485	-0.0824062	148	1	FALSE
IVEAAENEYQTAISENYQTMSDTTFK	P47754	1xTMTpro_zero [K26]; 1xTMTpro_zero [N-Term]	0	0.0001288	5	-1.36682	21.0234	-3.62865	0.0121377	0.161661	-2.74808	149	1	FALSE
EDMAALEK	P68369; P68368	1xTMTpro_zero [K8]; 1xTMTpro_zero [N-Term]	0	3.511e-05	3	-1.36643	26.111	-3.85034	0.00944485	0.135253	-2.48323	150	1	FALSE
ILMVGLDAAGK	P61750; P61205; P84078; Q8BSL7; P84084	1xTMTpro_zero [K11]; 1xTMTpro_zero [N-Term]	0	3.511e-05	1	-1.36548	23.6959	-5.74393	0.00147573	0.0553101	-0.54183	151	1	FALSE
TLAGAVSDLLK	Q71LX4	1xTMTpro_zero [K11]; 1xTMTpro_zero [N-Term]	0	3.511e-05	1	-1.36544	23.1191	-5.8017	0.00140447	0.0542477	-0.491047	152	1	FALSE
ESVAEVQEMEK	Q8R0S2	1xTMTpro_zero [K11]; 1xTMTpro_zero [N-Term]	0	0.0001288	4	-1.36543	21.38	-7.76249	0.000317495	0.0491098	0.991507	153	1	FALSE
FLLEMGK	Q8BG39	1xTMTpro_zero [K7]; 1xTMTpro_zero [N-Term]	0	0.001411	1	-1.36529	21.0808	-7.25264	0.000452424	0.0491098	0.647187	154	1	FALSE
AMEWISAK	Q9WUA3	1xTMTpro_zero [K8]; 1xTMTpro_zero [N-Term]	0	0.0002306	1	-1.36204	22.1925	-5.66397	0.00158135	0.0569654	-0.61288	155	1	FALSE
EANELQQWITEK	P16546	1xTMTpro_zero [K12]; 1xTMTpro_zero [N-Term]	0	3.511e-05	3	-1.35947	25.8543	-1.66287	0.150324	0.740267	-5.32211	156	1	FALSE
FQILEGPPESMGR	P50396	1xTMTpro_zero [N-Term]	0	3.511e-05	2	-1.35908	22.1763	-5.53413	0.00177197	0.0592288	-0.730157	157	1	FALSE
SVSMLDLQGDGPGGR	F6SEU4	1xTMTpro_zero [N-Term]	0	6.323e-05	2	-1.3575	20.867	-4.00921	0.00792769	0.121137	-2.29835	158	1	FALSE
SFNDDAMLIEK	Q99MR8	1xTMTpro_zero [K11]; 1xTMTpro_zero [N-Term]	0	3.511e-05	3	-1.35614	21.8765	-5.92398	0.00126631	0.0537294	-0.385035	159	1	FALSE
AGTHILCIK	Q05920	1xCarbamidomethyl [C7]; 1xTMTpro_zero [K9]; 1xTMTpro_zero [N-Term]	0	3.511e-05	0	-1.35527	27.1511	-7.84719	0.00029993	0.0491098	1.04624	160	1	FALSE
ADDPTMGEGPDK	O08599	1xTMTpro_zero [K12]; 1xTMTpro_zero [N-Term]	0	3.511e-05	4	-1.35395	23.3217	-4.27981	0.00593512	0.102903	-1.99303	161	1	FALSE
VLSYAPGPLDNDMQQLAR	Q64105	1xTMTpro_zero [N-Term]	0	3.511e-05	2	-1.35243	19.8724	-4.03066	0.00774481	0.119657	-2.27372	162	1	FALSE
MLQVASQASR	P97765	1xTMTpro_zero [N-Term]	0	0.0001288	0	-1.34895	22.0836	-4.52866	0.00459125	0.0899174	-1.72283	163	1	FALSE
GYGFGMVK	Q60931	1xTMTpro_zero [K8]; 1xTMTpro_zero [N-Term]	0	0.0001288	0	-1.34775	21.8764	-7.28603	0.000441774	0.0491098	0.670542	164	1	FALSE
DTEQVDNWMSK	P16546	1xTMTpro_zero [K11]; 1xTMTpro_zero [N-Term]	0	6.323e-05	3	-1.34774	23.2078	-5.65563	0.00159286	0.0570843	-0.620342	165	1	FALSE
FVGDADLER	P30999	1xTMTpro_zero [N-Term]	0	0.0007754	3	-1.34037	22.5565	-1.91177	0.107322	0.638558	-4.9968	166	1	FALSE
AVVDAGITTK	Q9JLB0	1xTMTpro_zero [K10]; 1xTMTpro_zero [N-Term]	0	3.511e-05	1	-1.33446	22.2633	-1.58347	0.16731	0.778078	-5.42296	167	1	FALSE
KLESASASASEGK	Q6P9K8	2xTMTpro_zero [K1; K13]; 1xTMTpro_zero [N-Term]	1	3.511e-05	2	-1.33362	22.7105	-1.51201	0.184163	0.799861	-5.51216	168	1	FALSE
RQEQIQAVPIANCQAAR	Q9QXS1	1xCarbamidomethyl [C13]; 1xTMTpro_zero [N-Term]	1	3.511e-05	1	-1.33075	23.1161	-5.91392	0.00127707	0.0537294	-0.393687	169	1	FALSE
ADGLGGQADLMAER	Q8BG39	1xTMTpro_zero [N-Term]	0	3.511e-05	3	-1.32811	23.8308	-5.56616	0.00172259	0.0586095	-0.701	170	1	FALSE
NAEGSTVTCTGSIR	Q7TME0	1xCarbamidomethyl [C9]; 1xTMTpro_zero [N-Term]	0	0.0001288	1	-1.32769	20.7992	-2.63166	0.0411529	0.366605	-4.02748	171	1	FALSE
GEVQMEFIQLPK	P20357	1xTMTpro_zero [K12]; 1xTMTpro_zero [N-Term]	0	3.511e-05	2	-1.32454	21.6354	-3.21763	0.0197191	0.227169	-3.25947	172	1	FALSE
QFYDQALQQAVMDDDANNAK	P35762	1xTMTpro_zero [K20]; 1xTMTpro_zero [N-Term]	0	3.511e-05	4	-1.32342	20.9992	-5.71358	0.00151484	0.0553773	-0.5687	173	1	FALSE
AISGQLGDMDK	Q9QYX7	1xTMTpro_zero [K11]; 1xTMTpro_zero [N-Term]	0	3.511e-05	2	-1.32174	20.7648	-5.35129	0.00208694	0.0627635	-0.899358	174	1	FALSE
AYGENIGYSEK	P14094	1xTMTpro_zero [K11]; 1xTMTpro_zero [N-Term]	0	3.511e-05	2	-1.31834	24.8375	-1.51309	0.183896	0.799861	-5.51082	175	1	FALSE
AASDIAMTELPPTHPIR	P62259	1xTMTpro_zero [N-Term]	0	0.0001288	2	-1.30984	22.491	-6.80579	0.00062797	0.0491098	0.32306	176	1	FALSE
EMQPTHPIR	P68254; Q9CQV8; P63101	1xTMTpro_zero [N-Term]	0	0.0001452	1	-1.30779	24.5397	-4.11729	0.00705288	0.114168	-2.17497	177	1	FALSE
LAEMPADSGYPAYLGAR	P50516	1xTMTpro_zero [N-Term]	0	6.323e-05	2	-1.30462	22.7355	-4.79899	0.00350839	0.0776819	-1.44063	178	1	FALSE
EVAMTEHK	Q6PIC6	1xTMTpro_zero [K8]; 1xTMTpro_zero [N-Term]	0	0.001099	2	-1.30376	25.714	-2.53005	0.0469753	0.40147	-4.16399	179	1	FALSE
EITALAPSTMK	P63268; P60710	1xTMTpro_zero [K11]; 1xTMTpro_zero [N-Term]	0	3.511e-05	1	-1.30231	26.8271	-6.76283	0.000648674	0.0491098	0.290734	180	1	FALSE
QFASQANMVGPWIQTK	P57780	1xTMTpro_zero [K16]; 1xTMTpro_zero [N-Term]	0	3.511e-05	0	-1.30072	20.5198	-2.68022	0.0386488	0.351709	-3.9625	181	1	FALSE
IHNANPELTDGQIQAMLR	Q5SWU9	1xTMTpro_zero [N-Term]	0	3.511e-05	2	-1.30066	21.4761	-4.05394	0.00755156	0.118702	-2.24705	182	1	FALSE
MSVIWDK	O08553; Q62188	1xTMTpro_zero [K7]; 1xTMTpro_zero [N-Term]	0	0.0003679	1	-1.29967	25.8409	-6.65374	0.000704906	0.0494365	0.207685	183	1	FALSE
SGEGMGIR	Q05920	1xTMTpro_zero [N-Term]	0	0.0001452	1	-1.29797	24.5071	-7.4511	0.00039321	0.0491098	0.784322	184	1	FALSE
QEYALAMIQCK	Q8BVE3	1xCarbamidomethyl [C10]; 1xTMTpro_zero [K11]; 1xTMTpro_zero [N-Term]	0	0.0002209	1	-1.29751	20.2934	-7.92521	0.000284742	0.0491098	1.09605	185	1	FALSE
NSLESYAFNMK	P63017	1xTMTpro_zero [K11]; 1xTMTpro_zero [N-Term]	0	3.511e-05	1	-1.29316	22.6397	-6.82327	0.000619764	0.0491098	0.336156	186	1	FALSE
TIAMDGTEGLVR	P56480	1xTMTpro_zero [N-Term]	0	0.0001288	2	-1.29162	21.2477	-5.28237	0.00222202	0.0638917	-0.964396	187	1	FALSE
NDFMGAMSFGVSELLK	P63318	1xTMTpro_zero [K16]; 1xTMTpro_zero [N-Term]	0	3.511e-05	2	-1.28658	20.3059	-5.27678	0.0022334	0.0638917	-0.9697	188	1	FALSE
QSTEPSIVMPSIGLSAEPPAPK	P20357	1xTMTpro_zero [K22]; 1xTMTpro_zero [N-Term]	0	3.511e-05	2	-1.28353	22.0996	-4.60335	0.00425809	0.0861069	-1.64369	189	1	FALSE
MATDPENIIK	Q62277	1xTMTpro_zero [K10]; 1xTMTpro_zero [N-Term]	0	3.511e-05	2	-1.28311	26.9431	-6.88796	0.000590459	0.0491098	0.384315	190	1	FALSE
MGDHLWIAR	P15105	1xTMTpro_zero [N-Term]	0	0.0001225	1	-1.28263	21.2471	-8.19456	0.00023877	0.0491098	1.26373	191	1	FALSE
EIGGVTESQK	Q9QYX7	1xTMTpro_zero [K10]; 1xTMTpro_zero [N-Term]	0	3.511e-05	2	-1.28247	23.5992	-2.88563	0.0297374	0.302479	-3.68991	192	1	FALSE
VLGESGEMDALR	B1AWN6; A2APX8	1xTMTpro_zero [N-Term]	0	0.0001288	3	-1.28209	21.2164	-7.83926	0.000301525	0.0491098	1.04114	193	1	FALSE
LEQGQAIDDLMPAQK	Q04447	1xTMTpro_zero [K15]; 1xTMTpro_zero [N-Term]	0	3.511e-05	3	-1.28094	26.1054	-5.52071	0.00179312	0.0592677	-0.742405	194	1	FALSE
GMNEALEK	P08551	1xTMTpro_zero [K8]; 1xTMTpro_zero [N-Term]	0	6.323e-05	2	-1.28047	25.0214	-7.65325	0.000341947	0.0491098	0.919906	195	1	FALSE
ESSDQNFDYMFK	P63011	1xTMTpro_zero [K12]; 1xTMTpro_zero [N-Term]	0	3.511e-05	3	-1.28038	23.6745	-5.93685	0.0012527	0.0537294	-0.373996	196	1	FALSE
ALEESNYELEGK	P02535	1xTMTpro_zero [K12]; 1xTMTpro_zero [N-Term]	0	3.511e-05	4	-1.27799	27.1939	-6.85414	0.000605576	0.0491098	0.359195	197	1	FALSE
VIMITGDNK	O55143	1xTMTpro_zero [K9]; 1xTMTpro_zero [N-Term]	0	0.001456	1	-1.27744	20.6906	-7.07647	0.000513805	0.0491098	0.521996	198	1	FALSE
QMEQISQFLK	Q9R1Q8	1xTMTpro_zero [K10]; 1xTMTpro_zero [N-Term]	0	3.511e-05	1	-1.2769	20.3987	-5.48322	0.00185381	0.0598064	-0.776783	199	1	FALSE
QEEVYSELQAR	Q9QXS1	1xTMTpro_zero [N-Term]	0	3.511e-05	3	-1.27615	22.6434	-1.50851	0.185028	0.799861	-5.51648	200	1	FALSE
LQQQFNMHVFK	Q99104	1xTMTpro_zero [K11]; 1xTMTpro_zero [N-Term]	0	0.0001225	0	-1.27551	21.7702	-4.81953	0.00343882	0.0769376	-1.41966	201	1	FALSE
IIPGFMCQGGDFTR	P17742	1xCarbamidomethyl [C7]; 1xTMTpro_zero [N-Term]	0	3.511e-05	1	-1.27523	21.8055	-7.18082	0.00047636	0.0491098	0.596548	202	1	FALSE
TTTITIESEGK	Q09XV5	1xTMTpro_zero [K11]; 1xTMTpro_zero [N-Term]	0	0.002829	2	-1.26781	25.7926	-3.17624	0.0207367	0.236153	-3.31235	203	1	FALSE
EWLCLNCQMQR	O88737; Q9QYX7	2xCarbamidomethyl [C4; C7]; 1xTMTpro_zero [N-Term]	0	0.0001288	1	-1.2656	21.6669	-8.59429	0.000185529	0.0491098	1.50084	204	1	FALSE
LLEMLQSK	Q6PH08; Q99MI1	1xTMTpro_zero [K8]; 1xTMTpro_zero [N-Term]	0	0.001595	1	-1.26479	20.1845	-6.49726	0.000795722	0.0499428	0.0861199	205	1	FALSE
LSAMLEDTENWLYEEGEDQPK	P48722	1xTMTpro_zero [K21]; 1xTMTpro_zero [N-Term]	0	3.511e-05	7	-1.26033	20.298	-6.0051	0.0011833	0.052906	-0.315812	206	1	FALSE
VMVTNVTSLLK	Q71LX4; P26039	1xTMTpro_zero [K11]; 1xTMTpro_zero [N-Term]	0	0.000162	0	-1.25753	19.0453	-4.37473	0.00537581	0.0977735	-1.88878	207	1	FALSE
SEATFQFTVER	Q6A4J8	1xTMTpro_zero [N-Term]	0	0.001434	2	-1.25724	20.0499	-8.79584	0.000164002	0.0491098	1.61534	208	1	FALSE
EMLSSTTYPVVVK	O88935	1xTMTpro_zero [K13]; 1xTMTpro_zero [N-Term]	0	3.511e-05	1	-1.25713	23.9155	-6.36955	0.00087997	0.0499428	-0.0152708	209	1	FALSE
LILEQMQK	Q60864	1xTMTpro_zero [K8]; 1xTMTpro_zero [N-Term]	0	0.003205	1	-1.25512	20.7453	-5.21859	0.00235603	0.0639855	-1.02521	210	1	FALSE
MVRPNQDGTLIASCSNDQTVR	P63005	1xCarbamidomethyl [C14]; 1xTMTpro_zero [N-Term]	0	0.001925	2	-1.25509	20.3277	-4.70715	0.00383981	0.0810813	-1.5352	211	1	FALSE
AFEDEMSGR	Q62261	1xTMTpro_zero [N-Term]	0	3.511e-05	3	-1.25385	23.6398	-5.24698	0.00229525	0.0638917	-0.998062	212	1	FALSE
GMNTLVGYDLVPEPK	P12787	1xTMTpro_zero [K15]; 1xTMTpro_zero [N-Term]	0	3.511e-05	2	-1.2536	21.6929	-5.38804	0.00201878	0.0619061	-0.86496	213	1	FALSE
LAVNMVPFPR	Q7TMM9; Q9D6F9; Q9ERD7; P99024; P68372; Q9CWF2; Q922F4	1xTMTpro_zero [N-Term]	0	3.511e-05	0	-1.25312	26.5105	-6.92798	0.000573135	0.0491098	0.413872	214	1	FALSE
MYGVLPWNAFPGK	P60202	1xTMTpro_zero [K13]; 1xTMTpro_zero [N-Term]	0	3.511e-05	0	-1.25253	25.3076	-6.85712	0.000604225	0.0491098	0.361415	215	1	FALSE
FAEPIGGFQCVFPGC	Q8BVQ5	2xCarbamidomethyl [C10; C15]; 1xTMTpro_zero [N-Term]	0	3.511e-05	1	-1.25215	20.9101	-3.90026	0.00893547	0.13119	-2.42469	216	1	FALSE
IADFGMCK	P68404; P16054; P20444; P28867	1xCarbamidomethyl [C7]; 1xTMTpro_zero [K8]; 1xTMTpro_zero [N-Term]	0	6.323e-05	1	-1.25091	23.063	-6.27511	0.000948937	0.0505554	-0.0915414	217	1	FALSE
AMEAVAAQGK	Q9DBJ1	1xTMTpro_zero [K10]; 1xTMTpro_zero [N-Term]	0	3.511e-05	1	-1.24802	21.7355	-7.39754	0.000408254	0.0491098	0.747711	218	1	FALSE
EHMQPTHPIR	P68510; P61982	1xTMTpro_zero [N-Term]	0	3.511e-05	1	-1.2451	21.853	-4.48225	0.00481322	0.0919337	-1.77246	219	1	FALSE
KKGTVVYGEPITASLGTDGSHYWSK	O08553	3xTMTpro_zero [K1; K2; K25]; 1xTMTpro_zero [N-Term]	2	0.0001288	2	-1.24476	22.8078	-1.40508	0.212396	0.837088	-5.64233	220	1	FALSE
MEPLNNLQVAVK	O35643; Q9DBG3	1xTMTpro_zero [K12]; 1xTMTpro_zero [N-Term]	0	3.511e-05	1	-1.24138	21.7229	-7.69988	0.000331251	0.0491098	0.950612	221	1	FALSE
MSVEEVCR	Q6PIC6	1xCarbamidomethyl [C7]; 1xTMTpro_zero [N-Term]	0	6.323e-05	2	-1.24112	24.9008	-4.33918	0.00557797	0.10019	-1.92765	222	1	FALSE
AVLVDLEPGTMDSVR	Q9D6F9; P68372	1xTMTpro_zero [N-Term]	0	3.511e-05	3	-1.23857	25.5071	-6.693	0.000684045	0.0494365	0.237729	223	1	FALSE
VLAVNQENEQLMEDYEK	Q7TPR4	1xTMTpro_zero [K17]; 1xTMTpro_zero [N-Term]	0	3.511e-05	5	-1.23837	22.484	-5.05068	0.00275547	0.0680969	-1.18822	224	1	FALSE
VLLFQTQSPEEMQGWINK	Q2PFD7	1xTMTpro_zero [K18]; 1xTMTpro_zero [N-Term]	0	3.511e-05	2	-1.23732	22.8268	-6.68773	0.000686803	0.0494365	0.233707	225	1	FALSE
ELGDDCNFGPALGEVGEAMR	Q62420	1xCarbamidomethyl [C6]; 1xTMTpro_zero [N-Term]	0	3.511e-05	5	-1.23556	22.7922	-5.52666	0.0017837	0.0592677	-0.736972	226	1	FALSE
DWFIEMPTESK	P20357	1xTMTpro_zero [K11]; 1xTMTpro_zero [N-Term]	0	3.511e-05	3	-1.23508	23.2157	-4.77203	0.00360218	0.0784259	-1.46825	227	1	FALSE
YMLSVDNLK	P39053	1xTMTpro_zero [K9]; 1xTMTpro_zero [N-Term]	0	3.511e-05	1	-1.23165	23.1751	-7.38207	0.000412725	0.0491098	0.737077	228	1	FALSE
KLEALLQGGEVEEVILQAEK	Q9CPP6	2xTMTpro_zero [K1; K20]; 1xTMTpro_zero [N-Term]	1	3.511e-05	5	-1.23163	20.8628	-3.69254	0.0112824	0.154117	-2.67094	229	1	FALSE
ALDTMNFDVIK	P29341	1xTMTpro_zero [K11]; 1xTMTpro_zero [N-Term]	0	0.0001225	2	-1.23135	20.4269	-5.32045	0.00214618	0.063361	-0.928372	230	1	FALSE
IESADACLILANK	Q08460	1xCarbamidomethyl [C7]; 1xTMTpro_zero [K13]; 1xTMTpro_zero [N-Term]	0	3.511e-05	2	-1.23101	20.9938	-1.81716	0.121997	0.679375	-5.12181	231	1	FALSE
DGMAFNALIHK	Q62261	1xTMTpro_zero [K11]; 1xTMTpro_zero [N-Term]	0	3.511e-05	1	-1.231	22.944	-6.44116	0.000831527	0.0499428	0.0418242	232	1	FALSE
TQTAIASEDMPNTLTEAEK	Q62261	1xTMTpro_zero [K19]; 1xTMTpro_zero [N-Term]	0	3.511e-05	4	-1.23037	23.6557	-6.61097	0.000728481	0.04952	0.174744	233	1	FALSE
ATTHEVMGPK	Q61548	1xTMTpro_zero [K10]; 1xTMTpro_zero [N-Term]	0	3.511e-05	1	-1.23035	23.5628	-4.19072	0.00652073	0.108328	-2.09222	234	1	FALSE
MAPYQGPDAAPGALDYK	P57780	1xTMTpro_zero [K17]; 1xTMTpro_zero [N-Term]	0	3.511e-05	2	-1.22897	22.2326	-6.36989	0.000879734	0.0499428	-0.0150002	235	1	FALSE
VVDLMAYMASKE	P16858	1xTMTpro_zero [K11]; 1xTMTpro_zero [N-Term]	1	0.0001288	2	-1.22868	22.7602	-6.9316	0.000571597	0.0491098	0.416537	236	1	FALSE
EDGSIIIVPATQTAIVQLLQGEHMLR	Q920I9	1xTMTpro_zero [N-Term]	0	3.511e-05	3	-1.22847	21.1031	-2.57703	0.0441805	0.383717	-4.10079	237	1	FALSE
SPVPVSGQK	Q80U28	1xTMTpro_zero [K9]; 1xTMTpro_zero [N-Term]	0	3.511e-05	0	-1.22837	22.5554	-1.77791	0.128658	0.692869	-5.17323	238	1	FALSE
IMEYYEK	P50518	1xTMTpro_zero [K7]; 1xTMTpro_zero [N-Term]	0	0.001384	2	-1.22781	20.9451	-8.01591	0.000268196	0.0491098	1.15326	239	1	FALSE
KAMEAVAAQGK	Q9DBJ1	2xTMTpro_zero [K1; K11]; 1xTMTpro_zero [N-Term]	1	3.511e-05	1	-1.22749	21.7519	-4.08275	0.00731999	0.116859	-2.21419	240	1	FALSE
LQEQIYDDPMQK	Q9QYX7	1xTMTpro_zero [K12]; 1xTMTpro_zero [N-Term]	0	3.511e-05	3	-1.22376	21.5832	-5.29641	0.0021937	0.0638917	-0.951087	241	1	FALSE
LQTAPVPMPDLK	P10637	1xTMTpro_zero [K12]; 1xTMTpro_zero [N-Term]	0	0.0001288	1	-1.22127	23.4494	-6.67212	0.000695048	0.0494365	0.221776	242	1	FALSE
NVLCSACSGQGGK	Q9QYJ0	2xCarbamidomethyl [C4; C7]; 1xTMTpro_zero [K13]; 1xTMTpro_zero [N-Term]	0	0.0008394	0	-1.21885	22.8465	-1.23032	0.267209	0.888962	-5.84484	243	1	FALSE
DPYSGNTISLFQAMK	Q9QXS1	1xTMTpro_zero [K15]; 1xTMTpro_zero [N-Term]	0	3.511e-05	1	-1.21866	21.2492	-5.75125	0.00146648	0.0552612	-0.535373	244	1	FALSE
DLSQMLK	O08599	1xTMTpro_zero [K7]; 1xTMTpro_zero [N-Term]	0	0.0008863	1	-1.21859	24.6921	-6.40359	0.00085655	0.0499428	0.0119441	245	1	FALSE
LYQEMFAWK	Q9JHU4	1xTMTpro_zero [K9]; 1xTMTpro_zero [N-Term]	0	3.511e-05	1	-1.21649	21.3759	-2.45881	0.0515795	0.426658	-4.26004	246	1	FALSE
MLTINPSK	P11798	1xTMTpro_zero [K8]; 1xTMTpro_zero [N-Term]	0	0.000162	0	-1.21633	24.0462	-6.94763	0.000564842	0.0491098	0.428325	247	1	FALSE
AEEDVEPECIMEK	Q62418	1xCarbamidomethyl [C9]; 1xTMTpro_zero [K13]; 1xTMTpro_zero [N-Term]	0	3.511e-05	6	-1.20862	21.1277	-5.16179	0.00248322	0.0650312	-1.07988	248	1	FALSE
DSLLQDGEFTMDLR	P62962	1xTMTpro_zero [N-Term]	0	3.511e-05	4	-1.20727	21.1588	-3.2286	0.0194588	0.225466	-3.2455	249	1	FALSE
MTDIMTEGITIVEDINKR	O08599	1xTMTpro_zero [K17]; 1xTMTpro_zero [N-Term]	1	3.511e-05	4	-1.20433	24.3635	-4.37211	0.0053904	0.097815	-1.89163	250	1	FALSE
AMQGAGTQER	Q07076	1xTMTpro_zero [N-Term]	0	3.511e-05	1	-1.20346	21.2244	-7.75906	0.000318231	0.0491098	0.989278	251	1	FALSE
LDQPMTEIVSR	Q02053	1xTMTpro_zero [N-Term]	0	0.0002306	2	-1.20228	22.3663	-4.18316	0.00657339	0.108684	-2.1007	252	1	FALSE
AILVDLEPGTMDSVR	Q7TMM9; Q9ERD7; P99024; Q9CWF2	1xTMTpro_zero [N-Term]	0	3.511e-05	3	-1.20171	26.6971	-6.17246	0.00103109	0.0521837	-0.175704	253	1	FALSE
NMVPQQALVIR	Q8VDN2; Q6PIC6; Q6PIE5	1xTMTpro_zero [N-Term]	0	6.323e-05	0	-1.20034	24.8627	-6.86984	0.000598502	0.0491098	0.370875	254	1	FALSE
MADEAVCVGPAPTSK	Q91ZA3	1xCarbamidomethyl [C7]; 1xTMTpro_zero [K15]; 1xTMTpro_zero [N-Term]	0	3.511e-05	2	-1.1993	24.113	-5.76446	0.00144994	0.0550858	-0.523731	255	1	FALSE
EAVQLMAEAEK	P28663	1xTMTpro_zero [K11]; 1xTMTpro_zero [N-Term]	0	3.511e-05	3	-1.19654	21.2308	-6.15444	0.00104634	0.0521837	-0.190612	256	1	FALSE
FDLMYAK	Q9JJZ2; Q3UX10; P68369; P68368	1xTMTpro_zero [K7]; 1xTMTpro_zero [N-Term]	0	0.0005402	1	-1.19463	27.4988	-6.73237	0.000663833	0.0491098	0.267686	257	1	FALSE
AVDHINSR	P17183	1xTMTpro_zero [N-Term]	0	0.0001452	1	-1.19367	20.8726	-1.94261	0.102934	0.626429	-4.95578	258	1	FALSE
RPEGFDGLGYR	Q9CQS4	1xTMTpro_zero [N-Term]	0	0.0009105	2	-1.19163	20.6076	-2.72045	0.0366986	0.340423	-3.90881	259	1	FALSE
QMGFPLIYVEAEQVEDDR	Q11011	1xTMTpro_zero [N-Term]	0	3.511e-05	5	-1.19127	19.5947	-6.64956	0.000707171	0.0494365	0.204476	260	1	FALSE
EMASGVNTR	Q9Z1G4	1xTMTpro_zero [N-Term]	0	0.0002861	1	-1.19068	20.9649	-5.59861	0.00167419	0.0586095	-0.671621	261	1	FALSE
RPQSADAYMTR	Q8CGF6	1xTMTpro_zero [N-Term]	0	0.0005565	1	-1.18743	21.2675	-4.98551	0.00293097	0.0698561	-1.25263	262	1	FALSE
GLEMLVLTATPVTPK	Q6NS60	1xTMTpro_zero [K15]; 1xTMTpro_zero [N-Term]	0	3.511e-05	1	-1.18681	19.5946	-4.45924	0.00492771	0.0934786	-1.79719	263	1	FALSE
MSESLDTADPAVTGAK	P63011	1xTMTpro_zero [K16]; 1xTMTpro_zero [N-Term]	0	3.511e-05	3	-1.18668	25.0941	-5.2442	0.00230113	0.0638917	-1.00072	264	1	FALSE
YIIIGDMGVGK	Q91V41	1xTMTpro_zero [K11]; 1xTMTpro_zero [N-Term]	0	6.323e-05	1	-1.18554	19.7697	-8.20905	0.000236552	0.0491098	1.27257	265	1	FALSE
MFASFPTTK	P01942	1xTMTpro_zero [K9]; 1xTMTpro_zero [N-Term]	0	0.0001452	0	-1.18431	23.4197	-7.46964	0.000388154	0.0491098	0.796925	266	1	FALSE
GLYAAFDCTATMK	Q05920	1xCarbamidomethyl [C8]; 1xTMTpro_zero [K13]; 1xTMTpro_zero [N-Term]	0	3.511e-05	1	-1.18385	25.542	-5.55278	0.00174302	0.0587508	-0.713163	267	1	FALSE
AAIDYQK	Q3THS6	1xTMTpro_zero [K7]; 1xTMTpro_zero [N-Term]	0	0.0004175	1	-1.18362	19.9809	-2.18003	0.0747312	0.531771	-4.63691	268	1	FALSE
LCDSGELVAIK	Q9WV60	1xCarbamidomethyl [C2]; 1xTMTpro_zero [K11]; 1xTMTpro_zero [N-Term]	0	3.511e-05	2	-1.18183	21.1048	-1.50174	0.186712	0.802144	-5.52483	269	1	FALSE
MEFPEQEK	P20357	1xTMTpro_zero [K8]; 1xTMTpro_zero [N-Term]	0	0.0001288	3	-1.1799	22.9395	-5.4399	0.00192689	0.0606532	-0.816752	270	1	FALSE
MTDSFTEQADQVTADVGK	Q8BVI4	1xTMTpro_zero [K18]; 1xTMTpro_zero [N-Term]	0	3.511e-05	4	-1.17926	20.7915	-5.32064	0.00214581	0.063361	-0.928194	271	1	FALSE
QTNPSAMEVEEDDPVPEIR	Q01853	1xTMTpro_zero [N-Term]	0	3.511e-05	6	-1.17889	21.1275	-3.94568	0.00849881	0.127887	-2.37179	272	1	FALSE
NQVAMNPTNTVFDAK	P63017	1xTMTpro_zero [K15]; 1xTMTpro_zero [N-Term]	0	3.511e-05	1	-1.1779	23.5667	-5.24603	0.00229727	0.0638917	-0.998972	273	1	FALSE
EIICVPYMAK	Q8C8R3; G5E8K5	1xCarbamidomethyl [C4]; 1xTMTpro_zero [K10]; 1xTMTpro_zero [N-Term]	0	3.511e-05	1	-1.17506	20.9045	-5.51118	0.00180834	0.0592677	-0.751132	274	1	FALSE
NEGVSSVLLGASNAEQLMENIGAIQVLPK	P62482	1xTMTpro_zero [K29]; 1xTMTpro_zero [N-Term]	0	3.511e-05	3	-1.17458	21.3092	-4.92116	0.00311696	0.0725986	-1.31688	275	1	FALSE
IEVPLHSLMAQTQLK	Q61699	1xTMTpro_zero [K15]; 1xTMTpro_zero [N-Term]	0	3.511e-05	1	-1.17329	21.5563	-2.5867	0.0436277	0.380818	-4.0878	276	1	FALSE
SQGGEPTYNVAVGR	Q9JJV2	1xTMTpro_zero [N-Term]	0	3.511e-05	1	-1.17212	24.4085	-1.27745	0.251298	0.874753	-5.79164	277	1	FALSE
RVIISAPSADAPMFVMGVNHEK	P16858	1xTMTpro_zero [K22]; 1xTMTpro_zero [N-Term]	1	3.511e-05	2	-1.17184	23.8426	-6.1267	0.00107033	0.0522895	-0.213652	278	1	FALSE
LQMADQIAR	Q80TJ1	1xTMTpro_zero [N-Term]	0	0.0002306	1	-1.17098	22.4225	-6.71817	0.000671044	0.0491098	0.2569	279	1	FALSE
QLQDIATLADQR	Q9EPL8	1xTMTpro_zero [N-Term]	0	3.511e-05	2	-1.17088	21.3523	-2.24901	0.0681371	0.504766	-4.54368	280	1	FALSE
MTVAHMWFDNQIHEADTTEDQSGTSFDK	Q6PIC6	1xTMTpro_zero [K28]; 1xTMTpro_zero [N-Term]	0	3.511e-05	6	-1.16945	23.9614	-5.70863	0.00152133	0.0553773	-0.573093	281	1	FALSE
MLSAVSQQVQCIQEALR	Q9JHU4	1xCarbamidomethyl [C11]; 1xTMTpro_zero [N-Term]	0	3.511e-05	1	-1.16676	22.0855	-4.26833	0.00600711	0.103363	-2.00574	282	1	FALSE
VNLAMDVGK	P52480	1xTMTpro_zero [K9]; 1xTMTpro_zero [N-Term]	0	3.511e-05	1	-1.164	23.2639	-5.90804	0.00128341	0.0537294	-0.398746	283	1	FALSE
LEIEAETDR	P39053	1xTMTpro_zero [N-Term]	0	3.511e-05	4	-1.16244	25.5743	-5.13096	0.00255554	0.0660804	-1.10975	284	1	FALSE
VFAMSPEEFGK	Q9WV69	1xTMTpro_zero [K11]; 1xTMTpro_zero [N-Term]	0	3.511e-05	2	-1.16235	21.3616	-4.45368	0.00495587	0.093757	-1.80318	285	1	FALSE
TDQPPQAK	Q61316	1xTMTpro_zero [K8]; 1xTMTpro_zero [N-Term]	0	0.001031	1	-1.16189	23.4599	-5.51569	0.00180112	0.0592677	-0.747001	286	1	FALSE
EQHPDMSVTK	Q9WV92; P48193	1xTMTpro_zero [K10]; 1xTMTpro_zero [N-Term]	0	3.511e-05	2	-1.16154	22.2934	-5.31833	0.00215033	0.063361	-0.930377	287	1	FALSE
AAADLMAYCEAHAK	P63213	1xCarbamidomethyl [C9]; 1xTMTpro_zero [K14]; 1xTMTpro_zero [N-Term]	0	3.511e-05	2	-1.16008	22.2326	-4.29787	0.00582378	0.101733	-1.97308	288	1	FALSE
ECEDVMDWINDKEAIVTSEELGQDLEHVEVLQK	P16546	1xCarbamidomethyl [C2]; 2xTMTpro_zero [K12; K33]; 1xTMTpro_zero [N-Term]	1	3.511e-05	11	-1.16002	23.2213	-2.30452	0.0632728	0.482687	-4.4686	289	1	FALSE
VDSGIQPGSDISIYYDPMISK	Q91ZA3	1xTMTpro_zero [K21]; 1xTMTpro_zero [N-Term]	0	3.511e-05	3	-1.15986	24.9176	-6.57696	0.000747875	0.04952	0.148402	290	1	FALSE
EVSMDDHK	Q8VDN2	1xTMTpro_zero [K8]; 1xTMTpro_zero [N-Term]	0	0.0001793	3	-1.14971	23.721	-4.86428	0.00329264	0.0748592	-1.37421	291	1	FALSE
MNEVISLWK	P16546	1xTMTpro_zero [K9]; 1xTMTpro_zero [N-Term]	0	6.323e-05	1	-1.14752	23.464	-6.4412	0.0008315	0.0499428	0.0418567	292	1	FALSE
EIGYPVMIK	Q91ZA3	1xTMTpro_zero [K9]; 1xTMTpro_zero [N-Term]	0	3.511e-05	1	-1.1451	25.0412	-5.94111	0.00124823	0.0537294	-0.370345	293	1	FALSE
EMLTLPTFPVVVK	Q64332	1xTMTpro_zero [K13]; 1xTMTpro_zero [N-Term]	0	3.511e-05	1	-1.14171	22.7065	-5.97767	0.00121064	0.0531701	-0.339121	294	1	FALSE
ISSVQSIVPALEIANAHR	P63038	1xTMTpro_zero [N-Term]	0	3.511e-05	1	-1.13964	21.3888	-1.35121	0.228093	0.857014	-5.70623	295	1	FALSE
DFPELTMEVDGK	P50516	1xTMTpro_zero [K12]; 1xTMTpro_zero [N-Term]	0	6.323e-05	4	-1.13585	21.9352	-6.28162	0.000943985	0.050485	-0.0862455	296	1	FALSE
TELCENVDPNSPAAK	Q68ED2	1xCarbamidomethyl [C4]; 1xPhospho [S11]; 1xTMTpro_zero [K15]; 1xTMTpro_zero [N-Term]	0	0.001108	3	-1.13234	20.1549	-2.07996	0.085499	0.572119	-4.77182	297	1	TRUE
DFSGAGGIGVFSESSSVASK	B1AWN6	1xTMTpro_zero [K20]; 1xTMTpro_zero [N-Term]	0	3.511e-05	2	-1.13207	20.5896	-2.99296	0.0259925	0.276927	-3.54925	298	1	FALSE
EVGEVLCTDPLVSK	Q8BWF0	1xCarbamidomethyl [C7]; 1xTMTpro_zero [K14]; 1xTMTpro_zero [N-Term]	0	3.511e-05	3	-1.13122	21.1933	-2.03274	0.0911238	0.592092	-4.83526	299	1	FALSE
AGTFQAFEQFGQQLLAHGHYASPEIK	P16546	1xTMTpro_zero [K26]; 1xTMTpro_zero [N-Term]	0	0.001331	2	-1.13067	21.3099	-1.51957	0.182305	0.796902	-5.50279	300	1	FALSE
TLTIVDTGIGMTK	P07901; P11499	1xTMTpro_zero [K13]; 1xTMTpro_zero [N-Term]	0	3.511e-05	1	-1.12668	22.5092	-6.03021	0.00115888	0.0527996	-0.294555	301	1	FALSE
SPDTNYLFMGDYVDR	P62715; P63330	1xTMTpro_zero [N-Term]	0	3.511e-05	3	-1.12412	22.5563	-5.19371	0.00241079	0.0647143	-1.04909	302	1	FALSE
IMNTFSVVPSPK	Q9D6F9; Q9ERD7; P99024; P68372	1xTMTpro_zero [K12]; 1xTMTpro_zero [N-Term]	0	3.511e-05	0	-1.12408	26.1882	-5.97905	0.00120925	0.0531701	-0.33795	303	1	FALSE
ELDPTNMTYITNQAAVHFEK	Q60864	1xTMTpro_zero [K20]; 1xTMTpro_zero [N-Term]	0	6.323e-05	3	-1.12077	20.76	-7.91688	0.00028632	0.0491098	1.09076	304	1	FALSE
EPECIHVMR	Q8K0U4	1xCarbamidomethyl [C4]; 1xTMTpro_zero [N-Term]	0	3.511e-05	2	-1.12067	23.2355	-7.2356	0.000457975	0.0491098	0.63522	305	1	FALSE
GILAADESVGSMAK	P05063	1xTMTpro_zero [K14]; 1xTMTpro_zero [N-Term]	0	3.511e-05	2	-1.11979	20.9471	-6.42483	0.000842298	0.0499428	0.0288586	306	1	FALSE
FQAQSLGTTYIYDIPEMFR	Q5SWU9	1xTMTpro_zero [N-Term]	0	3.511e-05	2	-1.1195	20.7042	-4.43443	0.0050547	0.0948029	-1.82396	307	1	FALSE
SPSAQLMEQVAQLK	O08788	1xTMTpro_zero [K14]; 1xTMTpro_zero [N-Term]	0	0.0001288	1	-1.11851	20.0772	-4.39732	0.00525166	0.0965376	-1.86418	308	1	FALSE
FVSEMLQK	Q9R111	1xTMTpro_zero [K8]; 1xTMTpro_zero [N-Term]	0	0.0001288	1	-1.11799	22.6759	-5.32035	0.00214637	0.063361	-0.928467	309	1	FALSE
LAEISDVWEEMK	Q62261	1xTMTpro_zero [K12]; 1xTMTpro_zero [N-Term]	0	3.511e-05	4	-1.11667	24.225	-4.86886	0.0032781	0.0748592	-1.36958	310	1	FALSE
IEPEAMLQSR	Q9Z2H5	1xTMTpro_zero [N-Term]	0	0.00102	2	-1.11527	21.1781	-4.42276	0.0051157	0.095226	-1.83658	311	1	FALSE
KQSTEPSIVMPSIGLSAEPPAPK	P20357	2xTMTpro_zero [K1; K23]; 1xTMTpro_zero [N-Term]	1	6.323e-05	2	-1.113	24.0903	-5.95137	0.00123756	0.0537294	-0.36157	312	1	FALSE
SNCNVAVINVGAPAAGMNAAVR	Q9WUA3	1xCarbamidomethyl [C3]; 1xTMTpro_zero [N-Term]	0	3.511e-05	0	-1.10957	21.6306	-7.32826	0.000428716	0.0491098	0.69992	313	1	FALSE
WTGDNMFFIK	Q4KMM3	1xTMTpro_zero [K10]; 1xTMTpro_zero [N-Term]	0	0.0001288	1	-1.10897	20.0008	-5.2444	0.00230071	0.0638917	-1.00053	314	1	FALSE
VISALAEMDSGPNK	P33173	1xTMTpro_zero [K14]; 1xTMTpro_zero [N-Term]	0	3.511e-05	2	-1.10845	20.9333	-4.34331	0.00555406	0.100038	-1.92313	315	1	FALSE
LVEDMENK	P47757	1xTMTpro_zero [K8]; 1xTMTpro_zero [N-Term]	0	0.0009929	3	-1.10775	21.3777	-5.86305	0.00133309	0.0537294	-0.437608	316	1	FALSE
AYSEALAAFGNGALFVEK	Q05920	1xTMTpro_zero [K18]; 1xTMTpro_zero [N-Term]	0	3.511e-05	2	-1.10517	26.0777	-1.10396	0.314284	0.923588	-5.98164	317	1	FALSE
DSLYVDGDCTMDIR	Q9JJV2	1xCarbamidomethyl [C9]; 1xTMTpro_zero [N-Term]	0	0.0001288	4	-1.10428	21.3099	-3.06716	0.0237065	0.258946	-3.45282	318	1	FALSE
AKEFTNVYIK	P29341	2xTMTpro_zero [K2; K10]; 1xTMTpro_zero [N-Term]	1	0.001729	1	-1.10428	22.5475	-1.49913	0.187366	0.802627	-5.52805	319	1	FALSE
QPIQITMPFTDIGTFETVWQVK	Q5M8N0	1xTMTpro_zero [K22]; 1xTMTpro_zero [N-Term]	0	0.0004175	2	-1.10401	19.651	-6.57755	0.000747534	0.04952	0.148859	320	1	FALSE
DYQELMNTK	Q3TTY5	1xTMTpro_zero [K9]; 1xTMTpro_zero [N-Term]	0	3.511e-05	2	-1.10161	23.7598	-4.36038	0.00545637	0.0986616	-1.90444	321	1	FALSE
HMALDMGNEIDTQNR	P60879	1xTMTpro_zero [N-Term]	0	3.511e-05	3	-1.10087	20.4063	-4.3806	0.00534322	0.0976427	-1.88238	322	1	FALSE
GLPSSASDMSLQTEEQWEAGR	O88737	1xTMTpro_zero [N-Term]	0	3.511e-05	4	-1.09738	22.7648	-6.13841	0.00106013	0.0522732	-0.203914	323	1	FALSE
EELEGLIQEQMK	Q9QYB8	1xTMTpro_zero [K12]; 1xTMTpro_zero [N-Term]	0	3.511e-05	4	-1.09651	21.6158	-6.16244	0.00103953	0.0521837	-0.183988	324	1	FALSE
LDMYVLNPVK	Q9QYR6	1xTMTpro_zero [K10]; 1xTMTpro_zero [N-Term]	0	0.0001288	1	-1.09641	23.4191	-5.50087	0.00182495	0.0594283	-0.760574	325	1	FALSE
VEQDLAMGTDAEGEK	O08599	1xTMTpro_zero [K15]; 1xTMTpro_zero [N-Term]	0	3.511e-05	5	-1.09626	26.0506	-4.97532	0.00295958	0.069988	-1.26277	326	1	FALSE
QDLPNAMNAAEITDK	P61205; P84078; Q8BSL7	1xTMTpro_zero [K15]; 1xTMTpro_zero [N-Term]	0	3.511e-05	3	-1.09592	23.4795	-5.75266	0.00146471	0.0552612	-0.534131	327	1	FALSE
DLQGMEGEK	P20357	1xTMTpro_zero [K9]; 1xTMTpro_zero [N-Term]	0	3.511e-05	3	-1.09565	24.2453	-5.48578	0.0018496	0.0598064	-0.774433	328	1	FALSE
LFGLGASLLTQASTLMSVQPEADTQGQPSPSK	O88737	1xTMTpro_zero [K32]; 1xTMTpro_zero [N-Term]	0	3.511e-05	2	-1.09552	21.5281	-6.95198	0.000563027	0.0491098	0.431514	329	1	FALSE
IMDPNIVGNEHYDVAR	P56480	1xTMTpro_zero [N-Term]	0	3.511e-05	3	-1.09507	22.8028	-5.4441	0.00191967	0.0606532	-0.812868	330	1	FALSE
YPIEHGIITNWDDMEK	P63268	1xTMTpro_zero [K16]; 1xTMTpro_zero [N-Term]	0	0.0002861	4	-1.09455	27.9759	-5.05295	0.00274957	0.0680969	-1.18599	331	1	FALSE
IEEGMDQINK	P60879	1xTMTpro_zero [K10]; 1xTMTpro_zero [N-Term]	0	0.0001288	3	-1.09196	23.4018	-5.56417	0.00172562	0.0586095	-0.702814	332	1	FALSE
LDLMDEGTDAR	P39053; Q8BZ98	1xOxidation [M4]; 1xTMTpro_zero [N-Term]	0	0.0003356	4	-1.08733	23.5889	-1.4776	0.19284	0.81321	-5.5545	333	1	FALSE
GYCEVTTPTLVQTQVEGGATLFK	Q8BP47	1xCarbamidomethyl [C3]; 1xTMTpro_zero [K23]; 1xTMTpro_zero [N-Term]	0	0.0001288	2	-1.08652	20.9424	-4.24753	0.00614015	0.104631	-2.02882	334	1	FALSE
YLSPVSAEGAQGGTIAPMTGTIEK	Q99MR8	1xTMTpro_zero [K24]; 1xTMTpro_zero [N-Term]	0	3.511e-05	2	-1.08577	23.8137	-6.05633	0.00113411	0.0522895	-0.272538	335	1	FALSE
LLPEATTEVEIK	Q9WTU3	1xTMTpro_zero [K12]; 1xTMTpro_zero [N-Term]	0	0.00189	3	-1.0852	20.2553	-2.02753	0.0917675	0.593964	-4.84225	336	1	FALSE
VEVDMEK	P46460	1xTMTpro_zero [K7]; 1xTMTpro_zero [N-Term]	0	0.0004175	3	-1.08262	23.112	-4.63297	0.00413367	0.0845274	-1.61256	337	1	FALSE
DNPLNEGTDAAR	O55100	1xTMTpro_zero [N-Term]	0	3.511e-05	3	-1.07845	26.4774	-2.84658	0.0312428	0.310752	-3.74141	338	1	FALSE
NVEGQDMLYQSLK	O35643; Q9DBG3	1xTMTpro_zero [K13]; 1xTMTpro_zero [N-Term]	0	3.511e-05	2	-1.0782	21.8638	-5.15509	0.00249873	0.0653098	-1.08636	339	1	FALSE
GPGYPQAEALLAEAMLK	Q62420	1xTMTpro_zero [K17]; 1xTMTpro_zero [N-Term]	0	3.511e-05	2	-1.07815	23.6998	-5.47684	0.00186436	0.0598706	-0.78265	340	1	FALSE
AYVEANQMLGDLIK	Q05920	1xTMTpro_zero [K14]; 1xTMTpro_zero [N-Term]	0	3.511e-05	2	-1.07785	26.4579	-6.47024	0.000812743	0.0499428	0.0648285	341	1	FALSE
SALASVIMGLSPILGK	Q76MZ3	1xTMTpro_zero [K16]; 1xTMTpro_zero [N-Term]	0	3.511e-05	0	-1.07749	20.3731	-5.22643	0.00233907	0.0638917	-1.0177	342	1	FALSE
LHPDPFLR	Q8BPN8	1xTMTpro_zero [N-Term]	0	0.0001793	1	-1.07664	23.0208	-1.34505	0.229952	0.85764	-5.71345	343	1	FALSE
LDLMDEGTDAR	P39053; Q8BZ98	1xTMTpro_zero [N-Term]	0	3.511e-05	4	-1.07356	24.0522	-5.49712	0.00183104	0.0594873	-0.764015	344	1	FALSE
MTTFFSHNFNEDR	Q8BPN8	1xTMTpro_zero [N-Term]	0	3.511e-05	2	-1.07173	21.0874	-3.15957	0.0211626	0.238465	-3.33371	345	1	FALSE
MGPSGGEGVEPERR	Q61792	1xTMTpro_zero [N-Term]	1	3.511e-05	3	-1.07126	22.8917	-7.03582	0.000529307	0.0491098	0.492638	346	1	FALSE
VLLTTQGVDMISK	Q9JHU4	1xTMTpro_zero [K13]; 1xTMTpro_zero [N-Term]	0	0.0001452	1	-1.07124	22.2992	-6.8336	0.000614973	0.0491098	0.343878	347	1	FALSE
KANIPIMDTGENPEVPFPR	Q9Z1G4	1xTMTpro_zero [K1]; 1xTMTpro_zero [N-Term]	1	3.511e-05	3	-1.07097	23.1917	-4.92569	0.00310342	0.0725262	-1.31234	348	1	FALSE
QKEESSQSSEEK	Q8C8R3	2xTMTpro_zero [K2; K12]; 1xTMTpro_zero [N-Term]	1	0.0001288	4	-1.07093	22.2537	-1.28129	0.250037	0.874518	-5.78725	349	1	FALSE
NMMAACDPR	Q7TMM9; Q9D6F9; Q9ERD7; P99024; P68372; Q9CWF2; Q922F4	1xCarbamidomethyl [C6]; 1xOxidation [M]; 1xTMTpro_zero [N-Term]	0	3.511e-05	1	-1.07015	25.0761	-3.4922	0.0142178	0.181708	-2.91498	350	1	FALSE
ELDMEPYTVAGVAK	P70398	1xTMTpro_zero [K14]; 1xTMTpro_zero [N-Term]	0	0.0002306	3	-1.06999	20.5757	-6.33279	0.000906101	0.0499974	-0.0448259	351	1	FALSE
ADQELLMYSHDNIICGITSVAFSR	P62880	1xCarbamidomethyl [C15]; 1xTMTpro_zero [N-Term]	0	0.0001288	3	-1.06675	20.1059	-2.35198	0.0594033	0.463999	-4.4044	352	1	FALSE
TEEAWASFQEQSGVLQELQGK	Q9JJB1	1xPhospho [S12]; 1xTMTpro_zero [K21]; 1xTMTpro_zero [N-Term]	0	0.002042	4	-1.06675	20.1059	-2.35198	0.0594033	0.463999	-4.4044	353	1	TRUE
RQDLEDSLQAQQYFADANEAESWMR	P16546	1xTMTpro_zero [N-Term]	1	3.511e-05	6	-1.06663	24.4657	-4.7907	0.00353693	0.0778181	-1.44911	354	1	FALSE
KEELMFFLWAPEQAPLK	Q9R0P5	2xTMTpro_zero [K1; K17]; 1xTMTpro_zero [N-Term]	1	3.511e-05	3	-1.06657	22.5944	-3.58523	0.0127602	0.167704	-2.80087	355	1	FALSE
IHPVSTMVK	P16125	1xTMTpro_zero [K9]; 1xTMTpro_zero [N-Term]	0	0.000162	0	-1.06482	22.0464	-3.47906	0.0144383	0.183012	-2.93121	356	1	FALSE
DLYANTVLSGGTTMYPGIADR	P60710	1xTMTpro_zero [N-Term]	0	3.511e-05	2	-1.06102	25.3194	-5.95405	0.00123478	0.0537294	-0.359277	357	1	FALSE
ESTGAQVQVAGDMLPNSTER	Q61990; P60335; P57722	1xTMTpro_zero [N-Term]	0	3.511e-05	3	-1.06058	22.0392	-5.16749	0.0024701	0.0650312	-1.07437	358	1	FALSE
LESIISGAALMADSSCTR	Q61301	1xCarbamidomethyl [C16]; 1xTMTpro_zero [N-Term]	0	0.0002008	2	-1.06027	19.9675	-4.3712	0.00539547	0.097815	-1.89262	359	1	FALSE
IGNTGGMLDNILASK	Q91V92	1xTMTpro_zero [K15]; 1xTMTpro_zero [N-Term]	0	3.511e-05	1	-1.05953	20.5343	-3.32497	0.017328	0.208611	-3.12347	360	1	FALSE
VALVYGQMNEPPGAR	P56480	1xTMTpro_zero [N-Term]	0	3.511e-05	1	-1.05755	21.1125	-4.10969	0.00711066	0.114703	-2.18357	361	1	FALSE
DSAMIDDTVVIPSHQVSALAK	Q8C8R3	1xTMTpro_zero [K21]; 1xTMTpro_zero [N-Term]	0	3.511e-05	3	-1.05676	22.5271	-3.40147	0.0158202	0.195364	-3.02757	362	1	FALSE
HMLPTVLR	Q76MZ3	1xTMTpro_zero [N-Term]	0	0.0001793	0	-1.05609	20.8832	-3.98044	0.00818078	0.124185	-2.33153	363	1	FALSE
NGPALQEAYVR	Q62418	1xTMTpro_zero [N-Term]	0	6.323e-05	1	-1.05585	23.5892	-4.13114	0.00694887	0.112747	-2.15929	364	1	FALSE
LQEVPHEGPMCDLLWSDPDDR	P62715; P63330	1xCarbamidomethyl [C11]; 1xTMTpro_zero [N-Term]	0	3.511e-05	6	-1.05551	23.9249	-5.0603	0.00273057	0.0680969	-1.17876	365	1	FALSE
NMQNAEEWFK	P08551	1xTMTpro_zero [K10]; 1xTMTpro_zero [N-Term]	0	3.511e-05	2	-1.05537	24.3243	-5.98854	0.00119972	0.0531277	-0.329872	366	1	FALSE
AHCIQQMTSK	Q9Z2Q6	1xCarbamidomethyl [C3]; 1xTMTpro_zero [K10]; 1xTMTpro_zero [N-Term]	0	6.323e-05	0	-1.054	22.4964	-3.63827	0.0120042	0.160963	-2.73641	367	1	FALSE
IVQATTLLTMDK	Q9QZQ1	1xTMTpro_zero [K12]; 1xTMTpro_zero [N-Term]	0	0.0002306	1	-1.05246	19.9968	-4.65488	0.00404427	0.0835596	-1.58962	368	1	FALSE
VFIPHGLIMDR	P00493	1xTMTpro_zero [N-Term]	0	3.511e-05	1	-1.05009	21.2858	-4.67505	0.00396393	0.0825435	-1.56856	369	1	FALSE
APALLEAAR	D3YZI9	1xTMTpro_zero [N-Term]	0	0.002988	1	-1.04948	21.7542	-1.66813	0.149258	0.739376	-5.31536	370	1	FALSE
GAAEMVLQTISASK	E9Q401	1xTMTpro_zero [K14]; 1xTMTpro_zero [N-Term]	0	3.511e-05	1	-1.04812	20.1012	-7.0657	0.00051786	0.0491098	0.514236	371	1	FALSE
RPISADSAIMNPASK	Q68FD5	1xTMTpro_zero [K15]; 1xTMTpro_zero [N-Term]	0	3.511e-05	1	-1.04786	26.6701	-4.91027	0.00314974	0.0730879	-1.32782	372	1	FALSE
TLQIFNIEMK	Q68FD5	1xTMTpro_zero [K10]; 1xTMTpro_zero [N-Term]	0	3.511e-05	1	-1.0468	24.2417	-5.52089	0.00179283	0.0592677	-0.74224	373	1	FALSE
MQAYQDIK	P35803	1xTMTpro_zero [K8]; 1xTMTpro_zero [N-Term]	0	3.511e-05	1	-1.04616	23.3998	-4.56552	0.0044233	0.0881174	-1.68367	374	1	FALSE
LMEVEQDQR	Q3UHL1	1xTMTpro_zero [N-Term]	0	0.0001452	3	-1.04558	21.8116	-5.24532	0.00229876	0.0638917	-0.999648	375	1	FALSE
LMHVAYEEFEK	Q9JHU4	1xTMTpro_zero [K11]; 1xTMTpro_zero [N-Term]	0	3.511e-05	3	-1.04052	21.0381	-4.0366	0.00769499	0.119254	-2.26691	376	1	FALSE
WKPVGMADLVTPEQVK	Q80TZ3	2xTMTpro_zero [K2; K16]; 1xTMTpro_zero [N-Term]	0	3.511e-05	2	-1.03949	23.2579	-4.66136	0.00401826	0.0831457	-1.58285	377	1	FALSE
VAVATLSHEQMIDLLR	Q8C0T5	1xTMTpro_zero [N-Term]	0	3.511e-05	2	-1.03783	20.5463	-4.55445	0.00447298	0.0882473	-1.69541	378	1	FALSE
LNWAFNMYDLDGDGK	P62761	1xTMTpro_zero [K15]; 1xTMTpro_zero [N-Term]	0	3.511e-05	3	-1.033	21.481	-5.80992	0.00139466	0.0542477	-0.483861	379	1	FALSE
MVIPGGIDVHTR	O08553	1xTMTpro_zero [N-Term]	0	3.511e-05	1	-1.03272	26.8109	-5.43926	0.00192799	0.0606532	-0.817344	380	1	FALSE
IVGLDQVTGMTETAFGSAYK	Q61879	1xTMTpro_zero [K20]; 1xTMTpro_zero [N-Term]	0	3.511e-05	2	-1.03263	21.1884	-7.23932	0.000456756	0.0491098	0.637836	381	1	FALSE
AVVNSQEWTLSR	Q3UHD9	1xTMTpro_zero [N-Term]	0	0.0001452	1	-1.03198	23.3292	-2.64903	0.0402379	0.362141	-4.00422	382	1	FALSE
QNADISAMQDTINK	P08551	1xTMTpro_zero [K14]; 1xTMTpro_zero [N-Term]	0	3.511e-05	2	-1.03192	22.5682	-5.17368	0.00245596	0.0650312	-1.0684	383	1	FALSE
GVIDMGNSLIER	P16546	1xTMTpro_zero [N-Term]	0	3.511e-05	2	-1.03088	24.3902	-4.98189	0.0029411	0.0698561	-1.25623	384	1	FALSE
MVQSGGCSANDSR	Q80TJ1	1xCarbamidomethyl [C7]; 1xTMTpro_zero [N-Term]	0	3.511e-05	1	-1.03049	21.3257	-7.05004	0.000523822	0.0491098	0.50293	385	1	FALSE
KMDELGSK	Q60771	2xTMTpro_zero [K1; K8]; 1xTMTpro_zero [N-Term]	1	0.0001452	2	-1.03002	25.9617	-4.98087	0.00294395	0.0698561	-1.25724	386	1	FALSE
AAQLCGAGMAAVVEK	P17710	1xCarbamidomethyl [C5]; 1xTMTpro_zero [K15]; 1xTMTpro_zero [N-Term]	0	3.511e-05	1	-1.02913	22.4996	-5.97618	0.00121215	0.0531701	-0.34039	387	1	FALSE
LQQCCVIFDFMDTLSDLK	Q61151	2xCarbamidomethyl [C4; C5]; 1xTMTpro_zero [K18]; 1xTMTpro_zero [N-Term]	0	0.001254	3	-1.02812	20.0841	-2.08057	0.0854292	0.571927	-4.771	388	1	FALSE
MSESLETDPAITAAK	P62823	1xTMTpro_zero [K15]; 1xTMTpro_zero [N-Term]	0	3.511e-05	3	-1.0268	22.3244	-4.75357	0.00366803	0.0787737	-1.48723	389	1	FALSE
QAMGEQAVALAK	Q91ZA3	1xTMTpro_zero [K12]; 1xTMTpro_zero [N-Term]	0	3.511e-05	1	-1.02679	24.5669	-5.64161	0.00161243	0.0574895	-0.632914	390	1	FALSE
SILTEQLETIPK	P20357	1xTMTpro_zero [K12]; 1xTMTpro_zero [N-Term]	0	3.511e-05	2	-1.02549	26.2699	-1.67504	0.147872	0.736215	-5.30651	391	1	FALSE
LLVSMCQGNR	Q07076	1xCarbamidomethyl [C6]; 1xTMTpro_zero [N-Term]	0	0.001742	0	-1.02329	20.4013	-6.19071	0.0010159	0.0521256	-0.160641	392	1	FALSE
QTDVLQQLSIQMANAK	Q9JHU4	1xTMTpro_zero [K16]; 1xTMTpro_zero [N-Term]	0	3.511e-05	1	-1.0232	21.6778	-4.84091	0.00336809	0.0759438	-1.39791	393	1	FALSE
TFVLEVMGR	P47857; P12382; Q9WUA3	1xTMTpro_zero [N-Term]	0	0.000162	1	-1.02232	22.4136	-6.33431	0.000905007	0.0499974	-0.043605	394	1	FALSE
KLAVNMVPFPR	Q7TMM9; Q9D6F9; Q9ERD7; P99024; P68372; Q9CWF2; Q922F4	1xTMTpro_zero [K1]; 1xTMTpro_zero [N-Term]	1	0.0009427	0	-1.02172	25.8335	-5.29388	0.00219878	0.0638917	-0.953489	395	1	FALSE
MQAHIQDLEEQLDEEEGAR	Q61879	1xTMTpro_zero [N-Term]	0	3.511e-05	7	-1.02137	21.6502	-3.49029	0.0142497	0.181948	-2.91735	396	1	FALSE
YENNVMNIR	P63328; P48453	1xTMTpro_zero [N-Term]	0	0.0001288	1	-1.0211	23.4979	-6.01777	0.0011709	0.0527996	-0.305076	397	1	FALSE
FFQPTEMAAQDFFQR	P17426	1xTMTpro_zero [N-Term]	0	3.511e-05	2	-1.02018	20.8617	-6.38477	0.000869409	0.0499428	-0.00308671	398	1	FALSE
GSDVIIMLVGNK	P61294; P35279	1xTMTpro_zero [K12]; 1xTMTpro_zero [N-Term]	0	3.511e-05	1	-1.01952	22.2467	-4.70537	0.00384656	0.0810813	-1.53704	399	1	FALSE
AAADLMTYCDAHACEDPLITPVPTSENPFR	P63216	2xCarbamidomethyl [C9; C14]; 1xTMTpro_zero [N-Term]	0	0.0006613	5	-1.01929	22.1674	-5.01032	0.00286269	0.0688783	-1.22803	400	1	FALSE
IMESFK	Q8VDN2; Q6PIC6	1xTMTpro_zero [K6]; 1xTMTpro_zero [N-Term]	0	0.001925	1	-1.0192	25.6479	-5.88933	0.0013038	0.0537294	-0.41487	401	1	FALSE
LTGMAFR	P16858	1xTMTpro_zero [N-Term]	0	0.0008969	0	-1.01235	26.0424	-6.54851	0.000764563	0.0499428	0.126256	402	1	FALSE
DIMEDTIEDK	O08599	1xTMTpro_zero [K10]; 1xTMTpro_zero [N-Term]	0	3.511e-05	5	-1.00981	22.5642	-6.53633	0.000771841	0.0499428	0.116742	403	1	FALSE
AKDEQSAVSMLK	Q62261	2xTMTpro_zero [K2; K12]; 1xTMTpro_zero [N-Term]	1	3.511e-05	2	-1.00836	24.447	-5.72526	0.00149965	0.0553773	-0.558346	404	1	FALSE
SGLGLGAASASTSGSGPADSVMR	Q7TSJ2	1xTMTpro_zero [N-Term]	0	3.511e-05	1	-1.00822	21.3177	-3.86041	0.0093395	0.134855	-2.47138	405	1	FALSE
QLQVVPLFGDMQIELAR	Q7TMB8; Q5SQX6	1xTMTpro_zero [N-Term]	0	3.511e-05	2	-1.00485	20.1928	-7.03172	0.0005309	0.0491098	0.489669	406	1	FALSE
IHMGNCAENTAK	Q8QZT1	1xCarbamidomethyl [C6]; 1xTMTpro_zero [K12]; 1xTMTpro_zero [N-Term]	0	3.511e-05	1	-1.00443	20.2894	-5.58264	0.0016978	0.0586095	-0.686059	407	1	FALSE
MESVFNQAIR	Q5SQX6	1xTMTpro_zero [N-Term]	0	0.000162	1	-1.003	21.3425	-3.65681	0.011752	0.158379	-2.71399	408	1	FALSE
MVPVSVQQSLAVFSQR	Q9WU78	1xTMTpro_zero [N-Term]	0	3.511e-05	0	-1.00249	18.9977	-5.56773	0.00172022	0.0586095	-0.699581	409	1	FALSE
DDMIFEDCGNVPSEPK	P14094	1xCarbamidomethyl [C8]; 1xTMTpro_zero [K16]; 1xTMTpro_zero [N-Term]	0	3.511e-05	5	-0.999336	21.6714	-6.97397	0.000553948	0.0491098	0.447622	410	1	FALSE
LVLLNMPGPPR	Q924N4; Q91V14	1xTMTpro_zero [N-Term]	0	0.0001288	0	-0.998842	21.849	-5.09296	0.00264801	0.0673137	-1.14677	411	1	FALSE
ELSVMFIETSAK	P61294	1xTMTpro_zero [K12]; 1xTMTpro_zero [N-Term]	0	3.511e-05	2	-0.998662	20.6634	-2.74862	0.0353962	0.334364	-3.87129	412	1	FALSE
MAATFIGNSTAIQELFK	Q9D6F9	1xTMTpro_zero [K17]; 1xTMTpro_zero [N-Term]	0	3.511e-05	1	-0.998605	24.0763	-5.83187	0.00136884	0.0541137	-0.464707	413	1	FALSE
MLDNLGYR	Q9QYC0; Q9QYB8	1xTMTpro_zero [N-Term]	0	0.0004027	1	-0.998146	23.1939	-6.63376	0.000715807	0.04952	0.192324	414	1	FALSE
MQHLIAR	P52480	1xTMTpro_zero [N-Term]	0	0.001528	0	-0.997908	23.4214	-4.48706	0.00478963	0.0917352	-1.7673	415	1	FALSE
IAVGSDADVVIWDPDKMK	P97427	2xTMTpro_zero [K16; K18]; 1xTMTpro_zero [N-Term]	1	3.511e-05	4	-0.9979	22.2992	-4.05353	0.0075549	0.118702	-2.24752	416	1	FALSE
ELNEMQAQIAEESQIR	P70336	1xTMTpro_zero [N-Term]	0	3.511e-05	4	-0.997071	22.2104	-3.29183	0.01803	0.214463	-3.16528	417	1	FALSE
SSIAEVQSEIER	Q8R0S4; P54285	1xTMTpro_zero [N-Term]	0	3.511e-05	3	-0.996863	23.1631	-4.41807	0.00514047	0.0954925	-1.84166	418	1	FALSE
ISEQFTAMFR	Q7TMM9; Q9D6F9; Q9ERD7; P99024; P68372; Q9CWF2	1xTMTpro_zero [N-Term]	0	0.0001288	1	-0.996818	27.4331	-5.25366	0.00228123	0.0638917	-0.991696	419	1	FALSE
GMEDLIPLVNR	P39053	1xTMTpro_zero [N-Term]	0	3.511e-05	2	-0.996288	24.8691	-6.31774	0.000917058	0.0502035	-0.0569742	420	1	FALSE
HDEAWMILK	Q8BG39; Q69ZS6	1xTMTpro_zero [K9]; 1xTMTpro_zero [N-Term]	0	3.511e-05	2	-0.995189	23.0005	-4.92123	0.00311674	0.0725986	-1.31681	421	1	FALSE
MFSEADACELWIDEK	Q62261	1xCarbamidomethyl [C8]; 1xTMTpro_zero [K15]; 1xTMTpro_zero [N-Term]	0	3.511e-05	5	-0.994705	22.3982	-6.99935	0.000543681	0.0491098	0.466141	422	1	FALSE
LEGAGSATIAEVEMPFYEDK	P20357	1xTMTpro_zero [K20]; 1xTMTpro_zero [N-Term]	0	3.511e-05	5	-0.994583	21.8057	-4.29125	0.0058643	0.102003	-1.98038	423	1	FALSE
EMGEAFAADIPR	P17426	1xTMTpro_zero [N-Term]	0	3.511e-05	3	-0.992655	21.1677	-6.29402	0.000934638	0.0503726	-0.0761774	424	1	FALSE
ELGDDSLPSSQFLDGMNYLR	Q8C8R3	1xTMTpro_zero [N-Term]	0	3.511e-05	4	-0.991813	22.8441	-4.42817	0.00508733	0.0948249	-1.83073	425	1	FALSE
DVMSDETNNEETESPSQEFVNITK	P14873	1xTMTpro_zero [K24]; 1xTMTpro_zero [N-Term]	0	3.511e-05	7	-0.989443	23.2671	-4.54905	0.00449747	0.0884545	-1.70114	426	1	FALSE
AEPVPKPPPETTVPPGTPK	O88737	2xTMTpro_zero [K6; K19]; 1xTMTpro_zero [N-Term]	0	6.323e-05	2	-0.989122	24.7686	-4.05773	0.00752067	0.118702	-2.24273	427	1	FALSE
YMACCLLYR	Q3UX10; P68369; P68368	2xCarbamidomethyl [C4; C5]; 1xTMTpro_zero [N-Term]	0	6.323e-05	0	-0.988751	27.0746	-6.05467	0.00113567	0.0522895	-0.273938	428	1	FALSE
VVQSMTQLVR	Q6ZPJ3	1xTMTpro_zero [N-Term]	0	0.00102	0	-0.987352	21.3483	-5.02858	0.0028136	0.0686371	-1.20999	429	1	FALSE
DSLDMEVK	Q62420	1xTMTpro_zero [K8]; 1xTMTpro_zero [N-Term]	0	6.323e-05	3	-0.986501	21.927	-4.61035	0.0042283	0.0859568	-1.63632	430	1	FALSE
MGHEPGVAK	Q60771	1xTMTpro_zero [K9]; 1xTMTpro_zero [N-Term]	0	6.323e-05	1	-0.986105	24.0587	-5.14812	0.00251498	0.0653661	-1.0931	431	1	FALSE
AHTMTDDVTFWK	Q68FD5	1xTMTpro_zero [K12]; 1xTMTpro_zero [N-Term]	0	3.511e-05	2	-0.985846	25.2026	-4.40645	0.00520242	0.0963245	-1.85427	432	1	FALSE
LASSLTTK	Q9DB77	1xTMTpro_zero [K8]; 1xTMTpro_zero [N-Term]	0	6.323e-05	0	-0.985264	22.6609	-1.86854	0.113793	0.656555	-5.0541	433	1	FALSE
LCNDLMSCVQER	Q61644	2xCarbamidomethyl [C2; C8]; 1xTMTpro_zero [N-Term]	0	3.511e-05	2	-0.984267	23.4509	-6.0747	0.00111704	0.0522895	-0.257104	434	1	FALSE
QVLFSADDR	P05063	1xTMTpro_zero [N-Term]	0	0.000162	2	-0.983155	24.6351	-0.802183	0.454773	0.994371	-6.26655	435	1	FALSE
DLTSVMR	Q62261	1xTMTpro_zero [N-Term]	0	0.0004707	1	-0.982597	24.16	-5.91655	0.00127424	0.0537294	-0.39142	436	1	FALSE
KDIEESSMVK	P08553	2xTMTpro_zero [K1; K10]; 1xTMTpro_zero [N-Term]	1	0.0001288	3	-0.981973	22.5957	-4.43241	0.00506521	0.0948029	-1.82614	437	1	FALSE
DLNSQADSLMTSSAFDTSQVK	P16546	1xTMTpro_zero [K21]; 1xTMTpro_zero [N-Term]	0	3.511e-05	3	-0.981802	23.2754	-5.22419	0.00234389	0.0638917	-1.01984	438	1	FALSE
MWEVLESTTQTK	Q62261	1xTMTpro_zero [K12]; 1xTMTpro_zero [N-Term]	0	3.511e-05	2	-0.979721	23.6232	-5.88232	0.00131155	0.0537294	-0.420931	439	1	FALSE
LIFGDALLMEPLEK	Q9Z1B3	1xTMTpro_zero [K14]; 1xTMTpro_zero [N-Term]	0	3.511e-05	3	-0.978605	21.4242	-6.7634	0.000648393	0.0491098	0.291166	440	1	FALSE
LEMYVLNPVK	P14873	1xTMTpro_zero [K10]; 1xTMTpro_zero [N-Term]	0	3.511e-05	1	-0.978536	23.699	-5.5909	0.00168554	0.0586095	-0.678585	441	1	FALSE
EEELQQTLQQEQNMLDR	Q9QXS1	1xTMTpro_zero [N-Term]	0	3.511e-05	5	-0.976303	21.1551	-4.33812	0.00558412	0.10019	-1.92881	442	1	FALSE
AVADQCPDSACK	Q61301	2xCarbamidomethyl [C6; C11]; 1xTMTpro_zero [K12]; 1xTMTpro_zero [N-Term]	0	3.511e-05	2	-0.975875	22.7622	-1.79431	0.125833	0.686678	-5.15179	443	1	FALSE
ISWAMEDSDLER	Q8K0S0	1xTMTpro_zero [N-Term]	0	3.511e-05	4	-0.975402	21.6703	-5.91061	0.00128063	0.0537294	-0.396535	444	1	FALSE
LIQNNHYAMEDVATR	P16546	1xTMTpro_zero [N-Term]	0	3.511e-05	2	-0.975018	24.2889	-4.86958	0.0032758	0.0748592	-1.36884	445	1	FALSE
FELTCYSLAPQIK	P16460	1xCarbamidomethyl [C5]; 1xTMTpro_zero [K13]; 1xTMTpro_zero [N-Term]	0	6.323e-05	1	-0.974122	20.3311	-2.04908	0.0891353	0.58574	-4.81332	446	1	FALSE
LMDGSEILSLLESAR	Q9WV92	1xTMTpro_zero [N-Term]	0	3.511e-05	3	-0.974068	22.2754	-3.89313	0.00900636	0.131548	-2.43303	447	1	FALSE
TVTAMDVVYALK	P62806	1xTMTpro_zero [K12]; 1xTMTpro_zero [N-Term]	0	3.511e-05	1	-0.972686	23.9274	-5.28097	0.00222487	0.0638917	-0.965726	448	1	FALSE
VAGAVTELIQAAEAMK	Q71LX4	1xTMTpro_zero [K16]; 1xTMTpro_zero [N-Term]	0	3.511e-05	2	-0.970797	19.6439	-5.87528	0.00131937	0.0537294	-0.427015	449	1	FALSE
SEIIPMFSNLASDEQDSVR	Q76MZ3	1xTMTpro_zero [N-Term]	0	3.511e-05	4	-0.969154	21.3345	-6.01468	0.00117392	0.0527996	-0.307695	450	1	FALSE
VCMDLNDTVPEYK	Q9R111	1xCarbamidomethyl [C2]; 1xTMTpro_zero [K13]; 1xTMTpro_zero [N-Term]	0	3.511e-05	3	-0.967416	21.2963	-6.12887	0.00106843	0.0522895	-0.211845	451	1	FALSE
KADIGVAMGIVGSDVSK	Q8VDN2	2xTMTpro_zero [K1; K17]; 1xTMTpro_zero [N-Term]	1	3.511e-05	2	-0.967244	24.3653	-2.89113	0.0295318	0.300949	-3.68267	452	1	FALSE
YFDSFGDLSSASAIMGNAK	P02088	1xTMTpro_zero [K19]; 1xTMTpro_zero [N-Term]	0	3.511e-05	2	-0.967018	24.2738	-5.35619	0.0020777	0.0626692	-0.894762	453	1	FALSE
YLPGPLQDMFK	P84086; P63040	1xTMTpro_zero [K11]; 1xTMTpro_zero [N-Term]	0	0.0006272	1	-0.965352	22.9097	-3.07056	0.0236072	0.258268	-3.44842	454	1	FALSE
LFQEDNGMPVHLK	P48771	1xTMTpro_zero [K13]; 1xTMTpro_zero [N-Term]	0	3.511e-05	2	-0.964321	22.1853	-5.30049	0.00218556	0.0638917	-0.947233	455	1	FALSE
MTAILTTDVSDK	Q8C8R3	1xTMTpro_zero [K12]; 1xTMTpro_zero [N-Term]	0	3.511e-05	2	-0.963448	22.2521	-6.05656	0.00113389	0.0522895	-0.272345	456	1	FALSE
WLSSEIEETKPAK	Q9DC69	2xTMTpro_zero [K10; K13]; 1xTMTpro_zero [N-Term]	0	0.0007542	3	-0.962553	20.4655	-1.96673	0.0996278	0.617487	-4.92361	457	1	FALSE
GWEEGVAQMSVGQR	P26883	1xTMTpro_zero [N-Term]	0	3.511e-05	2	-0.962451	22.1341	-5.99542	0.00119286	0.0529928	-0.324024	458	1	FALSE
MPFPVNHGASSEDSLLQDAAK	Q9R0P9	1xTMTpro_zero [K21]; 1xTMTpro_zero [N-Term]	0	3.511e-05	3	-0.959487	22.4601	-5.05197	0.00275211	0.0680969	-1.18695	459	1	FALSE
LEPENPPPYEEAMSVALK	Q99P72	1xTMTpro_zero [K18]; 1xTMTpro_zero [N-Term]	0	0.0005228	4	-0.959206	23.4779	-6.263	0.000958225	0.050662	-0.101402	460	1	FALSE
ALTVPELTQQMFDAK	Q9D6F9; Q9ERD7; P68372; Q922F4	1xTMTpro_zero [K15]; 1xTMTpro_zero [N-Term]	0	3.511e-05	2	-0.958342	26.9647	-5.34975	0.00208986	0.0627635	-0.900806	461	1	FALSE
FSMVQVWPVR	P50516	1xTMTpro_zero [N-Term]	0	0.0002715	0	-0.958216	22.2881	-4.76088	0.0036418	0.0785105	-1.47971	462	1	FALSE
KDLYANTVLSGGTTMYPGIADR	P60710	1xTMTpro_zero [K1]; 1xTMTpro_zero [N-Term]	1	3.511e-05	2	-0.958075	25.2255	-5.11585	0.00259186	0.0664942	-1.12444	463	1	FALSE
AAMGELYER	P19246	1xTMTpro_zero [N-Term]	0	0.0001793	2	-0.957385	22.0527	-5.7004	0.00153219	0.0556268	-0.580401	464	1	FALSE
HGLDVSACEVFR	Q8BH44	1xCarbamidomethyl [C8]; 1xTMTpro_zero [N-Term]	0	6.323e-05	2	-0.954451	20.7696	-2.53579	0.0466236	0.39871	-4.15626	465	1	FALSE
VQAELDETK	Q9CQW1	1xTMTpro_zero [K9]; 1xTMTpro_zero [N-Term]	0	0.0002306	3	-0.953373	20.579	-2.64154	0.04063	0.364523	-4.01425	466	1	FALSE
QILEMSAEEDNLEEDDTAVSGR	O88737	1xTMTpro_zero [N-Term]	0	3.511e-05	8	-0.952018	21.1336	-5.3395	0.00210936	0.0630767	-0.910433	467	1	FALSE
ITGTNAEVMPAQWEFQIGPCEGIR	P15105	1xCarbamidomethyl [C20]; 1xTMTpro_zero [N-Term]	0	3.511e-05	3	-0.95181	21.7367	-6.37117	0.00087884	0.0499428	-0.0139739	468	1	FALSE
IQLINNMLDK	P09411	1xTMTpro_zero [K10]; 1xTMTpro_zero [N-Term]	0	0.0002008	1	-0.950362	20.6056	-2.33075	0.0611024	0.471754	-4.43311	469	1	FALSE
GNEMSEVLR	P50516	1xTMTpro_zero [N-Term]	0	0.001345	2	-0.949248	23.0456	-5.18747	0.00242476	0.0648389	-1.0551	470	1	FALSE
LAAEDVTFIGPDTHAIQAMGDK	Q91ZA3	1xTMTpro_zero [K22]; 1xTMTpro_zero [N-Term]	0	3.511e-05	4	-0.947717	25.5681	-4.7158	0.00380712	0.0805753	-1.52624	471	1	FALSE
EDPNLVPSISNK	P19536	1xTMTpro_zero [K12]; 1xTMTpro_zero [N-Term]	0	3.511e-05	2	-0.946488	23.8559	-1.70793	0.141441	0.72413	-5.26415	472	1	FALSE
VVGAMQLYSVDR	Q68FD5	1xTMTpro_zero [N-Term]	0	0.0001288	1	-0.945934	25.3336	-4.99595	0.00290202	0.0694536	-1.24227	473	1	FALSE
DIVHSGLAYTMER	P26443	1xTMTpro_zero [N-Term]	0	0.002029	2	-0.944459	20.9857	-5.39676	0.00200299	0.061755	-0.856831	474	1	FALSE
DFQGMLEYK	Q99104	1xTMTpro_zero [K9]; 1xTMTpro_zero [N-Term]	0	0.0008544	2	-0.943454	20.5451	-5.95459	0.00123422	0.0537294	-0.358815	475	1	FALSE
VMELLLK	G5E8K5; Q02357	1xTMTpro_zero [K7]; 1xTMTpro_zero [N-Term]	0	0.0006959	1	-0.942753	21.0183	-6.05652	0.00113392	0.0522895	-0.272375	476	1	FALSE
SMTAELEELASIR	Q4ACU6	1xTMTpro_zero [N-Term]	0	3.511e-05	3	-0.942717	19.115	-4.58331	0.00434472	0.0868811	-1.66484	477	1	FALSE
EVFFMNTQSIVQLVQR	Q5SWU9	1xTMTpro_zero [N-Term]	0	3.511e-05	1	-0.941071	20.3454	-2.11016	0.0820903	0.560723	-4.73116	478	1	FALSE
ETADTDTADQVMASFK	Q7TPR4	1xTMTpro_zero [K16]; 1xTMTpro_zero [N-Term]	0	3.511e-05	4	-0.940922	23.4773	-5.50682	0.00181534	0.0592677	-0.755124	479	1	FALSE
LPLMECVQVTK	P47857; P12382	1xCarbamidomethyl [C6]; 1xTMTpro_zero [K11]; 1xTMTpro_zero [N-Term]	0	3.511e-05	1	-0.940585	22.4634	-5.37459	0.00204342	0.0621746	-0.877527	480	1	FALSE
WARPPISMNFEVPFAPSGLK	P84091	1xTMTpro_zero [K20]; 1xTMTpro_zero [N-Term]	0	0.0001288	1	-0.940576	21.1143	-6.41872	0.00084637	0.0499428	0.023998	481	1	FALSE
HMLDLQK	Q8R3V5	1xOxidation [M2]; 1xTMTpro_zero [K7]; 1xTMTpro_zero [N-Term]	0	0.002464	1	-0.93989	21.9433	-2.40813	0.0551456	0.442214	-4.32849	482	1	FALSE
VDLHFMK	Q8JZR6	1xTMTpro_zero [K7]; 1xTMTpro_zero [N-Term]	0	0.0004027	1	-0.939355	20.322	-5.11946	0.00258312	0.0663925	-1.12093	483	1	FALSE
IQEVDAQMLR	Q9CZ13	1xTMTpro_zero [N-Term]	0	0.0003679	2	-0.938898	21.2765	-5.5625	0.00172815	0.0586095	-0.704324	484	1	FALSE
AIAQSQSVQESMESLLQSIR	Q9QXZ0	1xTMTpro_zero [N-Term]	0	3.511e-05	2	-0.938872	22.4513	-2.10057	0.0831571	0.565151	-4.74408	485	1	FALSE
LQCPFVDVPTGTYPR	P97393	1xCarbamidomethyl [C3]; 1xTMTpro_zero [N-Term]	0	3.511e-05	1	-0.938728	20.8126	-5.38669	0.00202124	0.0619061	-0.866224	486	1	FALSE
ITLDNAYMEK	P52480	1xTMTpro_zero [K10]; 1xTMTpro_zero [N-Term]	0	3.511e-05	2	-0.937977	23.5754	-6.06077	0.00112995	0.0522895	-0.268803	487	1	FALSE
DSETEVEELR	Q4KMM3	1xTMTpro_zero [N-Term]	0	3.511e-05	5	-0.936889	23.3253	-3.13433	0.0218262	0.244162	-3.36613	488	1	FALSE
GETALHMAAR	Q8C8R3; G5E8K5	1xTMTpro_zero [N-Term]	0	0.0001288	1	-0.936355	23.0166	-6.58821	0.000741395	0.04952	0.15713	489	1	FALSE
MEDALDNYVIR	Q91ZA3	1xTMTpro_zero [N-Term]	0	3.511e-05	3	-0.93565	25.4181	-4.93145	0.00308632	0.072248	-1.30656	490	1	FALSE
YIEESIGESANLLGAMEK	Q8BLE7	1xTMTpro_zero [K18]; 1xTMTpro_zero [N-Term]	0	3.511e-05	4	-0.93558	20.9333	-4.79718	0.00351463	0.0776961	-1.44248	491	1	FALSE
MTVVQAYINEK	G5E829	1xTMTpro_zero [K11]; 1xTMTpro_zero [N-Term]	0	3.511e-05	1	-0.933873	22.8898	-3.90658	0.00887321	0.130798	-2.41731	492	1	FALSE
GDVEEVQGPGVVGEFPIISPGR	Q9DC63	1xTMTpro_zero [N-Term]	0	3.511e-05	4	-0.933446	21.667	-0.842214	0.433778	0.988687	-6.23263	493	1	FALSE
NFTTEQVTAMLLSK	Q61316	1xTMTpro_zero [K14]; 1xTMTpro_zero [N-Term]	0	3.511e-05	1	-0.933337	21.2851	-4.32239	0.00567645	0.100935	-1.94608	494	1	FALSE
DSIFGENMNELQTFVANR	P35436	1xTMTpro_zero [N-Term]	0	3.511e-05	3	-0.933002	19.5504	-4.763	0.00363424	0.0785105	-1.47753	495	1	FALSE
FMEQVIFK	Q99JY9	1xTMTpro_zero [K8]; 1xTMTpro_zero [N-Term]	0	0.0002209	1	-0.932123	20.0655	-4.75275	0.00367101	0.0787737	-1.48808	496	1	FALSE
VVHAFDMEDLGDK	Q91WS0	1xTMTpro_zero [K13]; 1xTMTpro_zero [N-Term]	0	3.511e-05	4	-0.929544	23.2334	-5.03474	0.00279724	0.0684782	-1.20391	497	1	FALSE
MKEIAEAYLGK	P63017	2xTMTpro_zero [K2; K11]; 1xTMTpro_zero [N-Term]	1	3.511e-05	2	-0.929249	24.4631	-4.59151	0.00430901	0.0863355	-1.65618	498	1	FALSE
ADIGVAMGIAGSDVSK	Q6PIC6	1xTMTpro_zero [K16]; 1xTMTpro_zero [N-Term]	0	3.511e-05	2	-0.928042	22.81	-5.5515	0.00174499	0.0587508	-0.714327	499	1	FALSE
LLDSSTVTHLFK	Q9QUM9	1xTMTpro_zero [K12]; 1xTMTpro_zero [N-Term]	0	0.0003189	1	-0.927965	20.8347	-2.24379	0.0686136	0.507216	-4.55073	500	1	FALSE
QFAPIHAEAPEFIEMSVEQEILVTGIK	P56480	1xTMTpro_zero [K27]; 1xTMTpro_zero [N-Term]	0	0.0001288	5	-0.92741	21.2446	-4.04154	0.00765383	0.119125	-2.26125	501	1	FALSE
EGMQLISEKPETEAVVK	Q62261	2xTMTpro_zero [K9; K17]; 1xTMTpro_zero [N-Term]	0	3.511e-05	4	-0.9264	24.0659	-4.50923	0.00468274	0.0902695	-1.74357	502	1	FALSE
EALSIIGDINTTTVSTPMPPPVDDSWLQVQSVPAGR	P39053	1xTMTpro_zero [N-Term]	0	3.511e-05	4	-0.925412	23.044	-5.51924	0.00179547	0.0592677	-0.743758	503	1	FALSE
SPDTSAYCYETMEK	P14873	1xCarbamidomethyl [C8]; 1xTMTpro_zero [K14]; 1xTMTpro_zero [N-Term]	0	3.511e-05	3	-0.922788	23.9447	-4.81149	0.00346589	0.0771913	-1.42787	504	1	FALSE
VTILGHVQR	Q9WUA3	1xTMTpro_zero [N-Term]	0	3.511e-05	0	-0.922568	24.4945	-2.13623	0.0792607	0.550216	-4.69602	505	1	FALSE
VSCLGVTDDGMAVATGSWDSFLK	P62874; P62880	1xCarbamidomethyl [C3]; 1xTMTpro_zero [K23]; 1xTMTpro_zero [N-Term]	0	3.511e-05	3	-0.920137	22.6274	-6.16061	0.00104109	0.0521837	-0.185508	506	1	FALSE
LPCQLHQVIVAR	O08529	1xCarbamidomethyl [C3]; 1xTMTpro_zero [N-Term]	0	3.511e-05	0	-0.919249	22.4279	-1.59104	0.165613	0.774848	-5.41342	507	1	FALSE
ITPSYVAFTPEGER	P20029	1xTMTpro_zero [N-Term]	0	3.511e-05	2	-0.918842	22.7988	-1.94498	0.102604	0.625646	-4.95262	508	1	FALSE
NMLFSGTNIAAGK	O55143	1xTMTpro_zero [K13]; 1xTMTpro_zero [N-Term]	0	3.511e-05	0	-0.91687	20.1767	-3.47536	0.014501	0.183472	-2.93578	509	1	FALSE
VGEQAQVVIIDMNDPSNPIR	Q68FD5	1xTMTpro_zero [N-Term]	0	3.511e-05	3	-0.916102	25.7465	-5.67691	0.00156369	0.0564755	-0.601327	510	1	FALSE
VVHIMDFQR	Q8K310	1xTMTpro_zero [N-Term]	0	0.0005047	1	-0.915913	20.8976	-3.37943	0.0162391	0.199651	-3.05511	511	1	FALSE
WTCTQSSISPQYNICEQMVQIR	Q5SQX6	2xCarbamidomethyl [C3; C15]; 1xTMTpro_zero [N-Term]	0	3.511e-05	1	-0.91517	21.2767	-5.17197	0.00245986	0.0650312	-1.07005	512	1	FALSE
FHILFK	P11627	1xTMTpro_zero [K6]; 1xTMTpro_zero [N-Term]	0	0.00136	0	-0.914881	21.77	-1.46842	0.195217	0.816304	-5.56572	513	1	FALSE
LMNETTAVALAYGIYK	Q61316; P48722	1xTMTpro_zero [K16]; 1xTMTpro_zero [N-Term]	0	6.323e-05	1	-0.913475	21.3684	-5.43363	0.00193774	0.0608224	-0.822563	514	1	FALSE
LSSQYAAVFGAPGHALHPGEPALGEVEER	Q9QYR6	1xTMTpro_zero [N-Term]	0	3.511e-05	4	-0.913228	21.9625	-1.07752	0.324982	0.93006	-6.00909	515	1	FALSE
VLASNPIMESIGNAK	Q99104	1xTMTpro_zero [K15]; 1xTMTpro_zero [N-Term]	0	3.511e-05	1	-0.912532	22.794	-5.86757	0.001328	0.0537294	-0.433694	516	1	FALSE
GEEVDQSAPEQEQPATVSHEEEQASTIR	Q9WV92	1xTMTpro_zero [N-Term]	0	3.511e-05	8	-0.911761	23.8345	-1.99762	0.0955516	0.606965	-4.88232	517	1	FALSE
SVLEAQR	Q9QZ06	1xTMTpro_zero [N-Term]	0	0.001266	1	-0.910028	22.515	-1.49255	0.189023	0.805805	-5.53615	518	1	FALSE
TTTNEELEDMLESGK	P61264	1xTMTpro_zero [K15]; 1xTMTpro_zero [N-Term]	0	3.511e-05	5	-0.909742	24.234	-4.80409	0.00349097	0.0775431	-1.43541	519	1	FALSE
MEIGLPDEK	P46460	1xTMTpro_zero [K9]; 1xTMTpro_zero [N-Term]	0	0.0001288	3	-0.907374	22.8547	-4.85997	0.0033064	0.0750007	-1.37857	520	1	FALSE
KMDVGGLSDPYVK	P46097; P46096	2xTMTpro_zero [K1; K13]; 1xTMTpro_zero [N-Term]	1	0.0002306	2	-0.907248	21.9037	-4.00273	0.00798396	0.121729	-2.30582	521	1	FALSE
DILITQMGTAQGVGLKPGPVPEPGAEPHR	O88737	1xTMTpro_zero [K16]; 1xTMTpro_zero [N-Term]	0	3.511e-05	3	-0.906784	23.1741	-4.86729	0.00328305	0.0748592	-1.37116	522	1	FALSE
LEMNLGLQK	Q62261	1xTMTpro_zero [K9]; 1xTMTpro_zero [N-Term]	0	3.511e-05	1	-0.906778	24.0962	-5.46411	0.00188565	0.0602756	-0.794381	523	1	FALSE
NVILMAHDGK	Q920I9	1xTMTpro_zero [K10]; 1xTMTpro_zero [N-Term]	0	6.323e-05	1	-0.905992	20.9296	-2.81069	0.0326996	0.318855	-3.78888	524	1	FALSE
QDSFPISLEQAVTDAAMTSK	P20357	1xTMTpro_zero [K20]; 1xTMTpro_zero [N-Term]	0	3.511e-05	3	-0.905506	23.8981	-3.77037	0.0103302	0.144364	-2.57785	525	1	FALSE
RLAAEDVTFIGPDTHAIQAMGDK	Q91ZA3	1xTMTpro_zero [K23]; 1xTMTpro_zero [N-Term]	1	3.511e-05	4	-0.904885	23.0163	-3.09248	0.0229774	0.25277	-3.42007	526	1	FALSE
LLQMQPAQHGEIIK	Q9JME5	1xTMTpro_zero [K14]; 1xTMTpro_zero [N-Term]	0	3.511e-05	1	-0.904278	21.0758	-5.05213	0.00275169	0.0680969	-1.18679	527	1	FALSE
KMDESEANEAPAGEAAAR	Q4KMM3	1xTMTpro_zero [K1]; 1xTMTpro_zero [N-Term]	1	3.511e-05	5	-0.902658	22.3466	-2.90815	0.0289054	0.296627	-3.66029	528	1	FALSE
MGVQSVAVYSEADR	Q99MR8	1xTMTpro_zero [N-Term]	0	3.511e-05	2	-0.901619	23.0044	-5.17729	0.00244773	0.0650312	-1.06491	529	1	FALSE
DKELLAPSGLPSK	Q9QXL2	2xTMTpro_zero [K2; K13]; 1xTMTpro_zero [N-Term]	1	3.511e-05	2	-0.901359	25.7291	-5.8713	0.00132382	0.0537294	-0.430464	530	1	FALSE
VIGGDDLSTLTGK	P00493	1xTMTpro_zero [K13]; 1xTMTpro_zero [N-Term]	0	3.511e-05	2	-0.9	24.0698	-1.58212	0.167615	0.778453	-5.42467	531	1	FALSE
FESLEPEMNNQASR	Q62261	1xTMTpro_zero [N-Term]	0	3.511e-05	3	-0.898724	23.8464	-5.01783	0.00284239	0.0688783	-1.22061	532	1	FALSE
SPLVMDVLNIQGVQR	Q9JHU4	1xTMTpro_zero [N-Term]	0	3.511e-05	1	-0.89811	21.012	-3.61426	0.01234	0.163729	-2.76553	533	1	FALSE
YPNKYESIIATLCENLDSLDEPDAR	Q9DBG3	1xCarbamidomethyl [C13]; 1xTMTpro_zero [K4]; 1xTMTpro_zero [N-Term]	1	0.00136	6	-0.896855	21.0222	-2.65785	0.0397815	0.358962	-3.99241	534	1	FALSE
VVLAAADLGTEAGVQR	Q64105	1xTMTpro_zero [N-Term]	0	3.511e-05	2	-0.894278	21.2877	-1.69877	0.143203	0.727227	-5.27597	535	1	FALSE
KSFNDDAMLIEK	Q99MR8	2xTMTpro_zero [K1; K12]; 1xTMTpro_zero [N-Term]	1	0.0002306	3	-0.893709	22.9956	-4.30524	0.00577904	0.101733	-1.96495	536	1	FALSE
LQQTQAQVDEVVDIMR	P63044	1xTMTpro_zero [N-Term]	0	3.511e-05	3	-0.89291	24.7019	-5.08918	0.00265743	0.0673545	-1.15047	537	1	FALSE
DMTSEELDDILR	Q8VDN2	1xTMTpro_zero [N-Term]	0	3.511e-05	5	-0.891675	23.8724	-5.90973	0.00128157	0.0537294	-0.397285	538	1	FALSE
IAVYSCPFDGMITETK	P42932	1xCarbamidomethyl [C6]; 1xTMTpro_zero [K16]; 1xTMTpro_zero [N-Term]	0	0.0001225	2	-0.889871	20.8456	-3.35696	0.016679	0.203969	-3.08327	539	1	FALSE
EVDEQMLSVQSK	Q9D6F9	1xTMTpro_zero [K12]; 1xTMTpro_zero [N-Term]	0	3.511e-05	3	-0.889188	25.1973	-4.49062	0.0047723	0.0915294	-1.76349	540	1	FALSE
MEGNAEESTLFCFAVR	Q68FD5	1xCarbamidomethyl [C12]; 1xTMTpro_zero [N-Term]	0	3.511e-05	3	-0.888844	22.216	-4.43232	0.0050657	0.0948029	-1.82624	541	1	FALSE
SGIIIGAEGDPPK	Q8K596	1xTMTpro_zero [K13]; 1xTMTpro_zero [N-Term]	0	3.511e-05	2	-0.888608	22.7117	-1.67775	0.147332	0.734954	-5.30303	542	1	FALSE
VQEQELK	Q8CAQ8	1xTMTpro_zero [K7]; 1xTMTpro_zero [N-Term]	0	6.323e-05	2	-0.887686	23.0515	-1.53959	0.177474	0.79198	-5.47792	543	1	FALSE
GQGTASPGSVSDLAQTVK	P51830	1xTMTpro_zero [K18]; 1xTMTpro_zero [N-Term]	0	3.511e-05	1	-0.887066	22.4702	-1.67056	0.148769	0.737742	-5.31225	544	1	FALSE
HGEEVTPEDVLSAAMYPDVFAQFK	Q05920	1xTMTpro_zero [K24]; 1xTMTpro_zero [N-Term]	0	3.511e-05	5	-0.886561	25.2533	-4.08546	0.00729866	0.116653	-2.21111	545	1	FALSE
IDPHVPNEMLYGR	O89112	1xTMTpro_zero [N-Term]	0	3.511e-05	2	-0.885751	22.1467	-5.82516	0.00137667	0.0541137	-0.470551	546	1	FALSE
LTAMLISSK	E9Q3L2	1xTMTpro_zero [K9]; 1xTMTpro_zero [N-Term]	0	0.001456	0	-0.884886	19.6408	-3.01392	0.0253233	0.27231	-3.52195	547	1	FALSE
CVELVHEEMQR	Q8K1M6	1xCarbamidomethyl [C1]; 1xTMTpro_zero [N-Term]	0	3.511e-05	3	-0.884435	20.7971	-3.85574	0.00938825	0.135113	-2.47688	548	1	FALSE
NLDLDSIIAEVK	Q8VED5	1xTMTpro_zero [K12]; 1xTMTpro_zero [N-Term]	0	3.511e-05	3	-0.884294	24.8577	-1.55473	0.173903	0.787149	-5.45903	549	1	FALSE
ENTEHLAEK	Q80U49	1xTMTpro_zero [K9]; 1xTMTpro_zero [N-Term]	0	0.0001452	3	-0.883453	21.7395	-1.96492	0.0998725	0.617487	-4.92603	550	1	FALSE
VLAVNQENEHLMEDYER	P57780	1xTMTpro_zero [N-Term]	0	3.511e-05	5	-0.883385	23.6435	-4.324	0.00566691	0.100935	-1.94431	551	1	FALSE
DGSASGTTLLEALDCILPPTRPTDKPLR	P10126	1xCarbamidomethyl [C15]; 1xTMTpro_zero [K25]; 1xTMTpro_zero [N-Term]	0	0.0001288	4	-0.88232	21.9053	-4.02556	0.00778788	0.120189	-2.27957	552	1	FALSE
ADSDSSQK	Q60875	1xTMTpro_zero [K8]; 1xTMTpro_zero [N-Term]	0	0.0001452	2	-0.880705	20.5848	-3.39969	0.0158536	0.195464	-3.02979	553	1	FALSE
LMNPVTK	Q3TXX4	1xTMTpro_zero [K7]; 1xTMTpro_zero [N-Term]	0	0.0002306	0	-0.879588	24.232	-5.7715	0.00144122	0.0549045	-0.517539	554	1	FALSE
MLQLVEESK	P60879	1xTMTpro_zero [K9]; 1xTMTpro_zero [N-Term]	0	3.511e-05	2	-0.878125	23.8013	-5.84984	0.00134811	0.0539412	-0.449077	555	1	FALSE
VDTVNNMADELINSGHSDAATIAEWK	Q62261	1xTMTpro_zero [K26]; 1xTMTpro_zero [N-Term]	0	3.511e-05	5	-0.878092	23.2654	-3.72423	0.0108833	0.149983	-2.63292	556	1	FALSE
VPLLLPNVSALESQIEMGNIVKPK	Q99P72	2xTMTpro_zero [K22; K24]; 1xTMTpro_zero [N-Term]	0	3.511e-05	2	-0.876351	23.3485	-4.2641	0.00603392	0.103582	-2.01043	557	1	FALSE
GPELLTMWFGESEANVR	Q01853	1xOxidation [M7]; 1xTMTpro_zero [N-Term]	0	3.511e-05	3	-0.876265	21.6465	-5.80487	0.00140068	0.0542477	-0.488274	558	1	FALSE
MPEDESTPEKR	Q91X97; P84075; P62748	1xTMTpro_zero [K10]; 1xTMTpro_zero [N-Term]	1	0.0001452	4	-0.875378	22.8435	-4.28243	0.00591882	0.102748	-1.99013	559	1	FALSE
DAMQYASESK	Q68FD5	1xTMTpro_zero [K10]; 1xTMTpro_zero [N-Term]	0	3.511e-05	2	-0.874398	23.4166	-5.36152	0.00206771	0.0626025	-0.889765	560	1	FALSE
ELIVDAEDTWIR	Q8BYI9	1xTMTpro_zero [N-Term]	0	0.0003862	4	-0.873558	20.4297	-1.71099	0.140856	0.722733	-5.26019	561	1	FALSE
EVDEQMLNVQNK	Q7TMM9; P99024; P68372; Q9CWF2	1xTMTpro_zero [K12]; 1xTMTpro_zero [N-Term]	0	3.511e-05	3	-0.873293	27.4786	-5.40085	0.00199562	0.0616648	-0.853018	562	1	FALSE
IVEFLQSFDEITAMTGDGVNDAPALK	O55143	1xTMTpro_zero [K26]; 1xTMTpro_zero [N-Term]	0	3.511e-05	5	-0.873137	22.0515	-4.1065	0.00713512	0.114964	-2.1872	563	1	FALSE
LPLMECVQMTQDVQK	Q9WUA3	1xCarbamidomethyl [C6]; 1xTMTpro_zero [K15]; 1xTMTpro_zero [N-Term]	0	0.002138	2	-0.872909	22.5559	-6.17883	0.00102575	0.0521837	-0.170441	564	1	FALSE
ASEWVQQVSGLMDGK	Q8BGQ7	1xTMTpro_zero [K15]; 1xTMTpro_zero [N-Term]	0	3.511e-05	2	-0.870366	20.795	-4.29798	0.00582312	0.101733	-1.97296	565	1	FALSE
GFCQVVISSNLR	Q91V14	1xCarbamidomethyl [C3]; 1xTMTpro_zero [N-Term]	0	3.511e-05	0	-0.869042	24.5101	-4.04129	0.00765585	0.119125	-2.26153	566	1	FALSE
VLVFVMGK	Q9JJV2	1xTMTpro_zero [K8]; 1xTMTpro_zero [N-Term]	0	0.0001452	0	-0.86552	23.2655	-5.0456	0.00276869	0.0680991	-1.19321	567	1	FALSE
NQMQIASTLLNYGAETNTVTK	Q8C8R3	1xTMTpro_zero [K21]; 1xTMTpro_zero [N-Term]	0	0.0003356	1	-0.864269	20.1668	-4.60132	0.00426679	0.0861069	-1.64584	568	1	FALSE
LQLEYVDVVFANRPDPNTPMEETVR	P62482	1xTMTpro_zero [N-Term]	0	3.511e-05	5	-0.862494	22.265	-3.37742	0.0162779	0.199951	-3.05763	569	1	FALSE
GQLQEAIEHYR	Q8CGY8	1xTMTpro_zero [N-Term]	0	3.511e-05	2	-0.862197	23.1257	-3.22966	0.0194337	0.225466	-3.24415	570	1	FALSE
TSDVETMSSQSALALDER	P14873	1xTMTpro_zero [N-Term]	0	3.511e-05	4	-0.8621	23.7831	-4.67393	0.00396836	0.0825435	-1.56974	571	1	FALSE
TSADGNEK	P61982	1xTMTpro_zero [K8]; 1xTMTpro_zero [N-Term]	0	6.323e-05	2	-0.860936	25.6407	-1.56953	0.170477	0.780564	-5.44049	572	1	FALSE
AVCMLSNTTAIAEAWAR	Q9JJZ2; P68369; P68368	1xCarbamidomethyl [C3]; 1xTMTpro_zero [N-Term]	0	3.511e-05	1	-0.860257	28.5451	-5.24424	0.00230106	0.0638917	-1.00068	573	1	FALSE
FEVQGLQPNGEEMTLK	Q02053	1xTMTpro_zero [K16]; 1xTMTpro_zero [N-Term]	0	0.0004175	3	-0.855502	19.8399	-3.92872	0.00865901	0.129466	-2.39151	574	1	FALSE
QADVPAAVTDAAATTPAAEDAATK	P06837	1xPhospho [T]; 1xTMTpro_zero [K24]; 1xTMTpro_zero [N-Term]	0	0.0001793	4	-0.855354	19.9973	-3.75806	0.0104746	0.145564	-2.5925	575	1	TRUE
GSFGELALMYNTPR	P31324; P12367	1xTMTpro_zero [N-Term]	0	3.511e-05	1	-0.855352	20.4624	-5.2011	0.00239437	0.0646481	-1.04199	576	1	FALSE
ATLEMVNHEK	P08553	1xTMTpro_zero [K10]; 1xTMTpro_zero [N-Term]	0	3.511e-05	2	-0.854464	25.6959	-4.74348	0.0037046	0.07925	-1.49763	577	1	FALSE
LDNVMLDAEGHIK	P63318	1xTMTpro_zero [K13]; 1xTMTpro_zero [N-Term]	0	3.511e-05	3	-0.852598	23.8977	-4.69631	0.00388123	0.0815281	-1.54645	578	1	FALSE
INMLVIELK	Q9JHU4	1xTMTpro_zero [K9]; 1xTMTpro_zero [N-Term]	0	6.323e-05	1	-0.85192	18.8337	-5.53615	0.0017688	0.0592288	-0.72831	579	1	FALSE
NVLGHMQQGGAPSPFDR	Q9WUA3	1xTMTpro_zero [N-Term]	0	3.511e-05	1	-0.85179	22.954	-3.87662	0.00917276	0.133389	-2.45236	580	1	FALSE
AMGVVVATGVNTEIGK	O55143	1xTMTpro_zero [K16]; 1xTMTpro_zero [N-Term]	0	0.0001288	1	-0.850047	19.9674	-4.39845	0.0052455	0.0965376	-1.86295	581	1	FALSE
DASGMLYNLASAIK	Q9JLM8	1xTMTpro_zero [K14]; 1xTMTpro_zero [N-Term]	0	3.511e-05	1	-0.849563	21.2846	-2.9934	0.0259783	0.276927	-3.54868	582	1	FALSE
WQIGEQEFEALMR	Q9QYC0	1xTMTpro_zero [N-Term]	0	3.511e-05	3	-0.849385	23.1993	-4.27091	0.00599085	0.103353	-2.00288	583	1	FALSE
TLETPAAQMEGFLNR	Q62261	1xTMTpro_zero [N-Term]	0	3.511e-05	2	-0.848027	24.1163	-4.66797	0.00399195	0.0827244	-1.57595	584	1	FALSE
SYLNMDAIMEAIKK	Q91ZA3	2xTMTpro_zero [K13; K14]; 1xTMTpro_zero [N-Term]	1	6.323e-05	2	-0.847499	20.9243	-3.79362	0.0100636	0.141921	-2.55023	585	1	FALSE
LQDIVSALEDR	P11881	1xTMTpro_zero [N-Term]	0	3.511e-05	3	-0.846671	22.7569	-1.53483	0.178612	0.792273	-5.48385	586	1	FALSE
GVSAIVYMVDAADQEK	Q8VEH3	1xTMTpro_zero [K16]; 1xTMTpro_zero [N-Term]	0	3.511e-05	3	-0.846608	21.2434	-4.01116	0.00791093	0.121137	-2.29612	587	1	FALSE
RFDEILEASDGIMVAR	P52480	1xTMTpro_zero [N-Term]	1	3.511e-05	4	-0.846472	23.5193	-4.01884	0.00784501	0.120669	-2.28729	588	1	FALSE
LQPSSTSESMDQLLSK	O70305	1xTMTpro_zero [K16]; 1xTMTpro_zero [N-Term]	0	3.511e-05	2	-0.84628	20.9825	-5.16171	0.00248339	0.0650312	-1.07995	589	1	FALSE
MPSKPGEDFEHAALVPDTSK	P20357	2xTMTpro_zero [K4; K20]; 1xTMTpro_zero [N-Term]	0	3.511e-05	4	-0.845793	26.0093	-4.46787	0.00488442	0.0927839	-1.78791	590	1	FALSE
DHGEVGMEEEPFALGAEASNFQQEPIAR	Q8CC35	1xTMTpro_zero [N-Term]	0	3.511e-05	7	-0.845342	21.7245	-3.76427	0.0104015	0.145088	-2.58511	591	1	FALSE
LELNENPDTLHQDIQEVR	Q8BG92	1xTMTpro_zero [N-Term]	0	3.511e-05	5	-0.845234	20.6942	-2.23922	0.0690339	0.5087	-4.55691	592	1	FALSE
VASALPGMENVQEK	P61294	1xTMTpro_zero [K14]; 1xTMTpro_zero [N-Term]	0	3.511e-05	2	-0.845065	21.0162	-4.27117	0.0059892	0.103353	-2.00259	593	1	FALSE
VDSILLTHIGDDNLPGINSMLQR	P14873	1xTMTpro_zero [N-Term]	0	3.511e-05	3	-0.844656	24.0099	-4.0101	0.00792003	0.121137	-2.29733	594	1	FALSE
LHQMIELSSK	Q8K0U4	1xTMTpro_zero [K10]; 1xTMTpro_zero [N-Term]	0	3.511e-05	1	-0.844644	23.8134	-4.7732	0.00359806	0.0784259	-1.46705	595	1	FALSE
EAESCDCLQGFQLTHSLGGGTGSGMGTLLISK	Q9D6F9; P99024; P68372	2xCarbamidomethyl [C5; C7]; 1xTMTpro_zero [K32]; 1xTMTpro_zero [N-Term]	0	3.511e-05	3	-0.844148	22.9606	-4.60444	0.00425344	0.0861069	-1.64255	596	1	FALSE
HEVTTEIVSLEVR	Q5DQR4	1xTMTpro_zero [N-Term]	0	0.0002008	3	-0.843804	24.4509	-5.09325	0.0026473	0.0673137	-1.14649	597	1	FALSE
LQHPDMLVTK	Q9Z2H5	1xTMTpro_zero [K10]; 1xTMTpro_zero [N-Term]	0	3.511e-05	1	-0.843553	22.5174	-4.06402	0.00746962	0.118526	-2.23554	598	1	FALSE
VIMVTGDHPITAK	Q8VDN2; Q6PIC6; Q6PIE5	1xTMTpro_zero [K13]; 1xTMTpro_zero [N-Term]	0	3.511e-05	1	-0.843456	26.5268	-5.16949	0.00246552	0.0650312	-1.07244	599	1	FALSE
KAYVEANQMLGDLIK	Q05920	2xTMTpro_zero [K1; K15]; 1xTMTpro_zero [N-Term]	1	3.511e-05	2	-0.84328	24.7569	-3.75008	0.0105695	0.146383	-2.60202	600	1	FALSE
RPDLLTMVVDYR	Q62048	1xTMTpro_zero [N-Term]	0	3.511e-05	2	-0.843217	21.3718	-3.05062	0.0241962	0.262645	-3.47425	601	1	FALSE
VSLQQSPLVMSSVVEK	Q9QYX7	1xTMTpro_zero [K16]; 1xTMTpro_zero [N-Term]	0	3.511e-05	1	-0.842987	21.6565	-4.55376	0.00447608	0.0882473	-1.69613	602	1	FALSE
VIESTQDLGNDLAGVMALQR	Q62261	1xTMTpro_zero [N-Term]	0	3.511e-05	3	-0.84039	25.1475	-4.37922	0.00535086	0.0976427	-1.88388	603	1	FALSE
DIEESSMVK	P08553	1xTMTpro_zero [K9]; 1xTMTpro_zero [N-Term]	0	3.511e-05	3	-0.840079	24.1603	-3.43335	0.0152354	0.189998	-2.98787	604	1	FALSE
LPTAVSLYSPTDEQSVMQK	Q9QYX7	1xTMTpro_zero [K19]; 1xTMTpro_zero [N-Term]	0	3.511e-05	2	-0.838684	20.1178	-2.2318	0.0697226	0.512398	-4.56694	605	1	FALSE
GAAMVTAVAYR	P17710	1xTMTpro_zero [N-Term]	0	0.0001452	0	-0.837886	22.0879	-4.52518	0.00460749	0.0901084	-1.72654	606	1	FALSE
GKVPVTYLELLS	Q8R3V5	1xTMTpro_zero [K2]; 1xTMTpro_zero [N-Term]	1	0.002664	1	-0.837172	21.0868	-2.1349	0.0794026	0.550216	-4.69782	607	1	FALSE
MAVTFIGNSTAIQELFK	P99024	1xTMTpro_zero [K17]; 1xTMTpro_zero [N-Term]	0	3.511e-05	1	-0.836824	23.5712	-4.72468	0.00377389	0.080116	-1.51705	608	1	FALSE
VLTPTQVMNRPSSISWDGLDPGK	P70296	1xTMTpro_zero [K23]; 1xTMTpro_zero [N-Term]	0	0.0008969	2	-0.83545	21.642	-3.34019	0.0170156	0.2061	-3.10432	609	1	FALSE
RQSESIAAPPVASEDMDK	Q8BPN8	1xTMTpro_zero [K18]; 1xTMTpro_zero [N-Term]	1	3.511e-05	4	-0.833783	21.0612	-4.31713	0.00570767	0.101102	-1.95186	610	1	FALSE
ALTVPELTQQMFDSK	Q7TMM9; Q9CWF2	1xTMTpro_zero [K15]; 1xTMTpro_zero [N-Term]	0	3.511e-05	2	-0.830528	26.5093	-4.52328	0.00461637	0.0901241	-1.72857	611	1	FALSE
EMAELTR	Q62261	1xTMTpro_zero [N-Term]	0	0.002277	2	-0.830499	24.2276	-5.51444	0.00180312	0.0592677	-0.748146	612	1	FALSE
NLLDIDAPVTVCGDIHGQFFDLMK	P63328	1xCarbamidomethyl [C12]; 1xTMTpro_zero [K24]; 1xTMTpro_zero [N-Term]	0	3.511e-05	4	-0.830083	22.4208	-4.48424	0.00480342	0.0918729	-1.77032	613	1	FALSE
VDLTQMQTFWK	Q9R0N7	1xTMTpro_zero [K11]; 1xTMTpro_zero [N-Term]	0	0.0001793	1	-0.82897	19.6812	-2.82312	0.032187	0.316326	-3.77243	614	1	FALSE
ALMEEFFR	Q01065	1xTMTpro_zero [N-Term]	0	0.0008969	2	-0.827342	20.9255	-5.19577	0.00240619	0.0647143	-1.04711	615	1	FALSE
ASADLMSYCEEHAR	Q9DAS9	1xCarbamidomethyl [C9]; 1xTMTpro_zero [N-Term]	0	3.511e-05	3	-0.825444	20.4038	-5.82432	0.00137765	0.0541137	-0.471284	616	1	FALSE
DMLMQFVTK	P39053	1xOxidation [M2]; 1xTMTpro_zero [K9]; 1xTMTpro_zero [N-Term]	0	0.0002209	1	-0.825191	20.6758	-2.64397	0.0405022	0.363813	-4.01099	617	1	FALSE
TIGISVDPR	P47963	1xTMTpro_zero [N-Term]	0	0.001729	1	-0.824172	21.7335	-1.38108	0.219263	0.845501	-5.67095	618	1	FALSE
TDGCHAYLSK	P40124	1xCarbamidomethyl [C4]; 1xTMTpro_zero [K10]; 1xTMTpro_zero [N-Term]	0	6.323e-05	1	-0.8237	22.2541	-1.23882	0.264276	0.885708	-5.83533	619	1	FALSE
YYTSASGDEMVSLK	P07901	1xTMTpro_zero [K14]; 1xTMTpro_zero [N-Term]	0	3.511e-05	2	-0.822287	21.9638	-4.93152	0.00308612	0.072248	-1.30649	620	1	FALSE
YDHLDPAEMER	P48722	1xTMTpro_zero [N-Term]	0	6.323e-05	4	-0.820541	20.8191	-4.7613	0.00364028	0.0785105	-1.47928	621	1	FALSE
SDNILLGMDGSVK	O88643; Q61036	1xTMTpro_zero [K13]; 1xTMTpro_zero [N-Term]	0	3.511e-05	2	-0.820373	21.586	-2.56003	0.0451711	0.389884	-4.12365	622	1	FALSE
LTSEEVFDMDGIPR	P48453	1xTMTpro_zero [N-Term]	0	3.511e-05	4	-0.818171	21.0737	-3.12035	0.0222036	0.246795	-3.38412	623	1	FALSE
KAVDVFFPPEAQNDFPVAMQISEK	Q68FD5	2xTMTpro_zero [K1; K24]; 1xTMTpro_zero [N-Term]	1	0.0001288	4	-0.817548	25.8294	-4.86361	0.00329478	0.0748592	-1.37488	624	1	FALSE
SIMAAAGVPVVEGYHGK	Q99MR8	1xTMTpro_zero [K17]; 1xTMTpro_zero [N-Term]	0	3.511e-05	1	-0.817499	24.0317	-4.47444	0.00485173	0.0924156	-1.78085	625	1	FALSE
IGHYVLGDTLGVGTFGK	Q8BRK8	1xTMTpro_zero [K17]; 1xTMTpro_zero [N-Term]	0	0.0002306	1	-0.816565	20.3007	-1.15248	0.295426	0.910663	-5.93018	626	1	FALSE
LVTMQIWDTAGQER	P51150	1xTMTpro_zero [N-Term]	0	3.511e-05	2	-0.814884	21.7484	-2.73161	0.0361764	0.336476	-3.89393	627	1	FALSE
ANIPIMDTGENPEVPFPR	Q9Z1G4	1xTMTpro_zero [N-Term]	0	3.511e-05	3	-0.814298	20.3543	-5.22646	0.002339	0.0638917	-1.01767	628	1	FALSE
VMEPILQILQQK	E9Q3L2	1xTMTpro_zero [K12]; 1xTMTpro_zero [N-Term]	0	3.511e-05	1	-0.813271	20.5048	-5.32863	0.00213028	0.063361	-0.920665	629	1	FALSE
AVVMDLLR	Q5SWU9	1xTMTpro_zero [N-Term]	0	0.001692	1	-0.812678	21.8405	-3.85893	0.00935492	0.134938	-2.47313	630	1	FALSE
KLDVSIEMPEELDISQLR	P56399	1xTMTpro_zero [K1]; 1xTMTpro_zero [N-Term]	1	3.511e-05	5	-0.810894	22.28	-4.14597	0.00683942	0.111856	-2.14255	631	1	FALSE
NFLEGDWK	Q8R3V5	1xTMTpro_zero [K8]; 1xTMTpro_zero [N-Term]	0	0.0007754	2	-0.810426	21.3729	-2.33488	0.0607681	0.470479	-4.42753	632	1	FALSE
HLLVMK	Q8VDN2	1xTMTpro_zero [K6]; 1xTMTpro_zero [N-Term]	0	0.0006959	0	-0.810055	23.0658	-5.72079	0.00150544	0.0553773	-0.562304	633	1	FALSE
IGVGAMTWSPLACGIVSGK	P62482	1xCarbamidomethyl [C13]; 1xTMTpro_zero [K19]; 1xTMTpro_zero [N-Term]	0	3.511e-05	0	-0.809764	20.173	-3.26074	0.0187175	0.21982	-3.20465	634	1	FALSE
LLIEMEQR	Q04447	1xTMTpro_zero [N-Term]	0	0.0001793	2	-0.809631	26.5029	-5.08467	0.0026687	0.0673545	-1.15488	635	1	FALSE
EQMAISGGFIR	P60879	1xTMTpro_zero [N-Term]	0	3.511e-05	1	-0.809484	24.7006	-5.22697	0.0023379	0.0638917	-1.01719	636	1	FALSE
YNPENLATLER	Q9DBZ5	1xTMTpro_zero [N-Term]	0	0.000162	2	-0.808185	22.7114	-3.91808	0.00876119	0.130154	-2.40389	637	1	FALSE
NLINQMLTINPAK	P28652; Q923T9	1xTMTpro_zero [K13]; 1xTMTpro_zero [N-Term]	0	3.511e-05	0	-0.808073	25.7592	-4.29056	0.00586855	0.102003	-1.98115	638	1	FALSE
MQFSFEGPEK	Q8R0S2	1xTMTpro_zero [K10]; 1xTMTpro_zero [N-Term]	0	0.001947	2	-0.80716	21.111	-3.54832	0.0133176	0.172988	-2.84598	639	1	FALSE
IDDLQMVLNQTEDHR	Q9Z1G4	1xTMTpro_zero [N-Term]	0	3.511e-05	4	-0.806931	23.4699	-4.20733	0.00640678	0.107732	-2.07363	640	1	FALSE
MYKEEGLNAFYK	Q8VEM8	2xTMTpro_zero [K3; K12]; 1xTMTpro_zero [N-Term]	1	3.511e-05	2	-0.806517	22.5867	-4.29835	0.00582088	0.101733	-1.97255	641	1	FALSE
GAILTTMLATR	P11798; P28652; Q6PHZ2	1xTMTpro_zero [N-Term]	0	3.511e-05	0	-0.805994	27.5425	-4.55331	0.00447812	0.0882473	-1.69661	642	1	FALSE
SQLDINNK	Q8K1M6	1xTMTpro_zero [K8]; 1xTMTpro_zero [N-Term]	0	0.0001288	1	-0.805245	21.1191	-2.74011	0.0357843	0.335833	-3.88262	643	1	FALSE
LGEHEFEALMR	Q9QYB8	1xTMTpro_zero [N-Term]	0	6.323e-05	3	-0.803922	22.2675	-3.5201	0.0137621	0.177351	-2.88062	644	1	FALSE
LPYNVSDDPWLVAYNFLQK	P27612	1xTMTpro_zero [K19]; 1xTMTpro_zero [N-Term]	0	3.511e-05	2	-0.803809	20.3518	-1.43144	0.205084	0.829995	-5.61064	645	1	FALSE
GSTDNLMDDIER	P42932	1xTMTpro_zero [N-Term]	0	3.511e-05	4	-0.803459	21.3219	-5.378	0.00203715	0.0621196	-0.874342	646	1	FALSE
EELLEYEEK	P56399	1xTMTpro_zero [K9]; 1xTMTpro_zero [N-Term]	0	0.001742	5	-0.801195	20.121	-1.51014	0.184624	0.799861	-5.51446	647	1	FALSE
EKVGEQAQVVIIDMNDPSNPIR	Q68FD5	1xTMTpro_zero [K2]; 1xTMTpro_zero [N-Term]	1	3.511e-05	4	-0.800345	23.6973	-4.26287	0.00604169	0.103588	-2.01179	648	1	FALSE
LVSSPCCIVTSTYGWTANMER	P11499	2xCarbamidomethyl [C6; C7]; 1xTMTpro_zero [N-Term]	0	3.511e-05	1	-0.799327	21.5143	-2.52372	0.0473662	0.40283	-4.17252	649	1	FALSE
DIMEDTIEDKLDTK	O08599	2xTMTpro_zero [K10; K14]; 1xTMTpro_zero [N-Term]	1	3.511e-05	6	-0.793868	26.109	-4.31179	0.00573961	0.101389	-1.95774	650	1	FALSE
KDTMTAQNTGVSTLYR	O35927	1xTMTpro_zero [K1]; 1xTMTpro_zero [N-Term]	1	0.00102	1	-0.793796	21.4442	-4.25659	0.00608178	0.104147	-2.01876	651	1	FALSE
LSVWAVSLQGK	Q80VP0	1xTMTpro_zero [K11]; 1xTMTpro_zero [N-Term]	0	3.511e-05	0	-0.79337	21.6207	-1.22414	0.269358	0.891321	-5.85173	652	1	FALSE
QMVETELK	P62259	1xTMTpro_zero [K8]; 1xTMTpro_zero [N-Term]	0	0.0002306	2	-0.792788	21.7237	-2.0453	0.0895912	0.58714	-4.8184	653	1	FALSE
EGEDMIAEEHFGSEK	Q62261	1xTMTpro_zero [K15]; 1xTMTpro_zero [N-Term]	0	3.511e-05	6	-0.791154	23.3622	-3.66741	0.0116104	0.156893	-2.7012	654	1	FALSE
SFYPEEVSSMVLTK	P63017	1xTMTpro_zero [K14]; 1xTMTpro_zero [N-Term]	0	6.323e-05	2	-0.791023	23.4204	-5.24407	0.0023014	0.0638917	-1.00084	655	1	FALSE
GMSLNLEPDNVGVVVFGNDK	Q03265	1xTMTpro_zero [K20]; 1xTMTpro_zero [N-Term]	0	3.511e-05	3	-0.789896	22.5086	-4.71715	0.00380203	0.0805753	-1.52484	656	1	FALSE
NPDILVGENDLTALSYLHEPAVLHNLR	Q99104	1xTMTpro_zero [N-Term]	0	0.0001288	4	-0.787373	23.0967	-1.27477	0.252177	0.875975	-5.79468	657	1	FALSE
LMDEVAGIVAAR	Q91V12	1xTMTpro_zero [N-Term]	0	3.511e-05	2	-0.78715	22.4079	-4.57448	0.00438349	0.0874497	-1.67417	658	1	FALSE
FDDAVVQSDMK	P63017	1xTMTpro_zero [K11]; 1xTMTpro_zero [N-Term]	0	0.0001288	3	-0.787017	21.4092	-5.45728	0.00189717	0.0605051	-0.800682	659	1	FALSE
MYESFIESLPFLK	P31324	1xTMTpro_zero [K13]; 1xTMTpro_zero [N-Term]	0	0.002165	2	-0.78641	19.8191	-2.47515	0.0504823	0.420837	-4.23799	660	1	FALSE
ILQEGVDPK	Q8BMS1	1xTMTpro_zero [K9]; 1xTMTpro_zero [N-Term]	0	0.001292	2	-0.785437	20.5367	-2.18698	0.0740377	0.529358	-4.62752	661	1	FALSE
EVDEQMLAIQSK	Q9ERD7	1xTMTpro_zero [K12]; 1xTMTpro_zero [N-Term]	0	3.511e-05	3	-0.785064	25.6243	-5.24919	0.00229062	0.0638917	-0.995961	662	1	FALSE
FPSSFAEPLDKGEMEFK	P20357	2xTMTpro_zero [K11; K17]; 1xTMTpro_zero [N-Term]	1	0.001043	4	-0.783029	24.8226	-4.51782	0.00464205	0.0901504	-1.73439	663	1	FALSE
VILQAANSDIQQAWVQDINQVLETQR	A2CG49	1xTMTpro_zero [N-Term]	0	3.511e-05	3	-0.782942	21.5635	-5.25896	0.00227017	0.0638917	-0.986651	664	1	FALSE
HGNALWLNER	Q91ZA3	1xTMTpro_zero [N-Term]	0	3.511e-05	1	-0.78262	25.1207	-4.75367	0.00366768	0.0787737	-1.48713	665	1	FALSE
GPETSSLDLDIQTQLEK	Q8C437	1xTMTpro_zero [K17]; 1xTMTpro_zero [N-Term]	0	3.511e-05	4	-0.781915	21.3387	-1.42871	0.205828	0.829995	-5.61393	666	1	FALSE
DSTLIMQLLR	P68510; P68254; P61982; Q9CQV8; P63101; P62259	1xTMTpro_zero [N-Term]	0	3.511e-05	1	-0.781284	25.789	-4.39659	0.00525559	0.0965376	-1.86497	667	1	FALSE
ADDPSSYMEVVQAANASGNWEELVK	Q68FD5	1xTMTpro_zero [K25]; 1xTMTpro_zero [N-Term]	0	3.511e-05	5	-0.781155	25.0044	-4.55747	0.00445937	0.0882473	-1.6922	668	1	FALSE
FVEVMSEYNATQSDYR	O35526	1xTMTpro_zero [N-Term]	0	3.511e-05	3	-0.779176	21.2469	-3.08167	0.0232856	0.255553	-3.43404	669	1	FALSE
QEMQEVQSSR	O88569	1xTMTpro_zero [N-Term]	0	3.511e-05	2	-0.778845	21.7117	-4.0391	0.00767408	0.119227	-2.26404	670	1	FALSE
AAELETAR	Q6NS60	1xTMTpro_zero [N-Term]	0	0.0007223	2	-0.778385	21.3106	-1.24246	0.263027	0.883851	-5.83125	671	1	FALSE
EMSLYASLASEK	P14873	1xTMTpro_zero [K12]; 1xTMTpro_zero [N-Term]	0	3.511e-05	2	-0.778234	24.5023	-3.07932	0.0233533	0.255979	-3.43708	672	1	FALSE
VEGELEEMER	Q61879	1xTMTpro_zero [N-Term]	0	0.0007223	5	-0.777883	21.3284	-5.23661	0.00231725	0.0638917	-1.00797	673	1	FALSE
ETTGGAPTMSPDLEQEQLTIR	Q9ES97	1xTMTpro_zero [N-Term]	0	3.511e-05	4	-0.777494	22.2113	-5.1489	0.00251317	0.0653661	-1.09235	674	1	FALSE
NTGIICTIGPASR	P52480	1xCarbamidomethyl [C6]; 1xTMTpro_zero [N-Term]	0	3.511e-05	0	-0.774078	25.241	-3.00602	0.0255731	0.273745	-3.53222	675	1	FALSE
AALDCCVVDVQEYSADPHAIAGALK	Q5SSM3	2xCarbamidomethyl [C5; C6]; 1xTMTpro_zero [K25]; 1xTMTpro_zero [N-Term]	0	3.511e-05	4	-0.773791	21.3977	-2.7225	0.0366021	0.339981	-3.90607	676	1	FALSE
AEGSDVANAVLDGADCIMLSGETAK	P52480	1xCarbamidomethyl [C16]; 1xTMTpro_zero [K25]; 1xTMTpro_zero [N-Term]	0	3.511e-05	5	-0.77288	23.7483	-3.85717	0.00937325	0.135062	-2.47519	677	1	FALSE
LKGSQGTGK	Q9WUA3	2xTMTpro_zero [K2; K9]; 1xTMTpro_zero [N-Term]	1	0.0002306	0	-0.772805	23.7692	-2.03545	0.0907915	0.590485	-4.83163	678	1	FALSE
TLVLLMGK	P62962	1xTMTpro_zero [K8]; 1xTMTpro_zero [N-Term]	0	0.001809	0	-0.77097	19.3647	-2.13513	0.0793775	0.550216	-4.6975	679	1	FALSE
ICDPGLTSFEPEALGNLVEGMDFHR	P28652	1xCarbamidomethyl [C2]; 1xTMTpro_zero [N-Term]	0	3.511e-05	5	-0.77091	23.892	-4.50884	0.00468461	0.0902695	-1.74399	680	1	FALSE
YANVIAYDHSR	B0V2N1; Q64487	1xTMTpro_zero [N-Term]	0	0.0001793	1	-0.770018	22.377	-1.36468	0.22407	0.852448	-5.69036	681	1	FALSE
QMVEHGGFYR	Q9JHU4	1xTMTpro_zero [N-Term]	0	0.0003531	1	-0.769556	21.742	-2.76327	0.0347385	0.330724	-3.8518	682	1	FALSE
GKFTTSDVAAIETDKEGVQNAK	P17710	3xTMTpro_zero [K2; K15; K22]; 1xTMTpro_zero [N-Term]	2	0.001704	4	-0.768423	22.7349	-2.46326	0.0512779	0.425429	-4.25403	683	1	FALSE
SCGGCGLEIK	Q8BL65	2xCarbamidomethyl [C2; C5]; 1xTMTpro_zero [K10]; 1xTMTpro_zero [N-Term]	0	0.0001452	1	-0.76677	21.719	-1.57131	0.17007	0.780564	-5.43825	684	1	FALSE
LKDLNSQADSLMTSSAFDTSQVK	P16546	2xTMTpro_zero [K2; K23]; 1xTMTpro_zero [N-Term]	1	0.0001793	3	-0.766468	23.841	-3.3037	0.0177751	0.212993	-3.15029	685	1	FALSE
ESESCDCLQGFQLTHSLGGGTGSGMGTLLISK	Q7TMM9; Q9CWF2	2xCarbamidomethyl [C5; C7]; 1xTMTpro_zero [K32]; 1xTMTpro_zero [N-Term]	0	3.511e-05	3	-0.76519	21.986	-2.88524	0.0297521	0.302479	-3.69042	686	1	FALSE
QHAFGMAENEDFR	Q64332	1xTMTpro_zero [N-Term]	0	3.511e-05	3	-0.762724	22.793	-4.60521	0.00425014	0.0861069	-1.64173	687	1	FALSE
NVQAEEMVEFSSGLK	Q03265	1xTMTpro_zero [K15]; 1xTMTpro_zero [N-Term]	0	3.511e-05	3	-0.762565	22.535	-4.04679	0.0076103	0.119125	-2.25523	688	1	FALSE
VFDAIMNFR	P58252	1xTMTpro_zero [N-Term]	0	0.001925	1	-0.761801	21.6392	-3.79228	0.0100787	0.141991	-2.55182	689	1	FALSE
NLEYTASLLEAVYIDETR	Q01065	1xTMTpro_zero [N-Term]	0	3.511e-05	4	-0.761625	21.6148	-5.1226	0.00257557	0.0663925	-1.11788	690	1	FALSE
NIQVDSPYDISR	Q91YQ5	1xTMTpro_zero [N-Term]	0	0.002042	2	-0.761286	21.2805	-4.04528	0.00762278	0.119125	-2.25696	691	1	FALSE
VPSEAPSPMPTHR	Q8BJI1	1xTMTpro_zero [N-Term]	0	0.001729	1	-0.758571	20.9321	-2.80394	0.0329816	0.320482	-3.79782	692	1	FALSE
VLAMSGDPNYLHR	Q76MZ3	1xTMTpro_zero [N-Term]	0	3.511e-05	1	-0.757924	22.1161	-5.22484	0.00234248	0.0638917	-1.01922	693	1	FALSE
DDEEMNTWIQAISSAISSDK	Q62261	1xTMTpro_zero [K20]; 1xTMTpro_zero [N-Term]	0	3.511e-05	5	-0.757521	22.6772	-5.19795	0.00240135	0.0647109	-1.04502	694	1	FALSE
DQFPEVYVPTVFENYVADIEVDGK	Q9QUI0	1xTMTpro_zero [K24]; 1xTMTpro_zero [N-Term]	0	6.323e-05	6	-0.756342	22.1926	-2.22457	0.070401	0.515224	-4.57672	695	1	FALSE
FQSISTEFLALMK	Q9JHU4	1xTMTpro_zero [K13]; 1xTMTpro_zero [N-Term]	0	3.511e-05	1	-0.755574	20.6698	-4.04762	0.00760348	0.119125	-2.25428	696	1	FALSE
EDLMGLAIGTHGANIQQAR	Q9WVR4; P35922	1xTMTpro_zero [N-Term]	0	3.511e-05	2	-0.755417	20.8732	-3.653	0.0118033	0.158882	-2.71859	697	1	FALSE
QGQGQLVTCSGAFK	Q3U1J4	1xCarbamidomethyl [C9]; 1xTMTpro_zero [K14]; 1xTMTpro_zero [N-Term]	0	3.511e-05	0	-0.755335	20.8488	-3.46014	0.0147624	0.185765	-2.95462	698	1	FALSE
EEAISNMVVALK	Q5SWU9	1xTMTpro_zero [K12]; 1xTMTpro_zero [N-Term]	0	3.511e-05	2	-0.75511	21.6996	-4.51797	0.00464135	0.0901504	-1.73424	699	1	FALSE
FMELLEPLSER	Q62261	1xTMTpro_zero [N-Term]	0	3.511e-05	3	-0.754864	23.9165	-5.04435	0.00277196	0.0680991	-1.19444	700	1	FALSE
YSDMIVAAIQAEK	P10922	1xTMTpro_zero [K13]; 1xTMTpro_zero [N-Term]	0	3.511e-05	2	-0.75435	25.0103	-4.30318	0.0057915	0.101733	-1.96722	701	1	FALSE
IVYCTMEVEGGEK	Q8BYR5; Q80TJ1	1xCarbamidomethyl [C4]; 1xTMTpro_zero [K13]; 1xTMTpro_zero [N-Term]	0	3.511e-05	3	-0.754225	22.2341	-4.72592	0.00376928	0.080116	-1.51577	702	1	FALSE
EGPAVVGQFIQDVK	Q6ZQ38	1xTMTpro_zero [K14]; 1xTMTpro_zero [N-Term]	0	3.511e-05	2	-0.752674	22.8933	-1.62371	0.158481	0.761201	-5.37206	703	1	FALSE
VPSTEAEALASSLMGLFEK	Q61598	1xTMTpro_zero [K19]; 1xTMTpro_zero [N-Term]	0	3.511e-05	3	-0.75211	21.8641	-3.76015	0.01045	0.145453	-2.59002	704	1	FALSE
LAPEVMEDLVK	P62761	1xTMTpro_zero [K11]; 1xTMTpro_zero [N-Term]	0	6.323e-05	3	-0.75184	24.566	-4.21144	0.00637894	0.107514	-2.06904	705	1	FALSE
VAQTDGVNVEMHLK	P23242	1xTMTpro_zero [K14]; 1xTMTpro_zero [N-Term]	0	3.511e-05	2	-0.749455	20.818	-3.61197	0.0123727	0.163897	-2.76832	706	1	FALSE
FSNEEIAMATVTALR	P05064	1xTMTpro_zero [N-Term]	0	3.511e-05	2	-0.748417	25.3152	-4.24451	0.0061597	0.104822	-2.03217	707	1	FALSE
SISFASGGDPDTTDYVAYVAK	Q61120	1xTMTpro_zero [K21]; 1xTMTpro_zero [N-Term]	0	0.0002306	3	-0.746354	20.2684	-1.90343	0.108541	0.640683	-5.00788	708	1	FALSE
IQFNESFAEMNR	P19783	1xTMTpro_zero [N-Term]	0	6.323e-05	2	-0.744175	21.5894	-4.76673	0.00362096	0.0784259	-1.4737	709	1	FALSE
TVGMVAGDEETYEVFAELFDPVIQER	P30275	1xTMTpro_zero [N-Term]	0	3.511e-05	7	-0.743227	19.9859	-1.21188	0.27367	0.893283	-5.86535	710	1	FALSE
VLAVNQENEQLMEDYEK	Q7TPR4	1xOxidation [M12]; 1xTMTpro_zero [K17]; 1xTMTpro_zero [N-Term]	0	3.511e-05	5	-0.743147	22.8638	-2.13963	0.0788992	0.549371	-4.69144	711	1	FALSE
GIQEEMEALVK	O08553	1xTMTpro_zero [K11]; 1xTMTpro_zero [N-Term]	0	3.511e-05	3	-0.741836	27.9239	-3.851	0.00943787	0.135253	-2.48245	712	1	FALSE
IEVIEIMTDR	P49312	1xTMTpro_zero [N-Term]	0	6.323e-05	3	-0.741694	21.8897	-4.59218	0.00430612	0.0863355	-1.65547	713	1	FALSE
ILSDVTHSAVFGVPASK	Q3UHJ0	1xTMTpro_zero [K17]; 1xTMTpro_zero [N-Term]	0	3.511e-05	1	-0.741056	23.0256	-1.46659	0.195695	0.816574	-5.56796	714	1	FALSE
VVGAMQLYSVDRK	Q68FD5	1xTMTpro_zero [K13]; 1xTMTpro_zero [N-Term]	1	0.00279	1	-0.741043	22.0759	-3.83337	0.00962532	0.136851	-2.50321	715	1	FALSE
DVSSVELLMNNHQGIK	Q62261	1xTMTpro_zero [K16]; 1xTMTpro_zero [N-Term]	0	3.511e-05	2	-0.739553	24.6665	-4.8421	0.00336419	0.0759438	-1.39669	716	1	FALSE
IAENNDLLWMDYHQK	O08539	1xTMTpro_zero [K15]; 1xTMTpro_zero [N-Term]	0	0.0007136	3	-0.739324	21.1754	-5.01709	0.00284438	0.0688783	-1.22134	717	1	FALSE
LLETCSIALVGK	P70698	1xCarbamidomethyl [C5]; 1xTMTpro_zero [K12]; 1xTMTpro_zero [N-Term]	0	0.0001288	1	-0.738825	19.7561	-3.34295	0.0169598	0.205603	-3.10085	718	1	FALSE
DVVDESNINK	Q04690	1xTMTpro_zero [K10]; 1xTMTpro_zero [N-Term]	0	0.002765	3	-0.737931	21.3542	-0.979168	0.367443	0.952608	-6.10726	719	1	FALSE
ENALSELDVPFK	Q8BX70	1xTMTpro_zero [K12]; 1xTMTpro_zero [N-Term]	0	3.511e-05	3	-0.73793	21.2571	-2.90347	0.0290763	0.297941	-3.66644	720	1	FALSE
AANANNEK	P63137	1xTMTpro_zero [K8]; 1xTMTpro_zero [N-Term]	0	6.323e-05	1	-0.73596	21.4512	-1.94898	0.10205	0.623741	-4.9473	721	1	FALSE
FFGTFPGNYVK	Q3UTJ2	1xTMTpro_zero [K11]; 1xTMTpro_zero [N-Term]	0	0.0001288	0	-0.735692	21.464	-2.18244	0.0744905	0.530902	-4.63366	722	1	FALSE
DVAWAPSIGLPTSTIASCSQDGR	Q9D1M0	1xCarbamidomethyl [C18]; 1xTMTpro_zero [N-Term]	0	3.511e-05	2	-0.735425	20.8158	-1.98591	0.0970768	0.61041	-4.89799	723	1	FALSE
TIQEMQQK	P57780	1xTMTpro_zero [K8]; 1xTMTpro_zero [N-Term]	0	0.001947	1	-0.73445	21.8918	-3.84162	0.00953713	0.136294	-2.49349	724	1	FALSE
NAVEEYVYEMR	Q61316	1xTMTpro_zero [N-Term]	0	0.000162	3	-0.734164	19.3468	-3.07129	0.0235858	0.258236	-3.44747	725	1	FALSE
KLLDADAAYEELMK	Q9QYX7	2xTMTpro_zero [K1; K14]; 1xTMTpro_zero [N-Term]	1	3.511e-05	4	-0.73416	21.1923	-3.81621	0.00981188	0.139219	-2.52349	726	1	FALSE
IWDPIHR	Q64514	1xTMTpro_zero [N-Term]	0	0.002518	1	-0.733925	21.8717	-2.08124	0.0853514	0.571927	-4.77009	727	1	FALSE
GFEVVYMTEPIDEYCVQQLK	P11499	1xCarbamidomethyl [C15]; 1xTMTpro_zero [K20]; 1xTMTpro_zero [N-Term]	0	3.511e-05	4	-0.733651	22.2481	-4.50788	0.00468916	0.0902695	-1.74501	728	1	FALSE
ISVYSIMGGSIDGLR	Q3UPL0	1xTMTpro_zero [N-Term]	0	0.0001288	1	-0.733558	19.1613	-4.09468	0.00722645	0.115898	-2.20062	729	1	FALSE
NMYNWLLQNPK	Q80TZ3	1xTMTpro_zero [K11]; 1xTMTpro_zero [N-Term]	0	6.323e-05	0	-0.732861	21.4986	-3.67783	0.0114731	0.155484	-2.68864	730	1	FALSE
HVLVILTDMSSYAEALR	P62814	1xTMTpro_zero [N-Term]	0	3.511e-05	2	-0.729195	21.9604	-0.605273	0.568434	0.999197	-6.41342	731	1	FALSE
VMSQEIQEQLHK	Q9JHU4	1xTMTpro_zero [K12]; 1xTMTpro_zero [N-Term]	0	3.511e-05	2	-0.72918	23.6049	-4.43701	0.00504135	0.0947297	-1.82117	732	1	FALSE
IIQEQDAGLDALSSIISR	O88983	1xTMTpro_zero [N-Term]	0	3.511e-05	3	-0.728961	20.1566	-1.11584	0.309577	0.923318	-5.96917	733	1	FALSE
IGEHTPSALAIMENANVLAR	P05064	1xTMTpro_zero [N-Term]	0	3.511e-05	2	-0.728938	25.0007	-4.00972	0.0079233	0.121137	-2.29777	734	1	FALSE
ICDPGLTAFEPEALGNLVEGMDFHR	Q6PHZ2	1xCarbamidomethyl [C2]; 1xTMTpro_zero [N-Term]	0	3.511e-05	5	-0.728389	21.4114	-4.10244	0.00716634	0.1152	-2.1918	735	1	FALSE
GLAFIQDPDGYWIEILNPNK	Q9CPU0	1xTMTpro_zero [K20]; 1xTMTpro_zero [N-Term]	0	0.0002306	3	-0.727335	20.7148	-1.84541	0.117417	0.668036	-5.08464	736	1	FALSE
YDDMAAAMK	P61982; Q9CQV8	1xTMTpro_zero [K9]; 1xTMTpro_zero [N-Term]	0	0.0001288	2	-0.727171	21.3965	-1.33436	0.233215	0.860175	-5.72595	737	1	FALSE
MSINAEDVVVGDLVEVK	Q8VDN2	1xOxidation [M1]; 1xTMTpro_zero [K17]; 1xTMTpro_zero [N-Term]	0	3.511e-05	4	-0.726216	23.0231	-1.67446	0.147988	0.736233	-5.30725	738	1	FALSE
YVEDTDGSSPEDLMAVLTGAEEK	Q9ES97	1xTMTpro_zero [K23]; 1xTMTpro_zero [N-Term]	0	3.511e-05	7	-0.726101	22.1401	-2.6847	0.0384261	0.350831	-3.95651	739	1	FALSE
ENEMDENLEQVSGIIGNLR	P60879	1xTMTpro_zero [N-Term]	0	3.511e-05	5	-0.725613	23.8348	-4.18147	0.0065852	0.10875	-2.1026	740	1	FALSE
GNECFQK	Q60864	1xCarbamidomethyl [C4]; 1xTMTpro_zero [K7]; 1xTMTpro_zero [N-Term]	0	0.001277	1	-0.72526	21.246	-2.82194	0.0322354	0.316326	-3.774	741	1	FALSE
NYTDNELEK	P26443	1xTMTpro_zero [K9]; 1xTMTpro_zero [N-Term]	0	3.511e-05	3	-0.725014	22.734	-1.59863	0.16393	0.770372	-5.40384	742	1	FALSE
VGDDLILVSVSSER	E9Q401	1xTMTpro_zero [N-Term]	0	3.511e-05	3	-0.724732	22.0094	-1.8082	0.123486	0.682025	-5.13358	743	1	FALSE
CIEECVEPWNDSWNDNLVDTSPLK	Q8CAA7	2xCarbamidomethyl [C1; C5]; 1xTMTpro_zero [K24]; 1xTMTpro_zero [N-Term]	0	0.0004547	6	-0.723754	20.3952	-2.49502	0.0491816	0.412965	-4.21118	744	1	FALSE
VMEALSLYTK	P70297	1xTMTpro_zero [K10]; 1xTMTpro_zero [N-Term]	0	3.511e-05	1	-0.722993	21.0421	-4.82348	0.00342565	0.0768285	-1.41564	745	1	FALSE
AETMTVSSLAIR	Q9Z2H5	1xTMTpro_zero [N-Term]	0	3.511e-05	1	-0.722784	22.795	-4.38621	0.0053123	0.0973222	-1.87627	746	1	FALSE
GLDYAEMTATTLETESSNSK	Q9EPN1	1xTMTpro_zero [K20]; 1xTMTpro_zero [N-Term]	0	3.511e-05	4	-0.722601	20.8551	-3.48436	0.0143489	0.182378	-2.92467	747	1	FALSE
VAQLALLDGPFADLGDGGCYGDLFCK	Q08460	2xCarbamidomethyl [C19; C25]; 1xTMTpro_zero [K26]; 1xTMTpro_zero [N-Term]	0	3.511e-05	4	-0.721746	21.2165	-1.53056	0.179639	0.793096	-5.48916	748	1	FALSE
VYWETGAQITSPHDKEILK	Q8CAA7	2xTMTpro_zero [K15; K19]; 1xTMTpro_zero [N-Term]	1	0.0001793	3	-0.720843	22.1906	-2.05463	0.08847	0.583852	-4.80587	749	1	FALSE
SLENVLEINK	Q62108	1xTMTpro_zero [K10]; 1xTMTpro_zero [N-Term]	0	3.511e-05	2	-0.7197	22.4614	-1.5981	0.164047	0.770372	-5.40452	750	1	FALSE
LSIPDNDLSSLPTSIASLVNLK	Q80TE7	1xTMTpro_zero [K22]; 1xTMTpro_zero [N-Term]	0	0.0001288	2	-0.718993	20.2337	-1.3844	0.218298	0.844462	-5.667	751	1	FALSE
GPVVLAEDFLDIMGQPINPQCR	P62814	1xCarbamidomethyl [C21]; 1xTMTpro_zero [N-Term]	0	3.511e-05	3	-0.718867	24.212	-4.06557	0.0074571	0.118526	-2.23377	752	1	FALSE
VQAMYIWVDGTGEGLR	P15105	1xTMTpro_zero [N-Term]	0	3.511e-05	2	-0.718817	21.7935	-3.85259	0.00942118	0.135253	-2.48058	753	1	FALSE
FEGTTSLGEVR	Q8C0E2	1xTMTpro_zero [N-Term]	0	0.0001288	2	-0.718404	23.0125	-1.36819	0.223034	0.851466	-5.68622	754	1	FALSE
VWDISGLR	Q8CIE6	1xTMTpro_zero [N-Term]	0	0.001795	1	-0.717721	20.6629	-2.65484	0.0399366	0.359896	-3.99644	755	1	FALSE
QPQTQQQQQQQQQQQGLGQQAPQQAPSQAR	O88737	1xTMTpro_zero [N-Term]	0	3.511e-05	0	-0.71474	23.035	-4.37961	0.00534869	0.0976427	-1.88346	756	1	FALSE
EPEVLSTMAIIVNK	Q6P5F9	1xTMTpro_zero [K14]; 1xTMTpro_zero [N-Term]	0	3.511e-05	2	-0.709455	20.3113	-4.31256	0.00573501	0.101389	-1.9569	757	1	FALSE
DLLLDPAWEK	O88990; P57780; Q9JI91; Q7TPR4	1xTMTpro_zero [K10]; 1xTMTpro_zero [N-Term]	0	0.0001452	3	-0.707771	22.144	-2.19549	0.0731974	0.526036	-4.61602	758	1	FALSE
TGTAEMSSILEER	Q03265	1xTMTpro_zero [N-Term]	0	3.511e-05	3	-0.707027	22.8777	-4.50695	0.00469362	0.0902695	-1.74601	759	1	FALSE
MDENQFVAVTSTNAAK	O08553; P97427; Q62188	1xTMTpro_zero [K16]; 1xTMTpro_zero [N-Term]	0	3.511e-05	2	-0.706749	26.866	-4.63995	0.00410494	0.0844366	-1.60524	760	1	FALSE
DTTQLLASEMVHLR	Q8C1B1	1xTMTpro_zero [N-Term]	0	0.0008969	2	-0.706093	19.9486	-2.50732	0.0483946	0.408577	-4.19461	761	1	FALSE
IVPHICNLLGDPNSQVR	Q80TV8	1xCarbamidomethyl [C6]; 1xTMTpro_zero [N-Term]	0	6.323e-05	1	-0.704657	21.7918	-3.4864	0.0143147	0.182131	-2.92215	762	1	FALSE
MLCAVLEPALNVK	F6SEU4	1xCarbamidomethyl [C3]; 1xTMTpro_zero [K13]; 1xTMTpro_zero [N-Term]	0	3.511e-05	1	-0.70389	22.2662	-2.50574	0.0484949	0.409175	-4.19673	763	1	FALSE
FCTLLGGTTADAMCPILEFEADRR	P51863	2xCarbamidomethyl [C2; C14]; 1xTMTpro_zero [N-Term]	1	3.511e-05	4	-0.703669	20.9678	-4.90895	0.00315374	0.0730879	-1.32914	764	1	FALSE
LDQEEMVDKPDIGSYER	Q8BPN8	1xTMTpro_zero [K9]; 1xTMTpro_zero [N-Term]	0	0.0001288	6	-0.703378	21.787	-3.45198	0.0149047	0.186861	-2.96474	765	1	FALSE
IQEMSDEVLDSNPYSR	Q8VE47	1xTMTpro_zero [N-Term]	0	3.511e-05	4	-0.702194	20.4778	-4.6268	0.00415922	0.0849251	-1.61903	766	1	FALSE
ATAVMPDGQFK	P35700	1xTMTpro_zero [K11]; 1xTMTpro_zero [N-Term]	0	0.0003531	1	-0.70054	21.4801	-3.89662	0.0089716	0.131339	-2.42895	767	1	FALSE
AYHEQLSVAEITNACFEPANQMVK	P68369; P68368	1xCarbamidomethyl [C15]; 1xTMTpro_zero [K24]; 1xTMTpro_zero [N-Term]	0	3.511e-05	3	-0.700308	26.6807	-4.26771	0.00601107	0.103363	-2.00643	768	1	FALSE
SVMDATQIAGLNCLR	Q61316	1xCarbamidomethyl [C13]; 1xTMTpro_zero [N-Term]	0	3.511e-05	1	-0.7002	20.0265	-4.63654	0.00411893	0.0844745	-1.60881	769	1	FALSE
FQQLQLQQQEK	Q9QXZ0	1xTMTpro_zero [K11]; 1xTMTpro_zero [N-Term]	0	3.511e-05	1	-0.697343	22.9538	-1.43378	0.204444	0.829995	-5.60781	770	1	FALSE
RGDGADPEGEGVTLQR	Q9Z127	1xTMTpro_zero [N-Term]	1	0.001959	4	-0.697139	19.6131	-3.40293	0.0157928	0.195364	-3.02575	771	1	FALSE
TDLLLEPYNK	Q8VDD5	1xTMTpro_zero [K10]; 1xTMTpro_zero [N-Term]	0	0.00205	2	-0.695849	19.9913	-1.79395	0.125893	0.686678	-5.15225	772	1	FALSE
EIQTIMQFGDTEIK	Q8K0U4	1xTMTpro_zero [K14]; 1xTMTpro_zero [N-Term]	0	3.511e-05	3	-0.694842	24.2035	-4.2232	0.00629998	0.106441	-2.05591	773	1	FALSE
VQPNEAVYTK	Q00612	1xTMTpro_zero [K10]; 1xTMTpro_zero [N-Term]	0	0.0006098	1	-0.693412	21.3248	-2.81341	0.0325867	0.317978	-3.78528	774	1	FALSE
GLFDEEMNEILTDPSDDTK	Q9QXS1	1xTMTpro_zero [K19]; 1xTMTpro_zero [N-Term]	0	3.511e-05	7	-0.691981	22.4168	-3.46741	0.0146369	0.185024	-2.94562	775	1	FALSE
QVQAEVPGSPIFVMR	Q5SWU9	1xTMTpro_zero [N-Term]	0	3.511e-05	1	-0.691894	20.1078	-2.87636	0.0300877	0.304493	-3.70213	776	1	FALSE
DLADELALVDVMEDK	P06151	1xTMTpro_zero [K15]; 1xTMTpro_zero [N-Term]	0	3.511e-05	6	-0.691795	23.6725	-4.22479	0.00628935	0.106391	-2.05413	777	1	FALSE
YAALANLDNIFSAGQGGDQGSGFGTTGK	Q8K2K6	1xTMTpro_zero [K28]; 1xTMTpro_zero [N-Term]	0	3.511e-05	2	-0.691532	21.2819	-1.55965	0.172757	0.784261	-5.45287	778	1	FALSE
STSLDVEPIYTFR	O55106	1xTMTpro_zero [N-Term]	0	3.511e-05	2	-0.690882	24.2152	-0.589191	0.578453	0.999197	-6.42385	779	1	FALSE
KADIGVAMGIAGSDVSK	Q6PIC6	2xTMTpro_zero [K1; K17]; 1xTMTpro_zero [N-Term]	1	3.511e-05	2	-0.690261	25.821	-4.42984	0.00507861	0.0948249	-1.82892	780	1	FALSE
LATPTYGDLNHLVSATMSGVTTSLR	Q9ERD7	1xTMTpro_zero [N-Term]	0	0.0001225	1	-0.689806	22.5222	-3.73107	0.0107992	0.14912	-2.62473	781	1	FALSE
LEHIMDLTR	Q9JHU4	1xTMTpro_zero [N-Term]	0	0.0001452	2	-0.687329	23.3157	-4.30417	0.0057855	0.101733	-1.96613	782	1	FALSE
DQPPEADGQELPLEASDPESR	Q8C078	1xTMTpro_zero [N-Term]	0	3.511e-05	7	-0.685196	22.4576	-1.53606	0.178317	0.792273	-5.48231	783	1	FALSE
AVDVFFPPEAQNDFPVAMQISEK	Q68FD5	1xTMTpro_zero [K23]; 1xTMTpro_zero [N-Term]	0	3.511e-05	4	-0.684127	23.6271	-3.80637	0.00992065	0.140475	-2.53513	784	1	FALSE
NYVMIDDISELTK	O88737	1xTMTpro_zero [K13]; 1xTMTpro_zero [N-Term]	0	3.511e-05	3	-0.683726	21.5841	-3.13663	0.0217649	0.243695	-3.36317	785	1	FALSE
VTPDTDWAHLLQDHPWLLSQSLVVKPDQLIK	Q91V92	2xTMTpro_zero [K25; K31]; 1xTMTpro_zero [N-Term]	0	0.0002996	4	-0.682608	21.794	-2.30358	0.0633516	0.482687	-4.46986	786	1	FALSE
LLEAQPQVANLLPSAAQK	Q69ZW3	1xTMTpro_zero [K18]; 1xTMTpro_zero [N-Term]	0	3.511e-05	1	-0.682338	20.7131	-1.10073	0.315576	0.923588	-5.98502	787	1	FALSE
EELSSGDSLSPDPWK	Q9QZQ1	1xTMTpro_zero [K15]; 1xTMTpro_zero [N-Term]	0	3.511e-05	4	-0.68231	21.9979	-1.2361	0.265212	0.886298	-5.83838	788	1	FALSE
SSLVSLMETFNEK	Q9WVK8	1xTMTpro_zero [K13]; 1xTMTpro_zero [N-Term]	0	3.511e-05	2	-0.682282	20.3654	-4.16836	0.0066778	0.110148	-2.11732	789	1	FALSE
NLVDSYMAIVNK	P39053	1xTMTpro_zero [K12]; 1xTMTpro_zero [N-Term]	0	3.511e-05	1	-0.681415	24.5256	-3.35512	0.0167155	0.204041	-3.08557	790	1	FALSE
EEMLEIVQAIYK	P84075	1xTMTpro_zero [K12]; 1xTMTpro_zero [N-Term]	0	3.511e-05	3	-0.681201	21.974	-3.59311	0.0126446	0.166971	-2.79127	791	1	FALSE
DHIIEVVGSSMPLIGDHQDEDK	O88935	1xTMTpro_zero [K22]; 1xTMTpro_zero [N-Term]	0	3.511e-05	6	-0.680566	23.8952	-4.02416	0.00779974	0.120239	-2.28118	792	1	FALSE
MDIVHLLETNTEPLQER	Q8C8R3	1xTMTpro_zero [N-Term]	0	3.511e-05	4	-0.680192	23.0777	-3.94109	0.00854178	0.127993	-2.37711	793	1	FALSE
NIIPFDQMTIDDLNEIFPETK	Q9DCX2	1xTMTpro_zero [K21]; 1xTMTpro_zero [N-Term]	0	3.511e-05	5	-0.679244	20.867	-4.53719	0.00455178	0.08927	-1.71375	794	1	FALSE
NVAQYNANHPDFPMQIEQLER	Q9JHU4	1xTMTpro_zero [N-Term]	0	3.511e-05	3	-0.679156	23.0093	-4.14194	0.00686895	0.112018	-2.14709	795	1	FALSE
VDKLDASESLR	Q68FD5	1xTMTpro_zero [K3]; 1xTMTpro_zero [N-Term]	1	0.001254	3	-0.677425	28.1986	-2.58905	0.0434946	0.380174	-4.08465	796	1	FALSE
TQIDHYVGIAR	Q9ES97	1xTMTpro_zero [N-Term]	0	0.0002306	1	-0.675616	24.7482	-1.92074	0.106026	0.634211	-4.98489	797	1	FALSE
LGPDDVTVDIDAIR	O08759	1xTMTpro_zero [N-Term]	0	3.511e-05	4	-0.675438	21.4323	-1.10013	0.315815	0.923588	-5.98565	798	1	FALSE
LDQWLTTMLLR	Q9DB05; P28663	1xTMTpro_zero [N-Term]	0	3.511e-05	1	-0.674768	20.4282	-3.5488	0.0133101	0.172988	-2.84539	799	1	FALSE
QGQYSPMAIEEQVAVIYAGVR	Q03265	1xTMTpro_zero [N-Term]	0	3.511e-05	2	-0.672826	21.0731	-3.90524	0.00888641	0.130798	-2.41888	800	1	FALSE
DLPQYGQK	Q8C8N2	1xTMTpro_zero [K8]; 1xTMTpro_zero [N-Term]	0	0.0009929	1	-0.672583	21.2347	-1.75409	0.132877	0.702261	-5.2043	801	1	FALSE
LSTSTMNLPK	A2AG50	1xTMTpro_zero [K10]; 1xTMTpro_zero [N-Term]	0	0.002664	0	-0.672328	19.7067	-2.34568	0.0599023	0.46559	-4.41292	802	1	FALSE
KVGEASAASR	P42859	1xTMTpro_zero [K1]; 1xTMTpro_zero [N-Term]	1	0.0005228	1	-0.672317	21.9134	-4.34107	0.00556699	0.100141	-1.92558	803	1	FALSE
EQPLDEEMK	Q6PIC6	1xOxidation [M8]; 1xTMTpro_zero [K9]; 1xTMTpro_zero [N-Term]	0	3.511e-05	4	-0.67112	21.7306	-1.64922	0.15312	0.749068	-5.33957	804	1	FALSE
YVGAGTVEFIMDSR	Q99MR8	1xTMTpro_zero [N-Term]	0	3.511e-05	2	-0.670961	23.5723	-4.60215	0.00426324	0.0861069	-1.64496	805	1	FALSE
SAYSGLQSSSYLMSAR	P08551	1xTMTpro_zero [N-Term]	0	3.511e-05	0	-0.670136	23.1514	-2.06752	0.0869457	0.577906	-4.78855	806	1	FALSE
TAVKPTPIILTDQGMDLTSLAVEAR	O88737	1xTMTpro_zero [K4]; 1xTMTpro_zero [N-Term]	0	3.511e-05	3	-0.669171	22.9237	-4.25216	0.00611022	0.104377	-2.02367	807	1	FALSE
ITQAAMETIYLCK	Q9D394	1xCarbamidomethyl [C12]; 1xTMTpro_zero [K13]; 1xTMTpro_zero [N-Term]	0	3.511e-05	1	-0.66798	21.1666	-4.62238	0.00417767	0.0851768	-1.62368	808	1	FALSE
SLAQTPGQGK	Q9QYX7	1xTMTpro_zero [K10]; 1xTMTpro_zero [N-Term]	0	3.511e-05	0	-0.667602	22.9086	-1.79794	0.125215	0.685322	-5.14703	809	1	FALSE
VYSPHVLNLTLVDLPGMTK	P39053	1xTMTpro_zero [K19]; 1xTMTpro_zero [N-Term]	0	3.511e-05	1	-0.666001	21.4578	-2.60679	0.042503	0.373817	-4.06084	810	1	FALSE
QSFTMVADTPENLR	Q61792	1xTMTpro_zero [N-Term]	0	3.511e-05	2	-0.665615	21.886	-4.50181	0.00471822	0.0906172	-1.7515	811	1	FALSE
AAVMVHQLSK	Q02248	1xTMTpro_zero [K10]; 1xTMTpro_zero [N-Term]	0	0.0002996	0	-0.665483	22.1178	-4.05492	0.00754358	0.118702	-2.24594	812	1	FALSE
GPESGPAAPLK	Q80Z38	1xTMTpro_zero [K11]; 1xTMTpro_zero [N-Term]	0	3.511e-05	1	-0.663068	22.2083	-1.98872	0.0967086	0.609303	-4.89423	813	1	FALSE
GFGFVYFQSHDAADK	Q9CX86	1xTMTpro_zero [K15]; 1xTMTpro_zero [N-Term]	0	3.511e-05	2	-0.662834	22.0392	-1.41633	0.209245	0.835331	-5.62884	814	1	FALSE
LTGSVLEDTWK	Q8VE62	1xTMTpro_zero [K11]; 1xTMTpro_zero [N-Term]	0	3.511e-05	2	-0.662757	21.767	-2.9518	0.0273639	0.288692	-3.60303	815	1	FALSE
LLDDISNGYDDTEDGGHTLGDCSYSYETTEK	P14873	1xCarbamidomethyl [C22]; 1xTMTpro_zero [K31]; 1xTMTpro_zero [N-Term]	0	3.511e-05	9	-0.662334	21.5108	-1.24528	0.262062	0.88283	-5.82807	816	1	FALSE
VDGPDVALK	Q3UPL0	1xTMTpro_zero [K9]; 1xTMTpro_zero [N-Term]	0	0.000162	2	-0.657461	22.6905	-1.35859	0.225882	0.855082	-5.69755	817	1	FALSE
TKEELEELMSDIK	O35526	2xTMTpro_zero [K2; K13]; 1xTMTpro_zero [N-Term]	1	0.001623	5	-0.657204	22.4461	-2.75765	0.034989	0.332097	-3.85927	818	1	FALSE
DHEDSSLQWSNPAQQTLYFGEK	Q99N28	1xTMTpro_zero [K22]; 1xTMTpro_zero [N-Term]	0	3.511e-05	4	-0.656001	21.4826	-1.30176	0.243423	0.867222	-5.76376	819	1	FALSE
DELANTQQK	O88447	1xTMTpro_zero [K9]; 1xTMTpro_zero [N-Term]	0	3.511e-05	2	-0.653501	23.0018	-1.9314	0.104508	0.630993	-4.97071	820	1	FALSE
ALPDMEVVGLNFSSATTPELLLK	Q9JHU4	1xTMTpro_zero [K23]; 1xTMTpro_zero [N-Term]	0	3.511e-05	3	-0.652977	22.1923	-3.24848	0.0189963	0.222156	-3.22021	821	1	FALSE
VHSDSETDDIGFIPSK	Q62108	1xTMTpro_zero [K16]; 1xTMTpro_zero [N-Term]	0	3.511e-05	4	-0.652616	23.7275	-2.92242	0.0283912	0.293517	-3.64154	822	1	FALSE
FVEVMTEYNATQSK	P61264	1xTMTpro_zero [K14]; 1xTMTpro_zero [N-Term]	0	3.511e-05	2	-0.650937	21.8936	-3.51559	0.0138347	0.177792	-2.88617	823	1	FALSE
YDVGGGER	P35235	1xTMTpro_zero [N-Term]	0	0.001456	2	-0.650627	21.9082	-2.78668	0.0337153	0.324662	-3.82072	824	1	FALSE
LHDINAQMVEDQGFLDSLR	Q9DBG3	1xTMTpro_zero [N-Term]	0	3.511e-05	4	-0.650076	23.2211	-4.0544	0.00754783	0.118702	-2.24653	825	1	FALSE
KFVEVMTEYNATQSK	P61264	2xTMTpro_zero [K1; K15]; 1xTMTpro_zero [N-Term]	1	3.511e-05	2	-0.649386	24.252	-3.83701	0.00958637	0.136851	-2.49893	826	1	FALSE
MSINAEDVVVGDLVEVK	Q8VDN2	1xTMTpro_zero [K17]; 1xTMTpro_zero [N-Term]	0	3.511e-05	4	-0.649218	23.9421	-4.23351	0.00623169	0.105544	-2.04442	827	1	FALSE
YSPEEIAMATVTALR	P05063	1xTMTpro_zero [N-Term]	0	3.511e-05	2	-0.649071	21.6279	-3.41534	0.0155627	0.193387	-3.01028	828	1	FALSE
AMDLSHDQR	Q9EPN1	1xTMTpro_zero [N-Term]	0	0.001647	2	-0.64841	19.6212	-3.94106	0.00854209	0.127993	-2.37715	829	1	FALSE
ETAQAIK	Q9CPR4; Q71LX4	1xTMTpro_zero [K7]; 1xTMTpro_zero [N-Term]	0	0.0004175	1	-0.647088	22.3799	-1.69281	0.144362	0.728802	-5.28365	830	1	FALSE
NHQGLLLMDTTFR	Q05920	1xTMTpro_zero [N-Term]	0	3.511e-05	1	-0.646406	26.374	-3.96544	0.00831639	0.125695	-2.34888	831	1	FALSE
ATVASSSQK	Q80UG5	1xTMTpro_zero [K9]; 1xTMTpro_zero [N-Term]	0	0.0001288	0	-0.646	21.2813	-1.94256	0.102941	0.626429	-4.95585	832	1	FALSE
TEPQWVPVSWVY	Q9WV34	1xTMTpro_zero [N-Term]	0	0.000162	1	-0.645177	21.8855	-4.24789	0.00613778	0.104631	-2.02842	833	1	FALSE
TVAVYSEQDTGQMHR	Q05920	1xTMTpro_zero [N-Term]	0	3.511e-05	2	-0.643585	25.8492	-4.48036	0.00482247	0.0919842	-1.77448	834	1	FALSE
LYPAFMEGIALSDPAAK	Q5SSL4	1xTMTpro_zero [K17]; 1xTMTpro_zero [N-Term]	0	3.511e-05	2	-0.642961	21.0483	-4.03087	0.00774304	0.119657	-2.27348	835	1	FALSE
QLPQLTSLELQYVSPK	Q9JLN9	1xTMTpro_zero [K16]; 1xTMTpro_zero [N-Term]	0	0.0001452	1	-0.641736	20.394	-2.52559	0.0472501	0.40283	-4.16999	836	1	FALSE
EAGGNMSIQFLGTVYK	Q91ZA3	1xTMTpro_zero [K16]; 1xTMTpro_zero [N-Term]	0	3.511e-05	1	-0.641598	23.9855	-4.29941	0.0058144	0.101733	-1.97138	837	1	FALSE
FTCPFVEK	Q6ZPQ6	1xCarbamidomethyl [C3]; 1xTMTpro_zero [K8]; 1xTMTpro_zero [N-Term]	0	0.00273	1	-0.640021	21.5857	-1.77564	0.129055	0.693934	-5.1762	838	1	FALSE
VCNEVVDTCLYK	P49443	2xCarbamidomethyl [C2; C9]; 1xTMTpro_zero [K12]; 1xTMTpro_zero [N-Term]	0	3.511e-05	2	-0.63975	20.7794	-2.868	0.0304073	0.306165	-3.71315	839	1	FALSE
YYAEMCASPGQSDTTFLEEELKK	Q8CAA7	1xCarbamidomethyl [C6]; 2xTMTpro_zero [K22; K23]; 1xTMTpro_zero [N-Term]	1	3.511e-05	5	-0.638436	21.9876	-4.14898	0.00681744	0.111818	-2.13915	840	1	FALSE
KGADIMYTGTLDCWR	P48962	1xCarbamidomethyl [C13]; 1xTMTpro_zero [K1]; 1xTMTpro_zero [N-Term]	1	0.00136	2	-0.63807	22.2336	-4.31926	0.00569501	0.101006	-1.94952	841	1	FALSE
SFGGGTGSGFTSLLMER	Q3UX10	1xTMTpro_zero [N-Term]	0	3.511e-05	1	-0.63593	23.3402	-4.18454	0.00656375	0.108654	-2.09916	842	1	FALSE
ELGDVLFQMAEVHR	Q8BKX1	1xTMTpro_zero [N-Term]	0	3.511e-05	3	-0.633373	22.9573	-4.11294	0.00708585	0.114435	-2.17989	843	1	FALSE
TETDFSNLFAQDLLPAK	P48318	1xTMTpro_zero [K17]; 1xTMTpro_zero [N-Term]	0	0.0001288	3	-0.632701	21.1237	-1.91942	0.106216	0.634616	-4.98664	844	1	FALSE
EVVDSYLPVILDMIK	Q61207	1xTMTpro_zero [K15]; 1xTMTpro_zero [N-Term]	0	3.511e-05	3	-0.631707	20.5366	-4.14872	0.00681927	0.111818	-2.13943	845	1	FALSE
QQYEQCMDLQLFYR	P16546	1xCarbamidomethyl [C6]; 1xTMTpro_zero [N-Term]	0	3.511e-05	2	-0.631004	22.1659	-4.14012	0.00688232	0.112059	-2.14914	846	1	FALSE
VNWQSYLQGQMISAEDCEFIQR	Q8BVE3	1xCarbamidomethyl [C17]; 1xTMTpro_zero [N-Term]	0	3.511e-05	3	-0.630776	20.9552	-3.26807	0.0185529	0.218625	-3.19536	847	1	FALSE
GFDPSSPVLHELTFQAMSYDLLPIENDVYK	O08599	1xTMTpro_zero [K30]; 1xTMTpro_zero [N-Term]	0	3.511e-05	5	-0.630696	22.6267	-2.93504	0.0279451	0.291518	-3.625	848	1	FALSE
EWTNEVFSLATNLLAQNMSR	Q9Z1B3	1xTMTpro_zero [N-Term]	0	3.511e-05	2	-0.629126	21.6848	-3.92428	0.00870151	0.129962	-2.39667	849	1	FALSE
FSELTSEK	P80316	1xTMTpro_zero [K8]; 1xTMTpro_zero [N-Term]	0	0.0001225	2	-0.629044	22.5401	-3.24431	0.0190923	0.222717	-3.22551	850	1	FALSE
IIEEAPAAIATPAVFEHMEQCAVK	Q5SWU9	1xCarbamidomethyl [C21]; 1xTMTpro_zero [K24]; 1xTMTpro_zero [N-Term]	0	3.511e-05	4	-0.628317	23.0724	-2.99181	0.0260297	0.276927	-3.55074	851	1	FALSE
EQAQSCR	P16546	1xCarbamidomethyl [C6]; 1xTMTpro_zero [N-Term]	0	0.001434	1	-0.626849	23.0923	-3.89939	0.00894415	0.13119	-2.42571	852	1	FALSE
VRPGSVLAAALAPQEATEPVRDVSWDEK	Q3UNH4	1xTMTpro_zero [K28]; 1xTMTpro_zero [N-Term]	1	3.511e-05	5	-0.626592	21.8454	-1.46828	0.195256	0.816304	-5.5659	853	1	FALSE
LEHAAALR	Q8VD04	1xTMTpro_zero [N-Term]	0	0.002464	1	-0.625902	21.9672	-2.27434	0.0658702	0.493135	-4.50942	854	1	FALSE
GLGFVLGAYQCICK	Q8C419	2xCarbamidomethyl [C11; C13]; 1xTMTpro_zero [K14]; 1xTMTpro_zero [N-Term]	0	3.511e-05	0	-0.625472	23.317	-2.63781	0.0408266	0.365745	-4.01924	855	1	FALSE
VPMNTVDFGHVTEEWR	P46096	1xTMTpro_zero [N-Term]	0	3.511e-05	3	-0.625092	23.7941	-3.00859	0.0254916	0.273293	-3.52888	856	1	FALSE
SEEMTLAQLFLQSEAAYCCVSELGELGK	Q9Z1G4	2xCarbamidomethyl [C18; C19]; 1xTMTpro_zero [K28]; 1xTMTpro_zero [N-Term]	0	3.511e-05	5	-0.624603	22.0382	-2.86957	0.0303469	0.306	-3.71108	857	1	FALSE
MIEEAGAIISTR	Q91V12	1xTMTpro_zero [N-Term]	0	3.511e-05	2	-0.624502	23.3832	-4.04314	0.00764055	0.119125	-2.25942	858	1	FALSE
FQMPDQGMTSADDFFQGTK	O08553	1xOxidation [M]; 1xTMTpro_zero [K19]; 1xTMTpro_zero [N-Term]	0	3.511e-05	3	-0.624438	26.156	-2.89794	0.0292797	0.29893	-3.67372	859	1	FALSE
GITWGEDTLMEYLENPK	P62897	1xTMTpro_zero [K17]; 1xTMTpro_zero [N-Term]	0	3.511e-05	4	-0.624311	22.278	-4.01229	0.00790114	0.121137	-2.29481	860	1	FALSE
AKLDENSAFLQFNWK	P16546	2xTMTpro_zero [K2; K15]; 1xTMTpro_zero [N-Term]	1	0.00147	2	-0.623552	25.402	-3.62432	0.0121982	0.162312	-2.75333	861	1	FALSE
STAISLFYELSENDLNFIK	P58252	1xTMTpro_zero [K19]; 1xTMTpro_zero [N-Term]	0	3.511e-05	3	-0.62347	21.8956	-0.587417	0.579565	0.999197	-6.42499	862	1	FALSE
IIEVVDAIMTTAQSHQR	Q9WUA3	1xTMTpro_zero [N-Term]	0	3.511e-05	2	-0.622958	24.5489	-3.30328	0.0177839	0.212993	-3.15081	863	1	FALSE
AEMEVLLASK	Q9QXS1	1xTMTpro_zero [K10]; 1xTMTpro_zero [N-Term]	0	3.511e-05	2	-0.622929	21.1036	-3.63645	0.0120293	0.16099	-2.73862	864	1	FALSE
EYGSTSSIDK	Q8C0T5	1xTMTpro_zero [K10]; 1xTMTpro_zero [N-Term]	0	0.0001288	2	-0.621933	21.2372	-1.86034	0.115064	0.65978	-5.06493	865	1	FALSE
LQCVFLDPASAGIGYGR	Q91YM2	1xCarbamidomethyl [C3]; 1xTMTpro_zero [N-Term]	0	9.462e-05	1	-0.620369	20.9478	-0.936186	0.38735	0.966117	-6.1481	866	1	FALSE
LPVFCQLILK	Q0GNC1	1xCarbamidomethyl [C5]; 1xTMTpro_zero [K10]; 1xTMTpro_zero [N-Term]	0	0.001434	0	-0.620137	19.4444	-1.69946	0.143071	0.727227	-5.27509	867	1	FALSE
LLAAGCGPGVLADAK	Q922R1	1xCarbamidomethyl [C6]; 1xTMTpro_zero [K15]; 1xTMTpro_zero [N-Term]	0	3.511e-05	1	-0.618766	20.1804	-1.31266	0.239967	0.867062	-5.75118	868	1	FALSE
LHLEGQQVR	Q9JMH9	1xTMTpro_zero [N-Term]	0	0.0004027	1	-0.617727	20.7236	-0.923748	0.393265	0.96998	-6.15967	869	1	FALSE
MQVNAEEVVVGDLVEIK	Q6PIC6	1xTMTpro_zero [K17]; 1xTMTpro_zero [N-Term]	0	3.511e-05	4	-0.617278	25.8861	-4.08898	0.00727099	0.116414	-2.2071	870	1	FALSE
IRDEMVATEQER	O55143	1xTMTpro_zero [N-Term]	1	0.0001452	4	-0.615319	23.3664	-3.45398	0.0148697	0.186778	-2.96226	871	1	FALSE
EGLMLDSHEELYK	Q9JHU4	1xTMTpro_zero [K13]; 1xTMTpro_zero [N-Term]	0	0.0001288	4	-0.614616	21.3309	-2.34114	0.0602643	0.467881	-4.41906	872	1	FALSE
VEPAWHDQDETSSVK	Q6ZQ58	1xTMTpro_zero [K15]; 1xTMTpro_zero [N-Term]	0	3.511e-05	4	-0.613374	21.4013	-2.63739	0.0408488	0.365745	-4.01981	873	1	FALSE
ILLAELEQLK	P20152	1xTMTpro_zero [K10]; 1xTMTpro_zero [N-Term]	0	0.000162	2	-0.612862	19.6348	-2.20896	0.0718884	0.519547	-4.59783	874	1	FALSE
YEFGIFNQK	Q9WUB3; Q8CI94	1xTMTpro_zero [K9]; 1xTMTpro_zero [N-Term]	0	0.0007929	1	-0.611905	22.6169	-3.42382	0.0154076	0.191802	-2.99972	875	1	FALSE
MALELLTQEFGIPVER	Q8BGQ7	1xTMTpro_zero [N-Term]	0	3.511e-05	3	-0.610941	20.1757	-2.55315	0.0455781	0.392022	-4.1329	876	1	FALSE
YPHYFPLLK	Q8C1A5	1xTMTpro_zero [K9]; 1xTMTpro_zero [N-Term]	0	0.0001288	0	-0.61057	21.5411	-1.81139	0.122954	0.68099	-5.12939	877	1	FALSE
DNNLELVQEILR	Q9WV34	1xTMTpro_zero [N-Term]	0	3.511e-05	3	-0.609347	23.1636	-1.10129	0.315351	0.923588	-5.98443	878	1	FALSE
AHMGMFTELAILYSK	Q68FD5	1xTMTpro_zero [K15]; 1xTMTpro_zero [N-Term]	0	3.511e-05	1	-0.609226	22.3543	-3.41089	0.0156449	0.193888	-3.01583	879	1	FALSE
LDTFCGSPPYAAPELFQGK	Q03141; Q8VHJ5; Q8CIP4; Q05512	1xCarbamidomethyl [C5]; 1xTMTpro_zero [K19]; 1xTMTpro_zero [N-Term]	0	3.511e-05	2	-0.608636	25.24	-3.35158	0.0167862	0.20421	-3.09002	880	1	FALSE
KVTLMEQLTK	Q8CAA7	2xTMTpro_zero [K1; K10]; 1xTMTpro_zero [N-Term]	1	3.511e-05	1	-0.60734	22.6464	-3.4513	0.0149166	0.186861	-2.96558	881	1	FALSE
GADEAALAR	P08551	1xTMTpro_zero [N-Term]	0	3.511e-05	2	-0.605964	24.0414	-3.76415	0.0104029	0.145088	-2.58525	882	1	FALSE
MALDIEIAAYR	P08551; P08553; P46660; P19246	1xTMTpro_zero [N-Term]	0	3.511e-05	2	-0.60565	25.0735	-3.59267	0.012651	0.166971	-2.7918	883	1	FALSE
ALANVNIGSLICNVGAGGPAPAAGAAPAGGAAPSTAAAPAEEK	P47955	1xCarbamidomethyl [C12]; 1xTMTpro_zero [K43]; 1xTMTpro_zero [N-Term]	0	3.511e-05	2	-0.605174	20.3925	-1.62532	0.158138	0.760411	-5.37002	884	1	FALSE
VMEYINR	Q68FD5	1xTMTpro_zero [N-Term]	0	0.0006613	1	-0.605114	25.808	-3.66193	0.0116834	0.157726	-2.70781	885	1	FALSE
LVVENVDVLTQMR	P28660	1xTMTpro_zero [N-Term]	0	3.511e-05	2	-0.604983	20.9783	-3.35625	0.0166931	0.203969	-3.08416	886	1	FALSE
VEFSGNPSK	Q56A07	1xTMTpro_zero [K9]; 1xTMTpro_zero [N-Term]	0	0.002138	1	-0.604872	20.1405	-1.27119	0.253362	0.87853	-5.79877	887	1	FALSE
GMTPGEAEIHFLENAK	Q9Z2H5	1xTMTpro_zero [K16]; 1xTMTpro_zero [N-Term]	0	3.511e-05	3	-0.604386	23.9205	-3.24263	0.0191313	0.222812	-3.22765	888	1	FALSE
LQGVASQSEAYLK	O88196	1xTMTpro_zero [K13]; 1xTMTpro_zero [N-Term]	0	0.0002996	1	-0.603145	20.5529	-1.50157	0.186755	0.802144	-5.52505	889	1	FALSE
VAMSHFEPSEYIR	Q99KI0	1xTMTpro_zero [N-Term]	0	6.323e-05	2	-0.603117	22.1464	-3.44846	0.0149666	0.187318	-2.96911	890	1	FALSE
LQEAMFELVTSEASYYK	Q8CHT1	1xTMTpro_zero [K17]; 1xTMTpro_zero [N-Term]	0	3.511e-05	3	-0.602921	21.0098	-1.6877	0.145362	0.731811	-5.29023	891	1	FALSE
ELIPNIPFQMLLR	Q05920	1xTMTpro_zero [N-Term]	0	3.511e-05	1	-0.602747	25.8765	-3.89598	0.00897795	0.131339	-2.4297	892	1	FALSE
LDFTVWHTAIEK	Q8BZ05	1xTMTpro_zero [K12]; 1xTMTpro_zero [N-Term]	0	0.0002306	2	-0.602584	19.8755	-2.2996	0.0636889	0.484356	-4.47525	893	1	FALSE
MQINAEEVVVGDLVEVK	Q6PIE5	1xTMTpro_zero [K17]; 1xTMTpro_zero [N-Term]	0	3.511e-05	4	-0.602304	21.4818	-3.76296	0.0104169	0.145137	-2.58666	894	1	FALSE
TTGIVMDSGDGVTHTVPIYEGYALPHAILR	P60710	1xTMTpro_zero [N-Term]	0	3.511e-05	3	-0.600306	25.2648	-3.55404	0.0132294	0.172566	-2.83898	895	1	FALSE
QTGVEPSGLGNLVGLSCVTSFR	P79621	1xCarbamidomethyl [C17]; 1xPhospho [S16]; 1xTMTpro_zero [N-Term]	0	0.001099	1	-0.60002	20.4988	-3.11344	0.0223927	0.248252	-3.39302	896	1	TRUE
RLTGGLLDR	G5E8K5	1xTMTpro_zero [N-Term]	1	0.0004027	1	-0.599998	22.8805	-2.24189	0.068788	0.508104	-4.5533	897	1	FALSE
STLMDTLFNTK	Q9R1T4; Q8C1B7	1xTMTpro_zero [K11]; 1xTMTpro_zero [N-Term]	0	3.511e-05	1	-0.596066	21.895	-2.51343	0.0480089	0.406307	-4.18638	898	1	FALSE
VAMNVYELSSAAGLPCEIDPALVVALSSQK	P28660	1xCarbamidomethyl [C16]; 1xTMTpro_zero [K30]; 1xTMTpro_zero [N-Term]	0	3.511e-05	3	-0.595965	20.6706	-2.83346	0.0317669	0.314494	-3.75875	899	1	FALSE
EGPIGGESDSEEVR	Q6NZL0	1xTMTpro_zero [N-Term]	0	3.511e-05	5	-0.595763	22.1582	-2.73399	0.0360659	0.336476	-3.89076	900	1	FALSE
LLCMCPVDFHGIFQLDER	E9Q3L2	2xCarbamidomethyl [C3; C5]; 1xTMTpro_zero [N-Term]	0	0.000162	3	-0.594625	21.0933	-4.05628	0.00753246	0.118702	-2.24438	901	1	FALSE
TATSLDLEWDNSEAEAQEYK	Q8BYI9	1xTMTpro_zero [K20]; 1xTMTpro_zero [N-Term]	0	0.0003679	6	-0.592533	20.1658	-2.3614	0.0586653	0.46035	-4.39166	902	1	FALSE
YAGEVHGMIR	E9Q3L2	1xTMTpro_zero [N-Term]	0	0.0001452	1	-0.591309	21.136	-3.15704	0.0212282	0.238817	-3.33696	903	1	FALSE
SCCSCCPAGCEK	P28184	5xCarbamidomethyl [C2; C3; C5; C6; C10]; 1xTMTpro_zero [K12]; 1xTMTpro_zero [N-Term]	0	3.511e-05	1	-0.590342	21.9993	-3.80896	0.00989183	0.14021	-2.53206	904	1	FALSE
IDDPTDSKPEDWDKPEHIPDPDAK	P14211	3xTMTpro_zero [K8; K14; K24]; 1xTMTpro_zero [N-Term]	0	0.0001288	9	-0.59033	22.0124	-1.03764	0.341688	0.938595	-6.04967	905	1	FALSE
SYSSSSGSLMPSLENLDLSQVAAISNDLK	P08551	1xTMTpro_zero [K29]; 1xTMTpro_zero [N-Term]	0	3.511e-05	3	-0.590066	21.9831	-2.85112	0.0310635	0.3103	-3.73541	906	1	FALSE
VEVWDVVDK	Q5U3K5	1xTMTpro_zero [K9]; 1xTMTpro_zero [N-Term]	0	0.001595	3	-0.589954	20.2038	-2.67295	0.039013	0.353635	-3.97221	907	1	FALSE
MVNHFIAEFK	P63017	1xTMTpro_zero [K10]; 1xTMTpro_zero [N-Term]	0	0.0001225	1	-0.587734	24.9622	-3.16223	0.0210941	0.238381	-3.3303	908	1	FALSE
LEGDMATIQVYEETSGVSVGDPVLR	P50516	1xTMTpro_zero [N-Term]	0	3.511e-05	5	-0.58766	22.3417	-2.84842	0.0311701	0.310722	-3.73898	909	1	FALSE
GQGGGGGAGEPGGAER	O88444	1xTMTpro_zero [N-Term]	0	0.0001452	2	-0.586805	19.9325	-2.43444	0.0532627	0.436171	-4.29294	910	1	FALSE
VLSAVGSAQLLMSQK	B1AZP2	1xTMTpro_zero [K15]; 1xTMTpro_zero [N-Term]	0	3.511e-05	0	-0.585736	20.1309	-2.82059	0.0322906	0.316515	-3.77578	911	1	FALSE
SSPDLTGVVHIYEELK	Q5SRX1	1xTMTpro_zero [K16]; 1xTMTpro_zero [N-Term]	0	0.0008969	3	-0.585701	20.9844	-2.42173	0.0541634	0.440077	-4.31011	912	1	FALSE
LLLAIMESR	P11881	1xTMTpro_zero [N-Term]	0	3.511e-05	1	-0.585502	21.0472	-3.8914	0.00902365	0.131638	-2.43506	913	1	FALSE
TVLIMELINNVAK	P56480	1xTMTpro_zero [K13]; 1xTMTpro_zero [N-Term]	0	3.511e-05	1	-0.584746	21.0417	-3.12399	0.0221047	0.246117	-3.37944	914	1	FALSE
AQTEWSAGTWR	Q9JKV5	1xTMTpro_zero [N-Term]	0	3.511e-05	1	-0.584187	22.3815	-3.41197	0.0156249	0.193813	-3.01449	915	1	FALSE
IVLVAMETWAADNK	Q9R1V6	1xTMTpro_zero [K14]; 1xTMTpro_zero [N-Term]	0	3.511e-05	2	-0.584103	21.4643	-3.41427	0.0155824	0.193458	-3.01161	916	1	FALSE
EVAMDDHK	Q6PIE5	1xOxidation [M4]; 1xTMTpro_zero [K8]; 1xTMTpro_zero [N-Term]	0	0.0002306	3	-0.583203	24.1684	-3.96978	0.00827686	0.12537	-2.34385	917	1	FALSE
ESSASEGADQK	D3YXK2	1xTMTpro_zero [K11]; 1xTMTpro_zero [N-Term]	0	3.511e-05	3	-0.582431	20.3934	-2.20858	0.071925	0.519547	-4.59834	918	1	FALSE
LFSSSSSPPPAK	Q9ESN9	1xPhospho [S]; 1xTMTpro_zero [K12]; 1xTMTpro_zero [N-Term]	0	0.001384	0	-0.579747	19.5562	-2.20934	0.0718518	0.519547	-4.59731	919	1	TRUE
ITDNELELYK	P55012	1xTMTpro_zero [K10]; 1xTMTpro_zero [N-Term]	0	0.0002715	3	-0.579656	21.0827	-3.41563	0.0155574	0.193387	-3.00992	920	1	FALSE
AALESQLR	P49025	1xTMTpro_zero [N-Term]	0	0.002765	1	-0.578625	21.477	-3.35284	0.016761	0.204082	-3.08843	921	1	FALSE
EDEVVVNDVDLPPWAK	Q9EPN1	1xTMTpro_zero [K16]; 1xTMTpro_zero [N-Term]	0	0.0001452	5	-0.577745	22.18	-3.33195	0.017184	0.207236	-3.11468	922	1	FALSE
NPSAQQQLVQSCK	Q71LX4	1xCarbamidomethyl [C12]; 1xTMTpro_zero [K13]; 1xTMTpro_zero [N-Term]	0	3.511e-05	0	-0.576589	21.3098	-1.48313	0.191419	0.810748	-5.54772	923	1	FALSE
IVNDDQSFYADIYMEDGLIK	O08553; Q62188	1xTMTpro_zero [K20]; 1xTMTpro_zero [N-Term]	0	3.511e-05	5	-0.575409	26.0819	-3.87731	0.00916569	0.133389	-2.45155	924	1	FALSE
IDSLMDEIAFLK	P08551	1xTMTpro_zero [K12]; 1xTMTpro_zero [N-Term]	0	3.511e-05	3	-0.575275	25.1353	-3.72037	0.010931	0.150342	-2.63754	925	1	FALSE
ELETQISELQEDLESER	Q8VDD5	1xTMTpro_zero [N-Term]	0	3.511e-05	7	-0.574821	21.4875	-1.1728	0.287822	0.905357	-5.90822	926	1	FALSE
QHLLYQQEEER	Q9QYX7	1xTMTpro_zero [N-Term]	0	3.511e-05	3	-0.574772	23.8073	-2.84897	0.0311483	0.310722	-3.73825	927	1	FALSE
GAQNADCPK	Q8C0M9	1xCarbamidomethyl [C7]; 1xTMTpro_zero [K9]; 1xTMTpro_zero [N-Term]	0	3.511e-05	1	-0.574334	24.4007	-2.97843	0.0264679	0.281158	-3.56821	928	1	FALSE
VNFHMFDVGGQR	P63094; Q8CGK7	1xTMTpro_zero [N-Term]	0	3.511e-05	1	-0.57356	20.7365	-3.10253	0.022695	0.250257	-3.40709	929	1	FALSE
LSTVASTDILATVLEEMPPFPER	P17427	1xTMTpro_zero [N-Term]	0	3.511e-05	4	-0.573055	20.6671	-3.62944	0.0121265	0.161661	-2.74711	930	1	FALSE
ITDMALEYVACDLHR	A2RT62	1xCarbamidomethyl [C11]; 1xTMTpro_zero [N-Term]	0	3.511e-05	3	-0.572509	21.3051	-2.05428	0.0885126	0.583855	-4.80635	931	1	FALSE
VISAEEALPGR	Q9D6Y7	1xTMTpro_zero [N-Term]	0	0.001993	2	-0.572427	20.5053	-2.89952	0.0292214	0.29893	-3.67164	932	1	FALSE
VLSIGEGGFWEGQVK	D3YZU1	1xTMTpro_zero [K15]; 1xTMTpro_zero [N-Term]	0	3.511e-05	2	-0.570936	22.8131	-1.80605	0.123846	0.683365	-5.13639	933	1	FALSE
VIISAPSADAPMFVMGVNHEK	P16858	1xOxidation [M]; 1xTMTpro_zero [K21]; 1xTMTpro_zero [N-Term]	0	3.511e-05	2	-0.570691	24.4708	-2.60165	0.0427878	0.375366	-4.06773	934	1	FALSE
IPEASLNFQK	Q80U49	1xTMTpro_zero [K10]; 1xTMTpro_zero [N-Term]	0	6.323e-05	1	-0.570168	22.8171	-1.64855	0.153258	0.749068	-5.34043	935	1	FALSE
DLAILLGMLDPVEK	O08709	1xTMTpro_zero [K14]; 1xTMTpro_zero [N-Term]	0	3.511e-05	3	-0.570069	19.9641	-3.9323	0.00862487	0.129095	-2.38733	936	1	FALSE
ILAEGGGAK	Q8BFR5	1xTMTpro_zero [K9]; 1xTMTpro_zero [N-Term]	0	3.511e-05	1	-0.569925	21.1754	-1.34769	0.229153	0.857014	-5.71035	937	1	FALSE
GQEHTIDELK	P20357	1xTMTpro_zero [K10]; 1xTMTpro_zero [N-Term]	0	3.511e-05	3	-0.568848	25.1152	-2.94632	0.0275524	0.289363	-3.61021	938	1	FALSE
DMTLEGDDLILEIE	Q05920	1xTMTpro_zero [N-Term]	0	3.511e-05	6	-0.568663	24.7275	-3.33469	0.0171279	0.206739	-3.11124	939	1	FALSE
QVLEPSFR	Q9D8N0	1xTMTpro_zero [N-Term]	0	0.0003679	1	-0.568397	23.094	-2.26556	0.0666466	0.497168	-4.52129	940	1	FALSE
VQLVSIMK	Q9Z0E0	1xTMTpro_zero [K8]; 1xTMTpro_zero [N-Term]	0	0.0002861	0	-0.568019	22.041	-3.01624	0.0252503	0.271919	-3.51892	941	1	FALSE
LTTPTYGDLNHLVSATMSGVTTCLR	Q7TMM9; Q9D6F9; P99024; P68372; Q9CWF2	1xCarbamidomethyl [C23]; 1xTMTpro_zero [N-Term]	0	3.511e-05	1	-0.567579	25.8829	-2.9226	0.0283851	0.293517	-3.64132	942	1	FALSE
ISPTFADAYSNMGNTLK	Q8CGY8	1xTMTpro_zero [K17]; 1xTMTpro_zero [N-Term]	0	3.511e-05	1	-0.567107	20.6402	-2.53636	0.046589	0.398658	-4.15549	943	1	FALSE
ADVGFAMGIAGTDVAK	Q6Q477; G5E829; Q9R0K7	1xTMTpro_zero [K16]; 1xTMTpro_zero [N-Term]	0	3.511e-05	2	-0.566812	21.3766	-2.93783	0.0278475	0.291142	-3.62134	944	1	FALSE
TLVMAVYDFDR	P46096	1xTMTpro_zero [N-Term]	0	3.511e-05	2	-0.565583	23.3658	-2.17709	0.0750269	0.533358	-4.64088	945	1	FALSE
ELAQFDPAR	B5TVM2	1xTMTpro_zero [N-Term]	0	0.002115	2	-0.564984	23.3229	-3.2208	0.0196435	0.226674	-3.25543	946	1	FALSE
IPVAFPTGDANSLCK	Q6PNC0	1xCarbamidomethyl [C14]; 1xTMTpro_zero [K15]; 1xTMTpro_zero [N-Term]	0	0.0002306	1	-0.564832	20.8279	-1.52657	0.180603	0.793707	-5.49412	947	1	FALSE
MALVGLGVSHSVLK	Q9DB77	1xTMTpro_zero [K14]; 1xTMTpro_zero [N-Term]	0	3.511e-05	0	-0.564488	20.6005	-3.33767	0.017067	0.206362	-3.10749	948	1	FALSE
EIMIAAQK	P19536	1xTMTpro_zero [K8]; 1xTMTpro_zero [N-Term]	0	0.0005047	1	-0.564238	21.7365	-3.51416	0.0138577	0.177924	-2.88793	949	1	FALSE
EAVGDDESVPENVLNFDDLTADALAALK	P26638	1xTMTpro_zero [K28]; 1xTMTpro_zero [N-Term]	0	3.511e-05	8	-0.561699	20.1531	-3.69203	0.0112889	0.154117	-2.67155	950	1	FALSE
GGQIDAK	Q8C8R3	1xTMTpro_zero [K7]; 1xTMTpro_zero [N-Term]	0	0.0007754	1	-0.560646	24.3705	-1.34855	0.228894	0.857014	-5.70935	951	1	FALSE
KIEDLGAAMEEALILDNK	P16546	2xTMTpro_zero [K1; K18]; 1xTMTpro_zero [N-Term]	1	3.511e-05	5	-0.560616	25.5802	-3.32247	0.0173798	0.209054	-3.12661	952	1	FALSE
GELLSSLLTEEK	Q6ZWR6	1xTMTpro_zero [K12]; 1xTMTpro_zero [N-Term]	0	3.511e-05	3	-0.560297	19.9663	-1.75355	0.132974	0.702305	-5.205	953	1	FALSE
LTDFNFLMVLGK	P68404; P20444	1xTMTpro_zero [K12]; 1xTMTpro_zero [N-Term]	0	3.511e-05	1	-0.559955	22.5188	-2.63233	0.0411174	0.366605	-4.02658	954	1	FALSE
VTDPSVAK	Q9EQQ9	1xTMTpro_zero [K8]; 1xTMTpro_zero [N-Term]	0	0.0001288	1	-0.55772	22.0327	-2.5883	0.0435371	0.380266	-4.08566	955	1	FALSE
FFTCTAIGEPESIDWYNPQGEK	O35136	1xCarbamidomethyl [C4]; 1xTMTpro_zero [K22]; 1xTMTpro_zero [N-Term]	0	3.511e-05	4	-0.557426	20.0907	-1.9333	0.104239	0.62988	-4.96818	956	1	FALSE
SHGIFPDPSK	Q9QYX7	1xTMTpro_zero [K10]; 1xTMTpro_zero [N-Term]	0	0.0001452	1	-0.556912	22.6399	-2.96985	0.026753	0.28397	-3.57942	957	1	FALSE
VVTEEIMTTTTITEK	G5E8K5	1xTMTpro_zero [K15]; 1xTMTpro_zero [N-Term]	0	3.511e-05	3	-0.554951	21.5593	-3.56119	0.0131201	0.171301	-2.83022	958	1	FALSE
ATSPSTLVSTGPSSR	P27546	1xTMTpro_zero [N-Term]	0	6.323e-05	0	-0.554794	21.9624	-1.84044	0.118209	0.669804	-5.09119	959	1	FALSE
QLAEGTAQQR	Q9QXS1	1xTMTpro_zero [N-Term]	0	3.511e-05	1	-0.554024	22.8882	-2.02982	0.0914839	0.593322	-4.83918	960	1	FALSE
NCTIVSPDAGGAK	Q9D7G0	1xCarbamidomethyl [C2]; 1xTMTpro_zero [K13]; 1xTMTpro_zero [N-Term]	0	3.511e-05	1	-0.553586	20.4698	-2.59312	0.0432646	0.3786	-4.07918	961	1	FALSE
IMNTFSVMPSPK	Q7TMM9; Q9CWF2; Q922F4	1xOxidation [M8]; 1xTMTpro_zero [K12]; 1xTMTpro_zero [N-Term]	0	3.511e-05	0	-0.552939	24.036	-1.81065	0.123078	0.681019	-5.13037	962	1	FALSE
NEAVVK	Q9JHU4	1xTMTpro_zero [K6]; 1xTMTpro_zero [N-Term]	0	0.003051	1	-0.552678	25.3429	-2.79198	0.0334882	0.323216	-3.81369	963	1	FALSE
AENTQFVK	O70252	1xTMTpro_zero [K8]; 1xTMTpro_zero [N-Term]	0	0.0001288	1	-0.552646	21.6057	-1.88153	0.111808	0.651427	-5.03691	964	1	FALSE
KASAFNSWFENAEEDLTDPVR	P16546	1xTMTpro_zero [K1]; 1xTMTpro_zero [N-Term]	1	0.001864	5	-0.552327	24.4503	-2.05667	0.0882272	0.583634	-4.80313	965	1	FALSE
AANILVGENLVCK	P05480	1xCarbamidomethyl [C12]; 1xTMTpro_zero [K13]; 1xTMTpro_zero [N-Term]	0	3.511e-05	1	-0.551671	21.0586	-2.77177	0.0343634	0.32908	-3.84052	966	1	FALSE
ATTDNSPSSK	P06837	1xTMTpro_zero [K10]; 1xTMTpro_zero [N-Term]	0	3.511e-05	1	-0.550773	24.8033	-2.73991	0.0357933	0.335833	-3.88288	967	1	FALSE
QQEQLLQLER	O88737	1xTMTpro_zero [N-Term]	0	3.511e-05	2	-0.550101	23.3336	-2.62096	0.0417283	0.369339	-4.04183	968	1	FALSE
IYLDMLNVYK	Q6P5F9	1xTMTpro_zero [K10]; 1xTMTpro_zero [N-Term]	0	0.002184	1	-0.549592	18.2357	-3.80165	0.00997324	0.141076	-2.54071	969	1	FALSE
MGVEAVIALLEATPETPACVVSLR	Q9WUA3	1xCarbamidomethyl [C19]; 1xTMTpro_zero [N-Term]	0	3.511e-05	3	-0.549314	22.4989	-3.16185	0.0211037	0.238381	-3.33078	970	1	FALSE
SFPVVFDSPRNR	Q9Z185	1xTMTpro_zero [N-Term]	1	0.001904	1	-0.546087	20.6124	-2.78288	0.033879	0.325337	-3.82575	971	1	FALSE
LTILNVCNTGDK	Q3UH66	1xCarbamidomethyl [C7]; 1xTMTpro_zero [K12]; 1xTMTpro_zero [N-Term]	0	0.001373	1	-0.545453	22.5162	-2.04328	0.0898358	0.587444	-4.82111	972	1	FALSE
FLTENVSGSPDYTDQLK	Q5FWH3	1xPhospho [Y12]; 1xTMTpro_zero [K17]; 1xTMTpro_zero [N-Term]	0	0.0002996	3	-0.544993	21.5417	-2.53928	0.0464119	0.397387	-4.15157	973	1	TRUE
HGLEVIYMIEPIDEYCVQQLK	P07901	1xCarbamidomethyl [C16]; 1xTMTpro_zero [K21]; 1xTMTpro_zero [N-Term]	0	0.0001452	4	-0.54462	20.0729	-2.91944	0.028498	0.293614	-3.64546	974	1	FALSE
ELDSITPDITPGWK	Q8CAQ8	1xTMTpro_zero [K14]; 1xTMTpro_zero [N-Term]	0	3.511e-05	3	-0.54435	22.6834	-2.20692	0.0720849	0.520156	-4.60058	975	1	FALSE
VDDSSEDKTEFTVK	Q8BGQ7	2xTMTpro_zero [K8; K14]; 1xTMTpro_zero [N-Term]	1	0.001006	5	-0.544319	23.2629	-2.46724	0.0510098	0.423701	-4.24865	976	1	FALSE
ICDELIAK	Q6Y685	1xCarbamidomethyl [C2]; 1xTMTpro_zero [K8]; 1xTMTpro_zero [N-Term]	0	0.001925	2	-0.543278	20.0281	-3.24735	0.0190225	0.222275	-3.22165	977	1	FALSE
LQVEHPVTEMITGTDLVEWQLR	Q99MR8	1xTMTpro_zero [N-Term]	0	3.511e-05	4	-0.540789	25.1011	-2.8557	0.0308839	0.309395	-3.72937	978	1	FALSE
KYQVDLSK	Q6PIE5	2xTMTpro_zero [K1; K8]; 1xTMTpro_zero [N-Term]	1	0.0005228	1	-0.540468	23.2938	-1.97246	0.098859	0.616209	-4.91596	979	1	FALSE
AGVATPGLTEDQLWR	Q91V61	1xTMTpro_zero [N-Term]	0	3.511e-05	2	-0.539462	21.4028	-1.29205	0.246543	0.870129	-5.77493	980	1	FALSE
LAALADLEDWEELEK	Q920Q4	1xTMTpro_zero [K15]; 1xTMTpro_zero [N-Term]	0	3.511e-05	6	-0.539361	20.3	-2.67109	0.0391068	0.354024	-3.9747	981	1	FALSE
DSAIQQQVANLQMK	Q9JHU4	1xTMTpro_zero [K14]; 1xTMTpro_zero [N-Term]	0	3.511e-05	1	-0.53932	21.2456	-0.944122	0.383612	0.963059	-6.14066	982	1	FALSE
EAHLAALR	O70166	1xTMTpro_zero [N-Term]	0	0.0002861	1	-0.538916	21.3117	-2.89083	0.029543	0.300949	-3.68306	983	1	FALSE
SPLMSEFQSQISSNPELAAIFESIQK	Q6ZQ38	1xTMTpro_zero [K26]; 1xTMTpro_zero [N-Term]	0	3.511e-05	3	-0.538712	22.1567	-2.03015	0.091443	0.593322	-4.83873	984	1	FALSE
EHGLIFMETSAK	P53994	1xTMTpro_zero [K12]; 1xTMTpro_zero [N-Term]	0	3.511e-05	2	-0.538613	21.1327	-3.57887	0.0128544	0.168782	-2.80863	985	1	FALSE
EALAIIGDINTATVSTPAPPPVDDSWLQHSR	Q8BZ98	1xTMTpro_zero [N-Term]	0	3.511e-05	4	-0.538007	21.027	-1.9966	0.0956836	0.607046	-4.88368	986	1	FALSE
LMLVEEELRR	F6SEU4	1xTMTpro_zero [N-Term]	1	0.0002209	3	-0.537227	22.6187	-3.59155	0.0126674	0.166971	-2.79316	987	1	FALSE
SGETEDTFIADLVVGLCTGQIK	P17182; P17183	1xCarbamidomethyl [C17]; 1xTMTpro_zero [K22]; 1xTMTpro_zero [N-Term]	0	3.511e-05	4	-0.536808	23.488	-2.95446	0.0272732	0.287953	-3.59956	988	1	FALSE
ILAVNSVGLEDVMHEDAVAALK	Q62108	1xTMTpro_zero [K22]; 1xTMTpro_zero [N-Term]	0	3.511e-05	4	-0.536789	23.4314	-3.29662	0.0179266	0.214333	-3.15923	989	1	FALSE
AVSEEIESILQSGHLDEEK	Q3TMH2	1xTMTpro_zero [K19]; 1xTMTpro_zero [N-Term]	0	0.0001288	6	-0.536553	21.5673	-3.15774	0.0212099	0.238804	-3.33605	990	1	FALSE
AAGAAPLK	O88737	1xTMTpro_zero [K8]; 1xTMTpro_zero [N-Term]	0	3.511e-05	0	-0.536125	24.6815	-2.08623	0.0847796	0.570807	-4.76338	991	1	FALSE
NITDQQK	Q9QYX7	1xTMTpro_zero [K7]; 1xTMTpro_zero [N-Term]	0	0.0002996	1	-0.535617	23.2044	-1.65586	0.151752	0.745622	-5.33108	992	1	FALSE
TLLTGDGGGESTGLPLTQGK	P97434	1xTMTpro_zero [K20]; 1xTMTpro_zero [N-Term]	0	3.511e-05	2	-0.535292	21.266	-1.86369	0.114543	0.658001	-5.0605	993	1	FALSE
FSPDLWGVSVCTVDGQR	D3Z7P3	1xCarbamidomethyl [C11]; 1xTMTpro_zero [N-Term]	0	3.511e-05	2	-0.534584	21.4303	-1.08183	0.323217	0.929146	-6.00465	994	1	FALSE
GTLDPVEK	P63017	1xTMTpro_zero [K8]; 1xTMTpro_zero [N-Term]	0	9.462e-05	2	-0.534562	27.6006	-1.96078	0.100433	0.619426	-4.93156	995	1	FALSE
FTLSCTETLMSELGNIAK	Q9R111	1xCarbamidomethyl [C5]; 1xTMTpro_zero [K18]; 1xTMTpro_zero [N-Term]	0	3.511e-05	2	-0.534118	23.2165	-2.82671	0.0320407	0.315975	-3.76768	996	1	FALSE
IELLGSYDPQK	Q9D358	1xTMTpro_zero [K11]; 1xTMTpro_zero [N-Term]	0	3.511e-05	2	-0.533063	24.4897	-1.37672	0.220531	0.847529	-5.67612	997	1	FALSE
FNSFYGDPPEELPDFSEDPTSSGLLAAER	O70589	1xTMTpro_zero [N-Term]	0	0.0001288	7	-0.532243	21.0559	-1.4974	0.187801	0.803992	-5.53018	998	1	FALSE
AQVLQLVAELEETR	Q3TVA9	1xTMTpro_zero [N-Term]	0	3.511e-05	3	-0.530708	20.451	-3.52423	0.0136959	0.176907	-2.87554	999	1	FALSE
GTGFGTGSTASGWDVEQALTK	O88738	1xTMTpro_zero [K21]; 1xTMTpro_zero [N-Term]	0	3.511e-05	2	-0.526673	20.9364	-3.25099	0.0189389	0.221676	-3.21702	1000	1	FALSE
IYPYEMLVVTNK	Q9WV69	1xTMTpro_zero [K12]; 1xTMTpro_zero [N-Term]	0	0.0002306	1	-0.526548	21.1351	-3.63649	0.0120289	0.16099	-2.73858	1001	1	FALSE
AAMIWIVGEYAER	O35643; Q9DBG3	1xTMTpro_zero [N-Term]	0	3.511e-05	2	-0.525033	20.3081	-3.69443	0.0112581	0.154078	-2.66866	1002	1	FALSE
TVFAGAVPVLPASPPPK	Q60902	1xPhospho [S13]; 1xTMTpro_zero [K17]; 1xTMTpro_zero [N-Term]	0	0.001266	0	-0.524959	19.796	-1.00243	0.357016	0.946655	-6.08463	1003	1	TRUE
GDSFVGGR	Q8BWF0	1xTMTpro_zero [N-Term]	0	0.001983	1	-0.523213	21.9661	-3.29707	0.0179169	0.214333	-3.15865	1004	1	FALSE
TKQDEVNAAWQR	P16546	1xTMTpro_zero [K2]; 1xTMTpro_zero [N-Term]	1	3.511e-05	2	-0.522404	24.6054	-1.56885	0.170633	0.780736	-5.44134	1005	1	FALSE
KTVTAMDVVYALK	P62806	2xTMTpro_zero [K1; K13]; 1xTMTpro_zero [N-Term]	1	0.0005047	1	-0.522125	22.7685	-3.36365	0.0165465	0.202892	-3.07487	1006	1	FALSE
SEMEETLTAIAEELAASAK	P08553	1xTMTpro_zero [K19]; 1xTMTpro_zero [N-Term]	0	3.511e-05	5	-0.519743	21.4581	-3.58796	0.01272	0.167492	-2.79754	1007	1	FALSE
MQHNLEQQIQAR	P16546	1xTMTpro_zero [N-Term]	0	6.323e-05	1	-0.519354	25.1531	-2.60995	0.0423286	0.372991	-4.05659	1008	1	FALSE
GVQQVTGHGGLR	Q7TMF3	1xTMTpro_zero [N-Term]	0	3.511e-05	0	-0.518452	21.6993	-1.10147	0.315279	0.923588	-5.98425	1009	1	FALSE
YVSHGATGK	P16460	1xTMTpro_zero [K9]; 1xTMTpro_zero [N-Term]	0	6.323e-05	0	-0.517316	23.7643	-3.25097	0.0189393	0.221676	-3.21705	1010	1	FALSE
ICDSVGLAK	Q8K3H0	1xCarbamidomethyl [C2]; 1xTMTpro_zero [K9]; 1xTMTpro_zero [N-Term]	0	0.0001288	1	-0.51566	21.3253	-0.807554	0.451914	0.993616	-6.26207	1011	1	FALSE
VAHMEFCYQELCQLAAER	Q62261	2xCarbamidomethyl [C7; C12]; 1xTMTpro_zero [N-Term]	0	3.511e-05	3	-0.515484	25.1915	-2.92027	0.0284682	0.293614	-3.64437	1012	1	FALSE
MTVVQAYVGDVHYK	Q9R0K7	1xTMTpro_zero [K14]; 1xTMTpro_zero [N-Term]	0	3.511e-05	1	-0.514467	22.9047	-2.28425	0.0650053	0.489997	-4.49602	1013	1	FALSE
TSVSSVSASPSR	P19246	1xTMTpro_zero [N-Term]	0	3.511e-05	0	-0.51398	23.2552	-2.84492	0.0313086	0.311184	-3.7436	1014	1	FALSE
YWEVCSFNEVLASK	Q8K394	1xCarbamidomethyl [C5]; 1xTMTpro_zero [K14]; 1xTMTpro_zero [N-Term]	0	3.511e-05	2	-0.513477	21.2816	-2.43095	0.0535081	0.437407	-4.29765	1015	1	FALSE
SPVDSSVLEGVK	Q8C437	1xTMTpro_zero [K12]; 1xTMTpro_zero [N-Term]	0	3.511e-05	2	-0.513156	23.9266	-2.74902	0.035378	0.334364	-3.87076	1016	1	FALSE
LYSSMSDTNLAEAGLNYHAQR	O88737	1xTMTpro_zero [N-Term]	0	3.511e-05	2	-0.512599	21.3332	-3.14151	0.0216352	0.242611	-3.3569	1017	1	FALSE
SPVDYGTSAGVWSQDK	P59326	1xTMTpro_zero [K16]; 1xTMTpro_zero [N-Term]	0	3.511e-05	2	-0.510738	20.6816	-1.53406	0.178796	0.792273	-5.4848	1018	1	FALSE
SIGDSVVIGDK	P11881	1xTMTpro_zero [K11]; 1xTMTpro_zero [N-Term]	0	3.511e-05	2	-0.510543	23.6	-1.47484	0.193552	0.81385	-5.55788	1019	1	FALSE
NIGNTFFK	Q9CR16	1xTMTpro_zero [K8]; 1xTMTpro_zero [N-Term]	0	0.001108	0	-0.510113	21.8062	-1.34811	0.229027	0.857014	-5.70986	1020	1	FALSE
HQGVMVGMGQK	P63268; P60710	1xOxidation [M]; 1xTMTpro_zero [K11]; 1xTMTpro_zero [N-Term]	0	3.511e-05	0	-0.50992	25.3425	-2.51633	0.0478264	0.405915	-4.18246	1021	1	FALSE
GLQVEGSEAPAC	Q8C1A5	1xCarbamidomethyl [C12]; 1xTMTpro_zero [N-Term]	0	3.511e-05	2	-0.509858	21.6619	-2.02536	0.0920363	0.59441	-4.84516	1022	1	FALSE
GSLDWPEEER	Q80U49	1xTMTpro_zero [N-Term]	0	0.0001288	4	-0.509858	21.6619	-2.02536	0.0920363	0.59441	-4.84516	1023	1	FALSE
GLNLECLWEK	Q5XJV6	1xCarbamidomethyl [C6]; 1xTMTpro_zero [K10]; 1xTMTpro_zero [N-Term]	0	0.0001793	2	-0.509417	21.1007	-2.55427	0.0455118	0.392022	-4.1314	1024	1	FALSE
QDSLNQNPVSQR	P35436	1xTMTpro_zero [N-Term]	0	0.0007754	1	-0.508626	20.6455	-2.27294	0.0659937	0.493356	-4.51132	1025	1	FALSE
ENQNFCVPCYEK	O70433	2xCarbamidomethyl [C6; C9]; 1xTMTpro_zero [K12]; 1xTMTpro_zero [N-Term]	0	0.0005402	2	-0.508366	21.0803	-2.33992	0.060362	0.468117	-4.4207	1026	1	FALSE
SFYGDLDSPLPK	Q6NZL0	1xTMTpro_zero [K12]; 1xTMTpro_zero [N-Term]	0	3.511e-05	2	-0.508357	20.3774	-1.05846	0.332878	0.933866	-6.02861	1027	1	FALSE
SWASALAAAQGCGDCGWGLAR	P27545	2xCarbamidomethyl [C12; C15]; 1xTMTpro_zero [N-Term]	0	3.511e-05	1	-0.506819	20.0984	-1.63594	0.155889	0.753997	-5.35651	1028	1	FALSE
LDEAQEAECQVLK	Q5F2E8	1xCarbamidomethyl [C9]; 1xTMTpro_zero [K13]; 1xTMTpro_zero [N-Term]	0	6.323e-05	4	-0.506279	20.4518	-1.87135	0.113362	0.65575	-5.05039	1029	1	FALSE
GFAFDCDDVNFTTDNLCFVGLMSMIDPPR	Q6PIC6	2xCarbamidomethyl [C6; C17]; 1xTMTpro_zero [N-Term]	0	3.511e-05	5	-0.506001	21.9393	-3.09767	0.0228313	0.251361	-3.41337	1030	1	FALSE
AEVMADTAVALASGNVK	Q04690	1xTMTpro_zero [K17]; 1xTMTpro_zero [N-Term]	0	3.511e-05	2	-0.503286	20.7193	-1.47717	0.19295	0.81321	-5.55503	1031	1	FALSE
GTPLYGQPSWWGDAEEDEQR	Q6A065	1xTMTpro_zero [N-Term]	0	3.511e-05	5	-0.50307	21.3641	-2.7125	0.0370752	0.343229	-3.9194	1032	1	FALSE
GVILPIWEPQDPSFGDK	P70414	1xTMTpro_zero [K17]; 1xTMTpro_zero [N-Term]	0	0.0004175	3	-0.502804	21.0084	-2.68708	0.0383083	0.350032	-3.95333	1033	1	FALSE
LEDAADVYR	Q80UM3	1xTMTpro_zero [N-Term]	0	0.002178	3	-0.502337	21.7772	-2.43608	0.0531476	0.435741	-4.29073	1034	1	FALSE
VLDLQQIK	Q9WVJ2	1xTMTpro_zero [K8]; 1xTMTpro_zero [N-Term]	0	0.00189	1	-0.501998	21.3384	-1.45136	0.199712	0.822325	-5.5865	1035	1	FALSE
VQQIQLLGR	Q8BH60	1xTMTpro_zero [N-Term]	0	0.001637	0	-0.501793	21.4249	-2.67884	0.0387175	0.351874	-3.96434	1036	1	FALSE
ITGEMVLSFPAGITR	Q8VD37	1xTMTpro_zero [N-Term]	0	0.0006098	1	-0.501219	19.609	-1.89456	0.109853	0.644553	-5.01965	1037	1	FALSE
GEVLISR	P84091	1xTMTpro_zero [N-Term]	0	0.0005228	1	-0.501095	25.711	-1.07066	0.327806	0.932405	-6.01615	1038	1	FALSE
SISQTVTGRPLQAPPTSAAQAPAQGLSK	Q9QYX7	1xTMTpro_zero [K28]; 1xTMTpro_zero [N-Term]	0	0.0001225	0	-0.500893	21.4647	-2.6823	0.0385453	0.351688	-3.95972	1039	1	FALSE
SASPDAAGK	G5E8K5	1xTMTpro_zero [K9]; 1xTMTpro_zero [N-Term]	0	3.511e-05	1	-0.499329	22.8793	-2.56865	0.0446655	0.386962	-4.11205	1040	1	FALSE
NEQEEQEEKR	Q2M3X8	1xTMTpro_zero [K9]; 1xTMTpro_zero [N-Term]	1	3.511e-05	5	-0.499099	22.174	-2.8735	0.0301967	0.305371	-3.7059	1041	1	FALSE
EQVVTPPAASDIPADSPAPAPPGPTGSAGPPGPPGPR	Q8VD37	1xTMTpro_zero [N-Term]	0	3.511e-05	3	-0.498038	21.2744	-1.47196	0.194298	0.814595	-5.5614	1042	1	FALSE
ETIELTEDGKPLEVPEK	Q8BLE7	2xTMTpro_zero [K10; K17]; 1xTMTpro_zero [N-Term]	0	0.0001452	6	-0.497816	22.8853	-1.27122	0.253351	0.87853	-5.79873	1043	1	FALSE
QDEVNAAWQR	P16546	1xTMTpro_zero [N-Term]	0	3.511e-05	2	-0.497585	24.4417	-3.22875	0.0194551	0.225466	-3.2453	1044	1	FALSE
NSEELGNTEEK	Q61481	1xTMTpro_zero [K11]; 1xTMTpro_zero [N-Term]	0	3.511e-05	4	-0.497239	23.5223	-2.56513	0.0448714	0.3877	-4.11679	1045	1	FALSE
LTIAFQAK	Q91W50	1xTMTpro_zero [K8]; 1xTMTpro_zero [N-Term]	0	0.000162	0	-0.496664	22.1753	-1.61033	0.161366	0.76606	-5.38904	1046	1	FALSE
QDMLALQIIDLFK	E9Q3L2	1xTMTpro_zero [K13]; 1xTMTpro_zero [N-Term]	0	3.511e-05	2	-0.496021	19.5132	-2.81787	0.0324023	0.3168	-3.77937	1047	1	FALSE
DAEEWFFTK	Q6IFX2	1xTMTpro_zero [K9]; 1xTMTpro_zero [N-Term]	0	0.0007754	3	-0.495825	21.7164	-3.19116	0.0203633	0.233047	-3.29326	1048	1	FALSE
EQLTQDLQEAR	Q8VD04	1xTMTpro_zero [N-Term]	0	3.511e-05	3	-0.495307	21.9066	-1.9543	0.101317	0.621718	-4.94019	1049	1	FALSE
IEEPSIDCHEFEELFSK	Q9JL04	1xCarbamidomethyl [C8]; 1xTMTpro_zero [K17]; 1xTMTpro_zero [N-Term]	0	6.323e-05	6	-0.495058	20.9824	-1.53847	0.177741	0.792146	-5.47931	1050	1	FALSE
EINNAHAILTDATK	P60904	1xTMTpro_zero [K14]; 1xTMTpro_zero [N-Term]	0	3.511e-05	2	-0.493955	24.8034	-1.07009	0.32804	0.932405	-6.01673	1051	1	FALSE
AIAHYEQSADYYK	Q9DB05; P28663	1xTMTpro_zero [K13]; 1xTMTpro_zero [N-Term]	0	3.511e-05	2	-0.49385	21.183	-1.00989	0.353723	0.945506	-6.07729	1052	1	FALSE
ALGQNPTNAEVLK	Q8CI43	1xTMTpro_zero [K13]; 1xTMTpro_zero [N-Term]	0	0.0001225	1	-0.49345	23.9668	-2.46681	0.0510392	0.423701	-4.24924	1053	1	FALSE
VIHDNFGIVEGLMTTVHAITATQK	P16858	1xTMTpro_zero [K24]; 1xTMTpro_zero [N-Term]	0	3.511e-05	2	-0.492711	26.6051	-2.87635	0.030088	0.304493	-3.70214	1054	1	FALSE
YREPPPTPPGYVGIPIADFPEGPCHPAR	Q8CHG7	1xCarbamidomethyl [C24]; 1xTMTpro_zero [N-Term]	1	0.0001452	3	-0.492104	22.6057	-1.53058	0.179633	0.793096	-5.48913	1055	1	FALSE
IHYLDTTTLIEPAPR	P47941	1xTMTpro_zero [N-Term]	0	3.511e-05	2	-0.491749	21.8379	-1.69513	0.143911	0.728141	-5.28067	1056	1	FALSE
SPACFTLQELK	P46061	1xCarbamidomethyl [C4]; 1xTMTpro_zero [K11]; 1xTMTpro_zero [N-Term]	0	0.0001225	1	-0.491445	20.3799	-1.77225	0.129649	0.694975	-5.18063	1057	1	FALSE
EEFVQWVELLPDAQTPSWLGLPNNAER	Q9JHU4	1xTMTpro_zero [N-Term]	0	3.511e-05	5	-0.490128	20.5201	-1.53347	0.178938	0.792653	-5.48554	1058	1	FALSE
TVAIPSGESQINQIALNPTGTFLYAASGNAVR	Q9QXL2	1xTMTpro_zero [N-Term]	0	0.002765	1	-0.489439	20.2243	-1.95719	0.100922	0.620662	-4.93634	1059	1	FALSE
CLAENAVYLCDR	P70398	2xCarbamidomethyl [C1; C10]; 1xTMTpro_zero [N-Term]	0	0.0001288	2	-0.489107	21.5429	-1.59229	0.165336	0.773814	-5.41185	1060	1	FALSE
VVEILHK	Q8BGQ1	1xTMTpro_zero [K7]; 1xTMTpro_zero [N-Term]	0	0.0001288	1	-0.487617	21.1692	-1.8937	0.109981	0.644722	-5.02078	1061	1	FALSE
EQADYCVSHMKPYVDGK	P16546	1xCarbamidomethyl [C6]; 2xTMTpro_zero [K11; K17]; 1xTMTpro_zero [N-Term]	0	3.511e-05	3	-0.486774	23.1839	-1.14463	0.29841	0.913697	-5.9386	1062	1	FALSE
IEDLGAAMEEALILDNK	P16546	1xTMTpro_zero [K17]; 1xTMTpro_zero [N-Term]	0	3.511e-05	5	-0.486533	22.6877	-3.15286	0.0213368	0.239845	-3.34232	1063	1	FALSE
DVYSTDYYR	P15209	1xTMTpro_zero [N-Term]	0	3.511e-05	2	-0.486304	22.2272	-2.0244	0.0921558	0.594733	-4.84644	1064	1	FALSE
EVDEQMLSVQSK	Q9D6F9	1xOxidation [M6]; 1xTMTpro_zero [K12]; 1xTMTpro_zero [N-Term]	0	3.511e-05	3	-0.486186	24.5495	-0.918391	0.395835	0.971127	-6.16462	1065	1	FALSE
VVDLMAYMASK	P16858	1xOxidation [M]; 1xTMTpro_zero [K11]; 1xTMTpro_zero [N-Term]	0	0.0001288	1	-0.485828	23.6367	-1.28465	0.248941	0.873022	-5.78341	1066	1	FALSE
TMLESLIADK	Q7TMB8; Q5SQX6	1xTMTpro_zero [K10]; 1xTMTpro_zero [N-Term]	0	0.000162	2	-0.48496	21.1973	-2.2178	0.0710422	0.517094	-4.58588	1067	1	FALSE
QVEVTVHK	Q9QXS1	1xTMTpro_zero [K8]; 1xTMTpro_zero [N-Term]	0	3.511e-05	1	-0.484416	22.7138	-1.83854	0.118514	0.670986	-5.09369	1068	1	FALSE
TICAILENYQAEK	P26638	1xCarbamidomethyl [C3]; 1xTMTpro_zero [K13]; 1xTMTpro_zero [N-Term]	0	6.323e-05	2	-0.483493	20.6069	-2.44865	0.0522736	0.431028	-4.27374	1069	1	FALSE
TLAGDVHIVR	Q9QZ88	1xTMTpro_zero [N-Term]	0	3.511e-05	1	-0.483149	23.3397	-1.14408	0.29862	0.913802	-5.93918	1070	1	FALSE
IGHAHSGMGK	Q64332	1xTMTpro_zero [K10]; 1xTMTpro_zero [N-Term]	0	0.001654	0	-0.482735	21.1271	-2.74058	0.0357626	0.335833	-3.88199	1071	1	FALSE
FFAPAILTPK	Q9Z268	1xTMTpro_zero [K10]; 1xTMTpro_zero [N-Term]	0	0.0001288	0	-0.482611	21.2042	-1.0868	0.321192	0.927833	-5.99951	1072	1	FALSE
WQAFQAVVSEQR	P15508	1xTMTpro_zero [N-Term]	0	3.511e-05	1	-0.482567	19.8643	-1.77388	0.129363	0.694872	-5.1785	1073	1	FALSE
VNETEVK	P20357	1xTMTpro_zero [K7]; 1xTMTpro_zero [N-Term]	0	0.0002861	2	-0.48182	27.5685	-1.70746	0.141531	0.724234	-5.26476	1074	1	FALSE
AGSATVLSGSIAGLEGGSQLALR	Q9JMH9	1xTMTpro_zero [N-Term]	0	0.0001452	1	-0.481099	20.6518	-1.24936	0.260676	0.882247	-5.82348	1075	1	FALSE
ALGYFAVVTGK	P58281	1xTMTpro_zero [K11]; 1xTMTpro_zero [N-Term]	0	3.511e-05	0	-0.480339	20.9828	-3.22485	0.0195472	0.225938	-3.25027	1076	1	FALSE
SPVGDTGLGK	P58871	1xTMTpro_zero [K10]; 1xTMTpro_zero [N-Term]	0	3.511e-05	1	-0.479966	22.4224	-2.35163	0.0594305	0.463999	-4.40487	1077	1	FALSE
GESAMLVENTKEEVIVR	Q99P72	1xTMTpro_zero [K11]; 1xTMTpro_zero [N-Term]	1	0.001254	4	-0.479938	22.7085	-2.04274	0.0899015	0.587444	-4.82184	1078	1	FALSE
FDSLTDLVEHYK	P35235	1xTMTpro_zero [K12]; 1xTMTpro_zero [N-Term]	0	0.0001225	3	-0.479702	22.1146	-0.620949	0.558771	0.999197	-6.40301	1079	1	FALSE
FQEHLQLQNLGINPANIGFSTLTMESDK	Q68FD5	1xTMTpro_zero [K28]; 1xTMTpro_zero [N-Term]	0	3.511e-05	3	-0.479613	25.6337	-3.06373	0.0238072	0.259516	-3.45726	1080	1	FALSE
LLGNTFVALSDLR	Q9Z1R2	1xTMTpro_zero [N-Term]	0	3.511e-05	1	-0.478479	20.497	-0.819996	0.445341	0.992478	-6.25161	1081	1	FALSE
GEVLEGSNAYYCEK	B1AY13	1xCarbamidomethyl [C12]; 1xTMTpro_zero [K14]; 1xTMTpro_zero [N-Term]	0	0.0001288	3	-0.478027	20.3924	-0.573772	0.588159	0.999197	-6.43362	1082	1	FALSE
LEAELAAHEPAIQGVLDTGKK	P16546	2xTMTpro_zero [K20; K21]; 1xTMTpro_zero [N-Term]	1	0.0003679	4	-0.477713	24.0818	-2.05304	0.0886606	0.584555	-4.80801	1083	1	FALSE
LNWLSVDFNNWK	Q9R0Q7	1xTMTpro_zero [K12]; 1xTMTpro_zero [N-Term]	0	0.00114	1	-0.477704	19.7582	-2.61834	0.04187	0.37021	-4.04533	1084	1	FALSE
QIQFADDMQEFTK	Q80SW1	1xTMTpro_zero [K13]; 1xTMTpro_zero [N-Term]	0	3.511e-05	3	-0.477379	21.3597	-1.32961	0.234679	0.861904	-5.73149	1085	1	FALSE
SNLDITVGSR	E9Q3L2	1xTMTpro_zero [N-Term]	0	0.0008394	1	-0.477177	23.7439	-1.74014	0.135408	0.708565	-5.22243	1086	1	FALSE
DCPSGQLDAAGFQK	Q8BNY6	1xCarbamidomethyl [C2]; 1xTMTpro_zero [K14]; 1xTMTpro_zero [N-Term]	0	6.323e-05	2	-0.476894	20.2145	-3.23048	0.0194144	0.225466	-3.2431	1087	1	FALSE
VETGVLKPGMVVTFAPVNVTTEVK	P10126	2xTMTpro_zero [K7; K24]; 1xTMTpro_zero [N-Term]	0	3.511e-05	2	-0.476492	23.9763	-2.67344	0.0389884	0.353635	-3.97156	1088	1	FALSE
QVWLLFEYPESSGPAR	P63141	1xTMTpro_zero [N-Term]	0	3.511e-05	2	-0.476226	21.4072	-3.02683	0.0249204	0.269245	-3.50515	1089	1	FALSE
YGDTVASLQAWLEDAEK	Q6ZWR6	1xTMTpro_zero [K17]; 1xTMTpro_zero [N-Term]	0	0.0001793	4	-0.476221	19.97	-3.16631	0.0209893	0.237668	-3.32507	1090	1	FALSE
MTLVASEDYGDTLAAIQGLLK	P16546	1xTMTpro_zero [K21]; 1xTMTpro_zero [N-Term]	0	3.511e-05	3	-0.475503	24.6657	-2.99187	0.0260278	0.276927	-3.55067	1091	1	FALSE
IVYGHLDDPANQEIER	Q99KI0	1xTMTpro_zero [N-Term]	0	3.511e-05	4	-0.475487	24.7065	-2.55129	0.0456892	0.392408	-4.13541	1092	1	FALSE
LQVEHPVTECITGLDLVQEMILVAK	Q91ZA3	1xCarbamidomethyl [C10]; 1xTMTpro_zero [K25]; 1xTMTpro_zero [N-Term]	0	3.511e-05	4	-0.47545	26.3689	-2.82703	0.0320276	0.315975	-3.76726	1093	1	FALSE
KSSENLSLDDCNK	A2AG50	1xCarbamidomethyl [C11]; 2xTMTpro_zero [K1; K13]; 1xTMTpro_zero [N-Term]	1	3.511e-05	3	-0.475411	21.762	-3.04101	0.0244859	0.265168	-3.48672	1094	1	FALSE
TVSAVCSLAWHIR	Q80T69	1xCarbamidomethyl [C6]; 1xTMTpro_zero [N-Term]	0	0.002184	0	-0.475214	24.1561	-3.04277	0.0244325	0.264797	-3.48444	1095	1	FALSE
GTDDSPK	Q8CCT4	1xTMTpro_zero [K7]; 1xTMTpro_zero [N-Term]	0	0.001692	2	-0.474759	22.7618	-1.67475	0.14793	0.736215	-5.30688	1096	1	FALSE
AEEVILAEDETDVEQR	P97445	1xTMTpro_zero [N-Term]	0	3.511e-05	7	-0.474699	20.8568	-2.33232	0.0609746	0.471541	-4.43098	1097	1	FALSE
IDQESQEAALTETHK	Q9JL04	1xTMTpro_zero [K15]; 1xTMTpro_zero [N-Term]	0	3.511e-05	4	-0.473907	22.097	-1.75063	0.1335	0.703419	-5.2088	1098	1	FALSE
ILLANFLAQTEALMK	P06745	1xTMTpro_zero [K15]; 1xTMTpro_zero [N-Term]	0	3.511e-05	1	-0.473642	20.035	-1.68697	0.145507	0.732011	-5.29117	1099	1	FALSE
AAPSTADEGWDNQNW	Q9EPJ9	1xTMTpro_zero [N-Term]	0	0.0003679	3	-0.473423	22.9011	-3.06347	0.0238147	0.259516	-3.45759	1100	1	FALSE
GIHDADAEAR	Q8BRT1	1xTMTpro_zero [N-Term]	0	0.002318	3	-0.47334	21.4894	-2.8341	0.0317413	0.314494	-3.75791	1101	1	FALSE
VLMEQLTSVSEELDVR	Q99104	1xTMTpro_zero [N-Term]	0	3.511e-05	4	-0.473173	22.0439	-3.11929	0.0222326	0.24692	-3.38549	1102	1	FALSE
EVCGAYLSTDWSER	Q3UUG6	1xCarbamidomethyl [C3]; 1xTMTpro_zero [N-Term]	0	3.511e-05	3	-0.472835	20.3262	-2.28047	0.0653332	0.491059	-4.50112	1103	1	FALSE
NDFMGSLSFGISELQK	P68404	1xTMTpro_zero [K16]; 1xTMTpro_zero [N-Term]	0	3.511e-05	2	-0.472433	22.2503	-2.61211	0.04221	0.372182	-4.05369	1104	1	FALSE
ASLGSDDSTQAK	P51830	1xTMTpro_zero [K12]; 1xTMTpro_zero [N-Term]	0	0.0001452	2	-0.471303	21.0011	-2.11529	0.0815251	0.558978	-4.72425	1105	1	FALSE
LSQNIAVQTDFK	Q8BFU3	1xTMTpro_zero [K12]; 1xTMTpro_zero [N-Term]	0	3.511e-05	1	-0.471262	21.3887	-1.77318	0.129486	0.694919	-5.17941	1106	1	FALSE
VGLGLGYLELPQINYK	Q9JJ28	1xTMTpro_zero [K16]; 1xTMTpro_zero [N-Term]	0	0.0002306	1	-0.470826	19.5315	-1.10905	0.312259	0.923384	-5.97631	1107	1	FALSE
EAEEEEEAEAVEYLAELPEPLLLR	Q80UW2	1xTMTpro_zero [N-Term]	0	3.511e-05	10	-0.470464	22.5085	-2.93573	0.027921	0.291518	-3.62409	1108	1	FALSE
LTSPDPEDPLSSYINANYIR	P54830	1xTMTpro_zero [N-Term]	0	3.511e-05	3	-0.469397	20.3156	-1.49272	0.188979	0.805805	-5.53594	1109	1	FALSE
QAPQASKPPAPK	Q4KMM3	2xTMTpro_zero [K7; K12]; 1xTMTpro_zero [N-Term]	0	3.511e-05	0	-0.469089	23.7232	-2.43384	0.0533047	0.436258	-4.29375	1110	1	FALSE
SPELPGVQEDEAAS	Q8VBY2	1xTMTpro_zero [N-Term]	0	0.002357	4	-0.468667	21.088	-2.76323	0.0347405	0.330724	-3.85186	1111	1	FALSE
YNVFNFQHIGGK	Q9QYS2	1xTMTpro_zero [K12]; 1xTMTpro_zero [N-Term]	0	3.511e-05	0	-0.468488	22.7465	-3.1694	0.0209101	0.237351	-3.3211	1112	1	FALSE
GMYGIENEVFLSLPCILNAR	P16125	1xCarbamidomethyl [C15]; 1xTMTpro_zero [N-Term]	0	3.511e-05	2	-0.466982	21.2311	-3.27498	0.0183992	0.217552	-3.18661	1113	1	FALSE
AEMLEIVQAIYK	Q91X97	1xTMTpro_zero [K12]; 1xTMTpro_zero [N-Term]	0	3.511e-05	2	-0.466823	21.7088	-1.89229	0.110191	0.644959	-5.02265	1114	1	FALSE
AFCDDAVGLK	Q5SVL6	1xCarbamidomethyl [C3]; 1xTMTpro_zero [K10]; 1xTMTpro_zero [N-Term]	0	3.511e-05	2	-0.465935	22.0175	-2.01844	0.0929005	0.597485	-4.85443	1115	1	FALSE
AMSDDTVTAVCCTLHEVITK	O35927	2xCarbamidomethyl [C11; C12]; 1xTMTpro_zero [K20]; 1xTMTpro_zero [N-Term]	0	3.511e-05	3	-0.465051	21.228	-1.79975	0.124908	0.685322	-5.14466	1116	1	FALSE
IEDGNNFGVAVQEK	P97371	1xTMTpro_zero [K14]; 1xTMTpro_zero [N-Term]	0	3.511e-05	3	-0.46462	20.8088	-2.62513	0.0415029	0.368526	-4.03623	1117	1	FALSE
APTIQPQHSHEAVR	Q3TY60	1xTMTpro_zero [N-Term]	0	3.511e-05	1	-0.463203	22.7343	-1.92995	0.104713	0.631412	-4.97264	1118	1	FALSE
TVLELQYVLDK	Q60865	1xTMTpro_zero [K11]; 1xTMTpro_zero [N-Term]	0	3.511e-05	2	-0.463126	22.7685	-1.21683	0.271922	0.893001	-5.85986	1119	1	FALSE
ATPEPSGTPSSDTVSR	O89053	1xTMTpro_zero [N-Term]	0	3.511e-05	2	-0.463082	23.0291	-1.56029	0.172607	0.783835	-5.45206	1120	1	FALSE
KPASVSPTTPTSPTEGEAS	Q8R1Q8	1xTMTpro_zero [K1]; 1xTMTpro_zero [N-Term]	0	0.0002306	2	-0.462732	21.5116	-2.62923	0.0412831	0.367269	-4.03074	1121	1	FALSE
VGFGNLEDEFWLGLDNIHR	Q8BYI9	1xTMTpro_zero [N-Term]	0	3.511e-05	4	-0.462604	22.2433	-2.28119	0.065271	0.491059	-4.50015	1122	1	FALSE
VSLLDDTVYECVVEK	P48193	1xCarbamidomethyl [C11]; 1xTMTpro_zero [K15]; 1xTMTpro_zero [N-Term]	0	0.001006	4	-0.462497	19.6311	-0.945754	0.382847	0.962937	-6.13912	1123	1	FALSE
AIMAQLPQEEK	Q61301	1xTMTpro_zero [K11]; 1xTMTpro_zero [N-Term]	0	0.0001288	2	-0.462043	20.4646	-1.84356	0.117711	0.668617	-5.08708	1124	1	FALSE
LITAIGDVVNHDPAVGDR	Q9WUB3	1xTMTpro_zero [N-Term]	0	3.511e-05	3	-0.461782	21.6596	-1.28155	0.249952	0.874518	-5.78695	1125	1	FALSE
TIEGTAR	P70414	1xTMTpro_zero [N-Term]	0	0.000767	1	-0.461427	23.7881	-1.50718	0.185358	0.800434	-5.51812	1126	1	FALSE
NVNPNWSVNVK	Q9JLM8	1xTMTpro_zero [K11]; 1xTMTpro_zero [N-Term]	0	3.511e-05	0	-0.460167	24.2046	-2.29676	0.0639298	0.485011	-4.47909	1127	1	FALSE
INNFSADIK	Q99K51	1xTMTpro_zero [K9]; 1xTMTpro_zero [N-Term]	0	0.0002861	1	-0.459666	20.1102	-3.0088	0.025485	0.273293	-3.52861	1128	1	FALSE
MCDPGMTAFEPEALGNLVEGLDFHR	P11798	1xCarbamidomethyl [C2]; 1xOxidation [M]; 1xTMTpro_zero [N-Term]	0	3.511e-05	5	-0.459465	23.8065	-2.13966	0.078896	0.549371	-4.6914	1129	1	FALSE
ILDAELEAELEK	Q8R1T1	1xTMTpro_zero [K12]; 1xTMTpro_zero [N-Term]	0	3.511e-05	5	-0.458322	19.7448	-0.931348	0.389643	0.967496	-6.15261	1130	1	FALSE
TKYSLEYYMGLAEELVR	Q05920	1xTMTpro_zero [K2]; 1xTMTpro_zero [N-Term]	1	0.0002306	3	-0.457978	21.9058	-2.76954	0.0344615	0.329338	-3.84348	1131	1	FALSE
AIVDSVAVEEQER	Q6ZQ18	1xTMTpro_zero [N-Term]	0	3.511e-05	4	-0.457912	21.9489	-1.58448	0.167082	0.778078	-5.42169	1132	1	FALSE
AALAGGTTMIIDHVVPEPGTSLLAAFDQWR	O08553	1xTMTpro_zero [N-Term]	0	3.511e-05	3	-0.45772	26.1561	-2.63171	0.0411505	0.366605	-4.02742	1133	1	FALSE
NEPEPEQPIPR	Q69Z98	1xTMTpro_zero [N-Term]	0	0.0001793	3	-0.457714	21.7241	-2.03579	0.0907491	0.590485	-4.83117	1134	1	FALSE
GGEPPGDTFAPFHGYSK	F6SEU4	1xTMTpro_zero [K17]; 1xTMTpro_zero [N-Term]	0	0.0004175	2	-0.457041	21.2187	-1.8926	0.110145	0.644959	-5.02224	1135	1	FALSE
GNWEQPQNQNQTQHK	Q80X50	1xTMTpro_zero [K15]; 1xTMTpro_zero [N-Term]	0	3.511e-05	1	-0.456895	20.5517	-3.24041	0.0191827	0.223209	-3.23047	1136	1	FALSE
WGEAGAEYVVESTGVFTTMEK	P16858	1xTMTpro_zero [K21]; 1xTMTpro_zero [N-Term]	0	3.511e-05	4	-0.456887	24.9518	-2.70004	0.0376741	0.34601	-3.93602	1137	1	FALSE
VGTYVEVDMFGLPVDTR	Q9Z1B3	1xTMTpro_zero [N-Term]	0	3.511e-05	3	-0.455907	21.1503	-1.95579	0.101113	0.620806	-4.93821	1138	1	FALSE
STTNYVDFYSTK	Q68FH0	1xTMTpro_zero [K12]; 1xTMTpro_zero [N-Term]	0	0.0003356	1	-0.455502	21.0203	-2.36154	0.0586547	0.46035	-4.39147	1139	1	FALSE
GIQSSGK	Q8BJI1	1xTMTpro_zero [K7]; 1xTMTpro_zero [N-Term]	0	0.0002306	0	-0.455485	22.8649	-2.41562	0.0546019	0.440394	-4.31836	1140	1	FALSE
QCAVAK	Q8BKX1	1xCarbamidomethyl [C2]; 1xTMTpro_zero [K6]; 1xTMTpro_zero [N-Term]	0	0.00233	0	-0.455485	22.8649	-2.41562	0.0546019	0.440394	-4.31836	1141	1	FALSE
IPLDVGHR	Q8C0L9	1xTMTpro_zero [N-Term]	0	0.001729	1	-0.454488	23.2633	-2.10704	0.0824355	0.562171	-4.73536	1142	1	FALSE
MTASAASELILSK	Q80TJ1	1xTMTpro_zero [K13]; 1xTMTpro_zero [N-Term]	0	3.511e-05	1	-0.452991	22.9912	-1.05815	0.333007	0.93388	-6.02892	1143	1	FALSE
GIDEGPDGLK	Q3ULJ0	1xTMTpro_zero [K10]; 1xTMTpro_zero [N-Term]	0	0.0002512	3	-0.45288	21.0512	-1.95	0.101909	0.623148	-4.94593	1144	1	FALSE
ENFSGGTSLWQNI	Q6PHZ2	1xTMTpro_zero [N-Term]	0	3.511e-05	1	-0.452085	22.2769	-2.78358	0.0338489	0.325272	-3.82483	1145	1	FALSE
NFILDQTNVSAAAQR	Q8VEK3	1xTMTpro_zero [N-Term]	0	3.511e-05	1	-0.451727	23.393	-0.959399	0.376496	0.958505	-6.12621	1146	1	FALSE
ILSPVDSGNK	P15508	1xTMTpro_zero [K10]; 1xTMTpro_zero [N-Term]	0	0.000162	1	-0.451578	21.2797	-1.42972	0.205553	0.829995	-5.61271	1147	1	FALSE
SLDQAISR	Q5SQX6	1xTMTpro_zero [N-Term]	0	0.0001452	1	-0.451314	23.8471	-2.48914	0.0495626	0.415412	-4.21911	1148	1	FALSE
SSESELCIETPK	Q7TMY8	1xCarbamidomethyl [C7]; 1xTMTpro_zero [K12]; 1xTMTpro_zero [N-Term]	0	0.0002861	3	-0.448957	21.0704	-1.426	0.206572	0.830649	-5.6172	1149	1	FALSE
LCYVALDFEQEMATAASSSSLEK	P60710	1xCarbamidomethyl [C2]; 1xTMTpro_zero [K23]; 1xTMTpro_zero [N-Term]	0	3.511e-05	4	-0.448726	26.966	-3.1239	0.0221071	0.246117	-3.37955	1150	1	FALSE
ITTIQGPEPGALQEYEQVLVSTR	Q02357	1xTMTpro_zero [N-Term]	0	3.511e-05	3	-0.448463	19.9479	-2.00044	0.095189	0.606601	-4.87855	1151	1	FALSE
VLTFALSEEVRPQDTVSVIGGVAGGSK	Q11011	1xTMTpro_zero [K27]; 1xTMTpro_zero [N-Term]	0	3.511e-05	3	-0.448288	23.3013	-1.28312	0.249441	0.873891	-5.78516	1152	1	FALSE
IDGVEQLNNILVIGMTNRPDLIDEALLRPGR	P46460	1xTMTpro_zero [N-Term]	0	3.511e-05	5	-0.448099	23.9713	-2.15607	0.0771741	0.542158	-4.66925	1153	1	FALSE
GSTESCNTTTEDEDLKVR	Q923T9	1xCarbamidomethyl [C6]; 1xTMTpro_zero [K16]; 1xTMTpro_zero [N-Term]	1	3.511e-05	5	-0.448005	22.2099	-2.94975	0.0274345	0.288967	-3.60572	1154	1	FALSE
LINSMVAEFLK	Q9CYT6	1xTMTpro_zero [K11]; 1xTMTpro_zero [N-Term]	0	3.511e-05	1	-0.447717	21.1225	-2.00987	0.0939829	0.601599	-4.86592	1155	1	FALSE
VDQLSGEQEVLKGELEAAK	Q9ESN9	2xTMTpro_zero [K12; K19]; 1xTMTpro_zero [N-Term]	1	0.0002996	5	-0.447266	22.0325	-1.17858	0.285692	0.903965	-5.90194	1156	1	FALSE
DNLTLWTSDQQDDDGGEGNN	P61982	1xTMTpro_zero [N-Term]	0	0.0003679	6	-0.447004	24.5565	-2.86348	0.0305813	0.307472	-3.7191	1157	1	FALSE
SQWSPALTISK	P62838	1xTMTpro_zero [K11]; 1xTMTpro_zero [N-Term]	0	3.511e-05	0	-0.446863	21.9898	-2.05771	0.0881037	0.583373	-4.80174	1158	1	FALSE
VLDLSNFEILAK	O88738	1xTMTpro_zero [K12]; 1xTMTpro_zero [N-Term]	0	0.0001452	2	-0.446552	20.209	-1.99813	0.0954856	0.606965	-4.88163	1159	1	FALSE
EQEEAAAPR	Q6PGF7	1xTMTpro_zero [N-Term]	0	3.511e-05	3	-0.446406	21.8565	-2.73284	0.0361193	0.336476	-3.89229	1160	1	FALSE
FLENYDAIR	Q9JKB1	1xTMTpro_zero [N-Term]	0	0.001345	2	-0.446332	21.4106	-0.88042	0.414419	0.977541	-6.19907	1161	1	FALSE
KVQYAPERPGPQPTAETTR	Q8BWG8	1xTMTpro_zero [K1]; 1xTMTpro_zero [N-Term]	1	0.0002306	2	-0.445813	21.8248	-2.42057	0.0542461	0.440077	-4.31167	1162	1	FALSE
VIVGGVDLLAK	P28741	1xTMTpro_zero [K11]; 1xTMTpro_zero [N-Term]	0	0.0001288	1	-0.445677	19.3353	-1.75642	0.132457	0.701375	-5.20126	1163	1	FALSE
QAADMILLDDNFASIVTGVEEGR	Q8VDN2; Q6PIC6; Q6PIE5	1xTMTpro_zero [N-Term]	0	3.511e-05	5	-0.445383	25.2456	-2.73204	0.0361562	0.336476	-3.89335	1164	1	FALSE
DSLGDFIEHYAQLGPSSPEQLAAGAEEGGGPR	O35295	1xTMTpro_zero [N-Term]	0	3.511e-05	6	-0.443829	21.4983	-1.93072	0.104603	0.631024	-4.97161	1165	1	FALSE
EAEFQQMLEQLK	B1AWN6; A2APX8	1xTMTpro_zero [K12]; 1xTMTpro_zero [N-Term]	0	0.000162	3	-0.443226	22.1565	-1.61649	0.160031	0.763369	-5.38123	1166	1	FALSE
VSPQPPLSTKPSTAEPRPPAGEAQGK	O88737	2xTMTpro_zero [K10; K26]; 1xTMTpro_zero [N-Term]	0	0.0001288	2	-0.442314	25.0706	-1.78009	0.12828	0.692494	-5.17039	1167	1	FALSE
FSAVALCK	Q9R0P9	1xCarbamidomethyl [C7]; 1xTMTpro_zero [K8]; 1xTMTpro_zero [N-Term]	0	6.323e-05	0	-0.441843	25.5103	-1.53951	0.177493	0.79198	-5.47802	1168	1	FALSE
GVTSNTSDSESSSK	P70175	1xTMTpro_zero [K14]; 1xTMTpro_zero [N-Term]	0	3.511e-05	2	-0.441116	21.6454	-2.94422	0.0276252	0.28969	-3.61296	1169	1	FALSE
SQVISNAK	Q61316	1xTMTpro_zero [K8]; 1xTMTpro_zero [N-Term]	0	6.323e-05	0	-0.44106	22.8913	-1.31877	0.238049	0.866096	-5.7441	1170	1	FALSE
VTEMLVNVLNICSDDELGSEEDGFDGATAAAR	P63328	1xCarbamidomethyl [C12]; 1xTMTpro_zero [N-Term]	0	3.511e-05	8	-0.439791	23.9489	-2.81961	0.0323308	0.316515	-3.77707	1171	1	FALSE
CGLLPISPEALSLGDVAYHDYHGILVDEEEK	Q9QYC0	1xCarbamidomethyl [C1]; 1xTMTpro_zero [K31]; 1xTMTpro_zero [N-Term]	0	3.511e-05	7	-0.439382	22.5394	-1.1957	0.279456	0.898899	-5.88321	1172	1	FALSE
VIACFDSLK	Q8C181	1xCarbamidomethyl [C4]; 1xTMTpro_zero [K9]; 1xTMTpro_zero [N-Term]	0	6.323e-05	1	-0.437545	19.8746	-3.11296	0.022406	0.248252	-3.39365	1173	1	FALSE
DITEEIMSGAR	Q6NZJ6	1xTMTpro_zero [N-Term]	0	0.00205	3	-0.437204	20.9239	-2.61362	0.0421276	0.371926	-4.05167	1174	1	FALSE
ADYAQLLEDMQNAFR	P50516	1xTMTpro_zero [N-Term]	0	3.511e-05	3	-0.437059	22.8058	-2.13407	0.0794911	0.550243	-4.69894	1175	1	FALSE
VFDWIDANLNEQQIASNTLVR	Q6NZJ6	1xTMTpro_zero [N-Term]	0	0.0001288	3	-0.436651	21.7208	-1.96063	0.100453	0.619426	-4.93175	1176	1	FALSE
MVVDSAYEVIK	P16125	1xTMTpro_zero [K11]; 1xTMTpro_zero [N-Term]	0	3.511e-05	2	-0.436573	22.3903	-2.1452	0.07831	0.547461	-4.68392	1177	1	FALSE
HGVVGGVPAPWEK	Q01097	1xTMTpro_zero [K13]; 1xTMTpro_zero [N-Term]	0	3.511e-05	1	-0.43577	21.3146	-2.31271	0.0625862	0.47958	-4.45751	1178	1	FALSE
AVDVFFPPEAQNDFPVAMQISEK	Q68FD5	1xOxidation [M18]; 1xTMTpro_zero [K23]; 1xTMTpro_zero [N-Term]	0	6.323e-05	4	-0.434323	22.3174	-2.12471	0.0804987	0.553851	-4.71156	1179	1	FALSE
GYVGVVNR	Q8BZ98	1xTMTpro_zero [N-Term]	0	0.0014	0	-0.4338	23.1531	-1.79003	0.126564	0.688839	-5.15738	1180	1	FALSE
TLPTLVPAPPSAEDESAFSDDFPSSLDEDSK	Q8C8R3	1xTMTpro_zero [K31]; 1xTMTpro_zero [N-Term]	0	3.511e-05	8	-0.431706	21.9564	-1.14049	0.299996	0.913988	-5.94303	1181	1	FALSE
YEELFPAFSDSR	Q9DB05	1xTMTpro_zero [N-Term]	0	0.001099	3	-0.431584	22.4976	-1.31807	0.238268	0.866096	-5.74491	1182	1	FALSE
ISRPGDSDDSR	Q8R081	1xTMTpro_zero [N-Term]	0	0.001947	3	-0.431282	19.3496	-1.74572	0.134389	0.705164	-5.21518	1183	1	FALSE
VEEFSLPDALNEGQVQVR	Q8VDQ1	1xTMTpro_zero [N-Term]	0	3.511e-05	4	-0.431011	21.1269	-2.98089	0.0263867	0.28051	-3.565	1184	1	FALSE
IEELQLIVNDK	P62196	1xTMTpro_zero [K11]; 1xTMTpro_zero [N-Term]	0	3.511e-05	3	-0.430854	20.7173	-2.22558	0.0703055	0.514982	-4.57535	1185	1	FALSE
ADSVCDGHAAGQK	Q80YN3	1xCarbamidomethyl [C5]; 1xTMTpro_zero [K13]; 1xTMTpro_zero [N-Term]	0	3.511e-05	2	-0.430706	20.6142	-2.15831	0.0769429	0.542158	-4.66623	1186	1	FALSE
NICSLTTIQK	Q80W47	1xCarbamidomethyl [C3]; 1xTMTpro_zero [K10]; 1xTMTpro_zero [N-Term]	0	3.511e-05	0	-0.430373	22.2687	-1.52167	0.181794	0.795921	-5.5002	1187	1	FALSE
AFVHWYVGEGMEEGEFSEAR	Q9JJZ2; P68369; P68368	1xTMTpro_zero [N-Term]	0	3.511e-05	5	-0.429829	28.2567	-2.99234	0.0260126	0.276927	-3.55006	1188	1	FALSE
CSQSNNQFQK	Q5SSL4	1xCarbamidomethyl [C1]; 1xTMTpro_zero [K10]; 1xTMTpro_zero [N-Term]	0	0.0007754	0	-0.42975	20.4703	-1.73068	0.137153	0.713483	-5.23471	1189	1	FALSE
RNSPAFLSTDLGDEDVGLGPPAPR	Q80Z38	1xTMTpro_zero [N-Term]	1	0.0001288	4	-0.429612	21.0887	-1.49587	0.188185	0.804516	-5.53207	1190	1	FALSE
AIATVSENTK	O35551	1xTMTpro_zero [K10]; 1xTMTpro_zero [N-Term]	0	0.0001452	1	-0.429148	21.6549	-1.95938	0.100624	0.619651	-4.93342	1191	1	FALSE
VGLDDLPLTAVPPYR	E9Q6P5	1xTMTpro_zero [N-Term]	0	0.000162	2	-0.429069	19.8052	-0.976365	0.368716	0.953969	-6.10997	1192	1	FALSE
LVTQDNFGYDLAAVEAAK	P15508	1xTMTpro_zero [K18]; 1xTMTpro_zero [N-Term]	0	3.511e-05	3	-0.428031	22.1726	-2.21545	0.0712655	0.517465	-4.58905	1193	1	FALSE
CIDSGLWVPNSK	Q61081	1xCarbamidomethyl [C1]; 1xTMTpro_zero [K12]; 1xTMTpro_zero [N-Term]	0	0.0002861	1	-0.426227	20.9777	-1.43441	0.204273	0.829995	-5.60704	1194	1	FALSE
ATSDEVLQSDLSAHCIPK	Q80TL0	1xCarbamidomethyl [C15]; 1xTMTpro_zero [K18]; 1xTMTpro_zero [N-Term]	0	3.511e-05	3	-0.425551	21.3634	-2.93394	0.0279835	0.291687	-3.62643	1195	1	FALSE
VFLTGGDLPALDGAR	Q9WV18	1xTMTpro_zero [N-Term]	0	6.323e-05	2	-0.424782	20.8943	-1.41756	0.208902	0.834948	-5.62735	1196	1	FALSE
WVITVPAIWK	Q8K0U4	1xTMTpro_zero [K10]; 1xTMTpro_zero [N-Term]	0	3.511e-05	0	-0.424774	23.9023	-2.74083	0.0357511	0.335833	-3.88165	1197	1	FALSE
AVSEVVRPASTPPIMASAIKDEDDEER	Q9QWI6	1xTMTpro_zero [K20]; 1xTMTpro_zero [N-Term]	1	3.511e-05	7	-0.424573	23.5172	-2.86497	0.0305238	0.307115	-3.71714	1198	1	FALSE
SQDPGAVVLGK	P70704	1xTMTpro_zero [K11]; 1xTMTpro_zero [N-Term]	0	0.0001288	1	-0.424521	21.9678	-0.869462	0.419904	0.978232	-6.20881	1199	1	FALSE
QYEQQTYQVIPEVIK	Q8QZY1	1xTMTpro_zero [K15]; 1xTMTpro_zero [N-Term]	0	3.511e-05	2	-0.423755	20.7592	-2.48205	0.0500263	0.41829	-4.22867	1200	1	FALSE
RSEVDSPGDSLSWTPQPK	Q8BRV5	1xTMTpro_zero [K18]; 1xTMTpro_zero [N-Term]	1	3.511e-05	3	-0.421645	21.7156	-1.64664	0.153655	0.749673	-5.34287	1201	1	FALSE
DGLTPLHCGAR	G5E8K5	1xCarbamidomethyl [C8]; 1xTMTpro_zero [N-Term]	0	0.00102	1	-0.421434	22.1007	-2.62294	0.0416211	0.368876	-4.03917	1202	1	FALSE
DNLTLWTSENQGDEGDAGEGEN	Q9CQV8	1xTMTpro_zero [N-Term]	0	0.0004175	7	-0.41974	23.1444	-2.82384	0.0321576	0.316326	-3.77148	1203	1	FALSE
QIVSNLEK	Q61879	1xTMTpro_zero [K8]; 1xTMTpro_zero [N-Term]	0	0.0001452	1	-0.419509	22.4349	-1.90245	0.108686	0.640683	-5.00918	1204	1	FALSE
LEEAQSK	Q9Z1B3	1xTMTpro_zero [K7]; 1xTMTpro_zero [N-Term]	0	0.0003531	2	-0.418703	22.6363	-1.28659	0.248311	0.872129	-5.78119	1205	1	FALSE
EKTPLIDLCDGQAEQAAK	Q6A0A9	1xCarbamidomethyl [C9]; 2xTMTpro_zero [K2; K18]; 1xTMTpro_zero [N-Term]	1	3.511e-05	4	-0.418676	21.9858	-2.82742	0.0320115	0.315975	-3.76674	1206	1	FALSE
CIELSSGSVK	Q6PIC6	1xCarbamidomethyl [C1]; 1xTMTpro_zero [K10]; 1xTMTpro_zero [N-Term]	0	3.511e-05	1	-0.418477	26.7255	-2.54092	0.0463123	0.396779	-4.14936	1207	1	FALSE
NAGIEAQVWKPSFCFK	Q8CC35	1xCarbamidomethyl [C14]; 2xTMTpro_zero [K10; K16]; 1xTMTpro_zero [N-Term]	0	3.511e-05	1	-0.418069	22.8802	-2.82216	0.0322261	0.316326	-3.7737	1208	1	FALSE
CALGWDHQEK	Q60598	1xCarbamidomethyl [C1]; 1xTMTpro_zero [K10]; 1xTMTpro_zero [N-Term]	0	3.511e-05	2	-0.41799	21.8213	-2.798	0.0332322	0.322092	-3.8057	1209	1	FALSE
IEVEQALAHPYLEQYYDPSDEPIAEAPFK	P63085	1xTMTpro_zero [K29]; 1xTMTpro_zero [N-Term]	0	3.511e-05	7	-0.417536	21.4849	-1.16066	0.292346	0.908071	-5.92137	1210	1	FALSE
MADAIILAIAGGQELLAQTQK	Q3UPL0	1xTMTpro_zero [K21]; 1xTMTpro_zero [N-Term]	0	3.511e-05	2	-0.416077	21.2278	-2.89792	0.0292803	0.29893	-3.67374	1211	1	FALSE
ELVDQDVQPAR	Q69ZK9	1xTMTpro_zero [N-Term]	0	3.511e-05	3	-0.416033	20.6294	-1.05155	0.335781	0.934665	-6.03563	1212	1	FALSE
ELAGQHEDDSLELQGLLEDER	Q3TVA9	1xTMTpro_zero [N-Term]	0	3.511e-05	8	-0.413707	21.8488	-2.91813	0.0285448	0.293794	-3.64718	1213	1	FALSE
VEEESITK	Q922J3; Q9Z0H8	1xTMTpro_zero [K8]; 1xTMTpro_zero [N-Term]	0	0.0001288	3	-0.413276	22.0672	-2.70024	0.0376646	0.34601	-3.93576	1214	1	FALSE
VIEELSVVLQR	Q8BZ05	1xTMTpro_zero [N-Term]	0	0.0001288	2	-0.412688	19.1292	-2.55801	0.0452903	0.390429	-4.12637	1215	1	FALSE
KQHSAILAAPNPDEK	P61264	2xTMTpro_zero [K1; K15]; 1xTMTpro_zero [N-Term]	1	3.511e-05	2	-0.412625	21.3904	-1.0586	0.33282	0.933866	-6.02847	1216	1	FALSE
TFCGTPEYLAPEVLEDNDYGR	P31750	1xCarbamidomethyl [C3]; 1xTMTpro_zero [N-Term]	0	0.0005565	5	-0.412492	19.7752	-1.86523	0.114305	0.657672	-5.05847	1217	1	FALSE
ITFTGEADQAPGVEPGDIVLLLQEK	Q9QYJ0	1xTMTpro_zero [K25]; 1xTMTpro_zero [N-Term]	0	3.511e-05	5	-0.412083	22.3904	-1.35047	0.228314	0.857014	-5.70709	1218	1	FALSE
LQEEFCLIAQK	Q8BXR9	1xCarbamidomethyl [C6]; 1xTMTpro_zero [K11]; 1xTMTpro_zero [N-Term]	0	0.0001288	2	-0.411878	21.0344	-1.8078	0.123554	0.682025	-5.13411	1219	1	FALSE
ELGEYGLQAYTEVK	P47738	1xTMTpro_zero [K14]; 1xTMTpro_zero [N-Term]	0	3.511e-05	3	-0.411685	20.5065	-2.07648	0.0859014	0.573983	-4.7765	1220	1	FALSE
YSNDPVVASLAQDIFK	Q91YE6	1xTMTpro_zero [K16]; 1xTMTpro_zero [N-Term]	0	0.000162	2	-0.410924	20.8805	-2.45957	0.0515274	0.426482	-4.25901	1221	1	FALSE
LSECLQEVYEPEWPGRDEANK	O08539	1xCarbamidomethyl [C4]; 1xTMTpro_zero [K21]; 1xTMTpro_zero [N-Term]	1	0.0007754	6	-0.410875	21.0054	-1.42918	0.205701	0.829995	-5.61337	1222	1	FALSE
LWCAVGVNLSGGK	Q58A65	1xCarbamidomethyl [C3]; 1xTMTpro_zero [K13]; 1xTMTpro_zero [N-Term]	0	6.323e-05	0	-0.410408	19.5558	-2.67958	0.0386809	0.351771	-3.96336	1223	1	FALSE
QLAEWLDDAK	P60469	1xTMTpro_zero [K10]; 1xTMTpro_zero [N-Term]	0	3.511e-05	3	-0.409394	22.2086	-2.32396	0.0616566	0.474978	-4.4423	1224	1	FALSE
SVSPGVTQAVVEEHCASPEEK	P14873	1xCarbamidomethyl [C15]; 1xTMTpro_zero [K21]; 1xTMTpro_zero [N-Term]	0	3.511e-05	4	-0.409293	24.7944	-1.74907	0.133781	0.704245	-5.21082	1225	1	FALSE
YDCEAASR	O35136	1xCarbamidomethyl [C3]; 1xTMTpro_zero [N-Term]	0	0.001692	2	-0.407901	20.7512	-1.83976	0.118319	0.670152	-5.09209	1226	1	FALSE
TADSEVNTDQDIEK	Q8BFU3	1xTMTpro_zero [K14]; 1xTMTpro_zero [N-Term]	0	0.0001452	5	-0.407452	20.3283	-2.09716	0.0835405	0.566614	-4.74868	1227	1	FALSE
RGILTLK	P63268; P60710	1xTMTpro_zero [K7]; 1xTMTpro_zero [N-Term]	1	0.001782	0	-0.407425	27.4163	-1.68444	0.146005	0.733114	-5.29443	1228	1	FALSE
LDDLINWAR	Q9DC70	1xTMTpro_zero [N-Term]	0	0.001704	2	-0.406961	22.3641	-1.56825	0.17077	0.781104	-5.44209	1229	1	FALSE
SVELDSDDGGGSAAQK	P28738	1xTMTpro_zero [K16]; 1xTMTpro_zero [N-Term]	0	3.511e-05	4	-0.406333	21.2749	-1.95667	0.100993	0.620806	-4.93703	1230	1	FALSE
TALALAIAQELGSK	P60122	1xTMTpro_zero [K14]; 1xTMTpro_zero [N-Term]	0	0.0002861	1	-0.406009	19.168	-2.59484	0.0431685	0.377996	-4.07688	1231	1	FALSE
TPNTFAVCTEHR	P33173	1xCarbamidomethyl [C8]; 1xTMTpro_zero [N-Term]	0	3.511e-05	1	-0.404884	22.8672	-1.62269	0.1587	0.761541	-5.37337	1232	1	FALSE
SPAQQPGTAK	Q9QYX7	1xTMTpro_zero [K10]; 1xTMTpro_zero [N-Term]	0	6.323e-05	0	-0.404152	23.6956	-2.15507	0.0772784	0.542158	-4.67061	1233	1	FALSE
GESEDDFWWCIDR	Q80SW1; Q68FL4	1xCarbamidomethyl [C10]; 1xTMTpro_zero [N-Term]	0	3.511e-05	5	-0.403695	23.8936	-2.47865	0.0502506	0.419898	-4.23326	1234	1	FALSE
SEQAVAQLEEEK	O88448	1xTMTpro_zero [K12]; 1xTMTpro_zero [N-Term]	0	0.0001288	4	-0.403501	21.7259	-2.11073	0.0820273	0.560723	-4.7304	1235	1	FALSE
VDEGGWNTVQGAK	Q80XI3	1xTMTpro_zero [K13]; 1xTMTpro_zero [N-Term]	0	3.511e-05	2	-0.403501	21.7259	-2.11073	0.0820273	0.560723	-4.7304	1236	1	FALSE
AEGAAQLSEER	P59017	1xTMTpro_zero [N-Term]	0	0.0004027	3	-0.40338	21.8284	-2.77354	0.0342857	0.328788	-3.83816	1237	1	FALSE
NLNLVSSTASIK	Q91YM2	1xTMTpro_zero [K12]; 1xTMTpro_zero [N-Term]	0	3.511e-05	0	-0.402387	21.2561	-2.49599	0.0491192	0.412691	-4.20988	1238	1	FALSE
QYETLAEMVVPR	Q9Z1G3	1xTMTpro_zero [N-Term]	0	3.511e-05	2	-0.401701	20.4751	-2.70748	0.0373153	0.344437	-3.9261	1239	1	FALSE
NKDFAVDIIK	Q9D819	2xTMTpro_zero [K2; K10]; 1xTMTpro_zero [N-Term]	1	0.001947	2	-0.401347	23.155	-1.23477	0.265669	0.886714	-5.83987	1240	1	FALSE
DSQAALPK	Q9QXS6	1xTMTpro_zero [K8]; 1xTMTpro_zero [N-Term]	0	0.0001288	1	-0.401164	25.0041	-1.38129	0.219202	0.845501	-5.6707	1241	1	FALSE
NEGHEEKPLPPAQSQTQEGGPAAGK	Q7TSJ2	2xTMTpro_zero [K7; K25]; 1xTMTpro_zero [N-Term]	0	3.511e-05	4	-0.401153	23.0141	-1.77378	0.12938	0.694872	-5.17862	1242	1	FALSE
IMDYSLLLGVHNIDQQER	O70161	1xTMTpro_zero [N-Term]	0	3.511e-05	3	-0.399066	22.9626	-2.43099	0.0535053	0.437407	-4.2976	1243	1	FALSE
DNLGIIK	Q64516	1xTMTpro_zero [K7]; 1xTMTpro_zero [N-Term]	0	0.0003679	1	-0.398971	21.819	-1.48898	0.189927	0.806654	-5.54054	1244	1	FALSE
LDDTSYNPGLLTTQEPAIGK	Q5DTX6	1xTMTpro_zero [K20]; 1xTMTpro_zero [N-Term]	0	0.0001288	3	-0.398715	20.2754	-2.78879	0.0336248	0.324025	-3.81792	1245	1	FALSE
AATAAADFTAK	Q9Z1Z2	1xTMTpro_zero [K11]; 1xTMTpro_zero [N-Term]	0	3.511e-05	1	-0.398401	23.2659	-2.28537	0.0649081	0.489716	-4.4945	1246	1	FALSE
SPAVATEVQR	Q80XI3	1xTMTpro_zero [N-Term]	0	3.511e-05	1	-0.398304	22.7438	-1.41376	0.209961	0.835351	-5.63193	1247	1	FALSE
QNTQSDISGSGK	Q8C0T5	1xTMTpro_zero [K12]; 1xTMTpro_zero [N-Term]	0	3.511e-05	1	-0.397454	20.7833	-1.72534	0.138148	0.714869	-5.24163	1248	1	FALSE
STITDAGLEVMLEQMQGVVR	A2RT62	1xTMTpro_zero [N-Term]	0	3.511e-05	3	-0.397454	20.1997	-1.98632	0.097023	0.61041	-4.89744	1249	1	FALSE
QQHIEQLLAER	Q922J3; Q9Z0H8	1xTMTpro_zero [N-Term]	0	0.0001225	2	-0.397452	24.4447	-1.08453	0.322114	0.928675	-6.00185	1250	1	FALSE
VTQPDAFGLFLYK	Q921Q7	1xTMTpro_zero [K13]; 1xTMTpro_zero [N-Term]	0	0.0001225	1	-0.397072	20.4084	-1.93302	0.104278	0.62988	-4.96855	1251	1	FALSE
LVDAEELNYWTCK	Q91WC3	1xCarbamidomethyl [C12]; 1xTMTpro_zero [K13]; 1xTMTpro_zero [N-Term]	0	3.511e-05	3	-0.396958	21.3746	-2.1428	0.0785631	0.548679	-4.68716	1252	1	FALSE
VLWLDEIQQAINEANVDENR	Q3UQ44	1xTMTpro_zero [N-Term]	0	3.511e-05	5	-0.396955	20.2247	-2.12545	0.0804176	0.553827	-4.71055	1253	1	FALSE
CVDMVISELISTVR	P39053	1xCarbamidomethyl [C1]; 1xTMTpro_zero [N-Term]	0	0.0002306	2	-0.396732	19.9786	-2.02723	0.091805	0.593964	-4.84266	1254	1	FALSE
EIGGDVQK	P40124	1xTMTpro_zero [K8]; 1xTMTpro_zero [N-Term]	0	3.511e-05	2	-0.396624	23.7376	-2.52766	0.0471226	0.402234	-4.16721	1255	1	FALSE
LQMEAGLCEEQLNQADALLQSDIR	Q9QXS1	1xCarbamidomethyl [C8]; 1xTMTpro_zero [N-Term]	0	3.511e-05	5	-0.396574	20.9181	-2.39443	0.0561537	0.446691	-4.347	1256	1	FALSE
VNCSDNEFTQALTAAIPPESLTR	Q8CAQ8	1xCarbamidomethyl [C3]; 1xTMTpro_zero [N-Term]	0	3.511e-05	3	-0.396531	21.9801	-1.37434	0.221225	0.849485	-5.67893	1257	1	FALSE
DTAVQGNIR	Q8BFY6	1xTMTpro_zero [N-Term]	0	0.0008969	1	-0.395388	21.5434	-2.08579	0.0848301	0.570807	-4.76398	1258	1	FALSE
DVSDTVAFVEWTPPR	Q8BYI9	1xTMTpro_zero [N-Term]	0	3.511e-05	3	-0.395017	21.6987	-1.56521	0.171471	0.782403	-5.44591	1259	1	FALSE
ASDSGPSSSSSSSSSPPR	Q9QXS6	1xTMTpro_zero [N-Term]	0	0.0001288	1	-0.394836	19.8963	-2.11995	0.0810157	0.556858	-4.71797	1260	1	FALSE
VEVEEDGQLK	O54946	1xTMTpro_zero [K10]; 1xTMTpro_zero [N-Term]	0	0.00102	4	-0.394144	22.0456	-1.59052	0.165731	0.775139	-5.41409	1261	1	FALSE
HPGDAEK	Q8CIQ7	1xTMTpro_zero [K7]; 1xTMTpro_zero [N-Term]	0	0.0002996	2	-0.393714	22.0598	-2.32833	0.0612993	0.473012	-4.43639	1262	1	FALSE
ISVAAASK	O55234	1xTMTpro_zero [K8]; 1xTMTpro_zero [N-Term]	0	6.323e-05	0	-0.393377	21.2768	-2.7373	0.0359133	0.336476	-3.88635	1263	1	FALSE
LSLCFYPPGYSEQR	P36916	1xCarbamidomethyl [C4]; 1xTMTpro_zero [N-Term]	0	0.0002996	1	-0.393302	21.6112	-2.51385	0.0479821	0.406307	-4.18581	1264	1	FALSE
TPVVIDYTPYLK	O08576	1xTMTpro_zero [K12]; 1xTMTpro_zero [N-Term]	0	0.0001288	1	-0.393281	21.1333	-0.770295	0.472016	0.999197	-6.29263	1265	1	FALSE
REPSYFEIPTK	Q80U49	1xTMTpro_zero [K11]; 1xTMTpro_zero [N-Term]	1	0.001277	2	-0.393109	24.9088	-2.78396	0.0338327	0.325272	-3.82433	1266	1	FALSE
ETLHLEFTDLESK	Q80XK6	1xTMTpro_zero [K13]; 1xTMTpro_zero [N-Term]	0	3.511e-05	4	-0.392967	21.9668	-1.58094	0.16788	0.778513	-5.42615	1267	1	FALSE
SPAPVQTATTAPK	Q80XI3	1xTMTpro_zero [K13]; 1xTMTpro_zero [N-Term]	0	3.511e-05	0	-0.39256	22.0362	-1.61102	0.161216	0.765871	-5.38817	1268	1	FALSE
AGSAETESAAK	P06837	1xTMTpro_zero [K11]; 1xTMTpro_zero [N-Term]	0	3.511e-05	2	-0.391958	22.1857	-1.46658	0.195699	0.816574	-5.56797	1269	1	FALSE
IVPGLPLGWAK	Q80U87	1xTMTpro_zero [K11]; 1xTMTpro_zero [N-Term]	0	0.0006445	0	-0.391916	19.2523	-2.77012	0.0344359	0.32932	-3.84271	1270	1	FALSE
GPDWSIPILDFVEQK	Q8C6E0	1xTMTpro_zero [K15]; 1xTMTpro_zero [N-Term]	0	3.511e-05	3	-0.391577	20.244	-2.27874	0.065485	0.491668	-4.50347	1271	1	FALSE
SFVQNYPVVSIEDPFDQDDWGAWQK	P17182	1xTMTpro_zero [K25]; 1xTMTpro_zero [N-Term]	0	3.511e-05	5	-0.391276	22.6986	-2.74395	0.0356085	0.335458	-3.8775	1272	1	FALSE
ATHVPYR	Q9QXL2	1xTMTpro_zero [N-Term]	0	0.001242	0	-0.389859	24.5552	-2.73166	0.036174	0.336476	-3.89386	1273	1	FALSE
LADFGVAGQLTDTQIK	Q99JT2	1xTMTpro_zero [K16]; 1xTMTpro_zero [N-Term]	0	3.511e-05	2	-0.389856	20.9563	-2.72926	0.0362855	0.337266	-3.89706	1274	1	FALSE
THMQDLK	O55131; P28661	1xTMTpro_zero [K7]; 1xTMTpro_zero [N-Term]	0	0.000162	1	-0.389531	22.7371	-1.9032	0.108575	0.640683	-5.00819	1275	1	FALSE
VFASTGYGIAIQK	Q01097	1xTMTpro_zero [K13]; 1xTMTpro_zero [N-Term]	0	3.511e-05	0	-0.388749	21.5719	-1.57172	0.169977	0.780557	-5.43774	1276	1	FALSE
GEGPAVPGDTPPPTPR	P60469	1xTMTpro_zero [N-Term]	0	3.511e-05	2	-0.388692	22.159	-2.18647	0.0740889	0.529358	-4.62822	1277	1	FALSE
LDPFQELVLESNSVDELR	Q8BY87	1xTMTpro_zero [N-Term]	0	3.511e-05	5	-0.387831	20.368	-1.17365	0.287509	0.904931	-5.9073	1278	1	FALSE
ETELELK	Q8CHH9	1xTMTpro_zero [K7]; 1xTMTpro_zero [N-Term]	0	0.0005402	3	-0.387764	21.6919	-1.75428	0.132842	0.702261	-5.20405	1279	1	FALSE
IDSLSAQLSQLQK	P48678	1xTMTpro_zero [K13]; 1xTMTpro_zero [N-Term]	0	3.511e-05	1	-0.387161	20.3608	-2.75146	0.0352676	0.33383	-3.86751	1280	1	FALSE
TVGEPGWLYGSFQGK	Q9Z0R6	1xTMTpro_zero [K15]; 1xTMTpro_zero [N-Term]	0	0.0001452	1	-0.387153	20.2021	-1.93383	0.104164	0.62988	-4.96748	1281	1	FALSE
GFPGYMYTDLATIYER	P62814	1xTMTpro_zero [N-Term]	0	3.511e-05	2	-0.387141	22.462	-1.22125	0.270371	0.891936	-5.85496	1282	1	FALSE
VSILESLDK	Q9DBC7	1xTMTpro_zero [K9]; 1xTMTpro_zero [N-Term]	0	0.0002861	2	-0.38709	19.5542	-1.59817	0.16403	0.770372	-5.40442	1283	1	FALSE
QPPLVTGISPNEGIPWTK	Q9D4H1	1xTMTpro_zero [K18]; 1xTMTpro_zero [N-Term]	0	0.001947	1	-0.38709	20.3698	-2.35824	0.0589116	0.461762	-4.39593	1284	1	FALSE
VADIGLAAWGR	P50247	1xTMTpro_zero [N-Term]	0	0.0004707	1	-0.386678	20.2185	-1.17213	0.288071	0.905432	-5.90895	1285	1	FALSE
SIAEEQYSDLEK	P70336	1xTMTpro_zero [K12]; 1xTMTpro_zero [N-Term]	0	3.511e-05	4	-0.386551	22.8409	-1.25605	0.258413	0.881196	-5.81593	1286	1	FALSE
IIVMSFPVDSVDIGFR	Q80TZ3	1xTMTpro_zero [N-Term]	0	3.511e-05	2	-0.386234	21.6507	-2.12511	0.0804553	0.553827	-4.71102	1287	1	FALSE
AAGISLIVPGK	A2ALS5	1xTMTpro_zero [K11]; 1xTMTpro_zero [N-Term]	0	3.511e-05	0	-0.386015	23.3611	-2.23362	0.0695533	0.511713	-4.56448	1288	1	FALSE
SLSAPGNLLTK	Q8C078	1xTMTpro_zero [K11]; 1xTMTpro_zero [N-Term]	0	3.511e-05	0	-0.385419	22.0219	-1.6669	0.149506	0.739759	-5.31694	1289	1	FALSE
MELLSTPHSIEINNITCDSFR	Q8K0S0	1xAcetyl [N-Term]; 1xCarbamidomethyl [C17]; 1xTMTpro_zero [N-Term]	0	0.0004027	3	-0.385369	20.7651	-1.79659	0.125443	0.685522	-5.14879	1290	1	FALSE
SADCSVQTDDEDNADWEQPVRR	O88737	1xCarbamidomethyl [C4]; 1xTMTpro_zero [N-Term]	1	0.0001793	7	-0.385046	21.9507	-1.33477	0.233089	0.860175	-5.72547	1291	1	FALSE
AHQAEGK	P99029	1xTMTpro_zero [K7]; 1xTMTpro_zero [N-Term]	0	0.0008969	1	-0.384683	23.2874	-2.0986	0.0833782	0.566001	-4.74673	1292	1	FALSE
AACAEK	Q3TLH4; Q7TSC1	1xCarbamidomethyl [C3]; 1xTMTpro_zero [K6]; 1xTMTpro_zero [N-Term]	0	0.00205	1	-0.384498	21.3926	-2.40088	0.0556762	0.445664	-4.33828	1293	1	FALSE
VIQNCFLSNR	E9Q3L2	1xCarbamidomethyl [C5]; 1xTMTpro_zero [N-Term]	0	3.511e-05	0	-0.384281	21.8208	-1.83564	0.118981	0.672531	-5.09751	1294	1	FALSE
ADPVLLNNHSNLKPAPTVPAAPSSPDATSEPK	Q9JKC6	2xTMTpro_zero [K13; K32]; 1xTMTpro_zero [N-Term]	0	3.511e-05	3	-0.384273	20.9988	-2.37912	0.057303	0.452994	-4.36769	1295	1	FALSE
LCCGLSMFEVILTR	Q7TMB8; Q5SQX6	2xCarbamidomethyl [C2; C3]; 1xTMTpro_zero [N-Term]	0	3.511e-05	1	-0.384253	19.7862	-2.01538	0.0932854	0.598862	-4.85853	1296	1	FALSE
TGQEVVFVAEPDNK	Q9DBG6	1xTMTpro_zero [K14]; 1xTMTpro_zero [N-Term]	0	3.511e-05	3	-0.384154	21.2965	-1.61987	0.159304	0.762555	-5.37694	1297	1	FALSE
LTVIDTPGFGDQINNENCWEPIEK	Q9Z1S5	1xCarbamidomethyl [C18]; 1xTMTpro_zero [K24]; 1xTMTpro_zero [N-Term]	0	0.0001225	5	-0.384036	22.3627	-2.11294	0.0817837	0.559923	-4.72742	1298	1	FALSE
IIQTPGLWESENQNK	P35293	1xTMTpro_zero [K15]; 1xTMTpro_zero [N-Term]	0	0.0001793	2	-0.384032	22.4119	-1.58148	0.167759	0.778513	-5.42547	1299	1	FALSE
DVAPQAPVHFLVIPR	Q9D0S9	1xTMTpro_zero [N-Term]	0	3.511e-05	1	-0.383856	20.372	-1.25756	0.257906	0.880694	-5.81422	1300	1	FALSE
TQILAASYELHK	Q62261	1xTMTpro_zero [K12]; 1xTMTpro_zero [N-Term]	0	3.511e-05	1	-0.383716	25.4116	-1.45847	0.197827	0.820493	-5.57785	1301	1	FALSE
NSELVSPVKPER	Q3UNH4	1xTMTpro_zero [K9]; 1xTMTpro_zero [N-Term]	0	0.0001793	2	-0.383627	22.1157	-1.54055	0.177245	0.79198	-5.47672	1302	1	FALSE
EVAQDCTK	Q9CZW5	1xCarbamidomethyl [C6]; 1xTMTpro_zero [K8]; 1xTMTpro_zero [N-Term]	0	3.511e-05	2	-0.383445	20.5019	-1.86815	0.113854	0.65663	-5.05461	1303	1	FALSE
AQLVQHK	Q91ZU6	1xTMTpro_zero [K7]; 1xTMTpro_zero [N-Term]	0	0.002916	0	-0.382738	22.1954	-2.52921	0.047027	0.401665	-4.16512	1304	1	FALSE
SFEMSSFVETK	Q9Z1B3	1xTMTpro_zero [K11]; 1xTMTpro_zero [N-Term]	0	0.0001288	2	-0.382326	21.8978	-2.41167	0.0548876	0.441688	-4.32369	1305	1	FALSE
TLDPLYQQSLVFDESPQGK	Q99NE5	1xTMTpro_zero [K19]; 1xTMTpro_zero [N-Term]	0	3.511e-05	3	-0.382247	20.81	-2.13038	0.0798864	0.551534	-4.70391	1306	1	FALSE
TMTGLDTPVLMVIK	Q4KMM3	2xOxidation [M2; M11]; 1xTMTpro_zero [K14]; 1xTMTpro_zero [N-Term]	0	0.002988	1	-0.381764	19.3604	-0.540731	0.609278	0.999197	-6.45378	1307	1	FALSE
DIIHDPGR	P62918	1xTMTpro_zero [N-Term]	0	0.001214	2	-0.381176	21.4556	-2.33502	0.0607563	0.470479	-4.42733	1308	1	FALSE
SPVTNIAR	P84091	1xTMTpro_zero [N-Term]	0	0.0001288	0	-0.380845	26.6499	-1.51539	0.183329	0.799369	-5.50797	1309	1	FALSE
HLDYLIQATNETNVNIPQMADTLFER	Q61548	1xTMTpro_zero [N-Term]	0	3.511e-05	4	-0.380801	21.4881	-2.31717	0.0622158	0.477962	-4.45148	1310	1	FALSE
QIQQLESNNR	P70336	1xTMTpro_zero [N-Term]	0	3.511e-05	1	-0.38073	22.9851	-0.933248	0.388741	0.966961	-6.15084	1311	1	FALSE
AFMTADLPNELIELLEK	Q68FD5	1xTMTpro_zero [K17]; 1xTMTpro_zero [N-Term]	0	3.511e-05	4	-0.380725	25.6796	-2.42061	0.0542435	0.440077	-4.31162	1312	1	FALSE
EVLLLMSACK	Q8BGN8	1xCarbamidomethyl [C9]; 1xTMTpro_zero [K10]; 1xTMTpro_zero [N-Term]	0	3.511e-05	1	-0.380538	22.2622	-2.67754	0.0387824	0.352234	-3.96607	1313	1	FALSE
LSNIFVIGK	P62702	1xTMTpro_zero [K9]; 1xTMTpro_zero [N-Term]	0	0.001006	0	-0.379676	20.3505	-1.18276	0.284158	0.902309	-5.89738	1314	1	FALSE
LIQHAQIPPEDSEIITNMAHLGVPIVTDSTLR	O08599	1xTMTpro_zero [N-Term]	0	3.511e-05	4	-0.378846	26.176	-2.27772	0.0655734	0.492066	-4.50484	1315	1	FALSE
QDDGGAPILEYIVK	O35136	1xTMTpro_zero [K14]; 1xTMTpro_zero [N-Term]	0	3.511e-05	3	-0.378526	20.0932	-2.18246	0.0744876	0.530902	-4.63362	1316	1	FALSE
ISQLYGDLK	Q8K2B3	1xTMTpro_zero [K9]; 1xTMTpro_zero [N-Term]	0	0.0002306	1	-0.37837	21.1812	-1.79419	0.125852	0.686678	-5.15194	1317	1	FALSE
QTSGLQASTVWQNLDAK	Q7TPD3	1xTMTpro_zero [K17]; 1xTMTpro_zero [N-Term]	0	3.511e-05	1	-0.377653	20.3484	-1.39601	0.214965	0.841411	-5.65317	1318	1	FALSE
QLEQTLQQFNIK	Q8K221	1xTMTpro_zero [K12]; 1xTMTpro_zero [N-Term]	0	0.0001452	1	-0.377605	21.4011	-1.05484	0.334397	0.934529	-6.03229	1319	1	FALSE
LIHEGCLLWK	Q60875	1xCarbamidomethyl [C6]; 1xTMTpro_zero [K10]; 1xTMTpro_zero [N-Term]	0	0.0001288	1	-0.377463	21.3556	-1.76326	0.131236	0.697835	-5.19235	1320	1	FALSE
NLSADQWR	P28660	1xTMTpro_zero [N-Term]	0	0.0001225	1	-0.377101	22.0474	-1.86484	0.114365	0.657672	-5.05899	1321	1	FALSE
NQMGWPK	Q6PGG6	1xTMTpro_zero [K7]; 1xTMTpro_zero [N-Term]	0	0.003205	0	-0.376434	23.1835	-2.03757	0.090531	0.590219	-4.82878	1322	1	FALSE
VDSSSGLGDYLELHIHQGK	Q9CS84	1xTMTpro_zero [K19]; 1xTMTpro_zero [N-Term]	0	6.323e-05	3	-0.376155	21.4736	-0.916912	0.396546	0.971564	-6.16598	1323	1	FALSE
IEIEQNYAK	Q8K012	1xTMTpro_zero [K9]; 1xTMTpro_zero [N-Term]	0	0.0005047	2	-0.376127	21.6474	-2.41899	0.0543596	0.440394	-4.31381	1324	1	FALSE
KSQSVDITAPGFNPLGGAGK	Q4KMM3	2xTMTpro_zero [K1; K20]; 1xTMTpro_zero [N-Term]	1	3.511e-05	1	-0.376042	22.5457	-1.71273	0.140526	0.72237	-5.25795	1325	1	FALSE
EFIFSELLANLYSCGDQNTLMEESAEQAQR	P39053	1xCarbamidomethyl [C14]; 1xTMTpro_zero [N-Term]	0	3.511e-05	6	-0.375968	22.7745	-2.39565	0.0560626	0.446222	-4.34534	1326	1	FALSE
AEVCADCSAPDPGWASISR	Q68FF6	2xCarbamidomethyl [C4; C7]; 1xTMTpro_zero [N-Term]	0	3.511e-05	3	-0.375775	22.2186	-2.14003	0.0788569	0.549371	-4.6909	1327	1	FALSE
LCDFGVSGQLIDSMANSFVGTR	P31938	1xCarbamidomethyl [C2]; 1xTMTpro_zero [N-Term]	0	3.511e-05	2	-0.374402	21.1592	-1.45219	0.199491	0.822036	-5.5855	1328	1	FALSE
VVPTTDHIDTEK	Q8BH58	1xTMTpro_zero [K12]; 1xTMTpro_zero [N-Term]	0	3.511e-05	3	-0.374314	22.6184	-2.567	0.0447623	0.387559	-4.11428	1329	1	FALSE
KGNVSTISGLSSQTAGAK	Q9EPN1	2xTMTpro_zero [K1; K18]; 1xTMTpro_zero [N-Term]	1	3.511e-05	0	-0.37429	21.1465	-1.73441	0.136463	0.711479	-5.22987	1330	1	FALSE
YEDLAPCITLK	Q64514	1xCarbamidomethyl [C7]; 1xTMTpro_zero [K11]; 1xTMTpro_zero [N-Term]	0	0.0001288	2	-0.374186	22.1669	-1.03067	0.344678	0.940935	-6.05665	1331	1	FALSE
KGEGAQNQGK	Q99PL5	2xTMTpro_zero [K1; K10]; 1xTMTpro_zero [N-Term]	1	3.511e-05	1	-0.374091	22.2059	-2.04382	0.089771	0.587444	-4.82039	1332	1	FALSE
LASISVATEGPVTR	B9EJA2	1xTMTpro_zero [N-Term]	0	0.0002996	1	-0.373526	20.9463	-1.96275	0.100166	0.618753	-4.92893	1333	1	FALSE
GDSGDTLAATQSLLK	P08032	1xTMTpro_zero [K15]; 1xTMTpro_zero [N-Term]	0	3.511e-05	2	-0.373525	19.7172	-1.45418	0.198964	0.821054	-5.58308	1334	1	FALSE
TKVDDCQFVCIAQQDYCR	Q8CHG7	3xCarbamidomethyl [C6; C10; C17]; 1xTMTpro_zero [K2]; 1xTMTpro_zero [N-Term]	1	0.0001793	3	-0.373349	20.9743	-1.50531	0.185821	0.801442	-5.52043	1335	1	FALSE
SLCPVSWVSAWDDR	P56391	1xCarbamidomethyl [C3]; 1xTMTpro_zero [N-Term]	0	3.511e-05	2	-0.37323	24.064	-2.20857	0.0719258	0.519547	-4.59835	1336	1	FALSE
NDLYLTLEK	Q8CIQ7	1xTMTpro_zero [K9]; 1xTMTpro_zero [N-Term]	0	0.0001452	2	-0.37236	21.1557	-2.07466	0.0861124	0.574854	-4.77895	1337	1	FALSE
LLEAAEQLAQTGECDPEEIYQAAHQLEDR	Q0KL02	1xCarbamidomethyl [C14]; 1xTMTpro_zero [N-Term]	0	3.511e-05	8	-0.371675	20.872	-0.504018	0.633243	0.999197	-6.47491	1338	1	FALSE
AQIITEK	Q99P72	1xTMTpro_zero [K7]; 1xTMTpro_zero [N-Term]	0	0.0004707	1	-0.371499	23.8143	-1.37738	0.220337	0.847405	-5.67533	1339	1	FALSE
DGQLWLCAPQAK	P70398	1xCarbamidomethyl [C7]; 1xTMTpro_zero [K12]; 1xTMTpro_zero [N-Term]	0	3.511e-05	1	-0.371369	21.7667	-2.16415	0.0763416	0.539903	-4.65835	1340	1	FALSE
TNTGSAMLEQIAMSDR	Q64332; O88935	1xOxidation [M13]; 1xTMTpro_zero [N-Term]	0	3.511e-05	2	-0.371329	20.7384	-1.24374	0.262589	0.883452	-5.82981	1341	1	FALSE
ALEDLAQELEK	P15508	1xTMTpro_zero [K11]; 1xTMTpro_zero [N-Term]	0	0.000162	4	-0.371106	20.3053	-2.58897	0.0434992	0.380174	-4.08476	1342	1	FALSE
TVYVLPVGDADAAVVATTSYR	Q14BB9	1xTMTpro_zero [N-Term]	0	0.0001225	2	-0.371062	19.7273	-1.42301	0.207396	0.831401	-5.62081	1343	1	FALSE
FFLENGK	Q9JIS5	1xTMTpro_zero [K7]; 1xTMTpro_zero [N-Term]	0	0.001445	1	-0.370877	22.0884	-2.62291	0.0416229	0.368876	-4.03922	1344	1	FALSE
QLEYQQFEDDK	Q9WV92	1xTMTpro_zero [K11]; 1xTMTpro_zero [N-Term]	0	0.001434	4	-0.370579	20.0308	-1.78134	0.128063	0.692494	-5.16876	1345	1	FALSE
FRPPLLEMLAR	Q920I9	1xTMTpro_zero [N-Term]	0	0.000162	1	-0.370217	22.5146	-2.14034	0.0788237	0.549371	-4.69048	1346	1	FALSE
DYFEQYGK	P49312	1xTMTpro_zero [K8]; 1xTMTpro_zero [N-Term]	0	0.0004027	2	-0.370175	23.3403	-0.741702	0.487865	0.999197	-6.31528	1347	1	FALSE
REEAAVDAQQQK	Q9QXS1	1xTMTpro_zero [K12]; 1xTMTpro_zero [N-Term]	1	3.511e-05	3	-0.370169	23.148	-1.76999	0.130046	0.695974	-5.18358	1348	1	FALSE
APTIDIRPR	P22723	1xTMTpro_zero [N-Term]	0	0.0004707	1	-0.369856	21.7906	-1.77316	0.129488	0.694919	-5.17943	1349	1	FALSE
GWQPAPPPPPC	Q9WVK8	1xCarbamidomethyl [C11]; 1xTMTpro_zero [N-Term]	0	6.323e-05	0	-0.369625	21.2493	-2.15682	0.0770968	0.542158	-4.66824	1350	1	FALSE
GFEALIEK	Q9Z2C4	1xTMTpro_zero [K8]; 1xTMTpro_zero [N-Term]	0	0.001692	2	-0.369121	19.9861	-2.43004	0.0535726	0.437677	-4.29888	1351	1	FALSE
ALPSSEDLASLAPDLDKITESLSLLK	P58281	2xTMTpro_zero [K17; K26]; 1xTMTpro_zero [N-Term]	1	0.001254	5	-0.368974	19.5842	-1.51846	0.182578	0.797387	-5.50417	1352	1	FALSE
WLLDNVK	Q64516	1xTMTpro_zero [K7]; 1xTMTpro_zero [N-Term]	0	0.001214	1	-0.368771	22.475	-2.42142	0.0541853	0.440077	-4.31052	1353	1	FALSE
IIYEDYISILSPK	Q9QZB1	1xTMTpro_zero [K13]; 1xTMTpro_zero [N-Term]	0	0.000767	2	-0.368109	20.3766	-1.26597	0.255094	0.878885	-5.8047	1354	1	FALSE
SSVATTSGK	Q80X50	1xTMTpro_zero [K9]; 1xTMTpro_zero [N-Term]	0	0.0001452	0	-0.367738	21.4115	-1.11666	0.309252	0.923318	-5.9683	1355	1	FALSE
ETVTQRPGATVPTDFATFPSSAFLR	O08788	1xTMTpro_zero [N-Term]	0	0.0002996	2	-0.367566	21.6517	-1.12245	0.30698	0.921803	-5.96219	1356	1	FALSE
NIDEDELLGK	Q9JKK7	1xTMTpro_zero [K10]; 1xTMTpro_zero [N-Term]	0	0.001201	4	-0.36725	22.0235	-1.97964	0.0979033	0.613771	-4.90637	1357	1	FALSE
VGTLTQDVQR	Q80T41	1xTMTpro_zero [N-Term]	0	0.001904	1	-0.36687	22.0209	-2.19434	0.0733103	0.526267	-4.61757	1358	1	FALSE
DFYELEPEK	Q8CI94	1xTMTpro_zero [K9]; 1xTMTpro_zero [N-Term]	0	0.001031	4	-0.365789	21.4818	-2.29793	0.0638308	0.485009	-4.47751	1359	1	FALSE
AVGTQALSGAGLLK	Q9WV80	1xTMTpro_zero [K14]; 1xTMTpro_zero [N-Term]	0	3.511e-05	0	-0.365693	21.2964	-2.415	0.0546469	0.440502	-4.3192	1360	1	FALSE
QQQQLLNLR	Q9Z1B3	1xTMTpro_zero [N-Term]	0	6.323e-05	0	-0.36551	23.5135	-1.52511	0.180955	0.793748	-5.49592	1361	1	FALSE
EHCFDGIPITK	Q8BH44	1xCarbamidomethyl [C3]; 1xTMTpro_zero [K11]; 1xTMTpro_zero [N-Term]	0	3.511e-05	2	-0.365316	22.3582	-2.5786	0.0440907	0.383575	-4.09869	1362	1	FALSE
VKGDGTISAITEK	P31650	2xTMTpro_zero [K2; K13]; 1xTMTpro_zero [N-Term]	1	0.0001288	2	-0.364687	23.3968	-1.99314	0.0961329	0.607327	-4.88832	1363	1	FALSE
VDGISMSFQNLLAK	O54774	1xTMTpro_zero [K14]; 1xTMTpro_zero [N-Term]	0	3.511e-05	1	-0.363722	19.849	-1.36615	0.223634	0.851954	-5.68862	1364	1	FALSE
EHQQATK	Q8R5H1	1xTMTpro_zero [K7]; 1xTMTpro_zero [N-Term]	0	0.002318	1	-0.36362	20.8002	-1.27779	0.251184	0.874753	-5.79124	1365	1	FALSE
EPEPHQPAR	Q69ZW3	1xTMTpro_zero [N-Term]	0	0.0002861	2	-0.363377	20.0056	-1.96663	0.0996422	0.617487	-4.92375	1366	1	FALSE
FSQICAK	P56382	1xCarbamidomethyl [C5]; 1xTMTpro_zero [K7]; 1xTMTpro_zero [N-Term]	0	0.0003189	0	-0.363316	24.4396	-2.20004	0.0727527	0.524703	-4.60988	1367	1	FALSE
WDVDDWDNENSSAR	Q62261	1xTMTpro_zero [N-Term]	0	3.511e-05	5	-0.363035	25.3997	-2.30965	0.062842	0.480864	-4.46166	1368	1	FALSE
VILPVSVDEYQVGQLYSVAEASK	P53810	1xTMTpro_zero [K23]; 1xTMTpro_zero [N-Term]	0	3.511e-05	3	-0.362918	23.6369	-1.39507	0.215234	0.841411	-5.65429	1369	1	FALSE
AEGAGTEEEGTPK	Q91XV3	1xTMTpro_zero [K13]; 1xTMTpro_zero [N-Term]	0	3.511e-05	4	-0.362659	25.9454	-1.66469	0.149954	0.740267	-5.31978	1370	1	FALSE
ILGTLALIDQSETDWK	Q91VM9	1xTMTpro_zero [K16]; 1xTMTpro_zero [N-Term]	0	0.0005228	3	-0.36253	19.9313	-2.00662	0.0943961	0.603225	-4.87027	1371	1	FALSE
QLNNLALLCQNQGK	O88447	1xCarbamidomethyl [C9]; 1xTMTpro_zero [K14]; 1xTMTpro_zero [N-Term]	0	3.511e-05	0	-0.362494	21.3129	-2.55025	0.045751	0.392696	-4.1368	1372	1	FALSE
AEEERVEEEDR	Q9WV92	1xTMTpro_zero [N-Term]	1	0.0002306	7	-0.362234	20.2782	-1.53804	0.177843	0.792273	-5.47985	1373	1	FALSE
QREQQDTAESSDDFGSQLR	O88737	1xTMTpro_zero [N-Term]	1	0.0005565	5	-0.362195	20.9458	-1.51961	0.182296	0.796902	-5.50274	1374	1	FALSE
YVVVSTPEK	P18572	1xTMTpro_zero [K9]; 1xTMTpro_zero [N-Term]	0	0.0007754	1	-0.362077	21.3816	-2.49826	0.0489733	0.412037	-4.20682	1375	1	FALSE
GPPPTFNSLPANVSK	Q3UHD1	1xTMTpro_zero [K15]; 1xTMTpro_zero [N-Term]	0	0.0002209	0	-0.361818	21.1916	-1.76092	0.131653	0.699249	-5.1954	1376	1	FALSE
TTGEVVSGVVSK	A2AGT5	1xTMTpro_zero [K12]; 1xTMTpro_zero [N-Term]	0	3.511e-05	1	-0.361774	20.8622	-0.82568	0.442362	0.992075	-6.2468	1377	1	FALSE
VTEQLIEAISNGDFESYTK	P11798	1xTMTpro_zero [K19]; 1xTMTpro_zero [N-Term]	0	3.511e-05	4	-0.36166	28.3207	-0.991118	0.362056	0.949473	-6.09568	1378	1	FALSE
ASWASSTGYWGEDSEGDTGTIK	Q8CHG7	1xTMTpro_zero [K22]; 1xTMTpro_zero [N-Term]	0	3.511e-05	4	-0.361657	20.5784	-2.22907	0.0699786	0.513484	-4.57065	1379	1	FALSE
SLLAWLDR	Q80YA9	1xTMTpro_zero [N-Term]	0	0.0001793	1	-0.361483	23.0216	-1.64685	0.15361	0.749673	-5.3426	1380	1	FALSE
QLDEQVLLLQHSK	Q8BR92	1xTMTpro_zero [K13]; 1xTMTpro_zero [N-Term]	0	3.511e-05	2	-0.360636	20.7115	-1.46054	0.197281	0.820086	-5.57533	1381	1	FALSE
TTPTGWTLDQCIQTGVDNPGHPFIK	P30275	1xCarbamidomethyl [C11]; 1xTMTpro_zero [K25]; 1xTMTpro_zero [N-Term]	0	3.511e-05	2	-0.360571	23.6733	-1.6779	0.147302	0.734954	-5.30284	1382	1	FALSE
DVEANTVR	Q9EQZ6	1xTMTpro_zero [N-Term]	0	0.0001288	2	-0.360479	21.2257	-2.18841	0.0738955	0.529039	-4.62558	1383	1	FALSE
DVEGSTSPQIGDKVEFSISDK	Q91W50	2xTMTpro_zero [K13; K21]; 1xTMTpro_zero [N-Term]	1	0.0002996	5	-0.360107	21.1127	-0.830313	0.439944	0.991639	-6.24285	1384	1	FALSE
LSQSDEDVIR	Q8C6G8	1xTMTpro_zero [N-Term]	0	0.001947	3	-0.358418	20.9974	-1.06744	0.32914	0.93271	-6.01945	1385	1	FALSE
YSVLLVLTDGVVSDMAETR	Q9Z140	1xTMTpro_zero [N-Term]	0	3.511e-05	3	-0.358373	19.7445	-2.4517	0.0520645	0.429648	-4.26964	1386	1	FALSE
DYSGSQGGYDR	O89086	1xTMTpro_zero [N-Term]	0	0.001837	2	-0.358299	20.1138	-2.34008	0.0603493	0.468117	-4.42049	1387	1	FALSE
VSLVELCDGQADLASK	Q8C3F2	1xCarbamidomethyl [C7]; 1xTMTpro_zero [K16]; 1xTMTpro_zero [N-Term]	0	0.0001288	3	-0.357477	21.527	-1.11267	0.310827	0.923318	-5.97251	1388	1	FALSE
IDASSYFVESETK	Q8K4P8	1xTMTpro_zero [K13]; 1xTMTpro_zero [N-Term]	0	0.00279	3	-0.356829	20.2097	-1.97913	0.0979708	0.613918	-4.90705	1389	1	FALSE
AVLVVHPDKATGQPYEQYAK	Q99KY4; Q80TZ3	2xTMTpro_zero [K9; K20]; 1xTMTpro_zero [N-Term]	1	0.0002306	2	-0.35665	21.2104	-1.57275	0.169741	0.780557	-5.43645	1390	1	FALSE
AALESGVSTK	Q9WV34	1xTMTpro_zero [K10]; 1xTMTpro_zero [N-Term]	0	3.511e-05	1	-0.355924	23.5593	-1.01062	0.353402	0.945238	-6.07657	1391	1	FALSE
ETQPWSSPK	Q04690	1xTMTpro_zero [K9]; 1xTMTpro_zero [N-Term]	0	0.0006445	1	-0.355707	20.4568	-2.42163	0.0541707	0.440077	-4.31025	1392	1	FALSE
ENSAAPSPGRPQSASPAK	Q9Z0P4	1xTMTpro_zero [K18]; 1xTMTpro_zero [N-Term]	0	0.0001288	1	-0.355141	21.5636	-1.32108	0.237325	0.865234	-5.74141	1393	1	FALSE
GCEVVVSGK	P62908	1xCarbamidomethyl [C2]; 1xTMTpro_zero [K9]; 1xTMTpro_zero [N-Term]	0	0.000162	1	-0.355102	21.3802	-2.26948	0.0662988	0.495105	-4.51599	1394	1	FALSE
QYPWGTVQVENEAHCDFVK	Q9R1T4	1xCarbamidomethyl [C15]; 1xTMTpro_zero [K19]; 1xTMTpro_zero [N-Term]	0	6.323e-05	3	-0.354289	22.2653	-1.92668	0.105178	0.632021	-4.97699	1395	1	FALSE
SNVTAVHK	Q9D6R2	1xTMTpro_zero [K8]; 1xTMTpro_zero [N-Term]	0	0.0001225	0	-0.354133	22.1639	-1.98988	0.0965574	0.609179	-4.89268	1396	1	FALSE
WLAESPVGLPPEEEDKLTR	Q9QYR6	1xTMTpro_zero [K16]; 1xTMTpro_zero [N-Term]	1	0.0001288	5	-0.35345	26.2047	-1.76835	0.130336	0.695974	-5.18572	1397	1	FALSE
QLDSGLLLVTGPLVINR	P47911	1xTMTpro_zero [N-Term]	0	0.0001225	1	-0.352911	20.0824	-1.52617	0.180699	0.793748	-5.49461	1398	1	FALSE
LPTSHTCFNVLLLPEYSSK	O08759	1xCarbamidomethyl [C7]; 1xTMTpro_zero [K19]; 1xTMTpro_zero [N-Term]	0	3.511e-05	1	-0.352448	20.8329	-2.3138	0.0624957	0.47958	-4.45604	1399	1	FALSE
LPVPLESVK	Q9ERU9	1xTMTpro_zero [K9]; 1xTMTpro_zero [N-Term]	0	0.001947	1	-0.352377	20.1003	-2.28982	0.0645245	0.487881	-4.48848	1400	1	FALSE
VQPIPELSELSR	Q9JMH9	1xTMTpro_zero [N-Term]	0	0.001031	2	-0.352096	22.5827	-1.40826	0.211501	0.836024	-5.63853	1401	1	FALSE
SLENAIEWSVK	Q8BVQ5	1xTMTpro_zero [K11]; 1xTMTpro_zero [N-Term]	0	6.323e-05	2	-0.351589	21.6618	-1.99088	0.0964267	0.608631	-4.89134	1402	1	FALSE
AVGQSVGGAFSSAK	Q80U56	1xTMTpro_zero [K14]; 1xTMTpro_zero [N-Term]	0	3.511e-05	0	-0.351347	21.9044	-0.963353	0.374671	0.957435	-6.12244	1403	1	FALSE
HCILDVSGNAIK	Q91XM9; Q811D0; P70175	1xCarbamidomethyl [C2]; 1xTMTpro_zero [K12]; 1xTMTpro_zero [N-Term]	0	3.511e-05	1	-0.351292	23.4421	-1.35681	0.226411	0.855082	-5.69963	1404	1	FALSE
TQTAIASEDMPNTLTEAEK	Q62261	1xOxidation [M10]; 1xTMTpro_zero [K19]; 1xTMTpro_zero [N-Term]	0	3.511e-05	4	-0.351284	22.5067	-0.59004	0.577922	0.999197	-6.42331	1405	1	FALSE
EETLTYLNIVSPFELK	Q9JI90	1xTMTpro_zero [K16]; 1xTMTpro_zero [N-Term]	0	6.323e-05	3	-0.350849	19.9702	-1.50189	0.186675	0.802144	-5.52465	1406	1	FALSE
SSDDIDYR	Q8BPN8	1xTMTpro_zero [N-Term]	0	0.0002861	3	-0.350528	22.7689	-2.03507	0.090837	0.590504	-4.83213	1407	1	FALSE
NFGSYVTHETK	Q9D0M5; P63168	1xTMTpro_zero [K11]; 1xTMTpro_zero [N-Term]	0	3.511e-05	1	-0.350378	21.7804	-1.30064	0.243781	0.867222	-5.76505	1408	1	FALSE
INISEGNCPER	Q61990; P60335; P57722	1xCarbamidomethyl [C8]; 1xTMTpro_zero [N-Term]	0	3.511e-05	2	-0.350267	25.0611	-1.2223	0.270004	0.891936	-5.85379	1409	1	FALSE
VLNEECDQNWYK	Q60631	1xCarbamidomethyl [C6]; 1xTMTpro_zero [K12]; 1xTMTpro_zero [N-Term]	0	0.0001288	3	-0.350243	20.7398	-1.99387	0.0960374	0.607276	-4.88734	1410	1	FALSE
AASLTEDR	Q6NZJ6	1xTMTpro_zero [N-Term]	0	0.001214	2	-0.3497	22.0596	-1.91716	0.106542	0.635275	-4.98965	1411	1	FALSE
SLQLVVLDADTINHPAQLIK	Q8R0S4	1xTMTpro_zero [K20]; 1xTMTpro_zero [N-Term]	0	3.511e-05	2	-0.348782	21.6888	-2.18868	0.0738688	0.529039	-4.62522	1412	1	FALSE
TAEGQALSEAR	Q9D394	1xTMTpro_zero [N-Term]	0	3.511e-05	2	-0.348767	23.3655	-1.85065	0.116585	0.665483	-5.07772	1413	1	FALSE
RDPTANEDPEWILVEK	Q8BP92	1xTMTpro_zero [K16]; 1xTMTpro_zero [N-Term]	1	0.0008863	5	-0.34874	21.2191	-2.02427	0.0921718	0.594733	-4.84662	1414	1	FALSE
SSSSNLK	Q6ZQ38	1xTMTpro_zero [K7]; 1xTMTpro_zero [N-Term]	0	0.001099	0	-0.348251	21.9383	-1.57737	0.168688	0.779004	-5.43063	1415	1	FALSE
LACGVIGIAQ	P08228	1xCarbamidomethyl [C3]; 1xTMTpro_zero [N-Term]	0	0.0001288	0	-0.347772	20.8331	-2.18812	0.0739247	0.529039	-4.62598	1416	1	FALSE
TSSASDQETQASK	Q7TT50	1xTMTpro_zero [K13]; 1xTMTpro_zero [N-Term]	0	3.511e-05	2	-0.3475	20.5807	-1.66294	0.150308	0.740267	-5.32202	1417	1	FALSE
VEGSSTASSGSQLAEGK	Q6A0A9	1xTMTpro_zero [K17]; 1xTMTpro_zero [N-Term]	0	3.511e-05	2	-0.347334	22.4442	-1.06982	0.328153	0.932405	-6.01701	1418	1	FALSE
NCPDQDLK	Q80TJ1	1xCarbamidomethyl [C2]; 1xTMTpro_zero [K8]; 1xTMTpro_zero [N-Term]	0	0.0001288	2	-0.347274	23.1824	-1.64822	0.153327	0.749068	-5.34085	1419	1	FALSE
EDPPQTFYPQK	P39447	1xTMTpro_zero [K11]; 1xTMTpro_zero [N-Term]	0	0.00136	2	-0.347117	20.2399	-1.05906	0.332626	0.933866	-6.02799	1420	1	FALSE
DHTNAQFK	Q9DCT2	1xTMTpro_zero [K8]; 1xTMTpro_zero [N-Term]	0	0.0001793	1	-0.346401	21.4367	-1.71846	0.13944	0.719182	-5.25053	1421	1	FALSE
LIEEVHAVVTVR	P62743	1xTMTpro_zero [N-Term]	0	3.511e-05	2	-0.34633	24.0946	-1.37453	0.221171	0.849485	-5.67871	1422	1	FALSE
ETDQHCLALFR	Q8BGD5	1xCarbamidomethyl [C6]; 1xTMTpro_zero [N-Term]	0	0.0001793	2	-0.345944	22.8094	-1.482	0.191708	0.811283	-5.54911	1423	1	FALSE
LLNSDLGELISK	P34152	1xTMTpro_zero [K12]; 1xTMTpro_zero [N-Term]	0	3.511e-05	2	-0.345204	22.0618	-1.58078	0.167917	0.778513	-5.42635	1424	1	FALSE
YKGDLAPLWK	Q9EPU0	2xTMTpro_zero [K2; K10]; 1xTMTpro_zero [N-Term]	1	0.001654	1	-0.345017	21.8826	-1.56538	0.171432	0.782403	-5.4457	1425	1	FALSE
RAPPPPK	Q4ACU6	1xTMTpro_zero [K7]; 1xTMTpro_zero [N-Term]	1	0.001484	0	-0.344277	21.1178	-1.84283	0.117827	0.669002	-5.08804	1426	1	FALSE
SLWNDPGIQECYDR	P21279	1xCarbamidomethyl [C11]; 1xTMTpro_zero [N-Term]	0	3.511e-05	3	-0.344272	21.7702	-2.01811	0.0929421	0.597485	-4.85488	1427	1	FALSE
GLGPLAEAAAAGDGAAAAGAAR	O55106	1xTMTpro_zero [N-Term]	0	3.511e-05	2	-0.344253	21.6167	-1.1867	0.282719	0.9005	-5.89307	1428	1	FALSE
YCAGWADK	P24549	1xCarbamidomethyl [C2]; 1xTMTpro_zero [K8]; 1xTMTpro_zero [N-Term]	0	0.0001288	1	-0.344243	20.4728	-2.34843	0.059684	0.464157	-4.4092	1429	1	FALSE
EMHFHPK	Q05920	1xTMTpro_zero [K7]; 1xTMTpro_zero [N-Term]	0	0.0001452	1	-0.34407	24.2642	-1.09873	0.316378	0.924209	-5.98711	1430	1	FALSE
LQALWNACEK	Q5SSM3	1xCarbamidomethyl [C8]; 1xTMTpro_zero [K10]; 1xTMTpro_zero [N-Term]	0	3.511e-05	1	-0.343937	22.6302	-2.13983	0.0788775	0.549371	-4.69116	1431	1	FALSE
YTSALTYDAVQVMTEAFR	P23819	1xTMTpro_zero [N-Term]	0	3.511e-05	2	-0.343893	21.3312	-2.16972	0.0757722	0.537283	-4.65082	1432	1	FALSE
NLPGLVQEGEPFSEEATLFTK	Q78PY7	1xTMTpro_zero [K21]; 1xTMTpro_zero [N-Term]	0	3.511e-05	4	-0.343496	21.0665	-1.34204	0.230868	0.85764	-5.71698	1433	1	FALSE
LHDEDHTVVASNNGPAFTVEVDGSK	Q91ZA3	1xTMTpro_zero [K25]; 1xTMTpro_zero [N-Term]	0	3.511e-05	5	-0.343169	24.6121	-0.989124	0.36295	0.949473	-6.09762	1434	1	FALSE
LGQLPPEDYVVVVK	Q9QVP9	1xTMTpro_zero [K14]; 1xTMTpro_zero [N-Term]	0	0.0002996	2	-0.342853	22.3628	-1.07041	0.327908	0.932405	-6.0164	1435	1	FALSE
GVNASAQK	Q62261	1xTMTpro_zero [K8]; 1xTMTpro_zero [N-Term]	0	3.511e-05	0	-0.342513	26.7793	-1.90832	0.107824	0.639955	-5.00139	1436	1	FALSE
AADEEAFEDNSEEYIR	Q9ERK4	1xTMTpro_zero [N-Term]	0	0.0001288	7	-0.342473	20.5854	-1.79821	0.12517	0.685322	-5.14668	1437	1	FALSE
ALYSTAMESIQGGAAR	O70161	1xTMTpro_zero [N-Term]	0	3.511e-05	1	-0.342076	21.3602	-1.10576	0.313569	0.923384	-5.97976	1438	1	FALSE
AIWNVINWENVTER	P09671	1xTMTpro_zero [N-Term]	0	3.511e-05	2	-0.341822	20.2883	-2.21716	0.0711023	0.517094	-4.58673	1439	1	FALSE
LYGGVCYAGIDTDPELK	Q812E0	1xCarbamidomethyl [C6]; 1xTMTpro_zero [K17]; 1xTMTpro_zero [N-Term]	0	3.511e-05	3	-0.34175	21.6891	-1.58347	0.167311	0.778078	-5.42297	1440	1	FALSE
DNLTLWTSDTQGDEAEAGEGGEN	P63101	1xTMTpro_zero [N-Term]	0	6.323e-05	7	-0.34026	25.4066	-2.28638	0.0648206	0.489587	-4.49313	1441	1	FALSE
QSSEEK	O70443	1xTMTpro_zero [K6]; 1xTMTpro_zero [N-Term]	0	0.002403	2	-0.340224	21.8944	-1.39179	0.216172	0.842683	-5.6582	1442	1	FALSE
QCQPTDTVCASVR	Q9WUC3	2xCarbamidomethyl [C2; C9]; 1xTMTpro_zero [N-Term]	0	3.511e-05	1	-0.340206	22.2413	-2.08764	0.0846189	0.570347	-4.76149	1443	1	FALSE
WWTCFVK	Q9JM76	1xCarbamidomethyl [C4]; 1xTMTpro_zero [K7]; 1xTMTpro_zero [N-Term]	0	0.0002008	0	-0.339938	22.4421	-1.81497	0.122358	0.679742	-5.12468	1444	1	FALSE
EDPVLDP	P54923	1xTMTpro_zero [N-Term]	0	0.002803	3	-0.339417	21.2051	-1.56094	0.172457	0.783835	-5.45125	1445	1	FALSE
GNPSGIQPDLLISLTAPK	Q8K4Z3	1xTMTpro_zero [K18]; 1xTMTpro_zero [N-Term]	0	0.0001288	1	-0.339116	20.4888	-1.10689	0.313117	0.923384	-5.97857	1446	1	FALSE
LLSTSPALQGTPASR	Q9Z0E0	1xTMTpro_zero [N-Term]	0	3.511e-05	0	-0.338863	23.2899	-1.42844	0.205902	0.829995	-5.61425	1447	1	FALSE
DKEAEDGIIAYDDCGVK	Q91W50	1xCarbamidomethyl [C14]; 2xTMTpro_zero [K2; K17]; 1xTMTpro_zero [N-Term]	1	3.511e-05	6	-0.338397	21.3078	-2.38151	0.0571223	0.452327	-4.36447	1448	1	FALSE
SFDLISHNR	Q9QWY8	1xTMTpro_zero [N-Term]	0	0.000162	1	-0.33822	19.9668	-0.820976	0.444826	0.992478	-6.25079	1449	1	FALSE
LLDPQTNTEIANYPIYK	A2AWA9	1xTMTpro_zero [K17]; 1xTMTpro_zero [N-Term]	0	3.511e-05	2	-0.33669	21.4804	-2.09684	0.0835761	0.566614	-4.7491	1450	1	FALSE
ISLADIAQK	P14685	1xTMTpro_zero [K9]; 1xTMTpro_zero [N-Term]	0	0.001384	1	-0.336127	19.957	-1.73155	0.136992	0.713169	-5.23358	1451	1	FALSE
GDSLKEPTSIADSSR	Q8VDZ4	1xTMTpro_zero [K5]; 1xTMTpro_zero [N-Term]	1	0.001623	3	-0.335973	21.1947	-1.18382	0.28377	0.901861	-5.89622	1452	1	FALSE
CDVLWEDFHQK	Q7TQF7	1xCarbamidomethyl [C1]; 1xTMTpro_zero [K11]; 1xTMTpro_zero [N-Term]	0	3.511e-05	3	-0.335936	22.5406	-1.80571	0.123903	0.68341	-5.13684	1453	1	FALSE
QAQFALQR	O88737	1xTMTpro_zero [N-Term]	0	0.0001452	0	-0.335918	25.4896	-0.914677	0.397623	0.971721	-6.16803	1454	1	FALSE
ATIGILITTIASK	Q99LG2	1xTMTpro_zero [K13]; 1xTMTpro_zero [N-Term]	0	0.0004027	0	-0.33531	20.1644	-2.08866	0.0845025	0.570347	-4.76011	1455	1	FALSE
AALAQAADCEVEQWNSDDPIPR	Q91Z53	1xCarbamidomethyl [C9]; 1xTMTpro_zero [N-Term]	0	0.0001452	5	-0.33522	20.8914	-1.36979	0.222562	0.851367	-5.68432	1456	1	FALSE
RLLDTEDELSDIQTDSVPSEVR	Q61481	1xTMTpro_zero [N-Term]	1	3.511e-05	7	-0.3339	21.1911	-1.15479	0.294556	0.910177	-5.9277	1457	1	FALSE
GQTAVQK	P48758	1xTMTpro_zero [K7]; 1xTMTpro_zero [N-Term]	0	0.001266	0	-0.333565	22.0077	-1.76869	0.130275	0.695974	-5.18527	1458	1	FALSE
FYGLYCVQSGGK	O70161	1xCarbamidomethyl [C6]; 1xTMTpro_zero [K12]; 1xTMTpro_zero [N-Term]	0	0.0001793	0	-0.333441	22.3841	-1.8027	0.124411	0.684171	-5.1408	1459	1	FALSE
ADQCYEDVR	O89053	1xCarbamidomethyl [C4]; 1xTMTpro_zero [N-Term]	0	3.511e-05	3	-0.333259	23.079	-2.24127	0.0688454	0.508118	-4.55414	1460	1	FALSE
NLALCPANHAPLR	Q02248	1xCarbamidomethyl [C5]; 1xTMTpro_zero [N-Term]	0	3.511e-05	0	-0.333205	23.9197	-1.57714	0.168742	0.779004	-5.43093	1461	1	FALSE
LNFANPPVK	P47809	1xTMTpro_zero [K9]; 1xTMTpro_zero [N-Term]	0	0.0009105	0	-0.333103	21.3455	-1.42623	0.20651	0.830639	-5.61693	1462	1	FALSE
ESADPLSAWLQDAK	Q9QXS1	1xTMTpro_zero [K14]; 1xTMTpro_zero [N-Term]	0	3.511e-05	3	-0.333085	23.3633	-2.34868	0.0596637	0.464157	-4.40886	1463	1	FALSE
LTEAAEQNK	P08553	1xTMTpro_zero [K9]; 1xTMTpro_zero [N-Term]	0	3.511e-05	2	-0.333074	27.9184	-0.997598	0.359161	0.946655	-6.08936	1464	1	FALSE
FWDNFLR	Q3UIU2	1xTMTpro_zero [N-Term]	0	0.0006959	1	-0.332711	22.447	-1.49111	0.189388	0.806235	-5.53793	1465	1	FALSE
SEEGGDGDEKDK	G5E829	2xTMTpro_zero [K10; K12]; 1xTMTpro_zero [N-Term]	1	0.001925	6	-0.332402	21.0122	-1.47672	0.193067	0.81321	-5.55558	1466	1	FALSE
AQEEWTTGAWK	Q9JKD3	1xTMTpro_zero [K11]; 1xTMTpro_zero [N-Term]	0	3.511e-05	2	-0.331822	26.2609	-2.22531	0.0703309	0.514982	-4.57572	1467	1	FALSE
HVQELAEQLYK	Q6ZPE2	1xTMTpro_zero [K11]; 1xTMTpro_zero [N-Term]	0	3.511e-05	2	-0.33173	21.9233	-1.8928	0.110114	0.644959	-5.02197	1468	1	FALSE
NPCGEEDLEGWSDVEHGGDGWR	Q80UW2	1xCarbamidomethyl [C3]; 1xTMTpro_zero [N-Term]	0	3.511e-05	7	-0.331104	20.8834	-1.80252	0.124441	0.684171	-5.14103	1469	1	FALSE
VWIPDPEEVWK	Q99104	1xTMTpro_zero [K11]; 1xTMTpro_zero [N-Term]	0	6.323e-05	3	-0.330925	24.373	-2.27469	0.0658397	0.493135	-4.50895	1470	1	FALSE
TYSWDNAQVILVGNK	P63011; Q9CZT8	1xTMTpro_zero [K15]; 1xTMTpro_zero [N-Term]	0	3.511e-05	1	-0.330644	26.3309	-1.48713	0.190398	0.807952	-5.54281	1471	1	FALSE
GCEPDTTAPSGQNESER	Q61290	1xCarbamidomethyl [C2]; 1xTMTpro_zero [N-Term]	0	3.511e-05	4	-0.329746	19.7986	-1.96513	0.0998441	0.617487	-4.92575	1472	1	FALSE
RVDQNWYEGK	Q3UTJ2	1xTMTpro_zero [K10]; 1xTMTpro_zero [N-Term]	1	0.00107	2	-0.329682	22.9943	-1.81821	0.121823	0.679375	-5.12043	1473	1	FALSE
LGFSEVELVQMVVDGVK	Q04447	1xTMTpro_zero [K17]; 1xTMTpro_zero [N-Term]	0	3.511e-05	3	-0.329666	25.7594	-2.19566	0.0731808	0.526036	-4.61579	1474	1	FALSE
TLTTLDLQENAIGDEGASSVAGALK	Q5DU56	1xTMTpro_zero [K25]; 1xTMTpro_zero [N-Term]	0	0.002115	4	-0.32963	20.5024	-1.24913	0.260753	0.882247	-5.82374	1475	1	FALSE
QEAEQLK	P62874	1xTMTpro_zero [K7]; 1xTMTpro_zero [N-Term]	0	0.0003531	2	-0.329582	25.1479	-1.37932	0.219773	0.846289	-5.67304	1476	1	FALSE
GYTISDSAPSR	Q61037	1xTMTpro_zero [N-Term]	0	0.002916	1	-0.32954	21.347	-0.930969	0.389823	0.967529	-6.15297	1477	1	FALSE
KPGSAGGPK	Q8BRT1	2xTMTpro_zero [K1; K9]; 1xTMTpro_zero [N-Term]	0	3.511e-05	0	-0.328726	22.9757	-1.53427	0.178746	0.792273	-5.48454	1478	1	FALSE
WQDLNVISSLLK	Q69ZH9	1xTMTpro_zero [K12]; 1xTMTpro_zero [N-Term]	0	3.511e-05	1	-0.328576	19.9539	-1.32579	0.235862	0.86375	-5.73594	1479	1	FALSE
VHVIQPK	Q9ESN9	1xTMTpro_zero [K7]; 1xTMTpro_zero [N-Term]	0	0.0002861	0	-0.328465	22.8415	-1.26635	0.254966	0.878885	-5.80426	1480	1	FALSE
EGNDLYHEMIESGVINLK	P56480	1xTMTpro_zero [K18]; 1xTMTpro_zero [N-Term]	0	3.511e-05	4	-0.327625	21.2184	-1.89196	0.11024	0.644959	-5.02309	1481	1	FALSE
GQVTSSCSSQR	Q8CAA7	1xCarbamidomethyl [C7]; 1xTMTpro_zero [N-Term]	0	0.0002996	0	-0.327553	22.3768	-2.08351	0.0850912	0.571515	-4.76705	1482	1	FALSE
EQPLDEEMKEAFQNAYLELGGLGER	Q6PIC6	1xTMTpro_zero [K9]; 1xTMTpro_zero [N-Term]	1	3.511e-05	7	-0.327536	26.569	-1.92808	0.104978	0.632021	-4.97513	1483	1	FALSE
LHSLVKPSVDFVCR	O89112	1xCarbamidomethyl [C13]; 1xTMTpro_zero [K6]; 1xTMTpro_zero [N-Term]	0	0.001214	1	-0.327378	23.1849	-0.911647	0.399088	0.97254	-6.17082	1484	1	FALSE
AGSASQGK	Q3UNH4	1xTMTpro_zero [K8]; 1xTMTpro_zero [N-Term]	0	6.323e-05	0	-0.326935	21.1445	-1.86673	0.114074	0.657353	-5.05649	1485	1	FALSE
ANEQLTDELAQK	P28738	1xTMTpro_zero [K12]; 1xTMTpro_zero [N-Term]	0	3.511e-05	3	-0.326718	21.8845	-2.13618	0.0792656	0.550216	-4.69609	1486	1	FALSE
ELVDDSITNVK	P23506	1xTMTpro_zero [K11]; 1xTMTpro_zero [N-Term]	0	3.511e-05	3	-0.326676	25.324	-1.75189	0.133271	0.702714	-5.20715	1487	1	FALSE
ITAHEALK	P28652	1xTMTpro_zero [K8]; 1xTMTpro_zero [N-Term]	0	3.511e-05	1	-0.326355	27.3701	-1.34434	0.230168	0.85764	-5.71428	1488	1	FALSE
ICCLEGLK	Q8VHW2	2xCarbamidomethyl [C2; C3]; 1xTMTpro_zero [K8]; 1xTMTpro_zero [N-Term]	0	0.0001288	1	-0.326243	22.1004	-1.47187	0.194319	0.814595	-5.5615	1489	1	FALSE
EAQAVAQEWK	Q91Z61	1xTMTpro_zero [K10]; 1xTMTpro_zero [N-Term]	0	3.511e-05	2	-0.326194	21.1561	-2.13679	0.0792003	0.550216	-4.69526	1490	1	FALSE
SLEDALNR	Q8CAQ8	1xTMTpro_zero [N-Term]	0	0.001331	2	-0.32605	23.1346	-1.10807	0.31265	0.923384	-5.97734	1491	1	FALSE
KADHEADK	P70336	2xTMTpro_zero [K1; K8]; 1xTMTpro_zero [N-Term]	1	0.001692	3	-0.325877	23.5867	-2.30827	0.0629572	0.481	-4.46352	1492	1	FALSE
GEAGGPPSTR	Q6NZL0	1xTMTpro_zero [N-Term]	0	0.001756	1	-0.325297	21.1052	-2.21582	0.07123	0.517465	-4.58854	1493	1	FALSE
DVHLEIPDAADSFIPK	Q148V7	1xTMTpro_zero [K16]; 1xTMTpro_zero [N-Term]	0	0.0002209	4	-0.325126	20.1773	-0.593029	0.576052	0.999197	-6.42138	1494	1	FALSE
AVVIHK	Q9JKS5	1xTMTpro_zero [K6]; 1xTMTpro_zero [N-Term]	0	0.003194	0	-0.324617	22.6039	-2.25409	0.0676755	0.501882	-4.53681	1495	1	FALSE
TSLDLYANVIHCK	P70404	1xCarbamidomethyl [C12]; 1xTMTpro_zero [K13]; 1xTMTpro_zero [N-Term]	0	3.511e-05	1	-0.324168	20.8825	-1.87129	0.113371	0.65575	-5.05046	1496	1	FALSE
WAPTVTK	E9Q3L2	1xTMTpro_zero [K7]; 1xTMTpro_zero [N-Term]	0	0.001445	0	-0.324104	21.3903	-2.29244	0.0642987	0.486703	-4.48493	1497	1	FALSE
SADCSVQTDDEDNADWEQPVR	O88737	1xCarbamidomethyl [C4]; 1xTMTpro_zero [N-Term]	0	3.511e-05	7	-0.323855	23.1937	-1.62716	0.157747	0.760037	-5.36769	1498	1	FALSE
VACQGEVVR	Q8CGC7	1xCarbamidomethyl [C3]; 1xTMTpro_zero [N-Term]	0	0.0001452	1	-0.323517	21.5486	-1.51055	0.184522	0.799861	-5.51395	1499	1	FALSE
GPPPSYGGSSR	Q9WV02	1xTMTpro_zero [N-Term]	0	0.001692	0	-0.323515	22.2627	-1.72749	0.137747	0.714522	-5.23884	1500	1	FALSE
LQNLQLQPGK	P32020	1xTMTpro_zero [K10]; 1xTMTpro_zero [N-Term]	0	0.0002861	0	-0.323494	20.1251	-2.09985	0.0832374	0.565421	-4.74504	1501	1	FALSE
VLGILAMIDEGETDWK	Q9D819	1xTMTpro_zero [K16]; 1xTMTpro_zero [N-Term]	0	3.511e-05	4	-0.323418	20.708	-1.96528	0.0998243	0.617487	-4.92555	1502	1	FALSE
RPPTAPENTPSVPSGVK	Q7TSC1	1xTMTpro_zero [K17]; 1xTMTpro_zero [N-Term]	0	0.0001288	1	-0.323246	21.5342	-1.86944	0.113655	0.656386	-5.0529	1503	1	FALSE
FNPFDLISDSEAVQEETTKK	Q9QYX7	2xTMTpro_zero [K19; K20]; 1xTMTpro_zero [N-Term]	1	0.001292	5	-0.322412	22.2743	-0.93144	0.389599	0.967496	-6.15253	1504	1	FALSE
ASGSPDPTISWFR	O35136	1xTMTpro_zero [N-Term]	0	0.000162	1	-0.322374	21.1915	-1.74808	0.133961	0.704245	-5.21211	1505	1	FALSE
TIQQCCENILLNAAWLK	Q11011	2xCarbamidomethyl [C5; C6]; 1xTMTpro_zero [K17]; 1xTMTpro_zero [N-Term]	0	3.511e-05	1	-0.320814	20.9656	-1.04894	0.336884	0.935141	-6.03828	1506	1	FALSE
VASNPYTWFTMEALEETWR	P16546	1xTMTpro_zero [N-Term]	0	3.511e-05	3	-0.32038	23.5497	-1.65852	0.151209	0.743745	-5.32768	1507	1	FALSE
LFCDFGDEFEVSDTTGEEPK	Q8C7R4	1xCarbamidomethyl [C3]; 1xTMTpro_zero [K20]; 1xTMTpro_zero [N-Term]	0	3.511e-05	7	-0.320302	19.8273	-2.21112	0.0716802	0.518851	-4.5949	1508	1	FALSE
VDIQNK	P42669	1xTMTpro_zero [K6]; 1xTMTpro_zero [N-Term]	0	0.003087	1	-0.320027	21.8177	-1.70942	0.141155	0.723199	-5.26222	1509	1	FALSE
GNIILIPER	Q7TME0	1xTMTpro_zero [N-Term]	0	0.0005565	1	-0.319968	21.496	-1.47486	0.193546	0.81385	-5.55785	1510	1	FALSE
GAVDDDVAEADIISTVEFNHSGELLATGDK	Q6P1F6	1xTMTpro_zero [K30]; 1xTMTpro_zero [N-Term]	0	0.001434	8	-0.319655	26.2752	-2.06844	0.0868373	0.577461	-4.78731	1511	1	FALSE
TYIQCIAAISR	Q6ZQ38	1xCarbamidomethyl [C5]; 1xTMTpro_zero [N-Term]	0	0.0001793	0	-0.319232	21.9652	-1.81415	0.122495	0.679965	-5.12576	1512	1	FALSE
ETLSVDPFPLSDQIR	E9QAT4	1xTMTpro_zero [N-Term]	0	0.0002306	3	-0.319218	20.9419	-1.32214	0.236997	0.864866	-5.74019	1513	1	FALSE
FIPFIGVVK	Q8K212	1xTMTpro_zero [K9]; 1xTMTpro_zero [N-Term]	0	6.323e-05	0	-0.318629	20.4087	-1.73994	0.135445	0.708565	-5.22269	1514	1	FALSE
VNPLSWIQK	Q8BWT5	1xTMTpro_zero [K9]; 1xTMTpro_zero [N-Term]	0	3.511e-05	0	-0.318361	20.5394	-1.50106	0.186883	0.802144	-5.52567	1515	1	FALSE
EWEPLSEPK	Q8C078	1xTMTpro_zero [K9]; 1xTMTpro_zero [N-Term]	0	0.001266	3	-0.317894	22.0225	-1.62299	0.158635	0.761541	-5.37298	1516	1	FALSE
MEEIVEGCTGALHILAR	Q02257; Q02248	1xCarbamidomethyl [C8]; 1xTMTpro_zero [N-Term]	0	3.511e-05	3	-0.317664	22.0326	-1.99449	0.0959574	0.607046	-4.88651	1517	1	FALSE
EDKEGTDHSAAK	Q8C419	2xTMTpro_zero [K3; K12]; 1xTMTpro_zero [N-Term]	1	0.0002306	4	-0.317608	23.851	-1.90598	0.108166	0.640478	-5.00449	1518	1	FALSE
NDPFTSDPFTK	Q60902	1xTMTpro_zero [K11]; 1xTMTpro_zero [N-Term]	0	3.511e-05	2	-0.317355	21.09	-1.71976	0.139195	0.71845	-5.24885	1519	1	FALSE
ESCTWALETLGGLDTVVK	Q3UGY8	1xCarbamidomethyl [C3]; 1xTMTpro_zero [K18]; 1xTMTpro_zero [N-Term]	0	3.511e-05	3	-0.317256	20.9873	-1.51115	0.184374	0.799861	-5.51322	1520	1	FALSE
QMDEFIEIQSSTGTWYQR	Q8BG39	1xTMTpro_zero [N-Term]	0	3.511e-05	3	-0.316955	20.1298	-1.05169	0.335721	0.934665	-6.03549	1521	1	FALSE
GCTATLGNFAK	P25444	1xCarbamidomethyl [C2]; 1xTMTpro_zero [K11]; 1xTMTpro_zero [N-Term]	0	3.511e-05	0	-0.316586	21.7651	-2.13735	0.0791415	0.550216	-4.69452	1522	1	FALSE
QGQPIYNISSLLR	Q80U23	1xTMTpro_zero [N-Term]	0	0.0008969	0	-0.316338	21.598	-1.94046	0.103233	0.62755	-4.95864	1523	1	FALSE
GDAAVYCYQAEAGEWR	Q8BNW9	1xCarbamidomethyl [C7]; 1xTMTpro_zero [N-Term]	0	3.511e-05	3	-0.316065	20.8609	-2.14775	0.0780419	0.546585	-4.68048	1524	1	FALSE
TTVYVVEDQR	Q8K353	1xTMTpro_zero [N-Term]	0	3.511e-05	2	-0.316033	21.6514	-0.921045	0.39456	0.970882	-6.16217	1525	1	FALSE
GASPVTPSTTPPPPTDPQLTK	Q80U49	1xTMTpro_zero [K21]; 1xTMTpro_zero [N-Term]	0	3.511e-05	1	-0.315439	21.8543	-2.14574	0.0782538	0.547344	-4.6832	1526	1	FALSE
KPQYDIWGNTVNVASR	P84309	1xTMTpro_zero [K1]; 1xTMTpro_zero [N-Term]	0	3.511e-05	1	-0.314689	21.9543	-2.23144	0.0697569	0.512398	-4.56744	1527	1	FALSE
YGIDEYLEVK	Q8BWF0	1xTMTpro_zero [K10]; 1xTMTpro_zero [N-Term]	0	0.001411	3	-0.314557	20.191	-1.97037	0.0991382	0.617052	-4.91875	1528	1	FALSE
QQPPLGPSSSLLSLPSLK	Q8BHL3	1xTMTpro_zero [K18]; 1xTMTpro_zero [N-Term]	0	0.002029	0	-0.314126	21.1024	-1.72532	0.138152	0.714869	-5.24165	1529	1	FALSE
TEIEGTQK	Q9QVP9	1xTMTpro_zero [K8]; 1xTMTpro_zero [N-Term]	0	0.0001288	2	-0.314038	21.9364	-2.22817	0.0700629	0.513831	-4.57186	1530	1	FALSE
AFEGQAHSGK	P32037	1xTMTpro_zero [K10]; 1xTMTpro_zero [N-Term]	0	3.511e-05	1	-0.31368	22.4722	-2.15346	0.0774459	0.543058	-4.67278	1531	1	FALSE
LQHQQLYYQDDSTR	Q68FH0	1xTMTpro_zero [N-Term]	0	3.511e-05	2	-0.313621	20.5779	-0.778327	0.467629	0.999197	-6.28614	1532	1	FALSE
AWQYLSNSK	Q8BHL3	1xTMTpro_zero [K9]; 1xTMTpro_zero [N-Term]	0	0.000162	0	-0.313597	20.8076	-2.19716	0.0730343	0.525962	-4.61377	1533	1	FALSE
SPGVDPK	Q9QYX7	1xTMTpro_zero [K7]; 1xTMTpro_zero [N-Term]	0	0.002938	1	-0.313435	23.0633	-1.65856	0.151201	0.743745	-5.32763	1534	1	FALSE
SHLQEYLNK	E9Q3L2	1xTMTpro_zero [K9]; 1xTMTpro_zero [N-Term]	0	0.0001288	1	-0.31335	22.7846	-1.95884	0.100697	0.619826	-4.93414	1535	1	FALSE
AIELFSVGQGPAK	O70310	1xTMTpro_zero [K13]; 1xTMTpro_zero [N-Term]	0	3.511e-05	1	-0.31279	21.5732	-1.13337	0.302735	0.917701	-5.95061	1536	1	FALSE
AIEMLGGELGSK	P97807	1xTMTpro_zero [K12]; 1xTMTpro_zero [N-Term]	0	3.511e-05	2	-0.312584	20.9031	-1.85325	0.116175	0.663962	-5.07429	1537	1	FALSE
LWEELQSTAK	P15508	1xTMTpro_zero [K10]; 1xTMTpro_zero [N-Term]	0	0.001254	2	-0.312584	20.9031	-1.85325	0.116175	0.663962	-5.07429	1538	1	FALSE
VVAITAEK	Q8BFS6	1xTMTpro_zero [K8]; 1xTMTpro_zero [N-Term]	0	0.001925	1	-0.312316	20.4592	-2.14363	0.0784755	0.548343	-4.68604	1539	1	FALSE
LQQQSSQAAQELAAEK	Q8BL66	1xTMTpro_zero [K16]; 1xTMTpro_zero [N-Term]	0	3.511e-05	2	-0.311581	21.2299	-1.53212	0.179263	0.793096	-5.48722	1540	1	FALSE
EKIEGCHICTSVTPGEPQVFLGK	Q9QXL2	2xCarbamidomethyl [C6; C9]; 2xTMTpro_zero [K2; K23]; 1xTMTpro_zero [N-Term]	1	0.0001288	3	-0.311568	21.9715	-1.15039	0.296221	0.911772	-5.93243	1541	1	FALSE
FPYLCGK	P31648	1xCarbamidomethyl [C5]; 1xTMTpro_zero [K7]; 1xTMTpro_zero [N-Term]	0	0.0009427	0	-0.311191	24.7759	-1.9916	0.0963326	0.608313	-4.89037	1542	1	FALSE
SLLVAGAAQYDCFFQHLR	Q8BRT1	1xCarbamidomethyl [C12]; 1xTMTpro_zero [N-Term]	0	3.511e-05	1	-0.311165	21.32	-0.954038	0.378981	0.961157	-6.1313	1543	1	FALSE
EAEYFQLPDLVK	Q5DTY9	1xTMTpro_zero [K12]; 1xTMTpro_zero [N-Term]	0	3.511e-05	3	-0.310876	23.5224	-1.53169	0.179366	0.793096	-5.48775	1544	1	FALSE
EDSSSVK	Q5SV85	1xTMTpro_zero [K7]; 1xTMTpro_zero [N-Term]	0	0.0006445	2	-0.310374	21.6746	-1.82856	0.120127	0.67544	-5.10682	1545	1	FALSE
QNISPDKIPWSALK	Q9JHU4	2xTMTpro_zero [K7; K14]; 1xTMTpro_zero [N-Term]	1	0.001692	1	-0.310311	20.7423	-1.25475	0.258853	0.881977	-5.8174	1546	1	FALSE
DYFNVPYPLPK	Q11011	1xTMTpro_zero [K11]; 1xTMTpro_zero [N-Term]	0	0.0001288	1	-0.310281	22.4205	-0.378638	0.718739	0.999197	-6.53667	1547	1	FALSE
AHLVAVFNEYQR	P97384	1xTMTpro_zero [N-Term]	0	0.0001225	1	-0.310013	23.7139	-1.56461	0.171609	0.782403	-5.44666	1548	1	FALSE
SGETSQASAVGK	Q8C8R3	1xTMTpro_zero [K12]; 1xTMTpro_zero [N-Term]	0	3.511e-05	1	-0.309933	21.301	-1.72241	0.138697	0.716678	-5.24542	1549	1	FALSE
LIGPNCPGVINPGECK	Q9WUM5	2xCarbamidomethyl [C6; C15]; 1xTMTpro_zero [K16]; 1xTMTpro_zero [N-Term]	0	3.511e-05	1	-0.309688	20.7891	-0.776667	0.468533	0.999197	-6.28748	1550	1	FALSE
HGGEDYVFSLLTGYCEPPTGVSLR	Q9D0M3	1xCarbamidomethyl [C15]; 1xTMTpro_zero [N-Term]	0	3.511e-05	3	-0.309646	21.5099	-1.89188	0.110253	0.644959	-5.0232	1551	1	FALSE
EGIDPAPYYWYTDQR	Q8BP47	1xTMTpro_zero [N-Term]	0	0.0001225	3	-0.309601	20.6055	-2.12944	0.0799871	0.551534	-4.70517	1552	1	FALSE
YPLLLDNIAK	Q8R4H2	1xTMTpro_zero [K10]; 1xTMTpro_zero [N-Term]	0	0.0001288	1	-0.308779	20.3176	-1.95731	0.100906	0.620662	-4.93618	1553	1	FALSE
IVELSEANK	P49025	1xTMTpro_zero [K9]; 1xTMTpro_zero [N-Term]	0	3.511e-05	2	-0.308444	21.9354	-2.07154	0.086475	0.575879	-4.78314	1554	1	FALSE
SGSLSNVAGGR	Q6P9K8	1xTMTpro_zero [N-Term]	0	3.511e-05	0	-0.308389	22.65	-1.95321	0.101467	0.621817	-4.94165	1555	1	FALSE
AESWKPADTEGK	Q80XI3	2xTMTpro_zero [K5; K12]; 1xTMTpro_zero [N-Term]	0	0.0001288	3	-0.307574	21.347	-1.61819	0.159666	0.762696	-5.37908	1556	1	FALSE
WGDIEFPPPFGR	Q91V92	1xTMTpro_zero [N-Term]	0	0.0002861	2	-0.307503	21.3164	-1.4848	0.190993	0.809682	-5.54568	1557	1	FALSE
NVTAIQGPGGK	Q9D6R2	1xTMTpro_zero [K11]; 1xTMTpro_zero [N-Term]	0	3.511e-05	0	-0.307229	23.816	-2.02337	0.0922842	0.595181	-4.84783	1558	1	FALSE
TSEQYETLLIETASSLVK	D3YVF0	1xTMTpro_zero [K18]; 1xTMTpro_zero [N-Term]	0	3.511e-05	3	-0.306973	21.211	-0.840758	0.434529	0.989211	-6.23389	1559	1	FALSE
GPIVPLNVADQK	P55012	1xTMTpro_zero [K12]; 1xTMTpro_zero [N-Term]	0	3.511e-05	1	-0.306799	23.7561	-2.16277	0.0764832	0.540395	-4.66021	1560	1	FALSE
KQEVQAWDGEVR	P56399	1xTMTpro_zero [K1]; 1xTMTpro_zero [N-Term]	1	3.511e-05	3	-0.306502	24.3451	-1.10517	0.313802	0.923474	-5.98038	1561	1	FALSE
LLDGLEVTAR	Q8C079	1xTMTpro_zero [N-Term]	0	0.0002861	2	-0.306161	21.3526	-1.78091	0.128137	0.692494	-5.16932	1562	1	FALSE
LPQPPTHR	Q9JHU4	1xTMTpro_zero [N-Term]	0	0.003	0	-0.306018	24.7388	-1.83241	0.119503	0.673211	-5.10177	1563	1	FALSE
DSSSSSLR	Q9QYX7	1xTMTpro_zero [N-Term]	0	0.002403	1	-0.305647	21.8718	-1.87891	0.112206	0.652246	-5.04038	1564	1	FALSE
QGQQQAGGDGK	Q8VEK3	1xTMTpro_zero [K11]; 1xTMTpro_zero [N-Term]	0	3.511e-05	1	-0.305431	21.518	-1.79873	0.125081	0.685322	-5.14599	1565	1	FALSE
GEEESEEDSYDPR	O88737	1xTMTpro_zero [N-Term]	0	3.511e-05	7	-0.305047	23.5823	-1.45061	0.199913	0.822909	-5.58742	1566	1	FALSE
CDDGWFVGTSR	Q3UTJ2; Q62417	1xCarbamidomethyl [C1]; 1xTMTpro_zero [N-Term]	0	0.0001452	2	-0.304984	21.5411	-2.13371	0.0795297	0.550243	-4.69942	1567	1	FALSE
VCVSLLGTWIGK	Q6ZPJ3	1xCarbamidomethyl [C2]; 1xTMTpro_zero [K12]; 1xTMTpro_zero [N-Term]	0	3.511e-05	0	-0.304467	19.7579	-1.45408	0.19899	0.821054	-5.5832	1568	1	FALSE
VQELEAALATAR	Q8CGU1	1xTMTpro_zero [N-Term]	0	0.0001452	2	-0.304362	20.1244	-1.514	0.183671	0.799861	-5.50969	1569	1	FALSE
LVLAVQDVAQVNEENLPTYNR	Q6ZQ18	1xTMTpro_zero [N-Term]	0	3.511e-05	3	-0.303743	21.739	-0.563849	0.594456	0.999197	-6.43979	1570	1	FALSE
DSSSSSDFSSR	Q8C1B1	1xTMTpro_zero [N-Term]	0	0.0009105	2	-0.303624	20.3722	-2.11632	0.0814118	0.558752	-4.72286	1571	1	FALSE
LTGLHK	Q62261	1xTMTpro_zero [K6]; 1xTMTpro_zero [N-Term]	0	0.00136	0	-0.303241	26.4716	-2.13683	0.0791969	0.550216	-4.69522	1572	1	FALSE
TPAAVLPTPVAVSQPIR	Q9QZQ1	1xTMTpro_zero [N-Term]	0	3.511e-05	0	-0.303131	22.1381	-1.65071	0.152812	0.748725	-5.33767	1573	1	FALSE
LWLFGYDEQR	Q9CPX6	1xTMTpro_zero [N-Term]	0	0.0001288	2	-0.303009	21.6368	-1.35822	0.225991	0.855082	-5.69798	1574	1	FALSE
AGLQTADK	Q8K2K6	1xTMTpro_zero [K8]; 1xTMTpro_zero [N-Term]	0	0.001331	1	-0.302972	21.8002	-1.4107	0.210817	0.835876	-5.6356	1575	1	FALSE
SDSAFFWEER	P70336	1xTMTpro_zero [N-Term]	0	0.0001288	3	-0.302795	21.6274	-1.70637	0.14174	0.724627	-5.26617	1576	1	FALSE
IADLGNACWVHK	O54781	1xCarbamidomethyl [C8]; 1xTMTpro_zero [K12]; 1xTMTpro_zero [N-Term]	0	3.511e-05	1	-0.30247	22.0227	-1.9505	0.10184	0.623004	-4.94527	1577	1	FALSE
GADQEYSAFR	P23819	1xTMTpro_zero [N-Term]	0	3.511e-05	2	-0.302337	22.8301	-1.50122	0.186841	0.802144	-5.52547	1578	1	FALSE
RSENEEFVEVGR	Q9DBC7	1xTMTpro_zero [N-Term]	1	0.002403	4	-0.302268	22.6913	-1.72903	0.13746	0.714041	-5.23685	1579	1	FALSE
IVDFGSSCQLGQR	Q9Z188	1xCarbamidomethyl [C8]; 1xTMTpro_zero [N-Term]	0	3.511e-05	1	-0.301832	20.281	-1.37728	0.220368	0.847405	-5.67546	1580	1	FALSE
VDAKPEVQSQPPR	P97379	1xTMTpro_zero [K4]; 1xTMTpro_zero [N-Term]	0	3.511e-05	2	-0.301672	23.2284	-1.6687	0.149144	0.739075	-5.31464	1581	1	FALSE
AAVAWEAGKPLSIEEIEVAPPK	P28474	2xTMTpro_zero [K9; K22]; 1xTMTpro_zero [N-Term]	0	0.0001452	4	-0.301644	20.7352	-1.28342	0.249344	0.873771	-5.78482	1582	1	FALSE
VQVTSQEYSAR	P12960	1xTMTpro_zero [N-Term]	0	3.511e-05	1	-0.301586	22.8831	-1.8003	0.124816	0.685181	-5.14394	1583	1	FALSE
LPANHPLLTGQR	P50516	1xTMTpro_zero [N-Term]	0	0.0002306	0	-0.301482	26.4422	-1.12886	0.304482	0.919503	-5.9554	1584	1	FALSE
SVEAEPK	Q91XL9	1xTMTpro_zero [K7]; 1xTMTpro_zero [N-Term]	0	0.0002996	2	-0.301429	22.037	-1.67917	0.14705	0.734954	-5.30121	1585	1	FALSE
GLEESITR	Q9Z0P4	1xTMTpro_zero [N-Term]	0	0.0002861	2	-0.300968	24.9257	-1.52937	0.179925	0.793096	-5.49063	1586	1	FALSE
LEAGDYADLVK	A2AGT5	1xTMTpro_zero [K11]; 1xTMTpro_zero [N-Term]	0	0.000162	3	-0.30072	21.4589	-1.34882	0.228813	0.857014	-5.70903	1587	1	FALSE
LTGPGDKDR	P60469	1xTMTpro_zero [K7]; 1xTMTpro_zero [N-Term]	1	0.00107	2	-0.30061	22.1919	-1.37294	0.221636	0.850401	-5.6806	1588	1	FALSE
WVSIFSNDGK	Q9ESN6	1xTMTpro_zero [K10]; 1xTMTpro_zero [N-Term]	0	0.0001225	1	-0.30056	21.9151	-1.96152	0.100333	0.619414	-4.93057	1589	1	FALSE
DPALLAVIPK	Q924C1	1xTMTpro_zero [K10]; 1xTMTpro_zero [N-Term]	0	3.511e-05	1	-0.299983	19.8506	-1.64738	0.153501	0.74945	-5.34192	1590	1	FALSE
QNSATESAESIEIYIPEAQTR	Q9D415	1xTMTpro_zero [N-Term]	0	3.511e-05	4	-0.298892	21.5955	-1.66679	0.149529	0.739759	-5.31708	1591	1	FALSE
ELGVGQVDWGDDLGLR	P58871	1xTMTpro_zero [N-Term]	0	3.511e-05	4	-0.298487	21.8064	-1.29285	0.246283	0.869841	-5.77401	1592	1	FALSE
LLGLNELDDLLGK	Q68FH0	1xTMTpro_zero [K13]; 1xTMTpro_zero [N-Term]	0	3.511e-05	3	-0.29826	19.6885	-1.41173	0.210529	0.835614	-5.63436	1593	1	FALSE
IQACTQQGLSSK	E9Q8I9	1xCarbamidomethyl [C4]; 1xTMTpro_zero [K12]; 1xTMTpro_zero [N-Term]	0	0.0001225	0	-0.298177	21.1221	-1.79761	0.125271	0.685322	-5.14746	1594	1	FALSE
IVDDEEYEK	Q8K596	1xTMTpro_zero [K9]; 1xTMTpro_zero [N-Term]	0	0.0001452	5	-0.297993	24.8132	-1.17172	0.288223	0.905498	-5.9094	1595	1	FALSE
YSDFEWLR	O70492	1xTMTpro_zero [N-Term]	0	0.001993	2	-0.297565	21.0274	-1.53443	0.178708	0.792273	-5.48434	1596	1	FALSE
AAHDLLDIEGEPALDCRPIQETTDSISSR	Q9QXZ0	1xCarbamidomethyl [C16]; 1xTMTpro_zero [N-Term]	0	0.0002306	7	-0.29752	21.0065	-0.672893	0.527494	0.999197	-6.36689	1597	1	FALSE
QGTSGDSFFDLLK	Q8C0T5	1xTMTpro_zero [K13]; 1xTMTpro_zero [N-Term]	0	3.511e-05	2	-0.297332	20.8423	-0.712623	0.504358	0.999197	-6.3376	1598	1	FALSE
TSDLIVLGLPWK	Q921F2	1xTMTpro_zero [K12]; 1xTMTpro_zero [N-Term]	0	0.000162	1	-0.296868	20.0023	-1.69469	0.143995	0.728141	-5.28123	1599	1	FALSE
DNLTLWTSDSAGEECDAAEGAEN	P68254	1xCarbamidomethyl [C15]; 1xTMTpro_zero [N-Term]	0	0.0001288	7	-0.296707	22.2728	-2.07283	0.0863248	0.575326	-4.78141	1600	1	FALSE
SVSAFAPICNPVLCSWGK	Q9R0P3	2xCarbamidomethyl [C9; C14]; 1xTMTpro_zero [K18]; 1xTMTpro_zero [N-Term]	0	3.511e-05	0	-0.296666	21.2624	-1.95162	0.101685	0.62233	-4.94377	1601	1	FALSE
QEQVEMESLAK	Q8CAQ8	1xTMTpro_zero [K11]; 1xTMTpro_zero [N-Term]	0	0.0001288	3	-0.296659	19.8215	-1.09637	0.317324	0.925183	-5.98957	1602	1	FALSE
ITGIEPLPGENK	Q6NVE8	1xTMTpro_zero [K12]; 1xTMTpro_zero [N-Term]	0	0.0001452	2	-0.296441	20.5853	-1.18232	0.284317	0.90261	-5.89785	1603	1	FALSE
ACVPGCPATEPSPASFLR	Q6ZPE2	2xCarbamidomethyl [C2; C6]; 1xTMTpro_zero [N-Term]	0	0.0002861	1	-0.29625	20.5407	-1.47301	0.194026	0.814547	-5.56012	1604	1	FALSE
SFQNTVDLVIQR	Q80TE7	1xTMTpro_zero [N-Term]	0	3.511e-05	1	-0.295888	21.5194	-0.997313	0.359288	0.946655	-6.08964	1605	1	FALSE
VAVCDIPPR	Q9ERD7; Q922F4	1xCarbamidomethyl [C4]; 1xTMTpro_zero [N-Term]	0	3.511e-05	1	-0.295214	26.0812	-0.835604	0.437195	0.991129	-6.23832	1606	1	FALSE
SVETDSSTVEHVR	Q5SQX6	1xTMTpro_zero [N-Term]	0	3.511e-05	3	-0.295176	22.363	-1.73561	0.136242	0.711127	-5.22831	1607	1	FALSE
KPEQPYQWLSYQEVAK	Q91WC3	2xTMTpro_zero [K1; K16]; 1xTMTpro_zero [N-Term]	0	3.511e-05	2	-0.294846	21.9701	-1.65369	0.152197	0.747018	-5.33385	1608	1	FALSE
TQEQCVHNETK	P58281	1xCarbamidomethyl [C5]; 1xTMTpro_zero [K11]; 1xTMTpro_zero [N-Term]	0	3.511e-05	2	-0.294786	20.214	-1.78213	0.127924	0.692494	-5.16771	1609	1	FALSE
TLDNVAIAEEEK	Q6ZPJ3	1xTMTpro_zero [K12]; 1xTMTpro_zero [N-Term]	0	3.511e-05	4	-0.294106	21.4543	-1.69353	0.144222	0.728445	-5.28273	1610	1	FALSE
GHLENNPALEK	P14869	1xTMTpro_zero [K11]; 1xTMTpro_zero [N-Term]	0	3.511e-05	2	-0.294093	21.926	-1.39537	0.215148	0.841411	-5.65393	1611	1	FALSE
ASILNTWISLK	Q9DCL9	1xTMTpro_zero [K11]; 1xTMTpro_zero [N-Term]	0	0.0001288	0	-0.293957	19.824	-1.76804	0.13039	0.695999	-5.18612	1612	1	FALSE
YCVLASLDER	Q9JLN9	1xCarbamidomethyl [C2]; 1xTMTpro_zero [N-Term]	0	0.00189	2	-0.293193	20.2553	-1.4074	0.211742	0.836024	-5.63955	1613	1	FALSE
DLYQMSDSQLYEAFTFLK	P97427	1xTMTpro_zero [K18]; 1xTMTpro_zero [N-Term]	0	3.511e-05	3	-0.293092	22.3685	-2.06976	0.0866832	0.576914	-4.78554	1614	1	FALSE
HPHDIIDDINSGAVECPAS	P35979	1xCarbamidomethyl [C16]; 1xTMTpro_zero [N-Term]	0	3.511e-05	4	-0.292957	21.8767	-1.5719	0.169935	0.780557	-5.43752	1615	1	FALSE
DVGSSAWAAGPSVVEEK	Q8R3Q2	1xTMTpro_zero [K17]; 1xTMTpro_zero [N-Term]	0	3.511e-05	3	-0.292765	21.5738	-1.86542	0.114276	0.657672	-5.05822	1616	1	FALSE
LPLQLDDAIRPEVEGEEDGR	Q922B2	1xTMTpro_zero [N-Term]	0	0.0007223	7	-0.292673	21.9816	-2.06129	0.0876796	0.581672	-4.79693	1617	1	FALSE
QVVVCGYGEVGK	Q80SW1; Q68FL4	1xCarbamidomethyl [C5]; 1xTMTpro_zero [K12]; 1xTMTpro_zero [N-Term]	0	3.511e-05	1	-0.291959	22.8289	-1.75926	0.13195	0.700196	-5.19757	1618	1	FALSE
SQDQWDGVGPLPDCAEPPK	O35927	1xCarbamidomethyl [C14]; 1xTMTpro_zero [K19]; 1xTMTpro_zero [N-Term]	0	3.511e-05	4	-0.291822	22.4857	-1.75851	0.132083	0.700196	-5.19854	1619	1	FALSE
WSGLLVTVGEVLEK	Q3UPH1	1xTMTpro_zero [K14]; 1xTMTpro_zero [N-Term]	0	0.0007754	2	-0.291817	19.1044	-1.00486	0.355937	0.946655	-6.08224	1620	1	FALSE
EEASDYLELDTIK	P08113	1xTMTpro_zero [K13]; 1xTMTpro_zero [N-Term]	0	3.511e-05	5	-0.291815	22.6097	-1.55343	0.174206	0.787261	-5.46065	1621	1	FALSE
GEAACQELLR	Q9D1X0	1xCarbamidomethyl [C5]; 1xTMTpro_zero [N-Term]	0	0.0001288	2	-0.291784	22.0872	-2.05859	0.0879995	0.58296	-4.80056	1622	1	FALSE
AALAHSEIATTQAASTK	Q9QXS1	1xTMTpro_zero [K17]; 1xTMTpro_zero [N-Term]	0	3.511e-05	1	-0.29149	23.8004	-1.52903	0.180008	0.793096	-5.49106	1623	1	FALSE
SSAAQAIHPGYGFLSENMEFAELCK	Q99MR8	1xCarbamidomethyl [C24]; 1xTMTpro_zero [K25]; 1xTMTpro_zero [N-Term]	0	3.511e-05	3	-0.291309	23.049	-1.35792	0.22608	0.855082	-5.69833	1624	1	FALSE
SQNPPQSK	Q9Z0H4	1xTMTpro_zero [K8]; 1xTMTpro_zero [N-Term]	0	0.0008863	0	-0.291295	22.1566	-1.73504	0.136347	0.711141	-5.22905	1625	1	FALSE
QQLQQK	Q9WTI7	1xTMTpro_zero [K6]; 1xTMTpro_zero [N-Term]	0	0.002976	0	-0.290538	20.2177	-1.96632	0.0996838	0.617487	-4.92416	1626	1	FALSE
IETDYWPCPPSLAVVETEWR	Q9WV69	1xCarbamidomethyl [C8]; 1xTMTpro_zero [N-Term]	0	3.511e-05	4	-0.290409	22.9115	-1.4653	0.196033	0.817342	-5.56953	1627	1	FALSE
ILGPQGNTIK	Q60749	1xTMTpro_zero [K10]; 1xTMTpro_zero [N-Term]	0	0.001983	0	-0.290225	21.9881	-1.88019	0.112012	0.651683	-5.03868	1628	1	FALSE
LLSQEEGEYFNVPVPPEGSEGNEELR	P68404	1xTMTpro_zero [N-Term]	0	3.511e-05	7	-0.289731	25.9479	-1.60407	0.162733	0.769138	-5.39697	1629	1	FALSE
EVYQPGSVLDFPR	P36916	1xTMTpro_zero [N-Term]	0	6.323e-05	2	-0.289694	22.4462	-0.660393	0.534915	0.999197	-6.37581	1630	1	FALSE
GSAITGPVAK	P62830	1xTMTpro_zero [K10]; 1xTMTpro_zero [N-Term]	0	3.511e-05	0	-0.289656	20.8903	-1.73596	0.136177	0.711057	-5.22786	1631	1	FALSE
CITDPQTGLCLLPLK	Q9QXS1	2xCarbamidomethyl [C1; C10]; 1xTMTpro_zero [K15]; 1xTMTpro_zero [N-Term]	0	3.511e-05	1	-0.289352	22.3918	-1.77266	0.129576	0.694975	-5.18009	1632	1	FALSE
AIEPQVVGFSGLSDDK	Q8CI32	1xTMTpro_zero [K16]; 1xTMTpro_zero [N-Term]	0	0.0001288	3	-0.289231	20.3905	-1.43572	0.203917	0.829181	-5.60546	1633	1	FALSE
NDFMGSLSFGISELQK	P68404	1xOxidation [M4]; 1xTMTpro_zero [K16]; 1xTMTpro_zero [N-Term]	0	3.511e-05	2	-0.289164	21.6055	-0.420396	0.689674	0.999197	-6.51792	1634	1	FALSE
NDYVAAER	Q9CWZ7	1xTMTpro_zero [N-Term]	0	0.0001288	2	-0.289017	22.6971	-1.68733	0.145435	0.731914	-5.2907	1635	1	FALSE
VEQDLAMGTDAEGEK	O08599	1xOxidation [M7]; 1xTMTpro_zero [K15]; 1xTMTpro_zero [N-Term]	0	3.511e-05	5	-0.28882	25.857	-1.09581	0.317548	0.925183	-5.99015	1636	1	FALSE
TVCGTPGYCAPEILR	P08414	2xCarbamidomethyl [C3; C9]; 1xTMTpro_zero [N-Term]	0	3.511e-05	1	-0.288767	22.1691	-1.99549	0.0958274	0.607046	-4.88517	1637	1	FALSE
ETISLQMEEFNTAIYSNDDLLSSK	Q99P72	1xTMTpro_zero [K24]; 1xTMTpro_zero [N-Term]	0	3.511e-05	5	-0.28846	19.7978	-0.637447	0.548712	0.999197	-6.39181	1638	1	FALSE
INAANIATDDER	P14231	1xTMTpro_zero [N-Term]	0	3.511e-05	3	-0.288382	22.5667	-1.10119	0.315392	0.923588	-5.98454	1639	1	FALSE
AVIFCLSADKK	Q9R0P5	1xCarbamidomethyl [C5]; 2xTMTpro_zero [K10; K11]; 1xTMTpro_zero [N-Term]	1	0.0001288	1	-0.288044	23.8006	-1.28206	0.249785	0.874518	-5.78636	1640	1	FALSE
TGLTTLAQAVQAGYEVTVLVR	Q923D2	1xTMTpro_zero [N-Term]	0	0.001411	1	-0.287811	23.6042	-1.15946	0.292797	0.908071	-5.92267	1641	1	FALSE
ASVCAEAYNPDEEEDDAESR	P31324	1xCarbamidomethyl [C4]; 1xTMTpro_zero [N-Term]	0	3.511e-05	8	-0.287791	22.8274	-1.52911	0.179989	0.793096	-5.49096	1642	1	FALSE
DTGGDGQDSLYK	A2AWA9	1xTMTpro_zero [K12]; 1xTMTpro_zero [N-Term]	0	6.323e-05	3	-0.287696	20.9559	-1.50304	0.186387	0.802144	-5.52323	1643	1	FALSE
LLQSVGQAPESISEK	Q8VBW6	1xTMTpro_zero [K15]; 1xTMTpro_zero [N-Term]	0	3.511e-05	2	-0.287592	20.5862	-1.17143	0.28833	0.905632	-5.90971	1644	1	FALSE
QQLAAYQEEAER	Q9Z2Y3	1xTMTpro_zero [N-Term]	0	3.511e-05	3	-0.287435	22.3291	-1.55724	0.173318	0.786034	-5.45589	1645	1	FALSE
TGSESSQTGASATSGR	Q8BGD9	1xTMTpro_zero [N-Term]	0	3.511e-05	1	-0.287349	20.5835	-1.69894	0.143171	0.727227	-5.27575	1646	1	FALSE
YLCDAQQCADVIWQYGLLK	O89112	2xCarbamidomethyl [C3; C8]; 1xTMTpro_zero [K19]; 1xTMTpro_zero [N-Term]	0	3.511e-05	2	-0.287031	21.2889	-1.13975	0.300278	0.914204	-5.94381	1647	1	FALSE
STVDEK	P47809	1xTMTpro_zero [K6]; 1xTMTpro_zero [N-Term]	0	0.002382	2	-0.28688	21.7062	-1.83089	0.119748	0.673858	-5.10376	1648	1	FALSE
GASPVPESSLTADLLSVDAFAAPSPASTASPAK	Q61548	1xTMTpro_zero [K33]; 1xTMTpro_zero [N-Term]	0	3.511e-05	3	-0.286403	24.43	-1.3388	0.231854	0.859257	-5.72076	1649	1	FALSE
IFVGGLSANTVVEDVK	Q920Q6	1xTMTpro_zero [K16]; 1xTMTpro_zero [N-Term]	0	0.0002861	2	-0.28617	19.4917	-1.66018	0.150871	0.742606	-5.32556	1650	1	FALSE
LTGGANWQPK	Q61548	1xTMTpro_zero [K10]; 1xTMTpro_zero [N-Term]	0	3.511e-05	0	-0.285962	23.2874	-1.71099	0.140856	0.722733	-5.26019	1651	1	FALSE
GNYGLLDQIQALR	Q69ZK9; Q8BYM5	1xTMTpro_zero [N-Term]	0	3.511e-05	1	-0.285936	20.2004	-1.41382	0.209944	0.835351	-5.63185	1652	1	FALSE
EVLEEISCYPENNDAK	O70589	1xCarbamidomethyl [C8]; 1xTMTpro_zero [K16]; 1xTMTpro_zero [N-Term]	0	3.511e-05	5	-0.285435	21.4049	-1.77723	0.128776	0.692993	-5.17412	1653	1	FALSE
IATVGYLPTQQDVLR	P21278	1xTMTpro_zero [N-Term]	0	3.511e-05	1	-0.285351	22.5394	-1.95572	0.101124	0.620806	-4.93831	1654	1	FALSE
NLEPEWAAAATEVK	Q922R8	1xTMTpro_zero [K14]; 1xTMTpro_zero [N-Term]	0	0.002029	3	-0.285316	21.0295	-1.12484	0.306047	0.920823	-5.95966	1655	1	FALSE
QDLPNAEEKPR	Q61699	1xTMTpro_zero [K9]; 1xTMTpro_zero [N-Term]	0	0.001993	3	-0.285118	22.1414	-1.38649	0.217697	0.844328	-5.66452	1656	1	FALSE
GEQSTGENSLEDLTK	Q9QWY8	1xTMTpro_zero [K15]; 1xTMTpro_zero [N-Term]	0	3.511e-05	4	-0.285116	22.7844	-1.99481	0.0959157	0.607046	-4.88608	1657	1	FALSE
HKQEDIPISGWAVECR	Q91ZA3	1xCarbamidomethyl [C15]; 1xTMTpro_zero [K2]; 1xTMTpro_zero [N-Term]	1	3.511e-05	3	-0.285111	26.2604	-1.14296	0.299049	0.913927	-5.94038	1658	1	FALSE
HEANNLQLK	Q60864	1xTMTpro_zero [K9]; 1xTMTpro_zero [N-Term]	0	3.511e-05	1	-0.284999	22.9101	-1.10292	0.3147	0.923588	-5.98273	1659	1	FALSE
QLYIYPGCDAGIR	Q9EPN1	1xCarbamidomethyl [C8]; 1xTMTpro_zero [N-Term]	0	0.0001452	1	-0.284728	21.6543	-1.6507	0.152814	0.748725	-5.33768	1660	1	FALSE
DSQDAGGFGPEDR	Q9QXS1	1xTMTpro_zero [N-Term]	0	3.511e-05	4	-0.284722	23.3499	-1.72521	0.138172	0.714869	-5.24179	1661	1	FALSE
LTTALQESAASVEQWK	Q9QWW1	1xTMTpro_zero [K16]; 1xTMTpro_zero [N-Term]	0	0.000162	2	-0.284696	19.9004	-1.35009	0.22843	0.857014	-5.70754	1662	1	FALSE
VIDDEEYEK	P70414	1xTMTpro_zero [K9]; 1xTMTpro_zero [N-Term]	0	3.511e-05	5	-0.284688	24.9891	-1.11936	0.30819	0.923183	-5.96546	1663	1	FALSE
IVDSGVQTDDEETADR	Q9QYX7	1xTMTpro_zero [N-Term]	0	3.511e-05	6	-0.284573	24.1089	-1.76856	0.130297	0.695974	-5.18543	1664	1	FALSE
LLCSITGGTSPAQWEDITGTTPLTFIK	G5E8K5	1xCarbamidomethyl [C3]; 1xTMTpro_zero [K27]; 1xTMTpro_zero [N-Term]	0	3.511e-05	2	-0.284511	22.3543	-1.48565	0.190775	0.809005	-5.54463	1665	1	FALSE
IGIIGGTGLDDPEILEGR	Q9CQ65	1xTMTpro_zero [N-Term]	0	0.0001793	4	-0.284316	19.7088	-1.52908	0.179995	0.793096	-5.49099	1666	1	FALSE
ILTDEAVSGWK	P70398	1xTMTpro_zero [K11]; 1xTMTpro_zero [N-Term]	0	3.511e-05	2	-0.284074	23.2655	-1.75904	0.131989	0.700196	-5.19785	1667	1	FALSE
ESQLQEADSQVDLVR	Q6ZQ82	1xTMTpro_zero [N-Term]	0	3.511e-05	4	-0.284032	20.5222	-1.54987	0.175042	0.788899	-5.4651	1668	1	FALSE
NATNEQDLANR	Q61301	1xTMTpro_zero [N-Term]	0	3.511e-05	2	-0.283791	21.6743	-1.91866	0.106325	0.634616	-4.98765	1669	1	FALSE
EALLGVQEDVDEYVK	Q8BP92	1xTMTpro_zero [K15]; 1xTMTpro_zero [N-Term]	0	3.511e-05	5	-0.283668	21.0586	-1.48708	0.19041	0.807952	-5.54287	1670	1	FALSE
LSDFGFCAQVSK	Q8C015	1xCarbamidomethyl [C7]; 1xTMTpro_zero [K12]; 1xTMTpro_zero [N-Term]	0	0.0001452	1	-0.283636	22.1257	-0.504683	0.632805	0.999197	-6.47454	1671	1	FALSE
QENTIIENPDAPQEFR	Q3UGY8	1xTMTpro_zero [N-Term]	0	0.0002209	4	-0.283567	20.2692	-1.82208	0.121187	0.678654	-5.11535	1672	1	FALSE
TGSYGALAEISASK	Q9DBR7	1xTMTpro_zero [K14]; 1xTMTpro_zero [N-Term]	0	0.000162	1	-0.283488	20.1225	-1.17564	0.286772	0.904931	-5.90513	1673	1	FALSE
TPGDTEGATAEAAK	B9EJA2	1xTMTpro_zero [K14]; 1xTMTpro_zero [N-Term]	0	3.511e-05	3	-0.283394	21.4677	-1.82479	0.120741	0.677341	-5.11178	1674	1	FALSE
NQTAEK	P63017	1xTMTpro_zero [K6]; 1xTMTpro_zero [N-Term]	0	0.002225	1	-0.283323	21.5497	-1.97102	0.0990518	0.617052	-4.91789	1675	1	FALSE
FVSCLLEQPEVSVTGAGR	Q80UJ7	1xCarbamidomethyl [C4]; 1xTMTpro_zero [N-Term]	0	3.511e-05	2	-0.283214	21.5783	-1.63874	0.1553	0.752787	-5.35293	1676	1	FALSE
LPQGSLVPYQPDAVEK	Q8R123	1xTMTpro_zero [K16]; 1xTMTpro_zero [N-Term]	0	3.511e-05	2	-0.283196	20.8846	-1.49614	0.188118	0.804516	-5.53174	1677	1	FALSE
LLTELETPSWWPFGSK	Q8R570	1xTMTpro_zero [K16]; 1xTMTpro_zero [N-Term]	0	3.511e-05	2	-0.283128	20.9929	-1.56698	0.171064	0.781933	-5.44369	1678	1	FALSE
DVPALEITHTFLER	Q64133	1xTMTpro_zero [N-Term]	0	3.511e-05	3	-0.283074	21.412	-1.62387	0.158448	0.761201	-5.37187	1679	1	FALSE
QGTLHVGDEIR	O70589	1xTMTpro_zero [N-Term]	0	3.511e-05	2	-0.283033	22.6639	-1.57712	0.168746	0.779004	-5.43096	1680	1	FALSE
IDSVWPFEK	Q62465	1xTMTpro_zero [K9]; 1xTMTpro_zero [N-Term]	0	0.002029	2	-0.282644	19.729	-1.38595	0.217851	0.844328	-5.66515	1681	1	FALSE
DEVDAAESTPTDR	Q9WV92	1xTMTpro_zero [N-Term]	0	3.511e-05	5	-0.282552	22.9015	-1.93404	0.104134	0.62988	-4.96719	1682	1	FALSE
LTQEPESIR	Q6IRU5	1xTMTpro_zero [N-Term]	0	3.511e-05	2	-0.282395	25.4335	-1.32967	0.234659	0.861904	-5.73142	1683	1	FALSE
EPLAAGK	P14873	1xTMTpro_zero [K7]; 1xTMTpro_zero [N-Term]	0	0.001647	1	-0.282076	23.5849	-1.57733	0.168699	0.779004	-5.43069	1684	1	FALSE
YIVTCAVVQR	P56387	1xCarbamidomethyl [C5]; 1xTMTpro_zero [N-Term]	0	3.511e-05	0	-0.282035	22.4261	-1.57305	0.169672	0.780557	-5.43607	1685	1	FALSE
LCDCPGLIFPSLLPR	P36916	2xCarbamidomethyl [C2; C4]; 1xTMTpro_zero [N-Term]	0	0.001292	1	-0.281755	20.5598	-1.36553	0.223819	0.852191	-5.68936	1686	1	FALSE
ETTGIQIWSEVFLINK	Q8BH66	1xTMTpro_zero [K16]; 1xTMTpro_zero [N-Term]	0	3.511e-05	2	-0.281397	21.8509	-0.877912	0.415669	0.977618	-6.20131	1687	1	FALSE
LQPSSSPETGLDPFPSR	Q7TQH0	1xTMTpro_zero [N-Term]	0	0.0001288	2	-0.281373	22.491	-1.01824	0.350063	0.94362	-6.06903	1688	1	FALSE
VFVANPNK	Q06138	1xTMTpro_zero [K8]; 1xTMTpro_zero [N-Term]	0	0.0007223	0	-0.281055	20.2864	-1.66314	0.150267	0.740267	-5.32176	1689	1	FALSE
WNTDNTLGTEISWENK	Q60931	1xTMTpro_zero [K16]; 1xTMTpro_zero [N-Term]	0	3.511e-05	3	-0.280964	25.3108	-1.74854	0.133878	0.704245	-5.21151	1690	1	FALSE
DAISGVGTDEK	P14824	1xTMTpro_zero [K11]; 1xTMTpro_zero [N-Term]	0	3.511e-05	3	-0.280631	22.2693	-1.57785	0.168581	0.779004	-5.43004	1691	1	FALSE
DPWYQWDHSELR	Q9D6J5	1xTMTpro_zero [N-Term]	0	0.0001793	3	-0.280351	22.6689	-1.97006	0.0991809	0.617052	-4.91917	1692	1	FALSE
FQSSAVMALQEASEAYLVGLFEDTNLCAIHAK	P84228	1xCarbamidomethyl [C27]; 1xTMTpro_zero [K32]; 1xTMTpro_zero [N-Term]	0	3.511e-05	4	-0.280314	20.8969	-1.81655	0.122097	0.679375	-5.12261	1693	1	FALSE
NSLDCEIVSAK	P40124	1xCarbamidomethyl [C5]; 1xTMTpro_zero [K11]; 1xTMTpro_zero [N-Term]	0	6.323e-05	2	-0.280109	22.866	-1.69381	0.144167	0.728431	-5.28236	1694	1	FALSE
VPEAQTGQASDYGLFLSDEDPR	Q71LX4	1xTMTpro_zero [N-Term]	0	0.000162	5	-0.279681	20.7926	-1.6359	0.155896	0.753997	-5.35656	1695	1	FALSE
VNKDNNEIVDK	Q5SSL4	2xTMTpro_zero [K3; K11]; 1xTMTpro_zero [N-Term]	1	3.511e-05	3	-0.279487	22.3805	-1.55252	0.174421	0.787442	-5.4618	1696	1	FALSE
QLAEAHAQAK	Q9QXS1	1xTMTpro_zero [K10]; 1xTMTpro_zero [N-Term]	0	3.511e-05	1	-0.279444	23.017	-1.27743	0.251303	0.874753	-5.79166	1697	1	FALSE
QEDIPISGWAVECR	Q91ZA3	1xCarbamidomethyl [C13]; 1xTMTpro_zero [N-Term]	0	3.511e-05	3	-0.27925	23.9805	-1.82369	0.120922	0.677494	-5.11323	1698	1	FALSE
TLAVDENFLPELPR	Q80TE7	1xTMTpro_zero [N-Term]	0	3.511e-05	3	-0.279184	21.8638	-1.45934	0.197599	0.820493	-5.5768	1699	1	FALSE
EAQSILLEPSQLK	P97412	1xTMTpro_zero [K13]; 1xTMTpro_zero [N-Term]	0	3.511e-05	2	-0.279183	19.7525	-1.53081	0.179579	0.793096	-5.48885	1700	1	FALSE
AVTEGAQAVEEPSIC	Q91VD9	1xCarbamidomethyl [C15]; 1xTMTpro_zero [N-Term]	0	3.511e-05	3	-0.278851	21.5972	-1.91866	0.106326	0.634616	-4.98765	1701	1	FALSE
ELEQIFCQFDSK	Q60597	1xCarbamidomethyl [C7]; 1xTMTpro_zero [K12]; 1xTMTpro_zero [N-Term]	0	0.0001288	3	-0.27868	20.8123	-1.46645	0.195731	0.816574	-5.56813	1702	1	FALSE
ANAEYIK	Q5SWU9	1xTMTpro_zero [K7]; 1xTMTpro_zero [N-Term]	0	0.0003531	1	-0.278679	23.4732	-0.838719	0.435582	0.989669	-6.23564	1703	1	FALSE
AEGEDPGCANQALISK	Q69ZH9	1xCarbamidomethyl [C8]; 1xTMTpro_zero [K16]; 1xTMTpro_zero [N-Term]	0	6.323e-05	3	-0.278401	21.0865	-1.63528	0.156027	0.754367	-5.35735	1704	1	FALSE
NEVPEEK	Q6Q477	1xTMTpro_zero [K7]; 1xTMTpro_zero [N-Term]	0	0.0007754	3	-0.278206	21.8099	-1.07808	0.324752	0.93006	-6.00852	1705	1	FALSE
RGPEVTSQGVQTSSPACK	O70305	1xCarbamidomethyl [C17]; 1xTMTpro_zero [K18]; 1xTMTpro_zero [N-Term]	1	3.511e-05	1	-0.277798	20.9338	-1.80402	0.124188	0.684167	-5.13906	1706	1	FALSE
SYGIPFIETSAK	P08556	1xTMTpro_zero [K12]; 1xTMTpro_zero [N-Term]	0	0.0001288	1	-0.277668	21.0679	-0.870851	0.419206	0.978232	-6.20758	1707	1	FALSE
KTVTYEDPQAVGGLASALDNR	Q5SRX1	1xTMTpro_zero [K1]; 1xTMTpro_zero [N-Term]	1	3.511e-05	3	-0.277166	21.7023	-1.18629	0.282867	0.900678	-5.89352	1708	1	FALSE
VDDDLGTIESLEEAK	Q61879	1xTMTpro_zero [K15]; 1xTMTpro_zero [N-Term]	0	0.0001225	6	-0.276855	20.7616	-0.747854	0.484424	0.999197	-6.31047	1709	1	FALSE
QAETLYK	O88447	1xTMTpro_zero [K7]; 1xTMTpro_zero [N-Term]	0	0.001043	1	-0.27664	21.1096	-1.93459	0.104057	0.62988	-4.96646	1710	1	FALSE
ASVESCIR	P11881	1xCarbamidomethyl [C6]; 1xTMTpro_zero [N-Term]	0	0.0002306	1	-0.275979	22.9314	-1.27964	0.250577	0.874753	-5.78913	1711	1	FALSE
GTAFGGWK	P28474	1xTMTpro_zero [K8]; 1xTMTpro_zero [N-Term]	0	0.0001288	0	-0.275925	21.8133	-0.981496	0.366389	0.952608	-6.10502	1712	1	FALSE
MDSTEPAYSEK	P62631	1xTMTpro_zero [K11]; 1xTMTpro_zero [N-Term]	0	0.0001452	3	-0.275472	24.1204	-1.698	0.143353	0.727227	-5.27697	1713	1	FALSE
DCDPQLLHHLCWGPLR	E9Q3L2	2xCarbamidomethyl [C2; C11]; 1xTMTpro_zero [N-Term]	0	0.0003356	2	-0.275333	21.1437	-0.469888	0.655976	0.999197	-6.49334	1714	1	FALSE
ELAALQGSETPGK	P12657	1xTMTpro_zero [K13]; 1xTMTpro_zero [N-Term]	0	3.511e-05	2	-0.275317	21.2421	-0.936957	0.386985	0.9659	-6.14738	1715	1	FALSE
SEPTQQPEKK	Q8BH66	2xTMTpro_zero [K9; K10]; 1xTMTpro_zero [N-Term]	1	0.003051	2	-0.27492	21.2108	-1.9467	0.102365	0.624565	-4.95033	1716	1	FALSE
VQECSYNR	Q68FH0	1xCarbamidomethyl [C4]; 1xTMTpro_zero [N-Term]	0	0.001292	1	-0.27427	21.359	-1.77721	0.128781	0.692993	-5.17415	1717	1	FALSE
QPCASQSSLK	Q9EPU0	1xCarbamidomethyl [C3]; 1xTMTpro_zero [K10]; 1xTMTpro_zero [N-Term]	0	0.0001288	0	-0.273842	21.5107	-1.28103	0.250123	0.874518	-5.78754	1718	1	FALSE
EEEQPVGER	Q8QZT2	1xTMTpro_zero [N-Term]	0	0.0008085	4	-0.27382	21.1927	-1.92674	0.105168	0.632021	-4.9769	1719	1	FALSE
DLSTALPSGQVCHDQQR	Q9ESJ4	1xCarbamidomethyl [C12]; 1xTMTpro_zero [N-Term]	0	3.511e-05	2	-0.273789	21.4776	-1.20775	0.275139	0.894425	-5.86993	1720	1	FALSE
VTATANLGR	Q9JME5	1xTMTpro_zero [N-Term]	0	0.0001452	0	-0.273459	24.5883	-1.59311	0.165154	0.773219	-5.41082	1721	1	FALSE
STEEPIVK	Q9JLV5	1xTMTpro_zero [K8]; 1xTMTpro_zero [N-Term]	0	0.001513	2	-0.273243	21.0586	-1.92062	0.106044	0.634211	-4.98505	1722	1	FALSE
LEDILSR	Q69ZR2	1xTMTpro_zero [N-Term]	0	0.003194	2	-0.273011	21.0846	-1.38275	0.218778	0.84503	-5.66896	1723	1	FALSE
GLDALSK	E9Q401	1xTMTpro_zero [K7]; 1xTMTpro_zero [N-Term]	0	0.0007542	1	-0.272789	23.1189	-1.45791	0.197975	0.820493	-5.57854	1724	1	FALSE
LISLFQAMK	Q9QXS1	1xTMTpro_zero [K9]; 1xTMTpro_zero [N-Term]	0	6.323e-05	0	-0.272597	20.9542	-1.0518	0.335676	0.934665	-6.03538	1725	1	FALSE
TGETGVEETILEGHLGVTK	P70398	1xTMTpro_zero [K19]; 1xTMTpro_zero [N-Term]	0	3.511e-05	4	-0.272537	22.2085	-1.44179	0.202277	0.827009	-5.59812	1726	1	FALSE
GNPVPQQYVWVK	Q99N28	1xTMTpro_zero [K12]; 1xTMTpro_zero [N-Term]	0	3.511e-05	0	-0.272461	23.761	-1.81153	0.12293	0.68099	-5.1292	1727	1	FALSE
LQACGWSLPAK	Q9ESN9	1xCarbamidomethyl [C4]; 1xTMTpro_zero [K11]; 1xTMTpro_zero [N-Term]	0	3.511e-05	0	-0.272029	20.7773	-1.43782	0.203349	0.828426	-5.60293	1728	1	FALSE
HGNNQPAR	Q8CBW3	1xTMTpro_zero [N-Term]	0	0.0001793	0	-0.272017	20.0794	-1.06093	0.331844	0.933854	-6.02609	1729	1	FALSE
FEGNLNTYK	Q9WUA3	1xTMTpro_zero [K9]; 1xTMTpro_zero [N-Term]	0	0.0002209	1	-0.272011	22.2033	-1.72613	0.138001	0.714869	-5.2406	1730	1	FALSE
DGTGFDCK	Q8BPN8	1xCarbamidomethyl [C7]; 1xTMTpro_zero [K8]; 1xTMTpro_zero [N-Term]	0	0.0001288	2	-0.271845	22.6862	-1.77881	0.128501	0.69256	-5.17205	1731	1	FALSE
CVELDCWK	Q9Z1B3	2xCarbamidomethyl [C1; C6]; 1xTMTpro_zero [K8]; 1xTMTpro_zero [N-Term]	0	0.0001288	2	-0.271627	23.3871	-1.86498	0.114343	0.657672	-5.0588	1732	1	FALSE
IIHEDGYSEEECR	P08752	1xCarbamidomethyl [C12]; 1xTMTpro_zero [N-Term]	0	3.511e-05	5	-0.271298	23.0538	-1.63783	0.155491	0.75334	-5.3541	1733	1	FALSE
GEEATGCAQESQR	Q3UHL1	1xCarbamidomethyl [C7]; 1xTMTpro_zero [N-Term]	0	3.511e-05	3	-0.271243	22.5862	-1.76494	0.130938	0.697043	-5.19016	1734	1	FALSE
SQQYEQAADAELAWVAETK	Q9QXZ0	1xTMTpro_zero [K19]; 1xTMTpro_zero [N-Term]	0	3.511e-05	4	-0.271175	20.9385	-1.38086	0.219327	0.845501	-5.67121	1735	1	FALSE
EQIQAEQCLK	O35551	1xCarbamidomethyl [C8]; 1xTMTpro_zero [K10]; 1xTMTpro_zero [N-Term]	0	3.511e-05	2	-0.27058	20.769	-1.6881	0.145284	0.731683	-5.28971	1736	1	FALSE
YSSTFLDSAWR	Q8K212	1xTMTpro_zero [N-Term]	0	0.002184	1	-0.27047	22.6465	-1.80791	0.123535	0.682025	-5.13395	1737	1	FALSE
VCLVDVEPEALR	O88910	1xCarbamidomethyl [C2]; 1xTMTpro_zero [N-Term]	0	0.0005047	3	-0.270002	21.2388	-1.39514	0.215215	0.841411	-5.65421	1738	1	FALSE
ECVQPATK	O55143	1xCarbamidomethyl [C2]; 1xTMTpro_zero [K8]; 1xTMTpro_zero [N-Term]	0	6.323e-05	1	-0.269715	22.3578	-1.56764	0.170911	0.781494	-5.44286	1739	1	FALSE
VYVIIDLSGSSGEAPK	P16054	1xTMTpro_zero [K16]; 1xTMTpro_zero [N-Term]	0	3.511e-05	2	-0.26928	22.1094	-0.682089	0.522077	0.999197	-6.36024	1740	1	FALSE
VDESWEQSR	Q80U40	1xTMTpro_zero [N-Term]	0	0.0005047	3	-0.26892	21.7708	-1.64866	0.153234	0.749068	-5.34028	1741	1	FALSE
SPILSGPK	Q80Z38	1xTMTpro_zero [K8]; 1xTMTpro_zero [N-Term]	0	0.0002209	0	-0.26882	23.4112	-1.7856	0.127326	0.691408	-5.16319	1742	1	FALSE
YAYLLESTMNEYIEQR	P23818; P23819	1xTMTpro_zero [N-Term]	0	0.0004175	3	-0.268773	21.2618	-1.38208	0.21897	0.845501	-5.66975	1743	1	FALSE
AVAHILGIR	P19096	1xTMTpro_zero [N-Term]	0	3.511e-05	0	-0.26875	23.1358	-1.53966	0.177458	0.79198	-5.47783	1744	1	FALSE
AAGTSGLILK	Q8R071	1xTMTpro_zero [K10]; 1xTMTpro_zero [N-Term]	0	0.0001225	0	-0.26841	22.46	-1.55415	0.174037	0.787245	-5.45975	1745	1	FALSE
WVPENSEIVWSVK	P35585	1xTMTpro_zero [K13]; 1xTMTpro_zero [N-Term]	0	0.0002996	2	-0.268381	20.3091	-1.81676	0.122063	0.679375	-5.12234	1746	1	FALSE
IEPNYPK	Q8BH44	1xTMTpro_zero [K7]; 1xTMTpro_zero [N-Term]	0	0.0003679	1	-0.268196	22.4925	-1.47244	0.194172	0.814595	-5.56081	1747	1	FALSE
VYTLSTAGQYWELCK	Q80VP0	1xCarbamidomethyl [C14]; 1xTMTpro_zero [K15]; 1xTMTpro_zero [N-Term]	0	3.511e-05	1	-0.267971	21.6878	-1.24126	0.263439	0.884597	-5.8326	1748	1	FALSE
GPANYNTCTACK	O88737	2xCarbamidomethyl [C8; C11]; 1xTMTpro_zero [K12]; 1xTMTpro_zero [N-Term]	0	3.511e-05	0	-0.267479	25.0477	-1.55637	0.17352	0.786184	-5.45698	1749	1	FALSE
NEPTTPSWLAEIPPWVPK	Q9QYR6	1xTMTpro_zero [K18]; 1xTMTpro_zero [N-Term]	0	3.511e-05	2	-0.267088	26.0814	-1.78136	0.128059	0.692494	-5.16873	1750	1	FALSE
QNADISAMQDTINKLENELR	P08551	1xTMTpro_zero [K14]; 1xTMTpro_zero [N-Term]	1	0.0001288	4	-0.266792	21.9764	-1.04345	0.339211	0.936281	-6.04382	1751	1	FALSE
AKQEADEEK	Q03137	2xTMTpro_zero [K2; K9]; 1xTMTpro_zero [N-Term]	1	0.0001288	4	-0.266642	21.0893	-1.35105	0.228139	0.857014	-5.70641	1752	1	FALSE
SAEGAPQK	Q91XU3	1xTMTpro_zero [K8]; 1xTMTpro_zero [N-Term]	0	0.0001793	1	-0.266611	22.5325	-1.44511	0.201383	0.825053	-5.59409	1753	1	FALSE
SSTSFDDDAGR	Q9QYX7	1xTMTpro_zero [N-Term]	0	0.00273	3	-0.26655	20.1623	-1.30003	0.243978	0.867222	-5.76576	1754	1	FALSE
CLATEK	P56399	1xCarbamidomethyl [C1]; 1xTMTpro_zero [K6]; 1xTMTpro_zero [N-Term]	0	0.002988	1	-0.266536	25.3107	-1.43939	0.202924	0.828334	-5.60103	1755	1	FALSE
AEACGTLCR	Q8BQZ4	2xCarbamidomethyl [C4; C8]; 1xTMTpro_zero [N-Term]	0	0.001099	1	-0.266492	19.9304	-1.61945	0.159395	0.762555	-5.37748	1756	1	FALSE
DNLTLWTSDQQDEEAGEGN	P68510	1xTMTpro_zero [N-Term]	0	0.000162	6	-0.266472	22.9471	-1.55213	0.17451	0.78759	-5.46227	1757	1	FALSE
LEGWLSLPVR	P70336	1xTMTpro_zero [N-Term]	0	0.001925	1	-0.266275	23.7588	-1.43655	0.203693	0.829141	-5.60446	1758	1	FALSE
NYEFMWNPHLGYILTCPSNLGTGLR	Q04447	1xCarbamidomethyl [C16]; 1xTMTpro_zero [N-Term]	0	3.511e-05	1	-0.266247	20.4268	-1.23739	0.264766	0.885959	-5.83693	1759	1	FALSE
LYEQILAENEK	Q9DBR7	1xTMTpro_zero [K11]; 1xTMTpro_zero [N-Term]	0	3.511e-05	3	-0.266147	22.8589	-1.74583	0.13437	0.705164	-5.21504	1760	1	FALSE
ITITNDK	Q61696; P63017; P17156	1xTMTpro_zero [K7]; 1xTMTpro_zero [N-Term]	0	0.0005047	1	-0.265995	26.3981	-1.21558	0.272364	0.893001	-5.86125	1761	1	FALSE
EFSPSFINFVNLCLTK	P47809	1xCarbamidomethyl [C13]; 1xTMTpro_zero [K16]; 1xTMTpro_zero [N-Term]	0	3.511e-05	1	-0.26591	21.7022	-1.47668	0.193076	0.81321	-5.55562	1762	1	FALSE
TLAVITK	Q8K1M6	1xTMTpro_zero [K7]; 1xTMTpro_zero [N-Term]	0	0.0007223	0	-0.265488	23.6982	-1.35259	0.227678	0.857014	-5.7046	1763	1	FALSE
AIEIELAK	Q91ZU6	1xTMTpro_zero [K8]; 1xTMTpro_zero [N-Term]	0	0.0001288	2	-0.265364	20.7767	-1.24661	0.26161	0.882809	-5.82658	1764	1	FALSE
CACASHVAK	Q9QXS6	2xCarbamidomethyl [C1; C3]; 1xTMTpro_zero [K9]; 1xTMTpro_zero [N-Term]	0	3.511e-05	0	-0.265009	22.7853	-1.67802	0.147277	0.734954	-5.30267	1765	1	FALSE
LDWGNEQLGLDLVPR	P59764	1xTMTpro_zero [N-Term]	0	0.003205	3	-0.264852	18.9322	-0.571152	0.589818	0.999197	-6.43526	1766	1	FALSE
LETAVNLAWTAGNSNTR	Q60932	1xTMTpro_zero [N-Term]	0	3.511e-05	1	-0.264838	21.4381	-1.0723	0.32713	0.932405	-6.01446	1767	1	FALSE
SIFVTCGDWDLK	Q8C460	1xCarbamidomethyl [C6]; 1xTMTpro_zero [K12]; 1xTMTpro_zero [N-Term]	0	0.0001288	2	-0.264749	20.1145	-1.23821	0.264482	0.885708	-5.83601	1768	1	FALSE
LVVVGGGGVGK	P10833	1xTMTpro_zero [K11]; 1xTMTpro_zero [N-Term]	0	3.511e-05	0	-0.264246	21.5978	-1.25628	0.258336	0.881196	-5.81567	1769	1	FALSE
EFVEEFIWPAVQSSALYEDR	P16460	1xTMTpro_zero [N-Term]	0	0.0002861	5	-0.264224	20.5333	-0.782455	0.465386	0.999197	-6.28278	1770	1	FALSE
LTSEPQPQR	Q91V41	1xTMTpro_zero [N-Term]	0	0.0004175	1	-0.264179	21.8926	-1.84824	0.116967	0.666294	-5.0809	1771	1	FALSE
LLGDVSCR	Q99JG2	1xCarbamidomethyl [C7]; 1xTMTpro_zero [N-Term]	0	0.0001452	1	-0.264146	24.4538	-1.68539	0.145817	0.733114	-5.2932	1772	1	FALSE
ATLPEADGER	Q9JI91	1xTMTpro_zero [N-Term]	0	6.323e-05	3	-0.26405	23.5883	-1.59663	0.164371	0.770853	-5.40637	1773	1	FALSE
DISQDSLQDIK	Q9Z1K5	1xTMTpro_zero [K11]; 1xTMTpro_zero [N-Term]	0	3.511e-05	3	-0.263963	22.1217	-0.90844	0.400642	0.973186	-6.17375	1774	1	FALSE
EIGHGWFGK	Q80YE4	1xTMTpro_zero [K9]; 1xTMTpro_zero [N-Term]	0	0.0001225	1	-0.263404	20.7958	-0.983486	0.365489	0.952601	-6.10309	1775	1	FALSE
LEAEAVPEVSEK	Q9CQM9	1xTMTpro_zero [K12]; 1xTMTpro_zero [N-Term]	0	3.511e-05	4	-0.26337	23.1814	-1.54769	0.175555	0.789998	-5.46782	1776	1	FALSE
YASEDAELLLVGNK	P35283	1xTMTpro_zero [K14]; 1xTMTpro_zero [N-Term]	0	0.0004175	3	-0.263113	19.9805	-0.989113	0.362955	0.949473	-6.09763	1777	1	FALSE
LVVGDGR	P23506	1xTMTpro_zero [N-Term]	0	0.003194	1	-0.262658	23.6086	-1.77253	0.129599	0.694975	-5.18026	1778	1	FALSE
VTVDQAEETTVGQAEEATVGQAGEAILSQAK	D3YVF0	1xTMTpro_zero [K31]; 1xTMTpro_zero [N-Term]	0	3.511e-05	6	-0.262483	22.9806	-1.80245	0.124452	0.684171	-5.14112	1779	1	FALSE
ADGVKPQTNSTK	P28652	2xTMTpro_zero [K5; K12]; 1xTMTpro_zero [N-Term]	0	3.511e-05	1	-0.262374	23.3798	-1.47073	0.194617	0.815106	-5.5629	1780	1	FALSE
EQLYEMFQNILGIK	Q80TJ1	1xTMTpro_zero [K14]; 1xTMTpro_zero [N-Term]	0	3.511e-05	2	-0.262291	22.4163	-1.74673	0.134207	0.705007	-5.21388	1781	1	FALSE
QASATAPGR	O88737	1xTMTpro_zero [N-Term]	0	3.511e-05	0	-0.261843	22.7477	-1.49458	0.188511	0.805545	-5.53366	1782	1	FALSE
DIKPENLLVCEYPDGTK	Q6PGN3	1xCarbamidomethyl [C10]; 2xTMTpro_zero [K3; K17]; 1xTMTpro_zero [N-Term]	0	3.511e-05	4	-0.261678	22.2443	-1.56619	0.171244	0.782403	-5.44467	1783	1	FALSE
DIDSFVPSK	Q8BMF4	1xTMTpro_zero [K9]; 1xTMTpro_zero [N-Term]	0	0.0004027	2	-0.261601	22.3436	-1.4501	0.200048	0.823116	-5.58804	1784	1	FALSE
ESNISSK	Q5DTY9	1xTMTpro_zero [K7]; 1xTMTpro_zero [N-Term]	0	0.0002306	1	-0.261462	21.7323	-1.46778	0.195384	0.816574	-5.5665	1785	1	FALSE
ELQIQVEHYEFQTR	Q9ESN9	1xTMTpro_zero [N-Term]	0	3.511e-05	3	-0.26137	21.5734	-0.682929	0.521584	0.999197	-6.35963	1786	1	FALSE
IEELEGQLDQLTQENR	Q5DU25	1xTMTpro_zero [N-Term]	0	3.511e-05	5	-0.260777	22.7926	-1.23044	0.267167	0.888962	-5.84471	1787	1	FALSE
VVATAPGCGVIECIPDCTSR	E9Q3L2	3xCarbamidomethyl [C8; C13; C17]; 1xTMTpro_zero [N-Term]	0	3.511e-05	2	-0.260594	23.2941	-1.74496	0.134529	0.705433	-5.21618	1788	1	FALSE
NPWGQVEWTGK	O08529	1xTMTpro_zero [K11]; 1xTMTpro_zero [N-Term]	0	3.511e-05	1	-0.260412	21.6536	-1.52605	0.180729	0.793748	-5.49476	1789	1	FALSE
TTCFICGLER	P11881	2xCarbamidomethyl [C3; C6]; 1xTMTpro_zero [N-Term]	0	0.0007223	1	-0.260226	21.8146	-1.7641	0.131087	0.697309	-5.19125	1790	1	FALSE
CIELSCGSVR	Q6PIE5	2xCarbamidomethyl [C1; C6]; 1xTMTpro_zero [N-Term]	0	3.511e-05	1	-0.260155	22.9087	-1.00852	0.354323	0.945891	-6.07864	1791	1	FALSE
GPHGGPSQPTGPR	O88737	1xTMTpro_zero [N-Term]	0	3.511e-05	0	-0.260154	21.6606	-1.66277	0.150343	0.740267	-5.32223	1792	1	FALSE
LDQCQQYVVFER	A2CG49; Q0KL02	1xCarbamidomethyl [C4]; 1xTMTpro_zero [N-Term]	0	6.323e-05	2	-0.259897	20.4406	-1.60727	0.162032	0.767653	-5.39292	1793	1	FALSE
LQANTDLWNEYR	Q8VEH5	1xTMTpro_zero [N-Term]	0	0.0007223	2	-0.259815	20.7268	-1.48897	0.189931	0.806654	-5.54055	1794	1	FALSE
DYSADGQLLHYR	P59281	1xTMTpro_zero [N-Term]	0	0.0001288	2	-0.259747	20.4921	-0.698639	0.512422	0.999197	-6.34807	1795	1	FALSE
QVSVLEDDLSQTR	Q9ERR1	1xTMTpro_zero [N-Term]	0	3.511e-05	3	-0.259723	20.7969	-0.769109	0.472666	0.999197	-6.29358	1796	1	FALSE
SVTPASTLTK	Q9QZQ1	1xTMTpro_zero [K10]; 1xTMTpro_zero [N-Term]	0	0.0004707	0	-0.259558	21.8255	-1.79615	0.125519	0.685522	-5.14937	1797	1	FALSE
VVAEEAWENHLK	Q8R5H1	1xTMTpro_zero [K12]; 1xTMTpro_zero [N-Term]	0	3.511e-05	3	-0.259437	26.498	-1.05437	0.334592	0.934529	-6.03276	1798	1	FALSE
LQGATCSNNK	Q9JHU4	1xCarbamidomethyl [C6]; 1xTMTpro_zero [K10]; 1xTMTpro_zero [N-Term]	0	3.511e-05	0	-0.259367	24.3074	-1.64801	0.153369	0.749068	-5.34111	1799	1	FALSE
KNPTESSGNTGRPK	Q8C419	2xTMTpro_zero [K1; K14]; 1xTMTpro_zero [N-Term]	1	3.511e-05	1	-0.259124	22.9726	-1.73906	0.135607	0.708877	-5.22383	1800	1	FALSE
LTVSWLK	Q810U3	1xTMTpro_zero [K7]; 1xTMTpro_zero [N-Term]	0	0.001729	0	-0.259121	21.1114	-1.63292	0.156525	0.756247	-5.36035	1801	1	FALSE
EELGYDR	Q8VHK5	1xTMTpro_zero [N-Term]	0	0.0007223	3	-0.258978	21.2294	-1.00359	0.356501	0.946655	-6.08349	1802	1	FALSE
SIQFVDWCPTGFK	P68368	1xCarbamidomethyl [C8]; 1xTMTpro_zero [K13]; 1xTMTpro_zero [N-Term]	0	3.511e-05	1	-0.258939	29.4786	-1.59755	0.164169	0.770372	-5.40521	1803	1	FALSE
TFWSPELK	Q6PH08; Q99MI1	1xTMTpro_zero [K8]; 1xTMTpro_zero [N-Term]	0	0.0002306	1	-0.258455	21.407	-1.83717	0.118734	0.671685	-5.0955	1804	1	FALSE
MEIQEIQLK	P21107; P58771	1xTMTpro_zero [K9]; 1xTMTpro_zero [N-Term]	0	0.0001288	2	-0.258266	23.8707	-1.42922	0.205689	0.829995	-5.61332	1805	1	FALSE
DQGNDSASTAPR	Q4KMM3	1xTMTpro_zero [N-Term]	0	0.001925	2	-0.258259	22.2368	-1.42833	0.205932	0.829995	-5.61439	1806	1	FALSE
GPITYSLAGTYICEATNPIGTR	Q9JKF6	1xCarbamidomethyl [C13]; 1xTMTpro_zero [N-Term]	0	3.511e-05	1	-0.258171	22.996	-1.58085	0.167901	0.778513	-5.42626	1807	1	FALSE
AGVWLIDFGK	Q8R071	1xTMTpro_zero [K10]; 1xTMTpro_zero [N-Term]	0	6.323e-05	1	-0.257975	19.6211	-1.36782	0.223143	0.851466	-5.68666	1808	1	FALSE
EADSWEIIEGLK	Q8BXR9	1xTMTpro_zero [K12]; 1xTMTpro_zero [N-Term]	0	0.0005928	4	-0.257749	19.9349	-1.4009	0.213577	0.838665	-5.64733	1809	1	FALSE
YLVVEPAEGDGALCLVCR	Q8VEH5	2xCarbamidomethyl [C14; C17]; 1xTMTpro_zero [N-Term]	0	0.0001288	3	-0.257475	20.4707	-1.42762	0.206127	0.830112	-5.61524	1810	1	FALSE
AFFPCFDTPAVK	Q8VCT3	1xCarbamidomethyl [C5]; 1xTMTpro_zero [K12]; 1xTMTpro_zero [N-Term]	0	0.0009592	1	-0.257453	20.0991	-1.0692	0.328411	0.93271	-6.01764	1811	1	FALSE
FTFGLDWVPK	P56399	1xTMTpro_zero [K10]; 1xTMTpro_zero [N-Term]	0	0.0001288	1	-0.257195	21.7684	-1.58669	0.166587	0.777312	-5.41891	1812	1	FALSE
QAPPPSQTLAAQGPPK	Q9QYX7	1xTMTpro_zero [K16]; 1xTMTpro_zero [N-Term]	0	3.511e-05	0	-0.257052	23.3298	-1.16041	0.29244	0.908071	-5.92164	1813	1	FALSE
ATGEPLPVISWLK	Q7TPD3	1xTMTpro_zero [K13]; 1xTMTpro_zero [N-Term]	0	3.511e-05	1	-0.256769	20.5867	-1.59849	0.163961	0.770372	-5.40402	1814	1	FALSE
SDGFSIETCK	O08529	1xCarbamidomethyl [C9]; 1xTMTpro_zero [K10]; 1xTMTpro_zero [N-Term]	0	6.323e-05	2	-0.256734	21.2227	-1.81385	0.122545	0.679965	-5.12616	1815	1	FALSE
LLEQAWPLSEAQVQASVVK	O08784	1xTMTpro_zero [K19]; 1xTMTpro_zero [N-Term]	0	0.0001225	2	-0.256708	20.2161	-1.78152	0.128031	0.692494	-5.16852	1816	1	FALSE
WTAPEAALYGR	P39688; P05480	1xTMTpro_zero [N-Term]	0	3.511e-05	1	-0.256216	22.9871	-1.17042	0.288704	0.906032	-5.9108	1817	1	FALSE
DTTQEPCGR	Q8C8R3	1xCarbamidomethyl [C7]; 1xTMTpro_zero [N-Term]	0	6.323e-05	2	-0.256206	23.4497	-1.61791	0.159725	0.762696	-5.37943	1818	1	FALSE
TSVSGNWK	O88935	1xTMTpro_zero [K8]; 1xTMTpro_zero [N-Term]	0	3.511e-05	0	-0.255924	25.7129	-1.57174	0.169972	0.780557	-5.43772	1819	1	FALSE
GVQPHVVEMDR	Q9DC07	1xTMTpro_zero [N-Term]	0	0.001099	2	-0.255912	23.6746	-1.66598	0.149693	0.739953	-5.31813	1820	1	FALSE
YADLTEDQLPSCESLKDTIAR	Q9DBJ1	1xCarbamidomethyl [C12]; 1xTMTpro_zero [K16]; 1xTMTpro_zero [N-Term]	1	3.511e-05	5	-0.255766	23.2555	-1.40282	0.213034	0.837915	-5.64504	1821	1	FALSE
SHSIFLINIK	P28738; P33175	1xTMTpro_zero [K10]; 1xTMTpro_zero [N-Term]	0	6.323e-05	0	-0.25564	21.4645	-0.996904	0.359471	0.946655	-6.09004	1822	1	FALSE
TLPQLPNEEK	Q6A065	1xTMTpro_zero [K10]; 1xTMTpro_zero [N-Term]	0	0.001108	2	-0.255569	21.274	-1.78908	0.126727	0.689354	-5.15863	1823	1	FALSE
KVIAAMTVGK	Q9DBG3	2xTMTpro_zero [K1; K10]; 1xTMTpro_zero [N-Term]	1	0.001086	0	-0.255565	21.6935	-0.950478	0.380639	0.962031	-6.13467	1824	1	FALSE
AFVEAQNK	Q9QUR6	1xTMTpro_zero [K8]; 1xTMTpro_zero [N-Term]	0	0.0001452	1	-0.255435	21.083	-1.68101	0.146685	0.73447	-5.29884	1825	1	FALSE
NQTLQK	Q62261	1xTMTpro_zero [K6]; 1xTMTpro_zero [N-Term]	0	0.003194	0	-0.255364	24.9606	-0.892238	0.408565	0.975366	-6.18847	1826	1	FALSE
SVCSEPCEK	Q3UVX5	2xCarbamidomethyl [C3; C7]; 1xTMTpro_zero [K9]; 1xTMTpro_zero [N-Term]	0	0.00273	2	-0.255275	21.1133	-1.56103	0.172436	0.783835	-5.45114	1827	1	FALSE
ECGLGQR	Q8VD37	1xCarbamidomethyl [C2]; 1xTMTpro_zero [N-Term]	0	0.0003679	1	-0.255101	22.5673	-1.40304	0.212972	0.837915	-5.64478	1828	1	FALSE
GLIPECCAVYR	P28028	2xCarbamidomethyl [C6; C7]; 1xTMTpro_zero [N-Term]	0	0.001983	1	-0.2548	21.3422	-1.80347	0.124281	0.684171	-5.13979	1829	1	FALSE
IVEDWQK	Q9JLN9	1xTMTpro_zero [K7]; 1xTMTpro_zero [N-Term]	0	0.002641	2	-0.254785	21.0082	-1.70606	0.141799	0.724627	-5.26656	1830	1	FALSE
GASGSGPTIEEVD	Q61696	1xTMTpro_zero [N-Term]	0	0.001331	3	-0.254679	21.2587	-1.18519	0.283268	0.901544	-5.89472	1831	1	FALSE
VIHECQQR	Q9D4H8	1xCarbamidomethyl [C5]; 1xTMTpro_zero [N-Term]	0	0.000767	1	-0.254288	21.6872	-1.7015	0.142677	0.726635	-5.27246	1832	1	FALSE
SVGEDEK	Q4ACU6	1xTMTpro_zero [K7]; 1xTMTpro_zero [N-Term]	0	0.0002008	3	-0.25428	20.7299	-1.78802	0.126909	0.689592	-5.16002	1833	1	FALSE
VSFELFADK	P17742	1xTMTpro_zero [K9]; 1xTMTpro_zero [N-Term]	0	3.511e-05	2	-0.254246	25.6049	-0.876495	0.416377	0.977732	-6.20257	1834	1	FALSE
GDPQVYEELFSYACPK	Q8QZY1	1xCarbamidomethyl [C14]; 1xTMTpro_zero [K16]; 1xTMTpro_zero [N-Term]	0	3.511e-05	3	-0.25415	22.4339	-1.32513	0.236065	0.864039	-5.7367	1835	1	FALSE
EITVEDSFVHPANEMR	Q80TE7	1xTMTpro_zero [N-Term]	0	3.511e-05	4	-0.254144	22.332	-1.15657	0.293883	0.909513	-5.92578	1836	1	FALSE
QLPVQQDGFHTLPYQR	Q6PFD5	1xTMTpro_zero [N-Term]	0	3.511e-05	1	-0.254007	22.6005	-1.16351	0.29128	0.907313	-5.91829	1837	1	FALSE
ASSIENK	Q0KL02	1xTMTpro_zero [K7]; 1xTMTpro_zero [N-Term]	0	0.0002996	1	-0.253888	21.4865	-1.73822	0.135761	0.709417	-5.22492	1838	1	FALSE
QVDVVITCTGNK	Q80SW1	1xCarbamidomethyl [C8]; 1xTMTpro_zero [K12]; 1xTMTpro_zero [N-Term]	0	3.511e-05	1	-0.25386	23.1825	-1.30387	0.242752	0.867062	-5.76133	1839	1	FALSE
VEELEQELAR	Q8VE47	1xTMTpro_zero [N-Term]	0	0.0002861	4	-0.253626	22.524	-1.32212	0.237002	0.864866	-5.7402	1840	1	FALSE
AVIYNPATQADWTAK	Q61879	1xTMTpro_zero [K15]; 1xTMTpro_zero [N-Term]	0	3.511e-05	1	-0.253445	23.4773	-1.68075	0.146736	0.73447	-5.29917	1841	1	FALSE
DPSPTLASK	Q8C0T5	1xTMTpro_zero [K9]; 1xTMTpro_zero [N-Term]	0	0.001254	1	-0.25308	21.0257	-1.47187	0.194319	0.814595	-5.5615	1842	1	FALSE
DTAVELGK	Q9QYR6	1xTMTpro_zero [K8]; 1xTMTpro_zero [N-Term]	0	3.511e-05	2	-0.253075	27.1843	-0.628188	0.554343	0.999197	-6.39813	1843	1	FALSE
DACEPESGPDPSTVR	O88737	1xCarbamidomethyl [C3]; 1xTMTpro_zero [N-Term]	0	3.511e-05	4	-0.252924	24.5058	-1.54175	0.176962	0.79198	-5.47523	1844	1	FALSE
LEGYWGEAQSLCQAVDEHLR	Q6R891	1xCarbamidomethyl [C12]; 1xTMTpro_zero [N-Term]	0	0.00205	4	-0.252899	22.1439	-0.690485	0.517164	0.999197	-6.3541	1845	1	FALSE
KNSVVEASEAAYK	P68510	2xTMTpro_zero [K1; K13]; 1xTMTpro_zero [N-Term]	1	3.511e-05	2	-0.252891	22.2811	-1.32515	0.236058	0.864039	-5.73668	1846	1	FALSE
TMQTLLSLVK	P00493	1xTMTpro_zero [K10]; 1xTMTpro_zero [N-Term]	0	3.511e-05	0	-0.25278	19.9336	-0.710484	0.505586	0.999197	-6.33922	1847	1	FALSE
DLPVSEQQER	Q9WVJ2	1xTMTpro_zero [N-Term]	0	0.0001288	3	-0.252727	21.7911	-0.77863	0.467464	0.999197	-6.28589	1848	1	FALSE
GPGATQSGPR	O88737	1xTMTpro_zero [N-Term]	0	3.511e-05	0	-0.252617	24.1466	-1.62013	0.159248	0.762555	-5.37661	1849	1	FALSE
DLWPMVSPEDTQSLSFSEESPSK	Q9QYR6	1xOxidation [M5]; 1xTMTpro_zero [K23]; 1xTMTpro_zero [N-Term]	0	0.0001288	5	-0.252375	21.0551	-0.678048	0.524453	0.999197	-6.36317	1850	1	FALSE
AIEEFESSLK	Q91ZU6	1xTMTpro_zero [K10]; 1xTMTpro_zero [N-Term]	0	3.511e-05	3	-0.252127	21.2631	-1.34861	0.228874	0.857014	-5.70927	1851	1	FALSE
EATDPRPYEAENAIESWR	P47754	1xTMTpro_zero [N-Term]	0	0.00273	5	-0.251854	23.3764	-1.78885	0.126766	0.689354	-5.15893	1852	1	FALSE
QGLQTTQAHLER	Q6PAR5	1xTMTpro_zero [N-Term]	0	3.511e-05	1	-0.251493	20.0908	-1.4095	0.211153	0.836014	-5.63704	1853	1	FALSE
YSLIPEEEEEKEEAK	Q9ESX4	2xTMTpro_zero [K11; K15]; 1xTMTpro_zero [N-Term]	1	3.511e-05	7	-0.251348	21.7153	-1.5695	0.170484	0.780564	-5.44052	1854	1	FALSE
TSDLTSTPSQPNFNTCTQCHNK	O88737	2xCarbamidomethyl [C16; C19]; 1xTMTpro_zero [K22]; 1xTMTpro_zero [N-Term]	0	3.511e-05	1	-0.251325	22.7457	-1.52414	0.181193	0.794539	-5.49713	1855	1	FALSE
GQTNNAASASASNST	Q9WV60	1xTMTpro_zero [N-Term]	0	0.0001225	0	-0.251082	20.0241	-1.49227	0.189093	0.805805	-5.53649	1856	1	FALSE
VCNPIISK	P17156	1xCarbamidomethyl [C2]; 1xTMTpro_zero [K8]; 1xTMTpro_zero [N-Term]	0	0.0002306	0	-0.250958	20.6003	-1.19411	0.280031	0.899684	-5.88495	1857	1	FALSE
NIFIECTGTDFTK	Q9WUA2	1xCarbamidomethyl [C6]; 1xTMTpro_zero [K13]; 1xTMTpro_zero [N-Term]	0	0.0007754	2	-0.250709	20.3021	-1.46952	0.194932	0.815931	-5.56438	1858	1	FALSE
ITTVPLPTAPNVPIIDYEVSISGEWSPWQAK	Q9JHU4	1xTMTpro_zero [K31]; 1xTMTpro_zero [N-Term]	0	0.0001288	3	-0.250644	21.7738	-1.51077	0.184467	0.799861	-5.51368	1859	1	FALSE
VAQSLCGEDLIIK	Q921F2	1xCarbamidomethyl [C6]; 1xTMTpro_zero [K13]; 1xTMTpro_zero [N-Term]	0	3.511e-05	2	-0.250552	21.3657	-1.67505	0.14787	0.736215	-5.30649	1860	1	FALSE
DDSNWWQGR	P70290	1xTMTpro_zero [N-Term]	0	0.001729	2	-0.250355	20.76	-1.56421	0.1717	0.782403	-5.44715	1861	1	FALSE
GTQCEK	Q9R0Y5; Q920P5	1xCarbamidomethyl [C4]; 1xTMTpro_zero [K6]; 1xTMTpro_zero [N-Term]	0	0.00233	1	-0.250238	23.0279	-1.54721	0.175669	0.790253	-5.46842	1862	1	FALSE
ATPTTAPGTSPR	Q8VHH5	1xTMTpro_zero [N-Term]	0	0.0007542	0	-0.249694	20.7417	-1.38858	0.217094	0.84315	-5.66203	1863	1	FALSE
DLKPQNLLISDTGELK	O35495	2xTMTpro_zero [K3; K16]; 1xTMTpro_zero [N-Term]	0	0.0007223	3	-0.249674	22.0048	-1.35707	0.226335	0.855082	-5.69934	1864	1	FALSE
EVMLALTVLETCVK	Q5SRX1	1xCarbamidomethyl [C12]; 1xTMTpro_zero [K14]; 1xTMTpro_zero [N-Term]	0	3.511e-05	2	-0.249221	21.0686	-1.43049	0.205343	0.829995	-5.61179	1865	1	FALSE
KPAAGLSAAPVPPAAAPLLDFSSDSVPPAPR	Q99P72	1xTMTpro_zero [K1]; 1xTMTpro_zero [N-Term]	0	3.511e-05	2	-0.249135	25.6818	-0.810839	0.450172	0.993009	-6.25932	1866	1	FALSE
GLQTSQDAR	P14211	1xTMTpro_zero [N-Term]	0	0.0008703	1	-0.248973	22.8057	-1.3843	0.218327	0.844462	-5.66712	1867	1	FALSE
NITYLPAGQSVLLQLPQ	P67778	1xTMTpro_zero [N-Term]	0	3.511e-05	0	-0.248927	20.059	-0.849769	0.429897	0.984896	-6.22608	1868	1	FALSE
DAEQTEPEQREPTPYPDER	Q9QYR6	1xTMTpro_zero [N-Term]	1	3.511e-05	7	-0.248808	23.9784	-1.45255	0.199397	0.822003	-5.58507	1869	1	FALSE
QSFFSDPAVPVK	Q9WV18	1xTMTpro_zero [K12]; 1xTMTpro_zero [N-Term]	0	3.511e-05	1	-0.248602	20.2861	-0.990587	0.362294	0.949473	-6.0962	1870	1	FALSE
FMDEFFEQVEEIR	O35526	1xTMTpro_zero [N-Term]	0	3.511e-05	5	-0.248468	23.2796	-1.5089	0.18493	0.799861	-5.51599	1871	1	FALSE
AAEEAER	Q99LI8	1xTMTpro_zero [N-Term]	0	0.001266	3	-0.248416	22.8721	-1.42692	0.206319	0.830112	-5.61609	1872	1	FALSE
LVQDVANNTNEEAGDGTTTATVLAR	P63038	1xTMTpro_zero [N-Term]	0	3.511e-05	4	-0.248377	22.9625	-1.32581	0.235854	0.86375	-5.73591	1873	1	FALSE
NTVPCQK	Q01097	1xCarbamidomethyl [C5]; 1xTMTpro_zero [K7]; 1xTMTpro_zero [N-Term]	0	0.00107	0	-0.248289	21.163	-1.55421	0.174025	0.787245	-5.45968	1874	1	FALSE
NICFTVWDVGGQDK	P61750; P84084	1xCarbamidomethyl [C3]; 1xTMTpro_zero [K14]; 1xTMTpro_zero [N-Term]	0	3.511e-05	2	-0.248277	22.5594	-1.44567	0.201232	0.824921	-5.59341	1875	1	FALSE
NTTIPTK	P63017; P38647; P17156	1xTMTpro_zero [K7]; 1xTMTpro_zero [N-Term]	0	0.0002996	0	-0.248165	26.227	-1.61796	0.159715	0.762696	-5.37937	1876	1	FALSE
TECNQCK	Q61545	2xCarbamidomethyl [C3; C6]; 1xTMTpro_zero [K7]; 1xTMTpro_zero [N-Term]	0	0.001108	1	-0.247996	21.1544	-1.15888	0.293012	0.908233	-5.92328	1877	1	FALSE
YATWSIIMDSVVPSDK	P16092	2xPhospho [Y1; T3]; 1xTMTpro_zero [K16]; 1xTMTpro_zero [N-Term]	0	0.001756	2	-0.247822	24.2226	-1.31022	0.240737	0.867062	-5.754	1878	1	TRUE
LEWSPVHK	Q8BVE3	1xTMTpro_zero [K8]; 1xTMTpro_zero [N-Term]	0	0.0007754	1	-0.247648	22.561	-1.11062	0.311635	0.923384	-5.97466	1879	1	FALSE
HSDLVTK	Q5SWU9	1xTMTpro_zero [K7]; 1xTMTpro_zero [N-Term]	0	0.0001793	1	-0.247392	21.2579	-1.60181	0.163229	0.770372	-5.39983	1880	1	FALSE
GVEVTVGHEQEEGGK	Q9D172	1xTMTpro_zero [K15]; 1xTMTpro_zero [N-Term]	0	3.511e-05	4	-0.247343	21.649	-1.5707	0.170209	0.780564	-5.43902	1881	1	FALSE
ELIAEAK	Q5SXY1; O54988	1xTMTpro_zero [K7]; 1xTMTpro_zero [N-Term]	0	0.0007223	2	-0.247176	20.8525	-0.512161	0.627883	0.999197	-6.47034	1882	1	FALSE
FQFPAQVTDVSENAK	Q3UU96	1xTMTpro_zero [K15]; 1xTMTpro_zero [N-Term]	0	3.511e-05	2	-0.247159	21.2476	-0.978519	0.367738	0.952608	-6.10789	1883	1	FALSE
ESSTPEEFSR	P49025	1xTMTpro_zero [N-Term]	0	0.001373	3	-0.246991	20.8656	-1.68483	0.145929	0.733114	-5.29393	1884	1	FALSE
QGFLPLNTPVEK	Q80U40	1xTMTpro_zero [K12]; 1xTMTpro_zero [N-Term]	0	3.511e-05	1	-0.246839	20.9806	-1.14697	0.29752	0.91321	-5.9361	1885	1	FALSE
GDPPQLSNSEER	P47809	1xTMTpro_zero [N-Term]	0	3.511e-05	3	-0.246777	22.1368	-1.74573	0.134388	0.705164	-5.21517	1886	1	FALSE
ISNYGWDQSDK	Q9CXW3	1xTMTpro_zero [K11]; 1xTMTpro_zero [N-Term]	0	0.001056	2	-0.24665	20.0945	-1.42525	0.206779	0.831001	-5.61811	1887	1	FALSE
AEPQELLQLDGYTVDYTDPQPGLEGGR	Q80TJ1	1xTMTpro_zero [N-Term]	0	3.511e-05	6	-0.246386	21.3528	-1.32366	0.236523	0.864554	-5.73842	1888	1	FALSE
LGEWVGLCK	P63323	1xCarbamidomethyl [C8]; 1xTMTpro_zero [K9]; 1xTMTpro_zero [N-Term]	0	6.323e-05	1	-0.246345	20.4063	-1.27591	0.251802	0.875545	-5.79338	1889	1	FALSE
RLSTSSLSSTGSSSLLEDSEDDLLSDSESR	Q8R071	1xTMTpro_zero [N-Term]	1	3.511e-05	7	-0.246248	21.1945	-1.3723	0.221824	0.850651	-5.68135	1890	1	FALSE
LLDAEDVDVPSPDEK	Q9QXZ0	1xTMTpro_zero [K15]; 1xTMTpro_zero [N-Term]	0	3.511e-05	6	-0.245526	21.6593	-1.50246	0.186533	0.802144	-5.52395	1891	1	FALSE
YGGTFQNVSVK	P17427	1xTMTpro_zero [K11]; 1xTMTpro_zero [N-Term]	0	0.0001288	0	-0.245306	23.1525	-0.369676	0.725048	0.999197	-6.54045	1892	1	FALSE
AEEASK	Q9WTQ5	1xTMTpro_zero [K6]; 1xTMTpro_zero [N-Term]	0	0.00233	2	-0.245107	26.0983	-1.50876	0.184964	0.799861	-5.51616	1893	1	FALSE
NNPEPWNK	Q62425	1xTMTpro_zero [K8]; 1xTMTpro_zero [N-Term]	0	0.0001288	1	-0.245104	23.302	-1.17912	0.285493	0.903965	-5.90135	1894	1	FALSE
VLNSCSNR	P35436	1xCarbamidomethyl [C5]; 1xTMTpro_zero [N-Term]	0	0.002165	0	-0.244932	20.8114	-1.30477	0.242464	0.867062	-5.76029	1895	1	FALSE
ELEEEWVIVSDEEIQEAK	Q8C8R3	1xTMTpro_zero [K18]; 1xTMTpro_zero [N-Term]	0	3.511e-05	8	-0.244855	21.6555	-1.36101	0.225159	0.854622	-5.69469	1896	1	FALSE
LQAVLPPAVWNAEQQR	Q8VD37	1xTMTpro_zero [N-Term]	0	0.0001288	1	-0.244664	24.3634	-1.4425	0.202085	0.826872	-5.59726	1897	1	FALSE
EYFGQFGEIEAIELPIDPK	Q99020	1xTMTpro_zero [K19]; 1xTMTpro_zero [N-Term]	0	3.511e-05	5	-0.244457	21.268	-1.30095	0.243682	0.867222	-5.76469	1898	1	FALSE
EEFPTLQAAGDQDK	Q7TSC1	1xTMTpro_zero [K14]; 1xTMTpro_zero [N-Term]	0	3.511e-05	4	-0.243976	21.1289	-1.58905	0.166059	0.775663	-5.41594	1899	1	FALSE
VEDEKSEMEETLTAIAEELAASAK	P08553	2xTMTpro_zero [K5; K24]; 1xTMTpro_zero [N-Term]	1	3.511e-05	8	-0.243976	20.9179	-0.786604	0.463139	0.999197	-6.27939	1900	1	FALSE
GYLSPDLSK	P28028; P04627	1xTMTpro_zero [K9]; 1xTMTpro_zero [N-Term]	0	0.0003189	1	-0.243789	21.6186	-1.33544	0.232882	0.860175	-5.72469	1901	1	FALSE
GSDGAASSYQLK	O08788	1xTMTpro_zero [K12]; 1xTMTpro_zero [N-Term]	0	3.511e-05	1	-0.243569	21.4216	-1.17883	0.285598	0.903965	-5.90166	1902	1	FALSE
QWIVFDGDVDPEWVENLNSVLDDNK	Q9JHU4	1xTMTpro_zero [K25]; 1xTMTpro_zero [N-Term]	0	3.511e-05	7	-0.243426	21.4467	-1.46854	0.195187	0.816304	-5.56558	1903	1	FALSE
LFSQGQDVSDK	Q9QZQ1	1xTMTpro_zero [K11]; 1xTMTpro_zero [N-Term]	0	0.0002861	2	-0.243193	21.1181	-1.4254	0.206736	0.831001	-5.61792	1904	1	FALSE
FSYIPEAK	P35436	1xTMTpro_zero [K8]; 1xTMTpro_zero [N-Term]	0	0.0001452	1	-0.242721	21.5338	-1.00151	0.357425	0.946655	-6.08553	1905	1	FALSE
APQAAGK	Q9CZ30	1xTMTpro_zero [K7]; 1xTMTpro_zero [N-Term]	0	0.001031	0	-0.242637	22.2624	-1.21605	0.272198	0.893001	-5.86073	1906	1	FALSE
LFCVGFTK	P97351	1xCarbamidomethyl [C3]; 1xTMTpro_zero [K8]; 1xTMTpro_zero [N-Term]	0	0.0004363	0	-0.242568	20.4785	-1.40151	0.213403	0.838665	-5.6466	1907	1	FALSE
LENIIVTDVDPK	Q8BX70	1xTMTpro_zero [K12]; 1xTMTpro_zero [N-Term]	0	3.511e-05	3	-0.241933	21.0674	-1.49709	0.187878	0.804076	-5.53056	1908	1	FALSE
VSSSSSESEPELTQLSK	Q8C8R3	1xTMTpro_zero [K17]; 1xTMTpro_zero [N-Term]	0	3.511e-05	3	-0.241911	22.5911	-1.44235	0.202124	0.826872	-5.59744	1909	1	FALSE
ETWLSENQR	Q62261	1xTMTpro_zero [N-Term]	0	3.511e-05	2	-0.241864	26.8864	-1.44866	0.200431	0.824068	-5.58978	1910	1	FALSE
LLLWSQR	Q9QXS1	1xTMTpro_zero [N-Term]	0	0.0007754	0	-0.241536	23.5955	-1.60028	0.163565	0.770372	-5.40176	1911	1	FALSE
NVLAESAR	Q9D172	1xTMTpro_zero [N-Term]	0	0.0007223	1	-0.241415	23.4015	-1.19309	0.280399	0.899826	-5.88607	1912	1	FALSE
EQSTGQATK	Q9Z140	1xTMTpro_zero [K9]; 1xTMTpro_zero [N-Term]	0	3.511e-05	1	-0.241409	20.8521	-1.3157	0.239011	0.867061	-5.74766	1913	1	FALSE
NILVSEDLVAK	P41242	1xTMTpro_zero [K11]; 1xTMTpro_zero [N-Term]	0	6.323e-05	2	-0.241391	19.6207	-1.01694	0.350632	0.94362	-6.07032	1914	1	FALSE
DWGSSSGSQGR	Q62108	1xTMTpro_zero [N-Term]	0	3.511e-05	1	-0.24139	23.1853	-1.585	0.166965	0.778078	-5.42104	1915	1	FALSE
GCFHCEVCK	Q9DC07	3xCarbamidomethyl [C2; C5; C8]; 1xTMTpro_zero [K9]; 1xTMTpro_zero [N-Term]	0	0.0008249	1	-0.241372	22.7557	-1.10987	0.311933	0.923384	-5.97545	1916	1	FALSE
KEPEIITVTLK	Q9QZQ1	2xTMTpro_zero [K1; K11]; 1xTMTpro_zero [N-Term]	1	0.001993	2	-0.241337	20.6589	-1.29206	0.24654	0.870129	-5.77492	1917	1	FALSE
FNVSATPEQYVPYSTTR	Q7TMF3	1xTMTpro_zero [N-Term]	0	3.511e-05	1	-0.241143	21.3707	-1.50224	0.186586	0.802144	-5.52421	1918	1	FALSE
IVADQLCAK	Q9CX00	1xCarbamidomethyl [C7]; 1xTMTpro_zero [K9]; 1xTMTpro_zero [N-Term]	0	3.511e-05	1	-0.24103	21.5204	-0.801996	0.454873	0.994371	-6.2667	1919	1	FALSE
VILLGDGGVGK	Q8BHH2	1xTMTpro_zero [K11]; 1xTMTpro_zero [N-Term]	0	0.0001452	1	-0.240979	19.4686	-1.40073	0.213624	0.838665	-5.64753	1920	1	FALSE
FAEQTLR	Q9QXS1	1xTMTpro_zero [N-Term]	0	0.001031	1	-0.240901	24.1987	-1.64281	0.154449	0.750389	-5.34775	1921	1	FALSE
YGLLAAILGDK	Q99LC3	1xTMTpro_zero [K11]; 1xTMTpro_zero [N-Term]	0	3.511e-05	1	-0.240606	20.2543	-1.63928	0.155187	0.752787	-5.35225	1922	1	FALSE
LVPLLDTGDIIIDGGNSEYR	Q9DCD0	1xTMTpro_zero [N-Term]	0	3.511e-05	4	-0.240527	21.4557	-0.860471	0.424444	0.981631	-6.21674	1923	1	FALSE
LVVVELNNR	Q69ZR2	1xTMTpro_zero [N-Term]	0	0.002412	1	-0.240363	20.194	-1.51177	0.18422	0.799861	-5.51244	1924	1	FALSE
DWNPSTAR	Q8CGF6	1xTMTpro_zero [N-Term]	0	0.002743	1	-0.240273	23.0992	-0.951992	0.379933	0.961589	-6.13324	1925	1	FALSE
SPVPSQQASPK	Q9QYX7	1xTMTpro_zero [K11]; 1xTMTpro_zero [N-Term]	0	0.0002996	0	-0.240222	24.2583	-1.12864	0.304569	0.919503	-5.95564	1926	1	FALSE
NVTQQINER	Q3UTH8	1xTMTpro_zero [N-Term]	0	3.511e-05	1	-0.240129	20.7586	-1.32985	0.234604	0.861904	-5.73121	1927	1	FALSE
TLAVASAK	Q6PGN3	1xTMTpro_zero [K8]; 1xTMTpro_zero [N-Term]	0	0.0001288	0	-0.240122	20.2777	-1.34737	0.229249	0.857141	-5.71072	1928	1	FALSE
HLEINPDHSIIETLR	P07901	1xTMTpro_zero [N-Term]	0	3.511e-05	3	-0.239893	24.3784	-1.06745	0.329135	0.93271	-6.01944	1929	1	FALSE
AQAPELQQEEERPGAVGSPR	Q3TES0	1xTMTpro_zero [N-Term]	0	0.0006959	4	-0.239756	21.1454	-0.870967	0.419147	0.978232	-6.20748	1930	1	FALSE
VSENEEEKPSDAPK	Q8CJ19	2xTMTpro_zero [K8; K14]; 1xTMTpro_zero [N-Term]	0	0.001498	5	-0.239756	21.1454	-0.870967	0.419147	0.978232	-6.20748	1931	1	FALSE
LNIDQDALFFLK	Q80XK6	1xTMTpro_zero [K12]; 1xTMTpro_zero [N-Term]	0	3.511e-05	2	-0.239556	20.0426	-0.641391	0.546325	0.999197	-6.38909	1932	1	FALSE
QHTVTTTTK	P04925	1xTMTpro_zero [K9]; 1xTMTpro_zero [N-Term]	0	0.0004175	0	-0.239151	20.8011	-1.54255	0.176771	0.79198	-5.47423	1933	1	FALSE
GEVPCTVTTASPLDDAVLSELK	Q9DB20	1xCarbamidomethyl [C5]; 1xTMTpro_zero [K22]; 1xTMTpro_zero [N-Term]	0	3.511e-05	4	-0.238641	23.8518	-1.46198	0.196902	0.819248	-5.57358	1934	1	FALSE
QELEDLTADIK	P61264	1xTMTpro_zero [K11]; 1xTMTpro_zero [N-Term]	0	0.0001288	4	-0.238383	21.2123	-1.36371	0.224358	0.852748	-5.69151	1935	1	FALSE
VLTTTALSTVSSGAQR	Q8BRT1	1xTMTpro_zero [N-Term]	0	3.511e-05	0	-0.238304	25.1691	-1.68104	0.146678	0.73447	-5.2988	1936	1	FALSE
NNPPTIVQDK	Q5SRX1	1xTMTpro_zero [K10]; 1xTMTpro_zero [N-Term]	0	3.511e-05	1	-0.238274	22.8648	-1.33602	0.232706	0.860175	-5.72401	1937	1	FALSE
RSQEVTDFLAPLQTSSR	Q9QYX7	1xTMTpro_zero [N-Term]	1	3.511e-05	2	-0.238076	22.4736	-1.08588	0.321565	0.928246	-6.00046	1938	1	FALSE
VLDEFSK	Q9CQW1	1xTMTpro_zero [K7]; 1xTMTpro_zero [N-Term]	0	0.002129	2	-0.23774	21.9789	-1.63443	0.156206	0.754969	-5.35843	1939	1	FALSE
EKDTAVQGNIR	Q8BFY6	1xTMTpro_zero [K2]; 1xTMTpro_zero [N-Term]	1	6.323e-05	2	-0.237479	23.3663	-1.29416	0.245861	0.869418	-5.77251	1940	1	FALSE
EQQAWVISPPQPSPQK	Q8C1B1	1xTMTpro_zero [K16]; 1xTMTpro_zero [N-Term]	0	3.511e-05	1	-0.237408	20.9316	-0.426014	0.685807	0.999197	-6.51526	1941	1	FALSE
GTEITHAVVIK	Q8R1B4	1xTMTpro_zero [K11]; 1xTMTpro_zero [N-Term]	0	3.511e-05	1	-0.237399	21.9251	-1.12443	0.306208	0.920993	-5.9601	1942	1	FALSE
LHLLPGASK	P47708	1xTMTpro_zero [K9]; 1xTMTpro_zero [N-Term]	0	0.0005047	0	-0.236952	23.6959	-1.21343	0.273122	0.893283	-5.86363	1943	1	FALSE
NIDCYGTDFCVR	Q8CHK3	2xCarbamidomethyl [C4; C10]; 1xTMTpro_zero [N-Term]	0	3.511e-05	2	-0.236878	20.7741	-1.41365	0.209991	0.835351	-5.63205	1944	1	FALSE
AALSLPANVEDVCPNIPSLEK	E9Q401	1xCarbamidomethyl [C13]; 1xTMTpro_zero [K21]; 1xTMTpro_zero [N-Term]	0	3.511e-05	3	-0.236682	21.697	-1.62254	0.158732	0.761541	-5.37356	1945	1	FALSE
RPVNVPFDIFTEEVK	Q61423	1xTMTpro_zero [K15]; 1xTMTpro_zero [N-Term]	0	0.0002209	3	-0.236628	21.3151	-1.35648	0.22651	0.855082	-5.70002	1946	1	FALSE
VHYGCVIFVR	Q8BLE7; Q3TXX4	1xCarbamidomethyl [C5]; 1xTMTpro_zero [N-Term]	0	3.511e-05	0	-0.236525	24.8835	-0.942083	0.384569	0.963532	-6.14257	1947	1	FALSE
IKGPNAVQLVK	Q7TMY8	2xTMTpro_zero [K2; K11]; 1xTMTpro_zero [N-Term]	1	0.0005402	0	-0.23636	21.6805	-1.34046	0.231347	0.857835	-5.71882	1948	1	FALSE
LHPEDFPEK	Q9CQ54	1xTMTpro_zero [K9]; 1xTMTpro_zero [N-Term]	0	0.0001793	3	-0.236172	22.8933	-1.49414	0.18862	0.805765	-5.53419	1949	1	FALSE
VYFIYEGYQGLVDGGSNIVEAK	Q9WUA3	1xTMTpro_zero [K22]; 1xTMTpro_zero [N-Term]	0	3.511e-05	3	-0.235917	24.3167	-1.58432	0.167118	0.778078	-5.42189	1950	1	FALSE
LDLVGSSQPIK	B1AY13	1xTMTpro_zero [K11]; 1xTMTpro_zero [N-Term]	0	0.0002209	1	-0.235755	20.4656	-1.2496	0.260595	0.882247	-5.82321	1951	1	FALSE
IAYVYPDQR	Q8VHL1	1xTMTpro_zero [N-Term]	0	0.0009427	1	-0.235397	22.3885	-0.512818	0.627452	0.999197	-6.46997	1952	1	FALSE
TEWLCLNCQTK	O88737	2xCarbamidomethyl [C5; C8]; 1xTMTpro_zero [K11]; 1xTMTpro_zero [N-Term]	0	3.511e-05	1	-0.235175	23.2486	-1.14076	0.299892	0.913988	-5.94274	1953	1	FALSE
SEPQNLGGAAGR	P61021	1xTMTpro_zero [N-Term]	0	6.323e-05	1	-0.234911	22.0486	-1.26005	0.257072	0.880118	-5.81141	1954	1	FALSE
NNLLTNK	Q9R111	1xTMTpro_zero [K7]; 1xTMTpro_zero [N-Term]	0	0.0004027	0	-0.234595	22.8506	-1.12988	0.304088	0.919206	-5.95432	1955	1	FALSE
YGQGGNCAEGK	Q3TMH2	1xCarbamidomethyl [C7]; 1xTMTpro_zero [K11]; 1xTMTpro_zero [N-Term]	0	0.0001288	1	-0.234483	20.2001	-1.45417	0.198966	0.821054	-5.58309	1956	1	FALSE
ELAQDAK	P11881	1xTMTpro_zero [K7]; 1xTMTpro_zero [N-Term]	0	0.0002861	2	-0.234224	23.4371	-1.02018	0.349219	0.94362	-6.0671	1957	1	FALSE
DASGWFDVLQK	P42859	1xTMTpro_zero [K11]; 1xTMTpro_zero [N-Term]	0	3.511e-05	2	-0.234024	20.3177	-1.53228	0.179224	0.793096	-5.48702	1958	1	FALSE
FDELYHLK	B1AZP2	1xTMTpro_zero [K8]; 1xTMTpro_zero [N-Term]	0	0.002178	2	-0.233832	23.1744	-1.53898	0.177619	0.79198	-5.47868	1959	1	FALSE
QVIGTGSFFPK	P97447	1xTMTpro_zero [K11]; 1xTMTpro_zero [N-Term]	0	3.511e-05	0	-0.233573	21.637	-1.41541	0.209501	0.835351	-5.62994	1960	1	FALSE
ELAGQPVHLK	O35350	1xTMTpro_zero [K10]; 1xTMTpro_zero [N-Term]	0	0.00102	1	-0.23357	21.5225	-1.18936	0.281751	0.900019	-5.89016	1961	1	FALSE
ISFTGSTATGK	Q8BWF0	1xTMTpro_zero [K11]; 1xTMTpro_zero [N-Term]	0	3.511e-05	0	-0.232823	21.4516	-1.35567	0.226752	0.855163	-5.70097	1962	1	FALSE
NADTAK	Q9JKY5	1xTMTpro_zero [K6]; 1xTMTpro_zero [N-Term]	0	0.002765	1	-0.232818	21.1635	-0.651932	0.539976	0.999197	-6.38177	1963	1	FALSE
LSPEPWTPETGLVTDAFK	Q9QUJ7	1xTMTpro_zero [K18]; 1xTMTpro_zero [N-Term]	0	0.000162	3	-0.232753	20.2858	-1.30139	0.243543	0.867222	-5.76419	1964	1	FALSE
IDLPAENSNSETIIITGK	Q8VDJ3	1xTMTpro_zero [K18]; 1xTMTpro_zero [N-Term]	0	3.511e-05	3	-0.232304	20.7618	-0.800765	0.45553	0.994371	-6.26773	1965	1	FALSE
GMTPAEAEMHFLENAK	Q9WV92	1xTMTpro_zero [K16]; 1xTMTpro_zero [N-Term]	0	0.0007223	3	-0.231877	24.0724	-1.00621	0.355343	0.946655	-6.08091	1966	1	FALSE
IGPNIQLAECYGLR	Q9QVP9	1xCarbamidomethyl [C10]; 1xTMTpro_zero [N-Term]	0	3.511e-05	1	-0.231639	22.8364	-1.03449	0.343035	0.940253	-6.05283	1967	1	FALSE
SEVEIPATVTAFVFEEDGVPVPALR	Q9QYB8	1xTMTpro_zero [N-Term]	0	3.511e-05	5	-0.231636	23.2159	-1.27739	0.251316	0.874753	-5.7917	1968	1	FALSE
EANLQALIATGGDINAAIER	Q9QZM0	1xTMTpro_zero [N-Term]	0	3.511e-05	3	-0.231566	21.3432	-0.649685	0.541326	0.999197	-6.38334	1969	1	FALSE
EAPCILIYIPDGHTK	Q8CGC7	1xCarbamidomethyl [C4]; 1xTMTpro_zero [K15]; 1xTMTpro_zero [N-Term]	0	3.511e-05	2	-0.231293	21.101	-1.55358	0.174172	0.787261	-5.46047	1970	1	FALSE
QEQYYSEK	Q9Z1B3	1xTMTpro_zero [K8]; 1xTMTpro_zero [N-Term]	0	3.511e-05	2	-0.231228	22.3387	-0.936268	0.387311	0.966117	-6.14802	1971	1	FALSE
ETVAAPGR	Q7TSJ2	1xTMTpro_zero [N-Term]	0	0.0001793	1	-0.231127	25.4329	-1.35834	0.225956	0.855082	-5.69784	1972	1	FALSE
AEILALQQALK	P49025	1xTMTpro_zero [K11]; 1xTMTpro_zero [N-Term]	0	3.511e-05	1	-0.230922	20.9869	-1.14286	0.299086	0.913927	-5.94049	1973	1	FALSE
ACGNFGIPCELR	Q9DCL9	2xCarbamidomethyl [C2; C9]; 1xTMTpro_zero [N-Term]	0	0.001947	1	-0.230876	20.6126	-1.29295	0.246251	0.869841	-5.77389	1974	1	FALSE
QAQDLAR	Q61411	1xTMTpro_zero [N-Term]	0	0.0005047	1	-0.230682	21.7088	-1.21087	0.274031	0.893618	-5.86648	1975	1	FALSE
GVLTGPEYEALDALPDAER	Q9D1X0	1xTMTpro_zero [N-Term]	0	3.511e-05	5	-0.230672	22.841	-1.13793	0.300979	0.914978	-5.94576	1976	1	FALSE
FNAIALSAA	Q9JKB1	1xTMTpro_zero [N-Term]	0	0.00136	0	-0.230667	20.6196	-1.34818	0.229004	0.857014	-5.70978	1977	1	FALSE
VTTGAPIPCGADAVVQVEDTELIR	Q8BUV3	1xCarbamidomethyl [C9]; 1xTMTpro_zero [N-Term]	0	3.511e-05	4	-0.229473	21.543	-1.6059	0.162331	0.768284	-5.39465	1978	1	FALSE
LDIIQPLPETCEEISSDALTVR	Q5KU39	1xCarbamidomethyl [C11]; 1xTMTpro_zero [N-Term]	0	3.511e-05	5	-0.22928	19.5888	-0.581667	0.583177	0.999197	-6.42865	1979	1	FALSE
WLSPTQLSALCK	Q9JI90	1xCarbamidomethyl [C11]; 1xTMTpro_zero [K12]; 1xTMTpro_zero [N-Term]	0	3.511e-05	0	-0.229087	21.1859	-1.49269	0.188987	0.805805	-5.53597	1980	1	FALSE
AEQASSSKPPAAK	O88737	2xTMTpro_zero [K8; K13]; 1xTMTpro_zero [N-Term]	0	3.511e-05	1	-0.229051	24.8096	-1.28416	0.249103	0.873367	-5.78397	1981	1	FALSE
LSEEVEQK	Q6NS60	1xTMTpro_zero [K8]; 1xTMTpro_zero [N-Term]	0	0.0007754	3	-0.228398	21.8832	-0.997575	0.359172	0.946655	-6.08938	1982	1	FALSE
VAAPAVLNDISK	Q3TLH4	1xTMTpro_zero [K12]; 1xTMTpro_zero [N-Term]	0	3.511e-05	1	-0.228382	20.6673	-0.808503	0.45141	0.993323	-6.26128	1983	1	FALSE
EPLGSQR	O88737	1xTMTpro_zero [N-Term]	0	0.0008863	1	-0.228228	25.8019	-1.37116	0.222158	0.851226	-5.6827	1984	1	FALSE
DEQNEEK	Q61879	1xTMTpro_zero [K7]; 1xTMTpro_zero [N-Term]	0	0.0002306	4	-0.228183	21.742	-1.24517	0.262103	0.88283	-5.8282	1985	1	FALSE
QAGAPQATR	O88935	1xTMTpro_zero [N-Term]	0	0.0001452	0	-0.228104	24.5195	-1.40644	0.212012	0.836319	-5.6407	1986	1	FALSE
LVAIVDPHIK	Q8BHN3	1xTMTpro_zero [K10]; 1xTMTpro_zero [N-Term]	0	0.0001452	1	-0.227783	20.2492	-0.881456	0.413903	0.977531	-6.19815	1987	1	FALSE
ISAQVVDYYK	Q6PB44	1xTMTpro_zero [K10]; 1xTMTpro_zero [N-Term]	0	6.323e-05	1	-0.227702	20.9999	-1.47949	0.192353	0.81321	-5.55218	1988	1	FALSE
SVQNHNNK	Q68FD5	1xTMTpro_zero [K8]; 1xTMTpro_zero [N-Term]	0	0.0001793	0	-0.227697	22.2851	-1.17175	0.288211	0.905498	-5.90936	1989	1	FALSE
EQTVQDDLQWYQALVR	Q8C419	1xTMTpro_zero [N-Term]	0	3.511e-05	3	-0.22735	23.3331	-1.36422	0.224207	0.852734	-5.69091	1990	1	FALSE
LSHAVGCAFAACLER	O08919; Q9QZS3	2xCarbamidomethyl [C7; C12]; 1xTMTpro_zero [N-Term]	0	3.511e-05	1	-0.227038	21.9832	-1.11946	0.308153	0.923183	-5.96535	1991	1	FALSE
IVNTPEVIR	Q9QXY6	1xTMTpro_zero [N-Term]	0	0.002765	1	-0.226949	22.4924	-1.4787	0.192556	0.81321	-5.55315	1992	1	FALSE
LCLPYIPQLTDEDR	Q6ZQ18	1xCarbamidomethyl [C2]; 1xTMTpro_zero [N-Term]	0	0.0004175	3	-0.226939	21.3086	-1.36018	0.225407	0.854961	-5.69567	1993	1	FALSE
AVIAPSGVEK	O09111	1xTMTpro_zero [K10]; 1xTMTpro_zero [N-Term]	0	3.511e-05	1	-0.226911	24.9624	-1.17825	0.285811	0.903965	-5.90229	1994	1	FALSE
LSQTLVK	Q80U49	1xTMTpro_zero [K7]; 1xTMTpro_zero [N-Term]	0	0.0006272	0	-0.226651	22.4988	-1.33556	0.232848	0.860175	-5.72456	1995	1	FALSE
DPWPVPQGK	Q01405	1xTMTpro_zero [K9]; 1xTMTpro_zero [N-Term]	0	0.0002861	1	-0.22665	21.3753	-1.58679	0.166565	0.777312	-5.41879	1996	1	FALSE
QASQAGPGPR	O88935	1xTMTpro_zero [N-Term]	0	3.511e-05	0	-0.226643	24.155	-1.42964	0.205573	0.829995	-5.6128	1997	1	FALSE
YPDYEVTWADDGY	Q9DAK9	1xTMTpro_zero [N-Term]	0	0.001031	4	-0.226621	20.4967	-1.01254	0.352556	0.944738	-6.07467	1998	1	FALSE
DHAVFTR	P63037	1xTMTpro_zero [N-Term]	0	0.00233	1	-0.226491	21.8212	-1.45207	0.199523	0.822036	-5.58564	1999	1	FALSE
[truncated: 11,906 more rows]

## Sheet: UEvsFT_proteins
Protein.FDR.Confidence..Combined	Master	Accession	Description	X..Peptides	X..PSMs	X..Unique.Peptides	X..Protein.Groups	Modifications	logFC	AveExpr	t	P.Value	adj.P.Val	B
High	Master Protein	P16546	Spectrin alpha chain, non-erythrocytic 1 OS=Mus musculus OX=10090 GN=Sptan1 PE=1 SV=4	160	1139	159	1	NA	0.0200152	33.134	0.135871	0.896852	0.99666	-6.22677
High	Master Protein	Q9QXS1	Plectin OS=Mus musculus OX=10090 GN=Plec PE=1 SV=3	212	1088	211	1	NA	0.0164506	31.3047	0.115805	0.911997	0.99666	-6.22964
High	Master Protein	Q9JHU4	Cytoplasmic dynein 1 heavy chain 1 OS=Mus musculus OX=10090 GN=Dync1h1 PE=1 SV=2	194	1048	194	1	NA	0.0272641	31.8763	0.188441	0.85742	0.99666	-6.21709
High	Master Protein	Q62261	Spectrin beta chain, non-erythrocytic 1 OS=Mus musculus OX=10090 GN=Sptbn1 PE=1 SV=2	133	966	126	1	Phospho [S2102; S2127; S2137; T2334; S2340]	-0.0262742	32.8668	-0.176393	0.866421	0.99666	-6.21958
High	Master Protein	O88737	Protein bassoon OS=Mus musculus OX=10090 GN=Bsn PE=1 SV=4	125	847	122	1	Phospho [S105; S865; S1236; S1491; S2046; S2591; S2592; T2595; T2622; S2808; S2858; S2860; S2866; S2908; S3022; S3024]	-0.0594127	31.405	-0.412541	0.695838	0.99666	-6.14174
High	Master Protein	Q68FD5	Clathrin heavy chain 1 OS=Mus musculus OX=10090 GN=Cltc PE=1 SV=3	94	815	94	1	Phospho [S147]	0.0233562	33.5911	0.16155	0.877541	0.99666	-6.22243
High	Master Protein	Q9QYR6	Microtubule-associated protein 1A OS=Mus musculus OX=10090 GN=Map1a PE=1 SV=2	114	798	112	1	Phospho [S114; S117; S526; S527; S667; S890; T893; S895; S898; S899; S981; S1023; S1062; S1205; S1606; T1633; S1634; T1636; S1648; S1768; S1772; S1789; T2182]	-0.0926901	32.8685	-0.63038	0.554199	0.99666	-6.01883
High	Master Protein	P20357	Microtubule-associated protein 2 OS=Mus musculus OX=10090 GN=Map2 PE=1 SV=2	97	769	97	1	Phospho [S608; T1160; S1352; T1606; T1609; T1781; S1783; S1785; S1796]	0.0208821	33.0892	0.142113	0.89215	0.99666	-6.22578
High	Master Protein	Q8C8R3	Ankyrin-2 OS=Mus musculus OX=10090 GN=Ank2 PE=1 SV=2	126	717	116	1	Phospho [S846; S1562; S1722; T3046; T3050; S3053; T3413; T3717; T3718; T3745; T3750; S3781; S3786]	-0.104974	31.1524	-0.77923	0.468649	0.99666	-5.90969
High	Master Protein	P14873	Microtubule-associated protein 1B OS=Mus musculus OX=10090 GN=Map1b PE=1 SV=2	103	687	101	1	Phospho [T527; S888; T896; S1013; T1149; S1151; S1260; S1307; S1384; S1391; S1395; S1403; S1497; T1499; S1642; S1649; S1788; S1789; S1793; S1813; S1814; S1815; S1877; Y1883; S1911; T2033]	-0.0859508	32.4482	-0.59977	0.572977	0.99666	-6.03885
High	Master Protein	Q9QYX7	Protein piccolo OS=Mus musculus OX=10090 GN=Pclo PE=1 SV=4	109	602	105	1	Phospho [S1340; S1341; S1829; S1835; T3376]	-0.036053	30.1613	-0.255071	0.808115	0.99666	-6.20039
High	Master Protein	Q05920	Pyruvate carboxylase, mitochondrial OS=Mus musculus OX=10090 GN=Pc PE=1 SV=1	58	587	58	1	Phospho [S142]	0.0264582	34.0082	0.185222	0.859823	0.99666	-6.21777
High	Master Protein	Q6PIC6	Sodium/potassium-transporting ATPase subunit alpha-3 OS=Mus musculus OX=10090 GN=Atp1a3 PE=1 SV=1	48	487	31	1	NA	-0.0683973	32.7874	-0.491106	0.642691	0.99666	-6.10278
High	Master Protein	Q8BPN8	DmX-like protein 2 OS=Mus musculus OX=10090 GN=Dmxl2 PE=1 SV=3	82	455	79	1	Phospho [S1141; S1288; T1293; S1298; S1856; T2017]	0.0174677	29.6318	0.122952	0.906598	0.99666	-6.22867
High	Master Protein	Q8VDN2	Sodium/potassium-transporting ATPase subunit alpha-1 OS=Mus musculus OX=10090 GN=Atp1a1 PE=1 SV=1	39	385	23	1	NA	-0.0615254	30.5782	-0.438997	0.677702	0.99666	-6.12932
High	Master Protein	Q91ZA3	Propionyl-CoA carboxylase alpha chain, mitochondrial OS=Mus musculus OX=10090 GN=Pcca PE=1 SV=2	44	425	44	1	NA	0.0395879	32.6588	0.268535	0.798262	0.99666	-6.19642
High	Master Protein	Q5SWU9	Acetyl-CoA carboxylase 1 OS=Mus musculus OX=10090 GN=Acaca PE=1 SV=1	76	378	76	1	NA	0.00720821	29.8217	0.0480647	0.963395	0.99666	-6.23596
High	Master Protein	Q99104	Unconventional myosin-Va OS=Mus musculus OX=10090 GN=Myo5a PE=1 SV=2	71	396	71	1	Phospho [S600; T602]	-0.0261518	30.0364	-0.189668	0.856505	0.99666	-6.21683
High	Master Protein	Q9Z1B3	1-phosphatidylinositol 4,5-bisphosphate phosphodiesterase beta-1 OS=Mus musculus OX=10090 GN=Plcb1 PE=1 SV=2	58	353	58	1	NA	0.0307185	29.9176	0.210607	0.840924	0.99666	-6.21208
High	Master Protein	P39053	Dynamin-1 OS=Mus musculus OX=10090 GN=Dnm1 PE=1 SV=2	44	337	37	1	NA	-0.0115163	31.6043	-0.078528	0.94024	0.99666	-6.23376
High	Master Protein	Q9QXZ0	Microtubule-actin cross-linking factor 1 OS=Mus musculus OX=10090 GN=Macf1 PE=1 SV=2	90	304	85	1	NA	-0.0535365	28.2343	-0.381069	0.717709	0.99666	-6.15557
High	Master Protein	O08553	Dihydropyrimidinase-related protein 2 OS=Mus musculus OX=10090 GN=Dpysl2 PE=1 SV=2	31	432	26	1	Phospho [T509; T514]	0.00664005	33.0106	0.0467996	0.964357	0.99666	-6.23603
High	Master Protein	Q61879	Myosin-10 OS=Mus musculus OX=10090 GN=Myh10 PE=1 SV=2	66	250	56	1	NA	0.0402725	28.7594	0.256603	0.806991	0.99666	-6.19995
High	Master Protein	P70398	Probable ubiquitin carboxyl-terminal hydrolase FAF-X OS=Mus musculus OX=10090 GN=Usp9x PE=1 SV=2	62	303	62	1	NA	0.122757	28.7465	0.732058	0.494704	0.99666	-5.94632
High	Master Protein	Q8CHC4	Synaptojanin-1 OS=Mus musculus OX=10090 GN=Synj1 PE=1 SV=3	49	324	49	1	Phospho [S1147]	0.069426	30.6811	0.489278	0.643903	0.99666	-6.10376
High	Master Protein	Q7TSJ2	Microtubule-associated protein 6 OS=Mus musculus OX=10090 GN=Map6 PE=1 SV=2	47	301	47	1	NA	0.0271222	30.4633	0.188635	0.857275	0.99666	-6.21705
High	Master Protein	P08553	Neurofilament medium polypeptide OS=Mus musculus OX=10090 GN=Nefm PE=1 SV=4	46	293	41	1	Phospho [S720; S723]	0.0252959	32.3999	0.175321	0.867223	0.99666	-6.2198
High	Master Protein	E9Q3L2	Phosphatidylinositol 4-kinase alpha OS=Mus musculus OX=10090 GN=Pi4ka PE=1 SV=2	59	289	59	1	NA	0.0362433	28.5867	0.243971	0.816267	0.99666	-6.20352
High	Master Protein	Q7TPR4	Alpha-actinin-1 OS=Mus musculus OX=10090 GN=Actn1 PE=1 SV=1	43	265	24	1	NA	-0.00301732	30.0354	-0.0209004	0.984077	0.99666	-6.23703
High	Master Protein	O08599	Syntaxin-binding protein 1 OS=Mus musculus OX=10090 GN=Stxbp1 PE=1 SV=2	35	274	35	1	NA	0.0839072	31.7925	0.580113	0.58524	0.99666	-6.05125
High	Master Protein	P57780	Alpha-actinin-4 OS=Mus musculus OX=10090 GN=Actn4 PE=1 SV=1	42	274	25	1	NA	0.0406033	29.2658	0.278598	0.790925	0.99666	-6.19333
High	Master Protein	Q6PIE5	Sodium/potassium-transporting ATPase subunit alpha-2 OS=Mus musculus OX=10090 GN=Atp1a2 PE=1 SV=1	32	263	15	1	NA	-0.0986089	27.2179	-0.690441	0.518511	0.99666	-5.97709
High	Master Protein	Q99MR8	Methylcrotonoyl-CoA carboxylase subunit alpha, mitochondrial OS=Mus musculus OX=10090 GN=Mccc1 PE=1 SV=2	28	243	28	1	NA	0.0167528	30.905	0.114616	0.912897	0.99666	-6.2298
High	Master Protein	Q9QWI6	SRC kinase signaling inhibitor 1 OS=Mus musculus OX=10090 GN=Srcin1 PE=1 SV=2	42	246	42	1	Phospho [Y464; S588]	0.0167767	29.354	0.116392	0.911554	0.99666	-6.22956
High	Master Protein	G5E8K5	Ankyrin-3 OS=Mus musculus OX=10090 GN=Ank3 PE=1 SV=1	48	249	37	1	Phospho [S1883]	0.0272533	28.245	0.191009	0.855505	0.99666	-6.21654
High	Master Protein	P68369	Tubulin alpha-1A chain OS=Mus musculus OX=10090 GN=Tuba1a PE=1 SV=1	24	487	7	1	NA	0.0438334	34.3859	0.296703	0.777786	0.99666	-6.18748
High	Master Protein	Q9R0K7	Plasma membrane calcium-transporting ATPase 2 OS=Mus musculus OX=10090 GN=Atp2b2 PE=1 SV=2	39	233	28	1	NA	0.0456158	29.7289	0.303275	0.773036	0.99666	-6.18527
High	Master Protein	E9Q401	Ryanodine receptor 2 OS=Mus musculus OX=10090 GN=Ryr2 PE=1 SV=1	59	240	59	1	NA	-0.0278565	27.7056	-0.193041	0.85399	0.99666	-6.2161
High	Master Protein	P46460	Vesicle-fusing ATPase OS=Mus musculus OX=10090 GN=Nsf PE=1 SV=2	39	255	39	1	NA	0.0870513	30.2881	0.605223	0.569603	0.99666	-6.03535
High	Master Protein	P63017	Heat shock cognate 71 kDa protein OS=Mus musculus OX=10090 GN=Hspa8 PE=1 SV=1	36	257	23	1	NA	-0.00985172	31.19	-0.0680289	0.948214	0.99666	-6.23464
High	Master Protein	Q9WV92	Band 4.1-like protein 3 OS=Mus musculus OX=10090 GN=Epb41l3 PE=1 SV=1	41	239	36	1	Phospho [T64; S486; T488; T495]	-0.0385685	29.9631	-0.264547	0.801176	0.99666	-6.19762
High	Master Protein	P68368	Tubulin alpha-4A chain OS=Mus musculus OX=10090 GN=Tuba4a PE=1 SV=1	22	465	5	1	NA	0.00703771	31.6595	0.0484391	0.96311	0.99666	-6.23594
High	Master Protein	P08551	Neurofilament light polypeptide OS=Mus musculus OX=10090 GN=Nefl PE=1 SV=5	34	264	30	1	NA	0.0092769	31.832	0.063399	0.951733	0.99666	-6.23499
High	Master Protein	Q02053	Ubiquitin-like modifier-activating enzyme 1 OS=Mus musculus OX=10090 GN=Uba1 PE=1 SV=1	35	221	35	1	NA	0.00962359	29.536	0.0676466	0.948505	0.99666	-6.23467
High	Master Protein	Q9WUA3	ATP-dependent 6-phosphofructokinase, platelet type OS=Mus musculus OX=10090 GN=Pfkp PE=1 SV=1	31	217	28	1	NA	-0.117994	29.5926	-0.802541	0.456143	0.99666	-5.89093
High	Master Protein	Q99P72	Reticulon-4 OS=Mus musculus OX=10090 GN=Rtn4 PE=1 SV=2	41	196	41	1	Phospho [S165; S167; S179; S838]	-0.0498285	29.4999	-0.30713	0.770255	0.99666	-6.18395
High	Master Protein	Q9EPN1	Neurobeachin OS=Mus musculus OX=10090 GN=Nbea PE=1 SV=1	46	209	46	1	Phospho [S999; S1519]	0.0375399	28.1926	0.251947	0.810406	0.99666	-6.20129
High	Master Protein	P17710	Hexokinase-1 OS=Mus musculus OX=10090 GN=Hk1 PE=1 SV=3	35	205	35	1	NA	0.0304238	29.708	0.20294	0.84662	0.99666	-6.21388
High	Master Protein	P68372	Tubulin beta-4B chain OS=Mus musculus OX=10090 GN=Tubb4b PE=1 SV=1	23	330	1	1	NA	-0.0560944	32.6147	-0.383563	0.715964	0.99666	-6.15451
High	Master Protein	P99024	Tubulin beta-5 chain OS=Mus musculus OX=10090 GN=Tubb5 PE=1 SV=1	23	331	4	1	NA	0.0592724	28.8394	0.405081	0.700993	0.99666	-6.14511
High	Master Protein	Q71LX4	Talin-2 OS=Mus musculus OX=10090 GN=Tln2 PE=1 SV=3	53	182	48	1	NA	0.00470572	27.6866	0.0330201	0.974846	0.99666	-6.23666
High	Master Protein	Q9D6F9	Tubulin beta-4A chain OS=Mus musculus OX=10090 GN=Tubb4a PE=1 SV=3	22	325	4	1	NA	-0.0850674	28.1669	-0.607642	0.56811	0.99666	-6.03379
High	Master Protein	P19096	Fatty acid synthase OS=Mus musculus OX=10090 GN=Fasn PE=1 SV=2	50	211	50	1	NA	0.0540563	28.0153	0.373441	0.723057	0.99666	-6.15877
High	Master Protein	G5E829	Plasma membrane calcium-transporting ATPase 1 OS=Mus musculus OX=10090 GN=Atp2b1 PE=1 SV=1	34	210	19	1	NA	0.0256855	28.8311	0.172953	0.868995	0.99666	-6.22026
High	Master Protein	Q80TJ1	Calcium-dependent secretion activator 1 OS=Mus musculus OX=10090 GN=Cadps PE=1 SV=3	40	209	32	1	NA	-0.0245746	28.9987	-0.163702	0.875927	0.99666	-6.22203
High	Master Protein	Q01853	Transitional endoplasmic reticulum ATPase OS=Mus musculus OX=10090 GN=Vcp PE=1 SV=4	36	197	36	1	NA	0.0161087	29.407	0.106507	0.91903	0.99666	-6.23082
High	Master Protein	Q7TMM9	Tubulin beta-2A chain OS=Mus musculus OX=10090 GN=Tubb2a PE=1 SV=1	23	292	1	1	NA	0.0448173	30.2706	0.323384	0.758574	0.99666	-6.17821
High	Master Protein	P46660	Alpha-internexin OS=Mus musculus OX=10090 GN=Ina PE=1 SV=3	34	216	29	1	NA	0.0383279	31.1066	0.256814	0.806837	0.99666	-6.19989
High	Master Protein	P60710	Actin, cytoplasmic 1 OS=Mus musculus OX=10090 GN=Actb PE=1 SV=1	17	303	9	1	NA	0.0173893	32.6436	0.116085	0.911786	0.99666	-6.2296
High	Master Protein	Q9ERD7	Tubulin beta-3 chain OS=Mus musculus OX=10090 GN=Tubb3 PE=1 SV=1	21	332	6	1	NA	0.0261142	29.6699	0.179615	0.864011	0.99666	-6.21893
High	Master Protein	O88935	Synapsin-1 OS=Mus musculus OX=10090 GN=Syn1 PE=1 SV=2	26	197	24	1	Phospho [S510; T512; S553]	-0.0173146	30.3314	-0.114307	0.91313	0.99666	-6.22984
High	Master Protein	Q9CWF2	Tubulin beta-2B chain OS=Mus musculus OX=10090 GN=Tubb2b PE=1 SV=1	23	289	1	1	NA	0.145628	23.4408	0.902357	0.40537	0.99666	-5.80583
High	Master Protein	Q9DBG3	AP-2 complex subunit beta OS=Mus musculus OX=10090 GN=Ap2b1 PE=1 SV=1	39	230	23	1	NA	0.0459768	28.9821	0.323516	0.758479	0.99666	-6.17816
High	Master Protein	P15508	Spectrin beta chain, erythrocytic OS=Mus musculus OX=10090 GN=Sptb PE=1 SV=4	52	173	45	1	NA	-0.137924	26.4929	-0.912082	0.400664	0.99666	-5.79714
High	Master Protein	P52480	Pyruvate kinase PKM OS=Mus musculus OX=10090 GN=Pkm PE=1 SV=4	27	217	27	1	NA	-0.053947	30.2791	-0.362264	0.730924	0.99666	-6.16334
High	Master Protein	Q62108	Disks large homolog 4 OS=Mus musculus OX=10090 GN=Dlg4 PE=1 SV=1	31	166	27	1	NA	0.0295519	29.8844	0.20179	0.847475	0.99666	-6.21414
High	Master Protein	Q4KMM3	Oxidation resistance protein 1 OS=Mus musculus OX=10090 GN=Oxr1 PE=1 SV=3	39	192	39	1	Phospho [T203; S204]	-0.078227	29.1364	-0.574447	0.588804	0.99666	-6.05476
High	Master Protein	Q8K0U4	Heat shock 70 kDa protein 12A OS=Mus musculus OX=10090 GN=Hspa12a PE=1 SV=1	28	198	28	1	NA	0.00509826	29.7159	0.0361014	0.9725	0.99666	-6.23654
High	Master Protein	P50516	V-type proton ATPase catalytic subunit A OS=Mus musculus OX=10090 GN=Atp6v1a PE=1 SV=2	28	177	28	1	NA	-0.00323672	29.517	-0.0226539	0.982741	0.99666	-6.23699
High	Master Protein	P11499	Heat shock protein HSP 90-beta OS=Mus musculus OX=10090 GN=Hsp90ab1 PE=1 SV=3	31	200	20	1	Phospho [S255]	-0.00034047	30.1407	-0.0023931	0.998177	0.998948	-6.23728
High	Master Protein	P28652	Calcium/calmodulin-dependent protein kinase type II subunit beta OS=Mus musculus OX=10090 GN=Camk2b PE=1 SV=2	21	234	14	1	Phospho [T398]	-0.0493911	30.5027	-0.312585	0.766327	0.99666	-6.18205
High	Master Protein	P07901	Heat shock protein HSP 90-alpha OS=Mus musculus OX=10090 GN=Hsp90aa1 PE=1 SV=4	30	199	20	1	NA	-0.181671	29.2071	-1.24706	0.263807	0.99666	-5.46172
High	Master Protein	Q8K1M6	Dynamin-1-like protein OS=Mus musculus OX=10090 GN=Dnm1l PE=1 SV=2	33	152	33	1	NA	0.0431619	30.2691	0.301811	0.774093	0.99666	-6.18576
High	Master Protein	P17426	AP-2 complex subunit alpha-1 OS=Mus musculus OX=10090 GN=Ap2a1 PE=1 SV=1	34	174	20	1	NA	-0.0413667	28.2976	-0.299976	0.775419	0.99666	-6.18638
High	Master Protein	P11881	Inositol 1,4,5-trisphosphate receptor type 1 OS=Mus musculus OX=10090 GN=Itpr1 PE=1 SV=2	49	191	49	1	NA	-0.028218	27.7187	-0.198979	0.849567	0.99666	-6.21478
High	Master Protein	Q91ZU6	Dystonin OS=Mus musculus OX=10090 GN=Dst PE=1 SV=2	54	154	50	1	NA	0.039301	30.1022	0.276212	0.792663	0.99666	-6.19407
High	Master Protein	Q6ZQ38	Cullin-associated NEDD8-dissociated protein 1 OS=Mus musculus OX=10090 GN=Cand1 PE=1 SV=2	37	200	37	1	NA	0.0402708	28.3456	0.273562	0.794594	0.99666	-6.19489
High	Master Protein	Q61316	Heat shock 70 kDa protein 4 OS=Mus musculus OX=10090 GN=Hspa4 PE=1 SV=1	32	190	29	1	NA	-0.0897328	28.3088	-0.605617	0.569359	0.99666	-6.03509
High	Master Protein	P70336	Rho-associated protein kinase 2 OS=Mus musculus OX=10090 GN=Rock2 PE=1 SV=1	45	196	44	1	NA	0.116193	28.5633	0.752561	0.483257	0.99666	-5.93063
High	Master Protein	Q5SQX6	Cytoplasmic FMR1-interacting protein 2 OS=Mus musculus OX=10090 GN=Cyfip2 PE=1 SV=2	32	168	16	1	NA	0.0178095	28.2399	0.120178	0.908693	0.99666	-6.22905
High	Master Protein	P63318	Protein kinase C gamma type OS=Mus musculus OX=10090 GN=Prkcg PE=1 SV=1	30	162	27	1	Phospho [T655]	-0.0115416	30.0222	-0.0763379	0.941903	0.99666	-6.23396
High	Master Protein	P11798	Calcium/calmodulin-dependent protein kinase type II subunit alpha OS=Mus musculus OX=10090 GN=Camk2a PE=1 SV=2	23	245	17	1	Phospho [S333; T334; T336; T337]	0.0274517	33.2976	0.177808	0.865363	0.99666	-6.2193
High	Master Protein	Q91XM9	Disks large homolog 2 OS=Mus musculus OX=10090 GN=Dlg2 PE=1 SV=2	28	165	25	1	Phospho [S65]	-0.0769093	28.486	-0.531527	0.61622	0.99666	-6.08033
High	Master Protein	P16330	2',3'-cyclic-nucleotide 3'-phosphodiesterase OS=Mus musculus OX=10090 GN=Cnp PE=1 SV=3	24	163	24	1	NA	0.0640602	29.3881	0.426916	0.685954	0.99666	-6.13508
High	Master Protein	Q9ES97	Reticulon-3 OS=Mus musculus OX=10090 GN=Rtn3 PE=1 SV=2	26	153	26	1	NA	0.0547469	28.7763	0.336859	0.748943	0.99666	-6.17324
High	Master Protein	Q03265	ATP synthase subunit alpha, mitochondrial OS=Mus musculus OX=10090 GN=Atp5f1a PE=1 SV=1	28	165	28	1	NA	0.0848361	29.6915	0.599648	0.573052	0.99666	-6.03893
High	Master Protein	Q920I9	WD repeat-containing protein 7 OS=Mus musculus OX=10090 GN=Wdr7 PE=1 SV=3	33	165	33	1	NA	0.0378566	28.1428	0.282593	0.788019	0.99666	-6.19207
High	Master Protein	Q3UHJ0	AP2-associated protein kinase 1 OS=Mus musculus OX=10090 GN=Aak1 PE=1 SV=2	30	137	30	1	Phospho [S650]	-0.0615708	27.8113	-0.44967	0.670453	0.99666	-6.12411
High	Master Protein	Q8BRT1	CLIP-associating protein 2 OS=Mus musculus OX=10090 GN=Clasp2 PE=1 SV=1	32	149	28	1	NA	-0.104531	27.9171	-0.636505	0.550488	0.99666	-6.01472
High	Master Protein	O55143	Sarcoplasmic/endoplasmic reticulum calcium ATPase 2 OS=Mus musculus OX=10090 GN=Atp2a2 PE=1 SV=2	34	168	34	1	NA	0.122549	29.0482	0.422242	0.689161	0.99666	-6.13727
High	Master Protein	P16858	Glyceraldehyde-3-phosphate dehydrogenase OS=Mus musculus OX=10090 GN=Gapdh PE=1 SV=2	16	185	16	1	NA	-0.066656	31.5778	-0.471242	0.655923	0.99666	-6.11322
High	Master Protein	Q04447	Creatine kinase B-type OS=Mus musculus OX=10090 GN=Ckb PE=1 SV=1	16	181	16	1	NA	0.0193923	31.6536	0.131265	0.900324	0.99666	-6.22747
High	Master Protein	P97427	Dihydropyrimidinase-related protein 1 OS=Mus musculus OX=10090 GN=Crmp1 PE=1 SV=1	24	180	20	1	NA	0.0469573	28.9258	0.310389	0.767907	0.99666	-6.18282
High	Master Protein	Q3UNH4	G protein-regulated inducer of neurite outgrowth 1 OS=Mus musculus OX=10090 GN=Gprin1 PE=1 SV=2	35	173	35	1	NA	-0.133619	27.8169	-0.931359	0.391462	0.99666	-5.77973
High	Master Protein	P05064	Fructose-bisphosphate aldolase A OS=Mus musculus OX=10090 GN=Aldoa PE=1 SV=2	26	163	19	1	Phospho [S36]	0.0347748	30.5528	0.232548	0.824684	0.99666	-6.20659
High	Master Protein	Q9Z0E0	Neurochondrin OS=Mus musculus OX=10090 GN=Ncdn PE=1 SV=1	27	153	27	1	NA	-0.0125075	28.4751	-0.0910997	0.930702	0.99666	-6.23255
High	Master Protein	Q9QXS6	Drebrin OS=Mus musculus OX=10090 GN=Dbn1 PE=1 SV=4	20	130	20	1	Phospho [S141; S142; S343; S344; S387]	-0.125421	28.653	-0.911748	0.400825	0.99666	-5.79744
High	Master Protein	F6SEU4	Ras/Rap GTPase-activating protein SynGAP OS=Mus musculus OX=10090 GN=Syngap1 PE=1 SV=2	30	137	27	1	NA	0.117584	28.2489	0.860455	0.426135	0.99666	-5.84246
High	Master Protein	P58252	Elongation factor 2 OS=Mus musculus OX=10090 GN=Eef2 PE=1 SV=2	26	136	26	1	NA	0.0584433	28.2338	0.343236	0.744402	0.99666	-6.17082
High	Master Protein	Q04690	Neurofibromin OS=Mus musculus OX=10090 GN=Nf1 PE=1 SV=1	38	149	38	1	Phospho [S2517]	0.00807679	27.2016	0.0509109	0.961229	0.99666	-6.2358
High	Master Protein	P33173	Kinesin-like protein KIF1A OS=Mus musculus OX=10090 GN=Kif1a PE=1 SV=2	39	161	26	1	NA	0.0149856	28.0122	0.101413	0.922887	0.99666	-6.23142
High	Master Protein	Q80TZ3	Putative tyrosine-protein phosphatase auxilin OS=Mus musculus OX=10090 GN=Dnajc6 PE=1 SV=2	23	154	20	1	NA	-0.016347	29.154	-0.110849	0.915745	0.99666	-6.23028
High	Master Protein	Q8VDD5	Myosin-9 OS=Mus musculus OX=10090 GN=Myh9 PE=1 SV=4	40	127	30	1	NA	-0.00331308	26.3777	-0.019911	0.98483	0.99666	-6.23705
High	Master Protein	Q9Z1G4	V-type proton ATPase 116 kDa subunit a isoform 1 OS=Mus musculus OX=10090 GN=Atp6v0a1 PE=1 SV=3	23	150	23	1	NA	0.0650642	28.3168	0.446232	0.672784	0.99666	-6.1258
High	Master Protein	P63101	14-3-3 protein zeta/delta OS=Mus musculus OX=10090 GN=Ywhaz PE=1 SV=1	19	144	13	1	NA	0.0150173	31.1448	0.105307	0.919938	0.99666	-6.23096
High	Master Protein	O54774	AP-3 complex subunit delta-1 OS=Mus musculus OX=10090 GN=Ap3d1 PE=1 SV=1	29	128	29	1	NA	-0.0669604	27.8297	-0.418683	0.691606	0.99666	-6.13892
High	Master Protein	P68404	Protein kinase C beta type OS=Mus musculus OX=10090 GN=Prkcb PE=1 SV=4	24	164	13	1	NA	-0.007167	28.7387	-0.0480282	0.963422	0.99666	-6.23597
High	Master Protein	Q9QXL2	Kinesin-like protein KIF21A OS=Mus musculus OX=10090 GN=Kif21a PE=1 SV=2	31	122	30	1	NA	-0.0773552	29.2219	-0.555877	0.600576	0.99666	-6.06604
High	Master Protein	Q8C419	Probable G-protein coupled receptor 158 OS=Mus musculus OX=10090 GN=Gpr158 PE=1 SV=2	28	154	28	1	Phospho [S902]	-0.102973	28.2365	-0.689285	0.519183	0.99666	-5.97792
High	Master Protein	Q91V92	ATP-citrate synthase OS=Mus musculus OX=10090 GN=Acly PE=1 SV=1	30	136	30	1	NA	0.0907332	27.5253	0.629674	0.554627	0.99666	-6.0193
High	Master Protein	Q8CHG7	Rap guanine nucleotide exchange factor 2 OS=Mus musculus OX=10090 GN=Rapgef2 PE=1 SV=2	32	160	32	1	NA	0.023005	27.6411	0.159809	0.878848	0.99666	-6.22275
High	Master Protein	Q61699	Heat shock protein 105 kDa OS=Mus musculus OX=10090 GN=Hsph1 PE=1 SV=2	25	139	23	1	NA	0.0918983	27.6123	0.615397	0.563341	0.99666	-6.02874
High	Master Protein	Q91XV3	Brain acid soluble protein 1 OS=Mus musculus OX=10090 GN=Basp1 PE=1 SV=3	15	115	15	1	Phospho [T36]	-0.0831768	30.5519	-0.568049	0.592844	0.99666	-6.05868
High	Master Protein	Q6ZPE2	Myotubularin-related protein 5 OS=Mus musculus OX=10090 GN=Sbf1 PE=1 SV=2	31	142	31	1	Phospho [S706]	0.00292124	27.1542	0.0212675	0.983797	0.99666	-6.23702
High	Master Protein	Q9QVP9	Protein-tyrosine kinase 2-beta OS=Mus musculus OX=10090 GN=Ptk2b PE=1 SV=2	33	144	33	1	NA	-0.12877	27.7376	-0.898317	0.407337	0.99666	-5.80941
High	Master Protein	P48722	Heat shock 70 kDa protein 4L OS=Mus musculus OX=10090 GN=Hspa4l PE=1 SV=2	28	142	26	1	NA	0.106261	27.7045	0.788973	0.463392	0.99666	-5.9019
High	Master Protein	Q9JI91	Alpha-actinin-2 OS=Mus musculus OX=10090 GN=Actn2 PE=1 SV=2	26	138	15	1	NA	0.350838	26.7226	2.01127	0.0963461	0.99666	-4.53693
High	Master Protein	Q9JJZ2	Tubulin alpha-8 chain OS=Mus musculus OX=10090 GN=Tuba8 PE=1 SV=1	15	335	3	1	NA	0.154897	23.3126	1.07455	0.328291	0.99666	-5.64267
High	Master Protein	P56480	ATP synthase subunit beta, mitochondrial OS=Mus musculus OX=10090 GN=Atp5f1b PE=1 SV=2	21	137	21	1	NA	0.104442	28.1313	0.730716	0.49546	0.99666	-5.94734
High	Master Protein	P19246	Neurofilament heavy polypeptide OS=Mus musculus OX=10090 GN=Nefh PE=1 SV=3	30	153	27	1	Phospho [T839]	-0.0158935	28.6387	-0.109907	0.916458	0.99666	-6.2304
High	Master Protein	Q80U49	Centrosomal protein of 170 kDa protein B OS=Mus musculus OX=10090 GN=Cep170b PE=1 SV=2	36	152	33	1	NA	-0.0453734	29.0205	-0.317288	0.762946	0.99666	-6.18039
High	Master Protein	Q64332	Synapsin-2 OS=Mus musculus OX=10090 GN=Syn2 PE=1 SV=2	22	128	19	1	NA	-0.037752	29.5219	-0.254441	0.808576	0.99666	-6.20057
High	Master Protein	P60469	Liprin-alpha-3 OS=Mus musculus OX=10090 GN=Ppfia3 PE=1 SV=2	32	149	30	1	NA	0.00577118	27.9534	0.040657	0.969032	0.99666	-6.23634
High	Master Protein	P62814	V-type proton ATPase subunit B, brain isoform OS=Mus musculus OX=10090 GN=Atp6v1b2 PE=1 SV=1	23	139	23	1	NA	-0.0236816	29.9366	-0.162302	0.876977	0.99666	-6.22229
High	Master Protein	Q80Z38	SH3 and multiple ankyrin repeat domains protein 2 OS=Mus musculus OX=10090 GN=Shank2 PE=1 SV=2	32	142	32	1	Phospho [S729; T730]	0.00354656	27.7736	0.0237865	0.981878	0.99666	-6.23696
High	Master Protein	Q8R0S2	IQ motif and SEC7 domain-containing protein 1 OS=Mus musculus OX=10090 GN=Iqsec1 PE=1 SV=2	29	136	24	1	Phospho [S415]	0.13144	28.7643	0.770172	0.473575	0.99666	-5.91687
High	Master Protein	Q76MZ3	Serine/threonine-protein phosphatase 2A 65 kDa regulatory subunit A alpha isoform OS=Mus musculus OX=10090 GN=Ppp2r1a PE=1 SV=3	27	136	27	1	NA	0.0868579	28.2509	0.579803	0.585434	0.99666	-6.05144
High	Master Protein	P56399	Ubiquitin carboxyl-terminal hydrolase 5 OS=Mus musculus OX=10090 GN=Usp5 PE=1 SV=1	29	137	29	1	NA	0.281557	29.3099	1.95877	0.103276	0.99666	-4.6038
High	Master Protein	Q922S4	cGMP-dependent 3',5'-cyclic phosphodiesterase OS=Mus musculus OX=10090 GN=Pde2a PE=1 SV=4	27	110	27	1	Phospho [S911]	0.0739511	27.4782	0.509596	0.630505	0.99666	-6.09271
High	Master Protein	Q8BZ98	Dynamin-3 OS=Mus musculus OX=10090 GN=Dnm3 PE=1 SV=1	22	150	15	1	NA	-0.0788892	26.3693	-0.508028	0.631534	0.99666	-6.09358
High	Master Protein	Q9Z2H5	Band 4.1-like protein 1 OS=Mus musculus OX=10090 GN=Epb41l1 PE=1 SV=2	23	130	21	1	NA	-0.0959346	28.0854	-0.551163	0.603586	0.99666	-6.06885
High	Master Protein	Q61548	Clathrin coat assembly protein AP180 OS=Mus musculus OX=10090 GN=Snap91 PE=1 SV=1	18	123	17	1	Phospho [S300; S600]	-0.181912	28.2876	-1.32308	0.23914	0.99666	-5.37736
High	Master Protein	Q8BGQ7	Alanine--tRNA ligase, cytoplasmic OS=Mus musculus OX=10090 GN=Aars PE=1 SV=1	26	124	26	1	NA	-0.0306307	27.2383	-0.212654	0.839405	0.99666	-6.21159
High	Master Protein	Q3UHL1	CaM kinase-like vesicle-associated protein OS=Mus musculus OX=10090 GN=Camkv PE=1 SV=2	21	134	21	1	NA	0.0101021	28.2598	0.0701853	0.946576	0.99666	-6.23447
High	Master Protein	O35927	Catenin delta-2 OS=Mus musculus OX=10090 GN=Ctnnd2 PE=1 SV=1	25	107	23	1	Phospho [S457; S458; S1098]	-0.0229132	27.5993	-0.159847	0.878819	0.99666	-6.22274
High	Master Protein	Q6P9K8	Caskin-1 OS=Mus musculus OX=10090 GN=Caskin1 PE=1 SV=2	27	124	27	1	Phospho [S791; S1259]	-0.0167253	27.4006	-0.103361	0.921412	0.99666	-6.23119
High	Master Protein	D3YZU1	SH3 and multiple ankyrin repeat domains protein 1 OS=Mus musculus OX=10090 GN=Shank1 PE=1 SV=1	28	118	28	1	Phospho [S413]	-0.0751027	27.1632	-0.555751	0.600656	0.99666	-6.06611
High	Master Protein	Q9WU78	Programmed cell death 6-interacting protein OS=Mus musculus OX=10090 GN=Pdcd6ip PE=1 SV=3	28	137	28	1	NA	-0.0494121	28.3125	-0.321251	0.760102	0.99666	-6.17898
High	Master Protein	Q0KL02	Triple functional domain protein OS=Mus musculus OX=10090 GN=Trio PE=1 SV=3	38	115	31	1	NA	0.2314	26.9549	1.68803	0.147934	0.99666	-4.944
High	Master Protein	Q61644	Protein kinase C and casein kinase substrate in neurons protein 1 OS=Mus musculus OX=10090 GN=Pacsin1 PE=1 SV=1	20	141	20	1	NA	-0.0349607	30.1817	-0.245828	0.814901	0.99666	-6.203
High	Master Protein	P17427	AP-2 complex subunit alpha-2 OS=Mus musculus OX=10090 GN=Ap2a2 PE=1 SV=2	27	133	13	1	NA	0.0745483	25.9794	0.418121	0.691993	0.99666	-6.13918
High	Master Protein	Q9JLM8	Serine/threonine-protein kinase DCLK1 OS=Mus musculus OX=10090 GN=Dclk1 PE=1 SV=1	20	121	20	1	NA	-0.029761	27.7837	-0.194863	0.852632	0.99666	-6.2157
High	Master Protein	Q3UPL0	Protein transport protein Sec31A OS=Mus musculus OX=10090 GN=Sec31a PE=1 SV=2	29	129	29	1	NA	0.102297	27.4496	0.716825	0.503329	0.99666	-5.95776
High	Master Protein	Q99KI0	Aconitate hydratase, mitochondrial OS=Mus musculus OX=10090 GN=Aco2 PE=1 SV=1	24	119	24	1	NA	-0.0104795	28.3429	-0.0713152	0.945717	0.99666	-6.23438
High	Master Protein	Q02248	Catenin beta-1 OS=Mus musculus OX=10090 GN=Ctnnb1 PE=1 SV=1	27	120	21	1	NA	0.0141316	27.8462	0.0949266	0.927801	0.99666	-6.23214
High	Master Protein	P70175	Disks large homolog 3 OS=Mus musculus OX=10090 GN=Dlg3 PE=1 SV=1	21	108	20	1	NA	-0.022332	27.3541	-0.148687	0.887203	0.99666	-6.22469
High	Master Protein	O35643	AP-1 complex subunit beta-1 OS=Mus musculus OX=10090 GN=Ap1b1 PE=1 SV=2	26	142	10	1	NA	0.0422966	26.0326	0.278517	0.790984	0.99666	-6.19335
High	Master Protein	Q9JME5	AP-3 complex subunit beta-2 OS=Mus musculus OX=10090 GN=Ap3b2 PE=1 SV=2	25	130	25	1	NA	-0.0416962	27.5973	-0.289238	0.783194	0.99666	-6.18993
High	Master Protein	P46096	Synaptotagmin-1 OS=Mus musculus OX=10090 GN=Syt1 PE=1 SV=1	20	122	14	1	NA	0.0502536	29.7197	0.336333	0.749318	0.99666	-6.17344
High	Master Protein	Q9QZQ1	Afadin OS=Mus musculus OX=10090 GN=Afdn PE=1 SV=3	34	123	34	1	Phospho [S1719]	0.0967975	27.6787	0.621591	0.55955	0.99666	-6.02467
High	Master Protein	Q6Q477	Plasma membrane calcium-transporting ATPase 4 OS=Mus musculus OX=10090 GN=Atp2b4 PE=1 SV=1	20	109	9	1	NA	-0.0624609	25.2718	-0.397652	0.706146	0.99666	-6.14841
High	Master Protein	Q61301	Catenin alpha-2 OS=Mus musculus OX=10090 GN=Ctnna2 PE=1 SV=3	21	112	21	1	Phospho [T261; T264; S640]	-0.0148995	26.9606	-0.0799545	0.939157	0.99666	-6.23364
High	Master Protein	P47857	ATP-dependent 6-phosphofructokinase, muscle type OS=Mus musculus OX=10090 GN=Pfkm PE=1 SV=3	24	122	21	1	NA	0.143169	27.9206	1.0513	0.337935	0.99666	-5.6658
High	Master Protein	Q8BKX1	Brain-specific angiogenesis inhibitor 1-associated protein 2 OS=Mus musculus OX=10090 GN=Baiap2 PE=1 SV=2	22	134	22	1	NA	0.0412748	28.2355	0.277022	0.792072	0.99666	-6.19382
High	Master Protein	Q8C0T5	Signal-induced proliferation-associated 1-like protein 1 OS=Mus musculus OX=10090 GN=Sipa1l1 PE=1 SV=2	30	118	30	1	Phospho [S1528]	0.0144821	26.8919	0.10434	0.92067	0.99666	-6.23108
High	Master Protein	Q4KUS2	Protein unc-13 homolog A OS=Mus musculus OX=10090 GN=Unc13a PE=1 SV=3	27	117	27	1	NA	0.160224	27.0214	1.11959	0.310265	0.99666	-5.59696
High	Master Protein	Q8K0T0	Reticulon-1 OS=Mus musculus OX=10090 GN=Rtn1 PE=1 SV=1	20	133	20	1	Phospho [S352]	0.0718397	29.1416	0.462154	0.662024	0.99666	-6.11787
High	Master Protein	P17182	Alpha-enolase OS=Mus musculus OX=10090 GN=Eno1 PE=1 SV=3	16	124	13	1	NA	-0.0292029	28.3429	-0.196089	0.851719	0.99666	-6.21542
High	Master Protein	P63328	Serine/threonine-protein phosphatase 2B catalytic subunit alpha isoform OS=Mus musculus OX=10090 GN=Ppp3ca PE=1 SV=1	16	106	10	1	NA	0.0429803	30.041	0.283587	0.787296	0.99666	-6.19175
High	Master Protein	O70161	Phosphatidylinositol 4-phosphate 5-kinase type-1 gamma OS=Mus musculus OX=10090 GN=Pip5k1c PE=1 SV=2	20	120	20	1	Phospho [S554; S555]	-0.0279874	27.4172	-0.191263	0.855315	0.99666	-6.21648
High	Master Protein	P61982	14-3-3 protein gamma OS=Mus musculus OX=10090 GN=Ywhag PE=1 SV=2	18	131	12	1	NA	-0.0637374	29.6208	-0.42421	0.68781	0.99666	-6.13635
High	Master Protein	Q9QYC0	Alpha-adducin OS=Mus musculus OX=10090 GN=Add1 PE=1 SV=2	18	120	17	1	Phospho [T11; S12]	0.0184395	28.4938	0.115163	0.912483	0.99666	-6.22972
High	Master Protein	P18872	Guanine nucleotide-binding protein G(o) subunit alpha OS=Mus musculus OX=10090 GN=Gnao1 PE=1 SV=3	18	102	16	1	NA	0.0192666	30.7326	0.129971	0.901301	0.99666	-6.22766
High	Master Protein	Q80SW1	S-adenosylhomocysteine hydrolase-like protein 1 OS=Mus musculus OX=10090 GN=Ahcyl1 PE=1 SV=1	20	96	9	1	NA	-0.0804349	27.6842	-0.578977	0.585954	0.99666	-6.05196
High	Master Protein	Q5DU25	IQ motif and SEC7 domain-containing protein 2 OS=Mus musculus OX=10090 GN=Iqsec2 PE=1 SV=3	25	102	20	1	NA	0.0613821	26.844	0.424182	0.687829	0.99666	-6.13637
High	Master Protein	Q60932	Voltage-dependent anion-selective channel protein 1 OS=Mus musculus OX=10090 GN=Vdac1 PE=1 SV=3	15	144	14	1	NA	0.0717993	29.1953	0.498282	0.637947	0.99666	-6.09891
High	Master Protein	P16125	L-lactate dehydrogenase B chain OS=Mus musculus OX=10090 GN=Ldhb PE=1 SV=2	15	118	14	1	NA	0.0580552	28.4289	0.404395	0.701469	0.99666	-6.14542
High	Master Protein	Q8CI94	Glycogen phosphorylase, brain form OS=Mus musculus OX=10090 GN=Pygb PE=1 SV=3	26	126	21	1	NA	0.0889975	29.0093	0.621742	0.559458	0.99666	-6.02457
High	Master Protein	Q91V14	Solute carrier family 12 member 5 OS=Mus musculus OX=10090 GN=Slc12a5 PE=1 SV=2	20	108	15	1	NA	-0.0812006	28.2781	-0.579746	0.58547	0.99666	-6.05148
High	Master Protein	P17751	Triosephosphate isomerase OS=Mus musculus OX=10090 GN=Tpi1 PE=1 SV=4	14	120	14	1	NA	0.0111603	29.8435	0.0807967	0.938518	0.99666	-6.23356
High	Master Protein	Q7TQF7	Amphiphysin OS=Mus musculus OX=10090 GN=Amph PE=1 SV=1	20	94	18	1	Phospho [S500]	0.0159069	27.6224	0.10499	0.920179	0.99666	-6.231
High	Master Protein	Q11011	Puromycin-sensitive aminopeptidase OS=Mus musculus OX=10090 GN=Npepps PE=1 SV=2	24	118	24	1	NA	-0.0731827	27.3963	-0.517648	0.625239	0.99666	-6.08822
High	Master Protein	Q62167	ATP-dependent RNA helicase DDX3X OS=Mus musculus OX=10090 GN=Ddx3x PE=1 SV=3	22	113	4	1	NA	0.159374	27.4988	1.15689	0.295984	0.99666	-5.55825
High	Master Protein	Q8CAA7	Glucose 1,6-bisphosphate synthase OS=Mus musculus OX=10090 GN=Pgm2l1 PE=1 SV=1	22	114	22	1	NA	-0.00472586	28.1201	-0.0337819	0.974266	0.99666	-6.23663
High	Master Protein	Q811P8	Rho GTPase-activating protein 32 OS=Mus musculus OX=10090 GN=Arhgap32 PE=1 SV=2	26	103	26	1	Phospho [S592; S613; S871]	0.0266983	28.2397	0.167279	0.873245	0.99666	-6.22136
High	Master Protein	Q8VD37	SH3-containing GRB2-like protein 3-interacting protein 1 OS=Mus musculus OX=10090 GN=Sgip1 PE=1 SV=1	21	102	21	1	Phospho [S265; T335; S371]	-0.139509	27.3895	-0.948406	0.383465	0.99666	-5.76412
High	Master Protein	Q9JMH9	Unconventional myosin-XVIIIa OS=Mus musculus OX=10090 GN=Myo18a PE=1 SV=2	27	103	27	1	NA	0.038275	26.6557	0.282729	0.78792	0.99666	-6.19202
High	Master Protein	Q811D0	Disks large homolog 1 OS=Mus musculus OX=10090 GN=Dlg1 PE=1 SV=1	23	107	17	1	NA	0.087328	27.269	0.500087	0.636756	0.99666	-6.09793
High	Master Protein	Q922F4	Tubulin beta-6 chain OS=Mus musculus OX=10090 GN=Tubb6 PE=1 SV=1	14	162	1	1	NA	0.976448	25.9001	4.85762	0.00378989	0.494581	-1.34687
High	Master Protein	P68254	14-3-3 protein theta OS=Mus musculus OX=10090 GN=Ywhaq PE=1 SV=1	16	122	10	1	NA	0.033473	28.6519	0.233491	0.823988	0.99666	-6.20634
High	Master Protein	Q9WV34	MAGUK p55 subfamily member 2 OS=Mus musculus OX=10090 GN=Mpp2 PE=1 SV=1	19	84	18	1	NA	-0.0163737	27.8898	-0.110166	0.916262	0.99666	-6.23036
High	Master Protein	Q80TE7	Leucine-rich repeat-containing protein 7 OS=Mus musculus OX=10090 GN=Lrrc7 PE=1 SV=2	24	103	24	1	Phospho [S947; S949]	0.122983	27.1436	0.779923	0.468274	0.99666	-5.90914
High	Master Protein	Q923T9	Calcium/calmodulin-dependent protein kinase type II subunit gamma OS=Mus musculus OX=10090 GN=Camk2g PE=1 SV=1	16	127	11	1	NA	0.0462378	28.6189	0.304659	0.772038	0.99666	-6.18479
High	Master Protein	Q9CQV8	14-3-3 protein beta/alpha OS=Mus musculus OX=10090 GN=Ywhab PE=1 SV=3	17	108	9	1	NA	0.104603	27.0972	0.709847	0.507315	0.99666	-5.96293
High	Master Protein	Q61553	Fascin OS=Mus musculus OX=10090 GN=Fscn1 PE=1 SV=4	23	100	23	1	NA	-0.0137406	28.7269	-0.0949707	0.927768	0.99666	-6.23214
High	Master Protein	P23819	Glutamate receptor 2 OS=Mus musculus OX=10090 GN=Gria2 PE=1 SV=3	23	112	18	1	NA	0.0191872	28.4708	0.129902	0.901352	0.99666	-6.22767
High	Master Protein	Q61481	Calcium/calmodulin-dependent 3',5'-cyclic nucleotide phosphodiesterase 1A OS=Mus musculus OX=10090 GN=Pde1a PE=1 SV=3	17	108	16	1	NA	-0.009318	27.4078	-0.062304	0.952565	0.99666	-6.23507
High	Master Protein	Q9QYB8	Beta-adducin OS=Mus musculus OX=10090 GN=Add2 PE=1 SV=4	20	100	19	1	NA	-0.0334656	28.5439	-0.224515	0.830619	0.99666	-6.20866
High	Master Protein	Q8CC35	Synaptopodin OS=Mus musculus OX=10090 GN=Synpo PE=1 SV=2	15	94	15	1	Phospho [S258]	-0.0257671	28.5606	-0.177843	0.865336	0.99666	-6.21929
High	Master Protein	Q8BH59	Calcium-binding mitochondrial carrier protein Aralar1 OS=Mus musculus OX=10090 GN=Slc25a12 PE=1 SV=1	20	77	20	1	NA	0.0205869	26.8032	0.14882	0.887103	0.99666	-6.22467
High	Master Protein	Q5SSL4	Active breakpoint cluster region-related protein OS=Mus musculus OX=10090 GN=Abr PE=1 SV=1	25	97	24	1	Phospho [T803]	0.076779	27.3468	0.506617	0.63246	0.99666	-6.09436
High	Master Protein	Q8CAQ8	MICOS complex subunit Mic60 OS=Mus musculus OX=10090 GN=Immt PE=1 SV=1	23	96	23	1	NA	-0.0728444	27.604	-0.488148	0.644652	0.99666	-6.10436
High	Master Protein	Q8K596	Sodium/calcium exchanger 2 OS=Mus musculus OX=10090 GN=Slc8a2 PE=1 SV=1	19	87	19	1	NA	0.0143121	27.3808	0.0922377	0.929839	0.99666	-6.23243
High	Master Protein	P68510	14-3-3 protein eta OS=Mus musculus OX=10090 GN=Ywhah PE=1 SV=2	16	117	11	1	NA	0.0594613	27.5445	0.430964	0.683184	0.99666	-6.13317
High	Master Protein	P63011	Ras-related protein Rab-3A OS=Mus musculus OX=10090 GN=Rab3a PE=1 SV=1	11	130	5	1	NA	0.0430384	30.2234	0.258535	0.805576	0.99666	-6.19939
High	Master Protein	Q3UTJ2	Sorbin and SH3 domain-containing protein 2 OS=Mus musculus OX=10090 GN=Sorbs2 PE=1 SV=2	22	126	21	1	Phospho [S382]	-0.0148911	27.017	-0.103674	0.921175	0.99666	-6.23116
High	Master Protein	P08249	Malate dehydrogenase, mitochondrial OS=Mus musculus OX=10090 GN=Mdh2 PE=1 SV=3	18	91	18	1	NA	0.227994	28.4199	1.26774	0.256879	0.99666	-5.43902
High	Master Protein	Q2PFD7	PH and SEC7 domain-containing protein 3 OS=Mus musculus OX=10090 GN=Psd3 PE=1 SV=2	22	116	22	1	NA	0.184211	28.661	1.32201	0.239473	0.99666	-5.37857
High	Master Protein	P50396	Rab GDP dissociation inhibitor alpha OS=Mus musculus OX=10090 GN=Gdi1 PE=1 SV=3	17	98	13	1	NA	0.0739919	27.99	0.497839	0.638239	0.99666	-6.09915
High	Master Protein	P84091	AP-2 complex subunit mu OS=Mus musculus OX=10090 GN=Ap2m1 PE=1 SV=1	20	100	20	1	NA	-0.144697	28.9269	-0.785212	0.465417	0.99666	-5.90492
High	Master Protein	Q60930	Voltage-dependent anion-selective channel protein 2 OS=Mus musculus OX=10090 GN=Vdac2 PE=1 SV=2	14	106	14	1	NA	0.107591	29.5857	0.698322	0.513944	0.99666	-5.97138
High	Master Protein	P12382	ATP-dependent 6-phosphofructokinase, liver type OS=Mus musculus OX=10090 GN=Pfkl PE=1 SV=4	16	108	11	1	NA	-0.0333453	27.1054	-0.226471	0.829173	0.99666	-6.20816
High	Master Protein	P61979	Heterogeneous nuclear ribonucleoprotein K OS=Mus musculus OX=10090 GN=Hnrnpk PE=1 SV=1	16	98	16	1	NA	0.124673	27.5903	0.918816	0.397431	0.99666	-5.79109
High	Master Protein	P20444	Protein kinase C alpha type OS=Mus musculus OX=10090 GN=Prkca PE=1 SV=3	18	115	7	1	NA	0.152549	26.1755	0.881157	0.415777	0.99666	-5.82452
High	Master Protein	Q7TMB8	Cytoplasmic FMR1-interacting protein 1 OS=Mus musculus OX=10090 GN=Cyfip1 PE=1 SV=1	18	91	2	1	NA	0.032473	21.5597	0.191698	0.854991	0.99666	-6.21639
High	Master Protein	Q6ZPJ3	(E3-independent) E2 ubiquitin-conjugating enzyme UBE2O OS=Mus musculus OX=10090 GN=Ube2o PE=1 SV=3	22	84	22	1	NA	-0.188563	26.4916	-1.20653	0.277866	0.99666	-5.50561
High	Master Protein	P06151	L-lactate dehydrogenase A chain OS=Mus musculus OX=10090 GN=Ldha PE=1 SV=3	16	102	15	1	NA	0.0453667	29.443	0.309791	0.768338	0.99666	-6.18303
High	Master Protein	P47708	Rabphilin-3A OS=Mus musculus OX=10090 GN=Rph3a PE=1 SV=2	19	91	18	1	NA	-0.114599	27.7929	-0.748604	0.485452	0.99666	-5.93368
High	Master Protein	Q6PH08	ERC protein 2 OS=Mus musculus OX=10090 GN=Erc2 PE=1 SV=2	22	85	16	1	NA	0.0266596	27.168	0.175178	0.86733	0.99666	-6.21982
High	Master Protein	O55131	Septin-7 OS=Mus musculus OX=10090 GN=Septin7 PE=1 SV=1	20	122	18	1	NA	0.0758453	29.0023	0.547738	0.605779	0.99666	-6.07088
High	Master Protein	Q62095	ATP-dependent RNA helicase DDX3Y OS=Mus musculus OX=10090 GN=Ddx3y PE=1 SV=2	20	99	2	1	NA	0.0884156	21.8873	0.632893	0.552674	0.99666	-6.01715
High	Master Protein	Q8BL66	Early endosome antigen 1 OS=Mus musculus OX=10090 GN=Eea1 PE=1 SV=2	25	87	25	1	NA	-0.0194804	25.8874	-0.141463	0.892639	0.99666	-6.22589
High	Master Protein	P48962	ADP/ATP translocase 1 OS=Mus musculus OX=10090 GN=Slc25a4 PE=1 SV=4	15	98	8	1	NA	0.00347747	29.6489	0.0205069	0.984376	0.99666	-6.23704
High	Master Protein	P62761	Visinin-like protein 1 OS=Mus musculus OX=10090 GN=Vsnl1 PE=1 SV=2	13	103	10	1	NA	-0.0415789	29.4663	-0.264954	0.800878	0.99666	-6.1975
High	Master Protein	P17156	Heat shock-related 70 kDa protein 2 OS=Mus musculus OX=10090 GN=Hspa2 PE=1 SV=2	20	99	7	1	NA	0.111898	24.6072	0.816551	0.448745	0.99666	-5.87944
High	Master Protein	Q60598	Src substrate cortactin OS=Mus musculus OX=10090 GN=Cttn PE=1 SV=2	16	104	16	1	NA	0.0457472	28.3564	0.319126	0.761627	0.99666	-6.17974
High	Master Protein	A2CG49	Kalirin OS=Mus musculus OX=10090 GN=Kalrn PE=1 SV=1	26	73	19	1	NA	0.17577	25.3619	1.14647	0.299916	0.99666	-5.56915
High	Master Protein	Q9R111	Guanine deaminase OS=Mus musculus OX=10090 GN=Gda PE=1 SV=1	16	91	16	1	NA	-0.0369914	28.4284	-0.255217	0.808008	0.99666	-6.20035
High	Master Protein	Q7TMY8	E3 ubiquitin-protein ligase HUWE1 OS=Mus musculus OX=10090 GN=Huwe1 PE=1 SV=5	29	87	29	1	NA	0.0334543	26.3185	0.213769	0.838578	0.99666	-6.21132
High	Master Protein	Q61598	Rab GDP dissociation inhibitor beta OS=Mus musculus OX=10090 GN=Gdi2 PE=1 SV=1	17	91	13	1	NA	-0.17942	27.8243	-1.22186	0.272472	0.99666	-5.4891
High	Master Protein	Q3UHD9	Arf-GAP with GTPase, ANK repeat and PH domain-containing protein 2 OS=Mus musculus OX=10090 GN=Agap2 PE=1 SV=1	22	96	22	1	NA	-0.021041	26.5557	-0.147417	0.888158	0.99666	-6.22491
High	Master Protein	P42932	T-complex protein 1 subunit theta OS=Mus musculus OX=10090 GN=Cct8 PE=1 SV=3	22	77	22	1	NA	0.177542	27.3144	1.21493	0.274899	0.99666	-5.49657
High	Master Protein	P28738	Kinesin heavy chain isoform 5C OS=Mus musculus OX=10090 GN=Kif5c PE=1 SV=3	21	84	12	1	NA	0.0544357	28.4991	0.369667	0.725709	0.99666	-6.16033
High	Master Protein	Q8CGY8	UDP-N-acetylglucosamine--peptide N-acetylglucosaminyltransferase 110 kDa subunit OS=Mus musculus OX=10090 GN=Ogt PE=1 SV=2	20	102	20	1	NA	-0.0224179	26.8398	-0.149425	0.886648	0.99666	-6.22457
High	Master Protein	Q64514	Tripeptidyl-peptidase 2 OS=Mus musculus OX=10090 GN=Tpp2 PE=1 SV=3	24	90	24	1	NA	0.132479	26.8237	0.756419	0.481124	0.99666	-5.92763
High	Master Protein	P62259	14-3-3 protein epsilon OS=Mus musculus OX=10090 GN=Ywhae PE=1 SV=1	17	90	14	1	NA	0.00913049	28.2284	0.0628598	0.952143	0.99666	-6.23503
High	Master Protein	P60879	Synaptosomal-associated protein 25 OS=Mus musculus OX=10090 GN=Snap25 PE=1 SV=1	10	81	10	1	NA	-0.0226739	28.1867	-0.159277	0.879246	0.99666	-6.22284
High	Master Protein	Q60931	Voltage-dependent anion-selective channel protein 3 OS=Mus musculus OX=10090 GN=Vdac3 PE=1 SV=1	13	118	12	1	NA	0.0174609	28.7229	0.123122	0.90647	0.99666	-6.22864
High	Master Protein	P61264	Syntaxin-1B OS=Mus musculus OX=10090 GN=Stx1b PE=1 SV=1	14	95	14	1	NA	0.00309181	28.8822	0.0195577	0.9851	0.99666	-6.23706
High	Master Protein	Q4ACU6	SH3 and multiple ankyrin repeat domains protein 3 OS=Mus musculus OX=10090 GN=Shank3 PE=1 SV=3	27	96	27	1	NA	-0.0411178	26.407	-0.164855	0.875062	0.99666	-6.22182
High	Master Protein	P18760	Cofilin-1 OS=Mus musculus OX=10090 GN=Cfl1 PE=1 SV=3	13	86	12	1	NA	0.00433792	28.8202	0.0275454	0.979015	0.99666	-6.23685
High	Master Protein	P28660	Nck-associated protein 1 OS=Mus musculus OX=10090 GN=Nckap1 PE=1 SV=2	20	93	20	1	NA	0.685944	27.1194	2.89147	0.0312497	0.758713	-3.42529
High	Master Protein	Q7TMK9	Heterogeneous nuclear ribonucleoprotein Q OS=Mus musculus OX=10090 GN=Syncrip PE=1 SV=2	18	95	18	1	NA	0.163894	26.9146	1.18298	0.286339	0.99666	-5.53075
High	Master Protein	P63268	Actin, gamma-enteric smooth muscle OS=Mus musculus OX=10090 GN=Actg2 PE=1 SV=1	11	183	3	1	NA	-1.0876	27.9875	-5.00518	0.00330838	0.460527	-1.21796
High	Master Protein	Q9JIS5	Synaptic vesicle glycoprotein 2A OS=Mus musculus OX=10090 GN=Sv2a PE=1 SV=1	16	86	16	1	NA	0.0129348	28.3992	0.0930877	0.929195	0.99666	-6.23234
High	Master Protein	P05063	Fructose-bisphosphate aldolase C OS=Mus musculus OX=10090 GN=Aldoc PE=1 SV=4	17	80	10	1	NA	-0.10186	26.903	-0.250835	0.811223	0.99666	-6.2016
High	Master Protein	A2AN08	E3 ubiquitin-protein ligase UBR4 OS=Mus musculus OX=10090 GN=Ubr4 PE=1 SV=1	27	67	27	1	NA	0.177096	26.0343	1.22991	0.269676	0.99666	-5.48038
High	Master Protein	Q812A2	SLIT-ROBO Rho GTPase-activating protein 3 OS=Mus musculus OX=10090 GN=Srgap3 PE=1 SV=1	19	88	19	1	NA	0.163375	26.3316	1.15496	0.296711	0.99666	-5.56028
High	Master Protein	P10637	Microtubule-associated protein tau OS=Mus musculus OX=10090 GN=Mapt PE=1 SV=3	16	95	16	1	Phospho [S696]	0.0352068	29.0133	0.237512	0.821023	0.99666	-6.20527
High	Master Protein	Q810U3	Neurofascin OS=Mus musculus OX=10090 GN=Nfasc PE=1 SV=1	21	91	21	1	NA	0.185741	27.787	1.31939	0.240286	0.99666	-5.38151
High	Master Protein	Q62188	Dihydropyrimidinase-related protein 3 OS=Mus musculus OX=10090 GN=Dpysl3 PE=1 SV=1	11	129	7	1	NA	-0.0331829	25.622	-0.231804	0.825233	0.99666	-6.20678
High	Master Protein	P10126	Elongation factor 1-alpha 1 OS=Mus musculus OX=10090 GN=Eef1a1 PE=1 SV=3	16	113	9	1	NA	0.0599004	28.972	0.387241	0.713395	0.99666	-6.15294
High	Master Protein	B1AWN6	Sodium channel protein type 2 subunit alpha OS=Mus musculus OX=10090 GN=Scn2a PE=1 SV=1	22	76	15	1	NA	0.023513	27.0123	0.173833	0.868336	0.99666	-6.22009
High	Master Protein	Q6NZL0	Protein SOGA3 OS=Mus musculus OX=10090 GN=Soga3 PE=1 SV=2	20	84	20	1	NA	0.0517601	29.8419	0.368021	0.726867	0.99666	-6.161
High	Master Protein	P58871	182 kDa tankyrase-1-binding protein OS=Mus musculus OX=10090 GN=Tnks1bp1 PE=1 SV=2	19	64	19	1	Phospho [S692; S1373]	-0.0378534	25.5436	-0.246235	0.814602	0.99666	-6.20289
High	Master Protein	O88569	Heterogeneous nuclear ribonucleoproteins A2/B1 OS=Mus musculus OX=10090 GN=Hnrnpa2b1 PE=1 SV=2	14	87	12	1	NA	0.110651	27.671	0.736524	0.492194	0.99666	-5.94293
High	Master Protein	Q9EPU0	Regulator of nonsense transcripts 1 OS=Mus musculus OX=10090 GN=Upf1 PE=1 SV=2	23	85	23	1	NA	-0.0142722	27.4045	-0.102449	0.922102	0.99666	-6.2313
High	Master Protein	Q80VP0	Tectonin beta-propeller repeat-containing protein 1 OS=Mus musculus OX=10090 GN=Tecpr1 PE=1 SV=1	18	87	18	1	NA	-0.0639733	26.3404	-0.451824	0.668994	0.99666	-6.12304
High	Master Protein	P29341	Polyadenylate-binding protein 1 OS=Mus musculus OX=10090 GN=Pabpc1 PE=1 SV=2	19	86	19	1	NA	0.0372112	27.4456	0.228926	0.827359	0.99666	-6.20753
High	Master Protein	P62874	Guanine nucleotide-binding protein G(I)/G(S)/G(T) subunit beta-1 OS=Mus musculus OX=10090 GN=Gnb1 PE=1 SV=3	9	91	5	1	NA	-0.0445821	28.4115	-0.293524	0.780087	0.99666	-6.18853
High	Master Protein	Q9Z0H8	CAP-Gly domain-containing linker protein 2 OS=Mus musculus OX=10090 GN=Clip2 PE=1 SV=2	21	90	16	1	NA	-0.13987	26.2842	-0.816011	0.449028	0.99666	-5.87988
High	Master Protein	P62631	Elongation factor 1-alpha 2 OS=Mus musculus OX=10090 GN=Eef1a2 PE=1 SV=1	15	100	8	1	NA	0.207401	26.6347	1.36835	0.225468	0.99666	-5.32597
High	Master Protein	P16054	Protein kinase C epsilon type OS=Mus musculus OX=10090 GN=Prkce PE=1 SV=1	20	98	18	1	Phospho [S337]	0.0822546	26.8302	0.535518	0.613639	0.99666	-6.07803
High	Master Protein	P17183	Gamma-enolase OS=Mus musculus OX=10090 GN=Eno2 PE=1 SV=2	13	73	10	1	NA	-0.09161	25.8514	-0.621531	0.559587	0.99666	-6.02471
High	Master Protein	Q6PHZ2	Calcium/calmodulin-dependent protein kinase type II subunit delta OS=Mus musculus OX=10090 GN=Camk2d PE=1 SV=1	14	122	9	1	NA	0.129529	29.0163	0.940064	0.387362	0.99666	-5.77178
High	Master Protein	Q80XI3	Eukaryotic translation initiation factor 4 gamma 3 OS=Mus musculus OX=10090 GN=Eif4g3 PE=1 SV=2	24	86	21	1	NA	-0.0511139	26.5037	-0.350863	0.738987	0.99666	-6.16787
High	Master Protein	P43006	Excitatory amino acid transporter 2 OS=Mus musculus OX=10090 GN=Slc1a2 PE=1 SV=1	9	81	9	1	NA	0.0121164	28.8699	0.0785507	0.940223	0.99666	-6.23376
High	Master Protein	Q99KY4	Cyclin-G-associated kinase OS=Mus musculus OX=10090 GN=Gak PE=1 SV=2	20	83	17	1	NA	0.0592717	25.9352	0.381014	0.717748	0.99666	-6.15559
High	Master Protein	P61205	ADP-ribosylation factor 3 OS=Mus musculus OX=10090 GN=Arf3 PE=2 SV=2	9	81	1	1	NA	0.133625	28.26	0.919573	0.397069	0.99666	-5.79041
High	Master Protein	O55042	Alpha-synuclein OS=Mus musculus OX=10090 GN=Snca PE=1 SV=2	9	72	6	1	NA	0.0222904	30.6424	0.148968	0.886992	0.99666	-6.22465
High	Master Protein	P62880	Guanine nucleotide-binding protein G(I)/G(S)/G(T) subunit beta-2 OS=Mus musculus OX=10090 GN=Gnb2 PE=1 SV=3	9	74	5	1	NA	0.0252038	25.5873	0.146842	0.888591	0.99666	-6.225
High	Master Protein	Q91W50	Cold shock domain-containing protein E1 OS=Mus musculus OX=10090 GN=Csde1 PE=1 SV=1	21	104	21	1	NA	0.0821061	26.8044	0.560661	0.59753	0.99666	-6.06316
High	Master Protein	A2AGT5	Cytoskeleton-associated protein 5 OS=Mus musculus OX=10090 GN=Ckap5 PE=1 SV=1	24	69	24	1	NA	0.0438943	25.7983	0.289481	0.783017	0.99666	-6.18985
High	Master Protein	Q62417	Sorbin and SH3 domain-containing protein 1 OS=Mus musculus OX=10090 GN=Sorbs1 PE=1 SV=2	20	59	19	1	NA	0.044533	25.3013	0.301588	0.774255	0.99666	-6.18584
High	Master Protein	P08752	Guanine nucleotide-binding protein G(i) subunit alpha-2 OS=Mus musculus OX=10090 GN=Gnai2 PE=1 SV=5	13	76	7	1	NA	0.0472545	26.3271	0.324626	0.757684	0.99666	-6.17776
High	Master Protein	P70704	Phospholipid-transporting ATPase IA OS=Mus musculus OX=10090 GN=Atp8a1 PE=1 SV=2	16	79	16	1	NA	0.0163754	26.1468	0.114998	0.912608	0.99666	-6.22975
High	Master Protein	D3YVF0	A-kinase anchor protein 5 OS=Mus musculus OX=10090 GN=Akap5 PE=1 SV=2	11	50	11	1	NA	-0.0814493	26.6961	-0.583966	0.582824	0.99666	-6.04885
High	Master Protein	Q9EPJ9	ADP-ribosylation factor GTPase-activating protein 1 OS=Mus musculus OX=10090 GN=Arfgap1 PE=1 SV=2	15	89	15	1	NA	0.054571	27.4297	0.370036	0.725449	0.99666	-6.16017
High	Master Protein	Q6ZWR6	Nesprin-1 OS=Mus musculus OX=10090 GN=Syne1 PE=1 SV=2	24	52	24	1	NA	0.472393	24.8505	1.68996	0.147555	0.99666	-4.94162
High	Master Protein	P30275	Creatine kinase U-type, mitochondrial OS=Mus musculus OX=10090 GN=Ckmt1 PE=1 SV=1	11	72	11	1	NA	0.0360731	27.869	0.243274	0.81678	0.99666	-6.20371
High	Master Protein	Q8BX70	Vacuolar protein sorting-associated protein 13C OS=Mus musculus OX=10090 GN=Vps13c PE=1 SV=2	24	73	24	1	NA	-0.238898	25.5881	-1.56972	0.173045	0.99666	-5.08868
High	Master Protein	Q80U28	MAP kinase-activating death domain protein OS=Mus musculus OX=10090 GN=Madd PE=1 SV=2	24	74	24	1	Phospho [T1235; S1237]	-0.142321	26.9756	-0.960121	0.378044	0.99666	-5.75327
High	Master Protein	P51881	ADP/ATP translocase 2 OS=Mus musculus OX=10090 GN=Slc25a5 PE=1 SV=3	13	83	6	1	NA	-0.197205	27.7223	-1.33769	0.234648	0.99666	-5.36087
High	Master Protein	B2RSH2	Guanine nucleotide-binding protein G(i) subunit alpha-1 OS=Mus musculus OX=10090 GN=Gnai1 PE=1 SV=1	12	65	6	1	NA	0.0346807	29.0419	0.235302	0.822653	0.99666	-6.20586
High	Master Protein	P43274	Histone H1.4 OS=Mus musculus OX=10090 GN=H1-4 PE=1 SV=2	12	99	5	1	NA	0.0121968	31.59	0.0884373	0.932721	0.99666	-6.23282
High	Master Protein	Q7TQD2	Tubulin polymerization-promoting protein OS=Mus musculus OX=10090 GN=Tppp PE=1 SV=1	14	88	14	1	Phospho [S31; S34]	-0.0618638	29.5304	-0.428474	0.684888	0.99666	-6.13435
High	Master Protein	O88643	Serine/threonine-protein kinase PAK 1 OS=Mus musculus OX=10090 GN=Pak1 PE=1 SV=1	13	73	9	1	Phospho [S220; S223]	0.0471061	27.8377	0.328811	0.754688	0.99666	-6.17623
High	Master Protein	Q8BVE3	V-type proton ATPase subunit H OS=Mus musculus OX=10090 GN=Atp6v1h PE=1 SV=1	16	76	16	1	NA	0.00547916	27.3333	0.0385192	0.97066	0.99666	-6.23643
High	Master Protein	Q8BL65	Actin-binding LIM protein 2 OS=Mus musculus OX=10090 GN=Ablim2 PE=1 SV=1	15	74	13	1	Phospho [S294]	-0.0491816	26.7767	-0.328453	0.754945	0.99666	-6.17636
High	Master Protein	Q80YA9	Connector enhancer of kinase suppressor of ras 2 OS=Mus musculus OX=10090 GN=Cnksr2 PE=1 SV=1	21	83	21	1	NA	-0.0728836	27.2814	-0.480745	0.649574	0.99666	-6.10827
High	Master Protein	O08788	Dynactin subunit 1 OS=Mus musculus OX=10090 GN=Dctn1 PE=1 SV=3	18	75	18	1	NA	-0.0114029	25.5643	-0.0797854	0.939285	0.99666	-6.23365
High	Master Protein	P63038	60 kDa heat shock protein, mitochondrial OS=Mus musculus OX=10090 GN=Hspd1 PE=1 SV=1	15	60	15	1	NA	0.05941	26.0959	0.377325	0.720332	0.99666	-6.15715
High	Master Protein	Q6R891	Neurabin-2 OS=Mus musculus OX=10090 GN=Ppp1r9b PE=1 SV=1	15	73	15	1	NA	0.109395	26.4385	0.579493	0.58563	0.99666	-6.05164
High	Master Protein	Q61792	LIM and SH3 domain protein 1 OS=Mus musculus OX=10090 GN=Lasp1 PE=1 SV=1	16	78	15	1	NA	0.0381933	28.2088	0.270923	0.796519	0.99666	-6.1957
High	Master Protein	P58281	Dynamin-like 120 kDa protein, mitochondrial OS=Mus musculus OX=10090 GN=Opa1 PE=1 SV=1	17	79	17	1	NA	-0.00602374	26.0827	-0.0422195	0.967843	0.99666	-6.23626
High	Master Protein	Q8BGD9	Eukaryotic translation initiation factor 4B OS=Mus musculus OX=10090 GN=Eif4b PE=1 SV=1	13	61	13	1	Phospho [S504]	0.0966559	27.3808	0.627871	0.555723	0.99666	-6.0205
High	Master Protein	Q8BYR5	Calcium-dependent secretion activator 2 OS=Mus musculus OX=10090 GN=Cadps2 PE=1 SV=2	16	70	8	1	NA	0.368227	23.9362	2.08919	0.0869325	0.99666	-4.43741
High	Master Protein	Q60864	Stress-induced-phosphoprotein 1 OS=Mus musculus OX=10090 GN=Stip1 PE=1 SV=1	20	83	20	1	NA	0.308103	27.2007	1.73068	0.13979	0.99666	-4.89113
High	Master Protein	P80317	T-complex protein 1 subunit zeta OS=Mus musculus OX=10090 GN=Cct6a PE=1 SV=3	13	63	13	1	NA	0.289803	25.6593	1.71987	0.141812	0.99666	-4.90457
High	Master Protein	P21279	Guanine nucleotide-binding protein G(q) subunit alpha OS=Mus musculus OX=10090 GN=Gnaq PE=1 SV=4	11	91	6	1	NA	0.0710564	25.863	0.490395	0.643162	0.99666	-6.10316
High	Master Protein	Q80TV8	CLIP-associating protein 1 OS=Mus musculus OX=10090 GN=Clasp1 PE=1 SV=2	18	69	14	1	NA	0.028116	26.5308	0.199482	0.849192	0.99666	-6.21466
High	Master Protein	O88447	Kinesin light chain 1 OS=Mus musculus OX=10090 GN=Klc1 PE=1 SV=3	14	75	11	1	NA	-0.0724577	25.9682	-0.450164	0.670118	0.99666	-6.12386
High	Master Protein	P14824	Annexin A6 OS=Mus musculus OX=10090 GN=Anxa6 PE=1 SV=3	17	77	16	1	NA	-0.0209537	26.5694	-0.146839	0.888593	0.99666	-6.225
High	Master Protein	O70589	Peripheral plasma membrane protein CASK OS=Mus musculus OX=10090 GN=Cask PE=1 SV=2	16	77	16	1	NA	0.0571207	27.2507	0.371937	0.724113	0.99666	-6.15939
High	Master Protein	P40124	Adenylyl cyclase-associated protein 1 OS=Mus musculus OX=10090 GN=Cap1 PE=1 SV=4	15	71	14	1	NA	0.0149212	27.3161	0.106755	0.918843	0.99666	-6.23079
High	Master Protein	P26443	Glutamate dehydrogenase 1, mitochondrial OS=Mus musculus OX=10090 GN=Glud1 PE=1 SV=1	14	69	14	1	NA	0.532774	26.6932	1.64957	0.15568	0.99666	-4.99139
High	Master Protein	Q6PB44	Tyrosine-protein phosphatase non-receptor type 23 OS=Mus musculus OX=10090 GN=Ptpn23 PE=1 SV=2	18	70	18	1	NA	0.0129409	25.8443	0.0878354	0.933177	0.99666	-6.23288
High	Master Protein	Q91YM2	Rho GTPase-activating protein 35 OS=Mus musculus OX=10090 GN=Arhgap35 PE=1 SV=3	18	71	18	1	NA	0.0456969	25.6069	0.32359	0.758426	0.99666	-6.17814
High	Master Protein	O08539	Myc box-dependent-interacting protein 1 OS=Mus musculus OX=10090 GN=Bin1 PE=1 SV=1	16	71	14	1	NA	0.105855	26.8157	0.724007	0.49925	0.99666	-5.95239
High	Master Protein	Q62420	Endophilin-A1 OS=Mus musculus OX=10090 GN=Sh3gl2 PE=1 SV=2	12	74	8	1	NA	0.12053	27.9707	0.897254	0.407857	0.99666	-5.81036
High	Master Protein	P51863	V-type proton ATPase subunit d 1 OS=Mus musculus OX=10090 GN=Atp6v0d1 PE=1 SV=2	14	85	14	1	NA	0.0135352	27.2943	0.0857467	0.934762	0.99666	-6.23309
High	Master Protein	P62715	Serine/threonine-protein phosphatase 2A catalytic subunit beta isoform OS=Mus musculus OX=10090 GN=Ppp2cb PE=1 SV=1	12	79	2	1	NA	-0.063844	28.0404	-0.43929	0.677503	0.99666	-6.12918
High	Master Protein	Q9EQH3	Vacuolar protein sorting-associated protein 35 OS=Mus musculus OX=10090 GN=Vps35 PE=1 SV=1	15	75	15	1	NA	0.121979	26.3552	0.806608	0.453986	0.99666	-5.88761
High	Master Protein	Q9Z0P4	Paralemmin-1 OS=Mus musculus OX=10090 GN=Palm PE=1 SV=1	16	70	15	1	Phospho [T145]	-0.0466331	27.9311	-0.338514	0.747763	0.99666	-6.17261
High	Master Protein	Q62277	Synaptophysin OS=Mus musculus OX=10090 GN=Syp PE=1 SV=2	8	132	8	1	Phospho [Y81]	-0.00410443	32.1535	-0.0249477	0.980994	0.99666	-6.23693
High	Master Protein	Q62418	Drebrin-like protein OS=Mus musculus OX=10090 GN=Dbnl PE=1 SV=2	11	66	11	1	NA	-0.157982	26.8701	-1.12095	0.309735	0.99666	-5.59557
High	Master Protein	Q01097	Glutamate receptor ionotropic, NMDA 2B OS=Mus musculus OX=10090 GN=Grin2b PE=1 SV=3	17	100	16	1	NA	-0.146288	26.3487	-0.932077	0.391123	0.99666	-5.77908
High	Master Protein	Q99LI8	Hepatocyte growth factor-regulated tyrosine kinase substrate OS=Mus musculus OX=10090 GN=Hgs PE=1 SV=2	19	89	19	1	NA	-0.0173633	27.9519	-0.119001	0.909583	0.99666	-6.22921
High	Master Protein	Q3UH66	Serine/threonine-protein kinase WNK2 OS=Mus musculus OX=10090 GN=Wnk2 PE=1 SV=2	23	73	19	1	Phospho [S1770]	0.0491023	25.89	0.339227	0.747255	0.99666	-6.17234
High	Master Protein	Q9JM52	Misshapen-like kinase 1 OS=Mus musculus OX=10090 GN=Mink1 PE=1 SV=3	17	67	11	1	NA	0.0370016	26.8755	0.257159	0.806584	0.99666	-6.19979
High	Master Protein	Q8BG39	Synaptic vesicle glycoprotein 2B OS=Mus musculus OX=10090 GN=Sv2b PE=1 SV=1	11	78	10	1	NA	0.0447181	29.1446	0.316798	0.763298	0.99666	-6.18057
High	Master Protein	P63330	Serine/threonine-protein phosphatase 2A catalytic subunit alpha isoform OS=Mus musculus OX=10090 GN=Ppp2ca PE=1 SV=1	11	75	1	1	NA	-0.161055	25.0662	-1.11887	0.310546	0.99666	-5.5977
High	Master Protein	Q02357	Ankyrin-1 OS=Mus musculus OX=10090 GN=Ank1 PE=1 SV=2	19	50	15	1	NA	-0.0761016	24.3724	-0.47428	0.65389	0.99666	-6.11165
High	Master Protein	Q9JKY5	Huntingtin-interacting protein 1-related protein OS=Mus musculus OX=10090 GN=Hip1r PE=1 SV=2	16	71	16	1	NA	0.085371	25.884	0.555291	0.60095	0.99666	-6.06639
High	Master Protein	Q8BIZ1	Ankyrin repeat and sterile alpha motif domain-containing protein 1B OS=Mus musculus OX=10090 GN=Anks1b PE=1 SV=3	13	80	13	1	NA	0.0549336	27.2661	0.371113	0.724692	0.99666	-6.15973
High	Master Protein	Q9EPW0	Inositol polyphosphate-4-phosphatase type I A OS=Mus musculus OX=10090 GN=Inpp4a PE=1 SV=1	20	69	20	1	NA	0.0616973	26.5875	0.432254	0.682302	0.99666	-6.13256
High	Master Protein	P31324	cAMP-dependent protein kinase type II-beta regulatory subunit OS=Mus musculus OX=10090 GN=Prkar2b PE=1 SV=3	15	62	13	1	NA	0.0417167	26.8349	0.263747	0.801761	0.99666	-6.19786
High	Master Protein	Q8BH66	Atlastin-1 OS=Mus musculus OX=10090 GN=Atl1 PE=1 SV=1	16	61	15	1	NA	-0.220465	26.0236	-1.47781	0.195353	0.99666	-5.19859
High	Master Protein	Q3UGY8	Brefeldin A-inhibited guanine nucleotide-exchange protein 3 OS=Mus musculus OX=10090 GN=Arfgef3 PE=1 SV=1	18	54	18	1	NA	-0.0928581	25.1919	-0.440092	0.676957	0.99666	-6.12879
High	Master Protein	P62821	Ras-related protein Rab-1A OS=Mus musculus OX=10090 GN=Rab1A PE=1 SV=3	12	75	6	1	NA	-0.0768699	29.3272	-0.529813	0.617329	0.99666	-6.08131
High	Master Protein	Q99KJ8	Dynactin subunit 2 OS=Mus musculus OX=10090 GN=Dctn2 PE=1 SV=3	16	81	15	1	NA	0.0170408	26.7772	0.117136	0.910992	0.99666	-6.22946
High	Master Protein	Q7TT50	Serine/threonine-protein kinase MRCK beta OS=Mus musculus OX=10090 GN=Cdc42bpb PE=1 SV=2	15	75	12	1	NA	-0.10509	25.4504	-0.620921	0.55996	0.99666	-6.02511
High	Master Protein	O35526	Syntaxin-1A OS=Mus musculus OX=10090 GN=Stx1a PE=1 SV=3	9	56	9	1	NA	0.133973	27.8074	0.881145	0.415782	0.99666	-5.82453
High	Master Protein	Q8BUV3	Gephyrin OS=Mus musculus OX=10090 GN=Gphn PE=1 SV=2	15	69	15	1	NA	0.111426	26.0558	0.784523	0.465788	0.99666	-5.90547
High	Master Protein	Q61656	Probable ATP-dependent RNA helicase DDX5 OS=Mus musculus OX=10090 GN=Ddx5 PE=1 SV=2	16	61	11	1	NA	0.109532	26.5229	0.762373	0.477845	0.99666	-5.92299
High	Master Protein	Q60902	Epidermal growth factor receptor substrate 15-like 1 OS=Mus musculus OX=10090 GN=Eps15l1 PE=1 SV=3	16	63	16	1	Phospho [S229]	0.207382	26.1112	1.28897	0.249936	0.99666	-5.41552
High	Master Protein	Q7TQI3	Ubiquitin thioesterase OTUB1 OS=Mus musculus OX=10090 GN=Otub1 PE=1 SV=2	9	57	9	1	NA	0.0602657	27.7451	0.424538	0.687585	0.99666	-6.1362
High	Master Protein	P08414	Calcium/calmodulin-dependent protein kinase type IV OS=Mus musculus OX=10090 GN=Camk4 PE=1 SV=2	12	80	12	1	NA	0.00365835	26.7985	0.0254459	0.980615	0.99666	-6.23691
High	Master Protein	Q8VHJ5	Serine/threonine-protein kinase MARK1 OS=Mus musculus OX=10090 GN=Mark1 PE=1 SV=2	15	63	8	1	NA	-0.433282	26.6275	-2.4806	0.0522691	0.899207	-3.93774
High	Master Protein	P09411	Phosphoglycerate kinase 1 OS=Mus musculus OX=10090 GN=Pgk1 PE=1 SV=4	15	66	15	1	NA	0.00405119	27.1368	0.0275198	0.979035	0.99666	-6.23685
High	Master Protein	Q9Z1G3	V-type proton ATPase subunit C 1 OS=Mus musculus OX=10090 GN=Atp6v1c1 PE=1 SV=4	15	68	15	1	NA	0.12565	27.4891	0.862276	0.425216	0.99666	-5.8409
High	Master Protein	Q60875	Rho guanine nucleotide exchange factor 2 OS=Mus musculus OX=10090 GN=Arhgef2 PE=1 SV=4	18	68	18	1	NA	0.00308667	25.938	0.0188662	0.985626	0.99666	-6.23708
High	Master Protein	P11983	T-complex protein 1 subunit alpha OS=Mus musculus OX=10090 GN=Tcp1 PE=1 SV=3	16	63	16	1	NA	-0.0131737	25.9288	-0.0894764	0.931933	0.99666	-6.23272
High	Master Protein	P60202	Myelin proteolipid protein OS=Mus musculus OX=10090 GN=Plp1 PE=1 SV=2	8	110	8	1	NA	0.0178119	31.9807	0.120535	0.908424	0.99666	-6.229
High	Master Protein	Q80TL4	PHD finger protein 24 OS=Mus musculus OX=10090 GN=Phf24 PE=1 SV=2	12	78	12	1	NA	0.0969031	28.1869	0.642059	0.547138	0.99666	-6.01097
High	Master Protein	Q91ZZ3	Beta-synuclein OS=Mus musculus OX=10090 GN=Sncb PE=1 SV=1	7	57	4	1	NA	0.0241784	29.1259	0.153571	0.883532	0.99666	-6.22386
High	Master Protein	Q9R1T4	Septin-6 OS=Mus musculus OX=10090 GN=Septin6 PE=1 SV=4	14	61	9	1	NA	0.157349	27.0042	0.976853	0.370408	0.99666	-5.73763
High	Master Protein	P08113	Endoplasmin OS=Mus musculus OX=10090 GN=Hsp90b1 PE=1 SV=2	15	80	14	1	NA	-0.506437	26.5645	-1.25674	0.260544	0.99666	-5.45112
High	Master Protein	P20029	Endoplasmic reticulum chaperone BiP OS=Mus musculus OX=10090 GN=Hspa5 PE=1 SV=3	14	59	11	1	NA	-0.29524	24.8458	-1.17236	0.290231	0.99666	-5.54198
High	Master Protein	Q9Z2Q6	Septin-5 OS=Mus musculus OX=10090 GN=Septin5 PE=1 SV=2	11	66	10	1	NA	0.000556218	27.9433	0.00399985	0.996952	0.998866	-6.23727
High	Master Protein	P97797	Tyrosine-protein phosphatase non-receptor type substrate 1 OS=Mus musculus OX=10090 GN=Sirpa PE=1 SV=2	13	59	13	1	NA	0.0631234	28.2117	0.446529	0.672582	0.99666	-6.12566
High	Master Protein	P60335	Poly(rC)-binding protein 1 OS=Mus musculus OX=10090 GN=Pcbp1 PE=1 SV=1	9	68	6	1	NA	0.00261766	27.368	0.0177865	0.986449	0.99666	-6.2371
High	Master Protein	P14152	Malate dehydrogenase, cytoplasmic OS=Mus musculus OX=10090 GN=Mdh1 PE=1 SV=3	10	59	10	1	NA	-0.0994771	28.4114	-0.708029	0.508356	0.99666	-5.96427
High	Master Protein	P48453	Serine/threonine-protein phosphatase 2B catalytic subunit beta isoform OS=Mus musculus OX=10090 GN=Ppp3cb PE=1 SV=2	11	62	5	1	NA	-0.0565325	25.8264	-0.336755	0.749017	0.99666	-6.17328
High	Master Protein	Q9CX34	Protein SGT1 homolog OS=Mus musculus OX=10090 GN=Sugt1 PE=1 SV=3	13	62	13	1	NA	-0.0810013	26.1458	-0.540806	0.61023	0.99666	-6.07495
High	Master Protein	Q8C1B7	Septin-11 OS=Mus musculus OX=10090 GN=Septin11 PE=1 SV=4	12	52	6	1	NA	-0.386671	24.3091	-1.98747	0.0994267	0.99666	-4.56727
High	Master Protein	Q9WVK8	Cholesterol 24-hydroxylase OS=Mus musculus OX=10090 GN=Cyp46a1 PE=1 SV=1	11	72	11	1	NA	0.0782479	26.132	0.487296	0.645218	0.99666	-6.10481
High	Master Protein	O88990	Alpha-actinin-3 OS=Mus musculus OX=10090 GN=Actn3 PE=2 SV=1	10	72	1	1	Phospho [S676]	1.20143	18.1126	4.17556	0.00737949	0.641422	-1.99076
High	Master Protein	A2AQ25	Sickle tail protein OS=Mus musculus OX=10090 GN=Skt PE=1 SV=1	19	68	19	1	NA	0.049711	26.0994	0.338067	0.748082	0.99666	-6.17278
High	Master Protein	O08529	Calpain-2 catalytic subunit OS=Mus musculus OX=10090 GN=Capn2 PE=1 SV=4	12	52	12	1	NA	0.00456672	25.8569	0.0298888	0.977231	0.99666	-6.23677
High	Master Protein	Q9R1V6	Disintegrin and metalloproteinase domain-containing protein 22 OS=Mus musculus OX=10090 GN=Adam22 PE=1 SV=2	13	74	13	1	NA	0.0332931	26.6039	0.24731	0.813812	0.99666	-6.20259
High	Master Protein	Q6NS60	F-box only protein 41 OS=Mus musculus OX=10090 GN=Fbxo41 PE=1 SV=3	13	54	13	1	NA	-0.423814	26.5799	-2.90301	0.0308118	0.758713	-3.41119
High	Master Protein	A2ALS5	Rap1 GTPase-activating protein 1 OS=Mus musculus OX=10090 GN=Rap1gap PE=1 SV=2	12	53	11	1	NA	-0.139813	26.3065	-0.908577	0.402355	0.99666	-5.80028
High	Master Protein	Q9ESN9	C-Jun-amino-terminal kinase-interacting protein 3 OS=Mus musculus OX=10090 GN=Mapk8ip3 PE=1 SV=1	16	56	13	1	Phospho [S584; S586]	-0.0740752	25.678	-0.507976	0.631568	0.99666	-6.09361
High	Master Protein	Q99JY9	Actin-related protein 3 OS=Mus musculus OX=10090 GN=Actr3 PE=1 SV=3	14	52	12	1	NA	-0.0130964	26.4169	-0.0886633	0.932549	0.99666	-6.2328
High	Master Protein	O35098	Dihydropyrimidinase-related protein 4 OS=Mus musculus OX=10090 GN=Dpysl4 PE=1 SV=1	9	75	8	1	NA	0.114865	26.7626	0.748735	0.485379	0.99666	-5.93358
High	Master Protein	Q9DBJ1	Phosphoglycerate mutase 1 OS=Mus musculus OX=10090 GN=Pgam1 PE=1 SV=3	11	55	11	1	NA	-0.0913857	26.6272	-0.613611	0.564437	0.99666	-6.02991
High	Master Protein	P42669	Transcriptional activator protein Pur-alpha OS=Mus musculus OX=10090 GN=Pura PE=1 SV=1	9	62	9	1	NA	-0.0130021	27.1647	-0.0812497	0.938174	0.99666	-6.23352
High	Master Protein	Q9CYT6	Adenylyl cyclase-associated protein 2 OS=Mus musculus OX=10090 GN=Cap2 PE=1 SV=1	14	56	13	1	NA	-0.103167	26.5082	-0.681038	0.523995	0.99666	-5.98384
High	Master Protein	Q9R0P5	Destrin OS=Mus musculus OX=10090 GN=Dstn PE=1 SV=3	11	64	10	1	NA	0.0245324	27.0451	0.128785	0.902195	0.99666	-6.22783
High	Master Protein	Q8CGC7	Bifunctional glutamate/proline--tRNA ligase OS=Mus musculus OX=10090 GN=Eprs PE=1 SV=4	13	58	13	1	NA	0.320704	25.4281	2.31953	0.0643227	0.953014	-4.14276
High	Master Protein	Q8CGF6	WD repeat-containing protein 47 OS=Mus musculus OX=10090 GN=Wdr47 PE=1 SV=2	16	60	16	1	NA	0.0110324	26.3577	0.0660679	0.949704	0.99666	-6.23479
High	Master Protein	Q6A0A9	Constitutive coactivator of PPAR-gamma-like protein 1 OS=Mus musculus OX=10090 GN=FAM120A PE=1 SV=2	16	60	15	1	NA	-0.132107	25.6251	-0.779069	0.468737	0.99666	-5.90982
High	Master Protein	Q68FF6	ARF GTPase-activating protein GIT1 OS=Mus musculus OX=10090 GN=Git1 PE=1 SV=1	15	68	15	1	NA	0.0157465	26.6565	0.0809037	0.938437	0.99666	-6.23355
High	Master Protein	Q8QZY1	Eukaryotic translation initiation factor 3 subunit L OS=Mus musculus OX=10090 GN=Eif3l PE=1 SV=1	16	61	16	1	NA	0.0413534	27.5693	0.284837	0.786388	0.99666	-6.19135
High	Master Protein	Q99NE5	Regulating synaptic membrane exocytosis protein 1 OS=Mus musculus OX=10090 GN=Rims1 PE=1 SV=2	17	58	16	1	NA	0.126176	26.2235	0.815127	0.449493	0.99666	-5.88061
High	Master Protein	P84084	ADP-ribosylation factor 5 OS=Mus musculus OX=10090 GN=Arf5 PE=1 SV=2	7	76	2	1	NA	0.0904947	25.3921	0.573289	0.589534	0.99666	-6.05547
High	Master Protein	Q8QZT1	Acetyl-CoA acetyltransferase, mitochondrial OS=Mus musculus OX=10090 GN=Acat1 PE=1 SV=1	10	52	10	1	NA	0.0697417	25.5305	0.459998	0.663476	0.99666	-6.11895
High	Master Protein	P49025	Citron Rho-interacting kinase OS=Mus musculus OX=10090 GN=Cit PE=1 SV=3	19	56	19	1	NA	0.00528066	26.2171	0.0368021	0.971967	0.99666	-6.23651
High	Master Protein	Q8R570	Synaptosomal-associated protein 47 OS=Mus musculus OX=10090 GN=Snap47 PE=1 SV=1	11	62	11	1	NA	0.114651	25.5271	0.742798	0.488685	0.99666	-5.93815
High	Master Protein	P12960	Contactin-1 OS=Mus musculus OX=10090 GN=Cntn1 PE=1 SV=1	16	44	16	1	NA	-0.222334	25.9669	-1.57849	0.17105	0.99666	-5.07807
High	Master Protein	O70443	Guanine nucleotide-binding protein G(z) subunit alpha OS=Mus musculus OX=10090 GN=Gnaz PE=1 SV=4	13	71	12	1	NA	0.0495815	26.6758	0.331957	0.75244	0.99666	-6.17507
High	Master Protein	O88342	WD repeat-containing protein 1 OS=Mus musculus OX=10090 GN=Wdr1 PE=1 SV=3	14	68	14	1	NA	-0.0515001	26.3616	-0.305141	0.77169	0.99666	-6.18463
High	Master Protein	Q6PHN9	Ras-related protein Rab-35 OS=Mus musculus OX=10090 GN=Rab35 PE=1 SV=1	9	57	7	1	NA	0.102437	24.9657	0.554392	0.601523	0.99666	-6.06693
High	Master Protein	Q8BYI9	Tenascin-R OS=Mus musculus OX=10090 GN=Tnr PE=1 SV=2	13	42	13	1	NA	-0.142748	25.1273	-0.819705	0.447091	0.99666	-5.87683
High	Master Protein	Q6NZJ6	Eukaryotic translation initiation factor 4 gamma 1 OS=Mus musculus OX=10090 GN=Eif4g1 PE=1 SV=1	17	49	14	1	NA	-0.0292661	25.8215	-0.217906	0.835511	0.99666	-6.21031
High	Master Protein	Q6A065	Centrosomal protein of 170 kDa OS=Mus musculus OX=10090 GN=Cep170 PE=1 SV=2	18	63	15	1	NA	0.0392729	25.0179	0.255852	0.807542	0.99666	-6.20017
High	Master Protein	P62141	Serine/threonine-protein phosphatase PP1-beta catalytic subunit OS=Mus musculus OX=10090 GN=Ppp1cb PE=1 SV=3	13	66	4	1	NA	0.00593685	26.7834	0.0388616	0.970399	0.99666	-6.23642
High	Master Protein	O70133	ATP-dependent RNA helicase A OS=Mus musculus OX=10090 GN=Dhx9 PE=1 SV=2	18	69	18	1	NA	0.0405993	25.5658	0.280823	0.789306	0.99666	-6.19263
High	Master Protein	Q9D394	Protein RUFY3 OS=Mus musculus OX=10090 GN=Rufy3 PE=1 SV=1	11	64	11	1	NA	0.0247366	26.9998	0.173189	0.868819	0.99666	-6.22022
High	Master Protein	Q9WV69	Dematin OS=Mus musculus OX=10090 GN=Dmtn PE=1 SV=1	14	75	12	1	Phospho [S226]	-0.0754635	27.1276	-0.472057	0.655377	0.99666	-6.1128
High	Master Protein	Q9DB77	Cytochrome b-c1 complex subunit 2, mitochondrial OS=Mus musculus OX=10090 GN=Uqcrc2 PE=1 SV=1	11	47	11	1	NA	-0.230592	26.0069	-1.58055	0.170585	0.99666	-5.07558
High	Master Protein	Q8K4G5	Actin-binding LIM protein 1 OS=Mus musculus OX=10090 GN=Ablim1 PE=1 SV=1	15	62	13	1	Phospho [T477]	0.0832615	26.9733	0.541794	0.609595	0.99666	-6.07437
High	Master Protein	Q07076	Annexin A7 OS=Mus musculus OX=10090 GN=Anxa7 PE=1 SV=2	12	69	12	1	NA	-0.00466151	27.9336	-0.0312337	0.976207	0.99666	-6.23672
High	Master Protein	P35436	Glutamate receptor ionotropic, NMDA 2A OS=Mus musculus OX=10090 GN=Grin2a PE=1 SV=2	14	62	13	1	NA	-0.0401754	25.2161	-0.257981	0.805982	0.99666	-6.19955
High	Master Protein	P06837	Neuromodulin OS=Mus musculus OX=10090 GN=Gap43 PE=1 SV=1	11	59	11	1	Phospho [S96; S103; T166; T172]	-0.180379	26.2523	-1.19119	0.283359	0.99666	-5.52201
High	Master Protein	Q6ZQ18	Protein EFR3 homolog B OS=Mus musculus OX=10090 GN=Efr3b PE=1 SV=2	13	56	13	1	NA	0.0839538	25.4037	0.45849	0.664492	0.99666	-6.11971
High	Master Protein	Q9EPL8	Importin-7 OS=Mus musculus OX=10090 GN=Ipo7 PE=1 SV=2	11	58	11	1	NA	0.178075	25.2605	1.02768	0.347975	0.99666	-5.68897
High	Master Protein	Q8CJ19	[F-actin]-monooxygenase MICAL3 OS=Mus musculus OX=10090 GN=Mical3 PE=1 SV=2	18	56	18	1	NA	0.200946	25.3317	1.01998	0.351302	0.99666	-5.69645
High	Master Protein	O35295	Transcriptional activator protein Pur-beta OS=Mus musculus OX=10090 GN=Purb PE=1 SV=3	8	38	8	1	NA	0.0592598	25.2496	0.432688	0.682006	0.99666	-6.13235
High	Master Protein	Q80X50	Ubiquitin-associated protein 2-like OS=Mus musculus OX=10090 GN=Ubap2l PE=1 SV=1	13	59	13	1	NA	-0.0545551	25.9339	-0.38659	0.713849	0.99666	-6.15322
High	Master Protein	Q61696	Heat shock 70 kDa protein 1A OS=Mus musculus OX=10090 GN=Hspa1a PE=1 SV=2	11	56	5	1	NA	0.0294008	23.3114	0.168261	0.872509	0.99666	-6.22117
High	Master Protein	Q91VD9	NADH-ubiquinone oxidoreductase 75 kDa subunit, mitochondrial OS=Mus musculus OX=10090 GN=Ndufs1 PE=1 SV=2	14	54	14	1	NA	0.0256098	25.2901	0.188839	0.857123	0.99666	-6.21701
High	Master Protein	P15864	Histone H1.2 OS=Mus musculus OX=10090 GN=H1-2 PE=1 SV=2	9	89	5	1	NA	0.0269708	28.1918	0.189358	0.856736	0.99666	-6.21689
High	Master Protein	A2RT62	F-box/LRR-repeat protein 16 OS=Mus musculus OX=10090 GN=Fbxl16 PE=1 SV=1	12	50	12	1	NA	0.253127	26.4877	1.08573	0.323735	0.99666	-5.63143
High	Master Protein	P28663	Beta-soluble NSF attachment protein OS=Mus musculus OX=10090 GN=Napb PE=1 SV=2	14	49	10	1	NA	-0.028478	26.4396	-0.189657	0.856513	0.99666	-6.21683
High	Master Protein	O54829	Regulator of G-protein signaling 7 OS=Mus musculus OX=10090 GN=Rgs7 PE=1 SV=2	8	52	6	1	NA	0.100717	26.1062	0.676061	0.526914	0.99666	-5.98738
High	Master Protein	Q9D6R2	Isocitrate dehydrogenase [NAD] subunit alpha, mitochondrial OS=Mus musculus OX=10090 GN=Idh3a PE=1 SV=1	10	68	10	1	NA	-0.0118234	26.9623	-0.0829144	0.936911	0.99666	-6.23336
High	Master Protein	Q91V12	Cytosolic acyl coenzyme A thioester hydrolase OS=Mus musculus OX=10090 GN=Acot7 PE=1 SV=2	9	60	9	1	NA	-0.0569509	26.7988	-0.371926	0.724121	0.99666	-6.15939
High	Master Protein	Q8CIQ7	Dedicator of cytokinesis protein 3 OS=Mus musculus OX=10090 GN=Dock3 PE=1 SV=1	14	54	14	1	NA	0.107403	25.409	0.672822	0.528818	0.99666	-5.98967
High	Master Protein	P15105	Glutamine synthetase OS=Mus musculus OX=10090 GN=Glul PE=1 SV=6	11	69	11	1	NA	-0.141491	27.4596	-1.04322	0.341341	0.99666	-5.67376
High	Master Protein	P99029	Peroxiredoxin-5, mitochondrial OS=Mus musculus OX=10090 GN=Prdx5 PE=1 SV=2	10	47	10	1	NA	0.0343662	26.6352	0.244844	0.815625	0.99666	-6.20327
High	Master Protein	Q8C7M3	E3 ubiquitin-protein ligase TRIM9 OS=Mus musculus OX=10090 GN=Trim9 PE=1 SV=2	13	45	13	1	NA	-0.0916872	25.9853	-0.623344	0.558481	0.99666	-6.02351
High	Master Protein	Q3UVX5	Metabotropic glutamate receptor 5 OS=Mus musculus OX=10090 GN=Grm5 PE=1 SV=2	15	57	15	1	NA	0.335927	27.115	2.50852	0.0504381	0.899207	-3.90238
High	Master Protein	Q9Z2W9	Glutamate receptor 3 OS=Mus musculus OX=10090 GN=Gria3 PE=1 SV=2	13	58	11	1	NA	0.108958	25.224	0.784238	0.465942	0.99666	-5.9057
High	Master Protein	Q9QUI0	Transforming protein RhoA OS=Mus musculus OX=10090 GN=Rhoa PE=1 SV=1	9	53	7	1	NA	-0.0720924	26.4802	-0.499889	0.636886	0.99666	-6.09804
High	Master Protein	Q8VEK3	Heterogeneous nuclear ribonucleoprotein U OS=Mus musculus OX=10090 GN=Hnrnpu PE=1 SV=1	15	58	15	1	NA	-0.0171705	26.8365	-0.111935	0.914924	0.99666	-6.23014
High	Master Protein	Q9D1G1	Ras-related protein Rab-1B OS=Mus musculus OX=10090 GN=Rab1b PE=1 SV=1	11	65	5	1	NA	-0.072047	24.8224	-0.270321	0.796958	0.99666	-6.19588
High	Master Protein	Q8VEM8	Phosphate carrier protein, mitochondrial OS=Mus musculus OX=10090 GN=Slc25a3 PE=1 SV=1	10	63	10	1	NA	0.0316265	27.7877	0.230222	0.826402	0.99666	-6.2072
High	Master Protein	P12367	cAMP-dependent protein kinase type II-alpha regulatory subunit OS=Mus musculus OX=10090 GN=Prkar2a PE=1 SV=2	10	53	8	1	NA	-0.0326612	25.171	-0.219349	0.834442	0.99666	-6.20996
High	Master Protein	P40142	Transketolase OS=Mus musculus OX=10090 GN=Tkt PE=1 SV=1	10	58	10	1	NA	0.0375379	26.0711	0.265176	0.800716	0.99666	-6.19743
High	Master Protein	Q5SSM3	Rho GTPase-activating protein 44 OS=Mus musculus OX=10090 GN=Arhgap44 PE=1 SV=1	13	48	12	1	NA	0.302739	26.0507	1.64795	0.156014	0.99666	-4.99337
High	Master Protein	P21278	Guanine nucleotide-binding protein subunit alpha-11 OS=Mus musculus OX=10090 GN=Gna11 PE=1 SV=1	12	58	7	1	NA	0.419167	26.5335	1.80518	0.126618	0.99666	-4.79802
High	Master Protein	Q5DTL9	Sodium-driven chloride bicarbonate exchanger OS=Mus musculus OX=10090 GN=Slc4a10 PE=1 SV=2	12	48	8	1	NA	0.0332466	25.718	0.0926247	0.929546	0.99666	-6.23239
High	Master Protein	P63085	Mitogen-activated protein kinase 1 OS=Mus musculus OX=10090 GN=Mapk1 PE=1 SV=3	13	58	9	1	NA	0.166688	27.225	1.15942	0.295039	0.99666	-5.55561
High	Master Protein	Q8BGZ1	Hippocalcin-like protein 4 OS=Mus musculus OX=10090 GN=Hpcal4 PE=1 SV=3	10	47	7	1	NA	0.0757367	25.7683	0.415316	0.693925	0.99666	-6.14047
High	Master Protein	Q8R5H1	Ubiquitin carboxyl-terminal hydrolase 15 OS=Mus musculus OX=10090 GN=Usp15 PE=1 SV=1	15	52	14	1	NA	-0.141268	27.005	-0.64441	0.545723	0.99666	-6.00937
High	Master Protein	A2AG50	MAP7 domain-containing protein 2 OS=Mus musculus OX=10090 GN=Map7d2 PE=1 SV=1	16	53	15	1	NA	1.17725	27.8366	1.63483	0.158751	0.99666	-5.00945
High	Master Protein	Q61990	Poly(rC)-binding protein 2 OS=Mus musculus OX=10090 GN=Pcbp2 PE=1 SV=1	8	55	4	1	NA	0.303526	25.7188	1.69251	0.147057	0.99666	-4.93847
High	Master Protein	P63087	Serine/threonine-protein phosphatase PP1-gamma catalytic subunit OS=Mus musculus OX=10090 GN=Ppp1cc PE=1 SV=1	11	62	2	1	NA	0.0552057	23.309	0.257374	0.806426	0.99666	-6.19973
High	Master Protein	Q9QWY8	Arf-GAP with SH3 domain, ANK repeat and PH domain-containing protein 1 OS=Mus musculus OX=10090 GN=Asap1 PE=1 SV=2	12	67	11	1	NA	0.0118766	26.0195	0.0845289	0.935686	0.99666	-6.23321
High	Master Protein	P14094	Sodium/potassium-transporting ATPase subunit beta-1 OS=Mus musculus OX=10090 GN=Atp1b1 PE=1 SV=1	7	63	7	1	NA	-0.061163	28.5253	-0.40916	0.698172	0.99666	-6.14328
High	Master Protein	Q9DBR7	Protein phosphatase 1 regulatory subunit 12A OS=Mus musculus OX=10090 GN=Ppp1r12a PE=1 SV=2	14	47	13	1	NA	0.100016	25.3336	0.68216	0.523339	0.99666	-5.98303
High	Master Protein	P27612	Phospholipase A-2-activating protein OS=Mus musculus OX=10090 GN=Plaa PE=1 SV=4	13	41	13	1	NA	-0.0461048	24.9453	-0.305004	0.771789	0.99666	-6.18468
High	Master Protein	Q64521	Glycerol-3-phosphate dehydrogenase, mitochondrial OS=Mus musculus OX=10090 GN=Gpd2 PE=1 SV=2	13	57	13	1	NA	0.330371	25.7589	2.38273	0.0592726	0.940245	-4.06214
High	Master Protein	Q80TK0	AP2-interacting clathrin-endocytosis protein OS=Mus musculus OX=10090 GN=Kiaa1107 PE=1 SV=6	14	45	14	1	NA	-0.205461	25.7156	-1.36169	0.227432	0.99666	-5.33358
High	Master Protein	P51150	Ras-related protein Rab-7a OS=Mus musculus OX=10090 GN=Rab7a PE=1 SV=2	9	50	9	1	NA	0.0565765	27.4248	0.377262	0.720376	0.99666	-6.15717
High	Master Protein	Q8R5H6	Wiskott-Aldrich syndrome protein family member 1 OS=Mus musculus OX=10090 GN=Wasf1 PE=1 SV=2	11	55	10	1	NA	0.0904082	26.907	0.59385	0.576653	0.99666	-6.04262
High	Master Protein	Q8R1Q8	Cytoplasmic dynein 1 light intermediate chain 1 OS=Mus musculus OX=10090 GN=Dync1li1 PE=1 SV=1	12	59	12	1	Phospho [S207]	0.00520473	26.6093	0.0374675	0.97146	0.99666	-6.23648
High	Master Protein	P10630	Eukaryotic initiation factor 4A-II OS=Mus musculus OX=10090 GN=Eif4a2 PE=1 SV=2	11	50	6	1	NA	0.31107	26.3517	1.79551	0.128256	0.99666	-4.81016
High	Master Protein	Q8VHH5	Arf-GAP with GTPase, ANK repeat and PH domain-containing protein 3 OS=Mus musculus OX=10090 GN=Agap3 PE=1 SV=1	10	59	8	1	NA	0.0387117	25.8007	0.271086	0.7964	0.99666	-6.19565
High	Master Protein	Q63810	Calcineurin subunit B type 1 OS=Mus musculus OX=10090 GN=Ppp3r1 PE=1 SV=3	7	40	7	1	NA	0.0626821	26.9658	0.391509	0.710419	0.99666	-6.1511
High	Master Protein	P61294	Ras-related protein Rab-6B OS=Mus musculus OX=10090 GN=Rab6b PE=1 SV=1	7	49	4	1	NA	-0.0269818	25.6773	-0.196603	0.851336	0.99666	-6.21531
High	Master Protein	Q8C7R4	Ubiquitin-like modifier-activating enzyme 6 OS=Mus musculus OX=10090 GN=Uba6 PE=1 SV=1	14	43	14	1	NA	0.104681	24.5339	0.62761	0.555882	0.99666	-6.02068
High	Master Protein	P61922	4-aminobutyrate aminotransferase, mitochondrial OS=Mus musculus OX=10090 GN=Abat PE=1 SV=1	11	47	11	1	NA	0.0206492	24.7606	0.144026	0.89071	0.99666	-6.22547
High	Master Protein	Q8K0S0	Phytanoyl-CoA hydroxylase-interacting protein OS=Mus musculus OX=10090 GN=Phyhip PE=1 SV=1	12	48	10	1	Acetyl [N-Term]	0.0687933	27.1451	0.402581	0.702725	0.99666	-6.14623
High	Master Protein	Q80UG5	Septin-9 OS=Mus musculus OX=10090 GN=Septin9 PE=1 SV=1	12	62	12	1	NA	0.108187	26.0317	0.699902	0.513032	0.99666	-5.97023
High	Master Protein	Q6P1F6	Serine/threonine-protein phosphatase 2A 55 kDa regulatory subunit B alpha isoform OS=Mus musculus OX=10090 GN=Ppp2r2a PE=1 SV=1	12	46	8	1	NA	-0.0907125	27.4072	-0.612016	0.565418	0.99666	-6.03095
High	Master Protein	Q9WV60	Glycogen synthase kinase-3 beta OS=Mus musculus OX=10090 GN=Gsk3b PE=1 SV=2	11	50	9	1	NA	-0.801874	26.1607	-1.59936	0.166391	0.99666	-5.05275
High	Master Protein	Q3U0V1	Far upstream element-binding protein 2 OS=Mus musculus OX=10090 GN=Khsrp PE=1 SV=2	12	46	10	1	NA	-0.0276014	25.3224	-0.184188	0.860594	0.99666	-6.21799
High	Master Protein	Q3TXX4	Vesicular glutamate transporter 1 OS=Mus musculus OX=10090 GN=Slc17a7 PE=1 SV=2	9	53	7	1	NA	-0.0129464	28.4731	-0.0864087	0.934259	0.99666	-6.23302
High	Master Protein	Q6PFD5	Disks large-associated protein 3 OS=Mus musculus OX=10090 GN=Dlgap3 PE=1 SV=1	11	53	11	1	NA	-0.197429	26.0754	-1.13505	0.304277	0.99666	-5.58102
High	Master Protein	Q9JLN9	Serine/threonine-protein kinase mTOR OS=Mus musculus OX=10090 GN=Mtor PE=1 SV=2	19	50	19	1	NA	0.0178272	26.8018	0.128209	0.90263	0.99666	-6.22792
High	Master Protein	P62823	Ras-related protein Rab-3C OS=Mus musculus OX=10090 GN=Rab3c PE=1 SV=1	10	68	5	1	NA	-0.0121599	26.2882	-0.0809436	0.938406	0.99666	-6.23355
High	Master Protein	Q8K212	Phosphofurin acidic cluster sorting protein 1 OS=Mus musculus OX=10090 GN=Pacs1 PE=1 SV=2	14	67	14	1	NA	-0.03387	26.1524	-0.236567	0.82172	0.99666	-6.20552
High	Master Protein	P63044	Vesicle-associated membrane protein 2 OS=Mus musculus OX=10090 GN=Vamp2 PE=1 SV=2	5	53	4	1	NA	0.0849337	28.0159	0.59958	0.573094	0.99666	-6.03897
High	Master Protein	Q9ERU9	E3 SUMO-protein ligase RanBP2 OS=Mus musculus OX=10090 GN=Ranbp2 PE=1 SV=2	16	44	15	1	NA	0.163371	25.2991	1.11664	0.311418	0.99666	-5.59999
High	Master Protein	P48318	Glutamate decarboxylase 1 OS=Mus musculus OX=10090 GN=Gad1 PE=1 SV=2	11	31	10	1	NA	0.0384224	25.8264	0.273441	0.794682	0.99666	-6.19493
High	Master Protein	O08759	Ubiquitin-protein ligase E3A OS=Mus musculus OX=10090 GN=Ube3a PE=1 SV=2	10	52	10	1	NA	-0.740526	26.0141	-5.30619	0.00252886	0.459461	-0.965843
High	Master Protein	Q8R071	Inositol-trisphosphate 3-kinase A OS=Mus musculus OX=10090 GN=Itpka PE=1 SV=1	11	47	11	1	NA	-0.203932	25.3708	-1.25799	0.260123	0.99666	-5.44974
High	Master Protein	Q9CZ13	Cytochrome b-c1 complex subunit 1, mitochondrial OS=Mus musculus OX=10090 GN=Uqcrc1 PE=1 SV=2	9	50	8	1	NA	0.13098	26.0663	0.979531	0.369197	0.99666	-5.7351
High	Master Protein	P42859	Huntingtin OS=Mus musculus OX=10090 GN=Htt PE=1 SV=2	14	45	14	1	NA	0.012678	24.7042	0.0857152	0.934786	0.99666	-6.23309
High	Master Protein	Q9Z0R4	Intersectin-1 OS=Mus musculus OX=10090 GN=Itsn1 PE=1 SV=2	15	47	12	1	NA	-1.18531	25.5814	-3.3731	0.0176478	0.679394	-2.85406
High	Master Protein	P80316	T-complex protein 1 subunit epsilon OS=Mus musculus OX=10090 GN=Cct5 PE=1 SV=1	8	45	8	1	NA	0.107009	25.4151	0.687088	0.520462	0.99666	-5.97951
High	Master Protein	Q922J3	CAP-Gly domain-containing linker protein 1 OS=Mus musculus OX=10090 GN=Clip1 PE=1 SV=1	15	50	10	1	Phospho [S199]	-0.155155	24.1353	-0.604751	0.569895	0.99666	-6.03565
High	Master Protein	Q9CWZ7	Gamma-soluble NSF attachment protein OS=Mus musculus OX=10090 GN=Napg PE=1 SV=1	12	66	12	1	NA	0.204583	27.6188	1.44083	0.205076	0.99666	-5.24208
High	Master Protein	P53994	Ras-related protein Rab-2A OS=Mus musculus OX=10090 GN=Rab2a PE=1 SV=1	7	49	7	1	NA	-0.056918	25.3378	-0.376936	0.720604	0.99666	-6.15731
High	Master Protein	P62746	Rho-related GTP-binding protein RhoB OS=Mus musculus OX=10090 GN=Rhob PE=1 SV=1	7	52	5	1	NA	-0.00468339	25.891	-0.0313477	0.97612	0.99666	-6.23672
High	Master Protein	Q80UG2	Plexin-A4 OS=Mus musculus OX=10090 GN=Plxna4 PE=1 SV=3	16	40	9	1	NA	0.377488	25.627	1.58425	0.16975	0.99666	-5.07109
High	Master Protein	Q91V41	Ras-related protein Rab-14 OS=Mus musculus OX=10090 GN=Rab14 PE=1 SV=3	10	57	9	1	NA	0.184459	26.3351	1.21779	0.273897	0.99666	-5.4935
High	Master Protein	Q8CHH9	Septin-8 OS=Mus musculus OX=10090 GN=Septin8 PE=1 SV=4	12	57	8	1	NA	0.0912182	25.8441	0.549896	0.604397	0.99666	-6.0696
High	Master Protein	Q8C078	Calcium/calmodulin-dependent protein kinase kinase 2 OS=Mus musculus OX=10090 GN=Camkk2 PE=1 SV=2	12	45	12	1	NA	-0.0976368	25.6449	-0.557117	0.599786	0.99666	-6.0653
High	Master Protein	P35700	Peroxiredoxin-1 OS=Mus musculus OX=10090 GN=Prdx1 PE=1 SV=1	10	64	10	1	NA	0.00414226	27.6262	0.0286394	0.978182	0.99666	-6.23681
High	Master Protein	Q9JKC6	Cell cycle exit and neuronal differentiation protein 1 OS=Mus musculus OX=10090 GN=Cend1 PE=1 SV=1	7	47	7	1	NA	-0.0266022	27.9452	-0.151843	0.884831	0.99666	-6.22416
High	Master Protein	Q80U23	Syntaphilin OS=Mus musculus OX=10090 GN=Snph PE=1 SV=3	9	40	9	1	NA	-0.170183	25.2171	-1.1396	0.302534	0.99666	-5.5763
High	Master Protein	Q6PAJ1	Breakpoint cluster region protein OS=Mus musculus OX=10090 GN=Bcr PE=1 SV=3	15	46	14	1	NA	0.165186	25.3869	1.20959	0.276784	0.99666	-5.50233
High	Master Protein	P30999	Catenin delta-1 OS=Mus musculus OX=10090 GN=Ctnnd1 PE=1 SV=2	12	45	12	1	NA	-0.288092	25.422	-1.40061	0.21617	0.99666	-5.28887
High	Master Protein	Q8K394	Inactive phospholipase C-like protein 2 OS=Mus musculus OX=10090 GN=Plcl2 PE=1 SV=2	15	56	14	1	NA	0.00897129	25.9906	0.0619421	0.95284	0.99666	-6.23509
High	Master Protein	P62482	Voltage-gated potassium channel subunit beta-2 OS=Mus musculus OX=10090 GN=Kcnab2 PE=1 SV=1	9	39	9	1	NA	0.0150821	25.9963	0.0959111	0.927055	0.99666	-6.23204
High	Master Protein	Q9JLB0	MAGUK p55 subfamily member 6 OS=Mus musculus OX=10090 GN=Mpp6 PE=1 SV=1	12	51	11	1	NA	-0.117464	25.7029	-0.709745	0.507373	0.99666	-5.963
High	Master Protein	O35551	Rab GTPase-binding effector protein 1 OS=Mus musculus OX=10090 GN=Rabep1 PE=1 SV=2	14	44	13	1	NA	0.628261	26.5218	2.12792	0.0826146	0.99666	-4.38787
High	Master Protein	Q2M3X8	Phosphatase and actin regulator 1 OS=Mus musculus OX=10090 GN=Phactr1 PE=1 SV=1	11	42	11	1	NA	-0.0364343	26.9287	-0.237956	0.820696	0.99666	-6.20515
High	Master Protein	Q9CZT8	Ras-related protein Rab-3B OS=Mus musculus OX=10090 GN=Rab3b PE=1 SV=1	7	69	3	1	NA	-0.0858439	25.1281	-0.599749	0.572989	0.99666	-6.03886
High	Master Protein	Q9Z268	RasGAP-activating-like protein 1 OS=Mus musculus OX=10090 GN=Rasal1 PE=1 SV=2	15	52	15	1	NA	-0.162362	26.1006	-1.06537	0.332071	0.99666	-5.65185
High	Master Protein	Q9WTQ5	A-kinase anchor protein 12 OS=Mus musculus OX=10090 GN=Akap12 PE=1 SV=1	13	44	13	1	NA	-0.150014	26.5251	-1.00154	0.359371	0.99666	-5.7142
High	Master Protein	Q91WC3	Long-chain-fatty-acid--CoA ligase 6 OS=Mus musculus OX=10090 GN=Acsl6 PE=1 SV=1	13	37	13	1	NA	-0.179998	25.1209	-0.950633	0.382429	0.99666	-5.76206
High	Master Protein	P02535	Keratin, type I cytoskeletal 10 OS=Mus musculus OX=10090 GN=Krt10 PE=1 SV=3	7	48	4	1	NA	-0.442688	28.4518	-2.80568	0.0347255	0.789147	-3.53067
High	Master Protein	Q9WVQ1	Membrane-associated guanylate kinase, WW and PDZ domain-containing protein 2 OS=Mus musculus OX=10090 GN=Magi2 PE=1 SV=2	13	52	13	1	Phospho [T617]	0.0749488	25.8181	0.550553	0.603976	0.99666	-6.06921
High	Master Protein	Q8CHT1	Ephexin-1 OS=Mus musculus OX=10090 GN=Ngef PE=1 SV=1	11	47	11	1	NA	0.0925046	24.9742	0.596563	0.574967	0.99666	-6.0409
High	Master Protein	P33175	Kinesin heavy chain isoform 5A OS=Mus musculus OX=10090 GN=Kif5a PE=1 SV=3	9	48	1	1	NA	-0.120058	21.6867	-0.817173	0.448418	0.99666	-5.87893
High	Master Protein	P53810	Phosphatidylinositol transfer protein alpha isoform OS=Mus musculus OX=10090 GN=Pitpna PE=1 SV=2	12	44	12	1	NA	-0.0515127	26.0107	-0.238779	0.82009	0.99666	-6.20493
High	Master Protein	P00493	Hypoxanthine-guanine phosphoribosyltransferase OS=Mus musculus OX=10090 GN=Hprt1 PE=1 SV=3	9	44	9	1	NA	-0.130354	26.0648	-0.783554	0.466311	0.99666	-5.90625
High	Master Protein	P80313	T-complex protein 1 subunit eta OS=Mus musculus OX=10090 GN=Cct7 PE=1 SV=1	12	43	12	1	NA	0.898312	25.5	2.54223	0.0483185	0.899207	-3.85977
High	Master Protein	O35954	Membrane-associated phosphatidylinositol transfer protein 1 OS=Mus musculus OX=10090 GN=Pitpnm1 PE=1 SV=1	12	53	12	1	NA	0.449688	25.3504	2.61729	0.0439366	0.882111	-3.76525
High	Master Protein	Q9WUM4	Coronin-1C OS=Mus musculus OX=10090 GN=Coro1c PE=1 SV=2	9	52	9	1	NA	0.0982655	26.2115	0.732579	0.494411	0.99666	-5.94593
High	Master Protein	P13595	Neural cell adhesion molecule 1 OS=Mus musculus OX=10090 GN=Ncam1 PE=1 SV=3	9	40	9	1	NA	-0.037734	25.1076	-0.254497	0.808535	0.99666	-6.20056
High	Master Protein	P60766	Cell division control protein 42 homolog OS=Mus musculus OX=10090 GN=Cdc42 PE=1 SV=2	8	41	7	1	NA	0.13642	26.9411	0.748163	0.485697	0.99666	-5.93402
High	Master Protein	P43276	Histone H1.5 OS=Mus musculus OX=10090 GN=H1-5 PE=1 SV=2	9	63	5	1	NA	-0.0427388	26.1164	-0.290422	0.782335	0.99666	-6.18955
High	Master Protein	O08585	Clathrin light chain A OS=Mus musculus OX=10090 GN=Clta PE=1 SV=2	11	56	11	1	NA	0.022202	29.5218	0.158836	0.879577	0.99666	-6.22292
High	Master Protein	P61750	ADP-ribosylation factor 4 OS=Mus musculus OX=10090 GN=Arf4 PE=1 SV=2	5	56	1	1	NA	0.0534754	22.2817	0.335467	0.749935	0.99666	-6.17376
High	Master Protein	Q80UJ7	Rab3 GTPase-activating protein catalytic subunit OS=Mus musculus OX=10090 GN=Rab3gap1 PE=1 SV=4	11	45	11	1	NA	-0.00250587	25.2264	-0.0165936	0.987358	0.99666	-6.23712
High	Master Protein	Q9D172	Glutamine amidotransferase-like class 1 domain-containing protein 3A, mitochondrial OS=Mus musculus OX=10090 GN=Gatd3a PE=1 SV=1	8	59	8	1	NA	-0.0668811	25.7167	-0.468811	0.657552	0.99666	-6.11447
High	Master Protein	O89053	Coronin-1A OS=Mus musculus OX=10090 GN=Coro1a PE=1 SV=5	10	57	10	1	NA	-0.0184704	26.4549	-0.128461	0.90244	0.99666	-6.22788
High	Master Protein	O35633	Vesicular inhibitory amino acid transporter OS=Mus musculus OX=10090 GN=Slc32a1 PE=1 SV=3	9	39	9	1	NA	-0.388162	24.9429	-2.32612	0.0637761	0.953014	-4.13436
High	Master Protein	P51830	Adenylate cyclase type 9 OS=Mus musculus OX=10090 GN=Adcy9 PE=1 SV=1	12	40	12	1	NA	-0.229196	24.9792	-0.79524	0.460034	0.99666	-5.89685
High	Master Protein	Q9JKK7	Tropomodulin-2 OS=Mus musculus OX=10090 GN=Tmod2 PE=1 SV=2	10	43	9	1	NA	-0.128207	26.6345	-0.898073	0.407456	0.99666	-5.80963
High	Master Protein	Q8CI71	Syndetin OS=Mus musculus OX=10090 GN=Vps50 PE=1 SV=2	9	37	9	1	NA	0.185371	24.0541	1.06142	0.333708	0.99666	-5.65578
High	Master Protein	P70296	Phosphatidylethanolamine-binding protein 1 OS=Mus musculus OX=10090 GN=Pebp1 PE=1 SV=3	7	30	7	1	NA	-0.00932095	26.9969	-0.065944	0.949798	0.99666	-6.2348
High	Master Protein	A2A690	Protein TANC2 OS=Mus musculus OX=10090 GN=Tanc2 PE=1 SV=1	14	57	14	1	NA	0.135096	26.8861	0.841932	0.435567	0.99666	-5.85824
High	Master Protein	P27773	Protein disulfide-isomerase A3 OS=Mus musculus OX=10090 GN=Pdia3 PE=1 SV=2	12	38	12	1	NA	0.194577	26.3507	1.12039	0.309952	0.99666	-5.59614
High	Master Protein	Q01405	Protein transport protein Sec23A OS=Mus musculus OX=10090 GN=Sec23a PE=1 SV=2	11	43	11	1	NA	-0.0202215	25.239	-0.13735	0.895737	0.99666	-6.22654
High	Master Protein	Q9Z1Z2	Serine-threonine kinase receptor-associated protein OS=Mus musculus OX=10090 GN=Strap PE=1 SV=2	8	43	8	1	NA	-0.0526195	25.0271	-0.34685	0.741834	0.99666	-6.16943
High	Master Protein	Q9JJV2	Profilin-2 OS=Mus musculus OX=10090 GN=Pfn2 PE=1 SV=3	5	48	5	1	NA	-0.0736274	26.5817	-0.44074	0.676515	0.99666	-6.12848
High	Master Protein	O88448	Kinesin light chain 2 OS=Mus musculus OX=10090 GN=Klc2 PE=1 SV=1	11	38	8	1	NA	-0.148117	24.8827	-0.874426	0.419123	0.99666	-5.83039
High	Master Protein	Q9D415	Disks large-associated protein 1 OS=Mus musculus OX=10090 GN=Dlgap1 PE=1 SV=3	11	53	10	1	Phospho [S425]	0.0499642	25.591	0.364691	0.729212	0.99666	-6.16236
High	Master Protein	Q8BJ42	Disks large-associated protein 2 OS=Mus musculus OX=10090 GN=Dlgap2 PE=1 SV=2	11	38	9	1	Phospho [S1047]	0.150548	26.3615	0.876558	0.418061	0.99666	-5.82854
High	Master Protein	A2AWA9	Rab GTPase-activating protein 1 OS=Mus musculus OX=10090 GN=Rabgap1 PE=1 SV=1	14	42	14	1	NA	0.0513337	25.6129	0.331209	0.752975	0.99666	-6.17535
High	Master Protein	Q8CBW3	Abl interactor 1 OS=Mus musculus OX=10090 GN=Abi1 PE=1 SV=3	9	59	7	1	NA	0.0401682	27.4667	0.29152	0.781539	0.99666	-6.18919
High	Master Protein	P70297	Signal transducing adapter molecule 1 OS=Mus musculus OX=10090 GN=Stam PE=1 SV=3	12	57	10	1	NA	2.00591	27.6944	8.07822	0.000328153	0.131187	0.790435
High	Master Protein	Q6VNB8	WD repeat and FYVE domain-containing protein 3 OS=Mus musculus OX=10090 GN=Wdfy3 PE=1 SV=1	13	40	13	1	NA	-0.00913722	24.9611	-0.0567074	0.95682	0.99666	-6.23545
High	Master Protein	P97384	Annexin A11 OS=Mus musculus OX=10090 GN=Anxa11 PE=1 SV=2	8	51	8	1	NA	-0.0431661	25.7437	-0.273601	0.794566	0.99666	-6.19488
High	Master Protein	O35737	Heterogeneous nuclear ribonucleoprotein H OS=Mus musculus OX=10090 GN=Hnrnph1 PE=1 SV=3	7	39	5	1	NA	0.00418905	26.7766	0.029077	0.977849	0.99666	-6.2368
High	Master Protein	Q60597	2-oxoglutarate dehydrogenase, mitochondrial OS=Mus musculus OX=10090 GN=Ogdh PE=1 SV=3	13	52	13	1	NA	0.0473377	25.3632	0.309263	0.768719	0.99666	-6.18321
High	Master Protein	P31938	Dual specificity mitogen-activated protein kinase kinase 1 OS=Mus musculus OX=10090 GN=Map2k1 PE=1 SV=2	10	57	10	1	NA	0.120818	27.0532	0.792083	0.461724	0.99666	-5.8994
High	Master Protein	Q8R0A7	Uncharacterized protein KIAA0513 OS=Mus musculus OX=10090 GN=Kiaa0513 PE=1 SV=1	9	57	9	1	NA	0.0503302	26.2144	0.352832	0.737592	0.99666	-6.16709
High	Master Protein	O08749	Dihydrolipoyl dehydrogenase, mitochondrial OS=Mus musculus OX=10090 GN=Dld PE=1 SV=2	10	45	10	1	NA	0.0923045	25.749	0.66105	0.535781	0.99666	-5.99792
High	Master Protein	Q2NL51	Glycogen synthase kinase-3 alpha OS=Mus musculus OX=10090 GN=Gsk3a PE=1 SV=2	8	51	6	1	NA	0.0487445	24.7232	0.35329	0.737267	0.99666	-6.16691
High	Master Protein	Q80UP3	Diacylglycerol kinase zeta OS=Mus musculus OX=10090 GN=Dgkz PE=1 SV=2	12	48	12	1	NA	0.205669	25.293	1.07279	0.329012	0.99666	-5.64443
High	Master Protein	Q61081	Hsp90 co-chaperone Cdc37 OS=Mus musculus OX=10090 GN=Cdc37 PE=1 SV=1	9	42	9	1	NA	-0.974799	25.6234	-1.3129	0.242318	0.99666	-5.3888
High	Master Protein	Q9JJK2	LanC-like protein 2 OS=Mus musculus OX=10090 GN=Lancl2 PE=1 SV=1	8	51	8	1	NA	-0.0362571	25.4369	-0.230984	0.825839	0.99666	-6.207
High	Master Protein	B1AZP2	Disks large-associated protein 4 OS=Mus musculus OX=10090 GN=Dlgap4 PE=1 SV=1	10	41	9	1	NA	-0.0956144	25.0657	-0.67433	0.527931	0.99666	-5.9886
High	Master Protein	P80315	T-complex protein 1 subunit delta OS=Mus musculus OX=10090 GN=Cct4 PE=1 SV=3	11	36	11	1	NA	0.416909	25.2862	2.18609	0.0765436	0.99666	-4.31342
High	Master Protein	Q64516	Glycerol kinase OS=Mus musculus OX=10090 GN=Gk PE=1 SV=2	11	39	11	1	NA	-0.0642015	25.399	-0.460562	0.663096	0.99666	-6.11867
High	Master Protein	P62897	Cytochrome c, somatic OS=Mus musculus OX=10090 GN=Cycs PE=1 SV=2	6	44	6	1	NA	-0.106085	26.4701	-0.618541	0.561415	0.99666	-6.02668
High	Master Protein	P39447	Tight junction protein ZO-1 OS=Mus musculus OX=10090 GN=Tjp1 PE=1 SV=2	14	37	14	1	NA	0.00612644	24.6738	0.0305336	0.97674	0.99666	-6.23675
High	Master Protein	P83510	Traf2 and NCK-interacting protein kinase OS=Mus musculus OX=10090 GN=Tnik PE=1 SV=2	11	40	5	1	Phospho [S948; T950]	-0.246001	23.7064	-1.59897	0.166476	0.99666	-5.05322
High	Master Protein	Q01065	Calcium/calmodulin-dependent 3',5'-cyclic nucleotide phosphodiesterase 1B OS=Mus musculus OX=10090 GN=Pde1b PE=1 SV=2	10	33	9	1	NA	-0.0799947	25.0569	-0.522659	0.621974	0.99666	-6.08539
High	Master Protein	Q9Z2Y3	Homer protein homolog 1 OS=Mus musculus OX=10090 GN=Homer1 PE=1 SV=2	9	46	9	1	NA	0.102012	26.0885	0.722209	0.500269	0.99666	-5.95374
High	Master Protein	Q7TQH0	Ataxin-2-like protein OS=Mus musculus OX=10090 GN=Atxn2l PE=1 SV=1	13	50	11	1	NA	0.0685989	25.6633	0.415435	0.693842	0.99666	-6.14042
High	Master Protein	O55106	Striatin OS=Mus musculus OX=10090 GN=Strn PE=1 SV=2	12	35	12	1	NA	0.0630312	26.0585	0.0957452	0.927181	0.99666	-6.23206
High	Master Protein	Q9Z2I9	Succinate--CoA ligase [ADP-forming] subunit beta, mitochondrial OS=Mus musculus OX=10090 GN=Sucla2 PE=1 SV=2	9	57	9	1	NA	0.111019	25.4684	0.757372	0.480599	0.99666	-5.92689
High	Master Protein	Q8C1B1	Calmodulin-regulated spectrin-associated protein 2 OS=Mus musculus OX=10090 GN=Camsap2 PE=1 SV=3	14	37	14	1	Phospho [S647]	-0.0071602	25.25	-0.0203736	0.984478	0.99666	-6.23704
High	Master Protein	Q14BI2	Metabotropic glutamate receptor 2 OS=Mus musculus OX=10090 GN=Grm2 PE=1 SV=2	12	45	11	1	NA	0.680084	26.1439	2.68847	0.0401762	0.838878	-3.67614
High	Master Protein	Q02257	Junction plakoglobin OS=Mus musculus OX=10090 GN=Jup PE=1 SV=3	11	43	5	1	NA	0.152023	22.8699	1.00641	0.357222	0.99666	-5.70953
High	Master Protein	G3X9K3	Brefeldin A-inhibited guanine nucleotide-exchange protein 1 OS=Mus musculus OX=10090 GN=Arfgef1 PE=1 SV=1	14	38	7	1	NA	0.117173	25.3383	0.807809	0.45335	0.99666	-5.88662
High	Master Protein	Q6IRU5	Clathrin light chain B OS=Mus musculus OX=10090 GN=Cltb PE=1 SV=1	8	58	8	1	NA	-0.0419313	28.1678	-0.305892	0.771148	0.99666	-6.18437
High	Master Protein	O88712	C-terminal-binding protein 1 OS=Mus musculus OX=10090 GN=Ctbp1 PE=1 SV=2	9	47	9	1	NA	-0.122864	27.9266	-0.85835	0.427199	0.99666	-5.84427
High	Master Protein	Q5SVL6	Rap1 GTPase-activating protein 2 OS=Mus musculus OX=10090 GN=Rap1gap2 PE=1 SV=1	9	49	8	1	NA	0.080041	25.4692	0.515982	0.626326	0.99666	-6.08915
High	Master Protein	Q9DC07	LIM zinc-binding domain-containing Nebulette OS=Mus musculus OX=10090 GN=Nebl PE=1 SV=1	10	47	9	1	NA	-0.0728978	25.9564	-0.455923	0.666224	0.99666	-6.121
High	Master Protein	P57722	Poly(rC)-binding protein 3 OS=Mus musculus OX=10090 GN=Pcbp3 PE=1 SV=3	7	47	3	1	NA	0.564852	22.5712	3.26024	0.0201113	0.679394	-2.98458
High	Master Protein	P49312	Heterogeneous nuclear ribonucleoprotein A1 OS=Mus musculus OX=10090 GN=Hnrnpa1 PE=1 SV=2	9	44	7	1	NA	-0.205185	24.7486	-0.95757	0.379219	0.99666	-5.75564
High	Master Protein	Q5SRX1	TOM1-like protein 2 OS=Mus musculus OX=10090 GN=Tom1l2 PE=1 SV=1	10	51	10	1	NA	0.103462	26.1976	0.654056	0.539945	0.99666	-6.00276
High	Master Protein	Q9R1Q8	Transgelin-3 OS=Mus musculus OX=10090 GN=Tagln3 PE=1 SV=1	10	41	10	1	NA	-0.0733907	26.7492	-0.515711	0.626503	0.99666	-6.08931
High	Master Protein	Q9R1R2	Tripartite motif-containing protein 3 OS=Mus musculus OX=10090 GN=Trim3 PE=1 SV=1	11	42	10	1	NA	-0.0450834	26.1682	-0.286213	0.785389	0.99666	-6.19091
High	Master Protein	Q8BG05	Heterogeneous nuclear ribonucleoprotein A3 OS=Mus musculus OX=10090 GN=Hnrnpa3 PE=1 SV=1	7	48	6	1	NA	0.0172728	26.2075	0.119113	0.909498	0.99666	-6.2292
High	Master Protein	Q5DQR4	Syntaxin-binding protein 5-like OS=Mus musculus OX=10090 GN=Stxbp5l PE=1 SV=1	13	44	12	1	NA	-0.218935	25.9114	-1.5132	0.186456	0.99666	-5.15656
High	Master Protein	P0DP27	Calmodulin-2 OS=Mus musculus OX=10090 GN=Calm2 PE=1 SV=1	8	45	8	1	NA	0.0673538	28.3426	0.46233	0.661906	0.99666	-6.11778
High	Master Protein	Q9CZ44	NSFL1 cofactor p47 OS=Mus musculus OX=10090 GN=Nsfl1c PE=1 SV=1	8	40	8	1	NA	0.219263	25.9181	1.02046	0.351092	0.99666	-5.69598
High	Master Protein	Q8VDQ8	NAD-dependent protein deacetylase sirtuin-2 OS=Mus musculus OX=10090 GN=Sirt2 PE=1 SV=2	9	34	9	1	NA	0.110968	25.3996	0.733313	0.493998	0.99666	-5.94537
High	Master Protein	Q61171	Peroxiredoxin-2 OS=Mus musculus OX=10090 GN=Prdx2 PE=1 SV=3	8	50	8	1	NA	0.0291131	28.5541	0.213913	0.838471	0.99666	-6.21129
High	Master Protein	Q69ZW3	EH domain-binding protein 1 OS=Mus musculus OX=10090 GN=Ehbp1 PE=1 SV=3	12	34	12	1	NA	-0.141364	23.772	-0.588897	0.579741	0.99666	-6.04576
High	Master Protein	Q60865	Caprin-1 OS=Mus musculus OX=10090 GN=Caprin1 PE=1 SV=2	10	40	10	1	NA	-0.0798231	26.1741	-0.538491	0.611722	0.99666	-6.0763
High	Master Protein	Q60676	Serine/threonine-protein phosphatase 5 OS=Mus musculus OX=10090 GN=Ppp5c PE=1 SV=3	9	45	9	1	NA	0.0494098	25.2812	0.341517	0.745625	0.99666	-6.17147
High	Master Protein	Q9EQQ9	Protein O-GlcNAcase OS=Mus musculus OX=10090 GN=Oga PE=1 SV=2	11	41	11	1	NA	0.0606051	25.1945	0.353024	0.737456	0.99666	-6.16702
High	Master Protein	Q8C8N2	Protein SCAI OS=Mus musculus OX=10090 GN=Scai PE=1 SV=2	10	41	10	1	NA	-2.37947	27.3588	-11.7926	4.70025e-05	0.0395808	2.11054
High	Master Protein	Q9QYS2	Metabotropic glutamate receptor 3 OS=Mus musculus OX=10090 GN=Grm3 PE=1 SV=1	11	43	10	1	NA	-0.0196249	25.8843	-0.144732	0.890179	0.99666	-6.22535
High	Master Protein	P46097	Synaptotagmin-2 OS=Mus musculus OX=10090 GN=Syt2 PE=1 SV=1	8	39	2	1	NA	-0.236925	21.0364	-1.49359	0.191336	0.99666	-5.17989
High	Master Protein	O89112	Glutathione S-transferase LANCL1 OS=Mus musculus OX=10090 GN=Lancl1 PE=1 SV=1	10	41	10	1	NA	-0.224016	26.5999	-1.2988	0.246782	0.99666	-5.40458
High	Master Protein	P63001	Ras-related C3 botulinum toxin substrate 1 OS=Mus musculus OX=10090 GN=Rac1 PE=1 SV=1	7	41	6	1	NA	0.0890619	28.0735	0.577309	0.587002	0.99666	-6.05299
High	Master Protein	Q9CZC8	Secernin-1 OS=Mus musculus OX=10090 GN=Scrn1 PE=1 SV=1	7	37	7	1	NA	-0.0275689	26.1366	-0.167302	0.873228	0.99666	-6.22135
High	Master Protein	Q9DC51	Guanine nucleotide-binding protein G(i) subunit alpha OS=Mus musculus OX=10090 GN=Gnai3 PE=1 SV=3	8	43	3	1	NA	0.0430691	23.0158	0.299943	0.775443	0.99666	-6.18639
High	Master Protein	Q8R0S4	Voltage-dependent L-type calcium channel subunit beta-4 OS=Mus musculus OX=10090 GN=Cacnb4 PE=1 SV=2	10	48	6	1	NA	-0.174716	25.3867	-1.106	0.315616	0.99666	-5.61088
High	Master Protein	P36916	Guanine nucleotide-binding protein-like 1 OS=Mus musculus OX=10090 GN=Gnl1 PE=1 SV=4	10	42	10	1	NA	0.400848	27.5801	1.19977	0.280276	0.99666	-5.51285
High	Master Protein	B1AY13	Ubiquitin carboxyl-terminal hydrolase 24 OS=Mus musculus OX=10090 GN=Usp24 PE=1 SV=1	11	35	11	1	Phospho [S2044]	0.233475	23.8567	1.21725	0.274084	0.99666	-5.49407
High	Master Protein	Q9JKF6	Nectin-1 OS=Mus musculus OX=10090 GN=Nectin1 PE=1 SV=3	9	32	9	1	NA	0.014541	26.4637	0.0992733	0.924508	0.99666	-6.23166
High	Master Protein	Q3UVL4	Vacuolar protein sorting-associated protein 51 homolog OS=Mus musculus OX=10090 GN=Vps51 PE=1 SV=2	11	34	11	1	NA	0.226567	24.8875	1.2004	0.28005	0.99666	-5.51218
High	Master Protein	Q3U1J4	DNA damage-binding protein 1 OS=Mus musculus OX=10090 GN=Ddb1 PE=1 SV=2	13	57	13	1	NA	-0.0357892	25.45	-0.251474	0.810754	0.99666	-6.20142
High	Master Protein	P70168	Importin subunit beta-1 OS=Mus musculus OX=10090 GN=Kpnb1 PE=1 SV=2	9	49	9	1	NA	0.16868	24.8039	1.05929	0.334593	0.99666	-5.65789
High	Master Protein	Q3UM45	Protein phosphatase 1 regulatory subunit 7 OS=Mus musculus OX=10090 GN=Ppp1r7 PE=1 SV=2	8	36	8	1	NA	-0.0412456	29.0112	-0.297211	0.777418	0.99666	-6.18731
High	Master Protein	Q61885	Myelin-oligodendrocyte glycoprotein OS=Mus musculus OX=10090 GN=Mog PE=1 SV=1	8	49	8	1	NA	0.0166763	27.0738	0.118965	0.909609	0.99666	-6.22922
High	Master Protein	Q6PER3	Microtubule-associated protein RP/EB family member 3 OS=Mus musculus OX=10090 GN=Mapre3 PE=1 SV=1	9	53	7	1	NA	0.027114	27.6092	0.196172	0.851657	0.99666	-6.21541
High	Master Protein	Q6A4J8	Ubiquitin carboxyl-terminal hydrolase 7 OS=Mus musculus OX=10090 GN=Usp7 PE=1 SV=1	11	40	11	1	NA	0.142962	25.3219	1.02133	0.350714	0.99666	-5.69514
High	Master Protein	P02088	Hemoglobin subunit beta-1 OS=Mus musculus OX=10090 GN=Hbb-b1 PE=1 SV=2	6	40	6	1	NA	-0.0685776	28.4091	-0.487187	0.64529	0.99666	-6.10487
High	Master Protein	P97300	Neuroplastin OS=Mus musculus OX=10090 GN=Nptn PE=1 SV=3	8	32	8	1	NA	0.0776873	27.6291	0.47366	0.654305	0.99666	-6.11197
High	Master Protein	P04370	Myelin basic protein OS=Mus musculus OX=10090 GN=Mbp PE=1 SV=2	7	60	7	1	Phospho [T229]	-0.0138423	30.4432	-0.0973182	0.925989	0.99666	-6.23188
High	Master Protein	Q8R001	Microtubule-associated protein RP/EB family member 2 OS=Mus musculus OX=10090 GN=Mapre2 PE=1 SV=1	10	46	8	1	NA	-0.0110012	26.8877	-0.059608	0.954615	0.99666	-6.23525
High	Master Protein	Q9ES28	Rho guanine nucleotide exchange factor 7 OS=Mus musculus OX=10090 GN=Arhgef7 PE=1 SV=2	11	38	11	1	NA	0.0779941	24.6689	0.578056	0.586532	0.99666	-6.05253
High	Master Protein	Q8VHI6	Wiskott-Aldrich syndrome protein family member 3 OS=Mus musculus OX=10090 GN=Wasf3 PE=1 SV=1	9	36	8	1	NA	-0.0802263	24.9419	-0.490416	0.643148	0.99666	-6.10315
High	Master Protein	Q9JLV5	Cullin-3 OS=Mus musculus OX=10090 GN=Cul3 PE=1 SV=1	10	36	10	1	NA	-0.0730257	24.669	-0.449019	0.670894	0.99666	-6.12443
High	Master Protein	E9Q8I9	Protein furry homolog OS=Mus musculus OX=10090 GN=Fry PE=1 SV=1	10	43	10	1	NA	0.193548	24.3246	1.37048	0.224844	0.99666	-5.32354
High	Master Protein	Q9ESN6	Tripartite motif-containing protein 2 OS=Mus musculus OX=10090 GN=Trim2 PE=1 SV=1	10	41	9	1	NA	-0.00358103	24.9471	-0.0235201	0.982081	0.99666	-6.23697
High	Master Protein	Q8VD04	GRIP1-associated protein 1 OS=Mus musculus OX=10090 GN=Gripap1 PE=1 SV=1	11	35	11	1	NA	-0.0683147	24.7418	-0.455324	0.666629	0.99666	-6.1213
High	Master Protein	Q99N28	Cell adhesion molecule 3 OS=Mus musculus OX=10090 GN=Cadm3 PE=1 SV=1	8	38	8	1	NA	0.141441	25.8124	0.816054	0.449005	0.99666	-5.87985
High	Master Protein	P63005	Platelet-activating factor acetylhydrolase IB subunit alpha OS=Mus musculus OX=10090 GN=Pafah1b1 PE=1 SV=2	11	42	11	1	NA	0.0234764	29.0213	0.168259	0.872511	0.99666	-6.22117
High	Master Protein	Q9CZW5	Mitochondrial import receptor subunit TOM70 OS=Mus musculus OX=10090 GN=Tomm70 PE=1 SV=2	11	59	11	1	NA	0.158354	25.3517	1.08771	0.322937	0.99666	-5.62944
High	Master Protein	P61164	Alpha-centractin OS=Mus musculus OX=10090 GN=Actr1a PE=1 SV=1	7	38	3	1	NA	0.364617	24.5165	1.56025	0.175225	0.99666	-5.10011
High	Master Protein	Q99MI1	ELKS/Rab6-interacting/CAST family member 1 OS=Mus musculus OX=10090 GN=Erc1 PE=1 SV=1	9	26	3	1	NA	-0.105184	22.9659	-0.757752	0.480389	0.99666	-5.9266
High	Master Protein	Q3UH60	Disco-interacting protein 2 homolog B OS=Mus musculus OX=10090 GN=Dip2b PE=1 SV=1	11	43	10	1	NA	0.0933837	24.672	0.693569	0.516695	0.99666	-5.97483
High	Master Protein	Q8BH44	Coronin-2B OS=Mus musculus OX=10090 GN=Coro2b PE=1 SV=2	11	38	11	1	NA	-0.166474	25.462	-1.12635	0.307636	0.99666	-5.59001
High	Master Protein	Q8JZW4	Copine-5 OS=Mus musculus OX=10090 GN=Cpne5 PE=1 SV=1	8	41	6	1	NA	0.109604	25.1314	0.734638	0.493253	0.99666	-5.94437
High	Master Protein	Q9QZ06	Toll-interacting protein OS=Mus musculus OX=10090 GN=Tollip PE=1 SV=1	9	37	9	1	NA	0.0310771	25.9454	0.205075	0.845032	0.99666	-6.21338
High	Master Protein	Q58A65	C-Jun-amino-terminal kinase-interacting protein 4 OS=Mus musculus OX=10090 GN=Spag9 PE=1 SV=2	12	45	9	1	NA	0.126785	24.7792	0.773353	0.471841	0.99666	-5.91436
High	Master Protein	P06745	Glucose-6-phosphate isomerase OS=Mus musculus OX=10090 GN=Gpi PE=1 SV=4	8	43	8	1	NA	0.0486553	25.1551	0.338827	0.74754	0.99666	-6.1725
[truncated: 1,495 more rows]
