# Supplementary material for: Dynamic proteomic and phosphoproteomic atlas of corticostriatal axons in neurodevelopment
Source: eLife. 2022 Oct 14;11:e78847. doi: 10.7554/eLife.78847 (PMC9629834; doi:10.7554/eLife.78847)
Supplement: Supplementary file 4. [file elife-78847-supp4.xlsx]

## Sheet: all_proteinID_PDoutput
Protein FDR Confidence: Combined	Accession	Description	Exp. q-value: Combined	Sum PEP Score	Coverage [%]	# Peptides	# PSMs	# Unique Peptides	# AAs	MW [kDa]	calc. pI	Score Sequest HT: Sequest HT	# Peptides (by Search Engine): Sequest HT	Pfam IDs	Entrez Gene ID	Ensembl Gene ID	Gene Symbol	Gene ID	WikiPathways	Reactome Pathways	# Protein Pathway Groups	# Razor Peptides
High	Q6ZPJ3	(E3-independent) E2 ubiquitin-conjugating enzyme UBE2O OS=Mus musculus OX=10090 GN=Ube2o PE=1 SV=3	0	95.535	24	26	67	26	1288	140.7	5.06	156	26		217342	ENSMUSG00000020802	Ube2o	A2A7X3; mmu:217342; Q60800; Q6PCR9; Q6ZPJ3; Q7TPN2; Q8BLE8		Antigen processing: Ubiquitination & Proteasome degradation	1	0
Medium	Q99JT9	1,2-dihydroxy-3-keto-5-methylthiopentene dioxygenase OS=Mus musculus OX=10090 GN=Adi1 PE=1 SV=1	0.029	2.083	8	1	1	1	179	21.5	5.5	2.82	1	Pf03079	104923	ENSMUSG00000020629	Adi1	mmu:104923; Q99JT9		Methionine salvage pathway	1	0
High	Q9D6Y9	1,4-alpha-glucan-branching enzyme OS=Mus musculus OX=10090 GN=Gbe1 PE=1 SV=1	0	32.372	15	9	15	9	702	80.3	6.43	34.14	9	Pf00128, Pf02806, Pf02922	74185	ENSMUSG00000022707	Gbe1	mmu:74185; Q9D6Y9	Glycogen Metabolism	Glycogen synthesis	2	0
High	O35083	1-acyl-sn-glycerol-3-phosphate acyltransferase alpha OS=Mus musculus OX=10090 GN=Agpat1 PE=1 SV=1	0	14.577	13	2	7	2	285	31.7	9.14	29.87	2	Pf01553	55979		Agpat1	mmu:55979; O35083; O35446	Triacylglyceride Synthesis	ChREBP activates metabolic gene expression; Synthesis of PA	3	0
High	Q8K4X7	1-acyl-sn-glycerol-3-phosphate acyltransferase delta OS=Mus musculus OX=10090 GN=Agpat4 PE=1 SV=1	0	12.976	12	5	10	5	378	43.8	8.38	16.29	5	Pf01553, Pf16076	68262	ENSMUSG00000023827	Agpat4	mmu:68262; Q3TKN0; Q8K4X7; Q9DB84	Triacylglyceride Synthesis; Glycerolipids and Glycerophospholipids	Synthesis of PA	3	0
Low	Q9D1E8	1-acyl-sn-glycerol-3-phosphate acyltransferase epsilon OS=Mus musculus OX=10090 GN=Agpat5 PE=1 SV=2	0.103	1.251	4	1	2	1	365	42.2	9.38	2.19	1	Pf01553, Pf16076	52123	ENSMUSG00000031467	Agpat5	mmu:52123; Q3U702; Q8BG61; Q8CGN6; Q9D1E8	Triacylglyceride Synthesis	Synthesis of PA	2	0
High	Q9D517	1-acyl-sn-glycerol-3-phosphate acyltransferase gamma OS=Mus musculus OX=10090 GN=Agpat3 PE=1 SV=2	0	7.14	8	3	5	3	376	43.3	8.51	8.31	3	Pf01553, Pf16076	28169	ENSMUSG00000001211	Agpat3	C4B4E7; mmu:28169; Q7TT39; Q8BST2; Q9D517	Triacylglyceride Synthesis	COPI-independent Golgi-to-ER retrograde traffic; Synthesis of PA	3	0
Low	Q91WW7	1-acylglycerol-3-phosphate O-acyltransferase Pnpla3 OS=Mus musculus OX=10090 GN=Pnpla3 PE=1 SV=1	0.251	0.734	5	1	1	1	413	45.7	7.01	0	1	Pf01734	116939		Pnpla3	mmu:116939; Q91WW7	Glycerolipids and Glycerophospholipids; Adipogenesis genes	Acyl chain remodeling of DAG and TAG	3	0
High	Q9Z1T6	1-phosphatidylinositol 3-phosphate 5-kinase OS=Mus musculus OX=10090 GN=Pikfyve PE=1 SV=3	0	41.779	9	17	26	17	2097	236.7	6.68	42.6	17	Pf00118	18711	ENSMUSG00000025949	Pikfyve	E9QL40; mmu:18711; Q3TNE4; Q3UTT6; Q69ZU1; Q9CU94; Q9Z1T6		Synthesis of PIPs at the Golgi membrane; Synthesis of PIPs at the early endosome membrane; Synthesis of PIPs at the late endosome membrane	3	0
High	Q9Z1B3	1-phosphatidylinositol 4,5-bisphosphate phosphodiesterase beta-1 OS=Mus musculus OX=10090 GN=Plcb1 PE=1 SV=2	0	197.464	35	43	88	43	1216	138.3	6.13	222.08	43	Pf00387, Pf00388, Pf08703	18795	ENSMUSG00000051177	Plcb1	mmu:18795; Q62075; Q6PDH1; Q8K5A5; Q8K5A6; Q9Z0E5; Q9Z1B3; Q9Z2T5	Alzheimers Disease; Chemokine signaling pathway; IL-2 Signaling Pathway	Ca2+ pathway; G alpha (q) signalling events; G beta:gamma signalling through PLC beta; Presynaptic function of Kainate receptors; Synthesis of IP3 and IP4 in the cytosol; PLC beta mediated events; Acetylcholine regulates insulin secretion; Fatty Acids bound to GPR40 (FFAR1) regulate insulin secretion	11	0
High	Q8R3B1	1-phosphatidylinositol 4,5-bisphosphate phosphodiesterase delta-1 OS=Mus musculus OX=10090 GN=Plcd1 PE=1 SV=2	0.001	5.377	2	1	1	1	756	85.8	6.21	3.34	1	Pf00387, Pf00388	18799	ENSMUSG00000010660	Plcd1	mmu:18799; Q8R3B1; Q9Z1B4	Myometrial Relaxation and Contraction Pathways	Synthesis of IP3 and IP4 in the cytosol	2	0
Low	Q8K2J0	1-phosphatidylinositol 4,5-bisphosphate phosphodiesterase delta-3 OS=Mus musculus OX=10090 GN=Plcd3 PE=1 SV=2	0.152	1.002	3	1	1	1	785	88.6	6.83	0	1	Pf00387, Pf00388, Pf14788	72469	ENSMUSG00000020937	Plcd3	A2AHR0; A2AHR1; mmu:72469; Q3UME8; Q69Z55; Q8BL19; Q8K2J0		Synthesis of IP3 and IP4 in the cytosol	1	0
Low	Q8K4S1	1-phosphatidylinositol 4,5-bisphosphate phosphodiesterase epsilon-1 OS=Mus musculus OX=10090 GN=Plce1 PE=1 SV=3	0.177	0.915	1	1	1	1	2282	254.9	6.15	2.05	1	Pf00387, Pf00388, Pf00617, Pf00788	74055	ENSMUSG00000024998	Plce1	B9EHS1; E9Q5G0; mmu:74055; Q3TS68; Q80TC4; Q8BZF3; Q8K4S1; Q9JKM2	Primary Focal Segmental Glomerulosclerosis FSGS; Kit Receptor Signaling Pathway	Synthesis of IP3 and IP4 in the cytosol	3	0
High	A2AP18	1-phosphatidylinositol 4,5-bisphosphate phosphodiesterase eta-2 OS=Mus musculus OX=10090 GN=Plch2 PE=1 SV=2	0	24.381	4	6	12	4	1501	164.2	7.49	26.68	6	Pf00387, Pf00388	269615	ENSMUSG00000029055	Plch2	A2AP18; A6PWW5; mmu:269615; Q3LUA7; Q4QSC7; Q80WP6; Q8BJV1; Q8BWU4; Q8BXN5; Q8CFR1		Synthesis of IP3 and IP4 in the cytosol	1	0
High	Q62077	1-phosphatidylinositol 4,5-bisphosphate phosphodiesterase gamma-1 OS=Mus musculus OX=10090 GN=Plcg1 PE=1 SV=2	0	63.403	18	20	34	20	1302	149.6	5.8	72.21	20	Pf00387, Pf00388	18803	ENSMUSG00000016933	Plcg1	mmu:18803; Q62077; Q6P1G1	ErbB signaling pathway; Primary Focal Segmental Glomerulosclerosis FSGS; IL-1 Signaling Pathway; Myometrial Relaxation and Contraction Pathways; IL-6 signaling Pathway; Kit Receptor Signaling Pathway; EGFR1 Signaling Pathway	Synthesis of IP3 and IP4 in the cytosol; Role of phospholipids in phagocytosis; Downstream signal transduction; EGFR interacts with phospholipase C-gamma; RET signaling; DAP12 signaling; ISG15 antiviral mechanism; FCERI mediated Ca+2 mobilization; PECAM1 interactions; Generation of second messenger molecules; FCERI mediated MAPK activation; VEGFR2 mediated cell proliferation; Phospholipase C-medi…	25	0
Low	Q8CIH5	1-phosphatidylinositol 4,5-bisphosphate phosphodiesterase gamma-2 OS=Mus musculus OX=10090 GN=Plcg2 PE=1 SV=1	0.076	1.472	1	2	2	1	1265	147.5	6.77	1.66	2	Pf00387, Pf00388	234779	ENSMUSG00000034330	Plcg2	mmu:234779; Q3UBA8; Q3UQT0; Q8CIH5; Q8VE69	Microglia Pathogen Phagocytosis Pathway; Myometrial Relaxation and Contraction Pathways; EGFR1 Signaling Pathway	Synthesis of IP3 and IP4 in the cytosol; Role of phospholipids in phagocytosis; CLEC7A (Dectin-1) signaling; Antigen activates B Cell Receptor (BCR) leading to generation of second messengers; GPVI-mediated activation cascade; DAP12 signaling; FCERI mediated Ca+2 mobilization; Generation of second messenger molecules; FCERI mediated MAPK activation; Toll Like Receptor 4 (TLR4) Cascade; Dectin-2 f…	14	0
High	Q64433	10 kDa heat shock protein, mitochondrial OS=Mus musculus OX=10090 GN=Hspe1 PE=1 SV=2	0	14.161	44	6	14	6	102	11	8.35	20.64	6		15528	ENSMUSG00000073676	Hspe1	mmu:15528; Q64433		RHOG GTPase cycle	1	0
High	O08810	116 kDa U5 small nuclear ribonucleoprotein component OS=Mus musculus OX=10090 GN=Eftud2 PE=1 SV=1	0	25.922	14	11	15	11	971	109.3	5	22.26	11	Pf00009, Pf00679, Pf03144, Pf03764, Pf14492, Pf16004	20624	ENSMUSG00000020929	Eftud2	mmu:20624; O08810	mRNA processing	mRNA Splicing - Major Pathway; mRNA Splicing - Minor Pathway	3	0
High	Q9DAK9	14 kDa phosphohistidine phosphatase OS=Mus musculus OX=10090 GN=Phpt1 PE=1 SV=1	0	20.437	45	5	10	5	124	14	5.53	27.3	5	Pf05005	75454	ENSMUSG00000036504	Phpt1	mmu:75454; Q9DAK9			0	0
High	Q9CQV8	14-3-3 protein beta/alpha OS=Mus musculus OX=10090 GN=Ywhab PE=1 SV=3	0	88.9	61	15	101	8	246	28.1	4.83	222.77	15	Pf00244	54401	ENSMUSG00000018326	Ywhab	mmu:54401; O70455; Q3TY33; Q3UAN6; Q9CQV8	TNF-alpha NF-kB Signaling Pathway; IL-3 Signaling Pathway; Myometrial Relaxation and Contraction Pathways; Alpha6-Beta4 Integrin Signaling Pathway; Calcium Regulation in the Cardiac Cell; EGFR1 Signaling Pathway	mTORC1-mediated signalling; Rap1 signalling; Negative regulation of MAPK pathway; TP53 Regulates Metabolic Genes; MAP2K and MAPK activation; Activation of BAD and translocation to mitochondria ; RHO GTPases activate PKNs; Chk1/Chk2(Cds1) mediated inactivation of Cyclin B:Cdk1 complex; Regulation of localization of FOXO transcription factors; Frs2-mediated activation; RAF activation; Tristetraprol…	21	0
High	P62259	14-3-3 protein epsilon OS=Mus musculus OX=10090 GN=Ywhae PE=1 SV=1	0	88.426	73	20	74	17	255	29.2	4.74	151.69	20	Pf00244	22627	ENSMUSG00000020849	Ywhae	mmu:22627; P29360; P42655; P62259; Q63631	TNF-alpha NF-kB Signaling Pathway; Myometrial Relaxation and Contraction Pathways; Alpha6-Beta4 Integrin Signaling Pathway; Calcium Regulation in the Cardiac Cell	RAB GEFs exchange GTP for GDP on RABs; TP53 Regulates Metabolic Genes; Regulation of HSF1-mediated heat shock response; Anchoring of the basal body to the plasma membrane; Regulation of PLK1 Activity at G2/M Transition; Loss of Nlp from mitotic centrosomes; Recruitment of mitotic centrosome proteins and complexes; Recruitment of NuMA to mitotic centrosomes; AURKA Activation by TPX2; Activation of…	20	0
High	P68510	14-3-3 protein eta OS=Mus musculus OX=10090 GN=Ywhah PE=1 SV=2	0	88.18	54	18	81	13	246	28.2	4.89	171.87	18	Pf00244	22629	ENSMUSG00000018965	Ywhah	mmu:22629; P11576; P68510; P70198; Q3TGZ9	TNF-alpha NF-kB Signaling Pathway; Myometrial Relaxation and Contraction Pathways; Alpha6-Beta4 Integrin Signaling Pathway; Calcium Regulation in the Cardiac Cell	TP53 Regulates Metabolic Genes; Activation of BAD and translocation to mitochondria ; RHO GTPases activate PKNs; Chk1/Chk2(Cds1) mediated inactivation of Cyclin B:Cdk1 complex	8	1
High	P61982	14-3-3 protein gamma OS=Mus musculus OX=10090 GN=Ywhag PE=1 SV=2	0	97.342	62	18	107	11	247	28.3	4.89	230.36	18	Pf00244	22628	ENSMUSG00000051391	Ywhag	mmu:22628; O70457; P35214; P61982; Q3UFD6; Q4FK44; Q9UDP2; Q9UN99	TNF-alpha NF-kB Signaling Pathway; Myometrial Relaxation and Contraction Pathways; Calcium Regulation in the Cardiac Cell	Anchoring of the basal body to the plasma membrane; Regulation of PLK1 Activity at G2/M Transition; Loss of Nlp from mitotic centrosomes; Recruitment of mitotic centrosome proteins and complexes; Recruitment of NuMA to mitotic centrosomes; AURKA Activation by TPX2; TP53 Regulates Metabolic Genes; Activation of BAD and translocation to mitochondria ; RHO GTPases activate PKNs; Chk1/Chk2(Cds1) medi…	15	4
High	P68254	14-3-3 protein theta OS=Mus musculus OX=10090 GN=Ywhaq PE=1 SV=1	0	75.87	66	19	81	14	245	27.8	4.78	159.02	19	Pf00244	22630	ENSMUSG00000076432	Ywhaq	mmu:22630; P35216; P68254; Q3TW69; Q3UJN5; Q5SP76; Q5U423; Q66JR6	Primary Focal Segmental Glomerulosclerosis FSGS; Myometrial Relaxation and Contraction Pathways; Calcium Regulation in the Cardiac Cell	Chk1/Chk2(Cds1) mediated inactivation of Cyclin B:Cdk1 complex; TP53 Regulates Metabolic Genes; Regulation of localization of FOXO transcription factors; Activation of BAD and translocation to mitochondria ; RHO GTPases activate PKNs	8	1
High	P63101	14-3-3 protein zeta/delta OS=Mus musculus OX=10090 GN=Ywhaz PE=1 SV=1	0	148.784	65	21	154	17	245	27.8	4.79	305.09	21	Pf00244	22631	ENSMUSG00000022285	Ywhaz	mmu:22631; P35215; P63101; P70197; P97286; Q3TSF1; Q5EBQ1	IL-5 Signaling Pathway; TNF-alpha NF-kB Signaling Pathway; IL-3 Signaling Pathway; Myometrial Relaxation and Contraction Pathways; Alpha6-Beta4 Integrin Signaling Pathway; Calcium Regulation in the Cardiac Cell	TP53 Regulates Metabolic Genes; GP1b-IX-V activation signalling; Interleukin-3, Interleukin-5 and GM-CSF signaling; Activation of BAD and translocation to mitochondria ; RHO GTPases activate PKNs; Chk1/Chk2(Cds1) mediated inactivation of Cyclin B:Cdk1 complex; Rap1 signalling; Deactivation of the beta-catenin transactivating complex; Regulation of localization of FOXO transcription factors; NOTCH…	17	4
High	P58871	182 kDa tankyrase-1-binding protein OS=Mus musculus OX=10090 GN=Tnks1bp1 PE=1 SV=2	0	121.924	28	33	60	33	1720	181.7	4.88	138.7	33	Pf15327	228140	ENSMUSG00000033955	Tnks1bp1	A2BH84; mmu:228140; P58871; Q6ZPI8		Deadenylation of mRNA; TP53 regulates transcription of additional cell cycle genes whose exact role in the p53 pathway remain uncertain	2	0
High	P16330	2',3'-cyclic-nucleotide 3'-phosphodiesterase OS=Mus musculus OX=10090 GN=Cnp PE=1 SV=3	0	123.903	64	32	94	30	420	47.1	8.97	198.81	32	Pf05881, Pf13671	12799	ENSMUSG00000006782	Cnp	mmu:12799; P16330; Q61424; Q8C7C9; Q91V42; Q923F3			0	2
Medium	Q3TIU4	2',5'-phosphodiesterase 12 OS=Mus musculus OX=10090 GN=Pde12 PE=1 SV=2	0.018	2.329	5	2	3	2	608	67.5	6.92	4.4	2		211948	ENSMUSG00000043702; ENSMUSG00000116251	Pde12	mmu:211948; Q3TIU4; Q3TTY4; Q6P2L5; Q8BKH8; Q8BTS8; Q8BUQ5		OAS antiviral response	1	0
High	Q9CR25	2-(3-amino-3-carboxypropyl)histidine synthase subunit 2 OS=Mus musculus OX=10090 GN=Dph2 PE=1 SV=1	0.002	4.914	6	2	2	2	489	52.3	5.53	3.98	2	Pf01866	67728	ENSMUSG00000028540	Dph2	mmu:67728; Q8K0L8; Q9CR25		Synthesis of diphthamide-EEF2	1	0
Low	Q05921	2-5A-dependent ribonuclease OS=Mus musculus OX=10090 GN=Rnasel PE=1 SV=2	0.172	0.933	3	1	1	1	735	83.2	6.55	0	1	Pf00023, Pf00069, Pf06479	24014	ENSMUSG00000066800	Rnasel	mmu:24014; Q05921; Q9ERU7	mRNA processing	Interferon alpha/beta signaling; OAS antiviral response	3	0
High	Q6PDY2	2-aminoethanethiol dioxygenase OS=Mus musculus OX=10090 GN=Ado PE=1 SV=2	0	19.158	35	6	16	6	256	28.4	5.97	33.99	6	Pf07847	211488	ENSMUSG00000057134; ENSMUSG00000116486	Ado	mmu:211488; Q3U2E1; Q6PDY2		Degradation of cysteine and homocysteine	1	0
Medium	Q64676	2-hydroxyacylsphingosine 1-beta-galactosyltransferase OS=Mus musculus OX=10090 GN=Ugt8 PE=1 SV=2	0.011	2.761	1	1	2	1	541	61.2	9.42	5.53	1	Pf00201	22239	ENSMUSG00000032854	Ugt8	mmu:22239; Q61634; Q64676; Q91W57	Sphingolipid Metabolism (general overview); Sphingolipid Metabolism (integrated pathway)	Glycosphingolipid metabolism	3	0
High	Q60597	2-oxoglutarate dehydrogenase, mitochondrial OS=Mus musculus OX=10090 GN=Ogdh PE=1 SV=3	0	49.401	18	15	29	15	1023	116.4	6.83	58.17	15	Pf00676, Pf02779, Pf16078, Pf16870	18293	ENSMUSG00000020456	Ogdh	mmu:18293; Q3UDM7; Q5DTI4; Q5SVX7; Q5SVX9; Q60597; Q6PFZ2; Q80Y57; Q8K0K7; Q8K2Z3; Q8R3M2; Q91WP2	TCA Cycle; Amino Acid metabolism; Tryptophan metabolism	Glyoxylate metabolism and glycine degradation; Lysine catabolism; Citric acid cycle (TCA cycle)	6	0
High	Q3TXS7	26S proteasome non-ATPase regulatory subunit 1 OS=Mus musculus OX=10090 GN=Psmd1 PE=1 SV=1	0	22.186	14	10	14	10	953	105.7	5.39	14.98	10	Pf01851, Pf13646, Pf18004	70247	ENSMUSG00000026229	Psmd1	B2RRP8; mmu:70247; Q3TXS7	TNF-alpha NF-kB Signaling Pathway	Separation of Sister Chromatids; The role of GTSE1 in G2/M progression after G2 checkpoint; Neddylation; Neutrophil degranulation; Antigen processing: Ubiquitination & Proteasome degradation; ABC-family proteins mediated transport; Downstream TCR signaling; FCERI mediated NF-kB activation; Asymmetric localization of PCP proteins; Degradation of AXIN; Hedgehog 'on' state; Ub-specific processing pr…	49	0
High	Q8BG32	26S proteasome non-ATPase regulatory subunit 11 OS=Mus musculus OX=10090 GN=Psmd11 PE=1 SV=3	0	29.534	26	10	17	10	422	47.4	6.48	29.06	10	Pf01399, Pf18055, Pf18503	69077	ENSMUSG00000017428	Psmd11	mmu:69077; Q8BG32	Proteasome Degradation	Ub-specific processing proteases; UCH proteinases; Neutrophil degranulation; Downstream TCR signaling; FCERI mediated NF-kB activation; Neddylation; Asymmetric localization of PCP proteins; Degradation of AXIN; Hedgehog 'on' state; Regulation of RUNX3 expression and activity; Antigen processing: Ubiquitination & Proteasome degradation; Autodegradation of Cdh1 by Cdh1:APC/C; APC/C:Cdc20 mediated d…	49	0
High	Q9D8W5	26S proteasome non-ATPase regulatory subunit 12 OS=Mus musculus OX=10090 GN=Psmd12 PE=1 SV=4	0	7.908	7	2	3	2	456	52.9	7.06	9.51	2	Pf01399, Pf18098	66997	ENSMUSG00000020720	Psmd12	mmu:66997; Q9CQT4; Q9CYB3; Q9D8W5	TNF-alpha NF-kB Signaling Pathway; Proteasome Degradation	Neddylation; Separation of Sister Chromatids; Antigen processing: Ubiquitination & Proteasome degradation; Neutrophil degranulation; Regulation of PTEN stability and activity; Cdc20:Phospho-APC/C mediated degradation of Cyclin A; The role of GTSE1 in G2/M progression after G2 checkpoint; MAPK6/MAPK4 signaling; Regulation of RAS by GAPs; Downstream TCR signaling; Orc1 removal from chromatin; Autod…	50	0
High	Q9WVJ2	26S proteasome non-ATPase regulatory subunit 13 OS=Mus musculus OX=10090 GN=Psmd13 PE=1 SV=1	0	16.385	16	7	13	7	376	42.8	5.71	19.74	7	Pf01399	23997	ENSMUSG00000025487	Psmd13	mmu:23997; Q3TB19; Q3TR74; Q542R0; Q9WVJ2	TNF-alpha NF-kB Signaling Pathway; Proteasome Degradation	Separation of Sister Chromatids; The role of GTSE1 in G2/M progression after G2 checkpoint; Neddylation; Neutrophil degranulation; Antigen processing: Ubiquitination & Proteasome degradation; ABC-family proteins mediated transport; Downstream TCR signaling; FCERI mediated NF-kB activation; Asymmetric localization of PCP proteins; Degradation of AXIN; Hedgehog 'on' state; Ub-specific processing pr…	50	0
High	O35593	26S proteasome non-ATPase regulatory subunit 14 OS=Mus musculus OX=10090 GN=Psmd14 PE=1 SV=2	0.002	4.967	9	3	3	3	310	34.6	6.52	2.59	3	Pf01398	59029	ENSMUSG00000026914	Psmd14	mmu:59029; O35593; Q3UB50; Q9CZY6		Separation of Sister Chromatids; The role of GTSE1 in G2/M progression after G2 checkpoint; Neddylation; Neutrophil degranulation; Antigen processing: Ubiquitination & Proteasome degradation; ABC-family proteins mediated transport; Downstream TCR signaling; FCERI mediated NF-kB activation; Asymmetric localization of PCP proteins; Degradation of AXIN; Hedgehog 'on' state; Ub-specific processing pr…	49	0
High	Q8VDM4	26S proteasome non-ATPase regulatory subunit 2 OS=Mus musculus OX=10090 GN=Psmd2 PE=1 SV=1	0	30.735	13	11	16	11	908	100.1	5.17	33.83	11	Pf01851, Pf18051	21762	ENSMUSG00000006998	Psmd2	mmu:21762; Q8VDM4	Proteasome Degradation	Separation of Sister Chromatids; The role of GTSE1 in G2/M progression after G2 checkpoint; Neddylation; Neutrophil degranulation; Antigen processing: Ubiquitination & Proteasome degradation; ABC-family proteins mediated transport; Downstream TCR signaling; FCERI mediated NF-kB activation; Asymmetric localization of PCP proteins; Degradation of AXIN; Hedgehog 'on' state; Ub-specific processing pr…	49	0
High	P14685	26S proteasome non-ATPase regulatory subunit 3 OS=Mus musculus OX=10090 GN=Psmd3 PE=1 SV=3	0	46.873	27	15	27	15	530	60.7	8.44	58.82	15	Pf01399, Pf08375	22123	ENSMUSG00000017221	Psmd3	mmu:22123; P14685; Q3TP95; Q99LL7	TNF-alpha NF-kB Signaling Pathway; Proteasome Degradation	Separation of Sister Chromatids; The role of GTSE1 in G2/M progression after G2 checkpoint; Neddylation; Neutrophil degranulation; Antigen processing: Ubiquitination & Proteasome degradation; ABC-family proteins mediated transport; Downstream TCR signaling; FCERI mediated NF-kB activation; Asymmetric localization of PCP proteins; Degradation of AXIN; Hedgehog 'on' state; Ub-specific processing pr…	50	0
High	O35226	26S proteasome non-ATPase regulatory subunit 4 OS=Mus musculus OX=10090 GN=Psmd4 PE=1 SV=1	0	28.883	30	7	11	7	376	40.7	4.79	37.82	7	Pf13519	19185	ENSMUSG00000005625	Psmd4	mmu:19185; O35226; Q91V59; Q9JJM0; Q9JJM1; Q9JJM2; Q9JJM3	Id Signaling Pathway; Proteasome Degradation	Ub-specific processing proteases; UCH proteinases; Downstream TCR signaling; FCERI mediated NF-kB activation; Neddylation; Asymmetric localization of PCP proteins; Degradation of AXIN; Hedgehog 'on' state; Regulation of RUNX3 expression and activity; Antigen processing: Ubiquitination & Proteasome degradation; Autodegradation of Cdh1 by Cdh1:APC/C; APC/C:Cdc20 mediated degradation of Securin; APC…	49	0
High	Q8BJY1	26S proteasome non-ATPase regulatory subunit 5 OS=Mus musculus OX=10090 GN=Psmd5 PE=1 SV=4	0	25.895	23	9	17	9	504	55.9	5.21	30.36	9		66998	ENSMUSG00000026869	Psmd5	A2AUB0; mmu:66998; Q3UFV2; Q5DU49; Q8BJY1; Q8BMA9; Q8VEE9	Proteasome Degradation	Separation of Sister Chromatids; The role of GTSE1 in G2/M progression after G2 checkpoint; Neddylation; Antigen processing: Ubiquitination & Proteasome degradation; ABC-family proteins mediated transport; Downstream TCR signaling; FCERI mediated NF-kB activation; Asymmetric localization of PCP proteins; Degradation of AXIN; Hedgehog 'on' state; Ub-specific processing proteases; Regulation of RUN…	48	0
High	Q99JI4	26S proteasome non-ATPase regulatory subunit 6 OS=Mus musculus OX=10090 GN=Psmd6 PE=1 SV=1	0	20.258	19	8	11	8	389	45.5	5.52	23.53	8	Pf01399	66413	ENSMUSG00000021737	Psmd6	mmu:66413; Q99JI4; Q9CWZ1	TNF-alpha NF-kB Signaling Pathway; Proteasome Degradation	Separation of Sister Chromatids; The role of GTSE1 in G2/M progression after G2 checkpoint; Neddylation; Neutrophil degranulation; Antigen processing: Ubiquitination & Proteasome degradation; ABC-family proteins mediated transport; Downstream TCR signaling; FCERI mediated NF-kB activation; Asymmetric localization of PCP proteins; Degradation of AXIN; Hedgehog 'on' state; Ub-specific processing pr…	50	0
Low	P26516	26S proteasome non-ATPase regulatory subunit 7 OS=Mus musculus OX=10090 GN=Psmd7 PE=1 SV=2	0.069	1.548	2	1	1	1	321	36.5	6.77	0	1	Pf01398	17463	ENSMUSG00000039067	Psmd7	mmu:17463; P26516; Q3TW61; Q8C0I8	TNF-alpha NF-kB Signaling Pathway; Proteasome Degradation	Separation of Sister Chromatids; The role of GTSE1 in G2/M progression after G2 checkpoint; Neddylation; Neutrophil degranulation; Antigen processing: Ubiquitination & Proteasome degradation; ABC-family proteins mediated transport; Downstream TCR signaling; FCERI mediated NF-kB activation; Asymmetric localization of PCP proteins; Degradation of AXIN; Hedgehog 'on' state; Ub-specific processing pr…	50	0
Medium	Q9CX56	26S proteasome non-ATPase regulatory subunit 8 OS=Mus musculus OX=10090 GN=Psmd8 PE=1 SV=2	0.01	2.828	4	2	3	2	353	39.9	9.58	3.99	2	Pf10075	57296	ENSMUSG00000030591	Psmd8	mmu:57296; Q9CX56	Proteasome Degradation	Ub-specific processing proteases; UCH proteinases; Downstream TCR signaling; FCERI mediated NF-kB activation; Neddylation; Asymmetric localization of PCP proteins; Degradation of AXIN; Hedgehog 'on' state; Regulation of RUNX3 expression and activity; Antigen processing: Ubiquitination & Proteasome degradation; Autodegradation of Cdh1 by Cdh1:APC/C; APC/C:Cdc20 mediated degradation of Securin; APC…	48	0
High	Q9CR00	26S proteasome non-ATPase regulatory subunit 9 OS=Mus musculus OX=10090 GN=Psmd9 PE=1 SV=1	0	16.469	21	4	6	4	222	24.7	6.43	8.94	4	Pf17820, Pf18265	67151	ENSMUSG00000029440	Psmd9	mmu:67151; Q3TG66; Q9CR00	Proteasome Degradation	Neddylation; Separation of Sister Chromatids; Antigen processing: Ubiquitination & Proteasome degradation; Regulation of PTEN stability and activity; Cdc20:Phospho-APC/C mediated degradation of Cyclin A; The role of GTSE1 in G2/M progression after G2 checkpoint; MAPK6/MAPK4 signaling; Regulation of RAS by GAPs; Downstream TCR signaling; Orc1 removal from chromatin; Autodegradation of Cdh1 by Cdh1…	48	0
High	P62334	26S proteasome regulatory subunit 10B OS=Mus musculus OX=10090 GN=Psmc6 PE=1 SV=1	0	21.723	25	9	11	9	389	44.1	7.49	15.18	9	Pf00004	67089	ENSMUSG00000021832	Psmc6	mmu:67089; P49719; P62334; Q3TKK1; Q810A6; Q92524; Q9CXH9	Proteasome Degradation	Asymmetric localization of PCP proteins; Degradation of AXIN; Hedgehog 'on' state; Ub-specific processing proteases; Regulation of RUNX3 expression and activity; Antigen processing: Ubiquitination & Proteasome degradation; Autodegradation of Cdh1 by Cdh1:APC/C; APC/C:Cdc20 mediated degradation of Securin; APC/C:Cdh1 mediated degradation of Cdc20 and other APC/C:Cdh1 targeted proteins in late mito…	48	0
High	P62192	26S proteasome regulatory subunit 4 OS=Mus musculus OX=10090 GN=Psmc1 PE=1 SV=1	0	36.481	23	9	19	8	440	49.2	6.21	46.88	9	Pf00004	19179	ENSMUSG00000021178	Psmc1	mmu:19179; P49014; P62192; Q03527; Q96AZ3	TNF-alpha NF-kB Signaling Pathway; Proteasome Degradation	Regulation of RAS by GAPs; Downstream TCR signaling; FCERI mediated NF-kB activation; Neddylation; Asymmetric localization of PCP proteins; Degradation of AXIN; Hedgehog 'on' state; Ub-specific processing proteases; Regulation of RUNX3 expression and activity; Antigen processing: Ubiquitination & Proteasome degradation; Autodegradation of Cdh1 by Cdh1:APC/C; APC/C:Cdc20 mediated degradation of Se…	50	1
High	O88685	26S proteasome regulatory subunit 6A OS=Mus musculus OX=10090 GN=Psmc3 PE=1 SV=2	0	19.953	30	11	18	11	442	49.5	5.19	19.56	11	Pf00004, Pf16450	19182	ENSMUSG00000002102	Psmc3	mmu:19182; O88685; Q99JN8	TNF-alpha NF-kB Signaling Pathway; Proteasome Degradation	Separation of Sister Chromatids; The role of GTSE1 in G2/M progression after G2 checkpoint; Neddylation; Neutrophil degranulation; Antigen processing: Ubiquitination & Proteasome degradation; ABC-family proteins mediated transport; Downstream TCR signaling; FCERI mediated NF-kB activation; Asymmetric localization of PCP proteins; Degradation of AXIN; Hedgehog 'on' state; Ub-specific processing pr…	50	0
High	P54775	26S proteasome regulatory subunit 6B OS=Mus musculus OX=10090 GN=Psmc4 PE=1 SV=2	0	16.402	20	8	11	8	418	47.4	5.21	15.68	8	Pf00004	23996	ENSMUSG00000030603	Psmc4	mmu:23996; P54775; Q6ZWN9	Proteasome Degradation	Antigen processing: Ubiquitination & Proteasome degradation; Ub-specific processing proteases; Downstream TCR signaling; FCERI mediated NF-kB activation; Neddylation; Asymmetric localization of PCP proteins; Degradation of AXIN; Hedgehog 'on' state; Regulation of RUNX3 expression and activity; Autodegradation of Cdh1 by Cdh1:APC/C; APC/C:Cdc20 mediated degradation of Securin; APC/C:Cdh1 mediated …	48	0
High	P46471	26S proteasome regulatory subunit 7 OS=Mus musculus OX=10090 GN=Psmc2 PE=1 SV=5	0	81.403	45	21	45	21	433	48.6	5.95	92.18	21	Pf00004	19181	ENSMUSG00000028932	Psmc2	mmu:19181; O08531; P46471; Q3TGX5; Q9DBA1	TNF-alpha NF-kB Signaling Pathway; Proteasome Degradation	Ub-specific processing proteases; Antigen processing: Ubiquitination & Proteasome degradation; Neutrophil degranulation; Downstream TCR signaling; FCERI mediated NF-kB activation; Neddylation; Asymmetric localization of PCP proteins; Degradation of AXIN; Hedgehog 'on' state; Regulation of RUNX3 expression and activity; Autodegradation of Cdh1 by Cdh1:APC/C; APC/C:Cdc20 mediated degradation of Sec…	50	0
High	P62196	26S proteasome regulatory subunit 8 OS=Mus musculus OX=10090 GN=Psmc5 PE=1 SV=1	0	26.021	19	7	15	6	406	45.6	7.55	27.63	7	Pf00004	19184	ENSMUSG00000020708	Psmc5	mmu:19184; O35051; P47210; P52915; P52916; P62196; Q3UL51; Q9CWN5	Proteasome Degradation	Regulation of RAS by GAPs; Downstream TCR signaling; FCERI mediated NF-kB activation; Neddylation; Asymmetric localization of PCP proteins; Degradation of AXIN; Hedgehog 'on' state; Ub-specific processing proteases; Regulation of RUNX3 expression and activity; Antigen processing: Ubiquitination & Proteasome degradation; Autodegradation of Cdh1 by Cdh1:APC/C; APC/C:Cdc20 mediated degradation of Se…	48	0
High	Q3UHX2	28 kDa heat- and acid-stable phosphoprotein OS=Mus musculus OX=10090 GN=Pdap1 PE=1 SV=1	0	53.057	38	10	23	10	181	20.6	7.39	62.91	10		231887	ENSMUSG00000029623	Pdap1	A0JLS1; mmu:231887; Q3KQJ5; Q3UHX2		Neutrophil degranulation	1	0
High	Q9CPX7	28S ribosomal protein S16, mitochondrial OS=Mus musculus OX=10090 GN=Mrps16 PE=1 SV=1	0.004	4.087	14	2	3	2	135	15.2	9.67	2.07	2	Pf00886	66242	ENSMUSG00000049960	Mrps16	mmu:66242; Q9CPX7		Mitochondrial translation elongation; Mitochondrial translation termination	2	0
High	Q99N84	28S ribosomal protein S18b, mitochondrial OS=Mus musculus OX=10090 GN=Mrps18b PE=1 SV=1	0	5.915	13	2	3	2	254	28.7	8.35	6.05	2	Pf01084	66973	ENSMUSG00000024436	Mrps18b	mmu:66973; Q3TLA9; Q99N84; Q9CRK0; Q9DCR8		Mitochondrial translation elongation; Mitochondrial translation termination	2	0
High	Q924T2	28S ribosomal protein S2, mitochondrial OS=Mus musculus OX=10090 GN=Mrps2 PE=1 SV=1	0	10.599	13	2	5	2	291	32.3	9.14	17.99	2		118451	ENSMUSG00000035772	Mrps2	A2AK29; mmu:118451; Q3TMF8; Q924T2		Mitochondrial translation elongation; Mitochondrial translation termination	2	0
High	Q8VE22	28S ribosomal protein S23, mitochondrial OS=Mus musculus OX=10090 GN=Mrps23 PE=1 SV=1	0	7.008	27	3	3	3	177	20.3	8.59	6.67	3		64656	ENSMUSG00000023723; ENSMUSG00000098375	Mrps23	mmu:64656; Q8VE22; Q9CXH1		Mitochondrial translation elongation; Mitochondrial translation termination	2	0
Low	Q9CQV5	28S ribosomal protein S24, mitochondrial OS=Mus musculus OX=10090 GN=Mrps24 PE=1 SV=1	0.15	1.01	10	1	1	1	167	18.9	9.76	0	1	Pf14955	64660	ENSMUSG00000020477	Mrps24	mmu:64660; Q9CQV5		Mitochondrial translation elongation; Mitochondrial translation termination	2	0
High	Q80ZS3	28S ribosomal protein S26, mitochondrial OS=Mus musculus OX=10090 GN=Mrps26 PE=1 SV=1	0	15.177	20	3	7	3	200	23.4	9.96	12.54	3	Pf14943	99045	ENSMUSG00000037740	Mrps26	mmu:99045; Q80ZS3		Mitochondrial translation elongation; Mitochondrial translation termination	2	0
Medium	Q8BK72	28S ribosomal protein S27, mitochondrial OS=Mus musculus OX=10090 GN=Mrps27 PE=1 SV=2	0.018	2.387	3	1	1	1	415	47.7	5.5	2.26	1		218506	ENSMUSG00000041632	Mrps27	E9QKZ5; mmu:218506; Q8BK72		Mitochondrial translation elongation; Mitochondrial translation termination	2	0
High	Q9D0G0	28S ribosomal protein S30, mitochondrial OS=Mus musculus OX=10090 GN=Mrps30 PE=1 SV=1	0	5.905	5	2	3	2	442	49.9	9.38	2.28	2	Pf07147	59054	ENSMUSG00000021731	Mrps30	B2KF79; mmu:59054; Q3U9U4; Q9CYS8; Q9D0G0; Q9JJQ2		Mitochondrial translation elongation; Mitochondrial translation termination	2	0
Low	Q61733	28S ribosomal protein S31, mitochondrial OS=Mus musculus OX=10090 GN=Mrps31 PE=1 SV=1	0.127	1.107	2	1	2	1	384	43.9	8.51	2.3	1	Pf15433	57312	ENSMUSG00000031533	Mrps31	mmu:57312; Q3TSP5; Q61733; Q8VEH4; Q9D045		Mitochondrial translation elongation; Mitochondrial translation termination	2	0
High	Q9D2R8	28S ribosomal protein S33, mitochondrial OS=Mus musculus OX=10090 GN=Mrps33 PE=1 SV=1	0.009	3.413	11	1	1	1	106	12.5	10.26	2.28	1		14548	ENSMUSG00000029918	Mrps33	mmu:14548; O88743; Q9D2R8		Mitochondrial translation elongation; Mitochondrial translation termination	2	0
High	Q9CQX8	28S ribosomal protein S36, mitochondrial OS=Mus musculus OX=10090 GN=Mrps36 PE=1 SV=1	0	8.996	44	2	7	2	102	11.1	9.99	16.1	2	Pf10937	66128	ENSMUSG00000061474	Mrps36	mmu:66128; Q4VA25; Q9CQX8		Mitochondrial translation elongation; Mitochondrial translation termination	2	0
High	P58064	28S ribosomal protein S6, mitochondrial OS=Mus musculus OX=10090 GN=Mrps6 PE=1 SV=3	0.009	3.381	17	2	3	2	125	14.3	9.5	5.86	2	Pf01250	121022	ENSMUSG00000039680	Mrps6	mmu:121022; P58064		Mitochondrial translation elongation; Mitochondrial translation termination	2	0
High	Q80X85	28S ribosomal protein S7, mitochondrial OS=Mus musculus OX=10090 GN=Mrps7 PE=1 SV=1	0	5.898	7	1	1	1	242	28	9.94	2.93	1		50529	ENSMUSG00000046756	Mrps7	mmu:50529; Q3TSI9; Q80X85; Q9CV71		Mitochondrial translation elongation; Mitochondrial translation termination	2	0
High	Q9Z0S1	3'(2'),5'-bisphosphate nucleotidase 1 OS=Mus musculus OX=10090 GN=Bpnt1 PE=1 SV=2	0	24.691	25	6	12	6	308	33.2	5.82	24.86	6	Pf00459	23827	ENSMUSG00000026617	Bpnt1	mmu:23827; Q3U8Z5; Q91XB9; Q9D7Y0; Q9Z0S1		Cytosolic sulfonation of small molecules	1	0
Low	Q7TMF2	3'-5' exoribonuclease 1 OS=Mus musculus OX=10090 GN=Eri1 PE=1 SV=2	0.256	0.721	4	1	1	1	345	39.5	8.31	0	1	Pf00929, Pf02037	67276		Eri1	mmu:67276; Q3TA98; Q3TNT0; Q7TMF2; Q80UN4; Q8BWR6; Q9CQ63		Major pathway of rRNA processing in the nucleolus and cytosol	1	0
High	B2RR83	3'-5' RNA helicase YTHDC2 OS=Mus musculus OX=10090 GN=Ythdc2 PE=1 SV=1	0	9.561	3	3	5	3	1445	161	8.51	10.12	3	Pf00271, Pf04408, Pf07717	240255	ENSMUSG00000034653	Ythdc2	B2RR83; mmu:240255			0	0
High	O08756	3-hydroxyacyl-CoA dehydrogenase type-2 OS=Mus musculus OX=10090 GN=Hsd17b10 PE=1 SV=4	0	9.894	23	4	7	4	261	27.4	8.41	13.12	4	Pf00106			Hsd17b10	O08756		Branched-chain amino acid catabolism	1	0
High	Q99L13	3-hydroxyisobutyrate dehydrogenase, mitochondrial OS=Mus musculus OX=10090 GN=Hibadh PE=1 SV=1	0	7.691	9	2	2	2	335	35.4	8.13	2.69	2	Pf03446	58875	ENSMUSG00000029776	Hibadh	mmu:58875; Q8BJY2; Q99L13		Branched-chain amino acid catabolism	1	0
High	Q8QZS1	3-hydroxyisobutyryl-CoA hydrolase, mitochondrial OS=Mus musculus OX=10090 GN=Hibch PE=1 SV=1	0.003	4.418	5	2	2	2	385	43	8.06	2.17	2	Pf16113	227095	ENSMUSG00000041426	Hibch	mmu:227095; Q8QZS1		Branched-chain amino acid catabolism	1	0
High	Q8VCH0	3-ketoacyl-CoA thiolase B, peroxisomal OS=Mus musculus OX=10090 GN=Acaa1b PE=1 SV=1	0	8.312	9	2	3	2	424	44	8.51	7.79	2	Pf00108, Pf02803	235674	ENSMUSG00000010651	Acaa1b	mmu:235674; Q8VCH0	PPAR signaling pathway	Neutrophil degranulation; Peroxisomal protein import; alpha-linolenic acid (ALA) metabolism; Beta-oxidation of very long chain fatty acids	5	0
High	Q8BWT1	3-ketoacyl-CoA thiolase, mitochondrial OS=Mus musculus OX=10090 GN=Acaa2 PE=1 SV=3	0	23.149	30	6	13	6	397	41.8	8.09	34.32	6	Pf00108, Pf02803	52538	ENSMUSG00000036880	Acaa2	mmu:52538; Q3TIT9; Q8BWT1; Q8JZR8	Fatty Acid Biosynthesis	Mitochondrial Fatty Acid Beta-Oxidation	2	0
High	Q99J99	3-mercaptopyruvate sulfurtransferase OS=Mus musculus OX=10090 GN=Mpst PE=1 SV=4	0	8.146	8	2	6	2	297	33.1	6.47	17.79	2	Pf00581	246221	ENSMUSG00000071711	Mpst	mmu:246221; Q3UW66; Q505N7; Q99J99		Degradation of cysteine and homocysteine	1	0
High	Q9Z2A0	3-phosphoinositide-dependent protein kinase 1 OS=Mus musculus OX=10090 GN=Pdpk1 PE=1 SV=2	0	13.695	14	7	10	7	559	63.7	7.37	12.02	7	Pf00069	18607	ENSMUSG00000024122	Pdpk1	A6H6U3; mmu:18607; Q9R1D8; Q9R215; Q9Z2A0	MicroRNAs in Cardiomyocyte Hypertrophy; PPAR signaling pathway; Focal Adhesion-PI3K-Akt-mTOR-signaling pathway; Leptin Insulin Overlap; Integrin-mediated Cell Adhesion; Insulin Signaling; Focal Adhesion	Downstream TCR signaling; FCERI mediated NF-kB activation; CLEC7A (Dectin-1) signaling; RHO GTPases activate PKNs; PIP3 activates AKT signaling; Role of LAT2/NTAL/LAB on calcium mobilization; GPVI-mediated activation cascade; CD28 dependent PI3K/Akt signaling; VEGFR2 mediated vascular permeability; G beta:gamma signalling through PI3Kgamma; VEGFR2 mediated cell proliferation; Integrin signaling; …	22	0
Low	Q99N96	39S ribosomal protein L1, mitochondrial OS=Mus musculus OX=10090 GN=Mrpl1 PE=1 SV=2	0.197	0.862	4	1	1	1	336	37.6	8.72	0	1		94061	ENSMUSG00000029486	Mrpl1	mmu:94061; Q3UQP5; Q8K351; Q99N96; Q9CWW4		Mitochondrial translation elongation; Mitochondrial translation termination	2	0
High	Q3TBW2	39S ribosomal protein L10, mitochondrial OS=Mus musculus OX=10090 GN=Mrpl10 PE=1 SV=2	0.007	3.547	13	2	2	2	262	29.4	9.69	4.82	2		107732	ENSMUSG00000001445	Mrpl10	mmu:107732; Q3TBW2; Q9CQD2		Mitochondrial translation elongation; Mitochondrial translation termination	2	0
High	Q9CQF0	39S ribosomal protein L11, mitochondrial OS=Mus musculus OX=10090 GN=Mrpl11 PE=1 SV=1	0	8.129	17	3	6	3	192	20.7	9.73	12.21	3		66419	ENSMUSG00000024902	Mrpl11	mmu:66419; Q3TJX7; Q9CQF0	mRNA processing	Mitochondrial translation elongation; Mitochondrial translation termination	3	0
High	Q9DB15	39S ribosomal protein L12, mitochondrial OS=Mus musculus OX=10090 GN=Mrpl12 PE=1 SV=2	0.001	5.727	11	2	4	2	201	21.7	9.29	6.5	2		56282	ENSMUSG00000039640	Mrpl12	B1ATZ3; mmu:56282; Q3TKJ3; Q99JS8; Q9DB15		Mitochondrial translation elongation; Mitochondrial translation termination	2	0
High	Q9D1P0	39S ribosomal protein L13, mitochondrial OS=Mus musculus OX=10090 GN=Mrpl13 PE=1 SV=1	0.005	3.808	13	2	2	2	178	20.7	9.35	5.32	2		68537	ENSMUSG00000022370	Mrpl13	mmu:68537; Q9D1P0		Mitochondrial translation elongation; Mitochondrial translation termination	2	0
High	Q9D1I6	39S ribosomal protein L14, mitochondrial OS=Mus musculus OX=10090 GN=Mrpl14 PE=1 SV=1	0	7.16	19	2	2	2	145	15.9	10.99	5.46	2	Pf00238	68463	ENSMUSG00000023939	Mrpl14	mmu:68463; Q3UNL3; Q9D1I6		Mitochondrial translation elongation; Mitochondrial translation termination	2	0
Medium	Q9CPR5	39S ribosomal protein L15, mitochondrial OS=Mus musculus OX=10090 GN=Mrpl15 PE=1 SV=1	0.032	2.029	9	2	3	2	295	33.5	10.07	2.23	2	Pf00828	27395	ENSMUSG00000033845	Mrpl15	mmu:27395; Q3UBN5; Q9CPP5; Q9CPR5; Q9CRH4		Mitochondrial translation elongation; Mitochondrial translation termination	2	0
Low	Q9D8P4	39S ribosomal protein L17, mitochondrial OS=Mus musculus OX=10090 GN=Mrpl17 PE=1 SV=1	0.127	1.118	4	1	1	1	176	20.2	9.82	1.93	1	Pf01196	27397	ENSMUSG00000030879	Mrpl17	mmu:27397; Q91VR0; Q9D8P4		Mitochondrial translation elongation; Mitochondrial translation termination	2	0
Low	Q9CQL5	39S ribosomal protein L18, mitochondrial OS=Mus musculus OX=10090 GN=Mrpl18 PE=1 SV=1	0.168	0.95	3	1	1	1	180	20.7	9.28	0	1	Pf00861	67681	ENSMUSG00000057388	Mrpl18	mmu:67681; Q9CQL5; Q9D6N7		Mitochondrial translation elongation; Mitochondrial translation termination	2	0
High	Q9D773	39S ribosomal protein L2, mitochondrial OS=Mus musculus OX=10090 GN=Mrpl2 PE=1 SV=1	0.003	4.687	11	3	3	3	306	33.3	11.06	0	3	Pf03947	27398	ENSMUSG00000002767	Mrpl2	mmu:27398; Q9D773		Mitochondrial translation elongation; Mitochondrial translation termination	2	0
Medium	Q9CQL4	39S ribosomal protein L20, mitochondrial OS=Mus musculus OX=10090 GN=Mrpl20 PE=1 SV=1	0.014	2.551	5	1	2	1	149	17.6	11.11	4.42	1	Pf00453	66448	ENSMUSG00000029066	Mrpl20	mmu:66448; Q9CQL4; Q9D5L3		Mitochondrial translation elongation; Mitochondrial translation termination	2	0
Low	Q9D1N9	39S ribosomal protein L21, mitochondrial OS=Mus musculus OX=10090 GN=Mrpl21 PE=1 SV=1	0.115	1.185	10	1	1	1	209	23.4	9.99	0	1	Pf00829	353242	ENSMUSG00000024829	Mrpl21	mmu:353242; Q9CSH9; Q9D1N9; Q9D214		Mitochondrial translation elongation; Mitochondrial translation termination	2	0
Medium	Q8BU88	39S ribosomal protein L22, mitochondrial OS=Mus musculus OX=10090 GN=Mrpl22 PE=1 SV=1	0.018	2.348	6	1	1	1	206	23.8	9.86	2.67	1		216767	ENSMUSG00000020514	Mrpl22	mmu:216767; Q8BK04; Q8BU88		Mitochondrial translation elongation; Mitochondrial translation termination	2	0
High	O35972	39S ribosomal protein L23, mitochondrial OS=Mus musculus OX=10090 GN=Mrpl23 PE=1 SV=1	0.005	3.822	9	1	2	1	146	17.1	9.76	6.53	1		19935	ENSMUSG00000037772	Mrpl23	mmu:19935; O35972; Q78E46	mRNA processing	Mitochondrial translation elongation; Mitochondrial translation termination	3	0
Low	Q9CQ06	39S ribosomal protein L24, mitochondrial OS=Mus musculus OX=10090 GN=Mrpl24 PE=1 SV=1	0.146	1.031	11	1	1	1	216	24.9	9.5	2.2	1	Pf00467	67707	ENSMUSG00000019710	Mrpl24	mmu:67707; Q9CQ06; Q9CX51; Q9D1L7; Q9D7R6		Mitochondrial translation elongation; Mitochondrial translation termination	2	0
Medium	Q99N92	39S ribosomal protein L27, mitochondrial OS=Mus musculus OX=10090 GN=Mrpl27 PE=1 SV=1	0.022	2.237	11	2	2	2	148	15.9	10.17	0	2	Pf01016	94064	ENSMUSG00000024414	Mrpl27	mmu:94064; Q99N92		Mitochondrial translation elongation; Mitochondrial translation termination	2	0
Medium	Q9D1B9	39S ribosomal protein L28, mitochondrial OS=Mus musculus OX=10090 GN=Mrpl28 PE=1 SV=3	0.018	2.342	4	1	2	1	257	30.2	9.29	0	1	Pf00830	68611	ENSMUSG00000024181	Mrpl28	A6H5Y0; mmu:68611; Q3TR04; Q497Y8; Q66JU7; Q9D1B9		Mitochondrial translation elongation; Mitochondrial translation termination	2	0
Low	Q9DCI9	39S ribosomal protein L32, mitochondrial OS=Mus musculus OX=10090 GN=Mrpl32 PE=1 SV=1	0.13	1.099	6	1	1	1	187	21.7	9.7	1.77	1	Pf01783	75398	ENSMUSG00000015672	Mrpl32	mmu:75398; Q91XR6; Q9DCI9		Mitochondrial translation elongation; Mitochondrial translation termination	2	0
High	Q921S7	39S ribosomal protein L37, mitochondrial OS=Mus musculus OX=10090 GN=Mrpl37 PE=1 SV=1	0	7.003	6	2	3	2	423	48.3	8.84	8.14	2	Pf07147	56280	ENSMUSG00000028622	Mrpl37	mmu:56280; Q921S7		Mitochondrial translation elongation; Mitochondrial translation termination	2	0
Low	Q8K2M0	39S ribosomal protein L38, mitochondrial OS=Mus musculus OX=10090 GN=Mrpl38 PE=1 SV=2	0.077	1.463	8	2	2	2	380	45	8.1	0	2		60441	ENSMUSG00000020775	Mrpl38	A2A869; mmu:60441; Q3TXY6; Q8BTZ1; Q8K2M0; Q99LM1		Mitochondrial translation elongation; Mitochondrial translation termination	2	0
High	Q9JKF7	39S ribosomal protein L39, mitochondrial OS=Mus musculus OX=10090 GN=Mrpl39 PE=1 SV=4	0	9.107	11	3	5	3	336	38.5	7.94	2.96	3		27393	ENSMUSG00000022889	Mrpl39	A6X954; mmu:27393; Q91YK5; Q9D8U5; Q9JKF7		Mitochondrial translation elongation; Mitochondrial translation termination	2	0
High	Q9DCU6	39S ribosomal protein L4, mitochondrial OS=Mus musculus OX=10090 GN=Mrpl4 PE=1 SV=1	0.009	3.394	6	2	2	2	294	33.1	9.82	1.69	2	Pf00573	66163	ENSMUSG00000003299	Mrpl4	mmu:66163; Q811L8; Q8JZU9; Q9DCU6; Q9JJB3		Mitochondrial translation elongation; Mitochondrial translation termination	2	0
Medium	Q9Z2Q5	39S ribosomal protein L40, mitochondrial OS=Mus musculus OX=10090 GN=Mrpl40 PE=1 SV=2	0.01	2.852	10	2	2	2	206	24.3	9.47	0	2	Pf09812	18100	ENSMUSG00000022706	Mrpl40	mmu:18100; Q9CS52; Q9Z2Q5		Mitochondrial translation elongation; Mitochondrial translation termination	2	0
High	Q9CQN7	39S ribosomal protein L41, mitochondrial OS=Mus musculus OX=10090 GN=Mrpl41 PE=1 SV=1	0.007	3.623	16	2	2	2	135	15.3	9.82	4.21	2	Pf09809	107733	ENSMUSG00000036850	Mrpl41	mmu:107733; Q8BJ44; Q9CQN7		Mitochondrial translation elongation; Mitochondrial translation termination	2	0
High	Q99N89	39S ribosomal protein L43, mitochondrial OS=Mus musculus OX=10090 GN=Mrpl43 PE=1 SV=1	0.007	3.574	6	1	2	1	183	20.2	9.52	5.52	1				Mrpl43	Q99N89		Mitochondrial translation elongation; Mitochondrial translation termination	2	0
Medium	Q9CY73	39S ribosomal protein L44, mitochondrial OS=Mus musculus OX=10090 GN=Mrpl44 PE=1 SV=3	0.01	2.863	6	1	1	1	333	37.5	8.51	3.06	1		69163	ENSMUSG00000026248	Mrpl44	mmu:69163; Q3U0J0; Q8VE61; Q9CY73		Mitochondrial translation elongation; Mitochondrial translation termination	2	0
High	Q8K2Y7	39S ribosomal protein L47, mitochondrial OS=Mus musculus OX=10090 GN=Mrpl47 PE=1 SV=2	0.007	3.546	4	1	2	1	252	29.7	10.21	5.63	1		74600	ENSMUSG00000037531	Mrpl47	mmu:74600; Q5I0U2; Q8CHZ6; Q8K2Y7		Mitochondrial translation elongation; Mitochondrial translation termination	2	0
Low	Q8JZS9	39S ribosomal protein L48, mitochondrial OS=Mus musculus OX=10090 GN=Mrpl48 PE=1 SV=1	0.254	0.726	3	1	1	1	211	23.9	9.44	0	1	Pf00338	52443		Mrpl48	mmu:52443; Q4VA35; Q8JZS9		Mitochondrial translation elongation; Mitochondrial translation termination	2	0
High	Q8VDT9	39S ribosomal protein L50, mitochondrial OS=Mus musculus OX=10090 GN=Mrpl50 PE=1 SV=2	0.004	4.16	11	1	2	1	159	18.2	9.33	6.03	1		28028	ENSMUSG00000044018	Mrpl50	mmu:28028; Q8VDT9; Q9CR44		Mitochondrial translation elongation; Mitochondrial translation termination	2	0
Low	Q99N94	39S ribosomal protein L9, mitochondrial OS=Mus musculus OX=10090 GN=Mrpl9 PE=1 SV=2	0.061	1.619	4	1	2	1	265	30.2	10.08	0	1	Pf01281	78523	ENSMUSG00000028140	Mrpl9	mmu:78523; Q3TSJ0; Q8BQZ2; Q99N94		Mitochondrial translation elongation; Mitochondrial translation termination	2	0
High	Q80YV4	4'-phosphopantetheine phosphatase OS=Mus musculus OX=10090 GN=Pank4 PE=1 SV=2	0	22.144	10	7	14	6	820	91.5	6.71	28.17	7	Pf01937	269614	ENSMUSG00000029056	Pank4	B1AZN5; B1AZN6; mmu:269614; Q7M751; Q80YV4; Q8BQE9		Coenzyme A biosynthesis	1	0
High	P61922	4-aminobutyrate aminotransferase, mitochondrial OS=Mus musculus OX=10090 GN=Abat PE=1 SV=1	0	83.448	44	17	40	17	500	56.4	8.09	107.13	17	Pf00202	268860	ENSMUSG00000057880	Abat	mmu:268860; P61922; Q8BZA3	Alanine and aspartate metabolism	Degradation of GABA	2	0
High	Q9JLJ2	4-trimethylaminobutyraldehyde dehydrogenase OS=Mus musculus OX=10090 GN=Aldh9a1 PE=1 SV=1	0	10.115	8	4	6	4	494	53.5	6.98	14.34	4	Pf00171	56752		Aldh9a1	mmu:56752; Q9JLJ2	Tryptophan metabolism	Carnitine synthesis	2	0
High	P63325	40S ribosomal protein S10 OS=Mus musculus OX=10090 GN=Rps10 PE=1 SV=1	0	18.459	48	8	14	7	165	18.9	10.15	23.32	8	Pf03501	67097	ENSMUSG00000052146	Rps10	mmu:67097; P09900; P63325; Q9DCR5	Cytoplasmic Ribosomal Proteins	L13a-mediated translational silencing of Ceruloplasmin expression; SRP-dependent cotranslational protein targeting to membrane; Major pathway of rRNA processing in the nucleolus and cytosol; Formation of a pool of free 40S subunits; GTP hydrolysis and joining of the 60S ribosomal subunit; Nonsense Mediated Decay (NMD) independent of the Exon Junction Complex (EJC); Nonsense Mediated Decay (NMD) e…	11	0
High	P62281	40S ribosomal protein S11 OS=Mus musculus OX=10090 GN=Rps11 PE=1 SV=3	0	31.403	32	7	15	7	158	18.4	10.3	32.89	7	Pf00366, Pf16205	27207	ENSMUSG00000003429	Rps11	mmu:27207; P04643; P62281	Cytoplasmic Ribosomal Proteins; TNF-alpha NF-kB Signaling Pathway; mRNA processing	L13a-mediated translational silencing of Ceruloplasmin expression; SRP-dependent cotranslational protein targeting to membrane; Major pathway of rRNA processing in the nucleolus and cytosol; Formation of a pool of free 40S subunits; GTP hydrolysis and joining of the 60S ribosomal subunit; Nonsense Mediated Decay (NMD) independent of the Exon Junction Complex (EJC); Nonsense Mediated Decay (NMD) e…	13	0
High	P63323	40S ribosomal protein S12 OS=Mus musculus OX=10090 GN=Rps12 PE=1 SV=2	0	15.935	24	4	10	4	132	14.5	7.24	24.21	4	Pf01248			Rps12	P09388; P12728; P63323		L13a-mediated translational silencing of Ceruloplasmin expression; SRP-dependent cotranslational protein targeting to membrane; Major pathway of rRNA processing in the nucleolus and cytosol; Formation of a pool of free 40S subunits; GTP hydrolysis and joining of the 60S ribosomal subunit; Nonsense Mediated Decay (NMD) independent of the Exon Junction Complex (EJC); Nonsense Mediated Decay (NMD) e…	10	0
High	P62301	40S ribosomal protein S13 OS=Mus musculus OX=10090 GN=Rps13 PE=1 SV=2	0	9.972	22	3	6	3	151	17.2	10.54	5.49	3	Pf00312	68052	ENSMUSG00000090862	Rps13	mmu:68052; P62301	Cytoplasmic Ribosomal Proteins; TNF-alpha NF-kB Signaling Pathway; mRNA processing	L13a-mediated translational silencing of Ceruloplasmin expression; SRP-dependent cotranslational protein targeting to membrane; Major pathway of rRNA processing in the nucleolus and cytosol; Formation of a pool of free 40S subunits; GTP hydrolysis and joining of the 60S ribosomal subunit; Nonsense Mediated Decay (NMD) independent of the Exon Junction Complex (EJC); Nonsense Mediated Decay (NMD) e…	13	0
High	P62264	40S ribosomal protein S14 OS=Mus musculus OX=10090 GN=Rps14 PE=1 SV=3	0	22.946	45	8	19	8	151	16.3	10.05	24.48	8	Pf00411	20044	ENSMUSG00000024608	Rps14	mmu:20044; P06366; P62264; Q544W4	Cytoplasmic Ribosomal Proteins; mRNA processing	Major pathway of rRNA processing in the nucleolus and cytosol; L13a-mediated translational silencing of Ceruloplasmin expression; GTP hydrolysis and joining of the 60S ribosomal subunit; Translation initiation complex formation; Ribosomal scanning and start codon recognition; SRP-dependent cotranslational protein targeting to membrane; Formation of a pool of free 40S subunits; Nonsense Mediated D…	12	0
High	P62245	40S ribosomal protein S15a OS=Mus musculus OX=10090 GN=Rps15a PE=1 SV=2	0	6.995	20	3	6	3	130	14.8	10.13	1.8	3	Pf00410	267019	ENSMUSG00000008683	Rps15a	mmu:267019; P39027; P39031; P62245; Q8C023; Q9BV24	Cytoplasmic Ribosomal Proteins	L13a-mediated translational silencing of Ceruloplasmin expression; SRP-dependent cotranslational protein targeting to membrane; Major pathway of rRNA processing in the nucleolus and cytosol; Formation of a pool of free 40S subunits; GTP hydrolysis and joining of the 60S ribosomal subunit; Nonsense Mediated Decay (NMD) independent of the Exon Junction Complex (EJC); Nonsense Mediated Decay (NMD) e…	11	0
High	P14131	40S ribosomal protein S16 OS=Mus musculus OX=10090 GN=Rps16 PE=1 SV=4	0	18.199	41	8	14	8	146	16.4	10.21	19.59	8	Pf00380	20055	ENSMUSG00000037563	Rps16	mmu:20055; P14131; Q3THM9	Cytoplasmic Ribosomal Proteins	L13a-mediated translational silencing of Ceruloplasmin expression; SRP-dependent cotranslational protein targeting to membrane; Major pathway of rRNA processing in the nucleolus and cytosol; Formation of a pool of free 40S subunits; GTP hydrolysis and joining of the 60S ribosomal subunit; Nonsense Mediated Decay (NMD) independent of the Exon Junction Complex (EJC); Nonsense Mediated Decay (NMD) e…	11	0
High	P63276	40S ribosomal protein S17 OS=Mus musculus OX=10090 GN=Rps17 PE=1 SV=2	0	7.469	19	1	2	1	135	15.5	9.85	5.55	1	Pf00833	20068	ENSMUSG00000061787	Rps17	mmu:20068; P06584; P63276	Cytoplasmic Ribosomal Proteins	L13a-mediated translational silencing of Ceruloplasmin expression; SRP-dependent cotranslational protein targeting to membrane; Major pathway of rRNA processing in the nucleolus and cytosol; Formation of a pool of free 40S subunits; GTP hydrolysis and joining of the 60S ribosomal subunit; Nonsense Mediated Decay (NMD) independent of the Exon Junction Complex (EJC); Nonsense Mediated Decay (NMD) e…	11	0
High	P62270	40S ribosomal protein S18 OS=Mus musculus OX=10090 GN=Rps18 PE=1 SV=3	0	6.909	18	3	5	3	152	17.7	10.99	11.67	3	Pf00416	20084	ENSMUSG00000008668	Rps18	mmu:20084; P25232; P62270	Cytoplasmic Ribosomal Proteins	L13a-mediated translational silencing of Ceruloplasmin expression; SRP-dependent cotranslational protein targeting to membrane; Major pathway of rRNA processing in the nucleolus and cytosol; Formation of a pool of free 40S subunits; GTP hydrolysis and joining of the 60S ribosomal subunit; Nonsense Mediated Decay (NMD) independent of the Exon Junction Complex (EJC); Nonsense Mediated Decay (NMD) e…	11	0
High	Q9CZX8	40S ribosomal protein S19 OS=Mus musculus OX=10090 GN=Rps19 PE=1 SV=3	0	17.764	52	9	17	9	145	16.1	10.4	24.45	9		20085	ENSMUSG00000040952	Rps19	mmu:20085; Q5M9J4; Q9CZX8	Cytoplasmic Ribosomal Proteins	L13a-mediated translational silencing of Ceruloplasmin expression; SRP-dependent cotranslational protein targeting to membrane; Major pathway of rRNA processing in the nucleolus and cytosol; Formation of a pool of free 40S subunits; GTP hydrolysis and joining of the 60S ribosomal subunit; Nonsense Mediated Decay (NMD) independent of the Exon Junction Complex (EJC); Nonsense Mediated Decay (NMD) e…	11	0
High	P25444	40S ribosomal protein S2 OS=Mus musculus OX=10090 GN=Rps2 PE=1 SV=3	0	34.373	41	10	19	10	293	31.2	10.24	30.47	10	Pf00333, Pf03719	16898	ENSMUSG00000044533	Rps2	mmu:16898; P25444	Cytoplasmic Ribosomal Proteins	RMTs methylate histone arginines; L13a-mediated translational silencing of Ceruloplasmin expression; SRP-dependent cotranslational protein targeting to membrane; Major pathway of rRNA processing in the nucleolus and cytosol; Formation of a pool of free 40S subunits; GTP hydrolysis and joining of the 60S ribosomal subunit; Nonsense Mediated Decay (NMD) independent of the Exon Junction Complex (EJC…	13	0
High	P60867	40S ribosomal protein S20 OS=Mus musculus OX=10090 GN=Rps20 PE=1 SV=1	0	12.171	25	4	9	4	119	13.4	9.94	17.83	4	Pf00338	67427	ENSMUSG00000028234	Rps20	mmu:67427; P17075; P60867	Cytoplasmic Ribosomal Proteins; mRNA processing	L13a-mediated translational silencing of Ceruloplasmin expression; SRP-dependent cotranslational protein targeting to membrane; Major pathway of rRNA processing in the nucleolus and cytosol; Formation of a pool of free 40S subunits; GTP hydrolysis and joining of the 60S ribosomal subunit; Nonsense Mediated Decay (NMD) independent of the Exon Junction Complex (EJC); Nonsense Mediated Decay (NMD) e…	12	0
High	Q9CQR2	40S ribosomal protein S21 OS=Mus musculus OX=10090 GN=Rps21 PE=1 SV=1	0	7.234	25	2	6	2	83	9.1	8.51	17.23	2	Pf01249	66481	ENSMUSG00000039001	Rps21	mmu:66481; Q5M9L3; Q9CQR2	Cytoplasmic Ribosomal Proteins	L13a-mediated translational silencing of Ceruloplasmin expression; SRP-dependent cotranslational protein targeting to membrane; Major pathway of rRNA processing in the nucleolus and cytosol; Formation of a pool of free 40S subunits; GTP hydrolysis and joining of the 60S ribosomal subunit; Nonsense Mediated Decay (NMD) independent of the Exon Junction Complex (EJC); Nonsense Mediated Decay (NMD) e…	11	0
High	P62267	40S ribosomal protein S23 OS=Mus musculus OX=10090 GN=Rps23 PE=1 SV=3	0	14.842	25	4	10	4	143	15.8	10.49	23.63	4	Pf00164	66475	ENSMUSG00000049517	Rps23	mmu:66475; P39028; P62267; Q542K7	Cytoplasmic Ribosomal Proteins; mRNA processing	L13a-mediated translational silencing of Ceruloplasmin expression; SRP-dependent cotranslational protein targeting to membrane; Major pathway of rRNA processing in the nucleolus and cytosol; Formation of a pool of free 40S subunits; GTP hydrolysis and joining of the 60S ribosomal subunit; Nonsense Mediated Decay (NMD) independent of the Exon Junction Complex (EJC); Nonsense Mediated Decay (NMD) e…	12	0
High	P62849	40S ribosomal protein S24 OS=Mus musculus OX=10090 GN=Rps24 PE=1 SV=1	0	6.33	25	3	6	3	133	15.4	10.78	5.19	3	Pf01282	20088	ENSMUSG00000025290	Rps24	mmu:20088; P16632; P62849; Q642L0; Q6PDB5	Cytoplasmic Ribosomal Proteins; mRNA processing	L13a-mediated translational silencing of Ceruloplasmin expression; SRP-dependent cotranslational protein targeting to membrane; Major pathway of rRNA processing in the nucleolus and cytosol; Formation of a pool of free 40S subunits; GTP hydrolysis and joining of the 60S ribosomal subunit; Nonsense Mediated Decay (NMD) independent of the Exon Junction Complex (EJC); Nonsense Mediated Decay (NMD) e…	12	0
High	P62852	40S ribosomal protein S25 OS=Mus musculus OX=10090 GN=Rps25 PE=1 SV=1	0.005	3.817	18	2	3	2	125	13.7	10.11	4.4	2	Pf03297	75617	ENSMUSG00000009927	Rps25	mmu:75617; P25111; P62852	Cytoplasmic Ribosomal Proteins	Major pathway of rRNA processing in the nucleolus and cytosol; L13a-mediated translational silencing of Ceruloplasmin expression; GTP hydrolysis and joining of the 60S ribosomal subunit; Translation initiation complex formation; Ribosomal scanning and start codon recognition; SRP-dependent cotranslational protein targeting to membrane; Formation of a pool of free 40S subunits; Nonsense Mediated D…	11	0
High	P62855	40S ribosomal protein S26 OS=Mus musculus OX=10090 GN=Rps26 PE=1 SV=3	0.001	5.404	23	2	4	2	115	13	11	2.07	2	Pf01283	27370	ENSMUSG00000025362	Rps26	mmu:27370; P02383; P62855; P70394; Q06722	Cytoplasmic Ribosomal Proteins	Major pathway of rRNA processing in the nucleolus and cytosol; L13a-mediated translational silencing of Ceruloplasmin expression; GTP hydrolysis and joining of the 60S ribosomal subunit; Translation initiation complex formation; Ribosomal scanning and start codon recognition; SRP-dependent cotranslational protein targeting to membrane; Formation of a pool of free 40S subunits; Nonsense Mediated D…	11	0
High	Q6ZWU9	40S ribosomal protein S27 OS=Mus musculus OX=10090 GN=Rps27 PE=1 SV=3	0	11.145	40	4	14	2	84	9.5	9.45	28.41	4	Pf01667	100043813; 57294	ENSMUSG00000050621; ENSMUSG00000090733	Rps27	mmu:100043813; mmu:57294; Q3TLE3; Q6ZWU9	Cytoplasmic Ribosomal Proteins; mRNA processing	Separation of Sister Chromatids; Amplification of signal from unattached kinetochores via a MAD2 inhibitory signal; Resolution of Sister Chromatid Cohesion; RHO GTPases Activate Formins; EML4 and NUDC in mitotic spindle formation; L13a-mediated translational silencing of Ceruloplasmin expression; SRP-dependent cotranslational protein targeting to membrane; Major pathway of rRNA processing in the …	18	2
High	Q6ZWY3	40S ribosomal protein S27-like OS=Mus musculus OX=10090 GN=Rps27l PE=1 SV=3	0	6.899	38	3	12	1	84	9.5	9.45	23.13	3	Pf01667	67941	ENSMUSG00000036781	Rps27l	mmu:67941; Q3UB68; Q6ZWY3		L13a-mediated translational silencing of Ceruloplasmin expression; SRP-dependent cotranslational protein targeting to membrane; Major pathway of rRNA processing in the nucleolus and cytosol; Formation of a pool of free 40S subunits; GTP hydrolysis and joining of the 60S ribosomal subunit; Nonsense Mediated Decay (NMD) independent of the Exon Junction Complex (EJC); Nonsense Mediated Decay (NMD) e…	10	0
High	P62858	40S ribosomal protein S28 OS=Mus musculus OX=10090 GN=Rps28 PE=1 SV=1	0	15.167	52	4	18	4	69	7.8	10.7	21.87	4	Pf01200	54127	ENSMUSG00000067288	Rps28	mmu:54127; P25112; P62858; Q5BKQ7	Cytoplasmic Ribosomal Proteins; mRNA processing	GTP hydrolysis and joining of the 60S ribosomal subunit; Ribosomal scanning and start codon recognition; L13a-mediated translational silencing of Ceruloplasmin expression; SRP-dependent cotranslational protein targeting to membrane; Major pathway of rRNA processing in the nucleolus and cytosol; Formation of a pool of free 40S subunits; Nonsense Mediated Decay (NMD) independent of the Exon Junctio…	12	0
High	P62908	40S ribosomal protein S3 OS=Mus musculus OX=10090 GN=Rps3 PE=1 SV=1	0	42.132	52	12	27	12	243	26.7	9.66	49.93	12	Pf00189, Pf07650	27050	ENSMUSG00000030744	Rps3	mmu:27050; P17073; P47933; P62908	Cytoplasmic Ribosomal Proteins	L13a-mediated translational silencing of Ceruloplasmin expression; SRP-dependent cotranslational protein targeting to membrane; Major pathway of rRNA processing in the nucleolus and cytosol; Formation of a pool of free 40S subunits; GTP hydrolysis and joining of the 60S ribosomal subunit; Nonsense Mediated Decay (NMD) independent of the Exon Junction Complex (EJC); Nonsense Mediated Decay (NMD) e…	11	0
High	P97351	40S ribosomal protein S3a OS=Mus musculus OX=10090 GN=Rps3a PE=1 SV=3	0	57.632	46	15	38	15	264	29.9	9.73	78.41	15	Pf01015	20091	ENSMUSG00000028081	Rps3a	mmu:20091; P97351	Cytoplasmic Ribosomal Proteins	L13a-mediated translational silencing of Ceruloplasmin expression; SRP-dependent cotranslational protein targeting to membrane; Major pathway of rRNA processing in the nucleolus and cytosol; Formation of a pool of free 40S subunits; GTP hydrolysis and joining of the 60S ribosomal subunit; Nonsense Mediated Decay (NMD) independent of the Exon Junction Complex (EJC); Nonsense Mediated Decay (NMD) e…	11	0
High	P62702	40S ribosomal protein S4, X isoform OS=Mus musculus OX=10090 GN=Rps4x PE=1 SV=2	0	29.314	43	12	26	12	263	29.6	10.15	42.8	12	Pf00467, Pf00900, Pf16121	20102	ENSMUSG00000031320	Rps4x	mmu:20102; P12631; P12750; P27576; P55831; P62702; Q14727; Q9CXN0	Cytoplasmic Ribosomal Proteins; mRNA processing	Major pathway of rRNA processing in the nucleolus and cytosol; L13a-mediated translational silencing of Ceruloplasmin expression; GTP hydrolysis and joining of the 60S ribosomal subunit; Translation initiation complex formation; Ribosomal scanning and start codon recognition; SRP-dependent cotranslational protein targeting to membrane; Formation of a pool of free 40S subunits; Nonsense Mediated D…	12	0
High	P97461	40S ribosomal protein S5 OS=Mus musculus OX=10090 GN=Rps5 PE=1 SV=3	0	12.203	17	4	8	4	204	22.9	9.72	15.62	4		20103		Rps5	mmu:20103; O08607; P97461	Cytoplasmic Ribosomal Proteins	L13a-mediated translational silencing of Ceruloplasmin expression; SRP-dependent cotranslational protein targeting to membrane; Major pathway of rRNA processing in the nucleolus and cytosol; Formation of a pool of free 40S subunits; GTP hydrolysis and joining of the 60S ribosomal subunit; Nonsense Mediated Decay (NMD) independent of the Exon Junction Complex (EJC); Nonsense Mediated Decay (NMD) e…	11	0
High	P62754	40S ribosomal protein S6 OS=Mus musculus OX=10090 GN=Rps6 PE=1 SV=1	0	37.31	33	12	28	11	249	28.7	10.84	63.59	12		105244208; 20104	ENSMUSG00000028495	Rps6	mmu:20104; P08227; P10660; P62754	Cytoplasmic Ribosomal Proteins; Focal Adhesion-PI3K-Akt-mTOR-signaling pathway; mRNA processing	L13a-mediated translational silencing of Ceruloplasmin expression; SRP-dependent cotranslational protein targeting to membrane; Major pathway of rRNA processing in the nucleolus and cytosol; Formation of a pool of free 40S subunits; GTP hydrolysis and joining of the 60S ribosomal subunit; Nonsense Mediated Decay (NMD) independent of the Exon Junction Complex (EJC); Nonsense Mediated Decay (NMD) e…	14	1
High	P62082	40S ribosomal protein S7 OS=Mus musculus OX=10090 GN=Rps7 PE=2 SV=1	0	27.005	30	10	24	10	194	22.1	10.1	36.43	10	Pf01251	20115	ENSMUSG00000061477	Rps7	mmu:20115; P23821; P24818; P62082	Cytoplasmic Ribosomal Proteins; mRNA processing	L13a-mediated translational silencing of Ceruloplasmin expression; SRP-dependent cotranslational protein targeting to membrane; Major pathway of rRNA processing in the nucleolus and cytosol; Formation of a pool of free 40S subunits; GTP hydrolysis and joining of the 60S ribosomal subunit; Nonsense Mediated Decay (NMD) independent of the Exon Junction Complex (EJC); Nonsense Mediated Decay (NMD) e…	12	0
High	P62242	40S ribosomal protein S8 OS=Mus musculus OX=10090 GN=Rps8 PE=1 SV=2	0	38.857	39	10	26	10	208	24.2	10.32	54.41	10	Pf01201	20116	ENSMUSG00000047675	Rps8	mmu:20116; P09058; P62242; Q8C2G6	Cytoplasmic Ribosomal Proteins	L13a-mediated translational silencing of Ceruloplasmin expression; SRP-dependent cotranslational protein targeting to membrane; Major pathway of rRNA processing in the nucleolus and cytosol; Formation of a pool of free 40S subunits; GTP hydrolysis and joining of the 60S ribosomal subunit; Nonsense Mediated Decay (NMD) independent of the Exon Junction Complex (EJC); Nonsense Mediated Decay (NMD) e…	11	0
High	Q6ZWN5	40S ribosomal protein S9 OS=Mus musculus OX=10090 GN=Rps9 PE=1 SV=3	0	23.535	30	7	18	7	194	22.6	10.65	27.22	7	Pf00163, Pf01479	76846	ENSMUSG00000006333	Rps9	mmu:76846; Q3UBF1; Q6ZWN5; Q8K2D1	mRNA processing	Major pathway of rRNA processing in the nucleolus and cytosol; L13a-mediated translational silencing of Ceruloplasmin expression; GTP hydrolysis and joining of the 60S ribosomal subunit; Translation initiation complex formation; Ribosomal scanning and start codon recognition; SRP-dependent cotranslational protein targeting to membrane; Formation of a pool of free 40S subunits; Nonsense Mediated D…	11	0
High	P14206	40S ribosomal protein SA OS=Mus musculus OX=10090 GN=Rpsa PE=1 SV=4	0	20.77	23	4	9	4	295	32.8	4.87	25.04	4	Pf16122	16785	ENSMUSG00000032518	Rpsa	mmu:16785; P14206; Q58E74; Q8BHL0; Q8BNL2; Q91V31; Q9CY13	Cytoplasmic Ribosomal Proteins; Alpha6-Beta4 Integrin Signaling Pathway	L13a-mediated translational silencing of Ceruloplasmin expression; SRP-dependent cotranslational protein targeting to membrane; Major pathway of rRNA processing in the nucleolus and cytosol; Formation of a pool of free 40S subunits; GTP hydrolysis and joining of the 60S ribosomal subunit; Nonsense Mediated Decay (NMD) independent of the Exon Junction Complex (EJC); Nonsense Mediated Decay (NMD) e…	12	0
High	P10852	4F2 cell-surface antigen heavy chain OS=Mus musculus OX=10090 GN=Slc3a2 PE=1 SV=1	0	23.998	9	5	9	5	526	58.3	5.91	25.89	5	Pf00128, Pf16028	17254	ENSMUSG00000010095	Slc3a2	G3UWA6; mmu:17254; P10852; Q54AH5		Basigin interactions; Amino acid transport across the plasma membrane; Tryptophan catabolism	3	0
High	Q9JM14	5'(3')-deoxyribonucleotidase, cytosolic type OS=Mus musculus OX=10090 GN=Nt5c PE=1 SV=1	0	6.797	13	2	2	2	200	23.1	5.49	4.06	2	Pf06941	50773	ENSMUSG00000020736	Nt5c	mmu:50773; Q9JM14	Purine metabolism	Purine catabolism; Pyrimidine catabolism	3	0
High	P97789	5'-3' exoribonuclease 1 OS=Mus musculus OX=10090 GN=Xrn1 PE=1 SV=1	0	29.658	6	9	16	9	1719	194.2	7.5	41.48	9	Pf03159, Pf17846, Pf18129, Pf18332			Xrn1	O35651; P97789; P97790; Q3TE44; Q3TRE9; Q3UQL5		Tristetraprolin (TTP, ZFP36) binds and destabilizes mRNA; Butyrate Response Factor 1 (BRF1) binds and destabilizes mRNA	2	0
High	Q9DBR1	5'-3' exoribonuclease 2 OS=Mus musculus OX=10090 GN=Xrn2 PE=1 SV=1	0	9.362	3	3	5	3	951	108.6	7.59	7.17	3	Pf03159, Pf17846	24128	ENSMUSG00000027433	Xrn2	mmu:24128; Q3TI26; Q3TKF2; Q3UZT9; Q61489; Q99KS7; Q9DBR1	mRNA processing	Major pathway of rRNA processing in the nucleolus and cytosol	2	0
High	Q5EG47	5'-AMP-activated protein kinase catalytic subunit alpha-1 OS=Mus musculus OX=10090 GN=Prkaa1 PE=1 SV=2	0	16.023	12	6	9	3	559	63.9	8.12	23.62	6	Pf16579	105787	ENSMUSG00000050697	Prkaa1	mmu:105787; Q5EG47	Focal Adhesion-PI3K-Akt-mTOR-signaling pathway; Insulin Signaling; Leptin and adiponectin	Regulation of TP53 Activity through Phosphorylation; Macroautophagy; TP53 Regulates Metabolic Genes; Energy dependent regulation of mTOR by LKB1-AMPK	7	0
High	Q8BRK8	5'-AMP-activated protein kinase catalytic subunit alpha-2 OS=Mus musculus OX=10090 GN=Prkaa2 PE=1 SV=3	0	36.772	28	12	19	9	552	62	7.87	46.46	12	Pf16579	108079	ENSMUSG00000028518	Prkaa2	B1ASQ8; mmu:108079; Q3UYM4; Q8BRK8	Focal Adhesion-PI3K-Akt-mTOR-signaling pathway; Insulin Signaling	Carnitine metabolism; Regulation of TP53 Activity through Phosphorylation; TP53 Regulates Metabolic Genes; Macroautophagy; Energy dependent regulation of mTOR by LKB1-AMPK; AMPK inhibits chREBP transcriptional activation activity	8	3
Medium	Q6PAM0	5'-AMP-activated protein kinase subunit beta-2 OS=Mus musculus OX=10090 GN=Prkab2 PE=1 SV=1	0.022	2.266	4	1	1	1	271	30.2	6.46	0	1	Pf04739, Pf16561	108097	ENSMUSG00000038205	Prkab2	mmu:108097; Q6PAM0		TP53 Regulates Metabolic Genes; Regulation of TP53 Activity through Phosphorylation; Energy dependent regulation of mTOR by LKB1-AMPK; Carnitine metabolism; Macroautophagy; AMPK inhibits chREBP transcriptional activation activity	6	0
Medium	O54950	5'-AMP-activated protein kinase subunit gamma-1 OS=Mus musculus OX=10090 GN=Prkag1 PE=1 SV=2	0.022	2.236	3	1	1	1	330	37.5	7.14	2.2	1	Pf00571	19082	ENSMUSG00000067713	Prkag1	mmu:19082; O54950; Q5PRE8	Leptin and adiponectin	Macroautophagy; Regulation of TP53 Activity through Phosphorylation; TP53 Regulates Metabolic Genes; Energy dependent regulation of mTOR by LKB1-AMPK	5	0
High	Q91WG5	5'-AMP-activated protein kinase subunit gamma-2 OS=Mus musculus OX=10090 GN=Prkag2 PE=1 SV=2	0	6.919	7	3	3	3	566	62.9	9.36	4.63	3	Pf00571	108099	ENSMUSG00000028944	Prkag2	E9QK80; mmu:108099; Q6V7V5; Q91WG5		Regulation of TP53 Activity through Phosphorylation; Macroautophagy; TP53 Regulates Metabolic Genes; Energy dependent regulation of mTOR by LKB1-AMPK; Carnitine metabolism; AMPK inhibits chREBP transcriptional activation activity	6	0
High	Q3UHB1	5'-nucleotidase domain-containing protein 3 OS=Mus musculus OX=10090 GN=Nt5dc3 PE=1 SV=1	0.007	3.645	2	1	3	1	546	63.1	8.56	5.16	1	Pf05761	103466	ENSMUSG00000054027	Nt5dc3	mmu:103466; Q3T9W5; Q3UHB1			0	0
Low	P08680	5-aminolevulinate synthase, erythroid-specific, mitochondrial OS=Mus musculus OX=10090 GN=Alas2 PE=1 SV=3	0.164	0.957	3	1	1	1	587	64.7	7.83	0	1	Pf09029	11656	ENSMUSG00000025270	Alas2	mmu:11656; P08680; Q64452; Q9DCN0	Heme Biosynthesis	Heme biosynthesis	2	0
Medium	P35363	5-hydroxytryptamine receptor 2A OS=Mus musculus OX=10090 GN=Htr2a PE=1 SV=1	0.039	1.915	2	1	1	1	471	52.8	6.99	2.67	1	Pf00001	15558	ENSMUSG00000034997	Htr2a	mmu:15558; P35363	SIDS Susceptibility Pathways; Non-odorant GPCRs; GPCRs, Class A Rhodopsin-like; Serotonin Receptor 2 and STAT3 Signaling; Serotonin and anxiety-related events; Serotonin and anxiety; Monoamine GPCRs	G alpha (q) signalling events; Serotonin receptors	9	0
High	Q8K010	5-oxoprolinase OS=Mus musculus OX=10090 GN=Oplah PE=1 SV=1	0	11.605	7	6	7	6	1288	137.5	6.28	8.8	6	Pf01968, Pf02538	75475	ENSMUSG00000022562	Oplah	mmu:75475; Q8K010; Q8R3K2	Glutathione metabolism; Oxidative Stress and Redox Pathway; Glutathione and one carbon metabolism	Glutathione synthesis and recycling	4	0
High	P70290	55 kDa erythrocyte membrane protein OS=Mus musculus OX=10090 GN=Mpp1 PE=1 SV=1	0	10.702	11	4	5	4	466	52.2	7.2	2.97	4	Pf00018, Pf00625	17524	ENSMUSG00000031402	Mpp1	mmu:17524; P70290			0	0
High	P70265	6-phosphofructo-2-kinase/fructose-2,6-bisphosphatase 2 OS=Mus musculus OX=10090 GN=Pfkfb2 PE=1 SV=2	0	11.044	5	2	3	2	519	59.9	8.12	9.41	2	Pf00300, Pf01591	18640		Pfkfb2	mmu:18640; P70265; Q8VEI9	Focal Adhesion-PI3K-Akt-mTOR-signaling pathway	Regulation of glycolysis by fructose 2,6-bisphosphate metabolism	2	0
High	Q9DCD0	6-phosphogluconate dehydrogenase, decarboxylating OS=Mus musculus OX=10090 GN=Pgd PE=1 SV=3	0	59.551	28	13	28	13	483	53.2	7.23	63.68	13	Pf03446	110208	ENSMUSG00000028961	Pgd	mmu:110208; Q3UD80; Q9DCD0	Oxidative Stress and Redox Pathway; Pentose Phosphate Pathway	Pentose phosphate pathway	3	0
High	Q9CQ60	6-phosphogluconolactonase OS=Mus musculus OX=10090 GN=Pgls PE=1 SV=1	0	17.285	26	4	8	4	257	27.2	5.85	26.61	4	Pf01182	66171	ENSMUSG00000031807	Pgls	mmu:66171; Q3TA62; Q9CQ60	Pentose Phosphate Pathway	Pentose phosphate pathway	2	0
High	P63038	60 kDa heat shock protein, mitochondrial OS=Mus musculus OX=10090 GN=Hspd1 PE=1 SV=1	0	77.923	41	20	41	20	573	60.9	6.18	85.59	20	Pf00118	15510	ENSMUSG00000025980	Hspd1	mmu:15510; P19226; P19227; P63038; P97602; Q3KQP2; Q3UIP0; Q8C2C7; Q8VEF4	SIDS Susceptibility Pathways	Mitochondrial protein import	2	0
High	O08848	60 kDa SS-A/Ro ribonucleoprotein OS=Mus musculus OX=10090 GN=RO60 PE=1 SV=1	0	7.301	6	3	4	3	538	60.1	7.9	9.14	3		20822	ENSMUSG00000018199	RO60	mmu:20822; O08848; Q9QYD8	mRNA processing		1	0
High	P14869	60S acidic ribosomal protein P0 OS=Mus musculus OX=10090 GN=Rplp0 PE=1 SV=3	0	20.685	27	6	10	6	317	34.2	6.25	21.46	6	Pf00428	11837	ENSMUSG00000067274	Rplp0	mmu:11837; P14869; Q99L54	Cytoplasmic Ribosomal Proteins	L13a-mediated translational silencing of Ceruloplasmin expression; SRP-dependent cotranslational protein targeting to membrane; Major pathway of rRNA processing in the nucleolus and cytosol; Formation of a pool of free 40S subunits; GTP hydrolysis and joining of the 60S ribosomal subunit; Nonsense Mediated Decay (NMD) independent of the Exon Junction Complex (EJC); Nonsense Mediated Decay (NMD) e…	8	0
Medium	P47955	60S acidic ribosomal protein P1 OS=Mus musculus OX=10090 GN=Rplp1 PE=1 SV=1	0.018	2.352	38	1	1	1	114	11.5	4.32	0	1	Pf00428	56040	ENSMUSG00000007892	Rplp1	mmu:56040; P47955	Cytoplasmic Ribosomal Proteins	L13a-mediated translational silencing of Ceruloplasmin expression; SRP-dependent cotranslational protein targeting to membrane; Major pathway of rRNA processing in the nucleolus and cytosol; Formation of a pool of free 40S subunits; GTP hydrolysis and joining of the 60S ribosomal subunit; Nonsense Mediated Decay (NMD) independent of the Exon Junction Complex (EJC); Nonsense Mediated Decay (NMD) e…	8	0
High	P99027	60S acidic ribosomal protein P2 OS=Mus musculus OX=10090 GN=Rplp2 PE=1 SV=3	0	23.785	60	5	10	5	115	11.6	4.54	29.25	5	Pf00428	67186	ENSMUSG00000025508	Rplp2	mmu:67186; P99027; Q3TKY3; Q9CQ99; Q9CZJ8	Cytoplasmic Ribosomal Proteins	Major pathway of rRNA processing in the nucleolus and cytosol; L13a-mediated translational silencing of Ceruloplasmin expression; GTP hydrolysis and joining of the 60S ribosomal subunit; SRP-dependent cotranslational protein targeting to membrane; Formation of a pool of free 40S subunits; Nonsense Mediated Decay (NMD) independent of the Exon Junction Complex (EJC); Nonsense Mediated Decay (NMD) e…	8	0
High	Q6ZWV3	60S ribosomal protein L10 OS=Mus musculus OX=10090 GN=Rpl10 PE=1 SV=3	0	12.377	32	5	16	5	214	24.6	10.08	37.86	5	Pf00252	110954	ENSMUSG00000008682; ENSMUSG00000058443	Rpl10	mmu:110954; P45634; Q569M8; Q5M9K8; Q6ZWV3	Cytoplasmic Ribosomal Proteins	L13a-mediated translational silencing of Ceruloplasmin expression; SRP-dependent cotranslational protein targeting to membrane; Major pathway of rRNA processing in the nucleolus and cytosol; Formation of a pool of free 40S subunits; GTP hydrolysis and joining of the 60S ribosomal subunit; Nonsense Mediated Decay (NMD) independent of the Exon Junction Complex (EJC); Nonsense Mediated Decay (NMD) e…	8	0
High	P53026	60S ribosomal protein L10a OS=Mus musculus OX=10090 GN=Rpl10a PE=1 SV=3	0	7.196	17	4	9	4	217	24.9	9.98	11.62	4				Rpl10a	P53026		L13a-mediated translational silencing of Ceruloplasmin expression; SRP-dependent cotranslational protein targeting to membrane; Major pathway of rRNA processing in the nucleolus and cytosol; Formation of a pool of free 40S subunits; GTP hydrolysis and joining of the 60S ribosomal subunit; Nonsense Mediated Decay (NMD) independent of the Exon Junction Complex (EJC); Nonsense Mediated Decay (NMD) e…	7	0
High	Q9CXW4	60S ribosomal protein L11 OS=Mus musculus OX=10090 GN=Rpl11 PE=1 SV=4	0	12.221	19	4	6	4	178	20.2	9.6	9.97	4	Pf00281, Pf00673	67025	ENSMUSG00000059291	Rpl11	mmu:67025; Q3TPE3; Q6ZWY0; Q9CXW4	Cytoplasmic Ribosomal Proteins; mRNA processing	L13a-mediated translational silencing of Ceruloplasmin expression; SRP-dependent cotranslational protein targeting to membrane; Major pathway of rRNA processing in the nucleolus and cytosol; Formation of a pool of free 40S subunits; GTP hydrolysis and joining of the 60S ribosomal subunit; Nonsense Mediated Decay (NMD) independent of the Exon Junction Complex (EJC); Nonsense Mediated Decay (NMD) e…	9	0
High	P35979	60S ribosomal protein L12 OS=Mus musculus OX=10090 GN=Rpl12 PE=1 SV=2	0	29.955	48	6	11	6	165	17.8	9.42	24.61	6		269261	ENSMUSG00000038900	Rpl12	mmu:269261; P35979; Q9CQK4	Cytoplasmic Ribosomal Proteins; mRNA processing	L13a-mediated translational silencing of Ceruloplasmin expression; SRP-dependent cotranslational protein targeting to membrane; Major pathway of rRNA processing in the nucleolus and cytosol; Formation of a pool of free 40S subunits; GTP hydrolysis and joining of the 60S ribosomal subunit; Nonsense Mediated Decay (NMD) independent of the Exon Junction Complex (EJC); Nonsense Mediated Decay (NMD) e…	9	0
High	P47963	60S ribosomal protein L13 OS=Mus musculus OX=10090 GN=Rpl13 PE=1 SV=3	0	32.374	39	11	25	11	211	24.3	11.55	41.09	11		270106	ENSMUSG00000000740	Rpl13	mmu:270106; P47963; Q9CRZ9; Q9DCH1	Cytoplasmic Ribosomal Proteins	Major pathway of rRNA processing in the nucleolus and cytosol; L13a-mediated translational silencing of Ceruloplasmin expression; GTP hydrolysis and joining of the 60S ribosomal subunit; SRP-dependent cotranslational protein targeting to membrane; Formation of a pool of free 40S subunits; Nonsense Mediated Decay (NMD) independent of the Exon Junction Complex (EJC); Nonsense Mediated Decay (NMD) e…	8	0
High	P19253	60S ribosomal protein L13a OS=Mus musculus OX=10090 GN=Rpl13a PE=1 SV=4	0	34.181	38	12	28	12	203	23.4	11.02	35.16	12		22121	ENSMUSG00000074129	Rpl13a	mmu:22121; P19253	Cytoplasmic Ribosomal Proteins	L13a-mediated translational silencing of Ceruloplasmin expression; SRP-dependent cotranslational protein targeting to membrane; Major pathway of rRNA processing in the nucleolus and cytosol; Formation of a pool of free 40S subunits; GTP hydrolysis and joining of the 60S ribosomal subunit; Nonsense Mediated Decay (NMD) independent of the Exon Junction Complex (EJC); Nonsense Mediated Decay (NMD) e…	8	0
High	Q9CR57	60S ribosomal protein L14 OS=Mus musculus OX=10090 GN=Rpl14 PE=1 SV=3	0	20.117	37	9	16	9	217	23.5	11.02	22.99	9	Pf01929	67115	ENSMUSG00000025794	Rpl14	mmu:67115; Q9CR57; Q9D8Q1		L13a-mediated translational silencing of Ceruloplasmin expression; SRP-dependent cotranslational protein targeting to membrane; Major pathway of rRNA processing in the nucleolus and cytosol; Formation of a pool of free 40S subunits; GTP hydrolysis and joining of the 60S ribosomal subunit; Nonsense Mediated Decay (NMD) independent of the Exon Junction Complex (EJC); Nonsense Mediated Decay (NMD) e…	7	0
High	Q9CZM2	60S ribosomal protein L15 OS=Mus musculus OX=10090 GN=Rpl15 PE=1 SV=4	0	12.408	21	4	7	4	204	24.1	11.62	11.17	4	Pf00827	66480	ENSMUSG00000012405	Rpl15	mmu:66480; Q9CWI5; Q9CZM2	Cytoplasmic Ribosomal Proteins	Major pathway of rRNA processing in the nucleolus and cytosol; L13a-mediated translational silencing of Ceruloplasmin expression; GTP hydrolysis and joining of the 60S ribosomal subunit; SRP-dependent cotranslational protein targeting to membrane; Formation of a pool of free 40S subunits; Nonsense Mediated Decay (NMD) independent of the Exon Junction Complex (EJC); Nonsense Mediated Decay (NMD) e…	8	0
High	Q9CPR4	60S ribosomal protein L17 OS=Mus musculus OX=10090 GN=Rpl17 PE=1 SV=3	0	22.239	30	5	15	4	184	21.4	10.18	37.76	5				Rpl17	Q9CPR4		L13a-mediated translational silencing of Ceruloplasmin expression; SRP-dependent cotranslational protein targeting to membrane; Major pathway of rRNA processing in the nucleolus and cytosol; Formation of a pool of free 40S subunits; GTP hydrolysis and joining of the 60S ribosomal subunit; Nonsense Mediated Decay (NMD) independent of the Exon Junction Complex (EJC); Nonsense Mediated Decay (NMD) e…	7	0
High	P35980	60S ribosomal protein L18 OS=Mus musculus OX=10090 GN=Rpl18 PE=1 SV=3	0	25.31	29	6	17	6	188	21.6	11.78	26.8	6	Pf17135	19899	ENSMUSG00000059070	Rpl18	mmu:19899; P35980; Q9CQF1; Q9D987	Cytoplasmic Ribosomal Proteins	L13a-mediated translational silencing of Ceruloplasmin expression; SRP-dependent cotranslational protein targeting to membrane; Major pathway of rRNA processing in the nucleolus and cytosol; Formation of a pool of free 40S subunits; GTP hydrolysis and joining of the 60S ribosomal subunit; Nonsense Mediated Decay (NMD) independent of the Exon Junction Complex (EJC); Nonsense Mediated Decay (NMD) e…	8	0
High	P62717	60S ribosomal protein L18a OS=Mus musculus OX=10090 GN=Rpl18a PE=1 SV=1	0	30.7	38	8	12	8	176	20.7	10.71	26.97	8	Pf01775	76808	ENSMUSG00000045128	Rpl18a	mmu:76808; P11249; P62717; Q3TSN0	Cytoplasmic Ribosomal Proteins	GTP hydrolysis and joining of the 60S ribosomal subunit; L13a-mediated translational silencing of Ceruloplasmin expression; SRP-dependent cotranslational protein targeting to membrane; Major pathway of rRNA processing in the nucleolus and cytosol; Formation of a pool of free 40S subunits; Nonsense Mediated Decay (NMD) independent of the Exon Junction Complex (EJC); Nonsense Mediated Decay (NMD) e…	8	0
High	P84099	60S ribosomal protein L19 OS=Mus musculus OX=10090 GN=Rpl19 PE=1 SV=1	0	14.07	17	4	11	3	196	23.5	11.47	27.49	4	Pf01280	19921	ENSMUSG00000017404	Rpl19	mmu:19921; P14118; P22908; P84099	Cytoplasmic Ribosomal Proteins; mRNA processing	L13a-mediated translational silencing of Ceruloplasmin expression; SRP-dependent cotranslational protein targeting to membrane; Major pathway of rRNA processing in the nucleolus and cytosol; Formation of a pool of free 40S subunits; GTP hydrolysis and joining of the 60S ribosomal subunit; Nonsense Mediated Decay (NMD) independent of the Exon Junction Complex (EJC); Nonsense Mediated Decay (NMD) e…	9	0
High	O09167	60S ribosomal protein L21 OS=Mus musculus OX=10090 GN=Rpl21 PE=1 SV=3	0	12.021	22	4	13	4	160	18.6	10.49	26.79	4	Pf01157			Rpl21	O09167		L13a-mediated translational silencing of Ceruloplasmin expression; SRP-dependent cotranslational protein targeting to membrane; Major pathway of rRNA processing in the nucleolus and cytosol; Formation of a pool of free 40S subunits; GTP hydrolysis and joining of the 60S ribosomal subunit; Nonsense Mediated Decay (NMD) independent of the Exon Junction Complex (EJC); Nonsense Mediated Decay (NMD) e…	7	0
High	P67984	60S ribosomal protein L22 OS=Mus musculus OX=10090 GN=Rpl22 PE=1 SV=2	0	10.257	27	3	6	3	128	14.8	9.19	16.71	3	Pf01776	19934	ENSMUSG00000028936	Rpl22	mmu:19934; P41104; P67984	Cytoplasmic Ribosomal Proteins; mRNA processing	L13a-mediated translational silencing of Ceruloplasmin expression; SRP-dependent cotranslational protein targeting to membrane; Major pathway of rRNA processing in the nucleolus and cytosol; Formation of a pool of free 40S subunits; GTP hydrolysis and joining of the 60S ribosomal subunit; Nonsense Mediated Decay (NMD) independent of the Exon Junction Complex (EJC); Nonsense Mediated Decay (NMD) e…	9	0
High	P62830	60S ribosomal protein L23 OS=Mus musculus OX=10090 GN=Rpl23 PE=1 SV=1	0	10.976	34	4	8	4	140	14.9	10.51	9.54	4		65019	ENSMUSG00000071415	Rpl23	mmu:100044627; mmu:100862455; mmu:65019; P23131; P24048; P62830; Q29246; Q3THU4; Q9CZE6; Q9DCQ4		L13a-mediated translational silencing of Ceruloplasmin expression; SRP-dependent cotranslational protein targeting to membrane; Major pathway of rRNA processing in the nucleolus and cytosol; Formation of a pool of free 40S subunits; GTP hydrolysis and joining of the 60S ribosomal subunit; Nonsense Mediated Decay (NMD) independent of the Exon Junction Complex (EJC); Nonsense Mediated Decay (NMD) e…	7	0
High	P62751	60S ribosomal protein L23a OS=Mus musculus OX=10090 GN=Rpl23a PE=1 SV=1	0	22.681	30	7	17	7	156	17.7	10.45	33.08	7		268449	ENSMUSG00000058546	Rpl23a	mmu:268449; P29316; P39024; P62751; Q92774	Cytoplasmic Ribosomal Proteins	Major pathway of rRNA processing in the nucleolus and cytosol; L13a-mediated translational silencing of Ceruloplasmin expression; GTP hydrolysis and joining of the 60S ribosomal subunit; SRP-dependent cotranslational protein targeting to membrane; Formation of a pool of free 40S subunits; Nonsense Mediated Decay (NMD) independent of the Exon Junction Complex (EJC); Nonsense Mediated Decay (NMD) e…	8	0
High	Q8BP67	60S ribosomal protein L24 OS=Mus musculus OX=10090 GN=Rpl24 PE=1 SV=2	0	15.746	29	5	16	5	157	17.8	11.25	25.95	5	Pf01246	68193	ENSMUSG00000098274	Rpl24	mmu:68193; P38663; Q58EA4; Q8BP67	Cytoplasmic Ribosomal Proteins	Major pathway of rRNA processing in the nucleolus and cytosol; L13a-mediated translational silencing of Ceruloplasmin expression; GTP hydrolysis and joining of the 60S ribosomal subunit; SRP-dependent cotranslational protein targeting to membrane; Formation of a pool of free 40S subunits; Nonsense Mediated Decay (NMD) independent of the Exon Junction Complex (EJC); Nonsense Mediated Decay (NMD) e…	8	0
High	P61255	60S ribosomal protein L26 OS=Mus musculus OX=10090 GN=Rpl26 PE=1 SV=1	0.003	4.389	12	2	5	2	145	17.2	10.55	4.62	2	Pf00467, Pf16906	19941	ENSMUSG00000060938	Rpl26	mmu:19941; P61255; Q02877	Cytoplasmic Ribosomal Proteins; mRNA processing	Major pathway of rRNA processing in the nucleolus and cytosol; L13a-mediated translational silencing of Ceruloplasmin expression; GTP hydrolysis and joining of the 60S ribosomal subunit; SRP-dependent cotranslational protein targeting to membrane; Formation of a pool of free 40S subunits; Nonsense Mediated Decay (NMD) independent of the Exon Junction Complex (EJC); Nonsense Mediated Decay (NMD) e…	9	0
High	P61358	60S ribosomal protein L27 OS=Mus musculus OX=10090 GN=Rpl27 PE=1 SV=2	0.003	4.631	7	1	2	1	136	15.8	10.56	4.48	1	Pf00467, Pf01777	108167922; 19942	ENSMUSG00000063316	Rpl27	mmu:19942; P61358	Cytoplasmic Ribosomal Proteins	L13a-mediated translational silencing of Ceruloplasmin expression; SRP-dependent cotranslational protein targeting to membrane; Major pathway of rRNA processing in the nucleolus and cytosol; Formation of a pool of free 40S subunits; GTP hydrolysis and joining of the 60S ribosomal subunit; Nonsense Mediated Decay (NMD) independent of the Exon Junction Complex (EJC); Nonsense Mediated Decay (NMD) e…	8	0
High	P14115	60S ribosomal protein L27a OS=Mus musculus OX=10090 GN=Rpl27a PE=1 SV=5	0	12.183	33	6	11	6	148	16.6	11.12	6.69	6	Pf00828	26451	ENSMUSG00000046364	Rpl27a	mmu:26451; P14115; Q9CQ16; Q9R1X6	Cytoplasmic Ribosomal Proteins	L13a-mediated translational silencing of Ceruloplasmin expression; SRP-dependent cotranslational protein targeting to membrane; Major pathway of rRNA processing in the nucleolus and cytosol; Formation of a pool of free 40S subunits; GTP hydrolysis and joining of the 60S ribosomal subunit; Nonsense Mediated Decay (NMD) independent of the Exon Junction Complex (EJC); Nonsense Mediated Decay (NMD) e…	8	0
High	P41105	60S ribosomal protein L28 OS=Mus musculus OX=10090 GN=Rpl28 PE=1 SV=2	0	32.14	35	7	21	7	137	15.7	12.02	32.97	7	Pf01778	19943	ENSMUSG00000030432	Rpl28	mmu:19943; P41105	Cytoplasmic Ribosomal Proteins	L13a-mediated translational silencing of Ceruloplasmin expression; SRP-dependent cotranslational protein targeting to membrane; Major pathway of rRNA processing in the nucleolus and cytosol; Formation of a pool of free 40S subunits; GTP hydrolysis and joining of the 60S ribosomal subunit; Nonsense Mediated Decay (NMD) independent of the Exon Junction Complex (EJC); Nonsense Mediated Decay (NMD) e…	8	0
High	P47915	60S ribosomal protein L29 OS=Mus musculus OX=10090 GN=Rpl29 PE=1 SV=2	0	18.587	30	8	16	8	160	17.6	11.84	18.99	8	Pf01779	19944	ENSMUSG00000048758	Rpl29	mmu:19944; P47915	Cytoplasmic Ribosomal Proteins	L13a-mediated translational silencing of Ceruloplasmin expression; SRP-dependent cotranslational protein targeting to membrane; Major pathway of rRNA processing in the nucleolus and cytosol; Formation of a pool of free 40S subunits; GTP hydrolysis and joining of the 60S ribosomal subunit; Nonsense Mediated Decay (NMD) independent of the Exon Junction Complex (EJC); Nonsense Mediated Decay (NMD) e…	8	0
High	P27659	60S ribosomal protein L3 OS=Mus musculus OX=10090 GN=Rpl3 PE=1 SV=3	0	38.391	25	11	25	11	403	46.1	10.21	32.03	11		27367	ENSMUSG00000060036	Rpl3	mmu:27367; O89071; P27659; Q91VJ6	Cytoplasmic Ribosomal Proteins	Major pathway of rRNA processing in the nucleolus and cytosol; L13a-mediated translational silencing of Ceruloplasmin expression; GTP hydrolysis and joining of the 60S ribosomal subunit; SRP-dependent cotranslational protein targeting to membrane; Formation of a pool of free 40S subunits; Nonsense Mediated Decay (NMD) independent of the Exon Junction Complex (EJC); Nonsense Mediated Decay (NMD) e…	8	0
High	P62889	60S ribosomal protein L30 OS=Mus musculus OX=10090 GN=Rpl30 PE=1 SV=2	0	13.245	22	2	12	2	115	12.8	9.63	31.37	2	Pf01248	19946	ENSMUSG00000058600	Rpl30	mmu:19946; P04645; P62889	Selenium metabolism/Selenoproteins; Cytoplasmic Ribosomal Proteins; TNF-alpha NF-kB Signaling Pathway	L13a-mediated translational silencing of Ceruloplasmin expression; SRP-dependent cotranslational protein targeting to membrane; Major pathway of rRNA processing in the nucleolus and cytosol; Formation of a pool of free 40S subunits; GTP hydrolysis and joining of the 60S ribosomal subunit; Nonsense Mediated Decay (NMD) independent of the Exon Junction Complex (EJC); Nonsense Mediated Decay (NMD) e…	10	0
High	P62900	60S ribosomal protein L31 OS=Mus musculus OX=10090 GN=Rpl31 PE=1 SV=1	0	11.613	27	4	10	4	125	14.5	10.54	18.73	4		114641	ENSMUSG00000073702	Rpl31	mmu:114641; P12947; P62900	Cytoplasmic Ribosomal Proteins	L13a-mediated translational silencing of Ceruloplasmin expression; SRP-dependent cotranslational protein targeting to membrane; Major pathway of rRNA processing in the nucleolus and cytosol; Formation of a pool of free 40S subunits; GTP hydrolysis and joining of the 60S ribosomal subunit; Nonsense Mediated Decay (NMD) independent of the Exon Junction Complex (EJC); Nonsense Mediated Decay (NMD) e…	8	0
High	P62911	60S ribosomal protein L32 OS=Mus musculus OX=10090 GN=Rpl32 PE=1 SV=2	0	15.632	38	5	15	5	135	15.9	11.33	29.93	5	Pf01655	19951	ENSMUSG00000057841	Rpl32	mmu:19951; P02433; P62911; Q3UFJ7	Cytoplasmic Ribosomal Proteins; mRNA processing	L13a-mediated translational silencing of Ceruloplasmin expression; SRP-dependent cotranslational protein targeting to membrane; Major pathway of rRNA processing in the nucleolus and cytosol; Formation of a pool of free 40S subunits; GTP hydrolysis and joining of the 60S ribosomal subunit; Nonsense Mediated Decay (NMD) independent of the Exon Junction Complex (EJC); Nonsense Mediated Decay (NMD) e…	9	0
High	Q9D1R9	60S ribosomal protein L34 OS=Mus musculus OX=10090 GN=Rpl34 PE=1 SV=2	0	17.112	42	6	18	6	117	13.3	11.47	26.21	6	Pf01199	619547; 68436	ENSMUSG00000062006	Rpl34	mmu:619547; mmu:68436; Q497V4; Q9D1R9	Cytoplasmic Ribosomal Proteins	L13a-mediated translational silencing of Ceruloplasmin expression; SRP-dependent cotranslational protein targeting to membrane; Major pathway of rRNA processing in the nucleolus and cytosol; Formation of a pool of free 40S subunits; GTP hydrolysis and joining of the 60S ribosomal subunit; Nonsense Mediated Decay (NMD) independent of the Exon Junction Complex (EJC); Nonsense Mediated Decay (NMD) e…	8	0
High	Q6ZWV7	60S ribosomal protein L35 OS=Mus musculus OX=10090 GN=Rpl35 PE=1 SV=1	0	6.411	22	4	6	2	123	14.5	11.05	3.7	4		66489	ENSMUSG00000062997; ENSMUSG00000078193	Rpl35	mmu:66489; Q6ZWV7	Cytoplasmic Ribosomal Proteins	GTP hydrolysis and joining of the 60S ribosomal subunit; L13a-mediated translational silencing of Ceruloplasmin expression; SRP-dependent cotranslational protein targeting to membrane; Major pathway of rRNA processing in the nucleolus and cytosol; Formation of a pool of free 40S subunits; Nonsense Mediated Decay (NMD) independent of the Exon Junction Complex (EJC); Nonsense Mediated Decay (NMD) e…	8	0
High	O55142	60S ribosomal protein L35a OS=Mus musculus OX=10090 GN=Rpl35a PE=1 SV=2	0.001	5.537	19	2	4	2	110	12.5	10.89	7.22	2	Pf01247	57808	ENSMUSG00000060636	Rpl35a	mmu:57808; O55142	Cytoplasmic Ribosomal Proteins	L13a-mediated translational silencing of Ceruloplasmin expression; SRP-dependent cotranslational protein targeting to membrane; Major pathway of rRNA processing in the nucleolus and cytosol; Formation of a pool of free 40S subunits; GTP hydrolysis and joining of the 60S ribosomal subunit; Nonsense Mediated Decay (NMD) independent of the Exon Junction Complex (EJC); Nonsense Mediated Decay (NMD) e…	8	0
High	P47964	60S ribosomal protein L36 OS=Mus musculus OX=10090 GN=Rpl36 PE=1 SV=2	0.001	5.712	18	2	6	2	105	12.2	11.34	6.71	2				Rpl36	P47964		L13a-mediated translational silencing of Ceruloplasmin expression; SRP-dependent cotranslational protein targeting to membrane; Major pathway of rRNA processing in the nucleolus and cytosol; Formation of a pool of free 40S subunits; GTP hydrolysis and joining of the 60S ribosomal subunit; Nonsense Mediated Decay (NMD) independent of the Exon Junction Complex (EJC); Nonsense Mediated Decay (NMD) e…	7	0
High	P83882	60S ribosomal protein L36a OS=Mus musculus OX=10090 GN=Rpl36a PE=3 SV=2	0	6.229	9	2	4	2	106	12.4	10.58	2.48	2	Pf00935	19982; 66483	ENSMUSG00000049751; ENSMUSG00000079435	Rpl36a	mmu:19982; mmu:66483; P09896; P10661; P83882	Cytoplasmic Ribosomal Proteins	L13a-mediated translational silencing of Ceruloplasmin expression; SRP-dependent cotranslational protein targeting to membrane; Major pathway of rRNA processing in the nucleolus and cytosol; Formation of a pool of free 40S subunits; GTP hydrolysis and joining of the 60S ribosomal subunit; Nonsense Mediated Decay (NMD) independent of the Exon Junction Complex (EJC); Nonsense Mediated Decay (NMD) e…	8	0
High	Q9D823	60S ribosomal protein L37 OS=Mus musculus OX=10090 GN=Rpl37 PE=3 SV=3	0	6.278	24	4	9	4	97	11.1	11.74	9.18	4	Pf01907	100502825; 67281	ENSMUSG00000041841	Rpl37	mmu:100502825; mmu:67281; Q6ZWV1; Q9D823	Cytoplasmic Ribosomal Proteins; mRNA processing	L13a-mediated translational silencing of Ceruloplasmin expression; SRP-dependent cotranslational protein targeting to membrane; Major pathway of rRNA processing in the nucleolus and cytosol; Formation of a pool of free 40S subunits; GTP hydrolysis and joining of the 60S ribosomal subunit; Nonsense Mediated Decay (NMD) independent of the Exon Junction Complex (EJC); Nonsense Mediated Decay (NMD) e…	9	0
Medium	Q9JJI8	60S ribosomal protein L38 OS=Mus musculus OX=10090 GN=Rpl38 PE=1 SV=3	0.018	2.39	17	1	1	1	70	8.2	10.1	2.77	1	Pf01781	67671	ENSMUSG00000057322	Rpl38	mmu:67671; Q9JJI8	Cytoplasmic Ribosomal Proteins; mRNA processing	L13a-mediated translational silencing of Ceruloplasmin expression; SRP-dependent cotranslational protein targeting to membrane; Major pathway of rRNA processing in the nucleolus and cytosol; Formation of a pool of free 40S subunits; GTP hydrolysis and joining of the 60S ribosomal subunit; Nonsense Mediated Decay (NMD) independent of the Exon Junction Complex (EJC); Nonsense Mediated Decay (NMD) e…	9	0
High	Q9D8E6	60S ribosomal protein L4 OS=Mus musculus OX=10090 GN=Rpl4 PE=1 SV=3	0	53.318	31	15	29	15	419	47.1	11	65.36	15	Pf00573	67891	ENSMUSG00000032399	Rpl4	mmu:67891; Q9CY08; Q9D8E6	Cytoplasmic Ribosomal Proteins; TNF-alpha NF-kB Signaling Pathway	L13a-mediated translational silencing of Ceruloplasmin expression; SRP-dependent cotranslational protein targeting to membrane; Major pathway of rRNA processing in the nucleolus and cytosol; Formation of a pool of free 40S subunits; GTP hydrolysis and joining of the 60S ribosomal subunit; Nonsense Mediated Decay (NMD) independent of the Exon Junction Complex (EJC); Nonsense Mediated Decay (NMD) e…	9	0
High	P47962	60S ribosomal protein L5 OS=Mus musculus OX=10090 GN=Rpl5 PE=1 SV=3	0	37.415	34	11	27	11	297	34.4	9.77	51.85	11	Pf14204, Pf17144	100503670	ENSMUSG00000058558	Rpl5	mmu:100503670; P47962; Q9CR19		L13a-mediated translational silencing of Ceruloplasmin expression; SRP-dependent cotranslational protein targeting to membrane; Major pathway of rRNA processing in the nucleolus and cytosol; Formation of a pool of free 40S subunits; GTP hydrolysis and joining of the 60S ribosomal subunit; Nonsense Mediated Decay (NMD) independent of the Exon Junction Complex (EJC); Nonsense Mediated Decay (NMD) e…	7	0
High	P47911	60S ribosomal protein L6 OS=Mus musculus OX=10090 GN=Rpl6 PE=1 SV=3	0	34.296	33	15	25	15	296	33.5	10.7	39.45	15		19988	ENSMUSG00000029614	Rpl6	mmu:19988; P47911; Q6P5I2; Q925C3	Cytoplasmic Ribosomal Proteins; TNF-alpha NF-kB Signaling Pathway	L13a-mediated translational silencing of Ceruloplasmin expression; SRP-dependent cotranslational protein targeting to membrane; Major pathway of rRNA processing in the nucleolus and cytosol; Formation of a pool of free 40S subunits; GTP hydrolysis and joining of the 60S ribosomal subunit; Nonsense Mediated Decay (NMD) independent of the Exon Junction Complex (EJC); Nonsense Mediated Decay (NMD) e…	9	0
High	P14148	60S ribosomal protein L7 OS=Mus musculus OX=10090 GN=Rpl7 PE=1 SV=2	0	28.403	30	10	27	10	270	31.4	10.89	40.7	10		19989	ENSMUSG00000043716	Rpl7	mmu:19989; P14148; Q80UR0	Cytoplasmic Ribosomal Proteins; mRNA processing	L13a-mediated translational silencing of Ceruloplasmin expression; SRP-dependent cotranslational protein targeting to membrane; Major pathway of rRNA processing in the nucleolus and cytosol; Formation of a pool of free 40S subunits; GTP hydrolysis and joining of the 60S ribosomal subunit; Nonsense Mediated Decay (NMD) independent of the Exon Junction Complex (EJC); Nonsense Mediated Decay (NMD) e…	9	0
High	P12970	60S ribosomal protein L7a OS=Mus musculus OX=10090 GN=Rpl7a PE=1 SV=2	0	32.898	38	13	20	12	266	30	10.56	37.06	13	Pf01248	27176	ENSMUSG00000062647	Rpl7a	mmu:27176; P12970; Q91YM3	Cytoplasmic Ribosomal Proteins	L13a-mediated translational silencing of Ceruloplasmin expression; SRP-dependent cotranslational protein targeting to membrane; Major pathway of rRNA processing in the nucleolus and cytosol; Formation of a pool of free 40S subunits; GTP hydrolysis and joining of the 60S ribosomal subunit; Nonsense Mediated Decay (NMD) independent of the Exon Junction Complex (EJC); Nonsense Mediated Decay (NMD) e…	8	0
High	P62918	60S ribosomal protein L8 OS=Mus musculus OX=10090 GN=Rpl8 PE=1 SV=2	0	11.673	22	7	11	7	257	28	11.03	15.7	7	Pf03947	26961	ENSMUSG00000003970	Rpl8	mmu:26961; P25120; P62918; Q3V288	Cytoplasmic Ribosomal Proteins; TNF-alpha NF-kB Signaling Pathway; mRNA processing	L13a-mediated translational silencing of Ceruloplasmin expression; SRP-dependent cotranslational protein targeting to membrane; Major pathway of rRNA processing in the nucleolus and cytosol; Formation of a pool of free 40S subunits; GTP hydrolysis and joining of the 60S ribosomal subunit; Nonsense Mediated Decay (NMD) independent of the Exon Junction Complex (EJC); Nonsense Mediated Decay (NMD) e…	10	0
High	P51410	60S ribosomal protein L9 OS=Mus musculus OX=10090 GN=Rpl9 PE=2 SV=2	0	15.579	29	6	10	6	192	21.9	9.95	11.54	6		20005	ENSMUSG00000047215	Rpl9	mmu:20005; P51410; Q9JK58	Cytoplasmic Ribosomal Proteins; mRNA processing	L13a-mediated translational silencing of Ceruloplasmin expression; SRP-dependent cotranslational protein targeting to membrane; Major pathway of rRNA processing in the nucleolus and cytosol; Formation of a pool of free 40S subunits; GTP hydrolysis and joining of the 60S ribosomal subunit; Nonsense Mediated Decay (NMD) independent of the Exon Junction Complex (EJC); Nonsense Mediated Decay (NMD) e…	9	0
High	O88455	7-dehydrocholesterol reductase OS=Mus musculus OX=10090 GN=Dhcr7 PE=1 SV=1	0	11.034	7	4	9	4	471	53.9	8.35	15.52	4	Pf01222	13360	ENSMUSG00000058454	Dhcr7	mmu:13360; O88455	Cholesterol Biosynthesis; Cholesterol metabolism (includes both Bloch and Kandutsch-Russell pathways)	Cholesterol biosynthesis via desmosterol; Cholesterol biosynthesis via lathosterol	4	0
Low	Q3UFY7	7-methylguanosine phosphate-specific 5'-nucleotidase OS=Mus musculus OX=10090 GN=Nt5c3b PE=1 SV=3	0.069	1.537	5	1	2	1	300	34.4	6.24	1.91	1	Pf05822	68106	ENSMUSG00000017176	Nt5c3b	A2A4I2; A2A4I3; mmu:68106; Q3TLP3; Q3UFY7; Q8BHU9; Q91WE8; Q9D9F9		mRNA decay by 3' to 5' exoribonuclease	1	0
High	Q8K3A9	7SK snRNA methylphosphate capping enzyme OS=Mus musculus OX=10090 GN=Mepce PE=1 SV=2	0	5.865	5	2	2	2	666	72	9.25	5.32	2	Pf06859, Pf13847	231803	ENSMUSG00000029726	Mepce	mmu:231803; Q2YFS5; Q3U465; Q3UT64; Q8K3A9; Q91W35			0	0
Low	Q8VDP3	[F-actin]-monooxygenase MICAL1 OS=Mus musculus OX=10090 GN=Mical1 PE=1 SV=1	0.067	1.567	1	1	2	1	1048	116.7	6.05	3.83	1	Pf00307, Pf01494, Pf12130	171580	ENSMUSG00000019823	Mical1	D3Z4C6; E9PXR1; mmu:171580; Q3TB77; Q3TBH9; Q3TX89; Q8VDP3			0	0
High	Q8CJ19	[F-actin]-monooxygenase MICAL3 OS=Mus musculus OX=10090 GN=Mical3 PE=1 SV=2	0	152.979	27	51	99	50	1993	223.6	5.47	197.23	51	Pf00307, Pf12130	194401	ENSMUSG00000051586	Mical3	B2RR77; mmu:194401; Q3UGQ8; Q3V160; Q69ZY5; Q80TE8; Q8BXB1; Q8CJ19			0	0
High	P54923	[Protein ADP-ribosylarginine] hydrolase OS=Mus musculus OX=10090 GN=Adprh PE=1 SV=1	0	14.74	16	6	7	6	362	40	5.76	13.53	6		11544	ENSMUSG00000002844	Adprh	mmu:11544; P54923			0	0
Low	Q8BFP9	[Pyruvate dehydrogenase (acetyl-transferring)] kinase isozyme 1, mitochondrial OS=Mus musculus OX=10090 GN=Pdk1 PE=1 SV=2	0.091	1.333	2	1	1	1	434	49	8.19	1.9	1		228026	ENSMUSG00000006494	Pdk1	mmu:228026; Q3U5E5; Q8BFP9	EPO Receptor Signaling; Factors and pathways affecting insulin-like growth factor (IGF1)-Akt signaling; TCA Cycle	Signaling by Retinoic Acid; Regulation of pyruvate dehydrogenase (PDH) complex	5	0
High	Q922H2	[Pyruvate dehydrogenase (acetyl-transferring)] kinase isozyme 3, mitochondrial OS=Mus musculus OX=10090 GN=Pdk3 PE=1 SV=1	0.009	3.344	4	1	1	1	415	47.9	8.82	3.14	1		236900	ENSMUSG00000035232	Pdk3	mmu:236900; Q8BTX1; Q922H2	TCA Cycle	Signaling by Retinoic Acid; Regulation of pyruvate dehydrogenase (PDH) complex	3	0
High	Q3UV70	[Pyruvate dehydrogenase [acetyl-transferring]]-phosphatase 1, mitochondrial OS=Mus musculus OX=10090 GN=Pdp1 PE=1 SV=1	0.004	4.132	3	1	3	1	538	61.1	6.67	9.2	1	Pf00481	381511	ENSMUSG00000049225	Pdp1	mmu:381511; Q3UV70	TCA Cycle	Regulation of pyruvate dehydrogenase (PDH) complex	2	0
Low	Q811B3	A disintegrin and metalloproteinase with thrombospondin motifs 12 OS=Mus musculus OX=10090 GN=Adamts12 PE=2 SV=2	0.17	0.942	1	1	1	1	1600	177.7	7.58	1.94	1	Pf01421	239337	ENSMUSG00000047497	Adamts12	E9QKD6; mmu:239337; Q811B3; Q8BK92; Q8BKY1		O-glycosylation of TSR domain-containing proteins	1	0
Low	Q769J6	A disintegrin and metalloproteinase with thrombospondin motifs 13 OS=Mus musculus OX=10090 GN=Adamts13 PE=1 SV=1	0.116	1.174	1	1	1	1	1426	155.3	6.57	0	1	Pf01421	279028	ENSMUSG00000014852	Adamts13	A2ALB4; mmu:279028; Q769J6; Q76LW1		O-glycosylation of TSR domain-containing proteins	1	0
Low	Q69Z28	A disintegrin and metalloproteinase with thrombospondin motifs 16 OS=Mus musculus OX=10090 GN=Adamts16 PE=2 SV=2	0.254	0.727	1	1	1	1	1222	136.2	8.59	0	1	Pf01421, Pf08686	271127	ENSMUSG00000049538	Adamts16	mmu:271127; Q69Z28; Q8K206		O-glycosylation of TSR domain-containing proteins	1	0
Low	P59511	A disintegrin and metalloproteinase with thrombospondin motifs 20 OS=Mus musculus OX=10090 GN=Adamts20 PE=2 SV=2	0.235	0.772	0	1	1	1	1906	211.9	7.94	0	1	Pf01421, Pf08685	223838	ENSMUSG00000022449	Adamts20	E9QLA1; mmu:223838; P59511		O-glycosylation of TSR domain-containing proteins	1	0
High	O08715	A-kinase anchor protein 1, mitochondrial OS=Mus musculus OX=10090 GN=Akap1 PE=1 SV=4	0	25.937	15	7	17	7	857	92.1	5.02	36.98	7	Pf00567	11640	ENSMUSG00000018428	Akap1	B1AR25; mmu:11640; O08714; O08715; P97488	G Protein Signaling Pathways; mRNA processing	Factors involved in megakaryocyte development and platelet production	3	0
High	O88845	A-kinase anchor protein 10, mitochondrial OS=Mus musculus OX=10090 GN=Akap10 PE=1 SV=3	0	9.127	6	3	5	3	662	73.6	6.79	8.19	3	Pf00615	56697	ENSMUSG00000047804	Akap10	mmu:56697; O88845; Q5SUB5; Q5SUB7; Q7TPE7; Q8BQL6	G Protein Signaling Pathways	Factors involved in megakaryocyte development and platelet production	2	0
High	Q9WTQ5	A-kinase anchor protein 12 OS=Mus musculus OX=10090 GN=Akap12 PE=1 SV=1	0	274.349	42	54	139	54	1684	180.6	4.44	379.22	54		83397	ENSMUSG00000038587	Akap12	mmu:83397; Q80SS4; Q810D4; Q8BPK4; Q99MP1; Q9WTQ5	G Protein Signaling Pathways	RHOF GTPase cycle; RHOD GTPase cycle	3	0
Low	E9Q394	A-kinase anchor protein 13 OS=Mus musculus OX=10090 GN=Akap13 PE=1 SV=1	0.135	1.071	0	1	1	1	2776	303.8	5.38	2.34	1		75547	ENSMUSG00000066406	Akap13	E9Q394; mmu:75547; Q3UEI5	G Protein Signaling Pathways	RHOA GTPase cycle; NRAGE signals death through JNK; G alpha (12/13) signalling events; RHOB GTPase cycle; RHOC GTPase cycle	6	0
High	D3YVF0	A-kinase anchor protein 5 OS=Mus musculus OX=10090 GN=Akap5 PE=1 SV=2	0	122.627	59	25	60	25	745	79.4	4.75	161.89	25		238276	ENSMUSG00000021057	Akap5	D3YVF0; D3Z5C9; mmu:238276	G Protein Signaling Pathways	Trafficking of AMPA receptors	2	0
High	Q7TN79	A-kinase anchor protein 7 isoform gamma OS=Mus musculus OX=10090 GN=Akap7 PE=1 SV=2	0	14.516	10	4	8	4	314	35.5	7.87	13.33	4	Pf10469	432442	ENSMUSG00000039166	Akap7	F8VQ58; Q7TN79	G Protein Signaling Pathways		1	0
High	Q9R0L7	A-kinase anchor protein 8-like OS=Mus musculus OX=10090 GN=Akap8l PE=1 SV=1	0	9.693	6	3	4	3	642	71.4	5.05	6.9	3	Pf04988			Akap8l	Q9R0L7			0	0
High	Q70FJ1	A-kinase anchor protein 9 OS=Mus musculus OX=10090 GN=Akap9 PE=1 SV=2	0.002	5.146	1	4	6	4	3797	435.9	5.03	8.22	4		100986		Akap9	mmu:100986; Q3TH74; Q70FJ1; Q80TR6	G Protein Signaling Pathways	Anchoring of the basal body to the plasma membrane; Regulation of PLK1 Activity at G2/M Transition; Loss of Nlp from mitotic centrosomes; Recruitment of mitotic centrosome proteins and complexes; Recruitment of NuMA to mitotic centrosomes; AURKA Activation by TPX2; Phase 2 - plateau phase; Phase 3 - rapid repolarisation	10	0
High	Q6NSW3	A-kinase anchor protein SPHKAP OS=Mus musculus OX=10090 GN=Sphkap PE=1 SV=2	0	74.272	15	19	34	19	1687	185	5.06	76.2	19				Sphkap	Q6NSW3; Q6PAM6; Q6PAP7; Q80TA7; Q80XT3; Q8BYQ9; Q8BZL6; Q8C1G7			0	0
Low	Q9D0L4	AarF domain-containing protein kinase 1 OS=Mus musculus OX=10090 GN=Adck1 PE=1 SV=1	0.1	1.277	2	1	1	1	525	59.7	8.05	0	1		72113	ENSMUSG00000021044	Adck1	mmu:72113; Q3UKJ2; Q9D0L4			0	0
Medium	Q8R1M0	Abasic site processing protein HMCES OS=Mus musculus OX=10090 GN=Hmces PE=1 SV=1	0.047	1.784	3	1	1	1	353	40.1	8.57	0	1		232210	ENSMUSG00000030060	Hmces	mmu:232210; Q8R1M0			0	0
High	Q8CBW3	Abl interactor 1 OS=Mus musculus OX=10090 GN=Abi1 PE=1 SV=3	0	64.066	41	17	42	12	481	52.3	7.64	84.76	17	Pf07815	11308	ENSMUSG00000058835	Abi1	mmu:11308; Q3U8V0; Q60747; Q8CBW3; Q91ZM5; Q923I9; Q99KH4	EGFR1 Signaling Pathway; Toll Like Receptor signaling	RAC1 GTPase cycle; RAC2 GTPase cycle; RAC3 GTPase cycle; Regulation of actin dynamics for phagocytic cup formation; VEGFA-VEGFR2 Pathway; RHO GTPases Activate WASPs and WAVEs	8	5
High	P62484	Abl interactor 2 OS=Mus musculus OX=10090 GN=Abi2 PE=1 SV=1	0	64.313	38	16	35	11	446	49.4	6.01	84.44	16	Pf07815, Pf14604	329165	ENSMUSG00000026782	Abi2	mmu:329165; P62484; Q6PHU3	Regulation of Actin Cytoskeleton	RAC1 GTPase cycle; RAC2 GTPase cycle; RAC3 GTPase cycle; Regulation of actin dynamics for phagocytic cup formation; VEGFA-VEGFR2 Pathway; RHO GTPases Activate WASPs and WAVEs	7	0
High	Q9DAZ9	Abscission/NoCut checkpoint regulator OS=Mus musculus OX=10090 GN=Zfyve19 PE=1 SV=2	0	7.577	10	3	5	3	389	43.2	6.54	10.48	3		72008	ENSMUSG00000068580	Zfyve19	A2AV55; mmu:72008; Q8VCV7; Q9DAZ9			0	0
Medium	Q9D2R0	Acetoacetyl-CoA synthetase OS=Mus musculus OX=10090 GN=Aacs PE=1 SV=1	0.043	1.861	1	1	4	1	672	75.2	6.71	1.81	1	Pf00501, Pf16177	78894	ENSMUSG00000029482	Aacs	A1IG47; mmu:78894; Q3TCL8; Q3UD39; Q9D2R0		Synthesis of Ketone Bodies	1	0
High	Q8CAY6	Acetyl-CoA acetyltransferase, cytosolic OS=Mus musculus OX=10090 GN=Acat2 PE=1 SV=2	0	24.968	30	9	16	9	397	41.3	7.5	24.74	9	Pf00108, Pf02803	110460	ENSMUSG00000023832	Acat2	mmu:110460; Q3TJY7; Q62292; Q8CAY6; Q96EB7; Q99K88; Q9CYV2		Cholesterol biosynthesis	1	0
High	Q8QZT1	Acetyl-CoA acetyltransferase, mitochondrial OS=Mus musculus OX=10090 GN=Acat1 PE=1 SV=1	0	88.644	48	22	52	22	424	44.8	8.51	105.98	22	Pf00108, Pf02803	110446	ENSMUSG00000032047	Acat1	mmu:110446; Q3TE92; Q8QZT1	Fatty Acid Beta Oxidation; Synthesis and Degradation of Ketone Bodies; Tryptophan metabolism	Branched-chain amino acid catabolism; Synthesis of Ketone Bodies; Utilization of Ketone Bodies	6	0
High	Q5SWU9	Acetyl-CoA carboxylase 1 OS=Mus musculus OX=10090 GN=Acaca PE=1 SV=1	0	444.286	47	108	369	92	2345	265.1	6.39	773.92	108	Pf00364, Pf01039, Pf02785, Pf08326	107476	ENSMUSG00000020532	Acaca	A2A6H4; mmu:107476; Q5SWU6; Q5SWU7; Q5SWU8; Q5SWU9; Q6JIZ1; Q6PHL9; Q705X8; Q705X9; Q91VC8; Q925C4; Q925C5	Focal Adhesion-PI3K-Akt-mTOR-signaling pathway; Fatty Acid Biosynthesis; Dysregulated miRNA Targeting in Insulin/PI3K-AKT Signaling; Leptin and adiponectin	Biotin transport and metabolism; ChREBP activates metabolic gene expression; Carnitine metabolism; Fatty acyl-CoA biosynthesis	8	16
High	E9Q4Z2	Acetyl-CoA carboxylase 2 OS=Mus musculus OX=10090 GN=Acacb PE=1 SV=1	0	66.244	7	18	61	1	2448	275.6	6.32	112.22	18	Pf00364, Pf01039, Pf02785, Pf02786, Pf08326	100705	ENSMUSG00000042010	Acacb	E9Q4Z2; mmu:100705; Q6JIZ0	Fatty Acid Biosynthesis	ChREBP activates metabolic gene expression; Biotin transport and metabolism; Carnitine metabolism	4	0
High	Q9QXG4	Acetyl-coenzyme A synthetase, cytoplasmic OS=Mus musculus OX=10090 GN=Acss2 PE=1 SV=2	0.009	3.196	1	1	1	1	701	78.8	6.64	2.39	1	Pf00501, Pf16177	60525	ENSMUSG00000027605	Acss2	mmu:60525; Q8BK97; Q9QXG4	Amino acid conjugation of benzoic acid; Fatty Acid Beta Oxidation; Fatty Acid Biosynthesis	Ethanol oxidation; Transcriptional activation of mitochondrial biogenesis	5	0
High	Q99J27	Acetyl-coenzyme A transporter 1 OS=Mus musculus OX=10090 GN=Slc33a1 PE=1 SV=1	0	11.529	9	3	3	3	550	61	8.16	7.71	3		11416	ENSMUSG00000027822	Slc33a1	mmu:11416; Q99J27; Q9WTN1		Transport of vitamins, nucleosides, and related molecules	1	0
High	P21836	Acetylcholinesterase OS=Mus musculus OX=10090 GN=Ache PE=1 SV=1	0	6.657	4	2	4	2	614	68.1	6.33	8.73	2	Pf00135, Pf08674	11423	ENSMUSG00000023328	Ache	mmu:11423; P21836	Acetylcholine Synthesis; Biogenic Amine Synthesis		2	0
Low	Q02067	Achaete-scute homolog 1 OS=Mus musculus OX=10090 GN=Ascl1 PE=1 SV=2	0.1	1.272	3	1	2	1	231	24.7	8.44	1.8	1	Pf00010	17172	ENSMUSG00000020052	Ascl1	mmu:17172; Q02067; Q7TNT5	SIDS Susceptibility Pathways; Dopaminergic Neurogenesis; Neural Crest Differentiation; Delta-Notch Signaling Pathway		4	0
Medium	Q9WV54	Acid ceramidase OS=Mus musculus OX=10090 GN=Asah1 PE=1 SV=1	0.015	2.506	3	1	2	1	394	44.6	8.46	4.08	1	Pf15508	11886	ENSMUSG00000031591	Asah1	mmu:11886; Q9WV54		Neutrophil degranulation; Glycosphingolipid metabolism	2	0
High	P58242	Acid sphingomyelinase-like phosphodiesterase 3b OS=Mus musculus OX=10090 GN=Smpdl3b PE=1 SV=1	0.009	3.299	4	2	2	2	456	51.6	6.43	0	2	Pf00149	100340	ENSMUSG00000028885	Smpdl3b	mmu:100340; P58242			0	0
High	Q6NXK8	Acid-sensing ion channel 1 OS=Mus musculus OX=10090 GN=Asic1 PE=1 SV=1	0.009	3.117	3	2	3	2	526	59.6	5.58	2.29	2		11419	ENSMUSG00000023017	Asic1	mmu:11419; Q50K97; Q6NXK8		Stimuli-sensing channels	1	0
Low	Q925H0	Acid-sensing ion channel 2 OS=Mus musculus OX=10090 GN=Asic2 PE=1 SV=1	0.201	0.852	1	1	1	1	512	57.7	5.19	0	1		11418	ENSMUSG00000020704	Asic2	mmu:11418; Q5SUU2; Q61203; Q925H0		Stimuli-sensing channels	1	0
Low	Q9JI19	Acidic fibroblast growth factor intracellular-binding protein OS=Mus musculus OX=10090 GN=Fibp PE=1 SV=1	0.085	1.379	2	1	1	1	357	41.2	6.76	0	1	Pf05427	58249	ENSMUSG00000024911	Fibp	mmu:58249; Q9JI19			0	0
High	O35381	Acidic leucine-rich nuclear phosphoprotein 32 family member A OS=Mus musculus OX=10090 GN=Anp32a PE=1 SV=1	0	25.659	25	7	17	7	247	28.5	4.07	32.1	7	Pf14580	11737	ENSMUSG00000032249	Anp32a	mmu:11737; O35381; P97437		HuR (ELAVL1) binds and stabilizes mRNA	1	0
High	P97822	Acidic leucine-rich nuclear phosphoprotein 32 family member E OS=Mus musculus OX=10090 GN=Anp32e PE=1 SV=2	0.002	4.928	5	1	2	1	260	29.6	3.88	6.61	1	Pf14580	66471	ENSMUSG00000015749	Anp32e	E9Q5H9; mmu:66471; P97822; Q3TH89; Q3TX26; Q8BPF8; Q8C2L4; Q8C7Q8; Q9CZD2			0	0
High	Q99KI0	Aconitate hydratase, mitochondrial OS=Mus musculus OX=10090 GN=Aco2 PE=1 SV=1	0	157.443	49	40	107	40	780	85.4	7.93	249.45	40	Pf00330	11429	ENSMUSG00000022477	Aco2	mmu:11429; Q3UDK9; Q3ULG9; Q3UNH7; Q505P4; Q99KI0	TCA Cycle	Citric acid cycle (TCA cycle)	2	0
High	Q80YS6	Actin filament-associated protein 1 OS=Mus musculus OX=10090 GN=Afap1 PE=1 SV=1	0.003	4.713	4	2	4	2	731	80.6	8.68	6.03	2		70292	ENSMUSG00000029094	Afap1	mmu:70292; Q3UGX1; Q6ZPE4; Q80YS6			0	0
Medium	Q5DTU0	Actin filament-associated protein 1-like 2 OS=Mus musculus OX=10090 GN=Afap1l2 PE=1 SV=2	0.015	2.516	3	1	1	1	825	92.1	5.44	2.41	1		226250	ENSMUSG00000025083	Afap1l2	mmu:226250; Q5DTU0; Q8BID1; Q8K2G0			0	0
High	P68134	Actin, alpha skeletal muscle OS=Mus musculus OX=10090 GN=Acta1 PE=1 SV=1	0	106.546	40	18	237	2	377	42	5.39	530.86	18	Pf00022	11459	ENSMUSG00000031972	Acta1	mmu:11459; P02568; P68134; P99020	Hypothetical Network for Drug Addiction; Myometrial Relaxation and Contraction Pathways	Striated Muscle Contraction	3	0
High	P60710	Actin, cytoplasmic 1 OS=Mus musculus OX=10090 GN=Actb PE=1 SV=1	0	207.271	70	29	335	11	375	41.7	5.48	846.08	29	Pf00022	11461	ENSMUSG00000029580	Actb	mmu:11461; P02570; P60710; P70514; P99021; Q11211; Q3TI89; Q3TVP6; Q64316; Q6ZWM3	Myometrial Relaxation and Contraction Pathways; Regulation of Actin Cytoskeleton; Focal Adhesion	EPHB-mediated forward signaling; RHOF GTPase cycle; VEGFA-VEGFR2 Pathway; UCH proteinases; DNA Damage Recognition in GG-NER; Clathrin-mediated endocytosis; Interaction between L1 and Ankyrins; Formation of annular gap junctions; Regulation of actin dynamics for phagocytic cup formation; MAP2K and MAPK activation; RHO GTPases Activate Formins; Recycling pathway of L1; RHO GTPases activate IQGAPs; …	21	18
High	Q8K4G5	Actin-binding LIM protein 1 OS=Mus musculus OX=10090 GN=Ablim1 PE=1 SV=1	0	107.018	36	29	74	28	861	96.7	8.63	143.57	29		226251	ENSMUSG00000025085	Ablim1	mmu:226251; Q80U86; Q8BIR9; Q8K4G3; Q8K4G4; Q8K4G5			0	1
High	Q8BL65	Actin-binding LIM protein 2 OS=Mus musculus OX=10090 GN=Ablim2 PE=1 SV=1	0	51.858	30	16	32	15	612	68.1	8.02	69.94	16		231148	ENSMUSG00000029095	Ablim2	B2RUF8; mmu:231148; Q6H8P8; Q80WK6; Q8BL65; Q8BUT1; Q8BXI7			0	0
High	Q69ZX8	Actin-binding LIM protein 3 OS=Mus musculus OX=10090 GN=Ablim3 PE=1 SV=2	0	35.577	22	14	22	13	682	77.6	8.54	42.77	14		319713	ENSMUSG00000032735	Ablim3	mmu:319713; Q52KR1; Q69ZX8; Q6PAI7			0	0
High	Q91WC0	Actin-histidine N-methyltransferase OS=Mus musculus OX=10090 GN=Setd3 PE=1 SV=1	0	7.727	8	3	4	3	594	67.1	5.6	5.35	3	Pf09273	52690	ENSMUSG00000056770	Setd3	mmu:52690; Q6PEN3; Q8CD86; Q8CDX8; Q91WC0; Q9CZZ1		PKMTs methylate histone lysines	1	0
High	Q99MR0	Actin-like protein 6B OS=Mus musculus OX=10090 GN=Actl6b PE=1 SV=1	0	7.041	8	2	3	2	426	46.9	5.71	5.58	2	Pf00022	83766	ENSMUSG00000029712	Actl6b	mmu:83766; Q54A88; Q99MR0		RMTs methylate histone arginines; RUNX1 interacts with co-factors whose precise effect on RUNX1 targets is not known	2	0
High	Q9QZB7	Actin-related protein 10 OS=Mus musculus OX=10090 GN=Actr10 PE=1 SV=2	0	20.344	25	8	13	8	417	46.2	7.61	25	8	Pf00022	56444	ENSMUSG00000021076	Actr10	mmu:56444; Q3TT18; Q99LU1; Q9QZB7		Neutrophil degranulation; MHC class II antigen presentation; COPI-mediated anterograde transport; HSP90 chaperone cycle for steroid hormone receptors (SHR); COPI-independent Golgi-to-ER retrograde traffic	5	0
High	P61161	Actin-related protein 2 OS=Mus musculus OX=10090 GN=Actr2 PE=1 SV=1	0	26.784	24	10	33	9	394	44.7	6.74	53.15	10	Pf00022	66713	ENSMUSG00000020152	Actr2	mmu:66713; O15142; P61161; Q6PI31	ESC Pluripotency Pathways	EPHB-mediated forward signaling; Clathrin-mediated endocytosis; Neutrophil degranulation; Regulation of actin dynamics for phagocytic cup formation; RHO GTPases Activate WASPs and WAVEs	6	0
High	Q9R0Q6	Actin-related protein 2/3 complex subunit 1A OS=Mus musculus OX=10090 GN=Arpc1a PE=1 SV=1	0	39.146	38	11	24	11	370	41.6	8.18	39.68	11	Pf00400	56443	ENSMUSG00000029621	Arpc1a	mmu:56443; Q3UL75; Q9R0Q6		Regulation of actin dynamics for phagocytic cup formation; EPHB-mediated forward signaling; RHO GTPases Activate WASPs and WAVEs; Clathrin-mediated endocytosis	4	0
High	Q9WV32	Actin-related protein 2/3 complex subunit 1B OS=Mus musculus OX=10090 GN=Arpc1b PE=1 SV=4	0.009	3.243	3	1	1	1	372	41	8.35	3.09	1	Pf00400	11867	ENSMUSG00000029622	Arpc1b	mmu:11867; Q9CRC4; Q9WV32	Microglia Pathogen Phagocytosis Pathway	EPHB-mediated forward signaling; Regulation of actin dynamics for phagocytic cup formation; RHO GTPases Activate WASPs and WAVEs	4	0
High	Q9CVB6	Actin-related protein 2/3 complex subunit 2 OS=Mus musculus OX=10090 GN=Arpc2 PE=1 SV=3	0	41.762	34	14	30	14	300	34.3	7.36	44.99	14	Pf04045	76709	ENSMUSG00000006304	Arpc2	mmu:76709; Q3U870; Q9CVB6		Regulation of actin dynamics for phagocytic cup formation; EPHB-mediated forward signaling; RHO GTPases Activate WASPs and WAVEs; Clathrin-mediated endocytosis	4	0
High	Q9JM76	Actin-related protein 2/3 complex subunit 3 OS=Mus musculus OX=10090 GN=Arpc3 PE=1 SV=3	0	21.361	33	6	21	6	178	20.5	8.59	45.88	6		56378	ENSMUSG00000029465	Arpc3	mmu:56378; Q3TAT0; Q9JM76		Regulation of actin dynamics for phagocytic cup formation; EPHB-mediated forward signaling; RHO GTPases Activate WASPs and WAVEs; Clathrin-mediated endocytosis	4	0
High	P59999	Actin-related protein 2/3 complex subunit 4 OS=Mus musculus OX=10090 GN=Arpc4 PE=1 SV=3	0	15.764	35	8	18	8	168	19.7	8.43	30.23	8		68089	ENSMUSG00000079426	Arpc4	mmu:68089; O15509; P59999; Q3UWV4		Clathrin-mediated endocytosis; EPHB-mediated forward signaling; Regulation of actin dynamics for phagocytic cup formation; RHO GTPases Activate WASPs and WAVEs	4	0
High	Q9CPW4	Actin-related protein 2/3 complex subunit 5 OS=Mus musculus OX=10090 GN=Arpc5 PE=1 SV=3	0	8.24	25	4	7	4	151	16.3	5.67	11.71	4	Pf04699	67771	ENSMUSG00000008475	Arpc5	mmu:67771; Q3U9T3; Q9CPW4; Q9D8E7	Regulation of Actin Cytoskeleton	EPHB-mediated forward signaling; Clathrin-mediated endocytosis; Neutrophil degranulation; Regulation of actin dynamics for phagocytic cup formation; RHO GTPases Activate WASPs and WAVEs	6	0
High	Q9D898	Actin-related protein 2/3 complex subunit 5-like protein OS=Mus musculus OX=10090 GN=Arpc5l PE=1 SV=1	0	12.914	20	3	7	3	153	17	6.8	18.11	3	Pf04699	74192	ENSMUSG00000026755	Arpc5l	mmu:74192; Q9D898			0	0
High	Q99JY9	Actin-related protein 3 OS=Mus musculus OX=10090 GN=Actr3 PE=1 SV=3	0	71.062	49	20	59	17	418	47.3	5.88	123.25	20	Pf00022	74117	ENSMUSG00000026341	Actr3	mmu:74117; Q99JY9; Q9DC56		Clathrin-mediated endocytosis; Regulation of actin dynamics for phagocytic cup formation; RHO GTPases Activate WASPs and WAVEs; EPHB-mediated forward signaling	4	3
High	Q641P0	Actin-related protein 3B OS=Mus musculus OX=10090 GN=Actr3b PE=1 SV=1	0	31.456	24	10	21	7	418	47.5	6.02	36.69	10	Pf00022	242894	ENSMUSG00000056367	Actr3b	mmu:242894; Q641P0; Q7TSH1			0	0
Low	Q80US4	Actin-related protein 5 OS=Mus musculus OX=10090 GN=Actr5 PE=1 SV=3	0.225	0.793	3	1	1	1	605	67.8	5.19	0	1	Pf00022			Actr5	A2ACC9; Q80US4; Q8BL26		UCH proteinases; DNA Damage Recognition in GG-NER	2	0
Low	Q8R2S9	Actin-related protein 8 OS=Mus musculus OX=10090 GN=Actr8 PE=2 SV=1	0.158	0.982	1	1	1	1	624	70.5	7.77	0	1	Pf00022	56249	ENSMUSG00000015971	Actr8	mmu:56249; Q8R2S9; Q9CYC4		DNA Damage Recognition in GG-NER; UCH proteinases	2	0
High	P11031	Activated RNA polymerase II transcriptional coactivator p15 OS=Mus musculus OX=10090 GN=Sub1 PE=1 SV=3	0.006	3.737	9	1	2	1	127	14.4	9.6	5.7	1	Pf02229	20024	ENSMUSG00000022205	Sub1	mmu:20024; P11031; Q3UJR5; Q543N2			0	0
Medium	A2AH22	Activating molecule in BECN1-regulated autophagy protein 1 OS=Mus musculus OX=10090 GN=Ambra1 PE=1 SV=1	0.016	2.453	1	1	1	1	1300	142.8	7.01	1.63	1		228361	ENSMUSG00000040506	Ambra1	A2AH21; A2AH22; A2AH24; mmu:228361; Q3TF60; Q3U239; Q3UF70; Q6ZPJ1; Q8BJJ8; Q8BYW8		Macroautophagy	1	0
High	Q9D8Z1	Activating signal cointegrator 1 complex subunit 1 OS=Mus musculus OX=10090 GN=Ascc1 PE=1 SV=1	0.003	4.732	3	1	2	1	356	41.3	6.54	2.41	1	Pf00013, Pf10469	69090	ENSMUSG00000044475	Ascc1	mmu:69090; Q3TAC2; Q9D8Z1	EDA Signalling in Hair Follicle Development		1	0
High	E9PZJ8	Activating signal cointegrator 1 complex subunit 3 OS=Mus musculus OX=10090 GN=Ascc3 PE=1 SV=1	0	13.251	2	5	6	5	2198	250.4	7.02	11.7	5	Pf00270, Pf00271, Pf02889	77987	ENSMUSG00000038774	Ascc3	E9PZJ8; mmu:77987; Q6PB36; Q8C1G1; Q8C707; Q8K292			0	0
High	Q9QXN3	Activating signal cointegrator 1 OS=Mus musculus OX=10090 GN=Trip4 PE=1 SV=2	0	5.804	8	3	3	3	581	66.2	7.55	3.41	3	Pf06221	56404	ENSMUSG00000032386	Trip4	E9QK64; mmu:56404; Q8CAD5; Q9QXN3			0	0
High	Q8BK64	Activator of 90 kDa heat shock protein ATPase homolog 1 OS=Mus musculus OX=10090 GN=Ahsa1 PE=1 SV=2	0	19.997	29	8	18	8	338	38.1	5.53	41.67	8	Pf09229	217737	ENSMUSG00000021037	Ahsa1	mmu:217737; Q8BK64; Q8R3E6			0	0
Low	Q9QYL7	Activator of basal transcription 1 OS=Mus musculus OX=10090 GN=Abt1 PE=2 SV=1	0.193	0.872	3	1	1	1	269	30.6	10.01	0	1		30946	ENSMUSG00000036376	Abt1	mmu:30946; Q0VGU7; Q9D762; Q9QYL7			0	0
High	Q5SSL4	Active breakpoint cluster region-related protein OS=Mus musculus OX=10090 GN=Abr PE=1 SV=1	0	84.934	30	22	47	19	859	97.6	6.58	107.03	22	Pf00168	109934	ENSMUSG00000017631	Abr	mmu:109934; Q3U5G0; Q3UQJ6; Q3UY38; Q5SSL4; Q5SYJ5; Q5SYJ7; Q5SYJ8; Q5SYJ9; Q6PCY1; Q6PDH3		RHOA GTPase cycle; RHOB GTPase cycle; CDC42 GTPase cycle; RAC1 GTPase cycle; RAC2 GTPase cycle; RAC3 GTPase cycle; NRAGE signals death through JNK; G alpha (12/13) signalling events; RHOC GTPase cycle	9	3
High	Q9Z103	Activity-dependent neuroprotector homeobox protein OS=Mus musculus OX=10090 GN=Adnp PE=1 SV=2	0	11.637	5	4	7	4	1108	124.2	6.86	16.46	4	Pf00046, Pf19627	11538	ENSMUSG00000051149	Adnp	A2BDX0; mmu:11538; Q9Z103			0	0
Low	Q9WV31	Activity-regulated cytoskeleton-associated protein OS=Mus musculus OX=10090 GN=Arc PE=1 SV=1	0.096	1.298	2	1	1	1	396	45.3	5.39	1.78	1	Pf18162	11838	ENSMUSG00000022602	Arc	mmu:11838; Q9ES15; Q9WV31	Serotonin and anxiety-related events; Serotonin and anxiety		2	0
High	Q920L1	Acyl-CoA (8-3)-desaturase OS=Mus musculus OX=10090 GN=Fads1 PE=1 SV=1	0.003	4.534	4	2	3	2	447	52.3	9.29	3.81	2	Pf00173, Pf00487	76267	ENSMUSG00000010663	Fads1	mmu:76267; Q3U494; Q8BZX7; Q8R0G8; Q8VC07; Q920L1	Selenium Micronutrient Network; Cholesterol metabolism (includes both Bloch and Kandutsch-Russell pathways); Omega-3/Omega-6 FA synthesis; Omega-9 FA synthesis	Linoleic acid (LA) metabolism; alpha-linolenic acid (ALA) metabolism	6	0
High	Q9Z0R9	Acyl-CoA 6-desaturase OS=Mus musculus OX=10090 GN=Fads2 PE=1 SV=1	0	12.519	10	4	8	4	444	52.4	8.82	12.86	4	Pf00173, Pf00487	56473	ENSMUSG00000024665	Fads2	mmu:56473; Q9Z0R9	Selenium Micronutrient Network; Folic Acid Network; PPAR signaling pathway; Cholesterol metabolism (includes both Bloch and Kandutsch-Russell pathways); Omega-3/Omega-6 FA synthesis; Omega-9 FA synthesis	alpha-linolenic acid (ALA) metabolism; Linoleic acid (LA) metabolism	8	0
High	Q5XG73	Acyl-CoA-binding domain-containing protein 5 OS=Mus musculus OX=10090 GN=Acbd5 PE=1 SV=1	0.005	3.876	3	2	3	2	508	56.6	5.41	3.32	2	Pf00887	74159	ENSMUSG00000026781	Acbd5	A2AQX9; A2AQY0; mmu:74159; Q5XG73; Q6P7V7; Q7TSC2; Q8BKU6; Q8CI99; Q9CW41		RHOA GTPase cycle; RHOC GTPase cycle; Peroxisomal lipid metabolism; Class I peroxisomal membrane protein import	4	0
Medium	Q9D061	Acyl-CoA-binding domain-containing protein 6 OS=Mus musculus OX=10090 GN=Acbd6 PE=1 SV=2	0.016	2.442	6	1	2	1	282	30.9	5.11	5.21	1	Pf00887	72482	ENSMUSG00000033701	Acbd6	mmu:72482; Q3TMN7; Q9D061; Q9DCU4		Mitochondrial Fatty Acid Beta-Oxidation	1	0
High	P31786	Acyl-CoA-binding protein OS=Mus musculus OX=10090 GN=Dbi PE=1 SV=2	0.009	3.364	21	1	1	1	87	10	8.82	2.94	1	Pf00887	13167	ENSMUSG00000026385	Dbi	mmu:13167; P31786	PPAR signaling pathway	Mitochondrial Fatty Acid Beta-Oxidation	2	0
High	Q91YX5	Acyl-CoA:lysophosphatidylglycerol acyltransferase 1 OS=Mus musculus OX=10090 GN=Lpgat1 PE=1 SV=1	0.009	3.268	4	1	2	1	370	43.1	8.79	2.45	1	Pf01553, Pf16076	226856	ENSMUSG00000026623	Lpgat1	mmu:226856; Q91YX5		Acyl chain remodelling of PG	1	0
Medium	O55137	Acyl-coenzyme A thioesterase 1 OS=Mus musculus OX=10090 GN=Acot1 PE=1 SV=1	0.011	2.716	2	1	2	1	419	46.1	6.58	1.88	1	Pf04775	26897	ENSMUSG00000072949	Acot1	mmu:26897; O55137; Q549A9	Cholesterol metabolism (includes both Bloch and Kandutsch-Russell pathways); Omega-3/Omega-6 FA synthesis; Omega-9 FA synthesis	Peroxisomal protein import; Mitochondrial Fatty Acid Beta-Oxidation	5	0
High	Q32MW3	Acyl-coenzyme A thioesterase 10, mitochondrial OS=Mus musculus OX=10090 GN=Acot10 PE=2 SV=1	0.007	3.645	4	2	4	2	439	50.5	7.88	3.57	2		64833	ENSMUSG00000047565	Acot10	A0FJF7; mmu:64833; Q32MW2; Q32MW3			0	0
High	Q9CQR4	Acyl-coenzyme A thioesterase 13 OS=Mus musculus OX=10090 GN=Acot13 PE=1 SV=1	0	13.762	21	3	9	3	140	15.2	8.82	11.89	3	Pf03061	66834	ENSMUSG00000006717	Acot13	mmu:66834; Q9CQR4		Mitochondrial Fatty Acid Beta-Oxidation	1	0
Low	P58137	Acyl-coenzyme A thioesterase 8 OS=Mus musculus OX=10090 GN=Acot8 PE=1 SV=1	0.2	0.853	5	1	1	1	320	35.8	7.64	0	1	Pf13622	170789	ENSMUSG00000017307	Acot8	mmu:170789; P58137; Q8VHM4		Peroxisomal protein import; Synthesis of bile acids and bile salts via 7alpha-hydroxycholesterol; Beta-oxidation of pristanoyl-CoA; alpha-linolenic acid (ALA) metabolism; Beta-oxidation of very long chain fatty acids	5	0
High	Q3UUI3	Acyl-coenzyme A thioesterase THEM4 OS=Mus musculus OX=10090 GN=Them4 PE=1 SV=1	0	6.014	17	3	4	3	230	26	9.64	8.24	3	Pf03061	75778	ENSMUSG00000028145	Them4	A3KPD5; mmu:75778; Q3UUI3; Q8BYS9; Q8R234; Q9D5Y3		VEGFR2 mediated vascular permeability; Negative regulation of the PI3K/AKT network; CD28 dependent PI3K/Akt signaling; Mitochondrial Fatty Acid Beta-Oxidation; Activation of AKT2	6	0
High	P97823	Acyl-protein thioesterase 1 OS=Mus musculus OX=10090 GN=Lypla1 PE=1 SV=1	0.004	4.207	7	2	3	2	230	24.7	6.62	6.28	2	Pf02230	18777	ENSMUSG00000025903	Lypla1	mmu:18777; P97823; Q3TJZ0; Q7TPX1; Q8BWM6		RAS processing; eNOS activation	2	0
High	Q9WTL7	Acyl-protein thioesterase 2 OS=Mus musculus OX=10090 GN=Lypla2 PE=1 SV=1	0	12.113	20	5	10	5	231	24.8	7.23	16.98	5	Pf02230	26394	ENSMUSG00000028670	Lypla2	mmu:26394; Q3TJD6; Q9WTL7		L1CAM interactions	1	0
High	Q8R146	Acylamino-acid-releasing enzyme OS=Mus musculus OX=10090 GN=Apeh PE=1 SV=3	0	10.717	6	3	4	3	732	81.5	5.59	11.54	3		235606	ENSMUSG00000032590	Apeh	G3X9I2; mmu:235606; Q8K029; Q8R0M9; Q8R146		Neutrophil degranulation; Eukaryotic Translation Termination	2	0
High	Q9ESW4	Acylglycerol kinase, mitochondrial OS=Mus musculus OX=10090 GN=Agk PE=1 SV=1	0	22.71	23	9	14	9	421	46.9	8.4	19.76	9	Pf00781, Pf19712	69923	ENSMUSG00000029916	Agk	mmu:69923; Q9D087; Q9ESW4		Glycerophospholipid biosynthesis	1	0
Low	P56376	Acylphosphatase-1 OS=Mus musculus OX=10090 GN=Acyp1 PE=1 SV=2	0.078	1.461	7	1	1	1	99	11.2	9.04	1.97	1	Pf00708	66204	ENSMUSG00000008822	Acyp1	mmu:66204; P56376; Q0VG40; Q545K8; Q6P8S7			0	0
High	Q8R0F8	Acylpyruvase FAHD1, mitochondrial OS=Mus musculus OX=10090 GN=Fahd1 PE=1 SV=2	0	6.594	24	3	4	3	227	25.2	7.69	3.98	3		68636	ENSMUSG00000045316	Fahd1	mmu:68636; Q3U020; Q3UQY4; Q8BLJ7; Q8R0F8; Q9JJB2		Citric acid cycle (TCA cycle)	1	0
High	Q64010	Adapter molecule crk OS=Mus musculus OX=10090 GN=Crk PE=1 SV=1	0	31.04	31	6	13	6	304	33.8	5.55	32.83	6		12928	ENSMUSG00000017776	Crk	mmu:12928; Q64010	ErbB signaling pathway; Signaling of Hepatocyte Growth Factor Receptor; Chemokine signaling pathway; IL-3 Signaling Pathway; Kit Receptor Signaling Pathway; IL-2 Signaling Pathway; MAPK signaling pathway; Regulation of Actin Cytoskeleton; EGFR1 Signaling Pathway; Integrin-mediated Cell Adhesion; Insulin Signaling; Focal Adhesion	Regulation of actin dynamics for phagocytic cup formation; p130Cas linkage to MAPK signaling for integrins; VEGFA-VEGFR2 Pathway; Regulation of signaling by CBL; Downstream signal transduction; MET receptor recycling; PTK6 Regulates RHO GTPases, RAS GTPase and MAP kinases; ARMS-mediated activation; MET activates RAP1 and RAC1	21	0
High	Q9CR95	Adaptin ear-binding coat-associated protein 1 OS=Mus musculus OX=10090 GN=Necap1 PE=1 SV=2	0	27.47	37	9	17	9	275	29.6	6.38	33.21	9		67602	ENSMUSG00000030327	Necap1	mmu:67602; Q3TH13; Q78JW3; Q8C4P1; Q9CR95		Golgi Associated Vesicle Biogenesis; Cargo recognition for clathrin-mediated endocytosis	3	0
Medium	Q9D1J1	Adaptin ear-binding coat-associated protein 2 OS=Mus musculus OX=10090 GN=Necap2 PE=1 SV=1	0.012	2.674	10	1	1	1	266	28.6	7.94	2.53	1		66147	ENSMUSG00000028923	Necap2	mmu:66147; Q3U1M1; Q9CV41; Q9D1J1		Cargo recognition for clathrin-mediated endocytosis	2	0
High	P08030	Adenine phosphoribosyltransferase OS=Mus musculus OX=10090 GN=Aprt PE=1 SV=2	0.009	3.104	6	1	2	1	180	19.7	6.79	4.52	1		11821	ENSMUSG00000006589	Aprt	mmu:11821; P08030; Q564P4; Q61319; Q6PK77; Q9DCY3	Purine metabolism	Neutrophil degranulation; Purine salvage	3	0
High	Q9Z1K7	Adenomatous polyposis coli protein 2 OS=Mus musculus OX=10090 GN=Apc2 PE=1 SV=1	0	25.125	5	11	18	10	2274	243	8.88	25.53	11	Pf18797			Apc2	Q9Z1K7			0	0
High	Q61315	Adenomatous polyposis coli protein OS=Mus musculus OX=10090 GN=Apc PE=1 SV=1	0	264.296	29	73	151	72	2845	310.9	7.58	341.59	73	Pf18797			Apc	Q61315; Q62044		Deactivation of the beta-catenin transactivating complex; Ovarian tumor domain proteases; Apoptotic cleavage of cellular proteins; Beta-catenin phosphorylation cascade; Disassembly of the destruction complex and recruitment of AXIN to the membrane	6	1
Medium	P03958	Adenosine deaminase OS=Mus musculus OX=10090 GN=Ada PE=1 SV=3	0.018	2.36	8	2	2	2	352	40	5.72	0	2	Pf00962	11486	ENSMUSG00000017697	Ada	mmu:11486; P03958	Purine metabolism	Purine salvage	2	0
High	P55264	Adenosine kinase OS=Mus musculus OX=10090 GN=Adk PE=1 SV=2	0.006	3.764	4	2	4	2	361	40.1	6.21	8.51	2		11534	ENSMUSG00000039197	Adk	mmu:11534; P55264; Q6JAM3; Q91VJ3	Purine metabolism	Purine salvage	2	0
High	P50247	Adenosylhomocysteinase OS=Mus musculus OX=10090 GN=Ahcy PE=1 SV=3	0	10.141	15	5	7	4	432	47.7	6.54	2.35	5	Pf00670	11615; 269378	ENSMUSG00000027597; ENSMUSG00000048087	Ahcy	mmu:11615; mmu:269378; P50247; Q91WF1	One Carbon Metabolism; Glutathione and one carbon metabolism	Methylation; Sulfur amino acid metabolism	4	0
High	O88444	Adenylate cyclase type 1 OS=Mus musculus OX=10090 GN=Adcy1 PE=1 SV=2	0	37.364	14	12	20	12	1118	123.3	8.47	32.48	12	Pf00211	432530	ENSMUSG00000020431	Adcy1	mmu:432530; O88444; Q5SS89	Hypothetical Network for Drug Addiction; Purine metabolism; Chemokine signaling pathway; G Protein Signaling Pathways; Myometrial Relaxation and Contraction Pathways; Calcium Regulation in the Cardiac Cell	Hedgehog 'off' state; Adenylate cyclase inhibitory pathway; G alpha (z) signalling events; PKA activation; Adenylate cyclase activating pathway	11	0
Low	Q80TL1	Adenylate cyclase type 2 OS=Mus musculus OX=10090 GN=Adcy2 PE=1 SV=2	0.232	0.778	1	1	1	1	1090	123.2	8.31	0	1	Pf00211, Pf06327			Adcy2	Q80TL1; Q8CFU6		Hedgehog 'off' state; G alpha (z) signalling events; Adenylate cyclase inhibitory pathway; PKA activation; Adenylate cyclase activating pathway	5	0
High	Q8VHH7	Adenylate cyclase type 3 OS=Mus musculus OX=10090 GN=Adcy3 PE=1 SV=2	0	7.485	2	2	3	2	1145	129	6.29	7.92	2	Pf00211	104111	ENSMUSG00000020654	Adcy3	B8JK57; mmu:104111; Q8VHH7	Purine metabolism; Chemokine signaling pathway; G Protein Signaling Pathways; Myometrial Relaxation and Contraction Pathways; Calcium Regulation in the Cardiac Cell	Hedgehog 'off' state; G alpha (z) signalling events; Adenylate cyclase inhibitory pathway; PKA activation; Adenylate cyclase activating pathway	10	0
High	P84309	Adenylate cyclase type 5 OS=Mus musculus OX=10090 GN=Adcy5 PE=1 SV=2	0	48.029	16	17	30	12	1262	139	7.06	61	17	Pf00211, Pf06327	224129	ENSMUSG00000022840	Adcy5	mmu:224129; P84309; Q3TU67; Q3UH09; Q5BL06	Purine metabolism; Chemokine signaling pathway; G Protein Signaling Pathways; Myometrial Relaxation and Contraction Pathways; Calcium Regulation in the Cardiac Cell	Hedgehog 'off' state; Adenylate cyclase inhibitory pathway; G alpha (z) signalling events; PKA activation; Adenylate cyclase activating pathway; Adrenaline,noradrenaline inhibits insulin secretion	11	5
High	Q01341	Adenylate cyclase type 6 OS=Mus musculus OX=10090 GN=Adcy6 PE=1 SV=1	0	11.917	6	6	10	1	1165	130.2	7.87	20.02	6	Pf00211, Pf06327	11512		Adcy6	mmu:11512; Q01341	Purine metabolism; Chemokine signaling pathway; G Protein Signaling Pathways	Hedgehog 'off' state; PKA activation; Adrenaline,noradrenaline inhibits insulin secretion; G alpha (z) signalling events; Adenylate cyclase inhibitory pathway; Adenylate cyclase activating pathway	9	0
Medium	P97490	Adenylate cyclase type 8 OS=Mus musculus OX=10090 GN=Adcy8 PE=1 SV=2	0.012	2.675	1	2	2	2	1249	140	6.93	0	2	Pf00211, Pf06327	11514	ENSMUSG00000022376	Adcy8	G3X8V9; mmu:11514; P97490	Hypothetical Network for Drug Addiction; Purine metabolism; Chemokine signaling pathway; G Protein Signaling Pathways; Myometrial Relaxation and Contraction Pathways; Calcium Regulation in the Cardiac Cell	Hedgehog 'off' state; PKA activation; G alpha (z) signalling events; Adenylate cyclase inhibitory pathway; Adenylate cyclase activating pathway	11	0
High	P51830	Adenylate cyclase type 9 OS=Mus musculus OX=10090 GN=Adcy9 PE=1 SV=1	0	70.471	17	20	36	20	1353	150.9	7.21	70.34	20	Pf00211	11515	ENSMUSG00000005580	Adcy9	mmu:11515; P51830; Q61279	Purine metabolism; Chemokine signaling pathway; G Protein Signaling Pathways; Myometrial Relaxation and Contraction Pathways; Calcium Regulation in the Cardiac Cell	Hedgehog 'off' state; G alpha (z) signalling events; Adenylate cyclase inhibitory pathway; PKA activation; Adenylate cyclase activating pathway	10	0
High	Q9WTP6	Adenylate kinase 2, mitochondrial OS=Mus musculus OX=10090 GN=Ak2 PE=1 SV=5	0	9.822	17	3	4	3	239	26.5	7.39	7.34	3	Pf00406, Pf05191	11637	ENSMUSG00000028792	Ak2	A2A820; mmu:11637; Q3THT3; Q3TI11; Q3TKI6; Q8C7I9; Q9CY37; Q9WTP6	Purine metabolism	Interconversion of nucleotide di- and triphosphates	2	0
High	Q9WUR9	Adenylate kinase 4, mitochondrial OS=Mus musculus OX=10090 GN=Ak4 PE=1 SV=1	0	6.517	19	4	4	4	223	25	7.53	6.69	4	Pf05191	11639	ENSMUSG00000028527	Ak4	mmu:11639; Q9R1X7; Q9WUR9	Purine metabolism	Interconversion of nucleotide di- and triphosphates	2	0
High	Q9R0Y5	Adenylate kinase isoenzyme 1 OS=Mus musculus OX=10090 GN=Ak1 PE=1 SV=1	0	24.382	42	7	16	6	194	21.5	5.81	37.89	7		11636	ENSMUSG00000026817	Ak1	A2AK80; mmu:11636; Q542C5; Q9R0Y4; Q9R0Y5	Purine metabolism	Interconversion of nucleotide di- and triphosphates	2	1
High	Q920P5	Adenylate kinase isoenzyme 5 OS=Mus musculus OX=10090 GN=Ak5 PE=1 SV=2	0	18.018	11	6	14	5	562	63.3	5.29	23.83	6	Pf00406	229949	ENSMUSG00000039058	Ak5	mmu:229949; Q920P5	Purine metabolism	Interconversion of nucleotide di- and triphosphates	2	0
High	P54822	Adenylosuccinate lyase OS=Mus musculus OX=10090 GN=Adsl PE=1 SV=2	0	6.366	4	2	3	2	484	54.8	7.27	7.95	2		11564	ENSMUSG00000022407	Adsl	mmu:11564; P54822; Q8VCD4	Purine metabolism; Nucleotide Metabolism	Purine ribonucleoside monophosphate biosynthesis	3	0
High	P28650	Adenylosuccinate synthetase isozyme 1 OS=Mus musculus OX=10090 GN=Adss1 PE=1 SV=2	0	8.633	7	2	4	1	457	50.2	8.43	5.31	2		11565	ENSMUSG00000011148	Adss1	mmu:11565; P28650; Q8CHQ1	Purine metabolism	Purine ribonucleoside monophosphate biosynthesis	2	0
High	P46664	Adenylosuccinate synthetase isozyme 2 OS=Mus musculus OX=10090 GN=Adss2 PE=1 SV=2	0	36.99	36	12	23	11	456	50	6.38	39.37	12		11566	ENSMUSG00000015961	Adss2	mmu:11566; P46664; Q9CQL9	Purine metabolism; Nucleotide Metabolism	Purine ribonucleoside monophosphate biosynthesis	3	1
High	P40124	Adenylyl cyclase-associated protein 1 OS=Mus musculus OX=10090 GN=Cap1 PE=1 SV=4	0	97.658	50	21	59	20	474	51.5	7.52	151.45	21		12331	ENSMUSG00000028656	Cap1	mmu:12331; P40124; Q8BPT7	Insulin Signaling	Neutrophil degranulation	2	1
High	Q9CYT6	Adenylyl cyclase-associated protein 2 OS=Mus musculus OX=10090 GN=Cap2 PE=1 SV=1	0	46.504	35	14	36	13	476	52.8	6.43	77.1	14		67252	ENSMUSG00000021373	Cap2	mmu:67252; Q80YU7; Q9CYT6; Q9D6L0			0	0
High	Q3UHD1	Adhesion G protein-coupled receptor B1 OS=Mus musculus OX=10090 GN=Adgrb1 PE=1 SV=1	0	19.345	6	8	11	8	1582	173.2	7.56	21.06	8	Pf00002, Pf01825, Pf02793, Pf16489	107831	ENSMUSG00000034730	Adgrb1	mmu:107831; Q3UH36; Q3UHD1; Q8CGM0	Non-odorant GPCRs		1	0
High	Q8CGM1	Adhesion G protein-coupled receptor B2 OS=Mus musculus OX=10090 GN=Adgrb2 PE=1 SV=2	0.004	4.095	2	2	4	1	1561	169.8	7.36	6.83	2	Pf00002, Pf01825, Pf16489	230775	ENSMUSG00000028782	Adgrb2	B1ASB7; B1ASB8; B2FDE3; mmu:230775; Q3TYC8; Q3UN11; Q3UNE2; Q6PGN0; Q8CGM1	Non-odorant GPCRs		1	0
High	Q80ZF8	Adhesion G protein-coupled receptor B3 OS=Mus musculus OX=10090 GN=Adgrb3 PE=1 SV=2	0	12.397	5	5	8	4	1522	171.2	7.02	17.46	5	Pf00002, Pf01825, Pf02793, Pf16489	210933	ENSMUSG00000033569	Adgrb3	G3XA05; mmu:210933; Q80ZF8	Non-odorant GPCRs		1	1
Low	Q61549	Adhesion G protein-coupled receptor E1 OS=Mus musculus OX=10090 GN=Adgre1 PE=1 SV=1	0.177	0.917	2	1	2	1	931	102.1	5.07	4.9	1	Pf00002, Pf01825, Pf07645, Pf12662	13733	ENSMUSG00000004730	Adgre1	mmu:13733; Q61549	Non-odorant GPCRs; GPCRs, Class B Secretin-like	Class B/2 (Secretin family receptors)	3	0
High	Q80TR1	Adhesion G protein-coupled receptor L1 OS=Mus musculus OX=10090 GN=Adgrl1 PE=1 SV=2	0	50.957	12	15	48	14	1466	161.6	6.48	94.12	15	Pf00002, Pf01825, Pf02191, Pf02793, Pf16489	330814	ENSMUSG00000013033	Adgrl1	mmu:330814; Q3UH90; Q7TNE5; Q80T49; Q80TR1	Non-odorant GPCRs; GPCRs, Class B Secretin-like		2	1
High	Q8JZZ7	Adhesion G protein-coupled receptor L2 OS=Mus musculus OX=10090 GN=Adgrl2 PE=1 SV=3	0	13.066	5	6	15	5	1487	166.5	6.71	22.14	6	Pf00002, Pf01825, Pf02191, Pf02793, Pf16489		ENSMUSG00000028184	Adgrl2	E9Q6C7; Q8BM90; Q8JZZ7	Non-odorant GPCRs		1	0
High	Q80TS3	Adhesion G protein-coupled receptor L3 OS=Mus musculus OX=10090 GN=Adgrl3 PE=1 SV=3	0	15.111	5	7	13	7	1537	171	6.71	20.62	7	Pf00002, Pf01825, Pf02191, Pf16489	319387	ENSMUSG00000037605	Adgrl3	mmu:319387; Q3UHI7; Q3UM79; Q504Z9; Q5HZJ6; Q80T56; Q80TS3	Non-odorant GPCRs; GPCRs, Class B Secretin-like		2	0
Low	Q8K209	Adhesion G-protein coupled receptor G1 OS=Mus musculus OX=10090 GN=Adgrg1 PE=1 SV=1	0.196	0.866	1	1	1	1	687	77.2	8.59	0	1	Pf00002, Pf01825, Pf18587, Pf18619	14766	ENSMUSG00000031785	Adgrg1	mmu:14766; Q3UR17; Q8K209; Q9QZT2	Non-odorant GPCRs; GPCRs, Other		2	0
Low	B7ZCC9	Adhesion G-protein coupled receptor G4 OS=Mus musculus OX=10090 GN=Adgrg4 PE=3 SV=1	0.184	0.894	0	1	1	1	3073	334	6.62	0	1	Pf00002, Pf01825		ENSMUSG00000053852	Adgrg4	B7ZCC9; B7ZCD0	Odorant GPCRs; Orphan GPCRs		2	0
Low	Q8VHN7	Adhesion G-protein coupled receptor V1 OS=Mus musculus OX=10090 GN=Adgrv1 PE=1 SV=1	0.258	0.717	0	1	1	1	6298	687	4.75	0	1	Pf00002, Pf03160		ENSMUSG00000069170	Adgrv1	Q6ZQ69; Q810D2; Q810D3; Q8VHN7; Q91ZS0; Q91ZS1			0	0
High	Q9D7N9	Adipocyte plasma membrane-associated protein OS=Mus musculus OX=10090 GN=Apmap PE=1 SV=1	0	7.283	9	4	8	4	415	46.4	6.32	6.92	4	Pf20067	71881	ENSMUSG00000033096	Apmap	A2AQX3; mmu:71881; Q3U4F4; Q9D7N9			0	0
High	C0HK80	Adipocyte-related X-chromosome expressed sequence 2 OS=Mus musculus OX=10090 GN=Arxes2 PE=1 SV=1	0	6.812	12	2	4	2	180	20.1	9.6	4.78	2	Pf04573	76219; 76976	ENSMUSG00000048040; ENSMUSG00000048355	Arxes2	B1AUR7; C0HK80; mmu:76219; mmu:76976; Q8BK31; Q9D365; Q9D6F2			0	0
High	Q91VH1	Adiponectin receptor protein 1 OS=Mus musculus OX=10090 GN=Adipor1 PE=1 SV=1	0.003	4.597	8	2	4	2	375	42.3	7.02	6.93	2		72674	ENSMUSG00000026457	Adipor1	mmu:72674; Q91VH1; Q9CZA0	Leptin and adiponectin	AMPK inhibits chREBP transcriptional activation activity	2	0
Low	Q8CG72	ADP-ribose glycohydrolase ARH3 OS=Mus musculus OX=10090 GN=Adprhl2 PE=1 SV=1	0.053	1.701	9	2	2	2	370	39.4	4.96	0	2		100206	ENSMUSG00000042558	Adprs	A3KFY3; mmu:100206; Q80UW9; Q8CG72; Q8R575; Q921U6		POLB-Dependent Long Patch Base Excision Repair	1	0
High	Q3UYG8	ADP-ribose glycohydrolase MACROD2 OS=Mus musculus OX=10090 GN=Macrod2 PE=1 SV=1	0	9.009	5	2	5	2	475	52.1	4.75	10.96	2	Pf01661	72899	ENSMUSG00000068205	Macrod2	mmu:72899; Q3UYG8			0	0
High	Q8BSL7	ADP-ribosylation factor 2 OS=Mus musculus OX=10090 GN=Arf2 PE=1 SV=2	0	41.297	62	10	56	1	181	20.7	6.58	118.87	10	Pf00025	11841	ENSMUSG00000062421	Arf2	mmu:11841; P10947; P16500; Q3TJ37; Q8BSL7; Q91VR9			0	0
High	P61205	ADP-ribosylation factor 3 OS=Mus musculus OX=10090 GN=Arf3 PE=2 SV=2	0	46.82	67	11	63	1	181	20.6	7.43	125.28	11	Pf00025	11842	ENSMUSG00000051853	Arf3	mmu:11842; P16587; P61205		COPI-dependent Golgi-to-ER retrograde traffic; COPI-mediated anterograde transport; Synthesis of PIPs at the Golgi membrane	3	10
High	P61750	ADP-ribosylation factor 4 OS=Mus musculus OX=10090 GN=Arf4 PE=1 SV=2	0	28.938	50	8	31	3	180	20.4	7.14	53.19	8	Pf00025	11843	ENSMUSG00000021877; ENSMUSG00000115861	Arf4	mmu:11843; P36403; P61750; Q3TGC2; Q9CXX3	EGFR1 Signaling Pathway	COPI-dependent Golgi-to-ER retrograde traffic; COPI-mediated anterograde transport; VxPx cargo-targeting to cilium	4	0
High	P84084	ADP-ribosylation factor 5 OS=Mus musculus OX=10090 GN=Arf5 PE=1 SV=2	0	44.036	56	10	43	4	180	20.5	6.79	84.51	10	Pf00025	11844	ENSMUSG00000020440	Arf5	A2RTC5; mmu:11844; P26437; P84084		COPI-dependent Golgi-to-ER retrograde traffic; COPI-mediated anterograde transport	2	0
High	P62331	ADP-ribosylation factor 6 OS=Mus musculus OX=10090 GN=Arf6 PE=1 SV=2	0	8.471	30	4	8	3	175	20.1	8.95	12.25	4	Pf00025	11845	ENSMUSG00000044147	Arf6	mmu:11845; P26438; P62331	Insulin Signaling	Clathrin-mediated endocytosis; TBC/RABGAPs; MET receptor recycling	4	0
High	Q9EPJ9	ADP-ribosylation factor GTPase-activating protein 1 OS=Mus musculus OX=10090 GN=Arfgap1 PE=1 SV=2	0	98.316	47	18	43	18	414	45.3	5.57	104.65	18		228998	ENSMUSG00000027575	Arfgap1	A8WIR9; A8WIS1; mmu:228998; Q3TI52; Q8BMM6; Q8BMQ7; Q9EPJ9		COPI-dependent Golgi-to-ER retrograde traffic; COPI-mediated anterograde transport; Clathrin-mediated endocytosis	3	0
High	Q99K28	ADP-ribosylation factor GTPase-activating protein 2 OS=Mus musculus OX=10090 GN=Arfgap2 PE=1 SV=1	0	23.923	16	8	20	8	520	56.6	8.18	29.81	8		77038	ENSMUSG00000027255	Arfgap2	mmu:77038; Q99K28; Q9D758; Q9JIH1		CDC42 GTPase cycle; COPI-dependent Golgi-to-ER retrograde traffic; COPI-mediated anterograde transport	3	0
High	Q9D8S3	ADP-ribosylation factor GTPase-activating protein 3 OS=Mus musculus OX=10090 GN=Arfgap3 PE=1 SV=2	0	26.844	18	7	15	7	523	57.4	8.47	28.11	7		66251	ENSMUSG00000054277	Arfgap3	mmu:66251; Q544V6; Q8BW06; Q99KN8; Q9D8S3		CDC42 GTPase cycle; COPI-dependent Golgi-to-ER retrograde traffic; COPI-mediated anterograde transport; RHOG GTPase cycle	4	0
High	Q8R0H9	ADP-ribosylation factor-binding protein GGA1 OS=Mus musculus OX=10090 GN=Gga1 PE=1 SV=1	0.003	4.66	4	3	3	2	635	69.9	5.27	2.05	3	Pf02883, Pf03127, Pf18308	106039	ENSMUSG00000033128	Gga1	mmu:106039; Q3U2N1; Q8R0H9			0	0
High	Q6P5E6	ADP-ribosylation factor-binding protein GGA2 OS=Mus musculus OX=10090 GN=Gga2 PE=1 SV=1	0.004	4.227	8	3	3	2	603	66	7.3	0	3	Pf02883, Pf03127, Pf18308	74105	ENSMUSG00000030872	Gga2	mmu:74105; Q3U374; Q6P5E6; Q6PFX3; Q6ZPY8; Q8BM76; Q9DC15			0	0
High	Q8BMI3	ADP-ribosylation factor-binding protein GGA3 OS=Mus musculus OX=10090 GN=Gga3 PE=1 SV=2	0	20.18	10	6	8	5	718	77.9	5.66	14.93	6	Pf02883, Pf03127, Pf18308	260302	ENSMUSG00000020740	Gga3	mmu:260302; Q3V1Y0; Q80U71; Q8BMI3		MET receptor recycling	1	0
Medium	P61211	ADP-ribosylation factor-like protein 1 OS=Mus musculus OX=10090 GN=Arl1 PE=1 SV=1	0.039	1.903	6	1	1	1	181	20.4	5.72	2.18	1	Pf00025	104303	ENSMUSG00000060904	Arl1	mmu:104303; P41276; P61211		Retrograde transport at the Trans-Golgi-Network	1	0
High	Q8BGR6	ADP-ribosylation factor-like protein 15 OS=Mus musculus OX=10090 GN=Arl15 PE=1 SV=1	0.004	4.033	9	2	6	2	204	22.9	5.29	9.07	2	Pf00025	218639	ENSMUSG00000042348	Arl15	mmu:218639; Q8BGR6			0	0
High	Q9D0J4	ADP-ribosylation factor-like protein 2 OS=Mus musculus OX=10090 GN=Arl2 PE=1 SV=1	0.002	4.99	11	2	7	2	184	20.9	5.96	13.38	2	Pf00025	56327	ENSMUSG00000024944	Arl2	mmu:56327; Q9D0J4; Q9WUM1		RAS processing; Transport of nucleosides and free purine and pyrimidine bases across the plasma membrane	2	0
High	Q9WUL7	ADP-ribosylation factor-like protein 3 OS=Mus musculus OX=10090 GN=Arl3 PE=1 SV=1	0	13.458	31	4	7	4	182	20.5	7.24	17.07	4	Pf00025	56350	ENSMUSG00000025035	Arl3	mmu:56350; Q9WUL7		Trafficking of myristoylated proteins to the cilium	1	0
Medium	O88848	ADP-ribosylation factor-like protein 6 OS=Mus musculus OX=10090 GN=Arl6 PE=1 SV=1	0.038	1.933	11	1	1	1	186	20.9	8.25	0	1	Pf00025	56297	ENSMUSG00000022722	Arl6	mmu:56297; O88848; Q3TY77		BBSome-mediated cargo-targeting to cilium	1	0
High	Q9JKW0	ADP-ribosylation factor-like protein 6-interacting protein 1 OS=Mus musculus OX=10090 GN=Arl6ip1 PE=1 SV=1	0.009	3.216	12	3	4	3	203	23.4	9.32	2.08	3		54208	ENSMUSG00000030654	Arl6ip1	mmu:54208; Q9JKW0; Q9JLI9; Q9WUG3			0	0
High	Q8VEH3	ADP-ribosylation factor-like protein 8A OS=Mus musculus OX=10090 GN=Arl8a PE=1 SV=1	0	33.302	30	6	21	3	186	21.4	7.77	49.23	6	Pf00025	68724	ENSMUSG00000026426	Arl8a	mmu:68724; Q8VEH3; Q99KS1; Q9CTB0		Neutrophil degranulation	1	2
High	Q9CQW2	ADP-ribosylation factor-like protein 8B OS=Mus musculus OX=10090 GN=Arl8b PE=1 SV=1	0	17.744	21	5	12	2	186	21.5	8.43	21.54	5	Pf00025	67166	ENSMUSG00000030105	Arl8b	mmu:67166; Q3TXD7; Q3U769; Q3UBB1; Q3UJU2; Q9CQW2			0	0
High	Q9JKX6	ADP-sugar pyrophosphatase OS=Mus musculus OX=10090 GN=Nudt5 PE=1 SV=1	0.009	3.103	8	2	4	2	218	24	5.48	1.65	2		53893	ENSMUSG00000025817	Nudt5	A2ATT6; mmu:53893; Q99KM4; Q9JKX6	Purine metabolism	Phosphate bond hydrolysis by NUDT proteins	2	0
High	P48962	ADP/ATP translocase 1 OS=Mus musculus OX=10090 GN=Slc25a4 PE=1 SV=4	0	63.444	47	17	47	12	298	32.9	9.72	83.15	17	Pf00153	11739	ENSMUSG00000031633	Slc25a4	mmu:11739; P48962; Q62164	Electron Transport Chain; mRNA processing	Transport of nucleosides and free purine and pyrimidine bases across the plasma membrane	3	5
High	P51881	ADP/ATP translocase 2 OS=Mus musculus OX=10090 GN=Slc25a5 PE=1 SV=3	0	41.42	43	14	36	9	298	32.9	9.73	60.96	14	Pf00153	11740	ENSMUSG00000016319	Slc25a5	mmu:11740; P51881; Q61311	Electron Transport Chain	Transport of nucleosides and free purine and pyrimidine bases across the plasma membrane	2	0
High	Q3V132	ADP/ATP translocase 4 OS=Mus musculus OX=10090 GN=Slc25a31 PE=1 SV=1	0.001	5.451	7	3	13	1	320	35.2	9.58	16.85	3	Pf00153	73333	ENSMUSG00000069041; ENSMUSG00000116218	Slc25a31	mmu:73333; Q3V132; Q80W28			0	0
Low	P51827	AF4/FMR2 family member 3 OS=Mus musculus OX=10090 GN=Aff3 PE=1 SV=2	0.102	1.258	1	1	1	1	1254	136	8.15	0	1	Pf05110, Pf18875		ENSMUSG00000037138	Aff3	P51827; Q80WS6			0	0
High	Q9QZQ1	Afadin OS=Mus musculus OX=10090 GN=Afdn PE=1 SV=3	0	201.861	34	58	99	58	1820	206.4	6.32	195.33	58	Pf00498, Pf00595, Pf00788, Pf01843	17356	ENSMUSG00000068036	Afdn	mmu:17356; Q9QZQ1		Adherens junctions interactions	1	0
High	Q8JZQ2	AFG3-like protein 2 OS=Mus musculus OX=10090 GN=Afg3l2 PE=1 SV=1	0	12.796	8	5	6	4	802	89.5	8.6	4.61	5	Pf00004, Pf01434	69597	ENSMUSG00000024527	Afg3l2	mmu:69597; Q8JZQ2	mRNA processing	Processing of SMDT1	2	0
High	Q8CG76	Aflatoxin B1 aldehyde reductase member 2 OS=Mus musculus OX=10090 GN=Akr7a2 PE=1 SV=3	0.001	5.73	5	1	2	1	367	40.6	8.12	6.43	1		110198	ENSMUSG00000028743	Akr7a2	A2AMV3; mmu:110198; Q3UPU2; Q8CG76; Q8CG77; Q8JZQ8; Q9D157	Metapathway biotransformation; Aflatoxin B1 metabolism	Aflatoxin activation and detoxification	3	0
High	Q80WT5	Aftiphilin OS=Mus musculus OX=10090 GN=Aftph PE=1 SV=2	0	23.576	13	9	12	9	931	101.1	4.5	22.23	9	Pf15045	216549	ENSMUSG00000049659	Aftph	mmu:216549; Q5SSE6; Q80WT5; Q99KJ1			0	0
High	A2ASQ1	Agrin OS=Mus musculus OX=10090 GN=Agrn PE=1 SV=1	0	10.265	3	3	3	3	1950	207.4	6.32	6.77	3	Pf00008, Pf00050, Pf00053, Pf00054, Pf07648		ENSMUSG00000041936	Agrn	A2ASP9; A2ASQ0; A2ASQ1; B2RWU1	Primary Focal Segmental Glomerulosclerosis FSGS	ECM proteoglycans; Retinoid metabolism and transport; A tetrasaccharide linker sequence is required for GAG synthesis; HS-GAG biosynthesis; HS-GAG degradation	6	0
High	O08915	AH receptor-interacting protein OS=Mus musculus OX=10090 GN=Aip PE=1 SV=1	0	18.186	22	5	5	5	330	37.6	6.4	10.45	5	Pf00254	11632	ENSMUSG00000024847; ENSMUSG00000097319	Aip	mmu:11632; O08915; Q3UJM2		Aryl hydrocarbon receptor signalling	1	0
High	Q64362	AKT-interacting protein OS=Mus musculus OX=10090 GN=Aktip PE=1 SV=1	0.007	3.519	7	1	1	1	292	32.9	9.31	3.53	1		14339	ENSMUSG00000031667	Aktip	mmu:14339; Q3TYE3; Q64362			0	0
Low	Q8QZR5	Alanine aminotransferase 1 OS=Mus musculus OX=10090 GN=Gpt PE=1 SV=3	0.171	0.936	2	1	1	1	496	55.1	6.64	0	1		76282	ENSMUSG00000022546	Gpt	mmu:76282; Q8QZR5	Alanine and aspartate metabolism	Alanine metabolism	2	0
Low	Q3UEG6	Alanine--glyoxylate aminotransferase 2, mitochondrial OS=Mus musculus OX=10090 GN=Agxt2 PE=1 SV=1	0.069	1.544	4	1	1	1	513	57.1	7.93	2.05	1	Pf00202	268782	ENSMUSG00000089678	Agxt2	B9EIZ8; mmu:268782; Q3UEG6	One carbon metabolism and related pathways	Glyoxylate metabolism and glycine degradation	2	0
High	Q8BGQ7	Alanine--tRNA ligase, cytoplasmic OS=Mus musculus OX=10090 GN=Aars PE=1 SV=1	0	122.057	37	33	75	33	968	106.8	5.67	150.97	33	Pf01411, Pf02272, Pf07973	234734	ENSMUSG00000031960	Aars1	mmu:234734; Q8BGQ7; Q8BXR0			0	0
High	Q3THG9	Alanyl-tRNA editing protein Aarsd1 OS=Mus musculus OX=10090 GN=Aarsd1 PE=1 SV=2	0	16.287	15	5	7	5	412	44.9	6.42	17.12	5	Pf07973	69684	ENSMUSG00000075528	Aarsd1	mmu:69684; Q3THG9; Q3UWH8; Q8BVJ6; Q99JS9			0	0
Low	P00329	Alcohol dehydrogenase 1 OS=Mus musculus OX=10090 GN=Adh1 PE=1 SV=2	0.192	0.877	2	1	1	1	375	39.7	8.1	0	1	Pf00107, Pf08240	11522	ENSMUSG00000074207	Adh1	mmu:11522; P00329	Retinol metabolism	RA biosynthesis pathway; Abacavir metabolism; Ethanol oxidation	4	0
High	P28474	Alcohol dehydrogenase class-3 OS=Mus musculus OX=10090 GN=Adh5 PE=1 SV=3	0	25.802	21	8	16	8	374	39.5	7.25	32.75	8	Pf00107, Pf08240	11532	ENSMUSG00000028138	Adh5	mmu:11532; P28474; Q3TW83; Q8C662		Ethanol oxidation	1	0
High	P47740	Aldehyde dehydrogenase family 3 member A2 OS=Mus musculus OX=10090 GN=Aldh3a2 PE=1 SV=2	0	16.225	13	5	8	5	484	53.9	8.35	17.07	5	Pf00171	11671	ENSMUSG00000010025	Aldh3a2	mmu:11671; P47740; Q99L64	Tryptophan metabolism	RND2 GTPase cycle; RND1 GTPase cycle; Insertion of tail-anchored proteins into the endoplasmic reticulum membrane; Sphingolipid de novo biosynthesis; Alpha-oxidation of phytanate; Class I peroxisomal membrane protein import	7	0
High	Q9CZS1	Aldehyde dehydrogenase X, mitochondrial OS=Mus musculus OX=10090 GN=Aldh1b1 PE=1 SV=1	0	16.126	16	8	12	7	519	57.5	7.02	15.46	8	Pf00171	72535	ENSMUSG00000035561	Aldh1b1	mmu:72535; Q3UAH5; Q9CZS1		Ethanol oxidation	1	0
High	P47738	Aldehyde dehydrogenase, mitochondrial OS=Mus musculus OX=10090 GN=Aldh2 PE=1 SV=1	0	35.969	21	11	25	10	519	56.5	7.62	41.59	11	Pf00171	11669	ENSMUSG00000029455	Aldh2	mmu:11669; P47738	Fatty Acid Omega Oxidation; Tryptophan metabolism	Ethanol oxidation; Metabolism of serotonin	4	0
Low	Q5SGK3	Aldehyde oxidase 2 OS=Mus musculus OX=10090 GN=Aox2 PE=1 SV=2	0.191	0.881	2	1	1	1	1345	147.8	6.86	0	1	Pf00941, Pf01799, Pf02738, Pf03450	213043	ENSMUSG00000079554	Aox2	B9EKC6; mmu:213043; Q5SGK3			0	0
High	Q9JII6	Aldo-keto reductase family 1 member A1 OS=Mus musculus OX=10090 GN=Akr1a1 PE=1 SV=3	0	32.639	36	11	23	11	325	36.6	7.39	45.26	11		58810	ENSMUSG00000028692	Akr1a1	mmu:58810; Q9CQI5; Q9CQT8; Q9CT53; Q9D012; Q9D016; Q9D0I7; Q9D0P3; Q9JII6	Metapathway biotransformation	Glutathione conjugation; Formation of xylulose-5-phosphate	3	0
High	P45376	Aldo-keto reductase family 1 member B1 OS=Mus musculus OX=10090 GN=Akr1b1 PE=1 SV=3	0	32.641	36	11	17	11	316	35.7	7.18	37.97	11	Pf00248	11677	ENSMUSG00000001642	Akr1b1	mmu:11677; O70130; P45376; Q99KC9	Metapathway biotransformation; Polyol pathway; Eicosanoid metabolism via Cyclo Oxygenases (COX)	Pregnenolone biosynthesis; Fructose biosynthesis	5	0
Medium	P21300	Aldo-keto reductase family 1 member B7 OS=Mus musculus OX=10090 GN=Akr1b7 PE=1 SV=4	0.046	1.794	2	1	2	1	316	36	7.25	0	1		11997	ENSMUSG00000052131	Akr1b7	mmu:11997; P21300		Estrogen biosynthesis	1	0
Low	Q91WR5	Aldo-keto reductase family 1 member C21 OS=Mus musculus OX=10090 GN=Akr1c21 PE=1 SV=2	0.083	1.393	7	1	2	1	323	36.9	7.18	0	1	Pf00248	77337	ENSMUSG00000021207	Akr1c21	mmu:77337; Q6P8V0; Q91WR5; Q9CX32			0	0
High	Q8C0I1	Alkyldihydroxyacetonephosphate synthase, peroxisomal OS=Mus musculus OX=10090 GN=Agps PE=1 SV=1	0.006	3.743	5	2	3	2	645	71.6	7.5	6.84	2	Pf01565, Pf02913	228061		Agps	mmu:228061; Q8C0I1	Triacylglyceride Synthesis	Peroxisomal protein import; Plasmalogen biosynthesis	3	0
Low	Q9EQX4	Allograft inflammatory factor 1-like OS=Mus musculus OX=10090 GN=Aif1l PE=1 SV=1	0.131	1.09	5	1	1	1	150	17	7.18	2.06	1		108897	ENSMUSG00000001864	Aif1l	mmu:108897; Q8C150; Q9EQX4			0	0
Low	O88819	Alpha-(1,3)-fucosyltransferase 9 OS=Mus musculus OX=10090 GN=Fut9 PE=2 SV=1	0.119	1.157	2	1	2	1	359	42	7.71	1.97	1	Pf00852	14348	ENSMUSG00000055373	Fut9	mmu:14348; O88819; Q3TQ63		Lewis blood group biosynthesis	1	0
High	Q8VDI9	Alpha-1,2-mannosyltransferase ALG9 OS=Mus musculus OX=10090 GN=Alg9 PE=2 SV=1	0.002	5.087	6	3	4	3	611	69.5	8.94	2.23	3	Pf03901	102580	ENSMUSG00000032059	Alg9	mmu:102580; Q8BT44; Q8C378; Q8C7G0; Q8VDI9		Biosynthesis of the N-glycan precursor (dolichol lipid-linked oligosaccharide, LLO) and transfer to a nascent protein	1	0
Low	Q812G0	Alpha-1,3-mannosyl-glycoprotein 4-beta-N-acetylglucosaminyltransferase A OS=Mus musculus OX=10090 GN=Mgat4a PE=2 SV=1	0.187	0.887	4	1	1	1	535	61.4	7.62	0	1	Pf04666	269181	ENSMUSG00000026110	Mgat4a	mmu:269181; Q3TQT1; Q80UI0; Q812G0		Regulation of Insulin-like Growth Factor (IGF) transport and uptake by Insulin-like Growth Factor Binding Proteins (IGFBPs); Post-translational protein phosphorylation; N-Glycan antennae elongation	3	0
High	Q9DBE8	Alpha-1,3/1,6-mannosyltransferase ALG2 OS=Mus musculus OX=10090 GN=Alg2 PE=1 SV=2	0	13.444	17	6	9	6	415	47.4	7.97	8.75	6	Pf00534	56737	ENSMUSG00000039740	Alg2	mmu:56737; Q7TN30; Q9CWI6; Q9DBE8; Q9JJA8		Biosynthesis of the N-glycan precursor (dolichol lipid-linked oligosaccharide, LLO) and transfer to a nascent protein	1	0
Low	P07758	Alpha-1-antitrypsin 1-1 OS=Mus musculus OX=10090 GN=Serpina1a PE=1 SV=4	0.153	0.997	5	1	1	1	413	46	5.72	2.4	1	Pf00079	20700; 20703	ENSMUSG00000066366	Serpina1a	mmu:20700; P07758; Q3UJ47; Q80YB8; Q8JZV6; Q91XB8			0	0
Low	Q9DCQ7	Alpha-1-antitrypsin 1-6 OS=Mus musculus OX=10090 GN=Serpina1f PE=2 SV=1	0.116	1.182	3	1	1	1	411	46.3	8.59	2.24	1	Pf00079	68348		Serpina1f	mmu:68348; Q3LFT1; Q3TNC2; Q9DCQ7			0	0
High	Q61234	Alpha-1-syntrophin OS=Mus musculus OX=10090 GN=Snta1 PE=1 SV=1	0	11.312	9	5	7	5	503	53.6	6.86	9.89	5	Pf00595		ENSMUSG00000027488	Snta1	Q61234; Q8VEF3			0	0
Low	P97717	Alpha-1B adrenergic receptor OS=Mus musculus OX=10090 GN=Adra1b PE=1 SV=2	0.148	1.02	4	1	1	1	514	56.4	9.04	0	1				Adra1b	P97717		G alpha (q) signalling events; G alpha (12/13) signalling events; Adrenoceptors	3	0
Low	Q19LI2	Alpha-1B-glycoprotein OS=Mus musculus OX=10090 GN=A1bg PE=1 SV=1	0.201	0.852	3	1	1	1	512	56.5	6.79	0	1	Pf13895	117586	ENSMUSG00000022347	A1bg	mmu:117586; Q19LI2		Neutrophil degranulation; Platelet degranulation	2	0
High	Q7TPR4	Alpha-actinin-1 OS=Mus musculus OX=10090 GN=Actn1 PE=1 SV=1	0	141.166	39	33	105	20	892	103	5.38	230.22	33	Pf00307, Pf00435, Pf08726	109711	ENSMUSG00000015143	Actn1	mmu:109711; Q7TPR4	Regulation of Actin Cytoskeleton; Integrin-mediated Cell Adhesion; Focal Adhesion	RHOF GTPase cycle; RHOD GTPase cycle; Platelet degranulation ; RHOBTB2 GTPase cycle; Regulation of cytoskeletal remodeling and cell spreading by IPP complex components	8	3
High	Q9JI91	Alpha-actinin-2 OS=Mus musculus OX=10090 GN=Actn2 PE=1 SV=2	0	94.395	32	24	55	17	894	103.8	5.45	117.47	24	Pf00307, Pf00435, Pf08726	11472	ENSMUSG00000052374	Actn2	G3UW84; mmu:11472; Q9JI91		Platelet degranulation ; RAF/MAP kinase cascade; Striated Muscle Contraction; Unblocking of NMDA receptors, glutamate binding and activation	4	0
High	P57780	Alpha-actinin-4 OS=Mus musculus OX=10090 GN=Actn4 PE=1 SV=1	0	224.072	50	46	166	35	912	104.9	5.41	391.3	46	Pf00307, Pf00435, Pf08726	60595	ENSMUSG00000054808	Actn4	mmu:60595; P57780	Primary Focal Segmental Glomerulosclerosis FSGS	Platelet degranulation	2	10
High	Q9QYC0	Alpha-adducin OS=Mus musculus OX=10090 GN=Add1 PE=1 SV=2	0	130.992	43	27	87	26	735	80.6	5.9	197.7	27		11518	ENSMUSG00000029106	Add1	mmu:11518; Q9JLE3; Q9QYC0		Miscellaneous transport and binding events; Caspase-mediated cleavage of cytoskeletal proteins	2	0
High	Q9DBF1	Alpha-aminoadipic semialdehyde dehydrogenase OS=Mus musculus OX=10090 GN=Aldh7a1 PE=1 SV=4	0	27.279	21	8	8	8	539	58.8	7.47	21.75	8		110695	ENSMUSG00000053644	Aldh7a1	mmu:110695; Q3TFC7; Q3TVH7; Q3UKT6; Q9DBF1		Lysine catabolism; Choline catabolism	2	0
High	P61164	Alpha-centractin OS=Mus musculus OX=10090 GN=Actr1a PE=1 SV=1	0	40.453	38	12	31	6	376	42.6	6.64	67.29	12	Pf00022	54130	ENSMUSG00000025228	Actr1a	mmu:54130; P42024; P61164; Q3TJF9		Anchoring of the basal body to the plasma membrane; Regulation of PLK1 Activity at G2/M Transition; Loss of Nlp from mitotic centrosomes; Recruitment of mitotic centrosome proteins and complexes; Recruitment of NuMA to mitotic centrosomes; AURKA Activation by TPX2; MHC class II antigen presentation; COPI-mediated anterograde transport; HSP90 chaperone cycle for steroid hormone receptors (SHR); CO…	11	5
Medium	P23927	Alpha-crystallin B chain OS=Mus musculus OX=10090 GN=Cryab PE=1 SV=2	0.022	2.245	6	1	1	1	175	20.1	7.33	0	1	Pf00011, Pf00525	12955	ENSMUSG00000032060	Cryab	mmu:12955; P23927; Q64325		HSF1-dependent transactivation	1	0
High	P60840	Alpha-endosulfine OS=Mus musculus OX=10090 GN=Ensa PE=1 SV=1	0	26.078	62	6	13	6	121	13.3	7.24	30.04	6	Pf04667	56205	ENSMUSG00000038619	Ensa	mmu:56205; P60840; Q5D069; Q6PBG4; Q9CQZ9; Q9Z0G1		MASTL Facilitates Mitotic Progression	1	0
High	P17182	Alpha-enolase OS=Mus musculus OX=10090 GN=Eno1 PE=1 SV=3	0	109.196	62	28	61	25	434	47.1	6.8	131.22	28	Pf00113, Pf03952	13806; 433182	ENSMUSG00000059040; ENSMUSG00000063524	Eno1	mmu:13806; mmu:433182; P17182; Q99KT7; Q9DCY7	Glycolysis and Gluconeogenesis	Gluconeogenesis; Glycolysis	3	3
High	Q9ERA0	Alpha-globin transcription factor CP2 OS=Mus musculus OX=10090 GN=Tfcp2 PE=1 SV=1	0	9.324	6	2	4	1	502	57	5.54	7.42	2	Pf04516, Pf18016	21422	ENSMUSG00000009733	Tfcp2	mmu:21422; Q3UGJ4; Q8VC13; Q9ERA0			0	0
High	P46660	Alpha-internexin OS=Mus musculus OX=10090 GN=Ina PE=1 SV=3	0	177.886	73	47	193	41	501	55.3	5.4	411.15	47	Pf00038, Pf04732	226180	ENSMUSG00000034336	Ina	mmu:226180; P46660; Q61958; Q8VCW5			0	1
Low	Q9D8F1	Alpha-ketoglutarate-dependent dioxygenase alkB homolog 4 OS=Mus musculus OX=10090 GN=Alkbh4 PE=1 SV=1	0.25	0.738	5	1	1	1	300	33.4	7.01	0	1		72041	ENSMUSG00000039754	Alkbh4	mmu:72041; Q8R1Y9; Q9D8F1			0	0
Medium	Q8K2U2	Alpha-ketoglutarate-dependent dioxygenase alkB homolog 6 OS=Mus musculus OX=10090 GN=Alkbh6 PE=2 SV=3	0.035	1.974	3	1	1	1	238	26.8	8.16	2.24	1		233065	ENSMUSG00000042831	Alkbh6	G3X994; mmu:233065; Q8K2U2			0	0
High	Q91W89	Alpha-mannosidase 2C1 OS=Mus musculus OX=10090 GN=Man2c1 PE=1 SV=1	0	14.521	6	6	10	6	1039	115.6	6.51	16.18	6	Pf01074, Pf07748, Pf09261, Pf17677	73744	ENSMUSG00000032295	Man2c1	mmu:73744; Q3ZCX9; Q91W89		Lysosomal oligosaccharide catabolism	1	0
Medium	Q9QYJ1	Alpha-N-acetylgalactosaminide alpha-2,6-sialyltransferase 5 OS=Mus musculus OX=10090 GN=St6galnac5 PE=2 SV=1	0.049	1.774	3	1	3	1	336	38.4	9.45	4.02	1	Pf00777	26938		St6galnac5	mmu:26938; Q9QYJ1; Q9R0K6		Sialic acid metabolism	1	0
Low	Q9CXB8	Alpha-protein kinase 1 OS=Mus musculus OX=10090 GN=Alpk1 PE=2 SV=2	0.204	0.843	1	1	1	1	1231	136	6.38	2.01	1				Alpk1	Q69ZH5; Q8BLT9; Q9CXB8		Alpha-protein kinase 1 signaling pathway	1	0
High	Q9DB05	Alpha-soluble NSF attachment protein OS=Mus musculus OX=10090 GN=Napa PE=1 SV=1	0	33.503	39	9	21	7	295	33.2	5.45	56.16	9		108124	ENSMUSG00000006024	Napa	mmu:108124; Q543I3; Q9DB05		COPI-dependent Golgi-to-ER retrograde traffic; COPI-mediated anterograde transport; Retrograde transport at the Trans-Golgi-Network; Intra-Golgi traffic; Golgi Associated Vesicle Biogenesis; COPII-mediated vesicle transport	6	0
High	O55042	Alpha-synuclein OS=Mus musculus OX=10090 GN=Snca PE=1 SV=2	0	85.123	89	16	82	13	140	14.5	4.77	122.24	16		20617	ENSMUSG00000025889	Snca	mmu:20617; O55042; Q3U130; Q9CXF8; Q9EQC3; Q9QUR3	Alzheimers Disease; Parkinsons Disease Pathway; EGFR1 Signaling Pathway		3	3
Low	Q6PAM1	Alpha-taxilin OS=Mus musculus OX=10090 GN=Txlna PE=1 SV=1	0.055	1.672	3	1	1	1	554	62.3	6.74	2.75	1	Pf09728	109658	ENSMUSG00000053841	Txlna	mmu:109658; Q6P1E5; Q6PAM1	TNF-alpha NF-kB Signaling Pathway	Other interleukin signaling	2	0
High	Q8K341	Alpha-tubulin N-acetyltransferase 1 OS=Mus musculus OX=10090 GN=Atat1 PE=1 SV=1	0	20.525	25	9	13	9	421	47.1	9.98	17.71	9		73242	ENSMUSG00000024426	Atat1	B8JJ75; B8JJ77; mmu:73242; Q3UZR9; Q8BM67; Q8C1D1; Q8K2M7; Q8K341		Cilium Assembly	1	0
Low	Q7M759	Alpha/beta hydrolase domain-containing protein 17B OS=Mus musculus OX=10090 GN=Abhd17b PE=1 SV=1	0.153	0.998	3	1	1	1	288	32.2	6.29	2.04	1		226016	ENSMUSG00000047368	Abhd17b	mmu:226016; Q58EV9; Q7M759; Q8K275		RAS processing	1	0
Low	Q60I26	ALS2 C-terminal-like protein OS=Mus musculus OX=10090 GN=Als2cl PE=1 SV=1	0.187	0.887	1	1	1	1	952	108.1	6.87	0	1	Pf02493	235633		Als2cl	mmu:235633; Q60I26; Q6KAQ8; Q8C0K7; Q8K468; Q8R222		RAB GEFs exchange GTP for GDP on RABs	1	0
High	Q920R0	Alsin OS=Mus musculus OX=10090 GN=Als2 PE=1 SV=3	0	36.8	10	14	19	13	1651	182.5	6.3	43.8	14	Pf02493	74018	ENSMUSG00000026024	Als2	G5E868; mmu:74018; Q8JZR1; Q920R0; Q9CXJ3		RAC1 GTPase cycle; RAB GEFs exchange GTP for GDP on RABs	2	0
High	Q9JJW6	Aly/REF export factor 2 OS=Mus musculus OX=10090 GN=Alyref2 PE=1 SV=1	0	7.97	14	2	3	1	218	23.7	10.04	10.49	2	Pf13865	56009		Alyref2	mmu:56009; Q8C869; Q9JJW6	mRNA processing		1	0
Medium	Q9WU38	Amiloride-sensitive sodium channel subunit beta OS=Mus musculus OX=10090 GN=Scnn1b PE=1 SV=1	0.038	1.938	6	2	2	2	638	72.1	6.09	2.03	2		20277	ENSMUSG00000030873	Scnn1b	mmu:20277; Q9WU38		Stimuli-sensing channels	1	0
High	Q64133	Amine oxidase [flavin-containing] A OS=Mus musculus OX=10090 GN=Maoa PE=1 SV=3	0	16.904	11	6	9	5	526	59.6	7.81	20.64	6	Pf01593	17161	ENSMUSG00000025037	Maoa	B1AX52; mmu:17161; Q64133; Q8K0Z8	SIDS Susceptibility Pathways; Oxidative Stress; Biogenic Amine Synthesis	Norepinephrine Neurotransmitter Release Cycle; Enzymatic degradation of dopamine by COMT; Enzymatic degradation of Dopamine by monoamine oxidase; Metabolism of serotonin; Biogenic amines are oxidatively deaminated to aldehydes by MAOA and MAOB	8	0
High	Q8BW75	Amine oxidase [flavin-containing] B OS=Mus musculus OX=10090 GN=Maob PE=1 SV=4	0	21.173	16	7	9	6	520	58.5	8.29	17.52	7	Pf01593	109731	ENSMUSG00000040147	Maob	mmu:109731; Q14CG9; Q8BW75; Q8C0B2	Tryptophan metabolism	Biogenic amines are oxidatively deaminated to aldehydes by MAOA and MAOB	2	1
High	P31230	Aminoacyl tRNA synthase complex-interacting multifunctional protein 1 OS=Mus musculus OX=10090 GN=Aimp1 PE=1 SV=2	0	11.101	14	4	7	4	310	34	8.35	13.8	4	Pf01588		ENSMUSG00000028029	Aimp1	P31230; Q60659			0	0
High	Q8R010	Aminoacyl tRNA synthase complex-interacting multifunctional protein 2 OS=Mus musculus OX=10090 GN=Aimp2 PE=1 SV=2	0	9.745	15	3	5	3	320	35.4	7.83	7.92	3		231872	ENSMUSG00000029610	Aimp2	E9QP67; mmu:231872; Q8R010; Q8R2Y6	Keap1-Nrf2		1	0
High	Q8VCT3	Aminopeptidase B OS=Mus musculus OX=10090 GN=Rnpep PE=1 SV=2	0	21.385	13	8	13	8	650	72.4	5.35	32.86	8	Pf01433	215615	ENSMUSG00000041926	Rnpep	mmu:215615; Q3TX27; Q8VCT3	mRNA processing		1	0
Low	P97449	Aminopeptidase N OS=Mus musculus OX=10090 GN=Anpep PE=1 SV=4	0.143	1.039	2	1	1	1	966	109.6	5.9	0	1	Pf01433, Pf11838	16790	ENSMUSG00000039062	Anpep	mmu:16790; P97449; Q91YH8; Q99K63	Glutathione metabolism; Oxidative Stress and Redox Pathway; Glutathione and one carbon metabolism	Neutrophil degranulation	4	0
High	Q3V1D3	AMP deaminase 1 OS=Mus musculus OX=10090 GN=Ampd1 PE=1 SV=2	0.009	3.195	3	2	2	1	745	86.1	6.92	2.43	2	Pf19326	229665	ENSMUSG00000070385	Ampd1	F8VPY9; mmu:229665; Q3V1D3	Purine metabolism	Purine salvage	2	0
High	Q9DBT5	AMP deaminase 2 OS=Mus musculus OX=10090 GN=Ampd2 PE=1 SV=1	0	27.454	15	12	24	12	798	92	6.23	44.53	12	Pf19326	109674	ENSMUSG00000027889	Ampd2	A2AE28; mmu:109674; Q91YI2; Q9DBT5	Purine metabolism	Purine salvage	2	0
High	O08739	AMP deaminase 3 OS=Mus musculus OX=10090 GN=Ampd3 PE=1 SV=2	0	7.021	4	3	6	2	766	88.6	7.33	11	3	Pf19326	11717	ENSMUSG00000005686	Ampd3	mmu:11717; O08739; O88692; Q8CFR4	Purine metabolism	Neutrophil degranulation; Purine salvage	3	1
High	Q7TQF7	Amphiphysin OS=Mus musculus OX=10090 GN=Amph PE=1 SV=1	0	83.175	33	24	45	22	686	75	4.63	93.83	24	Pf03114, Pf14604	218038	ENSMUSG00000021314	Amph	mmu:218038; Q7TQF7; Q8R1C4		Clathrin-mediated endocytosis	1	0
Medium	Q80ZD9	Amphoterin-induced protein 2 OS=Mus musculus OX=10090 GN=Amigo2 PE=1 SV=1	0.047	1.783	5	1	1	1	519	57.5	8.47	3.02	1	Pf00047, Pf13855	105827	ENSMUSG00000048218	Amigo2	mmu:105827; Q80ZD9		RAC1 GTPase cycle; RAC3 GTPase cycle	2	0
Low	Q76N33	AMSH-like protease OS=Mus musculus OX=10090 GN=Stambpl1 PE=1 SV=1	0.203	0.846	3	1	1	1	436	49.6	7.53	0	1	Pf01398, Pf08969	76630	ENSMUSG00000024776	Stambpl1	mmu:76630; Q76LY0; Q76N33; Q8VEK5		Metalloprotease DUBs	1	0
High	Q8R5A3	Amyloid beta A4 precursor protein-binding family B member 1-interacting protein OS=Mus musculus OX=10090 GN=Apbb1ip PE=1 SV=2	0.009	3.111	3	2	3	2	670	74.3	5.35	3.87	2	Pf00788	54519	ENSMUSG00000026786	Apbb1ip	mmu:54519; O35329; Q8BRU0; Q8R5A3; Q99KV8	TYROBP Causal Network	MAP2K and MAPK activation; GRB2:SOS provides linkage to MAPK signaling for Integrins ; p130Cas linkage to MAPK signaling for integrins	5	0
High	B2RUJ5	Amyloid-beta A4 precursor protein-binding family A member 1 OS=Mus musculus OX=10090 GN=Apba1 PE=1 SV=2	0	74.503	35	22	56	21	842	92.9	4.88	91.68	22	Pf00595	319924	ENSMUSG00000024897	Apba1	B2RUJ5; mmu:319924; Q3UH49; Q8BMF2		Dopamine Neurotransmitter Release Cycle	1	1
High	P98084	Amyloid-beta A4 precursor protein-binding family A member 2 OS=Mus musculus OX=10090 GN=Apba2 PE=1 SV=2	0	23.842	9	5	13	4	750	82.7	4.88	12.33	5		11784	ENSMUSG00000030519	Apba2	mmu:11784; P98084; Q6PAJ2			0	0
High	Q9QXJ1	Amyloid-beta A4 precursor protein-binding family B member 1 OS=Mus musculus OX=10090 GN=Apbb1 PE=1 SV=3	0	24.544	16	10	16	10	710	77.3	5	22.08	10		11785	ENSMUSG00000037032	Apbb1	E9QNW5; mmu:11785; O08642; Q3TPU0; Q8BNF4; Q8BSR9; Q9QXJ1	Alzheimers Disease	Recruitment and ATM-mediated phosphorylation of repair and signaling proteins at DNA double strand breaks	2	0
High	P12023	Amyloid-beta A4 protein OS=Mus musculus OX=10090 GN=App PE=1 SV=3	0	9.605	6	4	7	4	770	86.7	4.79	11.07	4	Pf00014	11820	ENSMUSG00000022892	App	mmu:11820; P12023; P97487; P97942; Q99K32	Alzheimers Disease; Delta-Notch Signaling Pathway	G alpha (q) signalling events; Insertion of tail-anchored proteins into the endoplasmic reticulum membrane; TAK1 activates NFkB by phosphorylation and activation of IKKs complex; Platelet degranulation ; ECM proteoglycans; Regulation of Insulin-like Growth Factor (IGF) transport and uptake by Insulin-like Growth Factor Binding Proteins (IGFBPs); Post-translational protein phosphorylation; G alpha…	14	0
Low	Q03157	Amyloid-like protein 1 OS=Mus musculus OX=10090 GN=Aplp1 PE=1 SV=1	0.092	1.326	2	1	1	1	653	72.7	5.67	0	1		11803		Aplp1	mmu:11803; Q03157; Q8VC38			0	0
Low	Q91X58	AN1-type zinc finger protein 2B OS=Mus musculus OX=10090 GN=Zfand2b PE=1 SV=1	0.127	1.117	3	1	2	1	257	27.9	6.93	1.84	1		68818	ENSMUSG00000026197	Zfand2b	mmu:68818; Q91X58; Q9D0W4			0	0
Medium	O88878	AN1-type zinc finger protein 5 OS=Mus musculus OX=10090 GN=Zfand5 PE=1 SV=1	0.018	2.313	8	1	1	1	213	23	8.51	2.24	1	Pf01754	22682	ENSMUSG00000024750	Zfand5	mmu:22682; O88878; Q3B7K8	TNF-alpha NF-kB Signaling Pathway		1	0
High	Q8WTY4	Anamorsin OS=Mus musculus OX=10090 GN=Ciapin1 PE=1 SV=1	0	31.459	47	10	18	10	309	33.4	5.2	28.46	10	Pf05093, Pf08241	109006	ENSMUSG00000031781	Ciapin1	mmu:109006; Q3UJW5; Q8VC24; Q8WTY4; Q91W83			0	0
Medium	P53995	Anaphase-promoting complex subunit 1 OS=Mus musculus OX=10090 GN=Anapc1 PE=1 SV=2	0.025	2.177	1	1	1	1	1944	215.9	6.35	0	1	Pf01851, Pf18122, Pf19521	17222	ENSMUSG00000014355	Anapc1	A2ATQ4; mmu:17222; P53995; Q8BP33; Q8C772		Separation of Sister Chromatids; Antigen processing: Ubiquitination & Proteasome degradation; APC/C:Cdc20 mediated degradation of Cyclin B; Cdc20:Phospho-APC/C mediated degradation of Cyclin A; Regulation of APC/C activators between G1/S and early anaphase; Phosphorylation of the APC/C; Inactivation of APC/C via direct inhibition of the APC/C complex; Autodegradation of Cdh1 by Cdh1:APC/C; APC/C:…	15	0
High	Q8BTZ4	Anaphase-promoting complex subunit 5 OS=Mus musculus OX=10090 GN=Anapc5 PE=1 SV=1	0	6.507	5	4	5	4	740	83	6.71	4.35	4		59008	ENSMUSG00000029472	Anapc5	mmu:59008; Q3TGA7; Q80UJ6; Q80W43; Q8BTZ4; Q8BWW7; Q8C0F7; Q9CRX0; Q9CSL1; Q9JJB8		Antigen processing: Ubiquitination & Proteasome degradation; Autodegradation of Cdh1 by Cdh1:APC/C; APC/C:Cdc20 mediated degradation of Securin; APC/C:Cdh1 mediated degradation of Cdc20 and other APC/C:Cdh1 targeted proteins in late mitosis/early G1; Cdc20:Phospho-APC/C mediated degradation of Cyclin A; Separation of Sister Chromatids; CDK-mediated phosphorylation and removal of Cdc6; Inactivatio…	15	0
Low	P19091	Androgen receptor OS=Mus musculus OX=10090 GN=Ar PE=1 SV=1	0.103	1.252	1	1	3	1	899	98.1	6.79	1.77	1	Pf00104, Pf00105	11835	ENSMUSG00000046532	Ar	mmu:11835; P19091	SIDS Susceptibility Pathways; IL-6 signaling Pathway; Alpha6-Beta4 Integrin Signaling Pathway; Nuclear Receptors	Ub-specific processing proteases; HSP90 chaperone cycle for steroid hormone receptors (SHR); Nuclear Receptor transcription pathway; SUMOylation of intracellular receptors; Activated PKN1 stimulates transcription of AR (androgen receptor) regulated genes KLK2 and KLK3; RUNX2 regulates osteoblast differentiation	10	0
Low	Q7TN31	Angiogenic factor with G patch and FHA domains 1 OS=Mus musculus OX=10090 GN=Aggf1 PE=2 SV=1	0.237	0.767	4	1	1	1	711	79.4	5.22	0	1	Pf00498, Pf01585	66549	ENSMUSG00000021681	Aggf1	mmu:66549; Q7TN31; Q8R2S6; Q9CQR9; Q9CU87; Q9D768			0	0
Low	O08538	Angiopoietin-1 OS=Mus musculus OX=10090 GN=Angpt1 PE=1 SV=2	0.133	1.079	2	1	1	1	498	57.5	6.76	0	1	Pf00147	11600	ENSMUSG00000022309	Angpt1	mmu:11600; O08538; Q6NWV7	Focal Adhesion-PI3K-Akt-mTOR-signaling pathway	RAF/MAP kinase cascade; Tie2 Signaling	3	0
Medium	Q9Z1P8	Angiopoietin-related protein 4 OS=Mus musculus OX=10090 GN=Angptl4 PE=1 SV=1	0.034	1.991	3	1	1	1	410	45.5	8.13	2.29	1	Pf00147	57875	ENSMUSG00000002289	Angptl4	mmu:57875; Q78ZJ9; Q9JHX7; Q9JLX7; Q9Z1P8	PPAR signaling pathway	Assembly of active LPL and LIPC lipase complexes	2	0
High	P16283	Anion exchange protein 3 OS=Mus musculus OX=10090 GN=Slc4a3 PE=1 SV=2	0	11.299	4	4	8	4	1227	135.3	6.51	19.58	4	Pf00955	20536	ENSMUSG00000006576	Slc4a3	mmu:20536; P16283; Q9ERP5		Bicarbonate transporters	1	0
Low	P07146	Anionic trypsin-2 OS=Mus musculus OX=10090 GN=Prss2 PE=1 SV=1	0.23	0.783	8	1	1	1	246	26.2	4.63	2.68	1	Pf00089	22072	ENSMUSG00000057163	Prss2	mmu:22072; P07146		Neutrophil degranulation; Antimicrobial peptides; Cobalamin (Cbl, vitamin B12) transport and metabolism; Alpha-defensins; Activation of Matrix Metalloproteinases	5	0
Low	Q6GQW0	Ankyrin repeat and BTB/POZ domain-containing protein BTBD11 OS=Mus musculus OX=10090 GN=Btbd11 PE=2 SV=2	0.203	0.845	3	1	1	1	1109	121.5	6.81	0	1	Pf00023, Pf00651	74007	ENSMUSG00000020042	Btbd11	mmu:74007; Q6GQW0; Q6PCZ7; Q8CAD2; Q8CDA2; Q9D3B9			0	0
Low	Q14DN9	Ankyrin repeat and death domain-containing protein 1B OS=Mus musculus OX=10090 GN=Ankdd1b PE=2 SV=3	0.251	0.735	1	1	1	1	521	58.4	8.06	1.96	1	Pf12796	271144	ENSMUSG00000047117	Ankdd1b	mmu:271144; Q14DN9; Q8BZP7			0	0
High	Q6ZPS6	Ankyrin repeat and IBR domain-containing protein 1 OS=Mus musculus OX=10090 GN=Ankib1 PE=1 SV=2	0	11.576	6	5	7	5	1085	121.8	5.16	9.97	5	Pf00023, Pf01485	70797	ENSMUSG00000040351	Ankib1	mmu:70797; Q6AXE1; Q6ZPS6			0	0
High	Q6P1H6	Ankyrin repeat and LEM domain-containing protein 2 OS=Mus musculus OX=10090 GN=Ankle2 PE=1 SV=2	0	7.429	4	4	4	4	964	106.1	7.37	9.52	4		71782	ENSMUSG00000029501	Ankle2	mmu:71782; Q3UQF6; Q3UY52; Q3V1X7; Q6P1H6; Q6ZQ67; Q8BRM7; Q9CTK6		RHOG GTPase cycle; RAC2 GTPase cycle; Initiation of Nuclear Envelope (NE) Reformation	3	0
High	Q3TPE9	Ankyrin repeat and MYND domain-containing protein 2 OS=Mus musculus OX=10090 GN=Ankmy2 PE=1 SV=1	0.002	5.181	10	4	5	4	440	48.7	6.67	4.03	4	Pf01753, Pf12796	217473	ENSMUSG00000036188	Ankmy2	mmu:217473; Q3TPE9; Q8BK14; Q8BYW5; Q8R3N4; Q921J1			0	0
High	P59672	Ankyrin repeat and SAM domain-containing protein 1A OS=Mus musculus OX=10090 GN=Anks1a PE=1 SV=3	0	15.272	4	4	11	3	1150	125.2	6.05	20.88	4	Pf00536, Pf07647, Pf12796	224650	ENSMUSG00000024219	Anks1a	mmu:224650; P59672; Q6ZQG0			0	0
Medium	Q8VHS6	Ankyrin repeat and SOCS box protein 15 OS=Mus musculus OX=10090 GN=Asb15 PE=2 SV=2	0.039	1.91	8	2	2	1	583	65.5	6.05	0	2	Pf07525, Pf12796	78910	ENSMUSG00000029685	Asb15	mmu:78910; Q8CDP8; Q8VHS6			0	0
Low	Q8VHS5	Ankyrin repeat and SOCS box protein 16 OS=Mus musculus OX=10090 GN=Asb16 PE=2 SV=1	0.124	1.128	5	1	1	1	453	49.1	6.52	0	1	Pf07525, Pf13857	217217	ENSMUSG00000034768	Asb16	mmu:217217; Q8BYT0; Q8VHS5		Neddylation; Antigen processing: Ubiquitination & Proteasome degradation	2	0
Low	Q9WV71	Ankyrin repeat and SOCS box protein 4 OS=Mus musculus OX=10090 GN=Asb4 PE=1 SV=1	0.089	1.345	2	1	1	1	426	48.1	7.52	0	1	Pf07525, Pf12796	65255	ENSMUSG00000042607	Asb4	mmu:65255; Q3UZE1; Q3V070; Q9WV71		Neddylation; Antigen processing: Ubiquitination & Proteasome degradation	2	0
High	Q8BIZ1	Ankyrin repeat and sterile alpha motif domain-containing protein 1B OS=Mus musculus OX=10090 GN=Anks1b PE=1 SV=3	0	63.928	13	18	32	17	1259	139	6.29	66.78	18	Pf00536, Pf12796	77531		Anks1b	E9Q644; mmu:77531; Q4KMR9; Q8BIZ1; Q8BJ47; Q8BJ49			0	1
Low	E9Q4F7	Ankyrin repeat domain-containing protein 11 OS=Mus musculus OX=10090 GN=Ankrd11 PE=1 SV=1	0.152	1	0	1	1	1	2643	296	6.98	1.74	1	Pf00023, Pf12796	77087	ENSMUSG00000035569	Ankrd11	B2RY01; E9Q4F7; mmu:77087; Q6PB57			0	0
Medium	Q6PD24	Ankyrin repeat domain-containing protein 13D OS=Mus musculus OX=10090 GN=Ankrd13d PE=1 SV=2	0.016	2.492	2	1	1	1	605	68	5.47	2.32	1	Pf12796	68423	ENSMUSG00000005986	Ankrd13d	G3X9A8; mmu:68423; Q6PD24			0	0
High	Q99NH0	Ankyrin repeat domain-containing protein 17 OS=Mus musculus OX=10090 GN=Ankrd17 PE=1 SV=2	0	9.804	2	4	5	4	2603	274	6.52	9.92	4	Pf12796	81702	ENSMUSG00000055204	Ankrd17	mmu:81702; Q3TV99; Q5F4T7; Q6PG69; Q6ZQ66; Q8CHT4; Q99NH0			0	0
Low	Q80VM7	Ankyrin repeat domain-containing protein 24 OS=Mus musculus OX=10090 GN=Ankrd24 PE=2 SV=4	0.166	0.954	1	1	2	1	985	106.2	4.89	0	1	Pf12796	70615	ENSMUSG00000054708	Ankrd24	E9QJV7; mmu:70615; Q80VM7			0	0
High	Q3UMR0	Ankyrin repeat domain-containing protein 27 OS=Mus musculus OX=10090 GN=Ankrd27 PE=1 SV=2	0	18.278	7	6	11	6	1048	116.7	6.65	25.42	6	Pf12796	245886	ENSMUSG00000034867	Ankrd27	mmu:245886; Q3UMR0; Q6KAU0; Q6P1F9; Q7TNY8; Q8BUD2; Q91W65		RAB GEFs exchange GTP for GDP on RABs	1	0
High	Q3UUF8	Ankyrin repeat domain-containing protein 34B OS=Mus musculus OX=10090 GN=Ankrd34b PE=1 SV=1	0	8.004	6	3	3	3	508	55.4	8.02	2.62	3		218440	ENSMUSG00000045034	Ankrd34b	mmu:218440; Q3UUF8; Q4VA01; Q8BVH7			0	0
High	Q5SUE8	Ankyrin repeat domain-containing protein 40 OS=Mus musculus OX=10090 GN=Ankrd40 PE=1 SV=1	0.006	3.792	7	2	4	2	363	40.5	5.1	9.17	2		71452	ENSMUSG00000020864	Ankrd40	mmu:71452; Q5SUE8; Q5SUF0; Q8R595; Q9CU71			0	0
High	Q8BTZ5	Ankyrin repeat domain-containing protein 46 OS=Mus musculus OX=10090 GN=Ankrd46 PE=1 SV=1	0.009	3.103	5	1	2	1	228	25.2	5.73	5.14	1	Pf12796	68839	ENSMUSG00000048307	Ankrd46	mmu:68839; Q1LZK9; Q8BTZ5; Q8BV97			0	0
High	A2ARS0	Ankyrin repeat domain-containing protein 63 OS=Mus musculus OX=10090 GN=Ankrd63 PE=1 SV=1	0	8.925	11	4	12	4	390	41	10.83	12.6	4		383787	ENSMUSG00000078137	Ankrd63	A2ARS0; mmu:383787			0	0
Low	Q8BLS7	Ankyrin repeat domain-containing protein SOWAHA OS=Mus musculus OX=10090 GN=Sowaha PE=1 SV=2	0.08	1.427	3	1	1	1	548	57.7	9.82	2.41	1	Pf12796	237761	ENSMUSG00000044352	Sowaha	mmu:237761; Q149C7; Q8BLS7			0	0
Medium	Q8C0J6	Ankyrin repeat domain-containing protein SOWAHC OS=Mus musculus OX=10090 GN=Sowahc PE=1 SV=2	0.03	2.06	2	1	2	1	512	54.9	6	1.73	1	Pf12796	268301	ENSMUSG00000098188	Sowahc	mmu:268301; Q8BWN1; Q8C0J6		RHOA GTPase cycle; RHOB GTPase cycle; RHOF GTPase cycle	3	0
Low	Q99PE2	Ankyrin repeat family A protein 2 OS=Mus musculus OX=10090 GN=Ankra2 PE=1 SV=1	0.213	0.82	7	1	1	1	312	34	5.17	0	1		68558	ENSMUSG00000021661	Ankra2	mmu:68558; Q99PE2			0	0
High	Q02357	Ankyrin-1 OS=Mus musculus OX=10090 GN=Ank1 PE=1 SV=2	0	15.138	4	6	11	5	1862	204.1	6.55	21.87	6	Pf00023, Pf00531, Pf00791, Pf12796	11733	ENSMUSG00000031543	Ank1	mmu:11733; P70440; P97446; P97941; Q02357; Q3TZ35; Q3UH42; Q3UHP2; Q3UYY7; Q61302; Q61303; Q78E45		COPI-mediated anterograde transport; Interaction between L1 and Ankyrins; Neurofascin interactions	3	0
High	Q8C8R3	Ankyrin-2 OS=Mus musculus OX=10090 GN=Ank2 PE=1 SV=2	0	1058.07	61	210	764	201	3898	426	5.17	1726	210	Pf00531, Pf00791, Pf12796, Pf13637	109676	ENSMUSG00000032826	Ank2	mmu:109676; Q3TM62; Q3V2X0; Q6PCN2; Q80ZZ7; Q8BNC1; Q8C445; Q8C8R3; Q8CCV0			0	10
High	G5E8K5	Ankyrin-3 OS=Mus musculus OX=10090 GN=Ank3 PE=1 SV=1	0	165.69	24	45	98	38	1961	213.9	6.7	201.03	45	Pf00531, Pf00791, Pf12796	11735	ENSMUSG00000069601	Ank3	G5E8K4; G5E8K5; mmu:11735; O08866; O08867; Q3TSJ8; Q4U205; Q4U206; Q4U256; Q4U260; Q61305; Q61306; Q61307; Q61308; Q61309; Q61310; Q8CBN3; Q8VC68	Splicing factor NOVA regulated synaptic proteins		1	0
Low	P10107	Annexin A1 OS=Mus musculus OX=10090 GN=Anxa1 PE=1 SV=2	0.152	1	3	1	1	1	346	38.7	7.37	2.02	1	Pf00191	16952	ENSMUSG00000024659	Anxa1	mmu:16952; P10107	Spinal Cord Injury; Prostaglandin Synthesis and Regulation	G alpha (q) signalling events; G alpha (i) signalling events; Formyl peptide receptors bind formyl peptides and many other ligands	5	0
High	P97384	Annexin A11 OS=Mus musculus OX=10090 GN=Anxa11 PE=1 SV=2	0	40.133	26	12	25	11	503	54	7.66	46.47	12	Pf00191	11744	ENSMUSG00000021866	Anxa11	mmu:11744; P97384; Q921F1			0	1
High	P07356	Annexin A2 OS=Mus musculus OX=10090 GN=Anxa2 PE=1 SV=2	0	20.282	23	7	11	7	339	38.7	7.69	25.15	7	Pf00191	12306	ENSMUSG00000032231	Anxa2	mmu:12306; P07356	Prostaglandin Synthesis and Regulation	Neutrophil degranulation; Dissolution of Fibrin Clot	3	0
High	O35639	Annexin A3 OS=Mus musculus OX=10090 GN=Anxa3 PE=1 SV=4	0.003	4.386	7	2	5	1	323	36.4	5.76	5.6	2	Pf00191	11745	ENSMUSG00000029484	Anxa3	mmu:11745; O35639; Q3UBI0	Prostaglandin Synthesis and Regulation		1	0
High	P48036	Annexin A5 OS=Mus musculus OX=10090 GN=Anxa5 PE=1 SV=1	0	16.966	19	6	12	5	319	35.7	4.96	24.89	6	Pf00191	11747	ENSMUSG00000027712	Anxa5	mmu:11747; P48036; Q3U5Q1; Q3U5X4; Q3U8K1; Q3UGV0; Q99LA1	Prostaglandin Synthesis and Regulation	Platelet degranulation	2	0
High	P14824	Annexin A6 OS=Mus musculus OX=10090 GN=Anxa6 PE=1 SV=3	0	84.602	37	22	48	21	673	75.8	5.5	108.99	22	Pf00191	11749	ENSMUSG00000018340	Anxa6	mmu:11749; P14824; Q8BSS4	Prostaglandin Synthesis and Regulation; Calcium Regulation in the Cardiac Cell		2	1
High	Q07076	Annexin A7 OS=Mus musculus OX=10090 GN=Anxa7 PE=1 SV=2	0	87.394	37	19	82	19	463	49.9	6.18	164.79	19	Pf00191	11750	ENSMUSG00000021814	Anxa7	mmu:11750; Q07076; Q3TT33			0	0
Low	Q9JHQ0	Annexin A9 OS=Mus musculus OX=10090 GN=Anxa9 PE=2 SV=2	0.112	1.199	7	1	1	1	345	38.1	5.49	0	1	Pf00191	71790	ENSMUSG00000015702	Anxa9	mmu:71790; Q9CQS1; Q9JHQ0			0	0
High	Q8BH79	Anoctamin-10 OS=Mus musculus OX=10090 GN=Ano10 PE=1 SV=1	0.003	4.717	3	2	2	2	659	76.1	6.7	2.27	2	Pf04547	102566	ENSMUSG00000037949	Ano10	mmu:102566; Q4FZD2; Q8BH79; Q8BMS8; Q8BV74; Q8BW67; Q8R0U0; Q99LP0		Stimuli-sensing channels	1	0
Low	Q8C5H1	Anoctamin-4 OS=Mus musculus OX=10090 GN=Ano4 PE=1 SV=2	0.134	1.074	1	1	1	1	955	111.5	8.28	0	1	Pf04547, Pf16178	320091	ENSMUSG00000035189	Ano4	mmu:320091; Q8C5H1; Q8CA37		Stimuli-sensing channels	1	0
High	Q6PB70	Anoctamin-8 OS=Mus musculus OX=10090 GN=Ano8 PE=1 SV=3	0.002	4.908	1	1	2	1	1060	119	5.74	2.98	1	Pf04547	382014	ENSMUSG00000034863	Ano8	mmu:382014; Q05CB5; Q69ZE4; Q6PB70		Stimuli-sensing channels; Regulation of Insulin-like Growth Factor (IGF) transport and uptake by Insulin-like Growth Factor Binding Proteins (IGFBPs); Post-translational protein phosphorylation	3	0
High	O35643	AP-1 complex subunit beta-1 OS=Mus musculus OX=10090 GN=Ap1b1 PE=1 SV=2	0	64.254	16	18	45	4	943	103.9	5.17	84.32	18	Pf02883	11764	ENSMUSG00000009090	Ap1b1	mmu:11764; O35643; Q3TXG4; Q922E2		MHC class II antigen presentation; Golgi Associated Vesicle Biogenesis; Lysosome Vesicle Biogenesis	3	0
High	P22892	AP-1 complex subunit gamma-1 OS=Mus musculus OX=10090 GN=Ap1g1 PE=1 SV=3	0	16.71	8	7	12	7	822	91.3	6.8	20.22	7	Pf02883	11765	ENSMUSG00000031731	Ap1g1	mmu:11765; P22892		MHC class II antigen presentation; Golgi Associated Vesicle Biogenesis; Lysosome Vesicle Biogenesis	3	0
High	P35585	AP-1 complex subunit mu-1 OS=Mus musculus OX=10090 GN=Ap1m1 PE=1 SV=3	0	11.53	7	3	6	3	423	48.5	7.3	10.39	3	Pf00928	11767	ENSMUSG00000003033	Ap1m1	mmu:11767; P35585		MHC class II antigen presentation; Golgi Associated Vesicle Biogenesis; Lysosome Vesicle Biogenesis; Neutrophil degranulation	4	0
High	P61967	AP-1 complex subunit sigma-1A OS=Mus musculus OX=10090 GN=Ap1s1 PE=1 SV=1	0	10.437	16	2	2	2	158	18.7	5.73	4.6	2	Pf01217	11769	ENSMUSG00000004849	Ap1s1	mmu:11769; P61967; P82267; Q00382; Q9BTN4; Q9UDW9		MHC class II antigen presentation; Lysosome Vesicle Biogenesis; Golgi Associated Vesicle Biogenesis	3	0
High	Q9DB50	AP-1 complex subunit sigma-2 OS=Mus musculus OX=10090 GN=Ap1s2 PE=1 SV=1	0.002	5.03	18	2	4	2	160	18.9	5.48	8.5	2	Pf01217	108012	ENSMUSG00000031367	Ap1s2	B1B0F4; mmu:108012; Q543R7; Q9DB50		Golgi Associated Vesicle Biogenesis; Lysosome Vesicle Biogenesis; MHC class II antigen presentation	3	0
High	P17426	AP-2 complex subunit alpha-1 OS=Mus musculus OX=10090 GN=Ap2a1 PE=1 SV=1	0	96.918	34	30	63	19	977	107.6	7.03	93.95	30	Pf02883	11771	ENSMUSG00000060279	Ap2a1	mmu:11771; P17426	EGFR1 Signaling Pathway	Cargo recognition for clathrin-mediated endocytosis; MHC class II antigen presentation; Recycling pathway of L1; LDL clearance; Trafficking of GluR2-containing AMPA receptors; Retrograde neurotrophin signalling; WNT5A-dependent internalization of FZD4; WNT5A-dependent internalization of FZD2, FZD5 and ROR2; VLDLR internalisation and degradation	11	9
High	P17427	AP-2 complex subunit alpha-2 OS=Mus musculus OX=10090 GN=Ap2a2 PE=1 SV=2	0	68.269	33	29	61	18	938	104	6.93	79.48	29	Pf02883	11772	ENSMUSG00000002957	Ap2a2	mmu:11772; P17427; Q8C2J5; Q921V0		MHC class II antigen presentation; Recycling pathway of L1; Neutrophil degranulation; Cargo recognition for clathrin-mediated endocytosis; LDL clearance; Trafficking of GluR2-containing AMPA receptors; Retrograde neurotrophin signalling; WNT5A-dependent internalization of FZD4; WNT5A-dependent internalization of FZD2, FZD5 and ROR2; VLDLR internalisation and degradation	11	0
High	Q9DBG3	AP-2 complex subunit beta OS=Mus musculus OX=10090 GN=Ap2b1 PE=1 SV=1	0	95.747	29	30	67	16	937	104.5	5.38	113.06	30	Pf02883	71770	ENSMUSG00000035152	Ap2b1	mmu:71770; Q80XJ4; Q9DBG3		MHC class II antigen presentation; Cargo recognition for clathrin-mediated endocytosis; Trafficking of GluR2-containing AMPA receptors; Recycling pathway of L1; Retrograde neurotrophin signalling; WNT5A-dependent internalization of FZD4; LDL clearance; WNT5A-dependent internalization of FZD2, FZD5 and ROR2; VLDLR internalisation and degradation	10	13
High	P84091	AP-2 complex subunit mu OS=Mus musculus OX=10090 GN=Ap2m1 PE=1 SV=1	0	73.41	40	19	67	19	435	49.6	9.54	124.33	19	Pf00928, Pf01217	11773	ENSMUSG00000022841	Ap2m1	mmu:11773; P20172; P53679; P84091		MHC class II antigen presentation; Recycling pathway of L1; Cargo recognition for clathrin-mediated endocytosis; LDL clearance; Retrograde neurotrophin signalling; Formation of annular gap junctions; WNT5A-dependent internalization of FZD4; WNT5A-dependent internalization of FZD2, FZD5 and ROR2; VLDLR internalisation and degradation; Trafficking of GluR2-containing AMPA receptors	12	0
High	P62743	AP-2 complex subunit sigma OS=Mus musculus OX=10090 GN=Ap2s1 PE=1 SV=1	0	16.685	33	5	17	5	142	17	6.18	16.5	5	Pf01217	232910	ENSMUSG00000008036	Ap2s1	mmu:232910; P62743; P70626; P97626; Q00380		Cargo recognition for clathrin-mediated endocytosis; MHC class II antigen presentation; Trafficking of GluR2-containing AMPA receptors; Recycling pathway of L1; LDL clearance; Retrograde neurotrophin signalling; WNT5A-dependent internalization of FZD4; WNT5A-dependent internalization of FZD2, FZD5 and ROR2; VLDLR internalisation and degradation	10	0
High	Q9Z1T1	AP-3 complex subunit beta-1 OS=Mus musculus OX=10090 GN=Ap3b1 PE=1 SV=2	0	15.997	5	5	11	1	1105	122.7	5.66	27.58	5		11774	ENSMUSG00000021686	Ap3b1	E9QQ08; mmu:11774; Q91YR4; Q9Z1T1		Golgi Associated Vesicle Biogenesis	1	0
High	Q9JME5	AP-3 complex subunit beta-2 OS=Mus musculus OX=10090 GN=Ap3b2 PE=1 SV=2	0	118.188	34	32	81	28	1082	119.1	5.63	175.29	32		11775	ENSMUSG00000062444	Ap3b2	B2RTK2; mmu:11775; Q3UYP8; Q6QR53; Q8R1E5; Q9JME5			0	4
High	O54774	AP-3 complex subunit delta-1 OS=Mus musculus OX=10090 GN=Ap3d1 PE=1 SV=1	0	138.222	29	34	85	34	1199	135	7.37	176.75	34	Pf06375	11776	ENSMUSG00000020198	Ap3d1	mmu:11776; O54774			0	0
High	Q9JKC8	AP-3 complex subunit mu-1 OS=Mus musculus OX=10090 GN=Ap3m1 PE=1 SV=1	0	10.077	16	4	7	4	418	46.9	6.93	14.61	4	Pf00928, Pf01217	55946	ENSMUSG00000021824	Ap3m1	mmu:55946; Q5BKQ6; Q9JKC8			0	0
High	Q8R2R9	AP-3 complex subunit mu-2 OS=Mus musculus OX=10090 GN=Ap3m2 PE=1 SV=1	0	21.629	14	5	9	5	418	46.9	7.56	21.59	5	Pf00928, Pf01217	64933	ENSMUSG00000031539	Ap3m2	mmu:64933; Q3UYJ3; Q8R2R9; Q923G7			0	0
High	Q9DCR2	AP-3 complex subunit sigma-1 OS=Mus musculus OX=10090 GN=Ap3s1 PE=1 SV=2	0	6.524	18	3	4	3	193	21.7	5.39	4.95	3	Pf01217	11777	ENSMUSG00000024480	Ap3s1	mmu:11777; O88670; Q9DCR2		Golgi Associated Vesicle Biogenesis	1	0
High	Q3UHJ0	AP2-associated protein kinase 1 OS=Mus musculus OX=10090 GN=Aak1 PE=1 SV=2	0	143.591	38	27	60	26	959	103.3	6.7	161.43	27	Pf00069	269774	ENSMUSG00000057230	Aak1	B2RUJ0; mmu:269774; Q3TY53; Q3UHJ0; Q6ZPZ6; Q80XP6		Cargo recognition for clathrin-mediated endocytosis	2	1
High	Q80TK0	AP2-interacting clathrin-endocytosis protein OS=Mus musculus OX=10090 GN=Kiaa1107 PE=1 SV=6	0	124.839	27	26	51	26	1239	134	6.61	136	26	Pf15363	100503185	ENSMUSG00000111375	Kiaa1107	E9PUC9; E9QLA8; Q3TPG8; Q80TK0; Q8BRQ7; Q8BRS6			0	0
Low	Q7TS75	APC membrane recruitment protein 1 OS=Mus musculus OX=10090 GN=Amer1 PE=2 SV=3	0.243	0.752	1	1	1	1	1132	124.1	4.68	1.65	1	Pf09422	72345	ENSMUSG00000050332	Amer1	B1AUM2; mmu:72345; Q7TS75; Q8BT92; Q8C7P7		Beta-catenin phosphorylation cascade; Disassembly of the destruction complex and recruitment of AXIN to the membrane	3	0
High	Q8CCJ4	APC membrane recruitment protein 2 OS=Mus musculus OX=10090 GN=Amer2 PE=1 SV=2	0	27.289	13	7	13	7	672	69.9	6.64	29.6	7	Pf09422	72125	ENSMUSG00000021986	Amer2	mmu:72125; Q7TNC5; Q8CCJ4; Q8K0U9; Q9D0Q2			0	0
High	A2AJA9	Apical junction component 1 homolog OS=Mus musculus OX=10090 GN=Ajm1 PE=1 SV=1	0	24.244	9	8	17	8	974	107.1	9.11	31.59	8		381353	ENSMUSG00000029419	Ajm1	A2AJA9; mmu:381353; Q6P0A3			0	0
Low	E9Q414	Apolipoprotein B-100 OS=Mus musculus OX=10090 GN=Apob PE=1 SV=1	0.081	1.417	0	1	1	1	4505	509.1	6.81	2.04	1	Pf06448, Pf09172	238055	ENSMUSG00000020609	Apob	E9Q414; mmu:238055; Q3UH74; Q497D8; Q61314; Q61318; Q8CGG8		Cell surface interactions at the vascular wall; Cargo recognition for clathrin-mediated endocytosis; Retinoid metabolism and transport; Regulation of Insulin-like Growth Factor (IGF) transport and uptake by Insulin-like Growth Factor Binding Proteins (IGFBPs); Post-translational protein phosphorylation; Heme signaling; Regulation of TLR by endogenous ligand; Scavenging by Class B Receptors; Scave…	19	0
High	O35841	Apoptosis inhibitor 5 OS=Mus musculus OX=10090 GN=Api5 PE=1 SV=2	0	9.902	8	4	4	4	504	56.8	5.92	7.46	4		11800	ENSMUSG00000027193	Api5	mmu:11800; O35841; Q3U517; Q922L2			0	0
High	Q07813	Apoptosis regulator BAX OS=Mus musculus OX=10090 GN=Bax PE=1 SV=1	0	14.038	24	3	9	3	192	21.4	4.98	22.31	3	Pf00452	12028	ENSMUSG00000003873	Bax	mmu:12028; Q07813	Apoptosis; IL-5 Signaling Pathway; IL-7 Signaling Pathway; IL-3 Signaling Pathway; Peroxiredoxin 2 induced ovarian failure	Release of apoptotic factors from the mitochondria; Pyroptosis; TP53 Regulates Transcription of Genes Involved in G2 Cell Cycle Arrest; Activation, translocation and oligomerization of BAX	9	0
High	Q9Z0X1	Apoptosis-inducing factor 1, mitochondrial OS=Mus musculus OX=10090 GN=Aifm1 PE=1 SV=1	0	26.067	14	8	14	8	612	66.7	9.17	26.63	8	Pf14721	26926	ENSMUSG00000036932	Aifm1	mmu:26926; Q1L6K5; Q9Z0X1	Apoptosis Modulation by HSP70		1	0
Low	Q3TY86	Apoptosis-inducing factor 3 OS=Mus musculus OX=10090 GN=Aifm3 PE=1 SV=1	0.141	1.053	1	1	1	1	605	66.8	9.04	0	1	Pf07992, Pf14759	72168	ENSMUSG00000022763	Aifm3	mmu:72168; Q0VBD6; Q3TY86; Q4VAA4; Q8BWV0			0	0
High	Q62415	Apoptosis-stimulating of p53 protein 1 OS=Mus musculus OX=10090 GN=Ppp1r13b PE=1 SV=2	0	32.109	14	12	24	12	1087	119.1	6.68	45.97	12	Pf12796	21981	ENSMUSG00000021285	Ppp1r13b	mmu:21981; Q62415		Regulation of TP53 Activity through Association with Co-factors	1	0
Low	Q8CG79	Apoptosis-stimulating of p53 protein 2 OS=Mus musculus OX=10090 GN=Tp53bp2 PE=1 SV=3	0.151	1.009	1	1	1	1	1128	125.2	6.34	0	1	Pf14604	209456		Tp53bp2	mmu:209456; Q3UYM7; Q8CG79; Q8K2L5		Regulation of TP53 Activity through Association with Co-factors	1	0
High	Q9JIX8	Apoptotic chromatin condensation inducer in the nucleus OS=Mus musculus OX=10090 GN=Acin1 PE=1 SV=3	0	19.839	7	9	10	9	1338	150.6	5.91	14.59	9	Pf02037	56215	ENSMUSG00000022185	Acin1	B8JJ87; mmu:56215; Q9CSN7; Q9CSR9; Q9CSX7; Q9JIX8; Q9R046; Q9R047	mRNA processing	Apoptotic cleavage of cellular proteins	2	0
High	Q9D842	Aprataxin and PNK-like factor OS=Mus musculus OX=10090 GN=Aplf PE=1 SV=2	0.009	3.281	3	1	1	1	499	54.9	5.21	2.61	1	Pf17913	72103	ENSMUSG00000030051	Aplf	mmu:72103; Q8BZL5; Q99LX6; Q9D842			0	0
High	P55088	Aquaporin-4 OS=Mus musculus OX=10090 GN=Aqp4 PE=1 SV=2	0	10.262	15	4	6	4	323	34.4	7.42	14.89	4	Pf00230	11829	ENSMUSG00000024411	Aqp4	mmu:11829; P55088; P97818; Q4FJP1; Q61131; Q61132; Q8VHE4; Q8VHE5; Q9EQI3	Spinal Cord Injury	Vasopressin regulates renal water homeostasis via Aquaporins; Passive transport by Aquaporins	3	0
Low	P39655	Arachidonate 12-lipoxygenase, 12S-type OS=Mus musculus OX=10090 GN=Alox12 PE=1 SV=4	0.229	0.784	2	1	1	1	663	75.3	6.19	0	1	Pf00305, Pf01477	11684	ENSMUSG00000000320	Alox12	mmu:11684; P39655; Q8BHG4	Eicosanoid Synthesis; Eicosanoid metabolism via Lipo Oxygenases (LOX)	Synthesis of 12-eicosatetraenoic acid derivatives; Synthesis of Lipoxins (LX); Biosynthesis of DHA-derived SPMs; Biosynthesis of DPAn-6 SPMs; Synthesis of Hepoxilins (HX) and Trioxilins (TrX); Biosynthesis of DPAn-3-derived maresins	8	0
High	Q68FF6	ARF GTPase-activating protein GIT1 OS=Mus musculus OX=10090 GN=Git1 PE=1 SV=1	0	105.619	37	27	59	27	770	85.2	6.93	130.58	27	Pf08518, Pf12205, Pf12796	216963	ENSMUSG00000011877	Git1	Q68FF6	Regulation of Actin Cytoskeleton; EGFR1 Signaling Pathway	RAC1 GTPase cycle; CDC42 GTPase cycle; RAC2 GTPase cycle; RAC3 GTPase cycle; RHOU GTPase cycle; RHOV GTPase cycle; Ephrin signaling; RHOQ GTPase cycle	10	0
High	Q8K2K6	Arf-GAP domain and FG repeat-containing protein 1 OS=Mus musculus OX=10090 GN=Agfg1 PE=1 SV=2	0	21.009	19	9	16	9	561	58	8.63	16.57	9		15463	ENSMUSG00000026159	Agfg1	mmu:15463; O70448; Q8BQL5; Q8CDK9; Q8K2K6		Clathrin-mediated endocytosis	1	0
High	Q80WC7	Arf-GAP domain and FG repeat-containing protein 2 OS=Mus musculus OX=10090 GN=Agfg2 PE=1 SV=1	0	28.192	21	7	14	7	479	48.9	9.1	27.16	7		231801	ENSMUSG00000029722	Agfg2	mmu:231801; Q80WC7; Q8BKS5; Q99J67			0	0
High	Q6ZQK5	Arf-GAP with coiled-coil, ANK repeat and PH domain-containing protein 2 OS=Mus musculus OX=10090 GN=Acap2 PE=1 SV=2	0	27.32	17	11	14	11	770	87.2	6.68	21.57	11	Pf12796, Pf16746	78618	ENSMUSG00000049076	Acap2	mmu:78618; Q3UHL4; Q6ZQK5; Q811F3; Q9CTS8			0	0
High	Q8BXK8	Arf-GAP with GTPase, ANK repeat and PH domain-containing protein 1 OS=Mus musculus OX=10090 GN=Agap1 PE=1 SV=1	0	50.171	16	12	21	6	857	94.4	7.94	45.3	12	Pf12796	347722	ENSMUSG00000055013	Agap1	mmu:347722; Q3UHA0; Q6ZPX9; Q8BXK8; Q8BZG0			0	0
High	Q3UHD9	Arf-GAP with GTPase, ANK repeat and PH domain-containing protein 2 OS=Mus musculus OX=10090 GN=Agap2 PE=1 SV=1	0	96.059	31	28	56	27	1186	124.4	9.89	120.99	28	Pf12796	216439	ENSMUSG00000025422	Agap2	mmu:216439; Q3UHD9; Q5DU45			0	1
High	Q8VHH5	Arf-GAP with GTPase, ANK repeat and PH domain-containing protein 3 OS=Mus musculus OX=10090 GN=Agap3 PE=1 SV=1	0	64.535	23	18	41	13	910	97.9	7.75	70.59	18	Pf12796			Agap3	Q812F7; Q8VHH5			0	5
Low	Q4LDD4	Arf-GAP with Rho-GAP domain, ANK repeat and PH domain-containing protein 1 OS=Mus musculus OX=10090 GN=Arap1 PE=1 SV=2	0.236	0.77	1	1	1	1	1452	162.2	6.18	2.4	1	Pf00788, Pf07647	69710	ENSMUSG00000032812	Arap1	B2RUJ3; mmu:69710; Q3UDD2; Q3US99; Q4LDD4; Q58ET6; Q6PEQ9; Q6ZQ48		CDC42 GTPase cycle; RAC1 GTPase cycle; RHOA GTPase cycle; PTK6 Regulates RTKs and Their Effectors AKT1 and DOK1	4	0
High	Q8BZ05	Arf-GAP with Rho-GAP domain, ANK repeat and PH domain-containing protein 2 OS=Mus musculus OX=10090 GN=Arap2 PE=1 SV=2	0	8.379	3	4	6	4	1703	193.3	7.18	11.68	4	Pf00536, Pf00788			Arap2	Q80TX2; Q8BZ05; Q8C3T2; Q8VEL6		RHOA GTPase cycle; CDC42 GTPase cycle; RAC1 GTPase cycle; RAC3 GTPase cycle	4	0
Medium	Q8R5G7	Arf-GAP with Rho-GAP domain, ANK repeat and PH domain-containing protein 3 OS=Mus musculus OX=10090 GN=Arap3 PE=1 SV=3	0.028	2.114	2	2	3	2	1538	169.6	6.84	0	2	Pf00788, Pf07647	106952	ENSMUSG00000024451	Arap3	E9QMK7; mmu:106952; Q5DTN4; Q6NVF1; Q8R5G6; Q8R5G7		RHOA GTPase cycle; RAC1 GTPase cycle; CDC42 GTPase cycle; RAC3 GTPase cycle	4	0
High	Q9QWY8	Arf-GAP with SH3 domain, ANK repeat and PH domain-containing protein 1 OS=Mus musculus OX=10090 GN=Asap1 PE=1 SV=2	0	65.182	23	20	42	20	1147	127.3	7.64	77.97	20	Pf14604, Pf16746	13196	ENSMUSG00000022377	Asap1	mmu:13196; O08612; Q505F0; Q80TG8; Q80UV6; Q99LV8; Q9QWY8; Q9Z2B6	EGFR1 Signaling Pathway	VxPx cargo-targeting to cilium	2	0
High	Q7SIG6	Arf-GAP with SH3 domain, ANK repeat and PH domain-containing protein 2 OS=Mus musculus OX=10090 GN=Asap2 PE=1 SV=3	0	28.815	13	9	15	9	958	106.7	6.65	34.97	9	Pf12796, Pf14604, Pf16746	211914	ENSMUSG00000052632	Asap2	mmu:211914; Q501K1; Q66JN2; Q7SIG6			0	0
High	Q8K221	Arfaptin-2 OS=Mus musculus OX=10090 GN=Arfip2 PE=1 SV=2	0	19.584	18	5	14	5	341	37.7	5.87	25.37	5		76932	ENSMUSG00000030881	Arfip2	mmu:76932; Q3U3G6; Q8K221; Q9D7M3		Retrograde transport at the Trans-Golgi-Network	1	0
High	Q3UL36	Arginine and glutamate-rich protein 1 OS=Mus musculus OX=10090 GN=Arglu1 PE=1 SV=2	0	23.312	27	11	21	10	271	32.9	10.36	42.42	11	Pf15346	234023	ENSMUSG00000040459	Arglu1	mmu:234023; Q3UL36; Q80XJ0			0	1
High	Q9D0I9	Arginine--tRNA ligase, cytoplasmic OS=Mus musculus OX=10090 GN=Rars PE=1 SV=2	0	28.882	14	7	13	7	660	75.6	7.55	28.6	7	Pf00750, Pf03485	104458	ENSMUSG00000018848	Rars1	mmu:104458; Q3THP2; Q3TM73; Q3U8R2; Q3U930; Q5SXA8; Q8VDW1; Q9D0I9			0	0
Low	Q80TZ9	Arginine-glutamic acid dipeptide repeats protein OS=Mus musculus OX=10090 GN=Rere PE=1 SV=3	0.122	1.141	1	1	1	1	1558	171.6	7.69	0	1	Pf00320	68703	ENSMUSG00000039852	Rere	A2A7T4; mmu:68703; Q80TZ9			0	0
Low	A2RTL5	Arginine/serine-rich coiled-coil protein 2 OS=Mus musculus OX=10090 GN=Rsrc2 PE=2 SV=1	0.176	0.922	2	1	1	1	376	43.9	11.46	1.66	1	Pf15477	208606	ENSMUSG00000029422	Rsrc2	A2RTL5; mmu:208606	mRNA processing		1	0
High	Q91YI0	Argininosuccinate lyase OS=Mus musculus OX=10090 GN=Asl PE=1 SV=1	0.004	4.097	3	2	4	1	464	51.7	6.96	4.32	2	Pf00206	109900	ENSMUSG00000025533	Asl	mmu:109900; Q3UFA2; Q91YI0	Alanine and aspartate metabolism	Urea cycle	2	0
High	P16460	Argininosuccinate synthase OS=Mus musculus OX=10090 GN=Ass1 PE=1 SV=1	0	6.088	8	4	7	4	412	46.6	8.22	5.56	4	Pf00764	11898	ENSMUSG00000076441	Ass1	mmu:11898; P16460	Alanine and aspartate metabolism	Urea cycle	2	0
High	Q9Z2A5	Arginyl-tRNA--protein transferase 1 OS=Mus musculus OX=10090 GN=Ate1 PE=1 SV=2	0	14.077	8	3	5	3	516	59.1	8.19	15.94	3		11907	ENSMUSG00000030850	Ate1	mmu:11907; Q8CFP7; Q9Z2A4; Q9Z2A5			0	0
Low	Q3UKZ7	ARL14 effector protein-like OS=Mus musculus OX=10090 GN=Arl14epl PE=2 SV=1	0.103	1.252	5	1	3	1	152	17.5	8.38	1.63	1	Pf14949	381142	ENSMUSG00000073568	Arl14epl	mmu:381142; Q3UKZ7			0	0
High	P98203	Armadillo repeat protein deleted in velo-cardio-facial syndrome homolog OS=Mus musculus OX=10090 GN=Arvcf PE=1 SV=2	0	46.257	26	16	26	16	962	105	6.64	59.89	16		11877	ENSMUSG00000000325; ENSMUSG00000098615	Arvcf	mmu:11877; P98203; Q6PGJ6; Q8BQ36; Q8BRF2; Q8C3U7; Q924L2; Q924L3; Q924L4; Q924L5			0	0
High	Q9D7A8	Armadillo repeat-containing protein 1 OS=Mus musculus OX=10090 GN=Armc1 PE=1 SV=1	0	7.024	9	2	4	2	282	31.2	5.57	9.92	2		74252	ENSMUSG00000027599	Armc1	mmu:74252; Q8CBW1; Q9D7A8			0	0
High	Q9D0L7	Armadillo repeat-containing protein 10 OS=Mus musculus OX=10090 GN=Armc10 PE=1 SV=1	0.001	5.521	9	2	3	2	306	33.3	7.99	3.31	2		67211	ENSMUSG00000038525	Armc10	mmu:67211; Q80ZY2; Q9CUN3; Q9CZ87; Q9D0L7			0	0
Low	Q80X86	Armadillo repeat-containing protein 12 OS=Mus musculus OX=10090 GN=Armc12 PE=2 SV=1	0.241	0.759	2	1	1	1	340	38.5	7.43	0	1		67645	ENSMUSG00000024223	Armc12	mmu:67645; Q80X86; Q9D564; Q9DAN7			0	0
Low	Q3URY6	Armadillo repeat-containing protein 2 OS=Mus musculus OX=10090 GN=Armc2 PE=2 SV=3	0.099	1.278	2	1	2	1	854	95.3	8.03	2.35	1		213402	ENSMUSG00000071324	Armc2	mmu:213402; Q3URY6			0	0
High	Q8BNU0	Armadillo repeat-containing protein 6 OS=Mus musculus OX=10090 GN=Armc6 PE=1 SV=1	0	8.969	12	4	4	4	468	50.7	6	5.19	4		76813	ENSMUSG00000002343	Armc6	mmu:76813; Q8BNU0; Q8C4P5; Q8C7S1; Q8K2S7; Q99JQ2; Q9CWE4			0	0
Medium	Q9DBR3	Armadillo repeat-containing protein 8 OS=Mus musculus OX=10090 GN=Armc8 PE=1 SV=2	0.018	2.384	3	2	2	2	673	75.3	6.73	1.75	2		74125	ENSMUSG00000032468	Armc8	mmu:74125; Q8BGV2; Q8BUP3; Q9DBR3		Neutrophil degranulation	1	0
Low	Q9CX83	Armadillo repeat-containing X-linked protein 1 OS=Mus musculus OX=10090 GN=Armcx1 PE=1 SV=1	0.248	0.741	2	1	1	1	456	50.6	9.33	0	1		78248	ENSMUSG00000033460	Armcx1	mmu:78248; Q9CX83			0	0
High	Q6A058	Armadillo repeat-containing X-linked protein 2 OS=Mus musculus OX=10090 GN=Armcx2 PE=2 SV=2	0.002	4.903	3	1	2	1	784	81	9.33	5.8	1		67416	ENSMUSG00000033436	Armcx2	A2AKS5; mmu:67416; Q6A058; Q9CXI9			0	0
Medium	Q6PD19	Armadillo-like helical domain-containing protein 3 OS=Mus musculus OX=10090 GN=Armh3 PE=1 SV=2	0.01	2.822	2	2	3	2	689	78.6	6.6	6.48	2	Pf08427	71617	ENSMUSG00000039901	Armh3	mmu:71617; Q3TWB1; Q6PD19; Q80V50			0	0
High	O88533	Aromatic-L-amino-acid decarboxylase OS=Mus musculus OX=10090 GN=Ddc PE=1 SV=1	0	8.451	3	1	1	1	480	53.8	6.6	4.64	1	Pf00282	13195	ENSMUSG00000020182	Ddc	mmu:13195; O88533	SIDS Susceptibility Pathways; Dopaminergic Neurogenesis; Parkinsons Disease Pathway; Biogenic Amine Synthesis; Tryptophan metabolism	Serotonin and melatonin biosynthesis; Catecholamine biosynthesis	7	0
Low	Q9D0A3	Arpin OS=Mus musculus OX=10090 GN=Arpin PE=1 SV=1	0.255	0.722	6	1	1	1	226	25.2	5.19	2.12	1		70420	ENSMUSG00000039043	Arpin	mmu:70420; Q3U1F3; Q8CA84; Q9D0A3			0	0
Low	Q99KN1	Arrestin domain-containing protein 1 OS=Mus musculus OX=10090 GN=Arrdc1 PE=1 SV=2	0.195	0.868	3	1	1	1	434	46.3	7.21	0	1	Pf00339, Pf02752	215705	ENSMUSG00000026972	Arrdc1	A2AIS7; A2AIS8; mmu:215705; Q3TDT6; Q8VEG7; Q99KN1			0	0
High	Q91WU5	Arsenite methyltransferase OS=Mus musculus OX=10090 GN=As3mt PE=1 SV=2	0.005	3.956	3	1	1	1	376	41.8	5.86	3	1	Pf13847	57344	ENSMUSG00000003559	As3mt	A6H5W4; E9QLU6; mmu:57344; Q91WU5; Q9QZT1		Methylation	1	0
Low	P30561	Aryl hydrocarbon receptor OS=Mus musculus OX=10090 GN=Ahr PE=1 SV=3	0.069	1.537	3	2	2	1	848	95	6.47	1.61	2	Pf08447	11622		Ahr	mmu:11622; P30561; Q8QZX6; Q8R4S3; Q99P79; Q9QVY1	Adipogenesis genes	Aryl hydrocarbon receptor signalling; Xenobiotics; Endogenous sterols	5	0
Low	P50295	Arylamine N-acetyltransferase 2 OS=Mus musculus OX=10090 GN=Nat2 PE=1 SV=1	0.13	1.099	6	1	1	1	290	33.7	5.88	0	1		17961	ENSMUSG00000051147	Nat2	mmu:17961; P50295	Metapathway biotransformation	Acetylation	2	0
Medium	P50429	Arylsulfatase B OS=Mus musculus OX=10090 GN=Arsb PE=1 SV=3	0.018	2.375	3	1	1	1	534	59.6	7.24	2	1	Pf00884	11881		Arsb	mmu:11881; P50429; Q32KJ1; Q3TYV7; Q3U4Q6; Q8C404		Neutrophil degranulation; Glycosphingolipid metabolism; CS/DS degradation; The activation of arylsulfatases	4	0
High	Q61024	Asparagine synthetase [glutamine-hydrolyzing] OS=Mus musculus OX=10090 GN=Asns PE=1 SV=3	0	18.662	15	6	12	6	561	64.2	6.58	28.62	6		27053	ENSMUSG00000029752	Asns	mmu:27053; Q3TJA1; Q61024; Q8BPC8		Aspartate and asparagine metabolism	1	0
High	Q8BP47	Asparagine--tRNA ligase, cytoplasmic OS=Mus musculus OX=10090 GN=NARS1 PE=1 SV=2	0	55.503	32	18	32	18	559	64.2	5.86	68.96	18	Pf00152, Pf01336	70223	ENSMUSG00000024587	NARS1	mmu:70223; Q3T9A7; Q7TPX0; Q8BP47; Q9CRY5			0	0
High	P05201	Aspartate aminotransferase, cytoplasmic OS=Mus musculus OX=10090 GN=Got1 PE=1 SV=3	0	10.226	19	6	6	6	413	46.2	7.14	6.62	6	Pf00155	14718	ENSMUSG00000025190	Got1	mmu:14718; P05201; Q3UJH8	Glycolysis and Gluconeogenesis; Alanine and aspartate metabolism	Gluconeogenesis; Aspartate and asparagine metabolism	4	0
High	P05202	Aspartate aminotransferase, mitochondrial OS=Mus musculus OX=10090 GN=Got2 PE=1 SV=1	0	15.149	9	4	6	3	430	47.4	9	10.39	4	Pf00155	14719	ENSMUSG00000031672	Got2	mmu:14719; O09188; P05202; Q3TIP6; Q3UD91; Q5HZH5	Glycolysis and Gluconeogenesis; Alanine and aspartate metabolism	Gluconeogenesis; Aspartate and asparagine metabolism; Glyoxylate metabolism and glycine degradation; Glutamate and glutamine metabolism	6	0
Medium	Q2TA57	Aspartate beta-hydroxylase domain-containing protein 1 OS=Mus musculus OX=10090 GN=Asphd1 PE=2 SV=2	0.044	1.855	3	1	1	1	360	38.2	8.25	0	1	Pf05118	233879	ENSMUSG00000046378	Asphd1	mmu:233879; Q2TA57			0	0
High	Q80VP9	Aspartate beta-hydroxylase domain-containing protein 2 OS=Mus musculus OX=10090 GN=Asphd2 PE=1 SV=1	0.005	3.813	3	1	2	1	343	38.7	7.05	2.77	1	Pf05118	72898	ENSMUSG00000029348	Asphd2	mmu:72898; Q80VP9; Q9CUZ2			0	0
High	Q922B2	Aspartate--tRNA ligase, cytoplasmic OS=Mus musculus OX=10090 GN=Dars PE=1 SV=2	0	36.766	29	13	22	13	501	57.1	6.49	47.35	13	Pf00152	226414	ENSMUSG00000026356	Dars1	mmu:226414; Q3U987; Q922B2	Alanine and aspartate metabolism		1	0
High	Q9Z2W0	Aspartyl aminopeptidase OS=Mus musculus OX=10090 GN=Dnpep PE=1 SV=2	0.009	3.077	3	1	2	1	473	52.2	7.25	4.92	1		13437	ENSMUSG00000026209	Dnpep	mmu:13437; Q56A00; Q9Z2W0			0	0
High	Q8BSY0	Aspartyl/asparaginyl beta-hydroxylase OS=Mus musculus OX=10090 GN=Asph PE=1 SV=1	0	28.907	17	9	13	9	741	83	5.08	33.09	9	Pf05118, Pf05279, Pf13432	65973	ENSMUSG00000028207	Asph	mmu:65973; Q8BSY0; Q9EPA6; Q9EQ64		Ion homeostasis; Stimuli-sensing channels	2	0
High	Q62048	Astrocytic phosphoprotein PEA-15 OS=Mus musculus OX=10090 GN=Pea15 PE=1 SV=1	0.001	5.606	16	2	4	2	130	15	5.02	7.93	2	Pf01335	18611	ENSMUSG00000013698	Pea15	mmu:18611; Q3U5N7; Q62048		RAF/MAP kinase cascade; RAF-independent MAPK1/3 activation	2	0
High	Q61137	Astrotactin-1 OS=Mus musculus OX=10090 GN=Astn1 PE=1 SV=4	0	25.275	6	4	8	4	1302	144.8	5.21	24.57	4	Pf18411, Pf19441	11899	ENSMUSG00000026587	Astn1	G5E8A1; mmu:11899; Q505A0; Q61137; Q7TQG3; Q8CHH2			0	0
Medium	Q6PAL7	AT-hook DNA-binding motif-containing protein 1 OS=Mus musculus OX=10090 GN=Ahdc1 PE=1 SV=1	0.033	1.994	1	1	1	1	1594	168	8.97	0	1	Pf15735	230793	ENSMUSG00000037692	Ahdc1	mmu:230793; Q5U5N7; Q6PAL7; Q8C4Y6; Q8VCU7			0	0
High	A2BH40	AT-rich interactive domain-containing protein 1A OS=Mus musculus OX=10090 GN=Arid1a PE=1 SV=1	0	12.797	2	4	7	4	2283	241.9	6.68	15.96	4	Pf01388	93760	ENSMUSG00000007880	Arid1a	A2BH40; mmu:93760; Q640Q1; Q925Q1		RUNX1 interacts with co-factors whose precise effect on RUNX1 targets is not known; RMTs methylate histone arginines	2	0
High	E9Q4N7	AT-rich interactive domain-containing protein 1B OS=Mus musculus OX=10090 GN=Arid1b PE=1 SV=1	0	9.608	2	4	6	4	2244	237.6	6.73	10.76	4	Pf01388	239985	ENSMUSG00000069729	Arid1b	E9Q4N7; mmu:239985		RUNX1 interacts with co-factors whose precise effect on RUNX1 targets is not known; RMTs methylate histone arginines	2	0
Low	Q3U108	AT-rich interactive domain-containing protein 5A OS=Mus musculus OX=10090 GN=Arid5a PE=1 SV=1	0.103	1.252	1	1	1	1	590	63.9	9.03	1.63	1	Pf01388	214855	ENSMUSG00000037447	Arid5a	mmu:214855; Q3TZS4; Q3U0F0; Q3U0S2; Q3U108; Q3UDA3; Q3UDZ6; Q8BI45; Q8BYB5; Q8R2W1			0	0
Low	P54254	Ataxin-1 OS=Mus musculus OX=10090 GN=Atxn1 PE=1 SV=2	0.141	1.049	1	1	1	1	791	83.7	8.16	2.35	1		20238	ENSMUSG00000046876	Atxn1	mmu:20238; P54254; Q8C866	mRNA processing		1	0
Medium	P0C7T6	Ataxin-1-like OS=Mus musculus OX=10090 GN=Atxn1l PE=1 SV=1	0.033	2.016	2	1	2	1	687	73.3	6.49	3.91	1		52335	ENSMUSG00000069895	Atxn1l	mmu:52335; P0C7T6			0	0
High	O70305	Ataxin-2 OS=Mus musculus OX=10090 GN=Atxn2 PE=1 SV=1	0	47.824	11	14	22	11	1285	136.4	9.55	54.78	14	Pf07145	20239		Atxn2	mmu:20239; O70305; P97421			0	1
High	Q7TQH0	Ataxin-2-like protein OS=Mus musculus OX=10090 GN=Atxn2l PE=1 SV=1	0	66.472	16	18	34	16	1049	110.6	8.85	65.3	18	Pf07145	233871	ENSMUSG00000032637	Atxn2l	mmu:233871; Q7TQH0; Q80XN9; Q8K059			0	2
High	Q9CVD2	Ataxin-3 OS=Mus musculus OX=10090 GN=Atxn3 PE=1 SV=2	0.002	5.226	6	1	1	1	355	40.5	4.83	3.38	1	Pf02099	110616	ENSMUSG00000021189	Atxn3	mmu:110616; Q9CVD2		Josephin domain DUBs; FOXO-mediated transcription of oxidative stress, metabolic and neuronal genes	2	0
Low	Q8R4I1	Ataxin-7 OS=Mus musculus OX=10090 GN=Atxn7 PE=1 SV=2	0.257	0.719	2	1	1	1	867	92.6	9.86	0	1		246103	ENSMUSG00000021738	Atxn7	E9QPX9; mmu:246103; Q8BL17; Q8R4I1		Ub-specific processing proteases	1	0
Low	Q3UD01	Ataxin-7-like protein 3B OS=Mus musculus OX=10090 GN=Atxn7l3b PE=1 SV=1	0.205	0.841	13	1	1	1	97	10.7	4.32	0	1		382423	ENSMUSG00000074748	Atxn7l3b	mmu:382423; Q3UD01			0	0
Medium	D3YXK1	Atherin OS=Mus musculus OX=10090 GN=Samd1 PE=1 SV=1	0.029	2.087	3	1	1	1	519	54.5	7.47	0	1		666704	ENSMUSG00000079003	Samd1	D3YXK1; mmu:666704			0	0
High	Q8BH66	Atlastin-1 OS=Mus musculus OX=10090 GN=Atl1 PE=1 SV=1	0	61.381	28	17	33	16	558	63.3	6.49	70.75	17	Pf02263	73991	ENSMUSG00000021066	Atl1	mmu:73991; Q8BH66; Q8BJH5			0	1
High	Q6PA06	Atlastin-2 OS=Mus musculus OX=10090 GN=Atl2 PE=1 SV=1	0	28.014	17	9	14	8	583	66.2	5.43	34.26	9	Pf02263	56298	ENSMUSG00000059811	Atl2	mmu:56298; Q3UX01; Q6PA06; Q7TMM3			0	0
High	Q9CQQ7	ATP synthase F(0) complex subunit B1, mitochondrial OS=Mus musculus OX=10090 GN=Atp5pb PE=1 SV=1	0	34.607	24	9	24	8	256	28.9	9.06	51.11	9		11950	ENSMUSG00000000563	Atp5pb	mmu:11950; Q9CQQ7	Oxidative phosphorylation; Electron Transport Chain	Formation of ATP by chemiosmotic coupling; Cristae formation	4	0
High	Q9CR84	ATP synthase F(0) complex subunit C1, mitochondrial OS=Mus musculus OX=10090 GN=Atp5mc1 PE=1 SV=1	0.004	4.004	5	1	7	1	136	14.2	10.01	11.77	1	Pf00137	11951	ENSMUSG00000006057	Atp5mc1	mmu:11951; Q3TIE9; Q9CR84	Oxidative phosphorylation	Formation of ATP by chemiosmotic coupling; Cristae formation	3	0
High	Q78IK2	ATP synthase membrane subunit DAPIT, mitochondrial OS=Mus musculus OX=10090 GN=Atp5md PE=1 SV=1	0	6.044	47	4	7	4	58	6.4	9.83	13.5	4	Pf14960	66477	ENSMUSG00000071528	Atp5md	mmu:66477; Q78IK2; Q9ER48			0	0
Low	Q811I0	ATP synthase mitochondrial F1 complex assembly factor 1 OS=Mus musculus OX=10090 GN=Atpaf1 PE=1 SV=1	0.059	1.632	8	1	2	1	324	36.3	8.19	2.52	1			ENSMUSG00000028710	Atpaf1	Q811I0			0	0
High	P03930	ATP synthase protein 8 OS=Mus musculus OX=10090 GN=Mtatp8 PE=1 SV=1	0.005	3.918	55	4	6	4	67	7.8	9.88	4.19	4	Pf00895	17706	ENSMUSG00000064356	Mtatp8	mmu:17706; P03930	Electron Transport Chain	Formation of ATP by chemiosmotic coupling; Cristae formation	3	0
High	Q03265	ATP synthase subunit alpha, mitochondrial OS=Mus musculus OX=10090 GN=Atp5f1a PE=1 SV=1	0	153.267	56	36	160	35	553	59.7	9.19	347.8	36	Pf02874	11946	ENSMUSG00000025428; ENSMUSG00000116276	Atp5f1a	mmu:11946; Q03265; Q3TFN0; Q3THN8; Q3TPR0; Q3TPV3; Q3TZU3; Q3UIR7; Q543Y6	Oxidative phosphorylation; Electron Transport Chain	Formation of ATP by chemiosmotic coupling; Cristae formation	4	1
High	P56379	ATP synthase subunit ATP5MPL, mitochondrial OS=Mus musculus OX=10090 GN=Atp5mpl PE=1 SV=1	0.002	4.871	34	2	4	2	58	6.7	9.99	2.87	2		70257	ENSMUSG00000021290	Atp5mpl	mmu:70257; P56379			0	0
High	P56480	ATP synthase subunit beta, mitochondrial OS=Mus musculus OX=10090 GN=Atp5f1b PE=1 SV=2	0	93.291	48	19	98	19	529	56.3	5.34	255.02	19	Pf02874	11947	ENSMUSG00000025393	Atp5f1b	mmu:11947; P56480; Q0QEP4; Q3TFD7; Q3TIP9; Q3TK44; Q3TWD5; Q3TX28; Q3U6U4; Q3U774; Q3UB69; Q3UF69; Q8CI65; Q8VEJ5; Q9CTI7; Q9CWX7	Oxidative phosphorylation; Electron Transport Chain	Formation of ATP by chemiosmotic coupling; Cristae formation; Mitochondrial protein import	5	0
High	Q9DCX2	ATP synthase subunit d, mitochondrial OS=Mus musculus OX=10090 GN=Atp5pd PE=1 SV=3	0	51.035	84	14	30	14	161	18.7	5.69	66.49	14		71679	ENSMUSG00000034566	Atp5pd	B1ASE1; mmu:71679; Q542H1; Q7M0I0; Q91YK9; Q9DCX2	Oxidative phosphorylation; Electron Transport Chain	Formation of ATP by chemiosmotic coupling; Cristae formation	4	0
High	Q9D3D9	ATP synthase subunit delta, mitochondrial OS=Mus musculus OX=10090 GN=Atp5f1d PE=1 SV=1	0	11.698	17	3	8	2	168	17.6	5.08	21.98	3	Pf02823	66043	ENSMUSG00000003072	Atp5f1d	mmu:66043; Q9D3D9	Oxidative phosphorylation; Electron Transport Chain	Formation of ATP by chemiosmotic coupling; Cristae formation	4	0
High	Q06185	ATP synthase subunit e, mitochondrial OS=Mus musculus OX=10090 GN=Atp5me PE=1 SV=2	0	24.11	65	5	23	4	71	8.2	9.35	41.04	5		11958	ENSMUSG00000050856	Atp5me	mmu:11958; P70342; Q06185	Oxidative phosphorylation; Electron Transport Chain	Formation of ATP by chemiosmotic coupling; Cristae formation	4	1
High	P56382	ATP synthase subunit epsilon, mitochondrial OS=Mus musculus OX=10090 GN=Atp5f1e PE=1 SV=2	0	6.373	42	3	5	3	52	5.8	10.01	9.77	3	Pf04627	67126	ENSMUSG00000016252	Atp5f1e	mmu:67126; P56382	Oxidative phosphorylation; Electron Transport Chain	Formation of ATP by chemiosmotic coupling; Cristae formation	4	0
High	P56135	ATP synthase subunit f, mitochondrial OS=Mus musculus OX=10090 GN=Atp5mf PE=1 SV=3	0	6.304	26	2	3	2	88	10.3	9.95	5.02	2	Pf10206	57423	ENSMUSG00000038690	Atp5mf	mmu:57423; P56135; Q3THX9; Q9JMF4	Oxidative phosphorylation; Electron Transport Chain	Formation of ATP by chemiosmotic coupling; Cristae formation	4	0
High	Q9CPQ8	ATP synthase subunit g, mitochondrial OS=Mus musculus OX=10090 GN=Atp5mg PE=1 SV=1	0	7.166	47	4	12	4	103	11.4	9.74	10.04	4	Pf04718	27425	ENSMUSG00000038717	Atp5mg	mmu:27425; O70590; Q5M9M8; Q9CPQ8	Oxidative phosphorylation; Electron Transport Chain	Formation of ATP by chemiosmotic coupling; Cristae formation	4	0
High	Q91VR2	ATP synthase subunit gamma, mitochondrial OS=Mus musculus OX=10090 GN=Atp5f1c PE=1 SV=1	0	50.325	44	14	45	14	298	32.9	9.01	59.43	14		11949	ENSMUSG00000025781	Atp5f1c	mmu:11949; Q91VR2	Electron Transport Chain	Formation of ATP by chemiosmotic coupling; Cristae formation	3	0
High	Q9DB20	ATP synthase subunit O, mitochondrial OS=Mus musculus OX=10090 GN=Atp5po PE=1 SV=1	0	19.977	33	7	16	7	213	23.3	9.99	27.23	7	Pf00213	28080	ENSMUSG00000022956	Atp5po	mmu:28080; Q9DB20	Oxidative phosphorylation; Electron Transport Chain	Formation of ATP by chemiosmotic coupling; Cristae formation	4	0
High	P97450	ATP synthase-coupling factor 6, mitochondrial OS=Mus musculus OX=10090 GN=Atp5pf PE=1 SV=1	0	20.292	44	5	10	5	108	12.5	9.36	24.41	5	Pf05511	11957	ENSMUSG00000022890	Atp5pf	mmu:11957; P97450	Oxidative phosphorylation; Electron Transport Chain	Formation of ATP by chemiosmotic coupling; Cristae formation	4	0
Low	Q5SSE9	ATP-binding cassette sub-family A member 13 OS=Mus musculus OX=10090 GN=Abca13 PE=2 SV=1	0.262	0.712	0	1	1	1	5034	568.5	6.52	1.94	1	Pf00005	268379	ENSMUSG00000004668	Abca13	mmu:268379; Q5SSE9; Q80T20; Q8BHZ2; Q8CB91		Neutrophil degranulation	1	0
High	Q8R420	ATP-binding cassette sub-family A member 3 OS=Mus musculus OX=10090 GN=Abca3 PE=1 SV=3	0.002	4.773	1	3	3	3	1704	191.8	7.17	4.26	3	Pf00005	27410	ENSMUSG00000024130	Abca3	mmu:27410; Q3U3L4; Q8R420		ABC transporters in lipid homeostasis; Surfactant metabolism	2	0
Low	Q8K442	ATP-binding cassette sub-family A member 8-A OS=Mus musculus OX=10090 GN=Abca8a PE=1 SV=2	0.162	0.965	0	1	1	1	1620	184.1	7.28	0	1	Pf00005	217258	ENSMUSG00000041828	Abca8a	A2AB96; mmu:217258; Q6PAV3; Q8C0A9; Q8K442; Q8R0R4			0	0
High	Q9DC29	ATP-binding cassette sub-family B member 6, mitochondrial OS=Mus musculus OX=10090 GN=Abcb6 PE=1 SV=1	0.004	3.997	3	2	2	2	842	93.7	8.05	2.5	2	Pf00005, Pf00664	74104	ENSMUSG00000026198	Abcb6	mmu:74104; Q3U7N5; Q3UAZ6; Q9DC29		Mitochondrial ABC transporters	1	0
High	Q61102	ATP-binding cassette sub-family B member 7, mitochondrial OS=Mus musculus OX=10090 GN=Abcb7 PE=1 SV=3	0.007	3.524	2	2	4	2	752	82.5	9.32	3.28	2	Pf00005, Pf00664	11306	ENSMUSG00000031333	Abcb7	A2AC46; mmu:11306; Q3U7S8; Q61102		Mitochondrial ABC transporters	1	0
High	Q9JJ59	ATP-binding cassette sub-family B member 9 OS=Mus musculus OX=10090 GN=Abcb9 PE=2 SV=1	0	12.584	8	4	7	4	762	83.9	7.62	14.04	4	Pf00664	56325	ENSMUSG00000029408	Abcb9	mmu:56325; Q8CHA1; Q9D212; Q9JIN1; Q9JJ59		ABC-family proteins mediated transport	1	0
High	Q61285	ATP-binding cassette sub-family D member 2 OS=Mus musculus OX=10090 GN=Abcd2 PE=1 SV=1	0	7.431	4	3	3	3	741	83.4	9.09	7.15	3		26874		Abcd2	mmu:26874; Q61285; Q8BQ63; Q8C4B6	Nuclear receptors in lipid metabolism and toxicity	ABC transporters in lipid homeostasis; Class I peroxisomal membrane protein import	3	0
High	P55096	ATP-binding cassette sub-family D member 3 OS=Mus musculus OX=10090 GN=Abcd3 PE=1 SV=2	0	39.219	20	11	20	10	659	75.4	9.26	38.19	11		19299	ENSMUSG00000028127	Abcd3	mmu:19299; P55096	Nuclear receptors in lipid metabolism and toxicity	RHOC GTPase cycle; RHOA GTPase cycle; ABC transporters in lipid homeostasis; Class I peroxisomal membrane protein import	5	0
High	P61222	ATP-binding cassette sub-family E member 1 OS=Mus musculus OX=10090 GN=Abce1 PE=1 SV=1	0	23.233	19	9	18	9	599	67.3	8.34	29.18	9	Pf00037	24015	ENSMUSG00000058355	Abce1	mmu:24015; O88793; P61222; Q13181; Q13864; Q96AL0; Q96B10; Q99K66		Interferon alpha/beta signaling; OAS antiviral response	2	0
High	Q6P542	ATP-binding cassette sub-family F member 1 OS=Mus musculus OX=10090 GN=Abcf1 PE=1 SV=1	0	23.579	5	4	8	4	837	94.9	6.51	24.14	4	Pf12848	224742	ENSMUSG00000038762	Abcf1	mmu:224742; Q6NV71; Q6P542		ABC-family proteins mediated transport	1	0
High	Q99LE6	ATP-binding cassette sub-family F member 2 OS=Mus musculus OX=10090 GN=Abcf2 PE=1 SV=1	0	8.2	5	3	3	3	628	71.7	7.05	5.75	3	Pf00005, Pf12848	27407	ENSMUSG00000028953	Abcf2	mmu:27407; Q3UA24; Q8C1S5; Q99LE6; Q9JL48			0	0
High	Q8K268	ATP-binding cassette sub-family F member 3 OS=Mus musculus OX=10090 GN=Abcf3 PE=1 SV=1	0	6.727	7	3	5	3	709	79.8	6.16	9.39	3	Pf12848	27406	ENSMUSG00000003234	Abcf3	mmu:27406; Q8K268; Q9JL49			0	0
Medium	Q9DBM0	ATP-binding cassette sub-family G member 8 OS=Mus musculus OX=10090 GN=Abcg8 PE=1 SV=1	0.037	1.941	4	2	2	2	673	75.9	7.33	0	2	Pf01061, Pf19055	67470	ENSMUSG00000024254	Abcg8	mmu:67470; Q8R543; Q9DBM0	Retinol metabolism	ABC transporters in lipid homeostasis	2	0
High	Q91V92	ATP-citrate synthase OS=Mus musculus OX=10090 GN=Acly PE=1 SV=1	0	135.311	41	40	91	40	1091	119.7	7.44	152.07	40	Pf00285, Pf02629	104112	ENSMUSG00000020917	Acly	mmu:104112; Q91V92	Fatty Acid Biosynthesis	Neutrophil degranulation; Fatty acyl-CoA biosynthesis	3	0
High	Q9CZ42	ATP-dependent (S)-NAD(P)H-hydrate dehydratase OS=Mus musculus OX=10090 GN=Naxd PE=1 SV=1	0	10.612	20	4	5	4	343	36.7	7.77	13.71	4	Pf01256	69225		Naxd	mmu:69225; Q9CQX9; Q9CZ42; Q9D7G7; Q9DC93		Nicotinamide salvaging	1	0
High	P12382	ATP-dependent 6-phosphofructokinase, liver type OS=Mus musculus OX=10090 GN=Pfkl PE=1 SV=4	0	52.724	22	15	35	10	780	85.3	7.17	60.73	15	Pf00365	18641	ENSMUSG00000020277	Pfkl	mmu:18641; P12382; Q8VDX7	Glycolysis and Gluconeogenesis; Insulin Signaling	Neutrophil degranulation; Glycolysis	4	0
High	P47857	ATP-dependent 6-phosphofructokinase, muscle type OS=Mus musculus OX=10090 GN=Pfkm PE=1 SV=3	0	73.122	34	24	51	20	780	85.2	8	89.12	24	Pf00365	18642	ENSMUSG00000033065	Pfkm	C8CMN5; C8CMN6; C8CMN7; mmu:18642; O35513; P47857; Q543L1; Q9JK94	Glycolysis and Gluconeogenesis; Insulin Signaling	Glycolysis	3	3
High	Q9WUA3	ATP-dependent 6-phosphofructokinase, platelet type OS=Mus musculus OX=10090 GN=Pfkp PE=1 SV=1	0	137.089	48	34	107	31	784	85.4	7.11	215.71	34	Pf00365	56421	ENSMUSG00000021196	Pfkp	mmu:56421; Q3TNA9; Q3U4P1; Q3U7G4; Q4KUG1; Q543K8; Q8C5I6; Q9JI86; Q9WUA3	Glycolysis and Gluconeogenesis	Glycolysis	2	3
High	O88696	ATP-dependent Clp protease proteolytic subunit, mitochondrial OS=Mus musculus OX=10090 GN=Clpp PE=1 SV=1	0	6.614	15	3	4	3	272	29.8	7.47	2.25	3	Pf00574	53895	ENSMUSG00000002660	Clpp	mmu:53895; O88696; Q3TI13			0	0
Low	Q80SX8	ATP-dependent DNA helicase PIF1 OS=Mus musculus OX=10090 GN=Pif1 PE=1 SV=2	0.069	1.545	2	1	1	1	650	70.9	9.29	0	1		208084	ENSMUSG00000041064	Pif1	mmu:208084; Q80SX8; Q80W44; Q8BIZ3; Q8BJ72		Telomere Extension By Telomerase	1	0
Low	Q9Z129	ATP-dependent DNA helicase Q1 OS=Mus musculus OX=10090 GN=Recql PE=1 SV=2	0.25	0.738	1	1	1	1	648	72.4	8.34	1.63	1	Pf00270, Pf16124	19691	ENSMUSG00000030243	Recql	mmu:19691; Q3TPI5; Q9Z128; Q9Z129			0	0
High	Q8VHK9	ATP-dependent DNA/RNA helicase DHX36 OS=Mus musculus OX=10090 GN=Dhx36 PE=1 SV=2	0	5.985	4	3	3	3	1001	113.8	8.29	4.39	3	Pf00270, Pf04408, Pf07717	72162	ENSMUSG00000027770	Dhx36	G3X8Y4; mmu:72162; Q6ZPP7; Q8VHK9; Q9CSE8		DEx/H-box helicases activate type I IFN and inflammatory cytokines production	1	0
High	O70133	ATP-dependent RNA helicase A OS=Mus musculus OX=10090 GN=Dhx9 PE=1 SV=2	0	71.145	16	24	42	24	1380	149.4	6.83	90.07	24	Pf00270, Pf00271, Pf04408, Pf07717	13211		Dhx9	mmu:13211; O35931; O54703; O70133; Q5FWY1; Q6R5F7; Q9CSA2	PluriNetWork: mechanisms associated with pluripotency; mRNA processing	mRNA Splicing - Major Pathway; RIP-mediated NFkB activation via ZBP1; DEx/H-box helicases activate type I IFN and inflammatory cytokines production	5	0
High	Q91VR5	ATP-dependent RNA helicase DDX1 OS=Mus musculus OX=10090 GN=Ddx1 PE=1 SV=1	0	34.045	21	14	19	14	740	82.4	7.21	31.6	14	Pf00270	104721	ENSMUSG00000037149	Ddx1	mmu:104721; Q3TU41; Q91VR5	mRNA processing		1	0
High	Q61655	ATP-dependent RNA helicase DDX19A OS=Mus musculus OX=10090 GN=Ddx19a PE=1 SV=2	0	13.137	7	4	9	4	478	53.9	6.67	14.8	4	Pf00270	13680	ENSMUSG00000015023	Ddx19a	mmu:13680; Q543M2; Q61655; Q921R0	mRNA processing		1	0
High	Q8VDW0	ATP-dependent RNA helicase DDX39A OS=Mus musculus OX=10090 GN=Ddx39a PE=1 SV=1	0	8.822	10	5	8	1	427	49	5.68	8.34	5	Pf00270	68278	ENSMUSG00000005481	Ddx39a	mmu:68278; Q3UJV4; Q8C2C2; Q8VDW0	mRNA processing	Transport of Mature mRNA derived from an Intron-Containing Transcript; mRNA 3'-end processing; RNA Polymerase II Transcription Termination	4	0
High	Q62167	ATP-dependent RNA helicase DDX3X OS=Mus musculus OX=10090 GN=Ddx3x PE=1 SV=3	0	57.422	29	18	32	3	662	73.1	7.18	55.46	18	Pf00270	13205	ENSMUSG00000000787	Ddx3x	mmu:13205; O09060; O09143; Q62167	TNF-alpha NF-kB Signaling Pathway; mRNA processing	Neutrophil degranulation	3	12
High	Q62095	ATP-dependent RNA helicase DDX3Y OS=Mus musculus OX=10090 GN=Ddx3y PE=1 SV=2	0	52.389	29	17	30	2	658	73.4	7.53	50.45	17	Pf00270	26900	ENSMUSG00000069045	Ddx3y	mmu:26900; Q62095; Q9QWS9			0	0
High	Q61496	ATP-dependent RNA helicase DDX4 OS=Mus musculus OX=10090 GN=Ddx4 PE=1 SV=2	0	7.85	5	3	9	1	702	76.4	6.09	14.87	3	Pf00270, Pf00271	13206	ENSMUSG00000021758	Ddx4	mmu:13206; Q61496; Q9D5X7	mRNA processing	RND3 GTPase cycle	2	0
High	Q810A7	ATP-dependent RNA helicase DDX42 OS=Mus musculus OX=10090 GN=Ddx42 PE=1 SV=3	0	25.745	13	9	13	9	929	101.9	6.98	21.5	9	Pf00270, Pf00271	72047	ENSMUSG00000020705	Ddx42	mmu:72047; Q3TAN3; Q3TE60; Q810A7; Q8BWZ7; Q9D8Q2		mRNA Splicing - Major Pathway; mRNA Splicing - Minor Pathway	2	0
High	Q99MJ9	ATP-dependent RNA helicase DDX50 OS=Mus musculus OX=10090 GN=Ddx50 PE=2 SV=1	0.004	4.029	2	1	1	1	734	82.1	9.25	2.84	1	Pf00270, Pf08152	94213	ENSMUSG00000020076	Ddx50	mmu:94213; Q99MJ9			0	0
High	Q6PGC1	ATP-dependent RNA helicase DHX29 OS=Mus musculus OX=10090 GN=Dhx29 PE=1 SV=1	0	13.007	5	6	9	5	1365	153.9	7.94	14.59	6	Pf00271, Pf04408, Pf07717	218629	ENSMUSG00000042426	Dhx29	mmu:218629; Q6PGC1; Q8BQJ4; Q8BT01; Q8C9B7; Q8C9H9			0	0
Medium	Q99PU8	ATP-dependent RNA helicase DHX30 OS=Mus musculus OX=10090 GN=Dhx30 PE=1 SV=1	0.016	2.452	3	2	2	2	1217	136.6	8.75	0	2	Pf00270, Pf00271, Pf04408, Pf07717	72831	ENSMUSG00000032480	Dhx30	mmu:72831; Q3U4Z4; Q3UFA0; Q3UJS4; Q91WA7; Q99KN7; Q99PU8			0	0
Low	A2A4P0	ATP-dependent RNA helicase DHX8 OS=Mus musculus OX=10090 GN=Dhx8 PE=2 SV=1	0.254	0.724	1	1	1	1	1244	142.5	8.12	0	1	Pf00271, Pf00575, Pf04408, Pf07717	217207	ENSMUSG00000034931	Dhx8	A2A4P0; mmu:217207	mRNA processing		1	0
Medium	P21447	ATP-dependent translocase ABCB1 OS=Mus musculus OX=10090 GN=Abcb1a PE=1 SV=3	0.029	2.107	3	2	2	2	1276	140.6	8.85	2.06	2	Pf00005	18671	ENSMUSG00000040584	Abcb1a	mmu:18671; P21447; Q5I1Y5	Nuclear receptors in lipid metabolism and toxicity	ABC-family proteins mediated transport	2	0
Low	Q9JM63	ATP-sensitive inward rectifier potassium channel 10 OS=Mus musculus OX=10090 GN=Kcnj10 PE=1 SV=1	0.184	0.897	2	1	1	1	379	42.4	8.29	1.63	1	Pf01007, Pf17655	16513	ENSMUSG00000044708	Kcnj10	mmu:16513; Q9JM63		Activation of G protein gated Potassium channels; Inhibition of voltage gated Ca2+ channels via Gbeta/gamma subunits; Potassium transport channels	3	0
High	O54984	ATPase Asna1 OS=Mus musculus OX=10090 GN=Asna1 PE=1 SV=2	0.009	3.011	2	1	2	1	348	38.8	4.91	3.55	1	Pf02374	56495	ENSMUSG00000052456	Get3	mmu:56495; O54984; Q3TAQ4			0	0
High	Q9D5T0	ATPase family AAA domain-containing protein 1 OS=Mus musculus OX=10090 GN=Atad1 PE=1 SV=1	0	23.261	17	5	7	5	361	40.7	6.9	21.22	5	Pf00004	67979	ENSMUSG00000013662	Atad1	mmu:67979; Q3U8V2; Q9D5T0; Q9D7A4		Class I peroxisomal membrane protein import	1	0
Low	Q8CDM1	ATPase family AAA domain-containing protein 2 OS=Mus musculus OX=10090 GN=Atad2 PE=1 SV=1	0.252	0.731	1	1	1	1	1040	117.9	6.89	0	1	Pf00004, Pf00439	70472	ENSMUSG00000022360; ENSMUSG00000116053	Atad2	mmu:70472; Q3UYW6; Q8CDM1		TFAP2 (AP-2) family regulates transcription of growth factors and their receptors	1	0
High	Q925I1	ATPase family AAA domain-containing protein 3 OS=Mus musculus OX=10090 GN=Atad3 PE=1 SV=1	0	29.013	20	10	18	10	591	66.7	9.29	32.93	10	Pf00004, Pf12037	108888	ENSMUSG00000029036	Atad3	A2AD89; mmu:108888; Q3TA78; Q3UE74; Q69ZM7; Q8C6C6; Q925I1		Neutrophil degranulation	1	0
Low	Q4QY64	ATPase family AAA domain-containing protein 5 OS=Mus musculus OX=10090 GN=Atad5 PE=1 SV=1	0.192	0.878	0	1	1	1	1826	203.8	8.9	1.79	1	Pf00004	237877	ENSMUSG00000017550	Atad5	mmu:237877; Q3TMG5; Q3UW85; Q3V306; Q3V3T9; Q4QY64; Q5SSK4; Q8BUH4; Q8CGG7			0	0
High	O35143	ATPase inhibitor, mitochondrial OS=Mus musculus OX=10090 GN=ATP5IF1 PE=1 SV=2	0.002	4.807	8	1	3	1	106	12.2	9.64	2.14	1	Pf04568	11983	ENSMUSG00000054428	Atp5if1	mmu:11983; O35143; Q9D879	Electron Transport Chain		1	0
High	Q91XU0	ATPase WRNIP1 OS=Mus musculus OX=10090 GN=Wrnip1 PE=1 SV=2	0.009	3.382	3	2	2	2	660	71.7	6.18	3.98	2	Pf00004, Pf12002, Pf18279	78903	ENSMUSG00000021400	Wrnip1	mmu:78903; Q3TCT7; Q6PDF0; Q8BUW5; Q8BWP6; Q8BY55; Q91XU0; Q921W3; Q9EQL3			0	0
Low	Q8BMG1	ATR-interacting protein OS=Mus musculus OX=10090 GN=Atrip PE=1 SV=2	0.091	1.332	1	1	1	1	785	85.5	6.25	0	1		235610	ENSMUSG00000025646	Atrip	E9QLS8; mmu:235610; Q8BMG1		Regulation of TP53 Activity through Phosphorylation; Activation of ATR in response to replication stress; Processing of DNA double-strand break ends; G2/M DNA damage checkpoint; Fanconi Anemia Pathway; HDR through Single Strand Annealing (SSA); Presynaptic phase of homologous DNA pairing and strand exchange	7	0
Low	P18293	Atrial natriuretic peptide receptor 1 OS=Mus musculus OX=10090 GN=Npr1 PE=1 SV=2	0.091	1.335	1	1	1	1	1057	119	6.89	2.01	1	Pf00211, Pf01094	18160	ENSMUSG00000027931	Npr1	mmu:18160; P18293	PluriNetWork: mechanisms associated with pluripotency; Purine metabolism	Physiological factors	3	0
Low	Q9Z319	Atrial natriuretic peptide-converting enzyme OS=Mus musculus OX=10090 GN=Corin PE=2 SV=2	0.219	0.806	1	1	1	1	1113	122.9	5.39	1.8	1	Pf00089, Pf01392	53419	ENSMUSG00000005220	Corin	B2RRC6; mmu:53419; Q566K6; Q9Z319	Myometrial Relaxation and Contraction Pathways	Physiological factors	2	0
Low	Q9WU60	Attractin OS=Mus musculus OX=10090 GN=Atrn PE=1 SV=3	0.206	0.836	1	1	1	1	1428	158	7.27	0	1	Pf00431, Pf01437, Pf13964	11990	ENSMUSG00000027312	Atrn	A2AP43; mmu:11990; Q9R263; Q9WU60; Q9WU77			0	0
Low	Q9QUI6	Atypical chemokine receptor 1 OS=Mus musculus OX=10090 GN=Ackr1 PE=2 SV=2	0.134	1.075	6	1	2	1	334	36.7	7.56	0	1		13349		Ackr1	mmu:13349; O35970; Q91VB6; Q920X0; Q920X1; Q920X2; Q920X3; Q9QUI6	GPCRs, Other		1	0
Low	Q9Z0E3	Autoimmune regulator OS=Mus musculus OX=10090 GN=Aire PE=1 SV=1	0.254	0.725	2	1	1	1	552	59	8.07	0	1	Pf03172	11634	ENSMUSG00000000731	Aire	mmu:11634; Q9JLW0; Q9JLW1; Q9JLW2; Q9JLW3; Q9JLW4; Q9JLW5; Q9JLW6; Q9JLW7; Q9JLW8; Q9JLW9; Q9JLX0; Q9Z0E3			0	0
Low	Q99J83	Autophagy protein 5 OS=Mus musculus OX=10090 GN=Atg5 PE=1 SV=1	0.113	1.193	4	1	1	1	275	32.4	5.91	0	1	Pf04106	11793	ENSMUSG00000038160	Atg5	mmu:11793; Q99J83		Macroautophagy; PINK1-PRKN Mediated Mitophagy; Receptor Mediated Mitophagy	3	0
Medium	Q91YI1	Autophagy-related protein 13 OS=Mus musculus OX=10090 GN=Atg13 PE=1 SV=2	0.038	1.933	2	1	2	1	516	56.4	5.26	3.62	1	Pf10033	51897	ENSMUSG00000027244	Atg13	A2AH18; mmu:51897; Q80TU9; Q91YI1		Macroautophagy	1	0
High	Q6P4T0	Autophagy-related protein 2 homolog A OS=Mus musculus OX=10090 GN=Atg2a PE=1 SV=2	0	11.79	3	4	8	4	1914	210.8	6.06	17.48	4	Pf09333	329015	ENSMUSG00000024773; ENSMUSG00000106907	Atg2a	mmu:329015; Q3U9I1; Q6P4T0; Q6PHN0; Q6ZQC4; Q8R213			0	0
High	Q80XK6	Autophagy-related protein 2 homolog B OS=Mus musculus OX=10090 GN=Atg2b PE=1 SV=3	0	76.465	12	21	43	21	2075	231.3	5.88	95.04	21	Pf09333	76559	ENSMUSG00000041341	Atg2b	A0PJL7; mmu:76559; Q80XK6; Q8BIQ4; Q8BIV0; Q8R1H5; Q9CWK6			0	0
Low	Q8C4Q6	Axin interactor, dorsalization-associated protein OS=Mus musculus OX=10090 GN=Aida PE=1 SV=1	0.163	0.961	2	1	1	1	305	34.9	6.74	2.14	1	Pf08910	108909	ENSMUSG00000042901	Aida	mmu:108909; Q3U6V0; Q3UP85; Q6NXY2; Q6PG77; Q78W09; Q8C4Q6; Q99K80			0	0
Low	O88566	Axin-2 OS=Mus musculus OX=10090 GN=Axin2 PE=1 SV=2	0.081	1.418	2	1	1	1	840	92.8	7.75	2.01	1	Pf00615, Pf08833	12006	ENSMUSG00000000142	Axin2	mmu:12006; O88566; Q6PFZ9; Q9QXJ6	Neural Crest Differentiation; Wnt Signaling Pathway NetPath; Wnt Signaling Pathway and Pluripotency	Degradation of AXIN; Ub-specific processing proteases	6	0
Low	Q3UZ57	Axonemal dynein light chain domain-containing protein 1 OS=Mus musculus OX=10090 GN=Axdnd1 PE=1 SV=1	0.217	0.814	4	1	1	1	424	49.8	5.26	0	1				Axdnd1	Q3UZ57			0	0
Low	Q9D219	B-cell CLL/lymphoma 9 protein OS=Mus musculus OX=10090 GN=Bcl9 PE=1 SV=3	0.22	0.803	1	1	1	1	1425	148.9	8.91	0	1		77578	ENSMUSG00000038256	Bcl9	B2RQC0; mmu:77578; Q67FX9; Q8BUJ8; Q8VE74; Q9D219	Wnt Signaling Pathway NetPath	Formation of the beta-catenin:TCF transactivating complex	2	0
Medium	Q9Z0H7	B-cell lymphoma/leukemia 10 OS=Mus musculus OX=10090 GN=Bcl10 PE=1 SV=1	0.014	2.536	5	1	1	1	233	25.9	6.55	2.4	1	Pf00619	12042	ENSMUSG00000028191	Bcl10	mmu:12042; Q3UBN4; Q9Z0H7		Downstream TCR signaling; FCERI mediated NF-kB activation; CLEC7A (Dectin-1) signaling; Activation of NF-kappaB in B cells; E3 ubiquitin ligases ubiquitinate target proteins	5	0
High	Q9QYE3	B-cell lymphoma/leukemia 11A OS=Mus musculus OX=10090 GN=Bcl11a PE=1 SV=1	0.009	3.101	2	1	2	1	773	83.8	6.28	4.83	1	Pf00096	14025	ENSMUSG00000000861	Bcl11a	mmu:14025; Q80T89; Q8BLC7; Q8BLR4; Q8BWX3; Q921V4; Q9D0V2; Q9JIT4; Q9JLK8; Q9JLK9; Q9QYE3			0	0
Medium	Q99PV8	B-cell lymphoma/leukemia 11B OS=Mus musculus OX=10090 GN=Bcl11b PE=1 SV=1	0.018	2.328	1	2	3	2	884	94.5	6.62	1.64	2	Pf00096	58208	ENSMUSG00000048251	Bcl11b	mmu:58208; Q8C2I1; Q99PV6; Q99PV7; Q99PV8; Q9JLF8			0	0
High	Q61335	B-cell receptor-associated protein 31 OS=Mus musculus OX=10090 GN=Bcap31 PE=1 SV=4	0	29.31	20	8	16	7	245	27.9	8.7	32.78	8	Pf05529, Pf18035	27061	ENSMUSG00000002015	Bcap31	A2ALM8; mmu:27061; Q61335; Q9D0E9; Q9D8G7		RHOA GTPase cycle; Antigen Presentation: Folding, assembly and peptide loading of class I MHC; Apoptotic cleavage of cellular proteins	4	0
Medium	Q3UK10	B9 domain-containing protein 2 OS=Mus musculus OX=10090 GN=B9d2 PE=1 SV=2	0.028	2.116	13	1	1	1	175	19.2	7.58	2.29	1		232987	ENSMUSG00000063439	B9d2	mmu:232987; Q3UK10; Q8R045		Separation of Sister Chromatids; Anchoring of the basal body to the plasma membrane; Amplification of signal from unattached kinetochores via a MAD2 inhibitory signal; Resolution of Sister Chromatid Cohesion; RHO GTPases Activate Formins; EML4 and NUDC in mitotic spindle formation	7	0
Medium	Q62210	Baculoviral IAP repeat-containing protein 2 OS=Mus musculus OX=10090 GN=Birc2 PE=1 SV=1	0.033	2.018	3	1	1	1	612	69.6	6.54	2.02	1	Pf00619, Pf00653, Pf13920	11797	ENSMUSG00000057367	Birc2	A6H6S7; mmu:11797; O08864; Q62210	Apoptosis; TNF-alpha NF-kB Signaling Pathway; Focal Adhesion	Regulation of necroptotic cell death; Ub-specific processing proteases; Apoptotic cleavage of cellular proteins; NOD1/2 Signaling Pathway; IKK complex recruitment mediated by RIP1; Regulation of TNFR1 signaling; TNFR1-induced NFkappaB signaling pathway; TNF receptor superfamily (TNFSF) members mediating non-canonical NF-kB pathway	12	0
High	O88738	Baculoviral IAP repeat-containing protein 6 OS=Mus musculus OX=10090 GN=Birc6 PE=1 SV=2	0	93.39	9	32	52	32	4882	531.8	6.07	80.23	32	Pf00653, Pf12356	12211	ENSMUSG00000024073	Birc6	E9PYU6; mmu:12211; O88738; Q69ZM5; Q8BNX0; Q8BR72; Q8BRV7; Q8C737			0	0
Low	Q60739	BAG family molecular chaperone regulator 1 OS=Mus musculus OX=10090 GN=Bag1 PE=1 SV=3	0.068	1.555	3	1	2	1	355	39.7	8.46	1.73	1	Pf00240	12017	ENSMUSG00000028416	Bag1	mmu:12017; Q561N1; Q60739; Q6IS45; Q9D7K6		Regulation of HSF1-mediated heat shock response	1	0
High	Q8CI61	BAG family molecular chaperone regulator 4 OS=Mus musculus OX=10090 GN=Bag4 PE=1 SV=2	0	21.471	10	3	8	3	457	49.1	5.34	22.14	3		67384	ENSMUSG00000037316	Bag4	mmu:67384; Q3TRL9; Q8CI61; Q91VT5; Q9CWG2	Oxidative Damage; TNF-alpha NF-kB Signaling Pathway	Regulation of HSF1-mediated heat shock response; TNF signaling	4	0
High	Q8CI32	BAG family molecular chaperone regulator 5 OS=Mus musculus OX=10090 GN=Bag5 PE=1 SV=1	0	23.719	13	5	8	5	447	50.9	6.05	26.34	5		70369	ENSMUSG00000049792	Bag5	mmu:70369; Q3TVA8; Q8CI32; Q8K175; Q9DAU0		Regulation of HSF1-mediated heat shock response	1	0
Low	Q3UHR0	BAH and coiled-coil domain-containing protein 1 OS=Mus musculus OX=10090 GN=Bahcc1 PE=2 SV=2	0.182	0.9	1	1	1	1	2643	282.3	9.03	0	1		268515	ENSMUSG00000039741	Bahcc1	A2AS78; mmu:268515; Q0KK52; Q0KK57; Q3TPP4; Q3UHG9; Q3UHR0; Q6GQV4; Q6P9S8; Q6PFC9; Q80UX2			0	0
High	Q9Z2H5	Band 4.1-like protein 1 OS=Mus musculus OX=10090 GN=Epb41l1 PE=1 SV=2	0	136.407	50	42	110	39	879	98.3	5.62	195	42	Pf00373, Pf04382, Pf08736, Pf09379	13821		Epb41l1	mmu:13821; Q3U3L1; Q3UHP7; Q80U34; Q8K204; Q9Z2H5	Splicing factor NOVA regulated synaptic proteins	Neurexins and neuroligins; Trafficking of AMPA receptors	3	1
High	O70318	Band 4.1-like protein 2 OS=Mus musculus OX=10090 GN=Epb41l2 PE=1 SV=2	0	87.87	32	28	45	23	988	109.9	5.43	77.23	28	Pf00373, Pf04382, Pf08736, Pf09379	13822	ENSMUSG00000019978	Epb41l2	G3X9B8; mmu:13822; O70318	Splicing factor NOVA regulated synaptic proteins	Neurexins and neuroligins	2	0
High	Q9WV92	Band 4.1-like protein 3 OS=Mus musculus OX=10090 GN=Epb41l3 PE=1 SV=1	0	198.332	57	51	118	45	929	103.3	5.31	269.39	51	Pf00373, Pf04382, Pf08736, Pf09379	13823	ENSMUSG00000024044	Epb41l3	mmu:13823; Q69ZT8; Q9R102; Q9WV92	Splicing factor NOVA regulated synaptic proteins	Neurexins and neuroligins	2	5
Low	Q8BGS1	Band 4.1-like protein 5 OS=Mus musculus OX=10090 GN=Epb41l5 PE=1 SV=1	0.257	0.72	1	1	1	1	731	81.6	6.39	0	1	Pf00373, Pf08736, Pf09379	226352	ENSMUSG00000026383	Epb41l5	mmu:226352; Q3TJG0; Q69ZG8; Q8BGS1; Q8BSC9; Q99KZ8		Neurexins and neuroligins	1	0
High	Q8K2G4	Bardet-Biedl syndrome 7 protein homolog OS=Mus musculus OX=10090 GN=Bbs7 PE=1 SV=1	0.001	5.623	3	2	2	2	715	80.3	5.81	2.33	2		71492	ENSMUSG00000037325	Bbs7	mmu:71492; Q8C7G3; Q8CH00; Q8K2G4; Q9CXC2		BBSome-mediated cargo-targeting to cilium	1	0
High	O54962	Barrier-to-autointegration factor OS=Mus musculus OX=10090 GN=Banf1 PE=1 SV=1	0.003	4.324	17	2	4	2	89	10.1	6.09	7.03	2	Pf02961	23825	ENSMUSG00000024844	Banf1	mmu:23825; O54962; Q542E6			0	0
Low	Q9R069	Basal cell adhesion molecule OS=Mus musculus OX=10090 GN=Bcam PE=1 SV=1	0.11	1.206	2	1	1	1	622	67.6	6.25	2.1	1	Pf08205, Pf13895, Pf13927	57278	ENSMUSG00000002980	Bcam	mmu:57278; Q9ESS5; Q9JKB2; Q9R069	PluriNetWork: mechanisms associated with pluripotency		1	0
High	Q05793	Basement membrane-specific heparan sulfate proteoglycan core protein OS=Mus musculus OX=10090 GN=Hspg2 PE=1 SV=1	0.001	5.413	1	3	4	3	3707	398	6.32	1.76	3	Pf00008, Pf00052, Pf00053, Pf00054, Pf13927	15530		Hspg2	mmu:15530; Q05793		Retinoid metabolism and transport; Degradation of the extracellular matrix; Laminin interactions; ECM proteoglycans; Integrin cell surface interactions; Non-integrin membrane-ECM interactions; HS-GAG degradation; A tetrasaccharide linker sequence is required for GAG synthesis; HS-GAG biosynthesis	9	0
Medium	Q9CQC6	Basic leucine zipper and W2 domain-containing protein 1 OS=Mus musculus OX=10090 GN=Bzw1 PE=1 SV=1	0.01	2.858	2	1	1	1	419	48	5.92	1.91	1		66882	ENSMUSG00000051223	Bzw1	mmu:66882; Q3THS5; Q3UZ94; Q9CQC6			0	0
High	Q91VK1	Basic leucine zipper and W2 domain-containing protein 2 OS=Mus musculus OX=10090 GN=Bzw2 PE=1 SV=1	0.009	3.086	5	1	1	1	419	48	6.68	2.89	1		66912	ENSMUSG00000020547	Bzw2	mmu:66912; Q91VK1; Q9D0N4			0	0
High	P18572	Basigin OS=Mus musculus OX=10090 GN=Bsg PE=1 SV=2	0	31.399	17	8	22	8	389	42.4	5.85	50.84	8	Pf13927	12215	ENSMUSG00000023175	Bsg	mmu:12215; P18572; Q6LDB0; Q7TSC0	Matrix Metalloproteinases	Integrin cell surface interactions; Degradation of the extracellular matrix; Pyruvate metabolism; Basigin interactions; Proton-coupled monocarboxylate transport	6	0
High	O08734	Bcl-2 homologous antagonist/killer OS=Mus musculus OX=10090 GN=Bak1 PE=1 SV=3	0	7.951	11	1	2	1	209	23.3	6.18	7.88	1	Pf00452	12018	ENSMUSG00000057789	Bak1	E9QM21; mmu:12018; O08734; Q8C264	Apoptosis; Oxidative Damage	Activation and oligomerization of BAK protein; Release of apoptotic factors from the mitochondria; Pyroptosis	5	0
High	Q8K019	Bcl-2-associated transcription factor 1 OS=Mus musculus OX=10090 GN=Bclaf1 PE=1 SV=2	0	11.432	7	6	6	5	919	105.9	9.99	4.41	6	Pf15440	72567	ENSMUSG00000037608	Bclaf1	mmu:72567; Q8BNZ0; Q8C2E9; Q8K019; Q9CSW5	mRNA processing		1	0
High	P59017	Bcl-2-like protein 13 OS=Mus musculus OX=10090 GN=Bcl2l13 PE=1 SV=2	0	7.526	5	2	5	2	434	46.7	4.59	12.15	2	Pf00452	94044	ENSMUSG00000009112	Bcl2l13	mmu:94044; P59017; Q543S1			0	0
Low	P70345	Bcl-2-like protein 2 OS=Mus musculus OX=10090 GN=Bcl2l2 PE=1 SV=1	0.116	1.174	5	1	1	1	193	20.8	5.58	2.11	1	Pf00452	12050	ENSMUSG00000089682	Bcl2l2	mmu:12050; P70345; Q545Q4; Q6A093; Q8CFR2; Q8CGL4; Q9CYW5	Apoptosis		1	0
High	O55003	BCL2/adenovirus E1B 19 kDa protein-interacting protein 3 OS=Mus musculus OX=10090 GN=Bnip3 PE=1 SV=1	0.004	4.164	11	2	2	2	187	21	7.14	3.88	2		12176	ENSMUSG00000078566	Bnip3	mmu:12176; O55003; Q544Y4			0	0
Low	A2AG58	BCLAF1 and THRAP3 family member 3 OS=Mus musculus OX=10090 GN=Bclaf3 PE=1 SV=1	0.174	0.93	1	1	1	1	752	90.1	9.58	0	1	Pf15440	382252	ENSMUSG00000044150	Bclaf3	A2AG56; A2AG57; A2AG58; mmu:382252; Q3UM32; Q8BRL2			0	0
High	P15209	BDNF/NT-3 growth factors receptor OS=Mus musculus OX=10090 GN=Ntrk2 PE=1 SV=1	0	16.735	8	6	10	4	821	92.1	6.55	24.69	6	Pf13855	18212	ENSMUSG00000055254	Ntrk2	mmu:18212; P15209; Q3TUF9; Q80WU0; Q91XJ9		Activated NTRK2 signals through PLCG1; Activated NTRK2 signals through FRS2 and FRS3; NTRK2 activates RAC1	3	2
Low	Q8CDJ3	Beclin 1-associated autophagy-related key regulator OS=Mus musculus OX=10090 GN=Atg14 PE=1 SV=1	0.257	0.72	1	1	4	1	492	55.4	7.81	0	1	Pf10186	100504663	ENSMUSG00000037526	Atg14	mmu:100504663; Q69ZY1; Q6PFY6; Q8C6N0; Q8CDJ3; Q8R3M3		Macroautophagy	1	0
High	O88597	Beclin-1 OS=Mus musculus OX=10090 GN=Becn1 PE=1 SV=3	0	6.57	6	3	4	3	448	51.6	4.93	9.28	3	Pf04111, Pf15285	56208	ENSMUSG00000035086	Becn1	mmu:56208; O88597; Q99J03		Ub-specific processing proteases; Macroautophagy	2	0
Low	Q8C6D4	BEN domain-containing protein 5 OS=Mus musculus OX=10090 GN=Bend5 PE=2 SV=1	0.074	1.475	2	1	1	1	421	48.2	6.07	0	1		67621	ENSMUSG00000028545	Bend5	mmu:67621; Q3TJI2; Q80V74; Q80WB6; Q8C6D4; Q9CRW0			0	0
Medium	Q6H1V1	Bestrophin-3 OS=Mus musculus OX=10090 GN=Best3 PE=2 SV=1	0.029	2.091	1	1	3	1	669	76.4	7.18	5.61	1	Pf01062	382427	ENSMUSG00000020169	Best3	mmu:382427; Q6H1V1		Stimuli-sensing channels	1	0
Low	Q5JCT0	Beta-1,3-galactosyl-O-glycosyl-glycoprotein beta-1,6-N-acetylglucosaminyltransferase 3 OS=Mus musculus OX=10090 GN=Gcnt3 PE=2 SV=2	0.052	1.714	6	2	3	2	437	50.7	8.25	4.05	2	Pf02485	72077	ENSMUSG00000032226	Gcnt3	A2TIK7; mmu:72077; Q5JCT0; Q8VCX9; Q9D8A3		O-linked glycosylation of mucins	1	0
Low	Q6L8S8	Beta-1,4-N-acetylgalactosaminyltransferase 3 OS=Mus musculus OX=10090 GN=B4galnt3 PE=2 SV=1	0.215	0.817	2	1	1	1	986	113.4	7.85	0	1	Pf05679	330406	ENSMUSG00000041372	B4galnt3	mmu:330406; Q6L8S8			0	0
Low	P18762	Beta-2 adrenergic receptor OS=Mus musculus OX=10090 GN=Adrb2 PE=1 SV=2	0.069	1.554	1	1	1	1	418	47	7.33	2.01	1	Pf00001	11555	ENSMUSG00000045730	Adrb2	mmu:11555; P18762; Q8BH38	Non-odorant GPCRs; GPCRs, Class A Rhodopsin-like; GPCRs, Other; Calcium Regulation in the Cardiac Cell; Monoamine GPCRs	Ub-specific processing proteases; Cargo recognition for clathrin-mediated endocytosis; G alpha (s) signalling events; Adrenoceptors	10	0
Low	P01887	Beta-2-microglobulin OS=Mus musculus OX=10090 GN=B2m PE=1 SV=2	0.051	1.74	7	1	2	1	119	13.8	8.44	4.38	1	Pf07654	12010	ENSMUSG00000060802	B2m	mmu:12010; P01887; Q91XJ8		Neutrophil degranulation; Immunoregulatory interactions between a Lymphoid and a non-Lymphoid cell; ER-Phagosome pathway; Endosomal/Vacuolar pathway; Antigen Presentation: Folding, assembly and peptide loading of class I MHC; DAP12 signaling	7	0
Low	Q61235	Beta-2-syntrophin OS=Mus musculus OX=10090 GN=Sntb2 PE=1 SV=2	0.251	0.734	1	1	1	1	520	56.3	8.69	0	1	Pf00595	20650	ENSMUSG00000041308	Sntb2	mmu:20650; Q61235			0	0
High	Q8BFZ3	Beta-actin-like protein 2 OS=Mus musculus OX=10090 GN=Actbl2 PE=1 SV=1	0	63.24	30	12	135	1	376	42	5.49	347.71	12	Pf00022	238880	ENSMUSG00000055194	Actbl2	mmu:238880; Q8BFZ3			0	0
High	Q9QYB8	Beta-adducin OS=Mus musculus OX=10090 GN=Add2 PE=1 SV=4	0	94.829	48	29	82	28	725	80.6	6.21	155.28	29		11519	ENSMUSG00000030000	Add2	mmu:11519; Q3U0E1; Q80VH9; Q8C1C4; Q9CXE3; Q9JLE4; Q9JLE5; Q9QYB7; Q9QYB8		Miscellaneous transport and binding events	1	1
High	Q99MK8	Beta-adrenergic receptor kinase 1 OS=Mus musculus OX=10090 GN=Grk2 PE=1 SV=2	0	9.075	5	3	9	1	689	79.6	7.28	19.4	3	Pf00615	110355	ENSMUSG00000024858	Grk2	mmu:110355; Q99LL8; Q99MK8	Chemokine signaling pathway	G alpha (q) signalling events; Cargo recognition for clathrin-mediated endocytosis; G alpha (s) signalling events; Calmodulin induced events; Activation of SMO	6	0
High	Q3UYH7	Beta-adrenergic receptor kinase 2 OS=Mus musculus OX=10090 GN=Adrbk2 PE=1 SV=2	0	8.285	6	4	8	2	688	79.6	7.69	12.52	4	Pf00615	320129	ENSMUSG00000042249	Adrbk2	F8VPM8; mmu:320129; Q3UYH7		Cargo recognition for clathrin-mediated endocytosis; G alpha (s) signalling events	2	2
High	Q8BWG8	Beta-arrestin-1 OS=Mus musculus OX=10090 GN=Arrb1 PE=1 SV=1	0	18.674	22	7	11	6	418	46.9	6.28	24.42	7	Pf00339, Pf02752	109689	ENSMUSG00000018909	Arrb1	mmu:109689; Q3UH95; Q8BTJ5; Q8BWG8	Chemokine signaling pathway; Myometrial Relaxation and Contraction Pathways; MAPK signaling pathway; Wnt Signaling Pathway NetPath; Calcium Regulation in the Cardiac Cell	G alpha (s) signalling events; Ub-specific processing proteases; Cargo recognition for clathrin-mediated endocytosis; MAP2K and MAPK activation; Thrombin signalling through proteinase activated receptors (PARs); Golgi Associated Vesicle Biogenesis; Lysosome Vesicle Biogenesis; Activation of SMO	14	1
High	Q91YI4	Beta-arrestin-2 OS=Mus musculus OX=10090 GN=Arrb2 PE=1 SV=1	0.003	4.634	5	2	2	1	410	46.3	7.66	4.48	2	Pf00339, Pf02752	216869	ENSMUSG00000060216	Arrb2	mmu:216869; Q3TCM2; Q5F2D8; Q5F2E0; Q91YI4	Chemokine signaling pathway; Myometrial Relaxation and Contraction Pathways; MAPK signaling pathway; Wnt Signaling Pathway NetPath; Calcium Regulation in the Cardiac Cell	Ub-specific processing proteases; Cargo recognition for clathrin-mediated endocytosis; G alpha (s) signalling events; Thrombin signalling through proteinase activated receptors (PARs); MAP2K and MAPK activation; WNT5A-dependent internalization of FZD4; Activation of SMO	13	0
High	Q8R5C5	Beta-centractin OS=Mus musculus OX=10090 GN=Actr1b PE=1 SV=1	0	25.518	24	7	16	2	376	42.3	6.4	38.25	7	Pf00022	226977	ENSMUSG00000037351	Actr1b	mmu:226977; Q8R5C5		MHC class II antigen presentation; Neutrophil degranulation	2	0
Low	Q9JJV0	Beta-crystallin A4 OS=Mus musculus OX=10090 GN=Cryba4 PE=2 SV=3	0.18	0.907	7	1	1	1	196	22.5	6.37	0	1		12959	ENSMUSG00000066975	Cryba4	mmu:12959; Q9JJV0			0	0
Low	P23780	Beta-galactosidase OS=Mus musculus OX=10090 GN=Glb1 PE=1 SV=1	0.234	0.775	3	1	1	1	647	73.1	7.47	0	1	Pf13364	12091	ENSMUSG00000045594	Glb1	mmu:12091; P23780		Neutrophil degranulation; HS-GAG degradation; Keratan sulfate degradation; Glycosphingolipid metabolism; Sialic acid metabolism	5	0
High	P20060	Beta-hexosaminidase subunit beta OS=Mus musculus OX=10090 GN=Hexb PE=1 SV=2	0.009	3.378	3	1	2	1	536	61.1	8.12	5.21	1	Pf00728	15212	ENSMUSG00000021665	Hexb	mmu:15212; P20060		Neutrophil degranulation; Keratan sulfate degradation; Hyaluronan uptake and degradation; Glycosphingolipid metabolism; CS/DS degradation	5	0
High	P28663	Beta-soluble NSF attachment protein OS=Mus musculus OX=10090 GN=Napb PE=1 SV=2	0	79.955	69	18	46	16	298	33.5	5.47	91.04	18		17957	ENSMUSG00000027438	Napb	mmu:17957; P28663		Intra-Golgi traffic; COPI-dependent Golgi-to-ER retrograde traffic; COPI-mediated anterograde transport; COPII-mediated vesicle transport; Retrograde transport at the Trans-Golgi-Network	5	2
High	Q91ZZ3	Beta-synuclein OS=Mus musculus OX=10090 GN=Sncb PE=1 SV=1	0	51.504	57	9	41	3	133	14	4.37	64.57	9		104069	ENSMUSG00000034891	Sncb	mmu:104069; Q91ZZ3			0	3
High	P70444	BH3-interacting domain death agonist OS=Mus musculus OX=10090 GN=Bid PE=1 SV=2	0	6.834	9	1	2	1	195	21.9	4.81	8.19	1	Pf06393	12122	ENSMUSG00000004446	Bid	mmu:12122; P70444; Q99M39	Apoptosis; Apoptosis Modulation by HSP70; Alzheimers Disease	Activation of BAD and translocation to mitochondria ; Activation and oligomerization of BAK protein; BH3-only proteins associate with and inactivate anti-apoptotic BCL-2 members; Activation, myristolyation of BID and translocation to mitochondria; Activation, translocation and oligomerization of BAX	8	0
High	Q60967	Bifunctional 3'-phosphoadenosine 5'-phosphosulfate synthase 1 OS=Mus musculus OX=10090 GN=Papss1 PE=1 SV=1	0.005	3.959	6	3	3	3	624	70.7	6.77	2.01	3	Pf01583, Pf01747	23971	ENSMUSG00000028032	Papss1	mmu:23971; Q3U647; Q60967	Purine metabolism	Transport and synthesis of PAPS	2	0
Low	Q8R079	Bifunctional apoptosis regulator OS=Mus musculus OX=10090 GN=Bfar PE=1 SV=1	0.138	1.059	5	1	1	1	450	52.9	6.89	2.18	1	Pf15227	67118	ENSMUSG00000022684	Bfar	mmu:67118; Q8C1A7; Q8R079; Q9CXY3			0	0
High	Q9DBL7	Bifunctional coenzyme A synthase OS=Mus musculus OX=10090 GN=Coasy PE=1 SV=2	0	9.223	6	4	5	4	563	62	7.11	8.47	4	Pf01467	71743	ENSMUSG00000001755	Coasy	A2BFA8; mmu:71743; Q3TVZ2; Q8K3Y4; Q9DBL7		Coenzyme A biosynthesis	1	0
High	P34914	Bifunctional epoxide hydrolase 2 OS=Mus musculus OX=10090 GN=Ephx2 PE=1 SV=2	0	7.525	6	2	3	2	554	62.5	6.19	9.23	2	Pf00561, Pf00702	13850	ENSMUSG00000022040	Ephx2	mmu:13850; P34914; Q8CGV0	Arachidonate Epoxygenase Epoxide Hydrolase; Metapathway biotransformation; Eicosanoid metabolism via Cytochrome P450 Mono-Oxygenases (CYP) pathway	Peroxisomal protein import; Synthesis of epoxy (EET) and dihydroxyeicosatrienoic acids (DHET); Biosynthesis of maresins	6	0
High	Q8CGC7	Bifunctional glutamate/proline--tRNA ligase OS=Mus musculus OX=10090 GN=Eprs PE=1 SV=4	0	32.878	13	16	21	15	1512	170	7.66	33.08	16	Pf00587, Pf00749, Pf03129, Pf09180	107508	ENSMUSG00000026615	Eprs1	E9QKC4; mmu:107508; Q3UFJ2; Q4VC16; Q8CGC7	Parkinsons Disease Pathway		1	1
Low	Q9CXT6	Bifunctional peptidase and arginyl-hydroxylase JMJD5 OS=Mus musculus OX=10090 GN=Kdm8 PE=1 SV=1	0.225	0.794	4	1	1	1	414	47.1	5.5	2.27	1	Pf13621	77035	ENSMUSG00000030752	Kdm8	mmu:77035; Q9CXT6			0	0
High	Q9CWJ9	Bifunctional purine biosynthesis protein PURH OS=Mus musculus OX=10090 GN=Atic PE=1 SV=2	0	16.826	14	6	10	6	592	64.2	6.76	19.63	6	Pf01808	108147	ENSMUSG00000026192	Atic	mmu:108147; Q3UTQ3; Q80UH0; Q8BPF0; Q8BQV9; Q9CRI1; Q9CWJ9; Q9CZW9	Purine metabolism; One Carbon Metabolism	Purine ribonucleoside monophosphate biosynthesis	3	0
Low	Q60641	Bile acid receptor OS=Mus musculus OX=10090 GN=Nr1h4 PE=1 SV=3	0.222	0.798	4	1	1	1	488	56	6.86	0	1	Pf00104, Pf00105	20186	ENSMUSG00000047638	Nr1h4	D3YTT2; E9QJW2; mmu:20186; Q60641; Q60642; Q60643	Nuclear receptors in lipid metabolism and toxicity	Nuclear Receptor transcription pathway; SUMOylation of intracellular receptors; Recycling of bile acids and salts; Synthesis of bile acids and bile salts via 7alpha-hydroxycholesterol; Synthesis of bile acids and bile salts via 27-hydroxycholesterol; Endogenous sterols	8	0
Low	Q9QY30	Bile salt export pump OS=Mus musculus OX=10090 GN=Abcb11 PE=1 SV=2	0.081	1.415	2	1	1	1	1321	146.7	7.66	0	1	Pf00005	27413	ENSMUSG00000027048	Abcb11	A2AUN4; mmu:27413; Q9QY30; Q9QZE8	Nuclear receptors in lipid metabolism and toxicity	Recycling of bile acids and salts; Synthesis of bile acids and bile salts via 7alpha-hydroxycholesterol	3	0
Low	P52843	Bile salt sulfotransferase 1 OS=Mus musculus OX=10090 GN=Sult2a1 PE=1 SV=1	0.161	0.972	4	1	1	1	285	33.2	7.91	0	1	Pf00685	20859	ENSMUSG00000078798	Sult2a1	mmu:20859; P52843	Metapathway biotransformation		1	0
High	Q9CY64	Biliverdin reductase A OS=Mus musculus OX=10090 GN=Blvra PE=1 SV=1	0	11.24	15	5	12	5	295	33.5	7.02	18.32	5	Pf01408, Pf09166	109778	ENSMUSG00000001999	Blvra	mmu:109778; Q3T9C6; Q80WR6; Q9CY64; Q9DD21		Cytoprotection by HMOX1; Heme degradation	2	0
Medium	O55102	Biogenesis of lysosome-related organelles complex 1 subunit 1 OS=Mus musculus OX=10090 GN=Bloc1s1 PE=1 SV=2	0.039	1.918	9	1	1	1	125	14.3	8.15	0	1	Pf06320	14533	ENSMUSG00000090247	Bloc1s1	mmu:14533; O55102; Q9DC96		Golgi Associated Vesicle Biogenesis; Lysosome Vesicle Biogenesis	2	0
Low	Q9CWG9	Biogenesis of lysosome-related organelles complex 1 subunit 2 OS=Mus musculus OX=10090 GN=Bloc1s2 PE=1 SV=1	0.262	0.71	5	1	1	1	143	16.3	4.88	2.5	1	Pf10046	73689	ENSMUSG00000057506	Bloc1s2	A2ATZ7; mmu:73689; Q6P062; Q9CWG9			0	0
Medium	E9Q6J5	Biorientation of chromosomes in cell division protein 1-like 1 OS=Mus musculus OX=10090 GN=Bod1l PE=1 SV=1	0.032	2.031	1	2	2	2	3032	327.3	5.33	2.44	2	Pf05205	665775	ENSMUSG00000061755	Bod1l	E9Q6J5; mmu:665775; O35243; Q3TR39; Q3USW6; Q80TF0; Q8BHG7			0	0
High	Q920N2	Biotin--protein ligase OS=Mus musculus OX=10090 GN=Hlcs PE=1 SV=1	0	20.429	13	7	11	7	722	78.5	5.34	22.49	7	Pf02237, Pf03099	110948	ENSMUSG00000040820	Hlcs	mmu:110948; Q920N2		Biotin transport and metabolism	1	0
Low	O89106	Bis(5'-adenosyl)-triphosphatase OS=Mus musculus OX=10090 GN=Fhit PE=1 SV=3	0.21	0.83	12	1	1	1	150	17.2	6.73	0	1	Pf01230	14198	ENSMUSG00000060579	Fhit	mmu:14198; O89106; Q6URW5; Q91VL1	Purine metabolism		1	0
High	P56380	Bis(5'-nucleosyl)-tetraphosphatase [asymmetrical] OS=Mus musculus OX=10090 GN=Nudt2 PE=1 SV=3	0	9.05	27	3	5	3	147	17	6.28	13.24	3	Pf00293	66401	ENSMUSG00000028443	Nudt2	mmu:66401; P56380; Q9D2U6; Q9D6V2	Purine metabolism	Detoxification of Reactive Oxygen Species	2	0
High	Q8R016	Bleomycin hydrolase OS=Mus musculus OX=10090 GN=Blmh PE=1 SV=1	0	6.615	10	3	3	3	455	52.5	6.48	0	3	Pf03051	104184	ENSMUSG00000020840	Blmh	mmu:104184; Q3TJR8; Q8BLZ4; Q8BZH9; Q8C111; Q8CID9; Q8R016		Antigen processing: Ubiquitination & Proteasome degradation	1	0
High	Q8R1Y2	bMERB domain-containing protein 1 OS=Mus musculus OX=10090 GN=Bmerb1 PE=1 SV=1	0.004	4.203	5	1	2	1	203	23.5	5.63	4.63	1	Pf12130	67254	ENSMUSG00000044117	Bmerb1	mmu:67254; Q3UVX0; Q8R1Y2			0	0
High	Q91Z96	BMP-2-inducible protein kinase OS=Mus musculus OX=10090 GN=Bmp2k PE=1 SV=1	0.009	3.122	2	2	5	1	1138	126.1	6.8	2.01	2	Pf00069, Pf15282	140780	ENSMUSG00000034663	Bmp2k	mmu:140780; Q8C8L7; Q91Z96			0	0
High	Q9D8S9	BolA-like protein 1 OS=Mus musculus OX=10090 GN=Bola1 PE=1 SV=1	0	7.809	23	2	2	2	137	14.4	8.76	2.97	2	Pf01722	69168	ENSMUSG00000015943	Bola1	mmu:69168; Q9D8S9			0	0
High	Q8BGS2	BolA-like protein 2 OS=Mus musculus OX=10090 GN=Bola2 PE=1 SV=1	0	6.152	22	1	1	1	86	10.2	6.16	3.41	1	Pf01722	66162	ENSMUSG00000047721	Bola2	mmu:66162; Q0P601; Q8BGS2			0	0
Low	Q9R229	Bone morphogenetic protein 10 OS=Mus musculus OX=10090 GN=Bmp10 PE=1 SV=2	0.176	0.92	3	1	1	1	421	47.9	4.84	0	1	Pf00019	12154	ENSMUSG00000030046	Bmp10	A6H6S5; mmu:12154; Q9R229; Q9Z1V8	Heart Development	Molecules associated with elastic fibres; Signaling by BMP	3	0
High	O35607	Bone morphogenetic protein receptor type-2 OS=Mus musculus OX=10090 GN=Bmpr2 PE=1 SV=1	0	52.417	22	17	27	17	1038	114.9	6.23	60.39	17	Pf01064	12168	ENSMUSG00000067336	Bmpr2	mmu:12168; O35607	PluriNetWork: mechanisms associated with pluripotency; Heart Development; ESC Pluripotency Pathways; Id Signaling Pathway	Signaling by BMP	5	0
Low	Q3UFB2	Box C/D snoRNA protein 1 OS=Mus musculus OX=10090 GN=Znhit6 PE=1 SV=2	0.25	0.736	2	1	1	1	460	52.2	5.57	0	1	Pf04438	229937	ENSMUSG00000074182	Znhit6	B2RW16; mmu:229937; Q3TG81; Q3UFB2			0	0
Medium	Q8BU51	BPI fold-containing family B member 6 OS=Mus musculus OX=10090 GN=Bpifb6 PE=2 SV=3	0.05	1.755	6	1	1	1	449	48.8	7.33	0	1	Pf01273, Pf02886	228796	ENSMUSG00000068009	Bpifb6	A2APD0; mmu:228796; Q80ZU8; Q8BU51		Antimicrobial peptides	1	0
High	Q91XV3	Brain acid soluble protein 1 OS=Mus musculus OX=10090 GN=Basp1 PE=1 SV=3	0	237.421	95	30	120	30	226	22.1	4.51	362.18	30	Pf05466	70350	ENSMUSG00000045763	Basp1	mmu:70350; Q91XV3		RHOF GTPase cycle	1	0
Medium	Q9Z2B2	Brain mitochondrial carrier protein 1 OS=Mus musculus OX=10090 GN=Slc25a14 PE=1 SV=2	0.016	2.449	3	1	1	1	325	36.3	9.69	2.25	1	Pf00153	20523	ENSMUSG00000031105	Slc25a14	mmu:20523; Q9ESI8; Q9Z2B2	Electron Transport Chain	The fatty acid cycling model; The proton buffering model	3	0
High	Q68EF6	Brain-enriched guanylate kinase-associated protein OS=Mus musculus OX=10090 GN=Begain PE=1 SV=2	0	35.516	30	14	25	14	600	65.3	5.87	53.47	14		380785	ENSMUSG00000040867	Begain	mmu:380785; Q68EF6			0	0
High	Q8BKX1	Brain-specific angiogenesis inhibitor 1-associated protein 2 OS=Mus musculus OX=10090 GN=Baiap2 PE=1 SV=2	0	100.94	63	30	72	30	535	59.2	9.04	132.53	30	Pf07653, Pf08397	108100	ENSMUSG00000025372	Baiap2	mmu:108100; Q8BKX1; Q91V97; Q923V9; Q923W0	Regulation of Actin Cytoskeleton	CDC42 GTPase cycle; RAC1 GTPase cycle; RAC3 GTPase cycle; VEGFA-VEGFR2 Pathway; Regulation of actin dynamics for phagocytic cup formation; RHO GTPases Activate WASPs and WAVEs	7	0
Low	Q80Y61	Brain-specific angiogenesis inhibitor 1-associated protein 2-like protein 2 OS=Mus musculus OX=10090 GN=Baiap2l2 PE=1 SV=1	0.19	0.883	2	1	1	1	522	58.4	9.5	0	1	Pf08397, Pf14604	207495	ENSMUSG00000018126	Baiap2l2	mmu:207495; Q3UP58; Q80Y61		RHOF GTPase cycle	1	0
High	P24288	Branched-chain-amino-acid aminotransferase, cytosolic OS=Mus musculus OX=10090 GN=Bcat1 PE=1 SV=2	0	10.659	12	5	7	5	386	42.8	5.39	7.89	5	Pf01063	12035	ENSMUSG00000030268	Bcat1	mmu:12035; P24288; Q7TMT2	One carbon metabolism and related pathways	Branched-chain amino acid catabolism	2	0
High	Q6PAJ1	Breakpoint cluster region protein OS=Mus musculus OX=10090 GN=Bcr PE=1 SV=3	0	67.255	19	21	38	18	1270	143	6.92	72.72	21	Pf00168, Pf09036, Pf19057	110279	ENSMUSG00000009681	Bcr	E9PZL3; mmu:110279; Q61339; Q6PAJ1; Q6ZPE5; Q99LW5		RHOA GTPase cycle; RHOB GTPase cycle; RHOC GTPase cycle; CDC42 GTPase cycle; RAC1 GTPase cycle; RAC3 GTPase cycle; RAC2 GTPase cycle	7	0
High	Q61140	Breast cancer anti-estrogen resistance protein 1 OS=Mus musculus OX=10090 GN=Bcar1 PE=1 SV=2	0	59.99	25	16	33	16	874	94.2	5.68	74.02	16	Pf08824, Pf12026	12927	ENSMUSG00000031955	Bcar1	mmu:12927; Q60869; Q61140; Q6PFF9	Chemokine signaling pathway; Regulation of Actin Cytoskeleton; EGFR1 Signaling Pathway; Integrin-mediated Cell Adhesion; Focal Adhesion	Downstream signal transduction; VEGFA-VEGFR2 Pathway; PTK6 Regulates RHO GTPases, RAS GTPase and MAP kinases; p130Cas linkage to MAPK signaling for integrins	9	0
High	Q9QZK2	Breast cancer anti-estrogen resistance protein 3 OS=Mus musculus OX=10090 GN=Bcar3 PE=1 SV=1	0.003	4.393	2	2	5	2	820	92.2	7.81	8.39	2	Pf00617	29815	ENSMUSG00000028121	Bcar3	mmu:29815; Q3TNC9; Q3UP10; Q9QZK2			0	0
Medium	P48754	Breast cancer type 1 susceptibility protein homolog OS=Mus musculus OX=10090 GN=Brca1 PE=1 SV=3	0.03	2.077	1	2	2	2	1812	198.7	5.76	2.24	2	Pf00097, Pf00533	12189	ENSMUSG00000017146	Brca1	A2A4Q4; mmu:12189; P48754; Q60957; Q60983	Estrogen signaling; PluriNetWork: mechanisms associated with pluripotency; mRNA processing	SUMOylation of DNA damage response and repair proteins	4	0
Low	P97929	Breast cancer type 2 susceptibility protein homolog OS=Mus musculus OX=10090 GN=Brca2 PE=1 SV=2	0.094	1.305	0	1	1	1	3329	370.4	6.67	2.11	1	Pf09103, Pf09104, Pf09121, Pf09169	12190	ENSMUSG00000041147	Brca2	F8VPU5; mmu:12190; O35922; P97383; P97929	Homologous recombination	Resolution of D-loop Structures through Holliday Junction Intermediates; Presynaptic phase of homologous DNA pairing and strand exchange	5	0
High	Q80YN3	Breast carcinoma-amplified sequence 1 homolog OS=Mus musculus OX=10090 GN=Bcas1 PE=1 SV=3	0	46.594	25	12	27	12	633	67.3	6.21	62.3	12		76960	ENSMUSG00000013523	Bcas1	A2AVX2; mmu:76960; Q80YN3; Q9CVA1			0	0
High	Q8CCN5	Breast carcinoma-amplified sequence 3 homolog OS=Mus musculus OX=10090 GN=Bcas3 PE=1 SV=2	0	55.906	20	15	38	15	928	101	6.7	83.45	15		192197	ENSMUSG00000059439	Bcas3	mmu:192197; Q8CC16; Q8CCN5; Q9EPX3			0	0
High	G3X9K3	Brefeldin A-inhibited guanine nucleotide-exchange protein 1 OS=Mus musculus OX=10090 GN=Arfgef1 PE=1 SV=1	0	51.057	12	20	33	10	1846	208.4	5.86	46.66	20	Pf09324	211673	ENSMUSG00000067851	Arfgef1	G3X9K3; mmu:211673; Q8BKL2			0	8
High	A2A5R2	Brefeldin A-inhibited guanine nucleotide-exchange protein 2 OS=Mus musculus OX=10090 GN=Arfgef2 PE=1 SV=1	0	42.457	11	18	24	8	1792	202.1	6.55	34.25	18	Pf09324	99371	ENSMUSG00000074582	Arfgef2	A2A5R2; mmu:99371			0	0
High	Q3UGY8	Brefeldin A-inhibited guanine nucleotide-exchange protein 3 OS=Mus musculus OX=10090 GN=Arfgef3 PE=1 SV=1	0	82.279	11	21	35	21	2170	239.9	5.88	78.45	21	Pf09324	215821	ENSMUSG00000019852	Arfgef3	mmu:215821; Q3UGY8; Q80TH0			0	0
High	Q61361	Brevican core protein OS=Mus musculus OX=10090 GN=Bcan PE=1 SV=2	0	31.117	15	10	20	10	883	95.8	4.93	37.83	10	Pf07686	12032	ENSMUSG00000004892	Bcan	mmu:12032; Q61361; Q80WT7	Spinal Cord Injury	Degradation of the extracellular matrix; ECM proteoglycans; A tetrasaccharide linker sequence is required for GAG synthesis; Chondroitin sulfate biosynthesis; CS/DS degradation; Dermatan sulfate biosynthesis	7	0
High	Q8BXV2	BRI3-binding protein OS=Mus musculus OX=10090 GN=Bri3bp PE=1 SV=1	0.006	3.772	12	2	5	2	253	28.2	9.52	7.64	2	Pf14965	76809	ENSMUSG00000037905	Bri3bp	mmu:76809; Q8BXP1; Q8BXV2; Q9CWE5			0	0
Medium	Q3UI43	BRISC and BRCA1-A complex member 1 OS=Mus musculus OX=10090 GN=Babam1 PE=1 SV=1	0.039	1.915	3	1	1	1	333	36.8	4.55	0	1		68251	ENSMUSG00000031820	Babam1	mmu:68251; Q3UI43; Q8C5Q8; Q99JU2; Q9CTJ4		Metalloprotease DUBs; Processing of DNA double-strand break ends; Recruitment and ATM-mediated phosphorylation of repair and signaling proteins at DNA double strand breaks; G2/M DNA damage checkpoint	4	0
High	Q3TCJ1	BRISC complex subunit Abraxas 2 OS=Mus musculus OX=10090 GN=Abraxas2 PE=1 SV=1	0	22.625	14	6	12	6	415	46.9	6.18	27.88	6		109359		Abraxas2	mmu:109359; Q3TB08; Q3TCJ1; Q8K0R4		Metalloprotease DUBs	1	0
High	Q8K2Q7	BRO1 domain-containing protein BROX OS=Mus musculus OX=10090 GN=Brox PE=1 SV=1	0	12.466	17	6	9	6	411	46.2	7.69	19.27	6	Pf03097	71678	ENSMUSG00000046836	Brox	mmu:71678; Q8BWM8; Q8K2Q7; Q9DCT7			0	0
High	Q7TMS5	Broad substrate specificity ATP-binding cassette transporter ABCG2 OS=Mus musculus OX=10090 GN=Abcg2 PE=1 SV=1	0	7.424	5	4	4	3	657	72.9	8.54	7	4	Pf19055	26357		Abcg2	mmu:26357; Q7TMS5; Q9R004; Q9Z1T0	Irinotecan Pathway	Iron uptake and transport; Heme degradation; Heme biosynthesis	4	0
Low	Q9ESU6	Bromodomain-containing protein 4 OS=Mus musculus OX=10090 GN=Brd4 PE=1 SV=2	0.211	0.824	1	1	1	1	1400	155.8	9.19	0	1	Pf00439, Pf17035	57261	ENSMUSG00000024002	Brd4	B0V2V7; mmu:57261; Q8VHF7; Q8VHF8; Q9ESU6			0	0
Low	O88665	Bromodomain-containing protein 7 OS=Mus musculus OX=10090 GN=Brd7 PE=1 SV=1	0.236	0.769	2	1	1	1	651	74	6.38	0	1	Pf00439, Pf12024	26992	ENSMUSG00000031660	Brd7	mmu:26992; O88665; Q3UQ56; Q3UU06; Q9CT78	Wnt Signaling Pathway NetPath	Regulation of TP53 Activity through Acetylation	2	0
Low	Q8C8N3	Brorin OS=Mus musculus OX=10090 GN=Vwc2 PE=1 SV=1	0.217	0.811	4	1	1	1	324	35.4	5.38	0	1	Pf00093	319922	ENSMUSG00000050830	Vwc2	B2RQ98; mmu:319922; Q5SSH5; Q8C8N3			0	0
High	Q80Y55	BSD domain-containing protein 1 OS=Mus musculus OX=10090 GN=Bsdc1 PE=1 SV=1	0.004	3.999	3	1	1	1	427	46.9	4.4	2.19	1		100383	ENSMUSG00000040859	Bsdc1	B2KGE2; mmu:100383; Q80Y55; Q8BI04; Q8VDP1			0	0
High	Q9DB72	BTB/POZ domain-containing protein 17 OS=Mus musculus OX=10090 GN=Btbd17 PE=1 SV=1	0.003	4.39	6	2	3	2	478	52.6	9.42	4.5	2	Pf00651	72014	ENSMUSG00000000202	Btbd17	mmu:72014; Q9DB72			0	0
Low	A0A0A6YY25	BTB/POZ domain-containing protein 18 OS=Mus musculus OX=10090 GN=Btbd18 PE=1 SV=1	0.213	0.821	1	1	1	1	723	79.4	4.97	0	1	Pf00651	100270744	ENSMUSG00000086598	Btbd18	A0A0A6YY25; mmu:100270744			0	0
Medium	Q8C726	BTB/POZ domain-containing protein 9 OS=Mus musculus OX=10090 GN=Btbd9 PE=1 SV=1	0.047	1.789	2	2	2	1	612	69.1	5.68	1.78	2	Pf00651, Pf00754	224671	ENSMUSG00000062202	Btbd9	mmu:224671; Q8C726			0	0
Medium	Q5M956	BTB/POZ domain-containing protein KCTD1 OS=Mus musculus OX=10090 GN=Kctd1 PE=1 SV=1	0.038	1.931	7	1	1	1	257	29.4	7.08	0	1	Pf02214	106931	ENSMUSG00000036225	Kctd1	mmu:106931; Q5EER9; Q5M956		Negative regulation of activity of TFAP2 (AP-2) family transcription factors	1	0
High	Q6WVG3	BTB/POZ domain-containing protein KCTD12 OS=Mus musculus OX=10090 GN=Kctd12 PE=1 SV=1	0	11.47	16	5	8	4	327	35.9	5.81	15.01	5	Pf02214	239217		Kctd12	mmu:239217; Q3T9E3; Q6WVG3			0	0
High	Q5DTY9	BTB/POZ domain-containing protein KCTD16 OS=Mus musculus OX=10090 GN=Kctd16 PE=1 SV=2	0	42.2	33	15	32	14	427	48.9	8.19	54.72	15	Pf02214	383348	ENSMUSG00000051401	Kctd16	mmu:383348; Q5DTY9; Q78Y50			0	1
Medium	Q3URF8	BTB/POZ domain-containing protein KCTD21 OS=Mus musculus OX=10090 GN=Kctd21 PE=1 SV=1	0.03	2.058	7	1	1	1	260	29.6	6.79	0	1	Pf02214	622320		Kctd21	mmu:622320; Q3URF8			0	0
High	Q8BFX3	BTB/POZ domain-containing protein KCTD3 OS=Mus musculus OX=10090 GN=Kctd3 PE=1 SV=1	0	6.498	7	4	6	4	815	88.8	7.15	3.89	4	Pf02214	226823	ENSMUSG00000026608	Kctd3	mmu:226823; Q6P7X4; Q8BFX3		CDC42 GTPase cycle	1	0
High	Q8VC57	BTB/POZ domain-containing protein KCTD5 OS=Mus musculus OX=10090 GN=Kctd5 PE=1 SV=1	0	6.625	12	2	4	2	234	26.1	5.95	2.99	2	Pf02214	69259		Kctd5	mmu:69259; Q3UPC0; Q8VC57			0	0
High	Q9JMD0	BUB3-interacting and GLEBS motif-containing protein ZNF207 OS=Mus musculus OX=10090 GN=Znf207 PE=1 SV=1	0	6.809	3	1	4	1	495	52.8	9.1	12.89	1		22680	ENSMUSG00000017421	Znf207	E9PW12; mmu:22680; Q99LA2; Q9JMD0; Q9Z326			0	0
High	Q922D8	C-1-tetrahydrofolate synthase, cytoplasmic OS=Mus musculus OX=10090 GN=Mthfd1 PE=1 SV=4	0	42.224	21	18	30	17	935	101.1	7.14	37.45	18	Pf00763, Pf02882	108156	ENSMUSG00000021048	Mthfd1	mmu:108156; Q8R013; Q922D8	One Carbon Metabolism	Metabolism of folate and pterines	2	1
Low	Q9Z121	C-C motif chemokine 8 OS=Mus musculus OX=10090 GN=Ccl8 PE=3 SV=1	0.221	0.801	6	1	5	1	97	11	8.35	0	1		20307	ENSMUSG00000009185	Ccl8	mmu:20307; Q9Z121	Chemokine signaling pathway		1	0
High	Q9WVI9	C-Jun-amino-terminal kinase-interacting protein 1 OS=Mus musculus OX=10090 GN=Mapk8ip1 PE=1 SV=2	0	24.698	14	9	19	9	707	77.2	4.96	39.04	9	Pf14604	19099	ENSMUSG00000027223	Mapk8ip1	mmu:19099; O35145; Q925J8; Q9R1H9; Q9R1Z1; Q9WVI7; Q9WVI8; Q9WVI9	Wnt Signaling Pathway NetPath		1	0
Medium	Q9ERE9	C-Jun-amino-terminal kinase-interacting protein 2 OS=Mus musculus OX=10090 GN=Mapk8ip2 PE=1 SV=1	0.015	2.507	1	1	1	1	830	89.8	4.42	0	1	Pf14604	60597	ENSMUSG00000022619	Mapk8ip2	mmu:60597; Q9CXI4; Q9ERE9			0	0
High	Q9ESN9	C-Jun-amino-terminal kinase-interacting protein 3 OS=Mus musculus OX=10090 GN=Mapk8ip3 PE=1 SV=1	0	135.331	24	31	72	26	1337	147.5	5.45	150.33	31		30957	ENSMUSG00000024163	Mapk8ip3	mmu:30957; Q5D062; Q99KU7; Q9EQD8; Q9ESN7; Q9ESN8; Q9ESN9; Q9ESP0; Q9JLH2; Q9JLH3; Q9R0U7	MAPK signaling pathway		1	5
High	Q58A65	C-Jun-amino-terminal kinase-interacting protein 4 OS=Mus musculus OX=10090 GN=Spag9 PE=1 SV=2	0	57.525	18	19	36	14	1321	146.1	5.15	60.29	19		70834	ENSMUSG00000020859	Spag9	mmu:70834; Q3UH77; Q3UHF0; Q58A65; Q58VQ4; Q5NC70; Q5NC78; Q6A057; Q6PAS3; Q8CJC2		Myogenesis	1	0
High	Q9D486	C-Maf-inducing protein OS=Mus musculus OX=10090 GN=Cmip PE=1 SV=3	0	15.547	8	5	6	5	773	86.2	6.81	12.63	5		74440	ENSMUSG00000034390	Cmip	mmu:74440; Q69ZD2; Q8C3N2; Q8K148; Q9D486			0	0
High	O88712	C-terminal-binding protein 1 OS=Mus musculus OX=10090 GN=Ctbp1 PE=1 SV=2	0	46.37	23	9	23	5	441	47.7	6.77	45.94	9	Pf00389, Pf02826	13016	ENSMUSG00000037373	Ctbp1	mmu:13016; O88712; Q3TAT1; Q3TDL5; Q3TUM5; Q91WI6; Q91YX3; Q9QYG2	PluriNetWork: mechanisms associated with pluripotency; Notch Signaling Pathway; Wnt Signaling Pathway NetPath; Wnt Signaling Pathway and Pluripotency	SUMOylation of transcription cofactors; Deactivation of the beta-catenin transactivating complex; Repression of WNT target genes	7	4
High	P56546	C-terminal-binding protein 2 OS=Mus musculus OX=10090 GN=Ctbp2 PE=1 SV=2	0	18.292	13	6	14	2	445	48.9	6.95	20.59	6	Pf00389, Pf02826	13017	ENSMUSG00000030970	Ctbp2	mmu:13017; O54855; O88462; P56546	PluriNetWork: mechanisms associated with pluripotency; Neural Crest Differentiation; Notch Signaling Pathway; Wnt Signaling Pathway NetPath; Wnt Signaling Pathway and Pluripotency	Repression of WNT target genes	6	0
Low	Q9JMG2	C1GALT1-specific chaperone 1 OS=Mus musculus OX=10090 GN=C1galt1c1 PE=2 SV=1	0.16	0.973	3	1	1	1	316	36	6.74	0	1		59048	ENSMUSG00000048970	C1galt1c1	mmu:59048; Q9JMG2		O-linked glycosylation of mucins	1	0
High	Q5HZI2	C2 calcium-dependent domain-containing protein 4C OS=Mus musculus OX=10090 GN=C2cd4cC2CD4 family PE=1 SV=1	0	17.219	21	6	9	5	419	44.6	9.73	15.92	6	Pf00168	237397	ENSMUSG00000045912	C2cd4c	mmu:237397; Q5HZI2; Q8CDK0			0	0
Low	Q52KB6	C2 domain-containing protein 3 OS=Mus musculus OX=10090 GN=C2cd3 PE=1 SV=3	0.221	0.802	0	1	1	1	2323	255.2	6.95	0	1		277939	ENSMUSG00000047248	C2cd3	E9QL99; mmu:277939; Q3UFQ3; Q52KB6; Q80V48; Q8BXE5		Anchoring of the basal body to the plasma membrane	1	0
High	Q7TPS5	C2 domain-containing protein 5 OS=Mus musculus OX=10090 GN=C2cd5 PE=1 SV=2	0	19.238	9	7	14	7	1016	111.6	5.78	25.34	7		74741	ENSMUSG00000030279	C2cd5	mmu:74741; Q3TQY6; Q6A052; Q7TPS5; Q80VA1; Q8C0U3; Q8CID5; Q9CS85			0	0
High	Q80W54	CAAX prenyl protease 1 homolog OS=Mus musculus OX=10090 GN=Zmpste24 PE=1 SV=2	0.003	4.687	14	4	4	4	475	54.7	6.95	0	4	Pf01435	230709	ENSMUSG00000043207	Zmpste24	mmu:230709; Q80W54; Q8BJK4; Q8K569	Adipogenesis genes		1	0
Low	Q9CS00	Cactin OS=Mus musculus OX=10090 GN=Cactin PE=1 SV=2	0.192	0.876	1	1	1	1	772	90.6	9.79	2.14	1	Pf09732	70312	ENSMUSG00000034889	Cactin	mmu:70312; Q9CS00			0	0
High	B2RQC6	CAD protein OS=Mus musculus OX=10090 GN=Cad PE=1 SV=1	0	34.02	8	12	17	12	2225	243.1	6.43	31.73	12	Pf00117, Pf00185, Pf01979, Pf02729	69719	ENSMUSG00000013629	Cad	B2RQC6; B7ZN27; mmu:69719	PluriNetWork: mechanisms associated with pluripotency	Pyrimidine biosynthesis	2	0
Low	O35161	Cadherin EGF LAG seven-pass G-type receptor 1 OS=Mus musculus OX=10090 GN=Celsr1 PE=1 SV=3	0.248	0.741	1	1	1	1	3034	330.3	5.88	0	1	Pf00002, Pf00008, Pf00028, Pf00053, Pf01825, Pf02210, Pf02793, Pf16489	12614	ENSMUSG00000016028	Celsr1	E9QK27; mmu:12614; O35161	Non-odorant GPCRs; GPCRs, Other		2	0
High	Q9R0M0	Cadherin EGF LAG seven-pass G-type receptor 2 OS=Mus musculus OX=10090 GN=Celsr2 PE=1 SV=3	0.009	2.985	1	3	4	2	2919	316.8	5.47	4.02	3	Pf00002, Pf00008, Pf00028, Pf00053, Pf01825, Pf02210, Pf16489	53883	ENSMUSG00000068740	Celsr2	A2AEE7; mmu:53883; Q99K26; Q9R0M0; Q9Z2R4	Non-odorant GPCRs; GPCRs, Other		2	0
Low	Q91ZI0	Cadherin EGF LAG seven-pass G-type receptor 3 OS=Mus musculus OX=10090 GN=Celsr3 PE=2 SV=2	0.23	0.782	0	1	1	1	3301	358.3	6.6	1.78	1	Pf00002, Pf00008, Pf00028, Pf00053, Pf02210, Pf16489	107934	ENSMUSG00000023473; ENSMUSG00000107269	Celsr3	E9QLD7; mmu:107934; Q91ZI0; Q9ESD0	Non-odorant GPCRs; GPCRs, Other		2	0
Low	P70408	Cadherin-10 OS=Mus musculus OX=10090 GN=Cdh10 PE=1 SV=3	0.063	1.611	2	1	3	1	788	88.3	4.94	4.15	1	Pf00028, Pf01049	320873	ENSMUSG00000022321	Cdh10	mmu:320873; P70408; Q3UUB3; Q80WS7		Adherens junctions interactions	1	0
High	P55288	Cadherin-11 OS=Mus musculus OX=10090 GN=Cdh11 PE=1 SV=1	0	17.246	7	5	8	5	796	88.1	4.89	15.69	5	Pf00028, Pf01049	12552	ENSMUSG00000031673	Cdh11	mmu:12552; P55288		Adherens junctions interactions	1	0
Low	Q5RJH3	Cadherin-12 OS=Mus musculus OX=10090 GN=Cdh12 PE=2 SV=1	0.068	1.56	6	2	2	2	794	88.4	4.83	0	2	Pf00028, Pf01049	215654	ENSMUSG00000040452	Cdh12	mmu:215654; Q5RJH3		Adherens junctions interactions	1	0
High	Q9WTR5	Cadherin-13 OS=Mus musculus OX=10090 GN=Cdh13 PE=1 SV=2	0	27.166	13	8	11	8	714	78.1	5.12	22.05	8	Pf00028, Pf08758	12554	ENSMUSG00000031841	Cdh13	mmu:12554; Q8BG11; Q9WTR5		Adherens junctions interactions	1	0
High	P15116	Cadherin-2 OS=Mus musculus OX=10090 GN=Cdh2 PE=1 SV=2	0	15.073	8	5	9	5	906	99.7	4.78	12.94	5	Pf00028, Pf01049, Pf08758	12558	ENSMUSG00000024304	Cdh2	mmu:12558; P15116; Q64260; Q6GU11	Splicing factor NOVA regulated synaptic proteins; Neural Crest Differentiation; Primary Focal Segmental Glomerulosclerosis FSGS	Regulation of Insulin-like Growth Factor (IGF) transport and uptake by Insulin-like Growth Factor Binding Proteins (IGFBPs); Post-translational protein phosphorylation; Adherens junctions interactions; Myogenesis	7	0
High	P97326	Cadherin-6 OS=Mus musculus OX=10090 GN=Cdh6 PE=1 SV=2	0.009	3.124	2	1	1	1	790	88.3	5	2.6	1	Pf00028, Pf01049	12563	ENSMUSG00000039385	Cdh6	mmu:12563; P70393; P97326; Q3KNY8	Neural Crest Differentiation	Adherens junctions interactions	2	0
Low	P97291	Cadherin-8 OS=Mus musculus OX=10090 GN=Cdh8 PE=1 SV=2	0.094	1.315	1	1	1	1	799	88.2	4.74	2.17	1	Pf00028, Pf01049	12564	ENSMUSG00000036510	Cdh8	G3UVU4; mmu:12564; P97291		Adherens junctions interactions	1	0
High	P70407	Cadherin-9 OS=Mus musculus OX=10090 GN=Cdh9 PE=2 SV=2	0.009	3.405	2	1	1	1	786	88.2	4.96	2.43	1	Pf00028, Pf01049			Cdh9	P70407		Adherens junctions interactions	1	0
High	P12658	Calbindin OS=Mus musculus OX=10090 GN=Calb1 PE=1 SV=2	0	7.644	15	4	5	3	261	30	4.83	5.28	4	Pf00036, Pf13499	12307	ENSMUSG00000028222	Calb1	mmu:12307; P12658; Q545N6	Vitamin D Receptor Pathway		1	1
High	Q63810	Calcineurin subunit B type 1 OS=Mus musculus OX=10090 GN=Ppp3r1 PE=1 SV=3	0	14.695	29	4	8	4	170	19.3	4.81	15.42	4	Pf13499	19058	ENSMUSG00000033953	Ppp3r1	mmu:19058; Q3V067; Q5F225; Q63810	Alzheimers Disease; MAPK signaling pathway	FCERI mediated Ca+2 mobilization; Ca2+ pathway; Calcineurin activates NFAT; CLEC7A (Dectin-1) induces NFAT activation; Activation of BAD and translocation to mitochondria	7	0
High	Q9JHG6	Calcipressin-1 OS=Mus musculus OX=10090 GN=Rcan1 PE=1 SV=2	0	9.496	20	4	5	4	251	28.1	5.41	5.93	4	Pf04847	54720	ENSMUSG00000022951	Rcan1	mmu:54720; Q7TNY3; Q91WQ4; Q9JHG6; Q9JK50; Q9JK51; Q9JKK2; Q9JKK3	MicroRNAs in Cardiomyocyte Hypertrophy		1	0
Low	Q8BG21	Calcium channel flower homolog OS=Mus musculus OX=10090 GN=Cacfd1 PE=1 SV=1	0.109	1.214	5	1	1	1	171	18.3	5.44	0	1		381356	ENSMUSG00000015488	Cacfd1	A2AR22; A2AR23; mmu:381356; Q8BG21; Q8C9W0; Q8CC30; Q9CX69			0	0
Medium	Q8CGZ0	Calcium homeostasis endoplasmic reticulum protein OS=Mus musculus OX=10090 GN=Cherp PE=1 SV=1	0.014	2.584	1	1	2	1	936	106.1	9.14	4.99	1	Pf01585, Pf01805	27967		Cherp	mmu:27967; Q8CGZ0; Q8K291; Q8VCD2		mRNA Splicing - Major Pathway	1	0
High	Q921L3	Calcium load-activated calcium channel OS=Mus musculus OX=10090 GN=Tmco1 PE=1 SV=1	0.009	2.978	7	1	1	1	188	21.2	9.74	0	1		68944	ENSMUSG00000052428	Tmco1	mmu:68944; Q3TS11; Q921L3			0	0
High	Q8CBX0	Calcium permeable stress-gated cation channel 1 OS=Mus musculus OX=10090 GN=Tmem63c PE=1 SV=1	0	10.468	5	2	3	2	802	93	7.77	10.56	2	Pf02714, Pf13967, Pf14703	217733	ENSMUSG00000034145	Tmem63c	mmu:217733; Q8CBX0			0	0
High	P49070	Calcium signal-modulating cyclophilin ligand OS=Mus musculus OX=10090 GN=Camlg PE=1 SV=2	0	11.674	10	2	6	2	294	32.5	7.74	20.35	2	Pf14963	12328	ENSMUSG00000021501	Camlg	mmu:12328; P49070; Q99JU5			0	0
High	Q3UMR5	Calcium uniporter protein, mitochondrial OS=Mus musculus OX=10090 GN=Mcu PE=1 SV=2	0	15.917	19	6	9	6	350	39.7	8.56	17.55	6	Pf04678	215999	ENSMUSG00000009647	Mcu	B2RTD1; mmu:215999; Q3TTK3; Q3UMR5		Processing of SMDT1	2	0
High	Q8VCX5	Calcium uptake protein 1, mitochondrial OS=Mus musculus OX=10090 GN=Micu1 PE=1 SV=1	0	9.91	13	4	7	4	477	54.3	8.59	17.76	4	Pf13202, Pf13833	216001	ENSMUSG00000020111	Micu1	mmu:216001; Q8BK07; Q8BL84; Q8R1W0; Q8VCX5		Processing of SMDT1	2	0
High	Q9CTY5	Calcium uptake protein 3, mitochondrial OS=Mus musculus OX=10090 GN=Micu3 PE=2 SV=2	0	10.794	10	4	5	4	523	59.8	7.15	11.29	4	Pf13833	78506	ENSMUSG00000039478	Micu3	mmu:78506; Q9CTY5		Processing of SMDT1	2	0
Low	Q8BG22	Calcium-activated chloride channel regulator 2 OS=Mus musculus OX=10090 GN=Clca2 PE=2 SV=1	0.178	0.913	2	1	1	1	942	103.6	6.19	0	1	Pf08434, Pf13519	229933	ENSMUSG00000036960	Clca2	mmu:229933; Q8BG22; Q8BZF7	Alpha6-Beta4 Integrin Signaling Pathway	Stimuli-sensing channels	2	0
Low	Q6Q473	Calcium-activated chloride channel regulator 4A OS=Mus musculus OX=10090 GN=Clca4a PE=1 SV=2	0.255	0.723	1	1	1	1	924	101.8	5.2	0	1	Pf00092, Pf08434			Clca4a	Q6Q472; Q6Q473		Stimuli-sensing channels	1	0
High	Q08460	Calcium-activated potassium channel subunit alpha-1 OS=Mus musculus OX=10090 GN=Kcnma1 PE=1 SV=2	0	24.138	7	5	10	5	1209	134.3	7.15	29.43	5	Pf03493	16531		Kcnma1	mmu:16531; Q08460; Q64703; Q8VHF1; Q9R196	Splicing factor NOVA regulated synaptic proteins	Ca2+ activated K+ channels	2	0
High	Q8CGU1	Calcium-binding and coiled-coil domain-containing protein 1 OS=Mus musculus OX=10090 GN=Calcoco1 PE=1 SV=2	0	14.07	6	3	7	3	691	77.2	4.82	19.14	3	Pf07888, Pf17751, Pf18112	67488	ENSMUSG00000023055	Calcoco1	mmu:67488; Q5DTX0; Q8CGU1; Q9D935			0	0
High	Q8BH59	Calcium-binding mitochondrial carrier protein Aralar1 OS=Mus musculus OX=10090 GN=Slc25a12 PE=1 SV=1	0	60.193	33	18	40	18	677	74.5	8.25	84.99	18	Pf00153	78830	ENSMUSG00000027010	Slc25a12	A2BFG0; mmu:78830; Q8BH59		Gluconeogenesis; Aspartate and asparagine metabolism	2	0
Medium	A2ASZ8	Calcium-binding mitochondrial carrier protein SCaMC-2 OS=Mus musculus OX=10090 GN=Slc25a25 PE=1 SV=1	0.015	2.521	4	2	3	1	469	52.6	8.54	3.38	2	Pf00153, Pf13499, Pf13833	227731	ENSMUSG00000026819	Slc25a25	A2ASZ1; A2ASZ5; A2ASZ8; A2ASZ9; mmu:227731; Q6NXM8; Q80T78; Q8BHG0; Q8JZT8; Q8VBT4; Q99KD3			0	0
High	Q6GQS1	Calcium-binding mitochondrial carrier protein SCaMC-3 OS=Mus musculus OX=10090 GN=Slc25a23 PE=1 SV=1	0	7.512	7	3	5	2	467	52.5	7.59	8.91	3	Pf00153, Pf13499	66972	ENSMUSG00000046329	Slc25a23	mmu:66972; Q6GQS1			0	1
High	Q06138	Calcium-binding protein 39 OS=Mus musculus OX=10090 GN=Cab39 PE=1 SV=2	0.004	4.161	6	3	4	3	341	39.8	6.89	5.87	3	Pf08569	12283	ENSMUSG00000036707	Cab39	mmu:12283; Q06138; Q8VDZ8	Endochondral Ossification; Focal Adhesion-PI3K-Akt-mTOR-signaling pathway	Neutrophil degranulation; Energy dependent regulation of mTOR by LKB1-AMPK	4	0
Low	Q9JLK3	Calcium-binding protein 5 OS=Mus musculus OX=10090 GN=Cabp5 PE=1 SV=1	0.123	1.127	14	1	1	1	173	19.7	4.45	2.41	1	Pf13499	29865	ENSMUSG00000005649	Cabp5	mmu:29865; Q9JLK3			0	0
High	Q80TJ1	Calcium-dependent secretion activator 1 OS=Mus musculus OX=10090 GN=Cadps PE=1 SV=3	0	178.229	40	48	128	38	1355	153	5.74	239.78	48	Pf00169, Pf06292	27062	ENSMUSG00000054423	Cadps	E9QN90; mmu:27062; Q3TSP2; Q61374; Q6AXB4; Q6PGF0; Q80TJ1			0	10
High	Q8BYR5	Calcium-dependent secretion activator 2 OS=Mus musculus OX=10090 GN=Cadps2 PE=1 SV=2	0	54.024	18	20	39	11	1297	147.7	6.14	58.41	20	Pf00169, Pf06292	320405	ENSMUSG00000017978	Cadps2	mmu:320405; O08903; Q66JM7; Q6PCL7; Q76I88; Q7TMM6; Q80ZV8; Q8BL25; Q8BY04; Q8BYR5; Q8K3K6			0	0
Low	Q8K1N1	Calcium-independent phospholipase A2-gamma OS=Mus musculus OX=10090 GN=Pnpla8 PE=1 SV=1	0.066	1.585	1	1	1	1	776	87.3	9.23	0	1	Pf01734	67452	ENSMUSG00000036257	Pnpla8	mmu:67452; Q3TH33; Q8K1N1; Q8VEC0; Q9DC20	Eicosanoid Synthesis	Acyl chain remodelling of PC; Acyl chain remodelling of PE	3	0
High	Q9CR86	Calcium-regulated heat stable protein 1 OS=Mus musculus OX=10090 GN=Carhsp1 PE=1 SV=1	0.004	4.069	16	2	3	2	148	16.1	8.21	4.06	2		52502	ENSMUSG00000008393	Carhsp1	mmu:52502; Q9CR86			0	0
Medium	Q8BW22	Calcium-responsive transactivator OS=Mus musculus OX=10090 GN=Ss18l1 PE=1 SV=1	0.01	2.872	6	1	1	1	402	43.7	6.58	2.65	1	Pf05030	269397	ENSMUSG00000039086	Ss18l1	mmu:269397; Q6A014; Q7TQF3; Q8BW22; Q8BYQ7			0	0
Low	Q8VHI4	Calcium-responsive transcription factor OS=Mus musculus OX=10090 GN=Carf PE=2 SV=1	0.088	1.36	1	1	1	1	689	76.3	5.31	2.43	1	Pf15299	241066	ENSMUSG00000026017	Carf	B2RRZ9; mmu:241066; Q8VHI4			0	0
High	Q80XR2	Calcium-transporting ATPase type 2C member 1 OS=Mus musculus OX=10090 GN=Atp2c1 PE=1 SV=2	0.002	5.008	3	2	3	2	918	100.2	6.83	4.35	2	Pf00689, Pf00690, Pf00702	235574	ENSMUSG00000032570	Atp2c1	E9QMB9; mmu:235574; Q80XR2; Q80YZ2		Ion transport by P-type ATPases	1	0
High	Q61481	Calcium/calmodulin-dependent 3',5'-cyclic nucleotide phosphodiesterase 1A OS=Mus musculus OX=10090 GN=Pde1a PE=1 SV=3	0	48.543	31	13	26	12	545	62.3	5.91	56.06	13	Pf08499	18573	ENSMUSG00000059173	Pde1a	E9Q6V1; mmu:18573; O35388; Q5I7S8; Q61481; Q8BRR9; Q9JLL9	Purine metabolism; G Protein Signaling Pathways	G alpha (s) signalling events; cGMP effects; Cam-PDE 1 activation	5	0
High	Q01065	Calcium/calmodulin-dependent 3',5'-cyclic nucleotide phosphodiesterase 1B OS=Mus musculus OX=10090 GN=Pde1b PE=1 SV=2	0	58.363	31	14	32	13	535	61.2	5.72	83.89	14	Pf08499	18574	ENSMUSG00000022489	Pde1b	mmu:18574; O35384; Q01065	Purine metabolism; G Protein Signaling Pathways	G alpha (s) signalling events; cGMP effects; Cam-PDE 1 activation	5	1
High	Q64338	Calcium/calmodulin-dependent 3',5'-cyclic nucleotide phosphodiesterase 1C OS=Mus musculus OX=10090 GN=Pde1c PE=1 SV=2	0	7.734	5	3	7	1	706	80.2	9.06	5.69	3	Pf08499	18575	ENSMUSG00000004347	Pde1c	mmu:18575; Q62045; Q64338; Q8BSV6	Purine metabolism; G Protein Signaling Pathways	Cam-PDE 1 activation	3	0
High	Q78WH7	Calcium/calmodulin-dependent protein kinase II inhibitor 2 OS=Mus musculus OX=10090 GN=Camk2n2 PE=1 SV=1	0.007	3.624	16	1	4	1	79	8.6	5.48	7.45	1	Pf15170	73047	ENSMUSG00000051146	Camk2n2	mmu:73047; Q78WH7			0	0
High	Q8VBY2	Calcium/calmodulin-dependent protein kinase kinase 1 OS=Mus musculus OX=10090 GN=Camkk1 PE=1 SV=1	0	19.409	19	6	12	6	505	55.8	5.99	25.35	6	Pf00069	55984	ENSMUSG00000020785	Camkk1	mmu:55984; Q8VBY2; Q9R054		CaMK IV-mediated phosphorylation of CREB; CREB1 phosphorylation through the activation of CaMKII/CaMKK/CaMKIV cascasde; Activation of RAC1 downstream of NMDARs	3	0
High	Q8C078	Calcium/calmodulin-dependent protein kinase kinase 2 OS=Mus musculus OX=10090 GN=Camkk2 PE=1 SV=2	0	61.356	39	19	43	19	588	64.6	5.9	78.09	19	Pf00069	207565	ENSMUSG00000029471	Camkk2	mmu:207565; Q80TS0; Q8BXM8; Q8C078; Q8C0G3; Q8CH42; Q8QZT7		CaMK IV-mediated phosphorylation of CREB; CREB1 phosphorylation through the activation of CaMKII/CaMKK/CaMKIV cascasde; Activation of RAC1 downstream of NMDARs	3	0
High	Q91YS8	Calcium/calmodulin-dependent protein kinase type 1 OS=Mus musculus OX=10090 GN=Camk1 PE=1 SV=1	0	30.035	30	8	15	5	374	41.6	5.35	36.8	8		52163	ENSMUSG00000030272	Camk1	mmu:52163; Q91YS8	Calcium Regulation in the Cardiac Cell	Activation of RAC1 downstream of NMDARs	2	0
Medium	Q9QYK9	Calcium/calmodulin-dependent protein kinase type 1B OS=Mus musculus OX=10090 GN=Pnck PE=1 SV=1	0.016	2.457	6	2	3	2	343	38.5	6.47	2.06	2		93843	ENSMUSG00000002012	Pnck	mmu:93843; Q80W07; Q9QYK9			0	0
High	Q8BW96	Calcium/calmodulin-dependent protein kinase type 1D OS=Mus musculus OX=10090 GN=Camk1d PE=1 SV=2	0	51.415	30	10	28	7	385	42.9	7.17	71.56	10		227541	ENSMUSG00000039145	Camk1d	mmu:227541; Q3U450; Q80W64; Q8BW96; Q8BWI7			0	2
High	P11798	Calcium/calmodulin-dependent protein kinase type II subunit alpha OS=Mus musculus OX=10090 GN=Camk2a PE=1 SV=2	0	147.689	51	28	157	17	478	54.1	7.08	328.22	28	Pf08332	12322	ENSMUSG00000024617	Camk2a	mmu:12322; P11798; Q61284; Q6ZWN4	ErbB signaling pathway; Myometrial Relaxation and Contraction Pathways; Wnt Signaling Pathway NetPath; Calcium Regulation in the Cardiac Cell; EGFR1 Signaling Pathway	Ion homeostasis; HSF1-dependent transactivation; Unblocking of NMDA receptors, glutamate binding and activation; RAF activation; Ion transport by P-type ATPases; Phase 0 - rapid depolarisation; Ca2+ pathway; Trafficking of AMPA receptors; Interferon gamma signaling	15	4
High	P28652	Calcium/calmodulin-dependent protein kinase type II subunit beta OS=Mus musculus OX=10090 GN=Camk2b PE=1 SV=2	0	175.75	57	29	158	16	542	60.4	7.28	349.9	29	Pf08332	12323	ENSMUSG00000057897	Camk2b	mmu:12323; P28652; Q5SVH9	Hypothetical Network for Drug Addiction; Serotonin and anxiety; Primary Focal Segmental Glomerulosclerosis FSGS; Myometrial Relaxation and Contraction Pathways; Wnt Signaling Pathway NetPath; Calcium Regulation in the Cardiac Cell	Ion homeostasis; HSF1-dependent transactivation; Unblocking of NMDA receptors, glutamate binding and activation; RAF activation; Ion transport by P-type ATPases; Phase 0 - rapid depolarisation; Trafficking of AMPA receptors; Interferon gamma signaling	15	14
High	Q6PHZ2	Calcium/calmodulin-dependent protein kinase type II subunit delta OS=Mus musculus OX=10090 GN=Camk2d PE=1 SV=1	0	97.945	44	22	86	9	499	56.3	7.25	162.92	22	Pf08332	108058	ENSMUSG00000053819	Camk2d	mmu:108058; Q3UF87; Q3UQH9; Q5DTK4; Q6PHZ2; Q8CAC5; Q9CZE2	MicroRNAs in Cardiomyocyte Hypertrophy; Myometrial Relaxation and Contraction Pathways; Wnt Signaling Pathway NetPath; Calcium Regulation in the Cardiac Cell	Trafficking of AMPA receptors; Ion transport by P-type ATPases; Ion homeostasis; Unblocking of NMDA receptors, glutamate binding and activation; HSF1-dependent transactivation; Phase 0 - rapid depolarisation; RAF activation; Interferon gamma signaling	13	0
High	Q923T9	Calcium/calmodulin-dependent protein kinase type II subunit gamma OS=Mus musculus OX=10090 GN=Camk2g PE=1 SV=1	0	98.984	48	26	107	12	529	59.6	7.58	207.34	26	Pf08332	12325	ENSMUSG00000021820	Camk2g	mmu:12325; Q3U3H3; Q8VED3; Q923T9	Splicing factor NOVA regulated synaptic proteins; Myometrial Relaxation and Contraction Pathways; Wnt Signaling Pathway NetPath; Calcium Regulation in the Cardiac Cell	Phase 0 - rapid depolarisation; RAF activation; HSF1-dependent transactivation; Ion homeostasis; Ion transport by P-type ATPases; Unblocking of NMDA receptors, glutamate binding and activation; Interferon gamma signaling; Trafficking of AMPA receptors	13	1
High	P08414	Calcium/calmodulin-dependent protein kinase type IV OS=Mus musculus OX=10090 GN=Camk4 PE=1 SV=2	0	77.667	49	23	54	23	469	52.6	4.93	92.92	23				Camk4	P08414; Q61381		CaMK IV-mediated phosphorylation of CREB; CREB1 phosphorylation through the activation of CaMKII/CaMKK/CaMKIV cascasde	2	0
High	Q9CXW3	Calcyclin-binding protein OS=Mus musculus OX=10090 GN=Cacybp PE=1 SV=1	0	11.058	16	5	10	5	229	26.5	7.87	14.17	5	Pf04969, Pf05002, Pf09032	12301	ENSMUSG00000014226	Cacybp	mmu:12301; O70140; Q9CXW3			0	0
High	Q8C5W0	Calmin OS=Mus musculus OX=10090 GN=Clmn PE=1 SV=2	0	7.886	6	5	5	5	1052	117.2	5.03	5.88	5	Pf00307	94040	ENSMUSG00000021097	Clmn	mmu:94040; Q8C5W0; Q91V71; Q91XT7; Q91XT8; Q91XU9			0	0
Low	P63054	Calmodulin regulator protein PCP4 OS=Mus musculus OX=10090 GN=Pcp4 PE=3 SV=2	0.141	1.051	15	1	1	1	62	6.8	6.71	0	1		18546	ENSMUSG00000090223	Pcp4	mmu:18546; P07734; P63054; Q63890			0	0
High	P0DP27	Calmodulin-2 OS=Mus musculus OX=10090 GN=Calm2 PE=1 SV=1	0	26.849	52	10	37	10	149	16.8	4.22	42.4	10	Pf13499	12313; 12314; 12315	ENSMUSG00000001175; ENSMUSG00000019370; ENSMUSG00000036438	Calm2	mmu:12313; mmu:12314; mmu:12315; P02593; P0DP27; P62204; P70667; P99014; Q3TEH7; Q3THK5; Q3U6Z5; Q3U7C7; Q498A3; Q61379; Q61380; Q8BNC9; Q91VQ9; Q9D6G4	Endochondral Ossification; MicroRNAs in Cardiomyocyte Hypertrophy; Alzheimers Disease; G Protein Signaling Pathways; G13 Signaling Pathway; Glycogen Metabolism; Myometrial Relaxation and Contraction Pathways; Calcium Regulation in the Cardiac Cell		8	0
Low	Q80Y50	Calmodulin-binding transcription activator 2 OS=Mus musculus OX=10090 GN=Camta2 PE=2 SV=1	0.232	0.777	1	1	1	1	1208	131.9	7.36	0	1	Pf01833	216874	ENSMUSG00000040712	Camta2	B0QZH5; mmu:216874; Q3TFK0; Q5SX54; Q5SX68; Q6PHS5; Q80TP1; Q80Y50; Q8R0D9; Q8R2N5			0	0
High	A2AHC3	Calmodulin-regulated spectrin-associated protein 1 OS=Mus musculus OX=10090 GN=Camsap1 PE=1 SV=1	0	105.733	29	41	66	39	1581	175.8	6.95	114.8	41	Pf11971	227634	ENSMUSG00000026933	Camsap1	A2AHC3; mmu:227634; Q7TQF8; Q8CBV3			0	2
High	Q8C1B1	Calmodulin-regulated spectrin-associated protein 2 OS=Mus musculus OX=10090 GN=Camsap2 PE=1 SV=3	0	61.18	17	21	38	21	1461	164.2	6.86	74.36	21	Pf11971	67886	ENSMUSG00000041570	Camsap2	B7ZNI4; mmu:67886; Q80TK8; Q8C1B1; Q8C4J5			0	0
High	Q80VC9	Calmodulin-regulated spectrin-associated protein 3 OS=Mus musculus OX=10090 GN=Camsap3 PE=1 SV=1	0	99.086	35	33	80	32	1252	135.1	8.43	154.4	33	Pf11971	69697	ENSMUSG00000044433	Camsap3	E9Q5B0; mmu:69697; Q5DTW9; Q80VC9; Q8BUZ0; U5LGR7; U5LGS1; U5LGS5; U5LGT0; U5LHT8; U5LHU4; U5LHW1; U5LHW4; U5LHW9; U5LK15; U5LK19; U5LK24; U5LK70; U5LK74; U5LK79			0	0
High	P35564	Calnexin OS=Mus musculus OX=10090 GN=Canx PE=1 SV=1	0	35.054	21	11	21	11	591	67.2	4.64	50.14	11		12330	ENSMUSG00000020368	Canx	mmu:12330; P35564		MHC class II antigen presentation; Antigen Presentation: Folding, assembly and peptide loading of class I MHC; Interleukin-27 signaling; Calnexin/calreticulin cycle	4	0
High	O88456	Calpain small subunit 1 OS=Mus musculus OX=10090 GN=Capns1 PE=1 SV=1	0.001	5.699	9	2	2	2	269	28.4	5.63	5.33	2	Pf13833	12336		Capns1	mmu:12336; O88456; Q3V0X5; Q5BKQ2; Q8CEI2; Q8VEK4; Q9R1C5	IL-1 Signaling Pathway; Integrin-mediated Cell Adhesion	Degradation of the extracellular matrix	3	0
High	O35350	Calpain-1 catalytic subunit OS=Mus musculus OX=10090 GN=Capn1 PE=1 SV=1	0	10.545	6	4	7	4	713	82.1	5.87	9.99	4	Pf01067, Pf13833	12333	ENSMUSG00000024942	Capn1	mmu:12333; O35350; O88666	Alzheimers Disease; IL-1 Signaling Pathway; Integrin-mediated Cell Adhesion; Focal Adhesion	Neutrophil degranulation; Degradation of the extracellular matrix	6	0
Low	Q9ESK3	Calpain-10 OS=Mus musculus OX=10090 GN=Capn10 PE=2 SV=2	0.073	1.489	2	1	1	1	666	74.5	7.28	0	1	Pf01067	23830	ENSMUSG00000026270	Capn10	mmu:23830; Q99J13; Q9ESK3; Q9WVF0	Integrin-mediated Cell Adhesion	Degradation of the extracellular matrix	2	0
High	O08529	Calpain-2 catalytic subunit OS=Mus musculus OX=10090 GN=Capn2 PE=1 SV=4	0	47.246	23	14	24	14	700	79.8	4.96	51.95	14	Pf01067, Pf13833	12334	ENSMUSG00000026509	Capn2	mmu:12334; O08529; O35518; O54843	Alzheimers Disease; Integrin-mediated Cell Adhesion	Degradation of the extracellular matrix	3	0
High	O08688	Calpain-5 OS=Mus musculus OX=10090 GN=Capn5 PE=1 SV=1	0	10.238	9	5	9	5	640	72.9	7.36	10.61	5	Pf01067	12337	ENSMUSG00000035547	Capn5	mmu:12337; O08688; Q91YU0	Integrin-mediated Cell Adhesion	Degradation of the extracellular matrix	2	0
Medium	Q9R1S8	Calpain-7 OS=Mus musculus OX=10090 GN=Capn7 PE=2 SV=1	0.025	2.177	2	2	2	2	813	92.5	7.97	3.81	2	Pf01067, Pf04212	12339	ENSMUSG00000021893	Capn7	mmu:12339; Q9R1S8; Q9Z0P9	Integrin-mediated Cell Adhesion	Degradation of the extracellular matrix	2	0
Low	P51125	Calpastatin OS=Mus musculus OX=10090 GN=Cast PE=1 SV=2	0.238	0.764	1	1	2	1	788	84.9	5.52	2.18	1	Pf00748	12380	ENSMUSG00000021585	Cast	mmu:12380; P51125; Q9EQV4; Q9EQV5; Q9QXQ3; Q9QXQ4; Q9R0N1		Degradation of the extracellular matrix	1	0
High	Q9DAW9	Calponin-3 OS=Mus musculus OX=10090 GN=Cnn3 PE=1 SV=1	0.007	3.641	9	3	5	3	330	36.4	5.72	6.49	3	Pf00307, Pf00402	71994	ENSMUSG00000053931	Cnn3	mmu:71994; Q3TW23; Q9DAW9			0	0
High	P14211	Calreticulin OS=Mus musculus OX=10090 GN=Calr PE=1 SV=1	0	31.549	25	10	20	10	416	48	4.49	41.16	10		12317	ENSMUSG00000003814	Calr	mmu:12317; P14211; Q3TVD2	Calcium Regulation in the Cardiac Cell	ER-Phagosome pathway; Antigen Presentation: Folding, assembly and peptide loading of class I MHC; Scavenging by Class A Receptors; Calnexin/calreticulin cycle	5	0
High	Q08331	Calretinin OS=Mus musculus OX=10090 GN=Calb2 PE=1 SV=3	0	12.177	15	4	7	3	271	31.4	5.02	12.09	4	Pf00036, Pf13499	12308	ENSMUSG00000003657	Calb2	mmu:12308; Q08331; Q60964; Q9JM81			0	0
High	Q9EPL2	Calsyntenin-1 OS=Mus musculus OX=10090 GN=Clstn1 PE=1 SV=1	0	8.58	5	4	6	4	979	108.8	4.92	7.99	4	Pf00028, Pf13385, Pf19699	65945	ENSMUSG00000039953	Clstn1	A2A800; B2KFP1; B2KFP2; mmu:65945; Q69ZV9; Q7TS67; Q8K103; Q9EPL2	Splicing factor NOVA regulated synaptic proteins		1	0
High	Q99JH7	Calsyntenin-3 OS=Mus musculus OX=10090 GN=Clstn3 PE=1 SV=1	0	7.511	5	4	7	4	956	105.8	5.34	6.49	4	Pf00028, Pf19699	232370	ENSMUSG00000008153	Clstn3	mmu:232370; Q544R0; Q99JH7			0	0
High	O35887	Calumenin OS=Mus musculus OX=10090 GN=Calu PE=1 SV=1	0.002	5.034	5	1	1	1	315	37	4.67	3.27	1	Pf13202, Pf13833	12321	ENSMUSG00000029767	Calu	mmu:12321; O35887		Regulation of Insulin-like Growth Factor (IGF) transport and uptake by Insulin-like Growth Factor Binding Proteins (IGFBPs); Post-translational protein phosphorylation	2	0
High	Q3UHL1	CaM kinase-like vesicle-associated protein OS=Mus musculus OX=10090 GN=Camkv PE=1 SV=2	0	112.522	54	26	80	26	512	54.8	5.54	202.2	26	Pf00069	235604	ENSMUSG00000032936	Camkv	mmu:235604; Q3UHL1; Q8VD20			0	0
High	Q8CA95	cAMP and cAMP-inhibited cGMP 3',5'-cyclic phosphodiesterase 10A OS=Mus musculus OX=10090 GN=Pde10a PE=1 SV=2	0	64.118	27	20	40	20	790	89.4	6.6	79.69	20	Pf01590	23984	ENSMUSG00000023868	Pde10a	mmu:23984; Q3TLU6; Q3TRG6; Q69C21; Q8CA95; Q9WVI1	Purine metabolism	G alpha (s) signalling events; cGMP effects	3	0
High	P05132	cAMP-dependent protein kinase catalytic subunit alpha OS=Mus musculus OX=10090 GN=Prkaca PE=1 SV=3	0	33.149	27	9	14	5	351	40.5	8.79	44.2	9		18747	ENSMUSG00000005469	Prkaca	mmu:18747; P05132; Q9JID0	Estrogen signaling; Hypothetical Network for Drug Addiction; Endochondral Ossification; PluriNetWork: mechanisms associated with pluripotency; Chemokine signaling pathway; G Protein Signaling Pathways; TNF-alpha NF-kB Signaling Pathway; IL-3 Signaling Pathway; MAPK signaling pathway	RET signaling; VEGFA-VEGFR2 Pathway; Interleukin-3, Interleukin-5 and GM-CSF signaling; MAPK6/MAPK4 signaling; GLI3 is processed to GLI3R by the proteasome; Ion homeostasis; Anchoring of the basal body to the plasma membrane; Factors involved in megakaryocyte development and platelet production; Regulation of PLK1 Activity at G2/M Transition; Loss of Nlp from mitotic centrosomes; Recruitment of m…	34	0
High	P68181	cAMP-dependent protein kinase catalytic subunit beta OS=Mus musculus OX=10090 GN=Prkacb PE=1 SV=2	0	21.123	26	9	14	5	351	40.7	8.56	30.05	9		18749	ENSMUSG00000005034	Prkacb	mmu:18749; P05206; P68181; Q3TQH5; Q3UDD0; Q3UTH5	Chemokine signaling pathway; G Protein Signaling Pathways; Myometrial Relaxation and Contraction Pathways; Calcium Regulation in the Cardiac Cell	Factors involved in megakaryocyte development and platelet production; MAPK6/MAPK4 signaling; GLI3 is processed to GLI3R by the proteasome; PKA activation; CD209 (DC-SIGN) signaling; VEGFA-VEGFR2 Pathway; Glucagon-like Peptide-1 (GLP1) regulates insulin secretion; Vasopressin regulates renal water homeostasis via Aquaporins; Rap1 signalling; RET signaling; DARPP-32 events; PKA activation in gluca…	20	4
High	P63248	cAMP-dependent protein kinase inhibitor alpha OS=Mus musculus OX=10090 GN=Pkia PE=1 SV=2	0	8.449	24	2	3	2	76	8	4.54	9.23	2	Pf02827	18767	ENSMUSG00000027499	Pkia	mmu:18767; P27776; P63248; Q3UTL0	Myometrial Relaxation and Contraction Pathways; Calcium Regulation in the Cardiac Cell		2	0
Low	Q04758	cAMP-dependent protein kinase inhibitor beta OS=Mus musculus OX=10090 GN=Pkib PE=3 SV=1	0.174	0.93	17	1	1	1	92	9.7	4.84	0	1	Pf02827			Pkib	Q04758			0	0
High	Q9DBC7	cAMP-dependent protein kinase type I-alpha regulatory subunit OS=Mus musculus OX=10090 GN=Prkar1a PE=1 SV=3	0	33.997	20	7	12	6	381	43.2	5.35	32.27	7	Pf02197	19084	ENSMUSG00000020612	Prkar1a	mmu:19084; Q3UKU7; Q9DBC7; Q9JHR5; Q9JHR6	G Protein Signaling Pathways; Myometrial Relaxation and Contraction Pathways; Calcium Regulation in the Cardiac Cell; EGFR1 Signaling Pathway	Factors involved in megakaryocyte development and platelet production; Hedgehog 'off' state; PKA activation; Vasopressin regulates renal water homeostasis via Aquaporins; DARPP-32 events; PKA activation in glucagon signalling; CREB1 phosphorylation through the activation of Adenylate Cyclase	11	1
High	P12849	cAMP-dependent protein kinase type I-beta regulatory subunit OS=Mus musculus OX=10090 GN=Prkar1b PE=1 SV=2	0	24.584	16	6	11	5	381	43.2	5.96	28.5	6	Pf02197	19085	ENSMUSG00000025855	Prkar1b	mmu:19085; P12849	G Protein Signaling Pathways; Myometrial Relaxation and Contraction Pathways; Calcium Regulation in the Cardiac Cell	Hedgehog 'off' state; Factors involved in megakaryocyte development and platelet production; DARPP-32 events; Vasopressin regulates renal water homeostasis via Aquaporins; PKA activation; PKA activation in glucagon signalling; CREB1 phosphorylation through the activation of Adenylate Cyclase	10	0
High	P12367	cAMP-dependent protein kinase type II-alpha regulatory subunit OS=Mus musculus OX=10090 GN=Prkar2a PE=1 SV=2	0	35.512	26	9	18	5	401	45.4	4.89	33.59	9	Pf00027, Pf02197			Prkar2a	P12367		Hedgehog 'off' state; Factors involved in megakaryocyte development and platelet production; DARPP-32 events; Vasopressin regulates renal water homeostasis via Aquaporins; PKA activation; PKA activation in glucagon signalling; CREB1 phosphorylation through the activation of Adenylate Cyclase	7	0
High	P31324	cAMP-dependent protein kinase type II-beta regulatory subunit OS=Mus musculus OX=10090 GN=Prkar2b PE=1 SV=3	0	72.556	49	18	43	14	416	46.1	4.98	84.15	18	Pf00027, Pf02197	19088	ENSMUSG00000002997	Prkar2b	B1B199; mmu:19088; P31324; Q3UTZ1; Q80ZM4; Q8BRZ7	G Protein Signaling Pathways; Myometrial Relaxation and Contraction Pathways; Calcium Regulation in the Cardiac Cell	Anchoring of the basal body to the plasma membrane; Regulation of PLK1 Activity at G2/M Transition; Loss of Nlp from mitotic centrosomes; Recruitment of mitotic centrosome proteins and complexes; Recruitment of NuMA to mitotic centrosomes; AURKA Activation by TPX2; Hedgehog 'off' state; Factors involved in megakaryocyte development and platelet production; DARPP-32 events; Vasopressin regulates r…	17	4
High	Q9DCB4	cAMP-regulated phosphoprotein 21 OS=Mus musculus OX=10090 GN=Arpp21 PE=1 SV=2	0	16.715	9	7	14	7	807	88.5	7.39	26.9	7		74100	ENSMUSG00000032503	Arpp21	A1A561; mmu:74100; Q3UUU8; Q7TS83; Q8BLD1; Q8BWM1; Q8C018; Q8C038; Q8C0Y6; Q91Y59; Q9DCB4			0	0
High	O89084	cAMP-specific 3',5'-cyclic phosphodiesterase 4A OS=Mus musculus OX=10090 GN=Pde4a PE=1 SV=2	0	29.642	14	11	25	7	844	93.5	5.26	45.26	11	Pf18100	18577	ENSMUSG00000032177	Pde4a	mmu:18577; O89084; Q8R078; Q9JHQ4; Q9QX48; Q9QX49; Q9QXI8	Purine metabolism; G Protein Signaling Pathways	G alpha (s) signalling events; DARPP-32 events	4	0
Low	Q3UEI1	cAMP-specific 3',5'-cyclic phosphodiesterase 4C OS=Mus musculus OX=10090 GN=Pde4c PE=1 SV=1	0.058	1.637	2	2	3	1	686	76	5.02	1.67	2	Pf18100	110385	ENSMUSG00000031842; ENSMUSG00000111773	Pde4c	mmu:110385; Q3UEI1; Q8K0P4	Purine metabolism; G Protein Signaling Pathways	G alpha (s) signalling events; DARPP-32 events	4	0
High	Q01063	cAMP-specific 3',5'-cyclic phosphodiesterase 4D OS=Mus musculus OX=10090 GN=Pde4d PE=1 SV=2	0	33.436	18	12	24	8	747	84.5	4.91	45.15	12	Pf18100	238871	ENSMUSG00000021699	Pde4d	B2KF58; mmu:238871; Q01063; Q6TRH9; Q8C4Q7; Q8CG05	Purine metabolism; G Protein Signaling Pathways; Myometrial Relaxation and Contraction Pathways	G alpha (s) signalling events; DARPP-32 events	5	3
High	Q9CQA9	Cancer-related nucleoside-triphosphatase homolog OS=Mus musculus OX=10090 GN=Ntpcr PE=1 SV=1	0.005	3.969	20	2	2	2	190	20.7	9.72	5.33	2		66566	ENSMUSG00000031851	Ntpcr	mmu:66566; Q9CQA9			0	0
High	Q5PR69	Cancer-related regulator of actin dynamics OS=Mus musculus OX=10090 GN=Crad PE=1 SV=3	0	64.717	26	20	37	20	1207	132.2	5.4	72.08	20	Pf15262	320827		Crad	E9QLP4; mmu:320827; Q5PR69; Q80TH6; Q8C7K8; Q8C7R0; Q8C9F2; Q8CDM6			0	0
High	P47746	Cannabinoid receptor 1 OS=Mus musculus OX=10090 GN=Cnr1 PE=1 SV=1	0	9.409	7	4	7	4	473	52.8	8.27	10.82	4	Pf00001	12801	ENSMUSG00000044288	Cnr1	mmu:12801; P47746; Q5SF33	Non-odorant GPCRs; GPCRs, Class A Rhodopsin-like; Small Ligand GPCRs; GPCRs, Other	G alpha (i) signalling events; Class A/1 (Rhodopsin-like receptors)	6	0
High	Q922J3	CAP-Gly domain-containing linker protein 1 OS=Mus musculus OX=10090 GN=Clip1 PE=1 SV=1	0	98.06	24	32	57	25	1391	155.7	5.24	105.53	32	Pf01302	56430	ENSMUSG00000049550	Clip1	mmu:56430; Q571L7; Q922J3		Separation of Sister Chromatids; Resolution of Sister Chromatid Cohesion; RHO GTPases Activate Formins; EML4 and NUDC in mitotic spindle formation; RHO GTPases activate IQGAPs; Amplification of signal from unattached kinetochores via a MAD2 inhibitory signal	7	0
High	Q9Z0H8	CAP-Gly domain-containing linker protein 2 OS=Mus musculus OX=10090 GN=Clip2 PE=1 SV=2	0	165.406	47	48	91	37	1047	115.8	6.48	192.16	48	Pf01302	269713	ENSMUSG00000063146	Clip2	mmu:269713; Q7TSI9; Q8CHU1; Q9EP81; Q9Z0H8			0	9
High	B9EHT4	CAP-Gly domain-containing linker protein 3 OS=Mus musculus OX=10090 GN=Clip3 PE=1 SV=1	0.007	3.571	9	3	3	3	547	59.5	7.94	1.69	3	Pf01302, Pf12796	76686	ENSMUSG00000013921	Clip3	B9EHT4; mmu:76686; Q7TNI1; Q9DB67		Regulation of TNFR1 signaling	1	0
High	Q3V3V9	Capping protein, Arp2/3 and myosin-I linker protein 2 OS=Mus musculus OX=10090 GN=Carmil2 PE=1 SV=2	0	22.217	6	6	13	6	1296	141.3	7.18	35.9	6	Pf16000			Carmil2	Q3V3V9			0	0
High	Q3UFQ8	Capping protein, Arp2/3 and myosin-I linker protein 3 OS=Mus musculus OX=10090 GN=Carmil3 PE=1 SV=2	0	16.69	7	8	10	8	1375	150.3	7.72	16.2	8	Pf13516, Pf16000	268747	ENSMUSG00000022211	Carmil3	mmu:268747; Q3UFQ8; Q6KAP3			0	0
High	Q60865	Caprin-1 OS=Mus musculus OX=10090 GN=Caprin1 PE=1 SV=2	0	39.078	18	10	25	10	707	78.1	5.25	50.21	10	Pf12287, Pf18293	53872	ENSMUSG00000027184	Caprin1	mmu:53872; Q60758; Q60865; Q61620; Q6IMN3; Q7TT26			0	0
Low	Q80WV3	Carbohydrate sulfotransferase 2 OS=Mus musculus OX=10090 GN=Chst2 PE=2 SV=3	0.218	0.807	2	1	1	1	530	57.8	9.99	1.68	1	Pf00685	54371	ENSMUSG00000033350	Chst2	E9QNG2; mmu:54371; O88276; Q794G9; Q80WV3	Metapathway biotransformation	Keratan sulfate biosynthesis	2	0
High	P00920	Carbonic anhydrase 2 OS=Mus musculus OX=10090 GN=Ca2 PE=1 SV=4	0	22.835	28	6	9	6	260	29	7.01	18.8	6		12349	ENSMUSG00000027562	Ca2	mmu:12349; P00920; Q6LDQ7; Q7TPE1; Q9DCT3; Q9DCY9		Erythrocytes take up carbon dioxide and release oxygen; Erythrocytes take up oxygen and release carbon dioxide; Reversible hydration of carbon dioxide	3	0
High	P48758	Carbonyl reductase [NADPH] 1 OS=Mus musculus OX=10090 GN=Cbr1 PE=1 SV=3	0	31.544	44	9	18	9	277	30.6	8.31	41.87	9	Pf00106	12408	ENSMUSG00000051483	Cbr1	mmu:12408; P48758; Q91X28		Synthesis of Prostaglandins (PG) and Thromboxanes (TX)	1	0
High	Q8K354	Carbonyl reductase [NADPH] 3 OS=Mus musculus OX=10090 GN=Cbr3 PE=1 SV=1	0	13.036	18	3	6	3	277	30.9	6.57	17.48	3	Pf00106	109857	ENSMUSG00000022947	Cbr3	mmu:109857; Q8K354		Phase I - Functionalization of compounds	1	0
High	Q91VT4	Carbonyl reductase family member 4 OS=Mus musculus OX=10090 GN=Cbr4 PE=1 SV=2	0.005	3.901	6	1	2	1	236	25.4	9.69	2.88	1	Pf13561	234309	ENSMUSG00000031641	Cbr4	mmu:234309; Q3UBY4; Q8BXV1; Q91VT4		Fatty acyl-CoA biosynthesis	1	0
High	Q00493	Carboxypeptidase E OS=Mus musculus OX=10090 GN=Cpe PE=1 SV=2	0	6.632	6	3	5	3	476	53.2	5.19	4.02	3		12876	ENSMUSG00000037852	Cpe	mmu:12876; Q00493; Q64439			0	0
High	Q80V42	Carboxypeptidase M OS=Mus musculus OX=10090 GN=Cpm PE=1 SV=2	0.004	4.237	7	2	3	2	443	50.5	7.78	6.4	2		70574	ENSMUSG00000020183	Cpm	mmu:70574; Q497S5; Q80V42; Q9CYH8		Post-translational modification: synthesis of GPI-anchored proteins	1	0
Low	Q9D871	Carcinoembryonic antigen-related cell adhesion molecule 18 OS=Mus musculus OX=10090 GN=Ceacam18 PE=2 SV=1	0.128	1.102	5	1	1	1	376	42.2	6.76	2.03	1	Pf07686, Pf13895	72431	ENSMUSG00000030472	Ceacam18	mmu:72431; Q9D871			0	0
High	Q70KF4	Cardiomyopathy-associated protein 5 OS=Mus musculus OX=10090 GN=Cmya5 PE=1 SV=2	0.002	4.829	1	3	6	2	3739	412.8	4.75	5.53	3	Pf00041			Cmya5	Q70KF4; Q70X91; Q9CV01; Q9CV02; Q9ER93; Q9ER96			0	0
Low	P83714	Cardiotrophin-2 OS=Mus musculus OX=10090 GN=Ctf2 PE=1 SV=1	0.137	1.06	3	1	1	1	204	22	6.92	0	1		244218	ENSMUSG00000060034	Ctf2	mmu:244218; P83714			0	0
High	Q8BGD5	Carnitine O-palmitoyltransferase 1, brain isoform OS=Mus musculus OX=10090 GN=Cpt1c PE=1 SV=1	0	20.855	13	6	10	6	798	90	7.49	22.08	6	Pf00755	78070	ENSMUSG00000007783	Cpt1c	mmu:78070; Q6NZF8; Q8BGD5; Q8C071	PPAR signaling pathway		1	0
High	P97742	Carnitine O-palmitoyltransferase 1, liver isoform OS=Mus musculus OX=10090 GN=Cpt1a PE=1 SV=4	0.004	4.099	2	1	2	1	773	88.2	8.62	5.11	1	Pf00755	12894	ENSMUSG00000024900	Cpt1a	mmu:12894; O35288; P97742; Q80SW3; Q8BP98; Q8C7H8	Fatty Acid Beta Oxidation; PPAR signaling pathway; Mitochondrial LC-Fatty Acid Beta-Oxidation; Leptin and adiponectin	Carnitine metabolism; Signaling by Retinoic Acid	6	0
Medium	P52825	Carnitine O-palmitoyltransferase 2, mitochondrial OS=Mus musculus OX=10090 GN=Cpt2 PE=1 SV=2	0.014	2.54	2	1	1	1	658	73.9	8.37	3.02	1	Pf00755	12896	ENSMUSG00000028607	Cpt2	mmu:12896; P52825; Q3TFS0	Fatty Acid Beta Oxidation; PPAR signaling pathway; Mitochondrial LC-Fatty Acid Beta-Oxidation	Carnitine metabolism	4	0
High	Q8R555	Cartilage acidic protein 1 OS=Mus musculus OX=10090 GN=Crtac1 PE=2 SV=1	0.002	4.808	3	1	3	1	646	70.3	5.14	9.02	1	Pf07645, Pf13517	72832	ENSMUSG00000042401	Crtac1	mmu:72832; Q3UF32; Q3UF40; Q8BMF1; Q8R3V8; Q8R555			0	0
Medium	P51942	Cartilage matrix protein OS=Mus musculus OX=10090 GN=Matn1 PE=2 SV=2	0.021	2.28	4	2	2	1	500	54.4	7.53	3.92	2	Pf00092	17180	ENSMUSG00000040533	Matn1	mmu:17180; P51942; Q80VN5		ECM proteoglycans	1	0
Low	Q9R0G6	Cartilage oligomeric matrix protein OS=Mus musculus OX=10090 GN=Comp PE=1 SV=2	0.094	1.306	3	1	1	1	755	82.3	4.64	0	1	Pf05735	12845	ENSMUSG00000031849	Comp	G3X8Q4; mmu:12845; Q9R0G6	Focal Adhesion-PI3K-Akt-mTOR-signaling pathway	ECM proteoglycans; Integrin cell surface interactions	3	0
Low	Q08EC4	Cas scaffolding protein family member 4 OS=Mus musculus OX=10090 GN=Cass4 PE=1 SV=1	0.081	1.415	2	1	1	1	804	88.6	7.06	0	1	Pf08824, Pf12026, Pf14604	320664	ENSMUSG00000074570	Cass4	A1L397; mmu:320664; Q08EC3; Q08EC4; Q3TCH3			0	0
High	Q8BK63	Casein kinase I isoform alpha OS=Mus musculus OX=10090 GN=Csnk1a1 PE=1 SV=2	0	14.212	11	3	5	3	337	38.9	9.57	13.11	3			ENSMUSG00000024576	Csnk1a1	Q3UIL0; Q64506; Q80XI2; Q8BK63; Q99LY3		GLI3 is processed to GLI3R by the proteasome; Beta-catenin phosphorylation cascade; Disassembly of the destruction complex and recruitment of AXIN to the membrane; Activation of SMO	5	0
High	Q9DC28	Casein kinase I isoform delta OS=Mus musculus OX=10090 GN=Csnk1d PE=1 SV=2	0	6.609	7	2	3	1	415	47.3	9.74	6.2	2		104318	ENSMUSG00000025162	Csnk1d	mmu:104318; Q3TZK2; Q99KK4; Q9DC28	Wnt Signaling Pathway NetPath	Anchoring of the basal body to the plasma membrane; Regulation of PLK1 Activity at G2/M Transition; Loss of Nlp from mitotic centrosomes; Recruitment of mitotic centrosome proteins and complexes; Recruitment of NuMA to mitotic centrosomes; AURKA Activation by TPX2; Major pathway of rRNA processing in the nucleolus and cytosol; COPII-mediated vesicle transport	10	0
High	Q9JMK2	Casein kinase I isoform epsilon OS=Mus musculus OX=10090 GN=Csnk1e PE=1 SV=2	0	13.034	16	5	10	4	416	47.3	9.66	19.35	5		27373	ENSMUSG00000022433	Csnk1e	mmu:27373; Q8R389; Q9JMK2	Wnt Signaling Pathway; Wnt Signaling Pathway NetPath; Wnt Signaling Pathway and Pluripotency	Anchoring of the basal body to the plasma membrane; Regulation of PLK1 Activity at G2/M Transition; Loss of Nlp from mitotic centrosomes; Recruitment of mitotic centrosome proteins and complexes; Recruitment of NuMA to mitotic centrosomes; AURKA Activation by TPX2; Major pathway of rRNA processing in the nucleolus and cytosol; WNT mediated activation of DVL	12	1
High	Q8BTH8	Casein kinase I isoform gamma-1 OS=Mus musculus OX=10090 GN=Csnk1g1 PE=1 SV=2	0.006	3.734	5	2	4	2	459	52.7	9.01	2.04	2		214897	ENSMUSG00000032384	Csnk1g1	E9QPK6; mmu:214897; Q8BTH8			0	0
Low	Q8BVP5	Casein kinase I isoform gamma-2 OS=Mus musculus OX=10090 GN=Csnk1g2 PE=1 SV=1	0.118	1.16	2	1	2	1	415	47.6	9.06	2.15	1		103236	ENSMUSG00000003345	Csnk1g2	mmu:103236; Q8BVP5		Sphingolipid de novo biosynthesis	1	0
High	Q60737	Casein kinase II subunit alpha OS=Mus musculus OX=10090 GN=Csnk2a1 PE=1 SV=2	0	17.818	15	5	9	4	391	45.1	7.74	21.1	5		12995	ENSMUSG00000074698	Csnk2a1	mmu:12995; Q60737; Q8R0X4	TNF-alpha NF-kB Signaling Pathway; Wnt Signaling Pathway NetPath	Cooperation of PDCL (PhLP1) and TRiC/CCT in G-protein beta folding; RUNX1 interacts with co-factors whose precise effect on RUNX1 targets is not known; Regulation of TP53 Activity through Phosphorylation; Regulation of PTEN stability and activity; Signal transduction by L1; Condensation of Prometaphase Chromosomes; Synthesis of PC; WNT mediated activation of DVL; Receptor Mediated Mitophagy	11	0
High	O54833	Casein kinase II subunit alpha' OS=Mus musculus OX=10090 GN=Csnk2a2 PE=1 SV=1	0	17.308	22	6	11	5	350	41.2	8.56	16.13	6		13000	ENSMUSG00000046707	Csnk2a2	mmu:13000; O54833	TNF-alpha NF-kB Signaling Pathway; Wnt Signaling Pathway NetPath	Cooperation of PDCL (PhLP1) and TRiC/CCT in G-protein beta folding; RUNX1 interacts with co-factors whose precise effect on RUNX1 targets is not known; Regulation of TP53 Activity through Phosphorylation; Regulation of PTEN stability and activity; Signal transduction by L1; Condensation of Prometaphase Chromosomes; Synthesis of PC; WNT mediated activation of DVL; Receptor Mediated Mitophagy	11	0
High	P67871	Casein kinase II subunit beta OS=Mus musculus OX=10090 GN=Csnk2b PE=1 SV=1	0	7.356	16	2	6	2	215	24.9	5.55	11.54	2	Pf01214	13001	ENSMUSG00000024387	Csnk2b	mmu:13001; P07312; P13862; P67871; Q3TTJ7	TNF-alpha NF-kB Signaling Pathway; Wnt Signaling Pathway NetPath	Neutrophil degranulation; Cooperation of PDCL (PhLP1) and TRiC/CCT in G-protein beta folding; RUNX1 interacts with co-factors whose precise effect on RUNX1 targets is not known; Regulation of TP53 Activity through Phosphorylation; Regulation of PTEN stability and activity; Signal transduction by L1; Condensation of Prometaphase Chromosomes; Synthesis of PC; WNT mediated activation of DVL; Recepto…	12	0
High	Q6P9K8	Caskin-1 OS=Mus musculus OX=10090 GN=Caskin1 PE=1 SV=2	0	207.486	39	44	102	44	1431	150.4	9.17	278.09	44	Pf00536, Pf07653	268932	ENSMUSG00000033597	Caskin1	mmu:268932; Q6P9K8; Q6ZPU2; Q8BWU2; Q8BX99; Q9CXH0			0	0
Low	Q99KF0	Caspase recruitment domain-containing protein 14 OS=Mus musculus OX=10090 GN=Card14 PE=2 SV=2	0.061	1.618	2	2	2	2	999	113.4	6.1	0	2	Pf00619	170720	ENSMUSG00000013483	Card14	mmu:170720; Q99KF0			0	0
High	P70677	Caspase-3 OS=Mus musculus OX=10090 GN=Casp3 PE=1 SV=1	0	24.024	27	6	12	6	277	31.5	6.92	26.45	6	Pf00656	12367	ENSMUSG00000031628	Casp3	mmu:12367; O08668; P70677; Q8CHV5; Q9QWI4	Apoptosis; Oxidative Damage; Apoptosis Modulation by HSP70; PluriNetWork: mechanisms associated with pluripotency; Alzheimers Disease; Spinal Cord Injury; TNF-alpha NF-kB Signaling Pathway; Parkinsons Disease Pathway; IL-6 signaling Pathway; Alpha6-Beta4 Integrin Signaling Pathway; MAPK signaling pathway; FAS pathway and Stress induction of HSP regulation; Toll Like Receptor signaling	Apoptosis induced DNA fragmentation; Other interleukin signaling; Apoptotic cleavage of cell adhesion proteins; Pyroptosis; Caspase-mediated cleavage of cytoskeletal proteins; Activation of caspases through apoptosome-mediated cleavage; NADE modulates death signalling; SMAC, XIAP-regulated apoptotic response; Signaling by Hippo; Caspase activation via Dependence Receptors in the absence of ligand	24	0
High	P24270	Catalase OS=Mus musculus OX=10090 GN=Cat PE=1 SV=4	0	12.811	9	4	5	4	527	59.8	7.88	10.49	4	Pf00199	12359	ENSMUSG00000027187	Cat	mmu:12359; P24270; Q3TXQ6	Selenium Micronutrient Network; Folic Acid Network; Oxidative Stress; Tryptophan metabolism	Neutrophil degranulation; Detoxification of Reactive Oxygen Species; Peroxisomal protein import	7	0
High	Q8BIG7	Catechol O-methyltransferase domain-containing protein 1 OS=Mus musculus OX=10090 GN=Comtd1 PE=1 SV=1	0	6.419	10	3	7	3	262	28.9	8.32	13.1	3	Pf01596	69156	ENSMUSG00000021773	Comtd1	mmu:69156; Q8BIG7			0	0
High	O88587	Catechol O-methyltransferase OS=Mus musculus OX=10090 GN=Comt PE=1 SV=2	0.004	4.15	8	2	4	2	265	29.5	5.83	2.37	2	Pf01596	12846	ENSMUSG00000000326; ENSMUSG00000098892	Comt	mmu:12846; O88587; Q91XH4	Methylation; Metapathway biotransformation; Estrogen metabolism; Biogenic Amine Synthesis	Methylation; Enzymatic degradation of dopamine by COMT; Enzymatic degradation of Dopamine by monoamine oxidase	7	0
High	P26231	Catenin alpha-1 OS=Mus musculus OX=10090 GN=Ctnna1 PE=1 SV=1	0	28.775	13	11	23	2	906	100	6.23	46.99	11	Pf01044	12385	ENSMUSG00000037815	Ctnna1	mmu:12385; P26231	White fat cell differentiation	Myogenesis; RHO GTPases activate IQGAPs; Adherens junctions interactions; VEGFR2 mediated vascular permeability	5	0
High	Q61301	Catenin alpha-2 OS=Mus musculus OX=10090 GN=Ctnna2 PE=1 SV=3	0	135.725	44	36	71	27	953	105.2	5.71	149.82	36	Pf01044	12386	ENSMUSG00000063063	Ctnna2	mmu:12386; Q3TY37; Q61300; Q61301; Q6AXD1		Myogenesis	1	8
High	Q02248	Catenin beta-1 OS=Mus musculus OX=10090 GN=Ctnnb1 PE=1 SV=1	0	125.739	41	27	92	23	781	85.4	5.86	188.62	27		12387	ENSMUSG00000006932	Ctnnb1	mmu:12387; Q02248; Q922W1; Q9D335	TGF Beta Signaling Pathway; IL-5 Signaling Pathway; MicroRNAs in Cardiomyocyte Hypertrophy; PluriNetWork: mechanisms associated with pluripotency; Ptf1a related regulatory pathway; Heart Development; Neural Crest Differentiation; Primary Focal Segmental Glomerulosclerosis FSGS; ESC Pluripotency Pathways; Wnt Signaling in Kidney Disease; Wnt Signaling Pathway; Adipogenesis genes; Id Signaling Path…	Apoptotic cleavage of cell adhesion proteins; Adherens junctions interactions; Myogenesis; Ca2+ pathway; VEGFR2 mediated vascular permeability; RHO GTPases activate IQGAPs; Formation of the beta-catenin:TCF transactivating complex; LRR FLII-interacting protein 1 (LRRFIP1) activates type I IFN production; Deactivation of the beta-catenin transactivating complex; Beta-catenin phosphorylation cascad…	30	4
High	P30999	Catenin delta-1 OS=Mus musculus OX=10090 GN=Ctnnd1 PE=1 SV=2	0	126.701	38	34	78	33	938	104.9	6.87	165.19	34		12388	ENSMUSG00000034101; ENSMUSG00000101645	Ctnnd1	mmu:12388; P30999; Q3TSU9; Q80XQ4; Q8CHF8	EGFR1 Signaling Pathway; Wnt Signaling Pathway and Pluripotency	Adherens junctions interactions; VEGFR2 mediated vascular permeability	4	0
High	O35927	Catenin delta-2 OS=Mus musculus OX=10090 GN=Ctnnd2 PE=1 SV=1	0	172.914	37	43	123	40	1247	134.9	7.65	276.35	43		18163		Ctnnd2	B2RR80; mmu:18163; O35927			0	2
High	P10605	Cathepsin B OS=Mus musculus OX=10090 GN=Ctsb PE=1 SV=2	0	6.818	10	2	2	2	339	37.3	5.91	5.97	2	Pf00112	13030	ENSMUSG00000021939	Ctsb	mmu:13030; P10605; Q3UDW7		Neutrophil degranulation; Assembly of collagen fibrils and other multimeric structures; Collagen degradation; MHC class II antigen presentation; Trafficking and processing of endosomal TLR	5	0
High	P18242	Cathepsin D OS=Mus musculus OX=10090 GN=Ctsd PE=1 SV=1	0	17.209	23	7	13	7	410	44.9	7.15	22.26	7	Pf00026, Pf07966	13033	ENSMUSG00000007891	Ctsd	mmu:13033; P18242		MHC class II antigen presentation; Neutrophil degranulation; Collagen degradation; Metabolism of Angiotensinogen to Angiotensins	4	0
High	Q9WUU7	Cathepsin Z OS=Mus musculus OX=10090 GN=Ctsz PE=1 SV=1	0.009	3.031	10	2	2	2	306	34	6.6	0	2	Pf00112	64138	ENSMUSG00000016256	Ctsz	mmu:64138; Q9WUU7		Neutrophil degranulation; COPII-mediated vesicle transport; Cargo concentration in the ER; Metabolism of Angiotensinogen to Angiotensins; Lysosome Vesicle Biogenesis	5	0
Low	E9Q9F6	Cation channel sperm-associated protein subunit delta OS=Mus musculus OX=10090 GN=Catsperd PE=1 SV=1	0.136	1.07	2	1	1	1	805	91	7.11	0	1	Pf15020	106757	ENSMUSG00000040828	Catsperd	E7DZL7; E7DZL8; E9Q710; E9Q9F6; mmu:106757; Q1JPR3; Q1LZJ6; Q8C5U5		Sperm Motility And Taxes	1	0
Medium	C6KI89	Cation channel sperm-associated protein subunit gamma 2 OS=Mus musculus OX=10090 GN=Catsperg2 PE=1 SV=1	0.031	2.054	1	1	2	1	1145	131.3	7.06	1.88	1	Pf15064	76718	ENSMUSG00000049123	Catsperg2	C6KI89; mmu:76718		Sperm Motility And Taxes	1	0
High	P24668	Cation-dependent mannose-6-phosphate receptor OS=Mus musculus OX=10090 GN=M6pr PE=1 SV=1	0	16.854	23	4	6	4	278	31.2	5.39	20.69	4	Pf02157	17113	ENSMUSG00000007458	M6pr	mmu:17113; P24668		Cargo recognition for clathrin-mediated endocytosis; Lysosome Vesicle Biogenesis; Retrograde transport at the Trans-Golgi-Network	4	0
High	Q07113	Cation-independent mannose-6-phosphate receptor OS=Mus musculus OX=10090 GN=Igf2r PE=1 SV=1	0.007	3.595	1	1	1	1	2483	273.6	5.71	2.67	1	Pf00878	16004	ENSMUSG00000023830	Igf2r	mmu:16004; Q07113; Q61822; Q6LED1		Cargo recognition for clathrin-mediated endocytosis; Neutrophil degranulation; Golgi Associated Vesicle Biogenesis; Retrograde transport at the Trans-Golgi-Network	5	0
Medium	O54724	Caveolae-associated protein 1 OS=Mus musculus OX=10090 GN=Cavin1 PE=1 SV=1	0.023	2.215	5	1	1	1	392	43.9	5.52	2.47	1	Pf15237	19285	ENSMUSG00000004044	Cavin1	mmu:19285; O54724; Q2TAW6		RHOA GTPase cycle; RHOB GTPase cycle; RHOC GTPase cycle; RNA Polymerase I Transcription Termination	4	0
High	P49817	Caveolin-1 OS=Mus musculus OX=10090 GN=Cav1 PE=1 SV=1	0.003	4.732	10	2	5	2	178	20.5	6.02	4.9	2		12389	ENSMUSG00000007655	Cav1	mmu:12389; P49817; Q8C1X7; Q8CBP4; Q9QYH3; Q9QYH4	TNF-alpha NF-kB Signaling Pathway; EGFR1 Signaling Pathway; Integrin-mediated Cell Adhesion; Focal Adhesion	RHOA GTPase cycle; RHOB GTPase cycle; CDC42 GTPase cycle; RAC1 GTPase cycle; RND2 GTPase cycle; RAC2 GTPase cycle; RAC3 GTPase cycle; Extra-nuclear estrogen signaling; RND3 GTPase cycle; RND1 GTPase cycle; RHOF GTPase cycle; RHOD GTPase cycle; Basigin interactions; RHOQ GTPase cycle; RHOC GTPase cycle; RHOG GTPase cycle; RHOH GTPase cycle; Disassembly of the destruction complex and recruitment of…	25	0
High	Q8BHE3	Caytaxin OS=Mus musculus OX=10090 GN=Atcay PE=1 SV=1	0	20.714	30	7	11	7	372	42.2	4.68	11.62	7		16467	ENSMUSG00000034958	Atcay	mmu:16467; Q3TR94; Q8BHE3			0	0
High	Q5M8N0	CB1 cannabinoid receptor-interacting protein 1 OS=Mus musculus OX=10090 GN=Cnrip1 PE=1 SV=1	0	16.52	29	4	9	4	164	18.6	7.96	15.84	4	Pf15043	380686	ENSMUSG00000044629	Cnrip1	mmu:380686; Q3TAC7; Q3UFR2; Q5M8N0			0	0
Low	P97769	Cbp/p300-interacting transactivator 1 OS=Mus musculus OX=10090 GN=Cited1 PE=1 SV=1	0.241	0.758	8	1	1	1	203	20.8	4.68	2.01	1	Pf04487	12705	ENSMUSG00000051159	Cited1	mmu:12705; P97769		Estrogen-dependent gene expression; Activation of the TFAP2 (AP-2) family of transcription factors	2	0
Low	Q6PEE2	CBP80/20-dependent translation initiation factor OS=Mus musculus OX=10090 GN=Ctif PE=1 SV=2	0.213	0.822	3	1	2	1	600	67.8	6.65	0	1	Pf02854	269037		Ctif	mmu:269037; Q6A069; Q6PEE2			0	0
High	Q8K1J6	CCA tRNA nucleotidyltransferase 1, mitochondrial OS=Mus musculus OX=10090 GN=Trnt1 PE=1 SV=1	0	6.151	6	2	2	2	434	49.9	8.56	5.3	2	Pf01743	70047	ENSMUSG00000013736	Trnt1	mmu:70047; Q3TKW1; Q3UX99; Q8K1J6; Q920N6; Q9CSX0			0	0
High	Q6ZQ08	CCR4-NOT transcription complex subunit 1 OS=Mus musculus OX=10090 GN=Cnot1 PE=1 SV=2	0	43.569	9	16	22	16	2375	266.6	7.11	47.51	16	Pf04054	234594	ENSMUSG00000036550	Cnot1	B2RY28; mmu:234594; Q3UPB7; Q6ZQ08; Q8BSB4; Q8BXB2; Q8C0H2; Q8K3D8		Deadenylation of mRNA; TP53 regulates transcription of additional cell cycle genes whose exact role in the p53 pathway remain uncertain	2	0
High	Q8BH15	CCR4-NOT transcription complex subunit 10 OS=Mus musculus OX=10090 GN=Cnot10 PE=1 SV=1	0	7.255	3	1	1	1	744	81.8	7.68	4.36	1		78893	ENSMUSG00000056167	Cnot10	mmu:78893; Q05CH8; Q3TSS4; Q3UDS5; Q80VN2; Q8BH15; Q8CI74		Deadenylation of mRNA; TP53 regulates transcription of additional cell cycle genes whose exact role in the p53 pathway remain uncertain	2	0
Low	Q9CWN7	CCR4-NOT transcription complex subunit 11 OS=Mus musculus OX=10090 GN=Cnot11 PE=1 SV=1	0.174	0.927	4	1	1	1	505	54.9	6.55	0	1	Pf10155	52846	ENSMUSG00000003135	Cnot11	mmu:52846; Q3TJG9; Q9CWN7		Deadenylation of mRNA; TP53 regulates transcription of additional cell cycle genes whose exact role in the p53 pathway remain uncertain	2	0
Medium	Q8C5L3	CCR4-NOT transcription complex subunit 2 OS=Mus musculus OX=10090 GN=Cnot2 PE=1 SV=2	0.022	2.234	2	1	2	1	540	59.7	7.66	1.86	1	Pf04153	72068	ENSMUSG00000020166	Cnot2	mmu:72068; Q3UE39; Q80YA5; Q8C5L3; Q9D0P1		Deadenylation of mRNA; TP53 regulates transcription of additional cell cycle genes whose exact role in the p53 pathway remain uncertain	2	0
High	Q8K0V4	CCR4-NOT transcription complex subunit 3 OS=Mus musculus OX=10090 GN=Cnot3 PE=1 SV=1	0.005	3.907	5	4	5	4	751	81.9	6.2	5.74	4	Pf04065, Pf04153	232791	ENSMUSG00000035632	Cnot3	B2RUA7; mmu:232791; Q8K0V4		Deadenylation of mRNA; TP53 regulates transcription of additional cell cycle genes whose exact role in the p53 pathway remain uncertain	2	0
High	Q8BT14	CCR4-NOT transcription complex subunit 4 OS=Mus musculus OX=10090 GN=Cnot4 PE=1 SV=2	0	6.737	6	2	4	2	575	63.4	7.03	8.83	2	Pf00076, Pf14570	53621	ENSMUSG00000038784	Cnot4	mmu:53621; Q8BT14; Q8CCR4; Q9CV74; Q9Z1D0	mRNA processing	Deadenylation of mRNA; TP53 regulates transcription of additional cell cycle genes whose exact role in the p53 pathway remain uncertain	3	0
High	Q61490	CD166 antigen OS=Mus musculus OX=10090 GN=Alcam PE=1 SV=3	0	42.467	24	11	23	11	583	65.1	6.15	47.55	11	Pf08205, Pf13927	11658	ENSMUSG00000022636	Alcam	mmu:11658; O70136; Q61490; Q8CDA5; Q8R2T0			0	0
Low	Q91ZW9	CD209 antigen-like protein C OS=Mus musculus OX=10090 GN=Cd209c PE=2 SV=1	0.105	1.238	6	1	1	1	178	21.2	8.43	2.07	1		170776	ENSMUSG00000040165	Cd209c	mmu:170776; Q0VB37; Q91ZW9			0	0
Low	P41731	CD63 antigen OS=Mus musculus OX=10090 GN=Cd63 PE=1 SV=2	0.21	0.825	3	1	1	1	238	25.7	6.98	0	1	Pf00335	12512	ENSMUSG00000025351	Cd63	mmu:12512; P41731		Neutrophil degranulation; Platelet degranulation	2	0
High	P35762	CD81 antigen OS=Mus musculus OX=10090 GN=Cd81 PE=1 SV=2	0	25.601	12	2	13	2	236	25.8	5.83	50.72	2	Pf00335	12520	ENSMUSG00000037706	Cd81	mmu:12520; P35762; Q91V78		Immunoregulatory interactions between a Lymphoid and a non-Lymphoid cell; Regulation of Complement cascade	2	0
High	Q8BIF0	CD99 antigen-like protein 2 OS=Mus musculus OX=10090 GN=Cd99l2 PE=1 SV=1	0	8.296	14	2	3	2	237	25.4	4.86	6.18	2	Pf12301	171486	ENSMUSG00000035776	Cd99l2	A2AP77; mmu:171486; Q8BIF0; Q8R447			0	0
High	Q9JM96	Cdc42 effector protein 4 OS=Mus musculus OX=10090 GN=Cdc42ep4 PE=1 SV=1	0	17.048	12	3	7	3	349	37.8	5.36	16.32	3	Pf14957	56699	ENSMUSG00000041598	Cdc42ep4	mmu:56699; Q3TNF3; Q9JM96; Q9QZT8		CDC42 GTPase cycle; RAC1 GTPase cycle; RAC2 GTPase cycle; RHOQ GTPase cycle	4	0
High	Q91WS0	CDGSH iron-sulfur domain-containing protein 1 OS=Mus musculus OX=10090 GN=Cisd1 PE=1 SV=1	0	25.079	48	6	18	6	108	12.1	9.06	27.48	6	Pf09360	52637	ENSMUSG00000037710	Cisd1	mmu:52637; Q3V2I3; Q8WUQ5; Q91WS0	Adipogenesis genes		1	0
High	Q9CQB5	CDGSH iron-sulfur domain-containing protein 2 OS=Mus musculus OX=10090 GN=Cisd2 PE=1 SV=1	0	11.319	33	5	7	5	135	15.2	9.51	7.26	5	Pf09360	67006	ENSMUSG00000028165	Cisd2	mmu:67006; Q9CQB5; Q9D0Y0			0	0
Medium	B1AR13	CDGSH iron-sulfur domain-containing protein 3, mitochondrial OS=Mus musculus OX=10090 GN=Cisd3 PE=1 SV=1	0.038	1.926	10	2	2	2	137	15.7	9.79	0	2	Pf09360	217149	ENSMUSG00000078695	Cisd3	B1AR11; B1AR12; B1AR13; mmu:217149			0	0
Medium	Q99LM2	CDK5 regulatory subunit-associated protein 3 OS=Mus musculus OX=10090 GN=Cdk5rap3 PE=1 SV=1	0.016	2.438	3	1	2	1	503	57	4.83	0	1		80280	ENSMUSG00000018669	Cdk5rap3	mmu:80280; Q3UE41; Q99LM2			0	0
High	Q8BI72	CDKN2A-interacting protein OS=Mus musculus OX=10090 GN=Cdkn2aip PE=1 SV=1	0.009	3.416	4	2	2	2	563	59.7	9.16	2.09	2		70925	ENSMUSG00000038069	Cdkn2aip	mmu:70925; Q8BI72			0	0
High	Q8BHF7	CDP-diacylglycerol--glycerol-3-phosphate 3-phosphatidyltransferase, mitochondrial OS=Mus musculus OX=10090 GN=Pgs1 PE=1 SV=1	0.002	5.133	3	1	1	1	553	62.5	8.9	4.28	1		74451	ENSMUSG00000017715	Pgs1	mmu:74451; Q8BHF7; Q8QZT9; Q8R4R7	Eicosanoid Lipid Synthesis Map		1	0
Medium	Q8VDP6	CDP-diacylglycerol--inositol 3-phosphatidyltransferase OS=Mus musculus OX=10090 GN=Cdipt PE=1 SV=1	0.031	2.057	8	2	2	2	213	23.6	8.27	0	2	Pf01066	52858	ENSMUSG00000030682	Cdipt	mmu:52858; Q8VDP6	Glycerolipids and Glycerophospholipids	Synthesis of PI	2	0
High	Q8R5M8	Cell adhesion molecule 1 OS=Mus musculus OX=10090 GN=Cadm1 PE=1 SV=2	0	19.953	23	6	8	6	456	49.8	5.03	17.53	6	Pf08205, Pf13927	54725	ENSMUSG00000032076	Cadm1	mmu:54725; Q6F3J3; Q7TNL1; Q80VG4; Q8K3T6; Q8R4L1; Q8R5M8; Q9QYL5; Q9QYL6; Q9Z2H8	Splicing factor NOVA regulated synaptic proteins	Nectin/Necl trans heterodimerization	3	0
High	Q8BLQ9	Cell adhesion molecule 2 OS=Mus musculus OX=10090 GN=Cadm2 PE=1 SV=2	0	60.573	31	14	29	14	435	47.5	5.41	79.03	14	Pf08205, Pf13927	239857	ENSMUSG00000064115	Cadm2	B1B1A5; B1B1A6; B2RTL0; mmu:239857; Q8BLQ9; Q8BXJ7; Q8BYP1; Q8BZP4		Adherens junctions interactions	1	0
High	Q99N28	Cell adhesion molecule 3 OS=Mus musculus OX=10090 GN=Cadm3 PE=1 SV=1	0	68.492	34	10	35	10	396	42.9	5.8	102.89	10	Pf08205, Pf13927	94332	ENSMUSG00000005338	Cadm3	mmu:94332; Q8BSQ8; Q8K1H8; Q99N28	Splicing factor NOVA regulated synaptic proteins	Nectin/Necl trans heterodimerization	3	0
High	Q8R464	Cell adhesion molecule 4 OS=Mus musculus OX=10090 GN=Cadm4 PE=1 SV=1	0	19.758	20	5	9	5	388	42.7	6.3	23.08	5	Pf08205, Pf13927	260299	ENSMUSG00000054793	Cadm4	mmu:260299; Q8R464			0	0
High	Q8VDP4	Cell cycle and apoptosis regulator protein 2 OS=Mus musculus OX=10090 GN=Ccar2 PE=1 SV=2	0	38.262	20	12	16	12	922	102.9	5.25	36.79	12	Pf14444	219158	ENSMUSG00000033712	Ccar2	mmu:219158; Q6PIB1; Q8BWR5; Q8C0F0; Q8R3G6; Q8VDP4	TNF-alpha NF-kB Signaling Pathway	Regulation of HSF1-mediated heat shock response	2	0
Medium	Q8VEK0	Cell cycle control protein 50A OS=Mus musculus OX=10090 GN=Tmem30a PE=1 SV=1	0.016	2.476	5	2	4	2	364	41	8.37	3.3	2		69981	ENSMUSG00000032328	Tmem30a	mmu:69981; Q3TCJ5; Q3UDH8; Q8R0X6; Q8VEH1; Q8VEK0		Neutrophil degranulation	1	0
High	Q9JKC6	Cell cycle exit and neuronal differentiation protein 1 OS=Mus musculus OX=10090 GN=Cend1 PE=1 SV=1	0	52.357	50	10	22	10	149	15	8.97	47.04	10	Pf15677	57754	ENSMUSG00000060240	Cend1	mmu:57754; Q9DBA0; Q9JKC6			0	0
High	Q9DB75	Cell death-inducing p53-target protein 1 OS=Mus musculus OX=10090 GN=Cdip1 PE=2 SV=1	0.003	4.475	8	2	3	2	208	21.8	5.66	5.05	2		66626	ENSMUSG00000004071	Cdip1	mmu:66626; Q3UD73; Q9CYP1; Q9DB75			0	0
High	P60766	Cell division control protein 42 homolog OS=Mus musculus OX=10090 GN=Cdc42 PE=1 SV=2	0	37.474	36	6	19	5	191	21.2	6.55	45.82	6		12540	ENSMUSG00000006699	Cdc42	A2A9U6; mmu:12540; P21181; P25763; P60766; Q3THZ7; Q3TJK6; Q545V0; Q6P201; Q8BQ51	Oxidative Damage; Chemokine signaling pathway; G13 Signaling Pathway; p38 MAPK Signaling Pathway; IL-3 Signaling Pathway; MAPK signaling pathway; Regulation of Actin Cytoskeleton; EGFR1 Signaling Pathway; Integrin-mediated Cell Adhesion; Focal Adhesion	RAC1 GTPase cycle; EPHB-mediated forward signaling; MAPK6/MAPK4 signaling; RHOG GTPase cycle; CDC42 GTPase cycle; RAC2 GTPase cycle; RAC3 GTPase cycle; DCC mediated attractive signaling; RHO GTPases Activate Formins; RHOU GTPase cycle; RHOV GTPase cycle; VEGFA-VEGFR2 Pathway; EGFR downregulation; Regulation of actin dynamics for phagocytic cup formation; Factors involved in megakaryocyte developm…	34	0
High	Q6A068	Cell division cycle 5-like protein OS=Mus musculus OX=10090 GN=Cdc5l PE=1 SV=2	0	10.204	6	4	6	4	802	92.1	8.02	14.18	4		71702	ENSMUSG00000023932	Cdc5l	mmu:71702; Q6A068; Q8K1J9		mRNA Splicing - Major Pathway	1	0
High	Q8CH18	Cell division cycle and apoptosis regulator protein 1 OS=Mus musculus OX=10090 GN=Ccar1 PE=1 SV=1	0.002	5.195	3	3	7	3	1146	132	5.76	10.74	3	Pf02037, Pf14444	67500	ENSMUSG00000020074	Ccar1	mmu:67500; Q05BR1; Q05DK6; Q6AXC9; Q6PAR2; Q80XE4; Q8BJY0; Q8BVN2; Q8CGG1; Q8CH18; Q9CSR5		mRNA Splicing - Major Pathway	1	0
Low	Q8R349	Cell division cycle protein 16 homolog OS=Mus musculus OX=10090 GN=Cdc16 PE=1 SV=1	0.215	0.817	2	1	2	1	620	71.4	5.76	1.9	1	Pf12895, Pf13424	69957	ENSMUSG00000038416	Cdc16	mmu:69957; Q8R349; Q9CYX9		Antigen processing: Ubiquitination & Proteasome degradation; Autodegradation of Cdh1 by Cdh1:APC/C; APC/C:Cdc20 mediated degradation of Securin; APC/C:Cdh1 mediated degradation of Cdc20 and other APC/C:Cdh1 targeted proteins in late mitosis/early G1; Cdc20:Phospho-APC/C mediated degradation of Cyclin A; Separation of Sister Chromatids; CDK-mediated phosphorylation and removal of Cdc6; APC/C:Cdc20…	15	0
High	Q8BGZ4	Cell division cycle protein 23 homolog OS=Mus musculus OX=10090 GN=Cdc23 PE=1 SV=2	0	8.983	6	4	5	4	597	68.5	7.18	10.48	4	Pf13181, Pf13414	52563		Cdc23	mmu:52563; Q6PD06; Q8BGZ4; Q8C0F1		Antigen processing: Ubiquitination & Proteasome degradation; Autodegradation of Cdh1 by Cdh1:APC/C; APC/C:Cdc20 mediated degradation of Securin; APC/C:Cdh1 mediated degradation of Cdc20 and other APC/C:Cdh1 targeted proteins in late mitosis/early G1; Cdc20:Phospho-APC/C mediated degradation of Cyclin A; Separation of Sister Chromatids; CDK-mediated phosphorylation and removal of Cdc6; APC/C:Cdc20…	15	0
High	A2A6Q5	Cell division cycle protein 27 homolog OS=Mus musculus OX=10090 GN=Cdc27 PE=1 SV=1	0	6.221	2	1	5	1	825	91.8	7.02	18.83	1	Pf00515, Pf12895, Pf13181	217232	ENSMUSG00000020687	Cdc27	A2A6Q5; A2A6Q6; B2RXS0; mmu:217232		Antigen processing: Ubiquitination & Proteasome degradation; Inactivation of APC/C via direct inhibition of the APC/C complex; APC/C:Cdc20 mediated degradation of Cyclin B; Autodegradation of Cdh1 by Cdh1:APC/C; APC/C:Cdc20 mediated degradation of Securin; APC/C:Cdh1 mediated degradation of Cdc20 and other APC/C:Cdh1 targeted proteins in late mitosis/early G1; Cdc20:Phospho-APC/C mediated degrada…	15	0
Low	Q922M5	Cell division cycle-associated 7-like protein OS=Mus musculus OX=10090 GN=Cdca7l PE=1 SV=1	0.185	0.893	1	1	1	1	438	50.2	7.65	0	1		217946	ENSMUSG00000021175	Cdca7l	mmu:217946; Q922M5	SIDS Susceptibility Pathways		1	0
Medium	Q8R2Y2	Cell surface glycoprotein MUC18 OS=Mus musculus OX=10090 GN=Mcam PE=1 SV=1	0.016	2.438	2	1	1	1	648	71.5	5.83	2.46	1	Pf07686, Pf08205, Pf13927	84004	ENSMUSG00000032135	Mcam	mmu:84004; Q8R2Y2; Q9EPF1; Q9ESS7; Q9JHQ2; Q9JHQ3		RAC1 GTPase cycle; RHOG GTPase cycle; RAC2 GTPase cycle; RAC3 GTPase cycle; RHOD GTPase cycle; RHOA GTPase cycle; RHOB GTPase cycle; RHOC GTPase cycle; RHOF GTPase cycle	9	0
High	P53996	Cellular nucleic acid-binding protein OS=Mus musculus OX=10090 GN=Cnbp PE=1 SV=2	0	15.104	24	4	6	4	178	19.6	7.58	18.42	4		12785	ENSMUSG00000030057	Cnbp	mmu:12785; P53996; Q80Y06; Q8BP23			0	0
High	P62965	Cellular retinoic acid-binding protein 1 OS=Mus musculus OX=10090 GN=Crabp1 PE=1 SV=2	0	25.544	42	6	10	6	137	15.6	5.38	23.46	6	Pf00061	12903	ENSMUSG00000032291	Crabp1	mmu:12903; P02695; P02697; P15780; P62965; Q3UN78	Retinol metabolism	RA biosynthesis pathway	2	0
Low	P22935	Cellular retinoic acid-binding protein 2 OS=Mus musculus OX=10090 GN=Crabp2 PE=2 SV=2	0.113	1.193	6	1	1	1	138	15.7	5.71	0	1	Pf00061	12904	ENSMUSG00000004885	Crabp2	mmu:12904; P22935	Retinol metabolism	Signaling by Retinoic Acid	2	0
Medium	Q7TSH4	Centriolar coiled-coil protein of 110 kDa OS=Mus musculus OX=10090 GN=Ccp110 PE=1 SV=1	0.044	1.85	3	2	3	2	1004	111.1	8.85	2.02	2	Pf16025	101565	ENSMUSG00000033904	Ccp110	mmu:101565; Q6A072; Q7TSH4		Ub-specific processing proteases; Anchoring of the basal body to the plasma membrane; Regulation of PLK1 Activity at G2/M Transition; Loss of Nlp from mitotic centrosomes; Recruitment of mitotic centrosome proteins and complexes; Recruitment of NuMA to mitotic centrosomes; AURKA Activation by TPX2; RHOV GTPase cycle	9	0
High	Q8QZT2	Centriole, cilia and spindle-associated protein OS=Mus musculus OX=10090 GN=Ccsap PE=1 SV=1	0.009	3.245	5	1	3	1	252	28.4	9.22	4.75	1	Pf15748	73420	ENSMUSG00000031971	Ccsap	mmu:73420; Q8C3E1; Q8QZT2			0	0
Low	P49452	Centromere protein C OS=Mus musculus OX=10090 GN=Cenpc PE=1 SV=2	0.229	0.784	1	1	1	1	906	102.1	9.67	0	1	Pf11699, Pf15620, Pf15622	12617	ENSMUSG00000029253	Cenpc	B9EK81; mmu:12617; P49452		Separation of Sister Chromatids; Amplification of signal from unattached kinetochores via a MAD2 inhibitory signal; Resolution of Sister Chromatid Cohesion; RHO GTPases Activate Formins; EML4 and NUDC in mitotic spindle formation; Deposition of new CENPA-containing nucleosomes at the centromere	7	0
High	Q9CXS4	Centromere protein V OS=Mus musculus OX=10090 GN=Cenpv PE=1 SV=2	0	30.221	33	5	15	5	252	27.5	9.79	47.65	5	Pf04828	73139	ENSMUSG00000018509	Cenpv	B2RWK8; B9EK22; mmu:73139; Q5SX21; Q6PIA5; Q9CXS4			0	0
Medium	Q5PR68	Centrosomal protein of 112 kDa OS=Mus musculus OX=10090 GN=Cep112 PE=2 SV=2	0.01	2.864	3	2	2	2	954	112.6	6.8	2.2	2		76380	ENSMUSG00000020728	Cep112	mmu:76380; Q5PR68; Q80ZN6; Q99JS4; Q9D9T1			0	0
Low	Q8BI22	Centrosomal protein of 128 kDa OS=Mus musculus OX=10090 GN=Cep128 PE=1 SV=2	0.055	1.683	2	2	2	1	1102	128.4	6.52	0	2		75216	ENSMUSG00000061533	Cep128	mmu:75216; Q8BI22			0	0
High	Q62036	Centrosomal protein of 131 kDa OS=Mus musculus OX=10090 GN=Cep131 PE=1 SV=2	0	8.961	5	4	4	4	1060	120.2	8.72	2.9	4		12009	ENSMUSG00000039781	Cep131	B1AXJ0; mmu:12009; Q62036		Anchoring of the basal body to the plasma membrane; Regulation of PLK1 Activity at G2/M Transition; Loss of Nlp from mitotic centrosomes; Recruitment of mitotic centrosome proteins and complexes; Recruitment of NuMA to mitotic centrosomes; AURKA Activation by TPX2	7	0
Medium	Q6P5D4	Centrosomal protein of 135 kDa OS=Mus musculus OX=10090 GN=Cep135 PE=1 SV=1	0.017	2.418	2	3	4	1	1140	133.3	6.48	2.09	3		381644	ENSMUSG00000036403	Cep135	mmu:381644; Q6A030; Q6P5D4		Anchoring of the basal body to the plasma membrane; Regulation of PLK1 Activity at G2/M Transition; Loss of Nlp from mitotic centrosomes; Recruitment of mitotic centrosome proteins and complexes; Recruitment of NuMA to mitotic centrosomes; AURKA Activation by TPX2	7	0
Low	A2AUM9	Centrosomal protein of 152 kDa OS=Mus musculus OX=10090 GN=Cep152 PE=1 SV=1	0.263	0.708	1	1	1	1	1736	196.4	5.66	0	1		99100	ENSMUSG00000068394	Cep152	A2AUM9; mmu:99100; Q69ZV8; Q8R0X1		Anchoring of the basal body to the plasma membrane; Regulation of PLK1 Activity at G2/M Transition; Loss of Nlp from mitotic centrosomes; Recruitment of mitotic centrosome proteins and complexes; Recruitment of NuMA to mitotic centrosomes; AURKA Activation by TPX2	7	0
Low	Q5DU05	Centrosomal protein of 164 kDa OS=Mus musculus OX=10090 GN=Cep164 PE=1 SV=2	0.263	0.708	2	1	1	1	1446	162.5	5.31	0	1				Cep164	Q3TYF9; Q5DU05; Q6NZG6; Q8BQD2; Q8BSI0		Recruitment of NuMA to mitotic centrosomes; Recruitment of mitotic centrosome proteins and complexes; Anchoring of the basal body to the plasma membrane; Regulation of PLK1 Activity at G2/M Transition; Loss of Nlp from mitotic centrosomes; AURKA Activation by TPX2	7	0
High	Q6A065	Centrosomal protein of 170 kDa OS=Mus musculus OX=10090 GN=Cep170 PE=1 SV=2	0	221.72	40	59	148	56	1588	174.9	7.17	322.66	59	Pf00498, Pf15308	545389	ENSMUSG00000057335	Cep170	Q6A065; Q7TQD9; Q8BJW2; Q9D3Z0			0	0
High	Q80U49	Centrosomal protein of 170 kDa protein B OS=Mus musculus OX=10090 GN=Cep170b PE=1 SV=2	0	220.255	46	64	151	61	1574	170.7	6.87	290.96	64	Pf15308	217882	ENSMUSG00000072825; ENSMUSG00000115972	Cep170b	mmu:217882; Q3UH33; Q3UHG1; Q80U49; Q80UM2			0	3
Medium	Q6A078	Centrosomal protein of 290 kDa OS=Mus musculus OX=10090 GN=Cep290 PE=1 SV=2	0.027	2.131	0	2	2	1	2472	288.9	6.1	1.68	2		216274	ENSMUSG00000019971	Cep290	mmu:216274; Q6A078; Q8BIB8		Neutrophil degranulation; Anchoring of the basal body to the plasma membrane; Regulation of PLK1 Activity at G2/M Transition; Loss of Nlp from mitotic centrosomes; Recruitment of mitotic centrosome proteins and complexes; Recruitment of NuMA to mitotic centrosomes; AURKA Activation by TPX2	8	0
High	Q99NF3	Centrosomal protein of 41 kDa OS=Mus musculus OX=10090 GN=Cep41 PE=1 SV=1	0	12.276	12	3	6	3	373	41.4	8.12	15.11	3	Pf00581	83922	ENSMUSG00000029790	Cep41	D3Z3U1; F7CSA6; mmu:83922; Q3TTB5; Q8BT53; Q99NF3		Recruitment of NuMA to mitotic centrosomes; Recruitment of mitotic centrosome proteins and complexes; Anchoring of the basal body to the plasma membrane; Regulation of PLK1 Activity at G2/M Transition; Loss of Nlp from mitotic centrosomes; AURKA Activation by TPX2	7	0
High	Q9CZ62	Centrosomal protein of 97 kDa OS=Mus musculus OX=10090 GN=Cep97 PE=1 SV=1	0.001	5.734	2	1	2	1	856	94.6	5	7.64	1	Pf14580	74201	ENSMUSG00000022604	Cep97	mmu:74201; Q8BL35; Q9CZ62		Anchoring of the basal body to the plasma membrane; RHOV GTPase cycle	2	0
Low	E9Q309	Centrosome-associated protein 350 OS=Mus musculus OX=10090 GN=Cep350 PE=1 SV=1	0.243	0.753	0	1	1	1	3095	346.2	6.35	0	1	Pf01302	74081	ENSMUSG00000033671	Cep350	A0A1D5RMJ4; D3YTP2; E9Q309; mmu:74081; Q6A062; Q8BXM7			0	0
Low	P27545	Ceramide synthase 1 OS=Mus musculus OX=10090 GN=Cers1 PE=1 SV=1	0.127	1.111	5	1	1	1	350	40.1	8.38	0	1		93898	ENSMUSG00000087408	Cers1	mmu:93898; P27545		Sphingolipid de novo biosynthesis	1	0
Medium	Q8C172	Ceramide synthase 6 OS=Mus musculus OX=10090 GN=Cers6 PE=1 SV=1	0.031	2.05	3	1	1	1	384	44.8	7.64	0	1	Pf00046	241447	ENSMUSG00000027035	Cers6	mmu:241447; Q3U817; Q8BV12; Q8C172	Sphingolipid Metabolism (general overview)	Sphingolipid de novo biosynthesis	2	0
High	Q9EQG9	Ceramide transfer protein OS=Mus musculus OX=10090 GN=Cert PE=1 SV=1	0.004	4.158	3	2	2	2	624	71.1	5.44	4.79	2		68018	ENSMUSG00000021669	Cert1	mmu:68018; Q3TQF6; Q8BNN8; Q8C8H3; Q8CAR3; Q91WB1; Q9CU52; Q9EQG8; Q9EQG9		Sphingolipid de novo biosynthesis	1	0
Low	Q8VCC6	Cerebral cavernous malformations 2 protein-like OS=Mus musculus OX=10090 GN=Ccm2l PE=2 SV=2	0.176	0.92	1	1	2	1	481	52.1	9.19	0	1		228788	ENSMUSG00000027474	Ccm2l	mmu:228788; Q8VCC6			0	0
High	Q8K2Y9	Cerebral cavernous malformations protein 2 homolog OS=Mus musculus OX=10090 GN=Ccm2 PE=1 SV=1	0.009	3.164	6	2	3	2	453	49.9	5.62	4.24	2		216527	ENSMUSG00000000378	Ccm2	mmu:216527; Q5SUA3; Q8K2Y9			0	0
High	Q922S4	cGMP-dependent 3',5'-cyclic phosphodiesterase OS=Mus musculus OX=10090 GN=Pde2a PE=1 SV=4	0	97.405	32	25	64	25	939	105.6	5.41	145.43	25	Pf01590, Pf13185	207728	ENSMUSG00000110195	Pde2a	mmu:207728; Q3TCR8; Q3TXZ6; Q8K2U1; Q922S4	Purine metabolism	G alpha (s) signalling events; cGMP effects	3	0
High	Q921W0	Charged multivesicular body protein 1a OS=Mus musculus OX=10090 GN=Chmp1a PE=1 SV=1	0.004	4.156	8	2	3	2	196	21.6	8.06	1.92	2		234852	ENSMUSG00000000743	Chmp1a	mmu:234852; Q3TW57; Q921W0			0	0
Medium	Q99LU0	Charged multivesicular body protein 1b-1 OS=Mus musculus OX=10090 GN=Chmp1b1 PE=1 SV=1	0.028	2.119	7	2	5	1	199	22.1	8.1	7.42	2		67064	ENSMUSG00000109901	Chmp1b1	mmu:67064; Q3UB77; Q99LU0; Q9CXR5			0	1
Medium	Q9CQD4	Charged multivesicular body protein 1b-2 OS=Mus musculus OX=10090 GN=Chmp1b2 PE=2 SV=2	0.029	2.099	7	2	4	1	199	22.1	8.1	5.34	2		67028	ENSMUSG00000031242	Chmp1b2	B1ATX3; mmu:67028; Q9CQD4			0	0
High	Q9DB34	Charged multivesicular body protein 2a OS=Mus musculus OX=10090 GN=Chmp2a PE=1 SV=1	0	13.219	9	2	2	2	222	25.1	5.97	8.96	2		68953	ENSMUSG00000033916	Chmp2a	mmu:68953; Q9DB34		Macroautophagy; Sealing of the nuclear envelope (NE) by ESCRT-III; Pyroptosis; Endosomal Sorting Complex Required For Transport (ESCRT); Lysosome Vesicle Biogenesis	5	0
Low	Q8BJF9	Charged multivesicular body protein 2b OS=Mus musculus OX=10090 GN=Chmp2b PE=1 SV=1	0.099	1.28	3	1	1	1	213	23.9	8.78	2.15	1		68942	ENSMUSG00000004843	Chmp2b	mmu:68942; Q80UZ4; Q8BJF9; Q9CT65		Macroautophagy; Endosomal Sorting Complex Required For Transport (ESCRT); Sealing of the nuclear envelope (NE) by ESCRT-III; Pyroptosis	4	0
Low	Q9CQ10	Charged multivesicular body protein 3 OS=Mus musculus OX=10090 GN=Chmp3 PE=1 SV=3	0.133	1.079	4	1	1	1	224	25.2	5.06	0	1		66700	ENSMUSG00000053119	Chmp3	mmu:66700; Q9CQ10; Q9D2Z2; Q9D7A5		Macroautophagy; Pyroptosis; Endosomal Sorting Complex Required For Transport (ESCRT); Sealing of the nuclear envelope (NE) by ESCRT-III	4	0
High	Q9D8B3	Charged multivesicular body protein 4b OS=Mus musculus OX=10090 GN=Chmp4b PE=1 SV=2	0	12.646	14	3	6	3	224	24.9	4.82	13.38	3		75608	ENSMUSG00000038467	Chmp4b	A2AVM1; mmu:75608; Q3TXM7; Q91VM7; Q922P1; Q9D8B3		Sealing of the nuclear envelope (NE) by ESCRT-III; Endosomal Sorting Complex Required For Transport (ESCRT); Pyroptosis; Macroautophagy	4	0
High	Q9D7S9	Charged multivesicular body protein 5 OS=Mus musculus OX=10090 GN=Chmp5 PE=1 SV=1	0	9.851	21	4	9	4	219	24.6	4.79	18.1	4		76959	ENSMUSG00000028419	Chmp5	mmu:76959; Q3UI64; Q9D7S9		Endosomal Sorting Complex Required For Transport (ESCRT)	1	0
High	P0C0A3	Charged multivesicular body protein 6 OS=Mus musculus OX=10090 GN=Chmp6 PE=1 SV=2	0	5.892	10	2	3	2	200	23.4	5.44	8.6	2		208092	ENSMUSG00000025371	Chmp6	mmu:208092; P0C0A3		Macroautophagy; Sealing of the nuclear envelope (NE) by ESCRT-III; Pyroptosis; Endosomal Sorting Complex Required For Transport (ESCRT)	4	0
Medium	Q8R1T1	Charged multivesicular body protein 7 OS=Mus musculus OX=10090 GN=Chmp7 PE=1 SV=1	0.016	2.474	8	2	2	2	451	50.6	5.22	3.12	2		105513	ENSMUSG00000034190	Chmp7	mmu:105513; Q8CFW4; Q8R1T1		Sealing of the nuclear envelope (NE) by ESCRT-III; Macroautophagy; Endosomal Sorting Complex Required For Transport (ESCRT); Pyroptosis	4	0
Low	Q922Q9	Chitinase domain-containing protein 1 OS=Mus musculus OX=10090 GN=Chid1 PE=1 SV=1	0.086	1.369	2	1	1	1	393	44.9	7.97	0	1	Pf00704	68038	ENSMUSG00000025512	Chid1	mmu:68038; Q3TVF7; Q6P8U4; Q8C7C5; Q922Q9; Q9CXR7		Platelet degranulation	1	0
High	Q921Q3	Chitobiosyldiphosphodolichol beta-mannosyltransferase OS=Mus musculus OX=10090 GN=Alg1 PE=1 SV=3	0.002	5.218	6	2	3	2	482	54.4	8.37	5.25	2	Pf00534	208211	ENSMUSG00000039427	Alg1	mmu:208211; Q3UKT8; Q921Q3		Biosynthesis of the N-glycan precursor (dolichol lipid-linked oligosaccharide, LLO) and transfer to a nascent protein	1	0
High	Q99LI2	Chloride channel CLIC-like protein 1 OS=Mus musculus OX=10090 GN=Clcc1 PE=1 SV=1	0.002	5.236	7	3	4	3	539	60.6	5.68	2.85	3		229725	ENSMUSG00000027884	Clcc1	A2AEK9; mmu:229725; Q99LI2			0	0
Low	Q9WUB6	Chloride channel protein ClC-Kb OS=Mus musculus OX=10090 GN=Clcnkb PE=1 SV=2	0.254	0.726	2	1	1	1	687	75	7.72	0	1	Pf00571, Pf00654	56365	ENSMUSG00000006216	Clcnkb	A2ADB6; mmu:56365; Q8VCF8; Q9WUB6		Stimuli-sensing channels	1	0
High	Q9Z1Q5	Chloride intracellular channel protein 1 OS=Mus musculus OX=10090 GN=Clic1 PE=1 SV=3	0.002	5.148	10	2	2	2	241	27	5.17	2.13	2		114584	ENSMUSG00000007041	Clic1	mmu:114584; Q9Z1Q5			0	0
High	Q9QYB1	Chloride intracellular channel protein 4 OS=Mus musculus OX=10090 GN=Clic4 PE=1 SV=3	0.002	4.97	9	1	1	1	253	28.7	5.59	3.16	1		29876	ENSMUSG00000037242	Clic4	mmu:29876; Q8BMG5; Q9QYB1			0	0
High	O35454	Chloride transport protein 6 OS=Mus musculus OX=10090 GN=Clcn6 PE=1 SV=1	0.009	3.045	2	1	2	1	870	96.9	7.02	5.53	1	Pf00571, Pf00654	26372	ENSMUSG00000029016	Clcn6	mmu:26372; O35454		Stimuli-sensing channels	1	0
High	Q9WVK8	Cholesterol 24-hydroxylase OS=Mus musculus OX=10090 GN=Cyp46a1 PE=1 SV=1	0	46.46	22	11	22	11	500	56.8	8.82	57.55	11		13116	ENSMUSG00000021259	Cyp46a1	mmu:13116; Q9WVK8	Metapathway biotransformation; Oxidation by Cytochrome P450; Cholesterol metabolism (includes both Bloch and Kandutsch-Russell pathways)	Synthesis of bile acids and bile salts via 24-hydroxycholesterol; Endogenous sterols	5	0
Low	Q03059	Choline O-acetyltransferase OS=Mus musculus OX=10090 GN=Chat PE=2 SV=2	0.205	0.84	3	1	1	1	641	71.8	7.74	2.91	1	Pf00755			Chat	Q03059		Acetylcholine Neurotransmitter Release Cycle; Synthesis of PC	2	0
High	Q6X893	Choline transporter-like protein 1 OS=Mus musculus OX=10090 GN=Slc44a1 PE=1 SV=3	0	6.921	6	4	4	4	653	73	8.75	4.44	4	Pf04515	100434	ENSMUSG00000028412	Slc44a1	mmu:100434; Q14DK0; Q6X893; Q6X894; Q8R0Y4; Q91Z29		Choline catabolism; Synthesis of PC; Transport of bile salts and organic acids, metal ions and amine compounds	3	0
High	Q8BY89	Choline transporter-like protein 2 OS=Mus musculus OX=10090 GN=Slc44a2 PE=1 SV=2	0.002	5.165	3	2	2	2	706	80.1	8.79	2.14	2	Pf04515	68682	ENSMUSG00000057193	Slc44a2	mmu:68682; Q8BY89; Q8K2F1		Neutrophil degranulation; Synthesis of PC; Transport of bile salts and organic acids, metal ions and amine compounds	3	0
Low	Q921V7	Choline transporter-like protein 3 OS=Mus musculus OX=10090 GN=Slc44a3 PE=2 SV=3	0.08	1.439	5	2	2	2	656	73.4	7.74	2.19	2	Pf04515	213603	ENSMUSG00000039865	Slc44a3	G5E8A3; mmu:213603; Q921V7		Synthesis of PC; Transport of bile salts and organic acids, metal ions and amine compounds	2	0
Medium	P49586	Choline-phosphate cytidylyltransferase A OS=Mus musculus OX=10090 GN=Pcyt1a PE=1 SV=1	0.041	1.879	2	1	2	1	367	41.6	7.03	3.6	1	Pf01467	13026	ENSMUSG00000005615	Pcyt1a	mmu:13026; P49586; Q542W4	Acetylcholine Synthesis; One carbon metabolism and related pathways; Kennedy pathway; Glycerolipids and Glycerophospholipids	Synthesis of PC	5	0
Low	Q8VHY0	Chondroitin sulfate proteoglycan 4 OS=Mus musculus OX=10090 GN=Cspg4 PE=1 SV=3	0.181	0.903	1	1	1	1	2327	252.2	5.44	1.78	1	Pf00054, Pf02210, Pf16184	121021	ENSMUSG00000032911	Cspg4	G5E892; mmu:121021; Q5DTG1; Q8BPI8; Q8CE79; Q8VHY0	Spinal Cord Injury	A tetrasaccharide linker sequence is required for GAG synthesis; Chondroitin sulfate biosynthesis; CS/DS degradation; Dermatan sulfate biosynthesis	5	0
High	Q71M36	Chondroitin sulfate proteoglycan 5 OS=Mus musculus OX=10090 GN=Cspg5 PE=1 SV=2	0	24.508	12	5	15	5	566	60.4	4.54	27.06	5		29873	ENSMUSG00000032482	Cspg5	E9QN54; mmu:29873; Q71M36; Q71M37; Q7TNT8; Q8BPJ5; Q9QY32		A tetrasaccharide linker sequence is required for GAG synthesis; Chondroitin sulfate biosynthesis; CS/DS degradation; Dermatan sulfate biosynthesis	4	0
High	Q9CY57	Chromatin target of PRMT1 protein OS=Mus musculus OX=10090 GN=Chtop PE=1 SV=2	0	12.176	25	5	8	5	249	26.6	12.23	14.4	5	Pf13865	66511	ENSMUSG00000001017	Chtop	mmu:66511; Q0VBG3; Q3U7V6; Q3UF43; Q3V105; Q5XJG9; Q8C5N4; Q9CY57; Q9D7T3; Q9DB03; Q9DC54; Q9JJ95		Transport of Mature mRNA derived from an Intron-Containing Transcript; mRNA 3'-end processing; RNA Polymerase II Transcription Termination	3	0
High	P23198	Chromobox protein homolog 3 OS=Mus musculus OX=10090 GN=Cbx3 PE=1 SV=2	0.002	4.82	8	1	1	1	183	20.8	5.22	3.77	1	Pf00385, Pf01393			Cbx3	P23198; Q921C4		Transcriptional Regulation by E2F6; RNA Polymerase I Promoter Escape	2	0
Medium	Q61686	Chromobox protein homolog 5 OS=Mus musculus OX=10090 GN=Cbx5 PE=1 SV=1	0.011	2.758	4	1	1	1	191	22.2	5.86	1.85	1	Pf00385, Pf01393	12419	ENSMUSG00000009575	Cbx5	mmu:12419; Q61686; Q9CS35; Q9CXD1		Factors involved in megakaryocyte development and platelet production	1	0
Low	Q9D5D8	Chromodomain Y-like protein 2 OS=Mus musculus OX=10090 GN=Cdyl2 PE=1 SV=1	0.052	1.714	1	1	3	1	503	56.1	8.65	0	1	Pf00378, Pf00385	75796	ENSMUSG00000031758	Cdyl2	mmu:75796; Q9D5D8			0	0
Low	Q9CXF7	Chromodomain-helicase-DNA-binding protein 1-like OS=Mus musculus OX=10090 GN=Chd1l PE=1 SV=1	0.06	1.626	1	1	1	1	900	101.4	6.64	1.6	1	Pf00176	68058	ENSMUSG00000028089	Chd1l	mmu:68058; Q3TMX1; Q6P5C0; Q9CXF7		Formation of Incision Complex in GG-NER; Dual Incision in GG-NER	2	0
High	E9PZM4	Chromodomain-helicase-DNA-binding protein 2 OS=Mus musculus OX=10090 GN=Chd2 PE=1 SV=1	0.009	3.183	1	1	1	1	1827	210.7	8.06	2.25	1	Pf00176, Pf00385, Pf13907, Pf18375	244059	ENSMUSG00000078671	Chd2	E9PZM4; mmu:244059			0	0
High	Q6PDQ2	Chromodomain-helicase-DNA-binding protein 4 OS=Mus musculus OX=10090 GN=Chd4 PE=1 SV=1	0	43.942	8	15	27	9	1915	217.6	5.81	63.38	15	Pf00176, Pf00271, Pf00385, Pf06461, Pf06465, Pf08073	107932	ENSMUSG00000063870	Chd4	mmu:107932; Q6PDQ2	PluriNetWork: mechanisms associated with pluripotency	HDACs deacetylate histones; Regulation of TP53 Activity through Acetylation; RNA Polymerase I Transcription Initiation; Regulation of PTEN gene transcription; NGF-stimulated transcription	6	6
High	A2A8L1	Chromodomain-helicase-DNA-binding protein 5 OS=Mus musculus OX=10090 GN=Chd5 PE=1 SV=1	0	26.312	5	8	17	2	1946	222.4	6.24	50.29	8	Pf00176, Pf00271, Pf00385, Pf06461, Pf06465, Pf08073		ENSMUSG00000005045	Chd5	A2A8L1; Q6ZQB2			0	0
High	A3KFM7	Chromodomain-helicase-DNA-binding protein 6 OS=Mus musculus OX=10090 GN=Chd6 PE=1 SV=1	0.009	2.967	1	2	2	2	2711	305.2	6.38	2.01	2	Pf00176, Pf00271, Pf00385	71389	ENSMUSG00000057133	Chd6	A3KFM7; B9EKA7; mmu:71389; Q3UQS6; Q80TE9			0	0
Medium	A2AJK6	Chromodomain-helicase-DNA-binding protein 7 OS=Mus musculus OX=10090 GN=Chd7 PE=1 SV=1	0.018	2.379	1	2	2	1	2986	333.9	6.47	0	2	Pf00176, Pf00271, Pf00385	320790	ENSMUSG00000041235	Chd7	A2AJK6; mmu:320790; Q3TA86; Q3TAG7; Q3TBU4; Q8C986; Q8K244			0	0
High	Q09XV5	Chromodomain-helicase-DNA-binding protein 8 OS=Mus musculus OX=10090 GN=Chd8 PE=1 SV=1	0.008	3.496	2	3	3	2	2582	290.7	6.42	0	3	Pf00176, Pf00385	67772	ENSMUSG00000053754	Chd8	mmu:67772; Q09XV5; Q3TV89; Q5I1Z2; Q6ZPM8		Deactivation of the beta-catenin transactivating complex	1	0
Low	Q8BIW9	Chromosome transmission fidelity protein 18 homolog OS=Mus musculus OX=10090 GN=Chtf18 PE=1 SV=2	0.225	0.792	1	1	1	1	969	108.1	6.8	1.68	1	Pf00004	214901		Chtf18	mmu:214901; Q8BIW9; Q8R1R7		Polymerase switching on the C-strand of the telomere	1	0
Low	P0CG15	Chromosome transmission fidelity protein 8 homolog OS=Mus musculus OX=10090 GN=Chtf8 PE=3 SV=1	0.051	1.737	11	1	1	1	121	13.2	8.66	0	1	Pf09696	214987	ENSMUSG00000046691	Chtf8	mmu:214987; P0C6T0; P0CG15; Q8BHM2; Q8R5A5		Polymerase switching on the C-strand of the telomere	1	0
High	Q8BTU1	Cilia- and flagella-associated protein 20 OS=Mus musculus OX=10090 GN=Cfap20 PE=1 SV=1	0.001	5.333	10	2	3	2	193	22.7	9.76	7.24	2	Pf05018	14894	ENSMUSG00000031796	Cfap20	mmu:14894; P70212; Q3T9D6; Q8BTU1			0	0
High	Q8C6E0	Cilia- and flagella-associated protein 36 OS=Mus musculus OX=10090 GN=Cfap36 PE=1 SV=1	0	8.322	11	2	2	2	343	39.6	4.93	4.39	2		216618	ENSMUSG00000020462	Cfap36	mmu:216618; Q8C6E0; Q9CWQ4			0	0
High	Q8C6G1	Cilia- and flagella-associated protein 410 OS=Mus musculus OX=10090 GN=Cfap410 PE=1 SV=1	0.009	3.262	5	1	2	1	249	28.2	6.93	4.74	1		67884	ENSMUSG00000020284	Cfap410	mmu:67884; Q8C6G1; Q91Z02			0	0
Low	E9Q7R9	Cilia- and flagella-associated protein 43 OS=Mus musculus OX=10090 GN=Cfap43 PE=1 SV=1	0.22	0.803	2	1	1	1	1682	193.3	5.62	0	1		100048534	ENSMUSG00000044948	Cfap43	E9Q7R9; mmu:100048534			0	0
Low	Q8CEL2	Cilia- and flagella-associated protein 61 OS=Mus musculus OX=10090 GN=Cfap61 PE=1 SV=2	0.152	1	1	1	1	1	1252	143.2	6.39	0	1	Pf16092			Cfap61	Q3KNX7; Q8CEL2; Q8R1E0			0	0
Low	Q6ZPR1	Cilia- and flagella-associated protein 97 OS=Mus musculus OX=10090 GN=Cfap97 PE=1 SV=2	0.069	1.542	2	1	1	1	541	60.8	9.51	0	1	Pf13879	66756	ENSMUSG00000031631	Cfap97	mmu:66756; Q6ZPR1; Q9D462			0	0
Medium	O88507	Ciliary neurotrophic factor receptor subunit alpha OS=Mus musculus OX=10090 GN=Cntfr PE=1 SV=2	0.013	2.609	2	1	2	1	372	40.8	6.83	0	1		12804	ENSMUSG00000028444	Cntfr	mmu:12804; O88507; Q80T01	Delta-Notch Signaling Pathway; Adipogenesis genes	IL-6-type cytokine receptor ligand interactions	3	0
High	Q9CZU6	Citrate synthase, mitochondrial OS=Mus musculus OX=10090 GN=Cs PE=1 SV=1	0	41.113	25	13	39	13	464	51.7	8.57	45.96	13	Pf00285	12974	ENSMUSG00000005683	Cs	mmu:12974; Q3UDP3; Q9CZU6	TCA Cycle	Citric acid cycle (TCA cycle)	2	0
High	P49025	Citron Rho-interacting kinase OS=Mus musculus OX=10090 GN=Cit PE=1 SV=3	0	54.999	11	23	33	23	2055	235.2	6.54	57.29	23	Pf00069, Pf00780	12704		Cit	O88528; O88937; O88938; P49025; Q3UM99; Q8CIJ1	G13 Signaling Pathway	RHO GTPases activate CIT; RAC1 GTPase cycle; RHOA GTPase cycle; RHOB GTPase cycle; RHOC GTPase cycle	6	0
Medium	Q8CJ61	CKLF-like MARVEL transmembrane domain-containing protein 4 OS=Mus musculus OX=10090 GN=Cmtm4 PE=1 SV=1	0.017	2.405	4	1	3	1	208	22.9	5.59	4.22	1	Pf01284	97487	ENSMUSG00000096188	Cmtm4	mmu:97487; Q8CJ61; Q8K143			0	0
Medium	Q80YR7	Claspin OS=Mus musculus OX=10090 GN=Clspn PE=1 SV=2	0.018	2.359	2	2	2	1	1315	146.6	4.79	1.91	2		269582	ENSMUSG00000042489	Clspn	B1ARX6; mmu:269582; Q69GM2; Q80YR7		Ub-specific processing proteases; Apoptotic cleavage of cellular proteins; Processing of DNA double-strand break ends; Activation of ATR in response to replication stress	4	0
High	Q61548	Clathrin coat assembly protein AP180 OS=Mus musculus OX=10090 GN=Snap91 PE=1 SV=1	0	61.195	20	16	38	14	901	91.8	4.88	66.94	16	Pf07651	20616		Snap91	mmu:20616; Q61547; Q61548; Q8K0D4		Cargo recognition for clathrin-mediated endocytosis	2	1
High	Q68FD5	Clathrin heavy chain 1 OS=Mus musculus OX=10090 GN=Cltc PE=1 SV=3	0	484.037	54	93	441	93	1675	191.4	5.69	961.89	93	Pf00637, Pf09268	67300	ENSMUSG00000047126	Cltc	mmu:67300; Q68FD5	IL-7 Signaling Pathway; Kit Receptor Signaling Pathway	MHC class II antigen presentation; Recycling pathway of L1; Cargo recognition for clathrin-mediated endocytosis; Golgi Associated Vesicle Biogenesis; LDL clearance; Retrograde neurotrophin signalling; Formation of annular gap junctions; Lysosome Vesicle Biogenesis; WNT5A-dependent internalization of FZD4; WNT5A-dependent internalization of FZD2, FZD5 and ROR2; VLDLR internalisation and degradatio…	17	0
High	Q99KN9	Clathrin interactor 1 OS=Mus musculus OX=10090 GN=Clint1 PE=1 SV=2	0	30.377	17	10	17	10	631	68.5	6.25	33.69	10				Clint1	Q8CFH4; Q99KN9		Golgi Associated Vesicle Biogenesis	1	0
High	O08585	Clathrin light chain A OS=Mus musculus OX=10090 GN=Clta PE=1 SV=2	0	35.264	31	12	50	12	235	25.6	4.58	98.04	12				Clta	O08585		MHC class II antigen presentation; Recycling pathway of L1; Cargo recognition for clathrin-mediated endocytosis; Golgi Associated Vesicle Biogenesis; LDL clearance; Retrograde neurotrophin signalling; Formation of annular gap junctions; Lysosome Vesicle Biogenesis; WNT5A-dependent internalization of FZD4; WNT5A-dependent internalization of FZD2, FZD5 and ROR2; VLDLR internalisation and degradation	13	0
High	Q6IRU5	Clathrin light chain B OS=Mus musculus OX=10090 GN=Cltb PE=1 SV=1	0	52.296	40	12	42	12	229	25.2	4.63	97.04	12		74325	ENSMUSG00000047547	Cltb	mmu:74325; Q6IRU5; Q8BR04; Q8CDX9; Q9CV35		Cargo recognition for clathrin-mediated endocytosis; WNT5A-dependent internalization of FZD4; WNT5A-dependent internalization of FZD2, FZD5 and ROR2; Formation of annular gap junctions; Lysosome Vesicle Biogenesis	7	0
High	Q60771	Claudin-11 OS=Mus musculus OX=10090 GN=Cldn11 PE=1 SV=1	0	13.514	15	4	14	4	207	22.1	7.91	14.24	4	Pf00822	18417	ENSMUSG00000037625	Cldn11	mmu:18417; Q545N5; Q60771; Q9DB65			0	0
High	Q9ET43	Claudin-12 OS=Mus musculus OX=10090 GN=Cldn12 PE=1 SV=2	0.003	4.629	6	1	2	1	244	27	8.47	5.4	1		64945	ENSMUSG00000046798	Cldn12	mmu:64945; Q3TM65; Q8BH13; Q9ET43			0	0
High	Q9D4C9	Clavesin-1 OS=Mus musculus OX=10090 GN=Clvs1 PE=1 SV=1	0	11.369	11	3	6	1	354	40.6	6.73	18.21	3		74438	ENSMUSG00000041216	Clvs1	mmu:74438; Q3UWV3; Q497H3; Q8BJE8; Q8BXX0; Q9D4C9		Lysosome Vesicle Biogenesis	1	2
High	Q8BG92	Clavesin-2 OS=Mus musculus OX=10090 GN=Clvs2 PE=1 SV=1	0	9.228	12	3	5	1	327	37.9	6.2	12.39	3		215890	ENSMUSG00000019785	Clvs2	mmu:215890; Q8BG92; Q8BKA5		Lysosome Vesicle Biogenesis	1	0
Low	Q9EPU4	Cleavage and polyadenylation specificity factor subunit 1 OS=Mus musculus OX=10090 GN=Cpsf1 PE=1 SV=1	0.125	1.124	1	1	1	1	1441	160.7	6.39	0	1		94230	ENSMUSG00000034022	Cpsf1	mmu:94230; Q9EPU4	mRNA processing	mRNA Splicing - Major Pathway; mRNA 3'-end processing; RNA Polymerase II Transcription Termination; Transport of Mature mRNA Derived from an Intronless Transcript; Processing of Intronless Pre-mRNAs	6	0
Low	O35218	Cleavage and polyadenylation specificity factor subunit 2 OS=Mus musculus OX=10090 GN=Cpsf2 PE=1 SV=1	0.236	0.769	1	1	1	1	782	88.3	5.11	1.61	1	Pf10996, Pf13299	51786	ENSMUSG00000041781	Cpsf2	mmu:51786; O35218	mRNA processing	Transport of Mature mRNA Derived from an Intronless Transcript; mRNA 3'-end processing; RNA Polymerase II Transcription Termination; mRNA Splicing - Major Pathway; Processing of Intronless Pre-mRNAs	6	0
High	Q9CQF3	Cleavage and polyadenylation specificity factor subunit 5 OS=Mus musculus OX=10090 GN=Nudt21 PE=1 SV=1	0	8.165	20	3	3	3	227	26.2	8.82	7.44	3		68219	ENSMUSG00000031754	Nudt21	mmu:68219; Q3UJK1; Q9CQF3	mRNA processing	mRNA Splicing - Major Pathway; mRNA 3'-end processing; RNA Polymerase II Transcription Termination; Processing of Intronless Pre-mRNAs	5	0
High	Q6NVF9	Cleavage and polyadenylation specificity factor subunit 6 OS=Mus musculus OX=10090 GN=Cpsf6 PE=1 SV=1	0	10.415	9	4	11	4	551	59.1	7.15	26.41	4	Pf00076	432508	ENSMUSG00000055531	Cpsf6	mmu:432508; Q6NVF9; Q8BX86; Q8BXI8			0	0
High	Q8BTV2	Cleavage and polyadenylation specificity factor subunit 7 OS=Mus musculus OX=10090 GN=Cpsf7 PE=1 SV=2	0	6.567	11	4	5	4	471	52	8	7.98	4	Pf00076	269061	ENSMUSG00000034820	Cpsf7	mmu:269061; Q3TNF1; Q8BKE7; Q8BTV2; Q8CFS8	mRNA processing	mRNA Splicing - Major Pathway; RHOBTB1 GTPase cycle; mRNA 3'-end processing; RNA Polymerase II Transcription Termination; Processing of Intronless Pre-mRNAs	6	0
High	Q8BIQ5	Cleavage stimulation factor subunit 2 OS=Mus musculus OX=10090 GN=Cstf2 PE=1 SV=2	0	6.772	6	2	3	2	580	61.3	6.83	9	2	Pf00076, Pf14304, Pf14327	108062	ENSMUSG00000031256	Cstf2	A2AEJ9; A2AEK0; mmu:108062; Q8BIQ5; Q8K1Y6; Q9ERC2	mRNA processing	mRNA Splicing - Major Pathway; mRNA 3'-end processing; RNA Polymerase II Transcription Termination; Processing of Intronless Pre-mRNAs	5	0
Low	Q8C7E9	Cleavage stimulation factor subunit 2 tau variant OS=Mus musculus OX=10090 GN=Cstf2t PE=1 SV=2	0.105	1.237	4	1	1	1	632	65.8	7.25	0	1	Pf00076, Pf14304, Pf14327	83410	ENSMUSG00000053536	Cstf2t	mmu:83410; Q6A016; Q8BHH7; Q8C3W7; Q8C7E9; Q8R2Y1; Q9EPU3	mRNA processing	mRNA Splicing - Major Pathway; mRNA 3'-end processing; RNA Polymerase II Transcription Termination; Processing of Intronless Pre-mRNAs	5	0
Medium	Q99LI7	Cleavage stimulation factor subunit 3 OS=Mus musculus OX=10090 GN=Cstf3 PE=1 SV=1	0.023	2.216	1	1	1	1	717	82.8	8.12	0	1	Pf05843	228410	ENSMUSG00000027176	Cstf3	mmu:228410; Q99LI7	mRNA processing	mRNA Splicing - Major Pathway; mRNA 3'-end processing; RNA Polymerase II Transcription Termination; Processing of Intronless Pre-mRNAs	5	0
High	Q8VBZ3	Cleft lip and palate transmembrane protein 1 homolog OS=Mus musculus OX=10090 GN=Clptm1 PE=1 SV=1	0	23.045	15	7	13	7	664	75.2	6.3	24.94	7	Pf05602	56457	ENSMUSG00000002981	Clptm1	mmu:56457; O08708; Q3U758; Q3U823; Q3UG77; Q8VBZ3; Q8VEJ6			0	0
High	Q80TV8	CLIP-associating protein 1 OS=Mus musculus OX=10090 GN=Clasp1 PE=1 SV=2	0	94.149	23	30	49	25	1535	169.1	9.03	99.52	30		76707		Clasp1	mmu:76707; Q505G6; Q6DI75; Q6PG14; Q80TV8; Q8BNS4; Q99JH5; Q99JI2; Q9CVU1		Separation of Sister Chromatids; Anchoring of the basal body to the plasma membrane; Amplification of signal from unattached kinetochores via a MAD2 inhibitory signal; Resolution of Sister Chromatid Cohesion; Regulation of PLK1 Activity at G2/M Transition; Loss of Nlp from mitotic centrosomes; Recruitment of mitotic centrosome proteins and complexes; Recruitment of NuMA to mitotic centrosomes; RH…	13	0
High	Q8BRT1	CLIP-associating protein 2 OS=Mus musculus OX=10090 GN=Clasp2 PE=1 SV=1	0	227.336	43	49	132	44	1286	140.7	8.63	273.05	49		76499		Clasp2	mmu:76499; Q8BRT1; Q8CHE3; Q99JI3; Q9DB80		Separation of Sister Chromatids; Amplification of signal from unattached kinetochores via a MAD2 inhibitory signal; Resolution of Sister Chromatid Cohesion; RHO GTPases Activate Formins; EML4 and NUDC in mitotic spindle formation	6	5
High	Q5SW19	Clustered mitochondria protein homolog OS=Mus musculus OX=10090 GN=Cluh PE=1 SV=2	0	19.659	8	8	11	8	1315	148	6.02	19.17	8	Pf13424, Pf15044	74148		Cluh	A8Y5E2; mmu:74148; Q3U014; Q3U4M5; Q3V3Q8; Q505Q6; Q5SW19; Q6GQX1; Q6PAT1; Q8CHD9			0	0
Low	Q06890	Clusterin OS=Mus musculus OX=10090 GN=Clu PE=1 SV=1	0.1	1.273	2	1	1	1	448	51.6	5.67	0	1		12759	ENSMUSG00000022037	Clu	mmu:12759; Q06890		Platelet degranulation ; Regulation of Complement cascade; Antimicrobial peptides; Terminal pathway of complement	4	0
High	Q9CQI6	Coactosin-like protein OS=Mus musculus OX=10090 GN=Cotl1 PE=1 SV=3	0	28.991	67	11	25	11	142	15.9	5.4	60.26	11	Pf00241	72042	ENSMUSG00000031827	Cotl1	mmu:72042; Q9CQI6		Neutrophil degranulation	1	0
Medium	O88783	Coagulation factor V OS=Mus musculus OX=10090 GN=F5 PE=1 SV=1	0.022	2.256	1	2	3	2	2183	247.1	6.05	2.26	2	Pf00754, Pf07732	14067	ENSMUSG00000026579	F5	mmu:14067; O88783; Q3UTQ2; Q3UV80	Blood Clotting Cascade	Platelet degranulation ; Regulation of Insulin-like Growth Factor (IGF) transport and uptake by Insulin-like Growth Factor Binding Proteins (IGFBPs); Post-translational protein phosphorylation; Common Pathway of Fibrin Clot Formation; COPII-mediated vesicle transport; Cargo concentration in the ER	7	0
High	Q8CIE6	Coatomer subunit alpha OS=Mus musculus OX=10090 GN=Copa PE=1 SV=2	0	40.822	10	12	20	12	1224	138.3	7.65	46.45	12	Pf00400, Pf04053	12847	ENSMUSG00000026553	Copa	E9Q075; mmu:12847; Q8CIE6		COPI-dependent Golgi-to-ER retrograde traffic; COPI-mediated anterograde transport	2	0
High	Q9JIF7	Coatomer subunit beta OS=Mus musculus OX=10090 GN=Copb1 PE=1 SV=1	0	18.896	10	7	11	7	953	107	6	20.07	7	Pf07718	70349	ENSMUSG00000030754	Copb1	mmu:70349; Q3T9Y4; Q3TT72; Q3U8G9; Q3UE02; Q9JIF7		Neutrophil degranulation; COPI-dependent Golgi-to-ER retrograde traffic; COPI-mediated anterograde transport	3	0
High	O55029	Coatomer subunit beta' OS=Mus musculus OX=10090 GN=Copb2 PE=1 SV=2	0	26.746	15	10	14	10	905	102.4	5.3	27.65	10	Pf00400, Pf04053	50797	ENSMUSG00000032458	Copb2	mmu:50797; O55029; Q3U5Z9		COPI-dependent Golgi-to-ER retrograde traffic; COPI-mediated anterograde transport	2	0
High	Q5XJY5	Coatomer subunit delta OS=Mus musculus OX=10090 GN=Arcn1 PE=1 SV=2	0	13.903	16	8	9	8	511	57.2	6.21	11.33	8	Pf00928, Pf01217	213827	ENSMUSG00000032096	Arcn1	mmu:213827; Q5XJY5; Q91W48		COPI-dependent Golgi-to-ER retrograde traffic; COPI-mediated anterograde transport	2	0
High	O89079	Coatomer subunit epsilon OS=Mus musculus OX=10090 GN=Cope PE=1 SV=3	0.001	5.308	7	1	3	1	308	34.5	5.06	10.03	1	Pf04733	59042	ENSMUSG00000055681	Cope	mmu:59042; O89079; Q9JM65		COPI-dependent Golgi-to-ER retrograde traffic; COPI-mediated anterograde transport	2	0
High	Q9QZE5	Coatomer subunit gamma-1 OS=Mus musculus OX=10090 GN=Copg1 PE=1 SV=1	0	14.65	8	6	10	4	874	97.5	5.35	13.57	6	Pf08752	54161	ENSMUSG00000030058	Copg1	mmu:54161; Q3U9F4; Q8BP96; Q8R1A7; Q922C6; Q9QZE5		COPI-dependent Golgi-to-ER retrograde traffic; COPI-mediated anterograde transport	2	1
High	Q9QXK3	Coatomer subunit gamma-2 OS=Mus musculus OX=10090 GN=Copg2 PE=1 SV=1	0	9.159	5	4	10	2	871	97.6	5.8	13.88	4	Pf08752	54160	ENSMUSG00000025607	Copg2	A6H6J5; mmu:54160; Q3TQD5; Q3UEL6; Q8C2J6; Q9QXK3		COPI-dependent Golgi-to-ER retrograde traffic; COPI-mediated anterograde transport	2	0
Low	Q9JHH9	Coatomer subunit zeta-2 OS=Mus musculus OX=10090 GN=Copz2 PE=1 SV=1	0.193	0.873	14	1	1	1	205	22.9	5.17	0	1	Pf01217	56358	ENSMUSG00000018672	Copz2	A2A6D6; mmu:56358; Q9JHH9		COPI-dependent Golgi-to-ER retrograde traffic; COPI-mediated anterograde transport	2	0
Low	Q62507	Cochlin OS=Mus musculus OX=10090 GN=Coch PE=1 SV=2	0.21	0.829	2	1	1	1	552	59.9	8.44	0	1	Pf00092	12810	ENSMUSG00000020953	Coch	mmu:12810; Q3TAF5; Q62507; Q9QWK6			0	0
High	P18760	Cofilin-1 OS=Mus musculus OX=10090 GN=Cfl1 PE=1 SV=3	0	64.14	81	16	55	13	166	18.5	8.09	104.09	16	Pf00241	12631	ENSMUSG00000056201	Cfl1	mmu:12631; P18760	G13 Signaling Pathway; Regulation of Actin Cytoskeleton		2	3
High	P45591	Cofilin-2 OS=Mus musculus OX=10090 GN=Cfl2 PE=1 SV=1	0	25.703	35	6	26	2	166	18.7	7.88	39.18	6	Pf00241	12632	ENSMUSG00000062929	Cfl2	mmu:12632; P45591	G13 Signaling Pathway; Regulation of Actin Cytoskeleton		2	1
Low	O35638	Cohesin subunit SA-2 OS=Mus musculus OX=10090 GN=Stag2 PE=1 SV=3	0.17	0.943	2	1	1	1	1231	141.2	5.43	2.09	1	Pf08514	20843	ENSMUSG00000025862	Stag2	A2AFF5; mmu:20843; O35638; Q6NZN7		Separation of Sister Chromatids; SUMOylation of DNA damage response and repair proteins; Resolution of Sister Chromatid Cohesion; Establishment of Sister Chromatid Cohesion; Cohesin Loading onto Chromatin	5	0
Low	O70576	Cohesin subunit SA-3 OS=Mus musculus OX=10090 GN=Stag3 PE=1 SV=2	0.184	0.897	1	1	2	1	1240	141.1	6.29	2.3	1	Pf08514	50878	ENSMUSG00000036928	Stag3	B2RSV0; mmu:50878; O70576			0	0
High	Q8K1A6	Coiled-coil and C2 domain-containing protein 1A OS=Mus musculus OX=10090 GN=Cc2d1a PE=1 SV=2	0	17.621	9	9	14	9	943	103.6	7.84	19.65	9	Pf00168	212139	ENSMUSG00000036686	Cc2d1a	mmu:212139; Q2MJB5; Q8K1A6; Q8R3Z4	SIDS Susceptibility Pathways		1	0
Medium	Q8BRN9	Coiled-coil and C2 domain-containing protein 1B OS=Mus musculus OX=10090 GN=Cc2d1b PE=1 SV=1	0.026	2.155	1	1	1	1	848	93	5.41	1.97	1		319965	ENSMUSG00000028582	Cc2d1b	B2RQ40; mmu:319965; Q3UJ60; Q69Z95; Q8BRN9		Sealing of the nuclear envelope (NE) by ESCRT-III	1	0
Low	Q9D4K7	Coiled-coil domain-containing protein 105 OS=Mus musculus OX=10090 GN=Ccdc105 PE=1 SV=3	0.175	0.924	2	1	1	1	499	57.3	9.82	2.4	1	Pf03148	70976	ENSMUSG00000078442	Ccdc105	G3X9S0; mmu:70976; Q9D4K7			0	0
Low	Q3ULM0	Coiled-coil domain-containing protein 106 OS=Mus musculus OX=10090 GN=Ccdc106 PE=1 SV=1	0.195	0.867	2	1	1	1	279	32.1	9.36	0	1	Pf15794	232821	ENSMUSG00000035228	Ccdc106	mmu:232821; Q3ULM0; Q8K5E2; Q8VEI0			0	0
Low	A2AEV7	Coiled-coil domain-containing protein 120 OS=Mus musculus OX=10090 GN=Ccdc120 PE=1 SV=1	0.133	1.082	1	1	1	1	629	67.4	9.55	1.79	1		54648	ENSMUSG00000031150	Ccdc120	A2AEV7; A2AEV8; mmu:54648			0	0
High	Q9D8X2	Coiled-coil domain-containing protein 124 OS=Mus musculus OX=10090 GN=Ccdc124 PE=1 SV=1	0	13.934	27	6	11	6	217	25.3	9.64	13.08	6	Pf06244	234388	ENSMUSG00000007721	Ccdc124	mmu:234388; Q8C2T0; Q9D8X2			0	0
Low	D3YV10	Coiled-coil domain-containing protein 13 OS=Mus musculus OX=10090 GN=Ccdc13 PE=1 SV=1	0.083	1.384	1	1	3	1	709	79.7	9.01	3.77	1		100502861	ENSMUSG00000079235	Ccdc13	D3YV10; mmu:100502861			0	0
High	Q3TVA9	Coiled-coil domain-containing protein 136 OS=Mus musculus OX=10090 GN=Ccdc136 PE=1 SV=2	0	42.87	15	11	17	10	1136	131.8	4.84	38.34	11		232664		Ccdc136	mmu:232664; Q3TVA9; Q923E5			0	0
Low	Q0VF22	Coiled-coil domain-containing protein 138 OS=Mus musculus OX=10090 GN=Ccdc138 PE=1 SV=1	0.055	1.676	3	2	2	2	680	77.9	8.16	0	2		76138	ENSMUSG00000038010	Ccdc138	mmu:76138; Q0VF22; Q8CG93			0	0
Low	Q6RUT8	Coiled-coil domain-containing protein 154 OS=Mus musculus OX=10090 GN=Ccdc154 PE=2 SV=3	0.055	1.682	6	2	2	2	664	76.1	6.29	0	2	Pf15450	207209	ENSMUSG00000059562	Ccdc154	G9JV17; mmu:207209; Q3V0K0; Q6RUT8			0	0
Medium	Q9D162	Coiled-coil domain-containing protein 167 OS=Mus musculus OX=10090 GN=Ccdc167 PE=1 SV=2	0.01	2.851	15	1	1	1	97	11.5	9.39	2.7	1	Pf15188	68597	ENSMUSG00000024018	Ccdc167	mmu:68597; Q8BQL8; Q8C3L9; Q8R1Y8; Q9D162			0	0
High	Q3UHB8	Coiled-coil domain-containing protein 177 OS=Mus musculus OX=10090 GN=Ccdc177 PE=1 SV=1	0	31.74	11	5	12	5	706	79.8	10.8	32.23	5	Pf15558	380768	ENSMUSG00000062961	Ccdc177	mmu:380768; Q3UHB8; Q6NXJ5			0	0
Medium	Q8C9S4	Coiled-coil domain-containing protein 186 OS=Mus musculus OX=10090 GN=Ccdc186 PE=1 SV=2	0.048	1.779	2	2	3	1	917	104.8	5.53	3.43	2		213993	ENSMUSG00000035173	Ccdc186	mmu:213993; Q6P3D6; Q8C9S4; Q8CJC0			0	0
High	Q9JIG7	Coiled-coil domain-containing protein 22 OS=Mus musculus OX=10090 GN=Ccdc22 PE=1 SV=1	0.008	3.441	2	1	1	1	627	70.8	6.01	3.23	1	Pf05667	54638	ENSMUSG00000031143	Ccdc22	B1AVA1; mmu:54638; Q8BYH4; Q9JIG7		Neddylation	1	0
Low	Q3V036	Coiled-coil domain-containing protein 27 OS=Mus musculus OX=10090 GN=Ccdc27 PE=2 SV=1	0.23	0.781	1	1	3	1	639	73.6	5.35	3.91	1		381580	ENSMUSG00000039492	Ccdc27	mmu:381580; Q3V036			0	0
High	Q8CEG5	Coiled-coil domain-containing protein 28B OS=Mus musculus OX=10090 GN=Ccdc28b PE=1 SV=3	0.003	4.595	8	1	2	1	200	22	5.36	4.06	1		66264	ENSMUSG00000028795	Ccdc28b	A2ADZ9; mmu:66264; Q8CEG5; Q8K132			0	0
Medium	Q8BI79	Coiled-coil domain-containing protein 40 OS=Mus musculus OX=10090 GN=Ccdc40 PE=1 SV=1	0.016	2.449	2	2	2	2	1192	136.7	5.05	2.18	2	Pf08647		ENSMUSG00000039963	Ccdc40	A2AFL0; Q5U4C0; Q8BI59; Q8BI79			0	0
High	Q810U5	Coiled-coil domain-containing protein 50 OS=Mus musculus OX=10090 GN=Ccdc50 PE=1 SV=1	0.001	5.417	10	3	4	2	305	35.3	6.89	2.38	3	Pf15295	67501	ENSMUSG00000038127	Ccdc50	A6X929; mmu:67501; Q3TRW1; Q810U5; Q8BP82; Q9CZT1; Q9D436			0	0
High	D3YZP9	Coiled-coil domain-containing protein 6 OS=Mus musculus OX=10090 GN=Ccdc6 PE=1 SV=1	0	25.866	25	9	16	9	469	52.9	7.34	30.14	9	Pf09755	76551	ENSMUSG00000048701	Ccdc6	D3YZP9; mmu:76551			0	0
Low	Q8CDM4	Coiled-coil domain-containing protein 73 OS=Mus musculus OX=10090 GN=Ccdc73 PE=2 SV=2	0.137	1.061	1	1	1	1	1066	120.3	5.68	0	1	Pf15818	211936	ENSMUSG00000045106	Ccdc73	A2A6Z9; mmu:211936; Q501M4; Q8CDM4			0	0
High	Q5SP85	Coiled-coil domain-containing protein 85A OS=Mus musculus OX=10090 GN=Ccdc85a PE=1 SV=1	0	21.862	22	9	12	9	500	54.5	8	23.44	9		216613	ENSMUSG00000032878	Ccdc85a	mmu:216613; Q5SP85; Q69Z68; Q6NZL9; Q8BGZ5; Q8BLC5; Q8VCC5			0	0
Medium	E9Q6B2	Coiled-coil domain-containing protein 85C OS=Mus musculus OX=10090 GN=Ccdc85c PE=1 SV=1	0.014	2.529	8	2	2	2	420	45.3	6.96	4.64	2		668158	ENSMUSG00000084883	Ccdc85c	E9Q6B2; mmu:668158			0	0
Low	Q4QRL3	Coiled-coil domain-containing protein 88B OS=Mus musculus OX=10090 GN=Ccdc88b PE=1 SV=2	0.197	0.862	1	1	1	1	1481	166.5	5.33	0	1		78317	ENSMUSG00000047810	Ccdc88b	B2RX63; mmu:78317; Q4QRL3			0	0
Low	Q9D8L5	Coiled-coil domain-containing protein 91 OS=Mus musculus OX=10090 GN=Ccdc91 PE=1 SV=2	0.116	1.183	3	1	1	1	442	50	5.07	1.6	1		67015	ENSMUSG00000030301	Ccdc91	mmu:67015; Q8R3N8; Q9D8L5; Q9D9E8			0	0
Medium	Q8VDN4	Coiled-coil domain-containing protein 92 OS=Mus musculus OX=10090 GN=Ccdc92 PE=1 SV=1	0.044	1.83	9	1	1	1	314	35.2	9.38	0	1		215707	ENSMUSG00000037979	Ccdc92	mmu:215707; Q8VDN4			0	0
High	Q7TQK5	Coiled-coil domain-containing protein 93 OS=Mus musculus OX=10090 GN=Ccdc93 PE=1 SV=1	0.004	4.281	3	2	2	2	629	72.6	8.29	4.75	2	Pf09762	70829	ENSMUSG00000026339	Ccdc93	mmu:70829; Q3TX53; Q7TQK5			0	0
High	Q8BJM3	Coiled-coil domain-containing protein R3HCC1L OS=Mus musculus OX=10090 GN=R3hcc1l PE=1 SV=1	0.01	2.928	3	1	1	1	775	84.4	4.87	2.79	1		52013	ENSMUSG00000025184	R3hcc1l	mmu:52013; Q3UGJ8; Q5U5U8; Q8BJM3			0	0
High	Q9D1L0	Coiled-coil-helix-coiled-coil-helix domain-containing protein 2 OS=Mus musculus OX=10090 GN=Chchd2 PE=2 SV=1	0	9.076	15	2	4	2	153	15.7	9.66	13.08	2		14004	ENSMUSG00000070493	Chchd2	mmu:14004; Q3TUG8; Q9D1L0			0	0
Medium	Q5SU73	Coilin OS=Mus musculus OX=10090 GN=Coil PE=1 SV=1	0.029	2.094	2	2	3	2	570	61.9	9	1.64	2	Pf15862		ENSMUSG00000033983	Coil	Q3TK39; Q5SU73; Q8K0K5; Q8VIQ2; Q9QXI1			0	0
High	Q91W50	Cold shock domain-containing protein E1 OS=Mus musculus OX=10090 GN=Csde1 PE=1 SV=1	0	81.506	31	26	48	26	798	88.7	6.37	113.46	26	Pf00313	229663	ENSMUSG00000068823	Csde1	mmu:229663; Q91W50	mRNA processing		1	0
High	P60824	Cold-inducible RNA-binding protein OS=Mus musculus OX=10090 GN=Cirbp PE=1 SV=1	0	12.396	37	7	11	7	172	18.6	9.61	12.02	7	Pf00076	12696	ENSMUSG00000045193	Cirbp	mmu:12696; O09069; O09148; P60824; Q3V1A6; Q61413	mRNA processing		1	0
Medium	P11087	Collagen alpha-1(I) chain OS=Mus musculus OX=10090 GN=Col1a1 PE=1 SV=4	0.016	2.499	1	1	2	1	1453	137.9	5.85	2.02	1	Pf00093, Pf01391, Pf01410	12842	ENSMUSG00000001506	Col1a1	mmu:12842; P11087; Q53WT0; Q60635; Q61367; Q61427; Q63919; Q6PCL3; Q810J9	Osteoblast; Focal Adhesion-PI3K-Akt-mTOR-signaling pathway; Dysregulated miRNA Targeting in Insulin/PI3K-AKT Signaling; Inflammatory Response Pathway; Focal Adhesion	Immunoregulatory interactions between a Lymphoid and a non-Lymphoid cell; Cell surface interactions at the vascular wall; ECM proteoglycans; Integrin cell surface interactions; Collagen chain trimerization; Collagen degradation; Anchoring fibril formation; Crosslinking of collagen fibrils; Non-integrin membrane-ECM interactions; GPVI-mediated activation cascade; GP1b-IX-V activation signalling; P…	22	0
High	P28481	Collagen alpha-1(II) chain OS=Mus musculus OX=10090 GN=Col2a1 PE=1 SV=2	0.009	3.06	4	3	3	3	1487	141.9	6.92	0	3	Pf00093, Pf01391, Pf01410	12824	ENSMUSG00000022483	Col2a1	mmu:12824; P28481; Q61428; Q62031; Q62032; Q62033; Q641K3; Q6LDB1; Q6LDI8; Q6LDI9; Q80VY3; Q80X38; Q8CEF7; Q8K0N6	Endochondral Ossification; Neural Crest Differentiation; Spinal Cord Injury; Focal Adhesion-PI3K-Akt-mTOR-signaling pathway; Focal Adhesion	Immunoregulatory interactions between a Lymphoid and a non-Lymphoid cell; ECM proteoglycans; Integrin cell surface interactions; MET activates PTK2 signaling; Signaling by PDGF; Assembly of collagen fibrils and other multimeric structures; NCAM1 interactions; Collagen chain trimerization; Collagen degradation; Non-integrin membrane-ECM interactions	17	0
High	P02463	Collagen alpha-1(IV) chain OS=Mus musculus OX=10090 GN=Col4a1 PE=1 SV=4	0.001	5.544	3	3	4	3	1669	160.6	8.24	4.63	3	Pf01391	12826	ENSMUSG00000031502	Col4a1	mmu:12826; P02463; Q3UHJ4; Q3UJE7; Q3UQV2; Q53X35; Q6GQS7; Q6PHB5; Q99LQ8	Spinal Cord Injury; Focal Adhesion-PI3K-Akt-mTOR-signaling pathway; Focal Adhesion	Laminin interactions; Signaling by PDGF; Integrin cell surface interactions; NCAM1 interactions; Collagen chain trimerization; Collagen degradation; Anchoring fibril formation; Crosslinking of collagen fibrils; Non-integrin membrane-ECM interactions	15	0
Low	Q04857	Collagen alpha-1(VI) chain OS=Mus musculus OX=10090 GN=Col6a1 PE=1 SV=1	0.21	0.826	2	1	1	1	1025	108.4	5.36	0	1	Pf00092, Pf01391	12833	ENSMUSG00000001119	Col6a1	mmu:12833; Q04857		Collagen degradation; ECM proteoglycans; Signaling by PDGF; Assembly of collagen fibrils and other multimeric structures; Integrin cell surface interactions; NCAM1 interactions; Collagen chain trimerization	8	0
High	Q60847	Collagen alpha-1(XII) chain OS=Mus musculus OX=10090 GN=Col12a1 PE=2 SV=3	0.005	3.849	2	3	3	3	3120	340	5.64	0	3	Pf00041, Pf00092, Pf01391	12816	ENSMUSG00000032332	Col12a1	mmu:12816; P70322; Q60847		Assembly of collagen fibrils and other multimeric structures; Collagen chain trimerization; Collagen degradation	4	0
Low	O35206	Collagen alpha-1(XV) chain OS=Mus musculus OX=10090 GN=Col15a1 PE=1 SV=2	0.169	0.948	1	1	1	1	1367	140.4	4.89	2.14	1	Pf01391, Pf20010	12819	ENSMUSG00000028339	Col15a1	A2AJY3; mmu:12819; O35206; Q3UZ71; Q9EQD9		Assembly of collagen fibrils and other multimeric structures; Collagen chain trimerization; Collagen degradation	4	0
Medium	Q30D77	Collagen alpha-1(XXIV) chain OS=Mus musculus OX=10090 GN=Col24a1 PE=2 SV=2	0.029	2.085	2	2	2	2	1733	175.6	7.34	2.24	2	Pf01391, Pf01410	71355	ENSMUSG00000028197	Col24a1	B2RT51; E9QNS5; mmu:71355; Q30D77		Assembly of collagen fibrils and other multimeric structures; Collagen chain trimerization; MET activates PTK2 signaling	4	0
Low	Q5QNQ9	Collagen alpha-1(XXVII) chain OS=Mus musculus OX=10090 GN=Col27a1 PE=2 SV=1	0.07	1.534	2	1	1	1	1845	186.2	9.82	2.53	1	Pf01391, Pf01410	373864	ENSMUSG00000045672	Col27a1	mmu:373864; Q5QNQ9; Q69Z83; Q80UA8		Assembly of collagen fibrils and other multimeric structures; Collagen chain trimerization; MET activates PTK2 signaling	4	0
High	P08122	Collagen alpha-2(IV) chain OS=Mus musculus OX=10090 GN=Col4a2 PE=1 SV=4	0.003	4.402	2	2	3	2	1707	167.2	8.48	4.8	2	Pf01391	12827	ENSMUSG00000031503	Col4a2	mmu:12827; P08122; Q3B7C2; Q3TPV9; Q61375; Q66JS5; Q6RCT6; Q6RCT7; Q6U9X1; Q8BPI9; Q8BPK3; Q91VI3	Focal Adhesion-PI3K-Akt-mTOR-signaling pathway; Dysregulated miRNA Targeting in Insulin/PI3K-AKT Signaling; Focal Adhesion	Laminin interactions; Signaling by PDGF; Integrin cell surface interactions; NCAM1 interactions; Collagen chain trimerization; Collagen degradation; Anchoring fibril formation; Crosslinking of collagen fibrils; Non-integrin membrane-ECM interactions	15	0
Low	Q9QZS0	Collagen alpha-3(IV) chain OS=Mus musculus OX=10090 GN=Col4a3 PE=1 SV=2	0.203	0.845	1	1	1	1	1669	161.6	9.48	2.04	1	Pf01391	12828	ENSMUSG00000079465	Col4a3	mmu:12828; Q61430; Q61435; Q8CCD6; Q9QZS0	Primary Focal Segmental Glomerulosclerosis FSGS; mRNA processing	Laminin interactions; Signaling by PDGF; Integrin cell surface interactions; NCAM1 interactions; Collagen chain trimerization; Collagen degradation; Anchoring fibril formation; Crosslinking of collagen fibrils; Non-integrin membrane-ECM interactions	14	0
High	A2AX52	Collagen alpha-4(VI) chain OS=Mus musculus OX=10090 GN=Col6a4 PE=1 SV=2	0.004	4.139	3	4	6	4	2309	250.6	6.81	5.02	4	Pf00092, Pf01391, Pf13519	68553	ENSMUSG00000032572	Col6a4	A2AX52; A2AX53; A2AX54; A9CR35; mmu:68553			0	0
Low	Q3MI99	Collagen and calcium-binding EGF domain-containing protein 1 OS=Mus musculus OX=10090 GN=Ccbe1 PE=2 SV=2	0.088	1.36	2	1	1	1	408	44.3	7.09	0	1	Pf01391	320924	ENSMUSG00000046318	Ccbe1	A7MCU5; mmu:320924; Q3MI99; Q5DTT5; Q8BFW1; Q8BMT1			0	0
Low	Q8K4M5	COMM domain-containing protein 1 OS=Mus musculus OX=10090 GN=Commd1 PE=1 SV=2	0.144	1.037	5	1	1	1	188	21	7.59	1.79	1	Pf07258	17846	ENSMUSG00000051355	Commd1	mmu:17846; Q3V012; Q80WG2; Q80Z41; Q8BNL9; Q8K2S9; Q8K4M5	TNF-alpha NF-kB Signaling Pathway	Neddylation	2	0
Medium	Q63829	COMM domain-containing protein 3 OS=Mus musculus OX=10090 GN=Commd3 PE=1 SV=1	0.041	1.892	11	1	2	1	195	22	5.59	2.43	1	Pf07258	12238	ENSMUSG00000051154	Commd3	A2ASR4; mmu:12238; Q3UKI1; Q63829; Q8C9P5		Neutrophil degranulation; Neddylation	2	0
Low	Q3V4B5	COMM domain-containing protein 6 OS=Mus musculus OX=10090 GN=Commd6 PE=1 SV=1	0.093	1.314	10	1	1	1	87	9.8	5.38	0	1	Pf07258	66200	ENSMUSG00000075486	Commd6	mmu:66200; Q3V4B5		Neddylation	1	0
High	P14106	Complement C1q subcomponent subunit B OS=Mus musculus OX=10090 GN=C1qb PE=1 SV=2	0.003	4.564	5	1	3	1	253	26.7	8.15	6.6	1	Pf00386, Pf01391	12260	ENSMUSG00000036905	C1qb	mmu:12260; P14106; Q3U793	Oxidative Damage; Complement Activation, Classical Pathway; Microglia Pathogen Phagocytosis Pathway	Initial triggering of complement; Classical antibody-mediated complement activation; Regulation of Complement cascade	6	0
Medium	Q8CFR0	Complement C1q-like protein 2 OS=Mus musculus OX=10090 GN=C1ql2 PE=1 SV=1	0.01	2.817	3	1	2	1	287	29.3	5.8	0	1	Pf00386	226359	ENSMUSG00000036907	C1ql2	mmu:226359; Q8CFR0			0	0
Low	Q3UZ09	Complement C1r subcomponent-like protein OS=Mus musculus OX=10090 GN=C1rl PE=1 SV=1	0.187	0.886	5	1	1	1	482	53.4	6.47	0	1	Pf00089, Pf00431	232371	ENSMUSG00000038527	C1rl	mmu:232371; Q3UZ09; Q3V019; Q7TT43; Q7TT44			0	0
Low	P06684	Complement C5 OS=Mus musculus OX=10090 GN=C5 PE=1 SV=2	0.205	0.841	1	1	1	1	1680	188.8	6.81	0	1	Pf00207, Pf01821, Pf01835, Pf07677, Pf07678, Pf07703, Pf17789, Pf17790, Pf17791	15139	ENSMUSG00000026874	C5	A2AS36; mmu:15139; P06684	Oxidative Damage; Complement Activation, Classical Pathway; Spinal Cord Injury	G alpha (i) signalling events; Regulation of Complement cascade; Terminal pathway of complement; Peptide ligand-binding receptors; Activation of C3 and C5	8	0
Low	Q64735	Complement component receptor 1-like protein OS=Mus musculus OX=10090 GN=Cr1l PE=1 SV=1	0.069	1.543	1	1	1	1	483	53.7	6.65	2.22	1	Pf00084	12946	ENSMUSG00000016481	Cr1l	E9QL18; mmu:12946; Q3TV30; Q58E68; Q61447; Q61449; Q64735; Q8CF59; Q8K328	Primary Focal Segmental Glomerulosclerosis FSGS		1	0
High	Q8JZN5	Complex I assembly factor ACAD9, mitochondrial OS=Mus musculus OX=10090 GN=Acad9 PE=1 SV=2	0	14.601	14	6	8	6	625	68.7	7.46	12.55	6	Pf00441, Pf02770, Pf02771	229211	ENSMUSG00000027710	Acad9	mmu:229211; Q3ULL9; Q8BK76; Q8C0B5; Q8JZN5		Complex I biogenesis	1	0
High	Q8BUY5	Complex I assembly factor TIMMDC1, mitochondrial OS=Mus musculus OX=10090 GN=Timmdc1 PE=1 SV=1	0	6.652	9	2	3	2	285	31.8	9.29	7.6	2	Pf02466	76916	ENSMUSG00000002846	Timmdc1	mmu:76916; Q8BUY5; Q99LS9; Q9CSI1		Complex I biogenesis	1	0
High	P63040	Complexin-1 OS=Mus musculus OX=10090 GN=Cplx1 PE=1 SV=1	0	24.735	62	6	24	3	134	15.1	4.97	44.11	6		12889	ENSMUSG00000033615	Cplx1	mmu:12889; O09057; O09142; P63040; Q3UYB3; Q64276; Q91WJ3		Dopamine Neurotransmitter Release Cycle; Serotonin Neurotransmitter Release Cycle; Norepinephrine Neurotransmitter Release Cycle; Glutamate Neurotransmitter Release Cycle; Acetylcholine Neurotransmitter Release Cycle; GABA synthesis, release, reuptake and degradation	6	0
High	P84086	Complexin-2 OS=Mus musculus OX=10090 GN=Cplx2 PE=1 SV=1	0	18.779	43	6	21	3	134	15.4	5.08	31.43	6		12890	ENSMUSG00000025867	Cplx2	mmu:12890; O09056; P84086; Q13329; Q28184; Q32KK4; Q64386			0	3
High	Q8R1B5	Complexin-3 OS=Mus musculus OX=10090 GN=Cplx3 PE=1 SV=1	0	6.341	12	1	2	1	158	17.6	4.89	5.84	1		235415	ENSMUSG00000039714	Cplx3	mmu:235415; Q8R1B5; Q96AW7			0	0
Low	Q99388	Component of Sp100-rs OS=Mus musculus OX=10090 GN=Csprs PE=2 SV=1	0.066	1.577	3	1	1	1	208	24	7.88	2.14	1	Pf03172			Csprs	Q99388			0	0
Low	Q8BSP2	Condensin-2 complex subunit H2 OS=Mus musculus OX=10090 GN=Ncaph2 PE=1 SV=1	0.243	0.754	3	1	1	1	607	68.9	4.67	0	1	Pf06278	52683	ENSMUSG00000008690	Ncaph2	mmu:52683; Q3TNI4; Q8BSP2; Q8C2N3; Q8C3K9; Q8C4X8; Q8CAZ3; Q99L21; Q9CT99		Condensation of Prophase Chromosomes	1	0
High	Q80YA9	Connector enhancer of kinase suppressor of ras 2 OS=Mus musculus OX=10090 GN=Cnksr2 PE=1 SV=1	0	83.611	22	22	56	22	1032	117.3	6.79	141.27	22	Pf00536, Pf00595	245684	ENSMUSG00000025658	Cnksr2	mmu:245684; Q80TP2; Q80YA9		MAP2K and MAPK activation	1	0
Low	Q8R1U1	Conserved oligomeric Golgi complex subunit 4 OS=Mus musculus OX=10090 GN=Cog4 PE=1 SV=1	0.093	1.315	1	1	1	1	785	88.6	5.15	0	1		102339	ENSMUSG00000031753	Cog4	mmu:102339; Q3T9K1; Q8R1U1		COPI-mediated anterograde transport; Retrograde transport at the Trans-Golgi-Network; Intra-Golgi traffic	3	0
Low	Q8C0L8	Conserved oligomeric Golgi complex subunit 5 OS=Mus musculus OX=10090 GN=Cog5 PE=1 SV=3	0.089	1.351	1	1	1	1	829	91.3	6.27	0	1		238123	ENSMUSG00000035933	Cog5	E9QM30; mmu:238123; Q8C0L8		COPI-mediated anterograde transport; Retrograde transport at the Trans-Golgi-Network; Intra-Golgi traffic	3	0
Medium	Q3UM29	Conserved oligomeric Golgi complex subunit 7 OS=Mus musculus OX=10090 GN=Cog7 PE=1 SV=1	0.049	1.772	2	2	2	2	770	86	5.38	0	2	Pf10191	233824		Cog7	mmu:233824; Q3U3L7; Q3UM29		Intra-Golgi traffic; Retrograde transport at the Trans-Golgi-Network; COPI-mediated anterograde transport	3	0
High	Q8CBC4	Consortin OS=Mus musculus OX=10090 GN=Cnst PE=1 SV=1	0	12.462	8	4	4	4	711	76.8	4.59	6.08	4	Pf15281	226744	ENSMUSG00000038949	Cnst	mmu:226744; Q8BFS5; Q8CBC4; Q8K053			0	0
High	Q6A0A9	Constitutive coactivator of PPAR-gamma-like protein 1 OS=Mus musculus OX=10090 GN=FAM120A PE=1 SV=2	0	32.421	15	13	18	12	1112	121.6	8.92	25.41	13		218236	ENSMUSG00000038014	FAM120A	A0PJK6; B3DFJ0; mmu:218236; Q6A0A9; Q91Z16			0	1
High	Q8C3F2	Constitutive coactivator of PPAR-gamma-like protein 2 OS=Mus musculus OX=10090 GN=Fam120c PE=1 SV=3	0.003	4.635	2	2	2	1	1091	119.6	8.46	2.58	2		207375	ENSMUSG00000025262	Fam120c	mmu:207375; Q3U0F6; Q8C3F2			0	0
High	P12960	Contactin-1 OS=Mus musculus OX=10090 GN=Cntn1 PE=1 SV=1	0	79.833	29	23	49	23	1020	113.3	6.16	108.61	23	Pf00047, Pf13927	12805	ENSMUSG00000055022	Cntn1	mmu:12805; P12960; Q6NXV7; Q8BR42; Q8C6A0	Delta-Notch Signaling Pathway		1	0
High	Q07409	Contactin-3 OS=Mus musculus OX=10090 GN=Cntn3 PE=1 SV=2	0.004	4.115	2	2	3	1	1028	113.2	6.23	0	2	Pf13927	18488	ENSMUSG00000030075	Cntn3	G5E878; mmu:18488; Q07409		Post-translational modification: synthesis of GPI-anchored proteins	1	0
High	Q69Z26	Contactin-4 OS=Mus musculus OX=10090 GN=Cntn4 PE=1 SV=2	0.003	4.337	2	2	3	1	1026	113.4	7.36	0	2	Pf13927	269784	ENSMUSG00000064293	Cntn4	mmu:269784; Q14BL8; Q69Z26; Q8BRT6; Q8CBD3			0	1
High	O54991	Contactin-associated protein 1 OS=Mus musculus OX=10090 GN=Cntnap1 PE=1 SV=2	0	19.337	5	7	14	7	1385	156.2	7.06	28.99	7	Pf00754, Pf02210	53321	ENSMUSG00000017167	Cntnap1	A2A4K6; mmu:53321; O54991			0	0
High	Q0V8T9	Contactin-associated protein like 5-1 OS=Mus musculus OX=10090 GN=Cntnap5a PE=1 SV=1	0	5.984	2	2	4	2	1304	145.6	6.28	6.36	2	Pf00754, Pf02210	636808	ENSMUSG00000070695	Cntnap5a	mmu:636808; Q0V8T9			0	0
High	Q9CPW0	Contactin-associated protein-like 2 OS=Mus musculus OX=10090 GN=Cntnap2 PE=1 SV=2	0	14.783	4	3	4	3	1332	148.1	6.77	12.3	3	Pf00754, Pf02210	66797	ENSMUSG00000039419	Cntnap2	mmu:66797; Q6P2K4; Q6ZQ31; Q9CPW0			0	0
Low	Q99P47	Contactin-associated protein-like 4 OS=Mus musculus OX=10090 GN=Cntnap4 PE=1 SV=2	0.083	1.387	1	1	1	1	1310	144.6	7.06	0	1	Pf00754, Pf02210	170571	ENSMUSG00000031772	Cntnap4	mmu:170571; Q8K002; Q99P47			0	0
High	Q99LD4	COP9 signalosome complex subunit 1 OS=Mus musculus OX=10090 GN=Gps1 PE=1 SV=1	0	22.579	20	8	15	8	471	53.4	6.84	20.68	8	Pf01399			Gps1	B0QZT1; Q8C2J7; Q99LD4		Neddylation; DNA Damage Recognition in GG-NER; Formation of TC-NER Pre-Incision Complex; Cargo recognition for clathrin-mediated endocytosis; RHOBTB1 GTPase cycle	5	0
High	P61202	COP9 signalosome complex subunit 2 OS=Mus musculus OX=10090 GN=Cops2 PE=1 SV=1	0	22.954	19	9	13	9	443	51.6	5.53	13.07	9	Pf01399	12848	ENSMUSG00000027206	Cops2	mmu:12848; O88950; P61202; Q15647; Q3V1W6; Q8R5B0; Q9CWU1; Q9R249; Q9UNQ5		Neddylation; DNA Damage Recognition in GG-NER; Formation of TC-NER Pre-Incision Complex; Cargo recognition for clathrin-mediated endocytosis; RHOBTB1 GTPase cycle	5	0
High	O88543	COP9 signalosome complex subunit 3 OS=Mus musculus OX=10090 GN=Cops3 PE=1 SV=3	0	21.92	12	4	10	4	423	47.8	6.65	24.71	4	Pf01399	26572	ENSMUSG00000019373	Cops3	mmu:26572; O88543	TNF-alpha NF-kB Signaling Pathway	Neddylation; DNA Damage Recognition in GG-NER; Formation of TC-NER Pre-Incision Complex; Cargo recognition for clathrin-mediated endocytosis	5	0
High	O88544	COP9 signalosome complex subunit 4 OS=Mus musculus OX=10090 GN=Cops4 PE=1 SV=1	0	16.336	19	7	13	6	406	46.3	5.83	22.34	7	Pf01399	26891	ENSMUSG00000035297	Cops4	mmu:26891; O88544		Neddylation; DNA Damage Recognition in GG-NER; Formation of TC-NER Pre-Incision Complex; Cargo recognition for clathrin-mediated endocytosis; RHOBTB1 GTPase cycle	5	0
High	O35864	COP9 signalosome complex subunit 5 OS=Mus musculus OX=10090 GN=Cops5 PE=1 SV=3	0	16.107	21	6	10	6	334	37.5	6.54	17.01	6	Pf01398, Pf18323	26754	ENSMUSG00000025917	Cops5	mmu:26754; O35864; Q3UA70; Q8C1S1		Neddylation; DNA Damage Recognition in GG-NER; Formation of TC-NER Pre-Incision Complex; Cargo recognition for clathrin-mediated endocytosis	4	0
High	O88545	COP9 signalosome complex subunit 6 OS=Mus musculus OX=10090 GN=Cops6 PE=1 SV=1	0	6.172	5	1	4	1	324	35.9	5.73	8.97	1	Pf01398	26893	ENSMUSG00000019494	Cops6	mmu:26893; O88545		Neddylation; Cargo recognition for clathrin-mediated endocytosis; DNA Damage Recognition in GG-NER; Formation of TC-NER Pre-Incision Complex	4	0
High	Q9CZ04	COP9 signalosome complex subunit 7a OS=Mus musculus OX=10090 GN=Cops7a PE=1 SV=2	0.001	5.39	8	2	3	2	275	30.2	7.87	2.81	2	Pf18392	26894	ENSMUSG00000030127	Cops7a	mmu:26894; O88546; Q925R8; Q9CPQ4; Q9CWD2; Q9CZ04		Cargo recognition for clathrin-mediated endocytosis; Neddylation; Formation of TC-NER Pre-Incision Complex; DNA Damage Recognition in GG-NER	4	0
High	Q8VBV7	COP9 signalosome complex subunit 8 OS=Mus musculus OX=10090 GN=Cops8 PE=1 SV=1	0	10.208	22	3	9	3	209	23.2	5.2	15.59	3	Pf10075	108679	ENSMUSG00000034432	Cops8	mmu:108679; Q3TRS9; Q80XF4; Q8R4D2; Q8VBV7		Neddylation; Cargo recognition for clathrin-mediated endocytosis; DNA Damage Recognition in GG-NER; Formation of TC-NER Pre-Incision Complex	4	0
High	Q8C166	Copine-1 OS=Mus musculus OX=10090 GN=Cpne1 PE=1 SV=1	0.002	4.787	5	3	3	3	536	58.8	5.66	2.52	3	Pf07002	266692	ENSMUSG00000074643	Cpne1	mmu:266692; Q8C166; Q925K4; Q925K5		Neutrophil degranulation; Glycerophospholipid biosynthesis	2	0
High	P59108	Copine-2 OS=Mus musculus OX=10090 GN=Cpne2 PE=1 SV=1	0	13.864	9	4	10	3	548	61	5.96	25.24	4	Pf07002	234577	ENSMUSG00000034361	Cpne2	mmu:234577; P59108; Q8K1D7			0	0
High	Q8BLR2	Copine-4 OS=Mus musculus OX=10090 GN=Cpne4 PE=1 SV=1	0	37.806	20	10	23	9	557	62.4	6.33	48.74	10	Pf07002	74020	ENSMUSG00000032564	Cpne4	mmu:74020; Q8BLR2			0	0
High	Q8JZW4	Copine-5 OS=Mus musculus OX=10090 GN=Cpne5 PE=1 SV=1	0	68.79	33	20	52	11	593	65.6	5.77	107.41	20	Pf07002	240058	ENSMUSG00000024008	Cpne5	mmu:240058; Q8JZW4			0	9
High	Q9Z140	Copine-6 OS=Mus musculus OX=10090 GN=Cpne6 PE=1 SV=1	0	31.976	18	10	21	9	557	61.7	5.59	47.38	10	Pf07002	12891	ENSMUSG00000022212	Cpne6	mmu:12891; Q9Z140		Glycerophospholipid biosynthesis	1	0
High	Q0VE82	Copine-7 OS=Mus musculus OX=10090 GN=Cpne7 PE=1 SV=1	0	20.43	13	6	11	5	557	61.9	5.4	21.34	6	Pf07002	102278	ENSMUSG00000034796	Cpne7	mmu:102278; Q0VE82		Glycerophospholipid biosynthesis	1	0
High	Q9DC53	Copine-8 OS=Mus musculus OX=10090 GN=Cpne8 PE=2 SV=3	0	54.853	29	14	34	6	577	64.6	5.97	78.97	14	Pf07002	66871	ENSMUSG00000052560	Cpne8	B2RS65; mmu:66871; Q9CUZ8; Q9DC53		CDC42 GTPase cycle; RHOD GTPase cycle; RHOQ GTPase cycle	3	0
High	Q9WU84	Copper chaperone for superoxide dismutase OS=Mus musculus OX=10090 GN=Ccs PE=1 SV=1	0	14.744	25	6	7	6	274	28.9	6.1	14.7	6	Pf00080, Pf00403	12460	ENSMUSG00000034108	Ccs	mmu:12460; Q9CRJ9; Q9WU84		Detoxification of Reactive Oxygen Species	1	0
High	O08997	Copper transport protein ATOX1 OS=Mus musculus OX=10090 GN=Atox1 PE=1 SV=1	0.002	5.079	32	2	3	2	68	7.3	6.51	5.25	2	Pf00403	11927	ENSMUSG00000018585	Atox1	mmu:11927; O08997; Q5NCU2		Ion influx/efflux at host-pathogen interface	1	0
High	Q64430	Copper-transporting ATPase 1 OS=Mus musculus OX=10090 GN=Atp7a PE=1 SV=3	0.009	3.034	1	2	3	2	1491	161.9	6.62	1.81	2	Pf00702	11977	ENSMUSG00000033792	Atp7a	A2AG69; mmu:11977; O35101; P97422; Q64430; Q64431		Ion influx/efflux at host-pathogen interface; Ion transport by P-type ATPases	2	0
High	Q9QZQ8	Core histone macro-H2A.1 OS=Mus musculus OX=10090 GN=H2afy PE=1 SV=3	0	29.128	32	10	20	9	372	39.7	9.8	40.71	10	Pf01661, Pf16211	26914	ENSMUSG00000015937	Macroh2a1	mmu:26914; Q91VZ2; Q9QZQ7; Q9QZQ8			0	0
High	Q8CCK0	Core histone macro-H2A.2 OS=Mus musculus OX=10090 GN=H2afy2 PE=1 SV=3	0	38.117	42	13	21	12	372	40.1	9.69	37.76	13	Pf01661, Pf16211	404634	ENSMUSG00000020086	Macroh2a2	A0JP36; mmu:404634; Q3TNT4; Q8CCK0; Q925I6			0	1
Low	Q9DA19	Corepressor interacting with RBPJ 1 OS=Mus musculus OX=10090 GN=Cir1 PE=1 SV=2	0.133	1.079	4	1	1	1	450	51.8	9.92	0	1	Pf10197	66935	ENSMUSG00000041777	Cir1	mmu:66935; Q3V2N9; Q4KL44; Q52KL9; Q5FW66; Q9DA19	Delta-Notch Signaling Pathway; Notch Signaling Pathway		2	0
Low	Q7TPC1	Corneodesmosin OS=Mus musculus OX=10090 GN=Cdsn PE=2 SV=2	0.113	1.194	2	1	1	1	561	54.3	9.28	2.17	1		386463	ENSMUSG00000039518	Cdsn	E9QLN3; mmu:386463; Q7TPC1		Formation of the cornified envelope	1	0
High	O89053	Coronin-1A OS=Mus musculus OX=10090 GN=Coro1a PE=1 SV=5	0	37.62	26	15	34	13	461	51	6.48	56.64	15	Pf00400, Pf08953, Pf08954	12721	ENSMUSG00000030707	Coro1a	mmu:12721; O89053; Q7TMU0; Q9R1Y8; Q9R288			0	2
High	Q9WUM3	Coronin-1B OS=Mus musculus OX=10090 GN=Coro1b PE=1 SV=1	0	18.494	13	6	18	5	484	53.9	5.78	26.87	6	Pf00400, Pf08953	23789	ENSMUSG00000024835; ENSMUSG00000097771	Coro1b	mmu:23789; Q3UEB1; Q9CVA2; Q9WUM3			0	0
High	Q9WUM4	Coronin-1C OS=Mus musculus OX=10090 GN=Coro1c PE=1 SV=2	0	36.869	28	14	32	12	474	53.1	7.08	50.38	14	Pf00400, Pf08953	23790	ENSMUSG00000004530	Coro1c	mmu:23790; Q499X7; Q8VCQ5; Q9WUM4			0	0
High	Q8C0P5	Coronin-2A OS=Mus musculus OX=10090 GN=Coro2a PE=2 SV=1	0.002	5.105	6	2	2	2	524	59.5	7.71	4.31	2	Pf00400, Pf08953	107684	ENSMUSG00000028337	Coro2a	mmu:107684; Q3U6H8; Q8BW42; Q8C0P5			0	0
High	Q8BH44	Coronin-2B OS=Mus musculus OX=10090 GN=Coro2b PE=1 SV=2	0	15.177	15	6	9	6	480	54.9	8.27	11.28	6	Pf00400, Pf08953	235431	ENSMUSG00000041729	Coro2b	mmu:235431; Q6P5U9; Q8BH44			0	0
High	Q9D2V7	Coronin-7 OS=Mus musculus OX=10090 GN=Coro7 PE=1 SV=2	0	11.365	7	5	6	5	922	100.7	5.77	6.27	5	Pf00400, Pf08953	78885	ENSMUSG00000039637	Coro7	mmu:78885; Q3UDJ4; Q6P8Y8; Q8C9V7; Q9D2V7			0	0
Low	Q9D273	Corrinoid adenosyltransferase OS=Mus musculus OX=10090 GN=Mmab PE=1 SV=1	0.161	0.969	3	1	1	1	237	26.3	9.2	0	1	Pf01923	77697	ENSMUSG00000029575	Mmab	mmu:77697; Q3UFL6; Q8CBZ0; Q8VBZ4; Q9D273		Cobalamin (Cbl, vitamin B12) transport and metabolism	1	0
High	B9EJA2	Cortactin-binding protein 2 OS=Mus musculus OX=10090 GN=Cttnbp2 PE=1 SV=2	0	47.488	11	16	29	16	1648	178.7	8.19	54.09	16	Pf09727, Pf12796	30785	ENSMUSG00000000416	Cttnbp2	B9EJA2; G3X9L7; mmu:30785; Q69ZB2; Q8BVG1; Q8C044			0	0
Low	Q8K129	Cortexin-1 OS=Mus musculus OX=10090 GN=Ctxn1 PE=3 SV=1	0.103	1.251	10	1	1	1	82	9.1	5.24	1.61	1	Pf11057	330695	ENSMUSG00000048644	Ctxn1	mmu:330695; Q8K129			0	0
Low	Q3URE8	Cortexin-2 OS=Mus musculus OX=10090 GN=Ctxn2 PE=3 SV=2	0.255	0.723	15	1	1	1	81	9	4.5	0	1	Pf11057	381418	ENSMUSG00000074872	Ctxn2	mmu:381418; Q3URE8			0	0
Low	Q06770	Corticosteroid-binding globulin OS=Mus musculus OX=10090 GN=Serpina6 PE=1 SV=1	0.208	0.833	4	1	1	1	397	44.7	5.24	0	1	Pf00079	12401	ENSMUSG00000060807	Serpina6	mmu:12401; Q06770		Glucocorticoid biosynthesis	1	0
High	P97792	Coxsackievirus and adenovirus receptor homolog OS=Mus musculus OX=10090 GN=Cxadr PE=1 SV=1	0	48.682	29	11	35	11	365	39.9	6.96	65.1	11	Pf00047, Pf07686	13052	ENSMUSG00000022865	Cxadr	mmu:13052; O09052; P97792; Q3ULD0; Q91W66; Q99KG0; Q9DBJ8		Immunoregulatory interactions between a Lymphoid and a non-Lymphoid cell; Cell surface interactions at the vascular wall	2	0
Low	Q3V0P1	CPX chromosomal region candidate gene 1 protein homolog OS=Mus musculus OX=10090 GN=Cpxcr1 PE=2 SV=2	0.205	0.84	5	1	1	1	322	37.7	7.24	0	1		382239	ENSMUSG00000072995	Cpxcr1	A2BEE6; B2RW29; mmu:382239; Q3V0P1			0	0
High	O88271	Craniofacial development protein 1 OS=Mus musculus OX=10090 GN=Cfdp1 PE=1 SV=1	0	7.124	15	3	4	3	295	32.9	4.86	9.5	3		23837	ENSMUSG00000031954	Cfdp1	mmu:23837; O70565; O88271; Q9JMA5			0	0
High	Q04447	Creatine kinase B-type OS=Mus musculus OX=10090 GN=Ckb PE=1 SV=1	0	122.872	61	22	126	20	381	42.7	5.67	329.43	22	Pf02807	12709	ENSMUSG00000001270	Ckb	mmu:12709; Q04447; Q3KQP4; Q3TKI3; Q3U5P5; Q3UF71; Q9CXK6		Creatine metabolism; RND3 GTPase cycle	2	1
High	P30275	Creatine kinase U-type, mitochondrial OS=Mus musculus OX=10090 GN=Ckmt1 PE=1 SV=1	0	46.367	33	14	29	12	418	47	8.16	65.04	14	Pf02807	12716	ENSMUSG00000000308	Ckmt1	mmu:12716; P30275		Creatine metabolism	1	0
High	Q68ED7	CREB-regulated transcription coactivator 1 OS=Mus musculus OX=10090 GN=Crtc1 PE=1 SV=1	0	19.91	13	6	14	6	630	66.9	6.05	32.6	6		382056	ENSMUSG00000003575	Crtc1	mmu:382056; Q68ED7; Q6ZQ85			0	0
High	P47941	Crk-like protein OS=Mus musculus OX=10090 GN=Crkl PE=1 SV=2	0	29.785	40	8	16	8	303	33.8	6.74	34.88	8		12929	ENSMUSG00000006134	Crkl	mmu:12929; P47941; Q3TQ18; Q8BGC5	IL-5 Signaling Pathway; Signaling of Hepatocyte Growth Factor Receptor; Chemokine signaling pathway; IL-3 Signaling Pathway; Dysregulated miRNA Targeting in Insulin/PI3K-AKT Signaling; Kit Receptor Signaling Pathway; IL-2 Signaling Pathway; MAPK signaling pathway; EGFR1 Signaling Pathway; Focal Adhesion	Regulation of signaling by CBL; MET activates RAP1 and RAC1; MET receptor recycling; Frs2-mediated activation; Downstream signal transduction; Erythropoietin activates RAS	16	0
Low	Q8BJW7	Crossover junction endonuclease EME1 OS=Mus musculus OX=10090 GN=Eme1 PE=1 SV=1	0.123	1.127	3	1	1	1	570	63.4	8.88	0	1		268465	ENSMUSG00000039055	Eme1	mmu:268465; Q8BJW7		Fanconi Anemia Pathway; Resolution of D-loop Structures through Holliday Junction Intermediates	2	0
Medium	Q3TWI9	CSC1-like protein 2 OS=Mus musculus OX=10090 GN=Tmem63b PE=1 SV=1	0.035	1.982	1	1	1	1	832	94.7	7.49	2.35	1	Pf02714, Pf13967, Pf14703	224807	ENSMUSG00000036026	Tmem63b	mmu:224807; Q3TWI9; Q6PCL2; Q6PGA4; Q8C1V5; Q8R0W7			0	0
Low	Q5SUQ9	CST complex subunit CTC1 OS=Mus musculus OX=10090 GN=Ctc1 PE=1 SV=2	0.243	0.755	1	1	1	1	1212	133.9	8.12	0	1	Pf15489	68964	ENSMUSG00000020898	Ctc1	B2RW14; mmu:68964; Q3UKQ1; Q5SUQ9; Q6P9S2; Q8BRK2; Q91WN0; Q9CW32		Polymerase switching on the C-strand of the telomere; Telomere C-strand synthesis initiation	2	0
High	P70698	CTP synthase 1 OS=Mus musculus OX=10090 GN=Ctps1 PE=1 SV=2	0	23.192	13	7	14	6	591	66.6	6.58	34.4	7	Pf06418	51797	ENSMUSG00000028633	Ctps1	mmu:51797; P70698; Q922Y4		Interconversion of nucleotide di- and triphosphates	1	1
High	P70303	CTP synthase 2 OS=Mus musculus OX=10090 GN=Ctps2 PE=1 SV=1	0	8.014	7	5	8	4	586	65.5	6.49	11.02	5	Pf06418	55936	ENSMUSG00000031360	Ctps2	mmu:55936; P70303; Q3TPQ2; Q3TT59		Interconversion of nucleotide di- and triphosphates	1	0
High	Q99LJ0	CTTNBP2 N-terminal-like protein OS=Mus musculus OX=10090 GN=Cttnbp2nl PE=1 SV=1	0	35.573	21	12	21	12	638	69.8	7.71	39.13	12	Pf09727	80281	ENSMUSG00000062127	Cttnbp2nl	mmu:80281; Q6ZPR0; Q8BSV1; Q922L8; Q99LJ0			0	0
Low	Q80T79	CUB and sushi domain-containing protein 3 OS=Mus musculus OX=10090 GN=Csmd3 PE=1 SV=3	0.247	0.743	0	1	1	1	3707	405.5	5.95	0	1	Pf00084, Pf00431	239420	ENSMUSG00000022311	Csmd3	mmu:239420; Q3USM6; Q80T79; Q8BVJ0; Q9D588			0	0
High	Q9Z0H4	CUGBP Elav-like family member 2 OS=Mus musculus OX=10090 GN=Celf2 PE=1 SV=1	0	9.268	8	4	4	4	508	54.2	8.76	6.09	4	Pf00076	14007	ENSMUSG00000002107	Celf2	A2AS10; A2AS11; A2AS15; mmu:14007; Q3TNX4; Q3TTI4; Q3TUB8; Q3U668; Q3U7J8; Q3U9F2; Q3UVH4; Q9R0B2; Q9Z0H4; Q9Z187	mRNA processing		1	0
High	Q8CIN6	CUGBP Elav-like family member 3 OS=Mus musculus OX=10090 GN=Celf3 PE=2 SV=1	0.009	2.942	3	1	1	1	465	50.5	8.68	2.45	1	Pf00076	78784	ENSMUSG00000028137	Celf3	mmu:78784; Q6PFH2; Q8CIN6	mRNA processing		1	0
Medium	Q7TSY6	CUGBP Elav-like family member 4 OS=Mus musculus OX=10090 GN=Celf4 PE=1 SV=2	0.013	2.616	3	2	3	2	486	51.9	8	5.65	2	Pf00076	108013	ENSMUSG00000024268	Celf4	mmu:108013; Q7TSY6; Q80Y76; Q811Z7; Q8BKM2; Q8BLM9; Q8BXA2; Q99PE0	mRNA processing		1	0
High	Q9WTX6	Cullin-1 OS=Mus musculus OX=10090 GN=Cul1 PE=1 SV=1	0	23.474	12	8	13	8	776	89.6	8	23.59	8		26965	ENSMUSG00000029686	Cul1	mmu:26965; Q9WTX6; Q9WUI7	TNF-alpha NF-kB Signaling Pathway; Delta-Notch Signaling Pathway; Wnt Signaling Pathway NetPath	Neddylation; Regulation of PLK1 Activity at G2/M Transition; Antigen processing: Ubiquitination & Proteasome degradation; Prolactin receptor signaling; Downstream TCR signaling; Orc1 removal from chromatin; Dectin-1 mediated noncanonical NF-kB signaling; NIK-->noncanonical NF-kB signaling; FCERI mediated NF-kB activation; FBXL7 down-regulates AURKA during mitotic entry and in early mitosis; Activ…	25	0
High	Q9D4H8	Cullin-2 OS=Mus musculus OX=10090 GN=Cul2 PE=1 SV=2	0	38.623	19	15	27	15	745	86.8	7.01	49.66	15		71745	ENSMUSG00000024231	Cul2	mmu:71745; Q3TUR8; Q9D4H8		Neddylation; Antigen processing: Ubiquitination & Proteasome degradation; Oxygen-dependent proline hydroxylation of Hypoxia-inducible Factor Alpha	3	0
High	Q9JLV5	Cullin-3 OS=Mus musculus OX=10090 GN=Cul3 PE=1 SV=1	0	46.388	24	17	25	16	768	88.9	8.46	39.73	17		26554	ENSMUSG00000004364	Cul3	mmu:26554; Q9JLV5		Neddylation; Antigen processing: Ubiquitination & Proteasome degradation; RHOBTB1 GTPase cycle; Regulation of RAS by GAPs; Hedgehog 'on' state; Degradation of DVL; ROS sensing by NFE2L2; RHOBTB2 GTPase cycle; RHOBTB3 ATPase cycle	9	0
High	Q3TCH7	Cullin-4A OS=Mus musculus OX=10090 GN=Cul4a PE=1 SV=1	0	8.965	6	4	6	2	759	87.7	8.35	11.2	4		99375	ENSMUSG00000031446	Cul4a	mmu:99375; Q3TCH7; Q3THM3; Q91Z44		Neddylation; DNA Damage Recognition in GG-NER; Formation of TC-NER Pre-Incision Complex; Gap-filling DNA repair synthesis and ligation in TC-NER; Formation of Incision Complex in GG-NER; Dual Incision in GG-NER; Dual incision in TC-NER; Recognition of DNA damage by PCNA-containing replication complex	8	0
High	A2A432	Cullin-4B OS=Mus musculus OX=10090 GN=Cul4b PE=1 SV=1	0	11.21	5	4	5	2	970	110.6	8.37	7.58	4		72584	ENSMUSG00000031095	Cul4b	A2A432; mmu:72584; Q3TU30; Q8BSL3; Q8CHD6; Q91YZ7; Q99KS9; Q9CZM5		Neddylation; Recognition of DNA damage by PCNA-containing replication complex; DNA Damage Recognition in GG-NER; Formation of Incision Complex in GG-NER; Dual Incision in GG-NER; Formation of TC-NER Pre-Incision Complex; Dual incision in TC-NER; Gap-filling DNA repair synthesis and ligation in TC-NER	8	1
High	Q9D5V5	Cullin-5 OS=Mus musculus OX=10090 GN=Cul5 PE=1 SV=3	0	14.575	7	6	10	6	780	90.9	7.81	14.35	6		75717		Cul5	mmu:75717; Q8BMQ6; Q8BV53; Q8C098; Q9D5V5		Neddylation; Antigen processing: Ubiquitination & Proteasome degradation; Downregulation of ERBB2 signaling; Inactivation of CSF3 (G-CSF) signaling	4	0
High	Q80TT8	Cullin-9 OS=Mus musculus OX=10090 GN=Cul9 PE=1 SV=2	0	17.894	3	5	8	5	1865	209	5.63	15.42	5	Pf01485, Pf03256			Cul9	Q80TT8; Q8BKL9; Q8CGC0; Q8R363		Neddylation	1	0
High	Q6ZQ38	Cullin-associated NEDD8-dissociated protein 1 OS=Mus musculus OX=10090 GN=Cand1 PE=1 SV=2	0	107.169	27	34	78	33	1230	136.2	5.78	133.69	34		71902	ENSMUSG00000020114	Cand1	mmu:71902; Q6PFR0; Q6ZQ38; Q9CV45		Neutrophil degranulation; Neddylation; Iron uptake and transport	3	1
High	Q6ZQ73	Cullin-associated NEDD8-dissociated protein 2 OS=Mus musculus OX=10090 GN=Cand2 PE=1 SV=2	0.009	3.133	2	2	2	1	1235	135.5	5.58	0	2		67088	ENSMUSG00000030319	Cand2	mmu:67088; Q6PHT7; Q6ZQ73			0	0
Low	Q8R373	CXADR-like membrane protein OS=Mus musculus OX=10090 GN=Clmp PE=1 SV=1	0.051	1.729	6	2	3	2	373	41.2	8.38	1.9	2	Pf07686, Pf13927	71566	ENSMUSG00000032024	Clmp	mmu:71566; Q8R373; Q920S5			0	0
Medium	Q8BHG2	CXXC motif containing zinc binding protein OS=Mus musculus OX=10090 GN=Czib PE=1 SV=1	0.045	1.801	5	1	1	1	160	18	5.12	1.97	1		74098	ENSMUSG00000028608	Czib	A2A8E3; A2A8E5; mmu:74098; Q8BHG2; Q8C7D6; Q9D1H2; Q9DCH5			0	0
Medium	Q9CWW7	CXXC-type zinc finger protein 1 OS=Mus musculus OX=10090 GN=Cxxc1 PE=1 SV=1	0.029	2.083	3	1	2	1	660	76.1	8.27	0	1	Pf00628, Pf02008, Pf12269	74322	ENSMUSG00000024560	Cxxc1	mmu:74322; Q9CWW7			0	0
Medium	Q9D5U8	Cyclic nucleotide-binding domain-containing protein 2 OS=Mus musculus OX=10090 GN=Cnbd2 PE=1 SV=2	0.017	2.417	4	2	2	1	673	77.8	8.94	4.65	2	Pf00027	70873	ENSMUSG00000038085	Cnbd2	A2ATV2; mmu:70873; Q8R083; Q9D5U8			0	0
Low	Q3UMM4	Cyclin-dependent kinase 10 OS=Mus musculus OX=10090 GN=Cdk10 PE=1 SV=1	0.162	0.964	3	1	1	1	360	40.9	8.91	2.64	1	Pf00069	234854	ENSMUSG00000033862	Cdk10	mmu:234854; Q3UMM4; Q3UZD2			0	0
Medium	P24788	Cyclin-dependent kinase 11B OS=Mus musculus OX=10090 GN=Cdk11b PE=1 SV=2	0.011	2.754	3	2	3	2	784	91.5	5.39	4.1	2	Pf00069	12537	ENSMUSG00000029062	Cdk11b	mmu:12537; P24788; Q3UI03; Q61399; Q7TST4; Q8BP53		Recruitment of mitotic centrosome proteins and complexes	1	0
High	Q69ZA1	Cyclin-dependent kinase 13 OS=Mus musculus OX=10090 GN=Cdk13 PE=1 SV=3	0.002	4.788	2	2	5	1	1511	164.5	9.69	7.51	2		69562	ENSMUSG00000041297	Cdk13	E9QKZ6; mmu:69562; Q69ZA1; Q80V11; Q8BZG1; Q8K0A4		Neutrophil degranulation; TP53 Regulates Transcription of DNA Repair Genes	2	0
High	O35495	Cyclin-dependent kinase 14 OS=Mus musculus OX=10090 GN=Cdk14 PE=1 SV=2	0	28.845	25	12	23	11	469	53	8.92	24.64	12		18647	ENSMUSG00000028926	Cdk14	mmu:18647; O35495; O35848; Q3TNN9; Q3V319; Q6ZQ37			0	0
High	Q04735	Cyclin-dependent kinase 16 OS=Mus musculus OX=10090 GN=Cdk16 PE=1 SV=1	0	19.809	19	8	13	4	496	55.9	7.87	23.54	8		18555	ENSMUSG00000031065	Cdk16	mmu:18555; Q04735			0	1
High	Q8K0D0	Cyclin-dependent kinase 17 OS=Mus musculus OX=10090 GN=Cdk17 PE=1 SV=2	0	19.166	16	8	17	5	523	59.5	9.03	27.75	8		237459	ENSMUSG00000020015	Cdk17	mmu:237459; Q8K0D0			0	2
High	Q04899	Cyclin-dependent kinase 18 OS=Mus musculus OX=10090 GN=Cdk18 PE=1 SV=1	0	9.508	10	4	7	1	451	51.8	8.51	11.19	4		18557	ENSMUSG00000026437	Cdk18	mmu:18557; Q04899			0	0
Low	Q9D0V8	Cyclin-dependent kinase 2-interacting protein OS=Mus musculus OX=10090 GN=Cinp PE=2 SV=1	0.1	1.275	3	1	1	1	212	24.1	6.43	0	1		67236	ENSMUSG00000021276	Cinp	mmu:67236; Q8C063; Q9D0V8; Q9D8P9			0	0
High	P46414	Cyclin-dependent kinase inhibitor 1B OS=Mus musculus OX=10090 GN=Cdkn1b PE=1 SV=2	0	7.9	21	3	4	3	197	22.2	7.02	5.71	3		12576	ENSMUSG00000003031	Cdkn1b	mmu:12576; P46414; Q8BG74	ErbB signaling pathway; Oxidative Damage; IL-5 Signaling Pathway; Primary Focal Segmental Glomerulosclerosis FSGS; Ovarian Infertility Genes; Focal Adhesion-PI3K-Akt-mTOR-signaling pathway; miR-222 in Exercise-Induced Cardiac Growth; Dysregulated miRNA Targeting in Insulin/PI3K-AKT Signaling; G1 to S cell cycle control	SCF(Skp2)-mediated degradation of p27/p21; Senescence-Associated Secretory Phenotype (SASP); Cyclin D associated events in G1; PTK6 Regulates Cell Cycle; DNA Damage/Telomere Stress Induced Senescence; FLT3 Signaling; AKT phosphorylates targets in the cytosol; Estrogen-dependent nuclear events downstream of ESR-membrane signaling; TP53 Regulates Transcription of Genes Involved in G1 Cell Cycle Arr…	21	0
High	Q3UTQ8	Cyclin-dependent kinase-like 5 OS=Mus musculus OX=10090 GN=Cdkl5 PE=1 SV=1	0	30.31	9	8	15	8	938	105.4	9.58	26.77	8		382253	ENSMUSG00000031292	Cdkl5	mmu:382253; Q05BK3; Q3UTQ8; Q8BWI8			0	0
High	P49615	Cyclin-dependent-like kinase 5 OS=Mus musculus OX=10090 GN=Cdk5 PE=1 SV=1	0	27.886	34	8	21	7	292	33.3	7.66	40.22	8		12568	ENSMUSG00000028969	Cdk5	mmu:12568; P49615	Alzheimers Disease; IL-6 signaling Pathway	DARPP-32 events; Regulation of TP53 Activity through Phosphorylation; CRMPs in Sema3A signaling	5	0
High	Q99KY4	Cyclin-G-associated kinase OS=Mus musculus OX=10090 GN=Gak PE=1 SV=2	0	82.204	19	27	63	24	1305	143.6	5.73	109.82	27	Pf00069, Pf00226	231580		Gak	mmu:231580; Q6P1I8; Q6P9S5; Q8BM74; Q8K0Q4; Q99KY4		Clathrin-mediated endocytosis; Golgi Associated Vesicle Biogenesis	2	3
Low	Q61458	Cyclin-H OS=Mus musculus OX=10090 GN=Ccnh PE=1 SV=2	0.158	0.983	2	1	1	1	323	37.5	7.11	0	1	Pf00134, Pf16899	66671	ENSMUSG00000021548	Ccnh	mmu:66671; Q61458; Q9CVJ0; Q9JHV7	Estrogen signaling; G1 to S cell cycle control; Eukaryotic Transcription Initiation	RNA Polymerase II Pre-transcription Events; RNA Polymerase II Promoter Escape; RNA Polymerase II Transcription Pre-Initiation And Promoter Opening; RNA Polymerase II Transcription Initiation; RNA Polymerase I Transcription Initiation; RUNX1 regulates transcription of genes involved in differentiation of HSCs; Dual incision in TC-NER; Gap-filling DNA repair synthesis and ligation in TC-NER; Format…	26	0
Medium	Q9QWV9	Cyclin-T1 OS=Mus musculus OX=10090 GN=Ccnt1 PE=1 SV=3	0.045	1.82	1	1	1	1	724	80.5	8.68	1.79	1	Pf00134	12455	ENSMUSG00000011960	Ccnt1	mmu:12455; Q3V0G4; Q9QWV9; Q9Z0U7		RNA Polymerase II Pre-transcription Events; Estrogen-dependent gene expression; Formation of RNA Pol II elongation complex ; RNA polymerase II transcribes snRNA genes; TP53 Regulates Transcription of DNA Repair Genes; SMAD2/SMAD3:SMAD4 heterotrimer regulates transcription	7	0
Medium	Q8BGU5	Cyclin-Y OS=Mus musculus OX=10090 GN=Ccny PE=1 SV=1	0.023	2.217	5	1	1	1	341	39.4	7.2	2.82	1	Pf00134	67974	ENSMUSG00000024286	Ccny	mmu:67974; Q8BGU5; Q8CI87; Q9CYN5			0	0
High	Q91WT9	Cystathionine beta-synthase OS=Mus musculus OX=10090 GN=Cbs PE=1 SV=3	0.008	3.438	2	1	1	1	561	61.5	6.48	1.98	1		12411	ENSMUSG00000024039	Cbs	mmu:12411; Q91WT9; Q91WU3	Folic Acid Network; One carbon metabolism and related pathways; Oxidative Stress and Redox Pathway; Glutathione and one carbon metabolism	Cysteine formation from homocysteine	5	0
High	Q62426	Cystatin-B OS=Mus musculus OX=10090 GN=Cstb PE=1 SV=1	0	10.376	42	4	6	4	98	11	7.39	6.44	4	Pf00031	13014	ENSMUSG00000005054	Cstb	mmu:13014; Q3UAW2; Q62426		Neutrophil degranulation	1	0
High	P21460	Cystatin-C OS=Mus musculus OX=10090 GN=Cst3 PE=1 SV=2	0	8.154	14	2	7	2	140	15.5	9	16.99	2	Pf00031	13010	ENSMUSG00000027447	Cst3	mmu:13010; P21460; Q544Y0		Regulation of Insulin-like Growth Factor (IGF) transport and uptake by Insulin-like Growth Factor Binding Proteins (IGFBPs); Post-translational protein phosphorylation; Neutrophil degranulation	3	0
High	P97315	Cysteine and glycine-rich protein 1 OS=Mus musculus OX=10090 GN=Csrp1 PE=1 SV=3	0	44.097	47	8	14	8	193	20.6	8.57	38.64	8		13007	ENSMUSG00000026421	Csrp1	mmu:13007; P97315			0	0
High	Q9D1P4	Cysteine and histidine-rich domain-containing protein 1 OS=Mus musculus OX=10090 GN=Chordc1 PE=1 SV=1	0	20.807	28	6	8	6	331	37.3	7.9	21	6	Pf04968, Pf04969	66917	ENSMUSG00000001774	Chordc1	mmu:66917; Q9CSI5; Q9D1P4			0	0
High	Q9Z1J3	Cysteine desulfurase, mitochondrial OS=Mus musculus OX=10090 GN=Nfs1 PE=1 SV=3	0	13.212	11	4	6	4	459	50.5	8.16	14.75	4		18041	ENSMUSG00000027618	Nfs1	mmu:18041; Q8C6I5; Q9Z1J3		Mitochondrial iron-sulfur cluster biogenesis; Molybdenum cofactor biosynthesis	2	0
[truncated: 4,356 more rows]

## Sheet: quantified_proteins_noNA
Protein	Gene Symbol	plex1.neonate1	plex1.neonate2	plex2.neonate3	plex2.neonate4	plex2.neonate5	plex1.earlypostnatal1	plex1.earlypostnatal2	plex1.earlypostnatal3	plex2.earlypostnatal4	plex2.earlypostnatal5	plex1.preweanling1	plex1.preweanling2	plex2.preweanling3	plex2.preweanling4	plex2.preweanling5	plex1.adult1	plex1.adult2	plex1.adult3	plex2.adult4	plex2.adult5	Description	# PSMs	# Unique Peptides	Biological Process	Cellular Component	Molecular Function
[truncated: 2,276 more rows]

[truncated: 1 more sheets: quantified_proteins_withNA]
