# Supplementary material for: Dynamic proteomic and phosphoproteomic atlas of corticostriatal axons in neurodevelopment
Source: eLife. 2022 Oct 14;11:e78847. doi: 10.7554/eLife.78847 (PMC9629834; doi:10.7554/eLife.78847)
Supplement: Supplementary file 5. [file elife-78847-supp5.xlsx]

## Sheet: log2FC_P18-CTX
Protein	Label	log2FC	SE	DF	pvalue	adj.pvalue	issue
A2A5R2	P18-CTX_H2B	0.325844	0.256923	21.7466	0.218117	0.257178	NA
A2A690	P18-CTX_H2B	1.84314	0.140447	22.3484	5.55621e-12	7.82622e-11	NA
A2A699	P18-CTX_H2B	1.37856	0.273777	22.3484	4.62853e-05	0.000114277	NA
A2A8L1	P18-CTX_H2B	-1.16964	0.632524	11.3484	0.0906338	0.115686	NA
A2A8L5	P18-CTX_H2B	2.37786	0.17844	21.9124	5.49748e-12	7.78858e-11	NA
A2A8Z1	P18-CTX_H2B	0.493993	0.208926	22.3484	0.0271478	0.0384416	NA
A2AAE1	P18-CTX_H2B	2.04222	0.169047	22.3484	2.83754e-11	3.1213e-10	NA
A2AAY5	P18-CTX_H2B	0.108387	0.248791	22.3484	0.667265	0.703671	NA
A2ACJ2	P18-CTX_H2B	1.35533	0.406787	17.4201	0.00384518	0.00647484	NA
A2ADY9	P18-CTX_H2B	0.333896	0.21338	21.8683	0.131989	0.163685	NA
A2AFR3	P18-CTX_H2B	1.14091	0.231964	22.3484	6.15769e-05	0.000148509	NA
A2AG50	P18-CTX_H2B	1.723	0.21736	21.8547	7.20083e-08	3.21542e-07	NA
A2AGT5	P18-CTX_H2B	0.856903	0.128782	22.3484	1.0042e-06	3.45282e-06	NA
A2AHC3	P18-CTX_H2B	2.04119	0.156827	22.3484	6.546e-12	9.08384e-11	NA
A2AJA9	P18-CTX_H2B	-0.568937	0.220664	21.4728	0.0173443	0.0254382	NA
A2AJI0	P18-CTX_H2B	-0.324971	0.213403	21.9401	0.142091	0.174455	NA
A2ALS5	P18-CTX_H2B	2.59835	0.135658	22.3484	2.33203e-15	1.91227e-13	NA
A2ALU4	P18-CTX_H2B	2.24626	0.174177	22.3484	7.85513e-12	1.0367e-10	NA
A2AN08	P18-CTX_H2B	1.37066	0.12624	22.3484	2.20886e-10	1.89751e-09	NA
A2AP18	P18-CTX_H2B	2.35412	0.178639	22.3484	5.11481e-12	7.40143e-11	NA
A2APV2	P18-CTX_H2B	0.164634	0.129725	22.3484	0.217463	0.256519	NA
A2AQ19	P18-CTX_H2B	-3.18416	0.307104	10.3484	8.59621e-07	3.00146e-06	NA
A2AQ25	P18-CTX_H2B	1.20498	0.163815	21.469	2.68712e-07	1.06719e-06	NA
A2AR50	P18-CTX_H2B	0.929017	0.273348	22.3484	0.00253873	0.004438	NA
A2ARP1	P18-CTX_H2B	2.53086	0.341545	15.5203	1.77629e-06	5.82622e-06	NA
A2AWA9	P18-CTX_H2B	1.42869	0.11574	22.3484	1.86174e-11	2.16217e-10	NA
A2BH40	P18-CTX_H2B	-3.76798	0.230226	20.5216	3.00767e-13	7.82515e-12	NA
A2CG49	P18-CTX_H2B	1.22549	0.130051	22.3484	3.03667e-09	1.92441e-08	NA
A2RSJ4	P18-CTX_H2B	1.66339	0.130098	21.5959	1.51428e-11	1.83751e-10	NA
A2RT62	P18-CTX_H2B	0.842028	0.172034	21.4704	7.25335e-05	0.00017187	NA
A2TJV2	P18-CTX_H2B	-0.0129553	0.280359	22.3484	0.963553	0.968565	NA
A6H630	P18-CTX_H2B	-0.16339	0.202475	20.4403	0.428977	0.473608	NA
A6H6A9	P18-CTX_H2B	0.643144	0.221787	22.3484	0.00822463	0.0128703	NA
B0V2N1	P18-CTX_H2B	2.24674	0.130416	22.3484	2.15613e-14	9.22401e-13	NA
B1AWN6	P18-CTX_H2B	2.28095	0.204837	21.9807	1.66525e-10	1.48229e-09	NA
B1AY13	P18-CTX_H2B	1.64237	0.129587	22.3484	1.10818e-11	1.4145e-10	NA
B1AZP2	P18-CTX_H2B	1.07585	0.148123	22.3484	2.56819e-07	1.02803e-06	NA
B2RQC6	P18-CTX_H2B	1.35906	0.14507	21.8002	4.24808e-09	2.57165e-08	NA
B2RR83	P18-CTX_H2B	-0.581201	0.299954	18.3942	0.0681763	0.0892526	NA
B2RRE7	P18-CTX_H2B	0.163118	0.182664	22.3484	0.381374	0.425742	NA
B2RSH2	P18-CTX_H2B	0.442141	0.244144	21.6947	0.0840139	0.107898	NA
B2RUJ5	P18-CTX_H2B	5.45064	0.162747	21.4403	5.28204e-20	1.42932e-16	NA
B2RXC1	P18-CTX_H2B	0.945966	0.217015	21.3484	0.000266457	0.000562428	NA
B9EHT4	P18-CTX_H2B	-0.660758	0.30628	10.3484	0.0554661	0.073755	NA
B9EJ80	P18-CTX_H2B	0.800138	0.12403	22.3484	1.59729e-06	5.30338e-06	NA
B9EJ86	P18-CTX_H2B	1.11521	0.190139	22.3484	6.27846e-06	1.8487e-05	NA
B9EJA2	P18-CTX_H2B	0.596501	0.124028	21.4712	8.89631e-05	0.000205932	NA
B9EKR1	P18-CTX_H2B	-1.07398	0.191646	21.6456	1.31124e-05	3.57684e-05	NA
D3YVF0	P18-CTX_H2B	0.116965	0.173928	21.5601	0.508416	0.549869	NA
D3YXK2	P18-CTX_H2B	-3.67136	0.173054	21.458	6.96223e-16	8.89671e-14	NA
D3YZI9	P18-CTX_H2B	0.326008	0.302674	20.3899	0.294017	0.336838	NA
D3YZP9	P18-CTX_H2B	1.24982	0.113867	22.3484	1.79776e-10	1.5846e-09	NA
D3YZU1	P18-CTX_H2B	-2.11524	0.158366	21.4415	7.25576e-12	9.67861e-11	NA
D3Z7P3	P18-CTX_H2B	-1.59729	0.185289	21.4113	2.08237e-08	1.03965e-07	NA
E9PUL5	P18-CTX_H2B	-0.551475	0.16548	21.4209	0.00309861	0.00533047	NA
E9PV86	P18-CTX_H2B	2.65401	0.328254	14.4387	9.81189e-07	3.38229e-06	NA
E9PVA8	P18-CTX_H2B	0.166676	0.235899	22.3484	0.487144	0.530681	NA
E9PXF8	P18-CTX_H2B	1.58772	0.301517	22.3484	2.64291e-05	6.8372e-05	NA
E9Q3L2	P18-CTX_H2B	2.11526	0.212494	21.6349	1.55413e-09	1.06294e-08	NA
E9Q401	P18-CTX_H2B	0.488976	0.280135	21.5178	0.0951632	0.121239	NA
E9Q4N7	P18-CTX_H2B	-4.02193	0.413292	21.2887	2.72638e-09	1.73999e-08	NA
E9Q4S1	P18-CTX_H2B	0.96885	0.292795	20.3484	0.00344391	0.00585746	NA
E9Q5C9	P18-CTX_H2B	-2.33254	0.240123	22.3484	1.7498e-09	1.17493e-08	NA
E9Q6P5	P18-CTX_H2B	-0.165914	0.333183	18.3579	0.62442	0.664182	NA
E9Q735	P18-CTX_H2B	-0.260243	0.293587	10.3484	0.395521	0.440263	NA
E9Q7G0	P18-CTX_H2B	-2.4509	0.18875	21.7738	9.99803e-12	1.28832e-10	NA
E9Q7X7	P18-CTX_H2B	1.66759	0.21387	22.3484	8.09433e-08	3.5907e-07	NA
E9Q8I9	P18-CTX_H2B	1.55864	0.272981	22.3484	9.08606e-06	2.58809e-05	NA
E9QAT4	P18-CTX_H2B	-0.525738	0.311912	22.3484	0.1058	0.133971	NA
F6SEU4	P18-CTX_H2B	-0.716219	0.140681	21.3914	4.58318e-05	0.000113261	NA
F6ZDS4	P18-CTX_H2B	-4.52067	0.204435	21.446	3.00996e-16	4.55096e-14	NA
F8VPU2	P18-CTX_H2B	-2.06152	0.190032	21.7506	3.06481e-10	2.52846e-09	NA
G3X9J0	P18-CTX_H2B	0.484317	0.20998	22.3484	0.0307213	0.0430066	NA
G3X9K3	P18-CTX_H2B	1.87992	0.171539	22.3484	1.8515e-10	1.62668e-09	NA
G3XA57	P18-CTX_H2B	0.0666319	0.142451	21.52	0.644662	0.683564	NA
G5E829	P18-CTX_H2B	-0.0654653	0.131179	21.3953	0.622833	0.663016	NA
G5E870	P18-CTX_H2B	-0.994758	0.242039	22.3484	0.000449199	0.000909831	NA
G5E8K5	P18-CTX_H2B	1.40678	0.173542	21.5661	5.48333e-08	2.50217e-07	NA
O08529	P18-CTX_H2B	1.46982	0.109242	22.3484	3.3791e-12	5.44276e-11	NA
O08539	P18-CTX_H2B	2.06761	0.148565	21.8473	2.44905e-12	4.06572e-11	NA
O08547	P18-CTX_H2B	-0.659289	0.205836	21.6074	0.0041678	0.00695319	NA
O08553	P18-CTX_H2B	1.76498	0.109151	22.3484	8.02933e-14	2.4974e-12	NA
O08576	P18-CTX_H2B	0.918299	0.263498	22.3484	0.00206246	0.00367656	NA
O08579	P18-CTX_H2B	0.610592	0.215974	22.3484	0.00971827	0.015053	NA
O08582	P18-CTX_H2B	0.0150301	0.164302	22.3484	0.927927	0.935533	NA
O08585	P18-CTX_H2B	3.81483	0.340929	22.3484	1.24583e-10	1.13893e-09	NA
O08586	P18-CTX_H2B	0.779254	0.124934	21.7667	2.94914e-06	9.30113e-06	NA
O08599	P18-CTX_H2B	1.22708	0.148328	21.4489	4.08307e-08	1.91819e-07	NA
O08644	P18-CTX_H2B	1.33321	0.167157	21.8354	6.54937e-08	2.94179e-07	NA
O08663	P18-CTX_H2B	-0.890594	0.140511	21.9128	2.27072e-06	7.34117e-06	NA
O08688	P18-CTX_H2B	-0.189777	0.181343	21.7933	0.306795	0.349919	NA
O08709	P18-CTX_H2B	0.203992	0.213895	21.6371	0.35077	0.394179	NA
O08715	P18-CTX_H2B	0.410945	0.295746	22.3484	0.178364	0.214512	NA
O08739	P18-CTX_H2B	0.680323	0.293351	20.4038	0.0308642	0.043162	NA
O08749	P18-CTX_H2B	-1.1921	0.283997	21.5778	0.000385613	0.000786931	NA
O08756	P18-CTX_H2B	-0.881173	0.193394	22.3484	0.000149742	0.000332951	NA
O08759	P18-CTX_H2B	-0.0963028	0.131037	21.4891	0.470327	0.513601	NA
O08784	P18-CTX_H2B	-1.81905	0.182698	22.3484	1.11336e-09	7.88675e-09	NA
O08788	P18-CTX_H2B	-0.339537	0.120983	21.4927	0.0104272	0.016041	NA
O08795	P18-CTX_H2B	-0.798703	0.185643	22.3484	0.000279784	0.000589638	NA
O08807	P18-CTX_H2B	-1.01342	0.306291	22.3484	0.00314855	0.00540951	NA
O08808	P18-CTX_H2B	1.05485	0.177168	20.4062	7.37965e-06	2.13576e-05	NA
O08810	P18-CTX_H2B	-3.47945	0.17689	21.4652	3.24473e-15	2.43896e-13	NA
O08848	P18-CTX_H2B	0.256979	0.257636	21.3484	0.329719	0.373469	NA
O08914	P18-CTX_H2B	-1.53037	0.212431	10.3484	2.42522e-05	6.3346e-05	NA
O08915	P18-CTX_H2B	1.19861	0.296465	22.3484	0.00052942	0.00105806	NA
O08917	P18-CTX_H2B	-0.21066	0.208219	21.5255	0.322908	0.366439	NA
O08919	P18-CTX_H2B	0.790138	0.134479	21.5004	7.14043e-06	2.08211e-05	NA
O08989	P18-CTX_H2B	-0.958026	0.270361	16.4082	0.00261493	0.00455929	NA
O09012	P18-CTX_H2B	0.116782	0.425484	19.3484	0.786634	0.811826	NA
O09061	P18-CTX_H2B	-1.02548	0.176771	22.3484	7.30843e-06	2.11968e-05	NA
O09111	P18-CTX_H2B	-0.358247	0.146038	21.4241	0.0227982	0.0327626	NA
O09126	P18-CTX_H2B	0.0585491	0.457481	17.3484	0.899636	0.910742	NA
O09131	P18-CTX_H2B	0.544745	0.284582	22.3484	0.0684863	0.0895285	NA
O09167	P18-CTX_H2B	-2.14137	0.240744	22.3484	8.49794e-09	4.77083e-08	NA
O35066	P18-CTX_H2B	0.178091	0.254804	22.3484	0.491804	0.534681	NA
O35075	P18-CTX_H2B	-0.879442	0.302606	10.3484	0.0151487	0.0224247	NA
O35083	P18-CTX_H2B	-0.598186	0.216252	21.5948	0.0113881	0.0173906	NA
O35098	P18-CTX_H2B	0.692241	0.147318	22.3484	0.000105476	0.00024086	NA
O35099	P18-CTX_H2B	2.142	0.287146	22.3484	1.67227e-07	6.92981e-07	NA
O35129	P18-CTX_H2B	-1.01045	0.172054	21.5246	7.15349e-06	2.08368e-05	NA
O35136	P18-CTX_H2B	0.380763	0.239102	21.6265	0.125791	0.156358	NA
O35143	P18-CTX_H2B	-0.0333544	0.422932	21.3484	0.937875	0.944858	NA
O35226	P18-CTX_H2B	-0.953448	0.122905	21.562	1.12351e-07	4.80285e-07	NA
O35239	P18-CTX_H2B	1.1495	0.158879	21.8774	3.1047e-07	1.2229e-06	NA
O35250	P18-CTX_H2B	0.970644	0.157095	22.3484	3.00397e-06	9.45202e-06	NA
O35286	P18-CTX_H2B	-3.68844	0.168912	21.4523	3.87185e-16	5.51433e-14	NA
O35295	P18-CTX_H2B	-1.03001	0.186568	21.4401	1.6484e-05	4.40331e-05	NA
O35326	P18-CTX_H2B	-2.19778	0.248879	22.3484	9.65108e-09	5.30809e-08	NA
O35344	P18-CTX_H2B	0.567908	0.285024	22.3484	0.0586706	0.0778248	NA
O35350	P18-CTX_H2B	1.71451	0.169046	22.3484	7.91598e-10	5.85264e-09	NA
O35381	P18-CTX_H2B	-3.98268	0.233142	21.5033	5.43673e-14	1.86225e-12	NA
O35382	P18-CTX_H2B	0.632245	0.275337	22.3484	0.0313954	0.0437918	NA
O35405	P18-CTX_H2B	-0.656054	0.292734	21.7157	0.0355775	0.0490687	NA
O35449	P18-CTX_H2B	0.11215	0.292773	22.3484	0.705294	0.738593	NA
O35465	P18-CTX_H2B	-0.252119	0.222925	21.3484	0.270617	0.313212	NA
O35495	P18-CTX_H2B	1.61288	0.135545	21.5289	6.18207e-11	6.13394e-10	NA
O35526	P18-CTX_H2B	-0.263633	0.184464	21.4263	0.16737	0.203278	NA
O35551	P18-CTX_H2B	2.14011	0.10848	22.3484	1.24793e-15	1.23189e-13	NA
O35593	P18-CTX_H2B	-1.12219	0.316348	19.3484	0.00210372	0.00374271	NA
O35607	P18-CTX_H2B	2.4277	0.248314	22.3484	1.55552e-09	1.06294e-08	NA
O35609	P18-CTX_H2B	1.38134	0.122078	21.598	1.52316e-10	1.36933e-09	NA
O35621	P18-CTX_H2B	0.0547038	0.142895	21.5397	0.705601	0.738629	NA
O35633	P18-CTX_H2B	-0.518803	0.323975	21.6725	0.123772	0.154274	NA
O35643	P18-CTX_H2B	0.404127	0.282973	18.425	0.169981	0.205711	NA
O35678	P18-CTX_H2B	-0.411049	0.277135	10.3484	0.167822	0.203626	NA
O35681	P18-CTX_H2B	0.696058	0.21444	21.6194	0.00376645	0.00637398	NA
O35685	P18-CTX_H2B	0.159005	0.143235	21.9155	0.278991	0.321892	NA
O35691	P18-CTX_H2B	-1.85983	0.207775	22.3484	7.60093e-09	4.30295e-08	NA
O35841	P18-CTX_H2B	-3.46871	0.209615	10.3484	8.84066e-09	4.94273e-08	NA
O35857	P18-CTX_H2B	-0.662697	0.24387	22.3484	0.0124712	0.0188006	NA
O35864	P18-CTX_H2B	-0.232034	0.252943	21.8762	0.368969	0.412404	NA
O35874	P18-CTX_H2B	-0.495588	0.498794	22.3484	0.331068	0.374527	NA
O35927	P18-CTX_H2B	2.32568	0.126722	22.3484	5.73549e-15	3.52252e-13	NA
O35954	P18-CTX_H2B	1.47545	0.139259	21.8136	4.58759e-10	3.64047e-09	NA
O35963	P18-CTX_H2B	0.644497	0.153506	21.9592	0.000372774	0.000764186	NA
O54774	P18-CTX_H2B	-0.775751	0.328095	21.721	0.0274278	0.0387975	NA
O54781	P18-CTX_H2B	0.645763	0.133815	21.5508	8.47245e-05	0.000196963	NA
O54828	P18-CTX_H2B	3.91835	0.461879	21.3484	2.78809e-08	1.34966e-07	NA
O54829	P18-CTX_H2B	1.24772	0.230248	21.7423	1.99849e-05	5.27601e-05	NA
O54833	P18-CTX_H2B	-0.538406	0.173878	21.5531	0.00535477	0.00874473	NA
O54865	P18-CTX_H2B	0.687323	0.153215	22.3484	0.000178045	0.000390747	NA
O54901	P18-CTX_H2B	-0.91979	0.228699	17.5723	0.000834234	0.00160557	NA
O54916	P18-CTX_H2B	0.880247	0.2301	19.3484	0.00111079	0.00208446	NA
O54946	P18-CTX_H2B	-1.18433	0.239926	10.3484	0.000533505	0.00106543	NA
O54983	P18-CTX_H2B	2.12483	0.291087	22.3484	2.3712e-07	9.53411e-07	NA
O54988	P18-CTX_H2B	0.806134	0.152508	21.5435	2.82432e-05	7.23048e-05	NA
O54991	P18-CTX_H2B	0.314003	0.406996	21.7444	0.448707	0.492976	NA
O55003	P18-CTX_H2B	-1.06575	0.268259	18.3484	0.000863955	0.00166033	NA
O55013	P18-CTX_H2B	-0.806208	0.271308	21.9443	0.00705572	0.0112311	NA
O55017	P18-CTX_H2B	0.0692399	0.203	21.6065	0.736335	0.765766	NA
O55022	P18-CTX_H2B	0.62984	0.221965	22.3484	0.00948938	0.0147153	NA
O55023	P18-CTX_H2B	0.10783	0.159943	21.6897	0.507322	0.548906	NA
O55029	P18-CTX_H2B	-0.0642182	0.201789	22.3484	0.753254	0.78096	NA
O55033	P18-CTX_H2B	0.193571	0.332518	10.3484	0.572939	0.612312	NA
O55042	P18-CTX_H2B	0.680006	0.238515	21.5103	0.00942298	0.0146291	NA
O55091	P18-CTX_H2B	0.925465	0.246846	20.4559	0.00122497	0.00227349	NA
O55100	P18-CTX_H2B	3.27181	0.627628	18.3716	5.50281e-05	0.000134271	NA
O55106	P18-CTX_H2B	1.70764	0.182728	22.3484	3.5265e-09	2.1688e-08	NA
O55125	P18-CTX_H2B	-1.50477	0.199068	21.5125	1.72672e-07	7.14451e-07	NA
O55126	P18-CTX_H2B	-0.543776	0.281022	21.747	0.0661027	0.0866637	NA
O55131	P18-CTX_H2B	1.03955	0.151794	21.4445	8.07895e-07	2.83917e-06	NA
O55142	P18-CTX_H2B	-1.33971	0.342289	22.3484	0.000726511	0.00141601	NA
O55143	P18-CTX_H2B	-0.131386	0.13954	21.4273	0.356908	0.399749	NA
O55201	P18-CTX_H2B	-2.19747	0.15482	21.4172	2.27819e-12	3.87722e-11	NA
O55234	P18-CTX_H2B	-1.15182	0.137201	21.9137	2.70891e-08	1.31944e-07	NA
O70133	P18-CTX_H2B	-3.91726	0.136817	21.3979	1.50391e-18	2.03479e-15	NA
O70152	P18-CTX_H2B	-0.650494	0.293929	19.2611	0.0391518	0.0536973	NA
O70161	P18-CTX_H2B	1.67972	0.133974	21.4272	2.45374e-11	2.75511e-10	NA
O70166	P18-CTX_H2B	2.54519	0.244867	21.7666	6.67219e-10	5.04328e-09	NA
O70172	P18-CTX_H2B	-0.0239829	0.148114	21.5116	0.872878	0.889311	NA
O70194	P18-CTX_H2B	-1.18216	0.148142	21.8898	6.37974e-08	2.87247e-07	NA
O70228	P18-CTX_H2B	0.0215957	0.164204	22.3484	0.896543	0.908291	NA
O70250	P18-CTX_H2B	-0.297495	0.212454	19.5268	0.177119	0.213394	NA
O70252	P18-CTX_H2B	0.264269	0.19157	21.6801	0.181807	0.218168	NA
O70305	P18-CTX_H2B	-1.36838	0.14203	21.5143	2.9356e-09	1.86473e-08	NA
O70310	P18-CTX_H2B	-1.26295	0.179202	21.6244	4.99329e-07	1.84841e-06	NA
O70311	P18-CTX_H2B	-0.12048	0.177016	21.9796	0.503223	0.545125	NA
O70318	P18-CTX_H2B	0.425469	0.181732	21.4976	0.0289221	0.0407196	NA
O70325	P18-CTX_H2B	0.423218	0.191832	21.7628	0.0382351	0.0524666	NA
O70433	P18-CTX_H2B	0.296631	0.234327	21.6878	0.218983	0.257975	NA
O70435	P18-CTX_H2B	-1.05539	0.15404	22.3484	6.42132e-07	2.31681e-06	NA
O70439	P18-CTX_H2B	0.530859	0.117879	21.8169	0.000179582	0.000393799	NA
O70443	P18-CTX_H2B	0.366003	0.263894	21.6852	0.179555	0.215658	NA
O70481	P18-CTX_H2B	0.80571	0.103289	21.9278	9.15787e-08	4.01273e-07	NA
O70492	P18-CTX_H2B	-0.70918	0.234593	22.3484	0.00618041	0.00996641	NA
O70493	P18-CTX_H2B	-0.553369	0.226583	22.3484	0.0229509	0.0329295	NA
O70503	P18-CTX_H2B	-0.254319	0.16559	21.6239	0.139082	0.171461	NA
O70566	P18-CTX_H2B	0.497218	0.300581	14.4343	0.119664	0.150121	NA
O70589	P18-CTX_H2B	3.17408	0.208202	22.3484	2.69632e-13	7.36994e-12	NA
O70591	P18-CTX_H2B	-0.266186	0.220361	22.3484	0.239692	0.280176	NA
O88196	P18-CTX_H2B	-0.254654	0.16686	22.3484	0.141	0.17343	NA
O88291	P18-CTX_H2B	-4.08811	0.218544	20.4454	2.46634e-14	1.02676e-12	NA
O88342	P18-CTX_H2B	-0.000567812	0.129965	21.4513	0.996554	0.997292	NA
O88343	P18-CTX_H2B	-0.919622	0.210687	19.0331	0.00033211	0.000686022	NA
O88384	P18-CTX_H2B	-0.0964376	0.233987	22.0154	0.684215	0.719863	NA
O88444	P18-CTX_H2B	1.81807	0.180568	22.3484	9.05899e-10	6.55444e-09	NA
O88447	P18-CTX_H2B	2.28204	0.196646	22.3484	6.18834e-11	6.13394e-10	NA
O88448	P18-CTX_H2B	2.46814	0.141953	21.715	3.14467e-14	1.23326e-12	NA
O88455	P18-CTX_H2B	-0.687288	0.196819	22.3484	0.00202821	0.00362506	NA
O88485	P18-CTX_H2B	0.20197	0.126595	21.4477	0.125255	0.155834	NA
O88487	P18-CTX_H2B	0.614206	0.176263	22.3484	0.00206464	0.00367801	NA
O88532	P18-CTX_H2B	-3.46281	0.146928	21.3974	8.56027e-17	2.31641e-14	NA
O88543	P18-CTX_H2B	-0.177593	0.189577	21.5634	0.359245	0.402053	NA
O88544	P18-CTX_H2B	0.282567	0.262356	21.835	0.293221	0.336211	NA
O88569	P18-CTX_H2B	-3.922	0.170643	21.4449	1.3594e-16	3.06545e-14	NA
O88597	P18-CTX_H2B	-0.77754	0.361514	11.3484	0.0538333	0.0719372	NA
O88643	P18-CTX_H2B	1.14505	0.20445	21.6691	1.3164e-05	3.58728e-05	NA
O88685	P18-CTX_H2B	-0.79068	0.145512	21.6645	1.95318e-05	5.17152e-05	NA
O88696	P18-CTX_H2B	-1.2955	0.218734	21.7608	6.10006e-06	1.80797e-05	NA
O88703	P18-CTX_H2B	1.11133	0.436177	16.5724	0.0210857	0.0304634	NA
O88704	P18-CTX_H2B	0.249572	0.190673	21.4575	0.204414	0.24282	NA
O88705	P18-CTX_H2B	0.329339	0.255133	19.3484	0.211966	0.250628	NA
O88712	P18-CTX_H2B	0.576285	0.230273	21.5647	0.0204246	0.0295556	NA
O88737	P18-CTX_H2B	2.55547	0.361567	21.8075	4.55357e-07	1.70193e-06	NA
O88738	P18-CTX_H2B	1.12878	0.164368	22.3484	6.19342e-07	2.24958e-06	NA
O88741	P18-CTX_H2B	-0.717617	0.187787	21.507	0.000961574	0.00182598	NA
O88809	P18-CTX_H2B	1.41766	0.409758	21.7272	0.00225918	0.00399304	NA
O88811	P18-CTX_H2B	1.39263	0.213081	22.3484	1.31543e-06	4.45502e-06	NA
O88834	P18-CTX_H2B	2.60467	0.290148	22.3484	7.22291e-09	4.11373e-08	NA
O88844	P18-CTX_H2B	0.628338	0.163506	22.3484	0.000864525	0.00166033	NA
O88845	P18-CTX_H2B	1.18436	0.165982	21.3484	4.44786e-07	1.66702e-06	NA
O88910	P18-CTX_H2B	0.81689	0.243203	22.3484	0.00279266	0.00484108	NA
O88935	P18-CTX_H2B	0.584343	0.157666	21.4036	0.0012763	0.0023623	NA
O88951	P18-CTX_H2B	-0.540093	0.612392	10.3484	0.397832	0.442471	NA
O88983	P18-CTX_H2B	0.0274482	0.189557	22.3484	0.886165	0.900136	NA
O88998	P18-CTX_H2B	-1.04177	0.254025	18.5881	0.000632714	0.00124337	NA
O89026	P18-CTX_H2B	3.39138	0.193813	21.4706	3.45385e-14	1.33516e-12	NA
O89032	P18-CTX_H2B	1.37149	0.203667	21.7999	9.53273e-07	3.29867e-06	NA
O89053	P18-CTX_H2B	-0.371304	0.217122	21.5346	0.101616	0.128914	NA
O89084	P18-CTX_H2B	3.43222	0.226689	22.3484	3.10365e-13	7.92308e-12	NA
O89086	P18-CTX_H2B	-3.05161	0.367869	22.3484	2.8532e-08	1.37625e-07	NA
O89112	P18-CTX_H2B	0.780367	0.18714	21.5475	0.000413315	0.000840925	NA
O89116	P18-CTX_H2B	-0.398441	0.187691	21.6122	0.0454698	0.0618609	NA
P00405	P18-CTX_H2B	-0.508395	0.217977	21.5048	0.0294665	0.0414	NA
P00493	P18-CTX_H2B	0.154032	0.238215	21.6607	0.524676	0.564522	NA
P00520	P18-CTX_H2B	0.837953	0.240109	20.3484	0.00226328	0.00399768	NA
P00920	P18-CTX_H2B	-0.778448	0.248477	20.632	0.00510209	0.00836743	NA
P01831	P18-CTX_H2B	-1.357	0.265901	21.4274	4.42925e-05	0.000109758	NA
P01942	P18-CTX_H2B	-1.10623	0.207336	21.6785	2.46103e-05	6.40957e-05	NA
P02088	P18-CTX_H2B	-1.59024	0.267365	21.8126	5.69918e-06	1.69472e-05	NA
P03899	P18-CTX_H2B	-0.20024	0.296794	21.7538	0.506989	0.548906	NA
P03911	P18-CTX_H2B	0.728851	0.233874	18.3484	0.00586014	0.0094785	NA
P03995	P18-CTX_H2B	-0.79803	0.520101	19.3484	0.141128	0.173508	NA
P04104	P18-CTX_H2B	-0.0225669	0.787387	22.3484	0.97739	0.980651	NA
P04370	P18-CTX_H2B	0.380515	0.46749	19.5791	0.425462	0.470479	NA
P04627	P18-CTX_H2B	-0.0412692	0.159711	21.6924	0.798534	0.821922	NA
P04925	P18-CTX_H2B	-0.731282	0.170553	21.4832	0.0003126	0.000650417	NA
P05063	P18-CTX_H2B	-0.93693	0.238638	21.578	0.000743491	0.00144636	NA
P05064	P18-CTX_H2B	0.240234	0.179411	21.4551	0.194581	0.232261	NA
P05132	P18-CTX_H2B	-0.216326	0.14121	21.5065	0.140114	0.172654	NA
P05201	P18-CTX_H2B	-3.10155	0.360587	10.3484	4.93524e-06	1.48386e-05	NA
P05480	P18-CTX_H2B	0.627725	0.144716	22.3484	0.000256514	0.000542287	NA
P05532	P18-CTX_H2B	1.75237	0.36509	17.4387	0.000155987	0.000345135	NA
P06151	P18-CTX_H2B	0.102565	0.278465	21.6798	0.716205	0.747705	NA
P06537	P18-CTX_H2B	-1.76663	0.198279	21.4565	1.16936e-08	6.27837e-08	NA
P06745	P18-CTX_H2B	-0.922642	0.295701	21.5551	0.00506704	0.00831499	NA
P06801	P18-CTX_H2B	-1.20979	0.203889	21.5366	6.20262e-06	1.83235e-05	NA
P06837	P18-CTX_H2B	0.793556	0.171996	22.3484	0.000130015	0.000292211	NA
P07356	P18-CTX_H2B	-1.0735	0.327352	22.3484	0.00337664	0.00575753	NA
P07724	P18-CTX_H2B	-0.817729	0.285027	11.3484	0.0148412	0.0220298	NA
P07901	P18-CTX_H2B	0.319215	0.12176	21.523	0.0157464	0.0232713	NA
P08003	P18-CTX_H2B	-1.05985	0.248956	22.3484	0.00031271	0.000650417	NA
P08113	P18-CTX_H2B	-1.00376	0.256163	21.6898	0.000751561	0.00145891	NA
P08228	P18-CTX_H2B	0.495134	0.193924	22.3484	0.0179966	0.0262747	NA
P08249	P18-CTX_H2B	-1.17324	0.236765	21.5906	6.17723e-05	0.000148715	NA
P08414	P18-CTX_H2B	0.79752	0.264724	21.8994	0.00642542	0.0103127	NA
P08551	P18-CTX_H2B	4.16706	0.429261	22.3484	1.77106e-09	1.18042e-08	NA
P08553	P18-CTX_H2B	4.50916	0.361372	22.3484	1.50626e-11	1.83601e-10	NA
P08556	P18-CTX_H2B	0.655709	0.212616	22.3484	0.00535864	0.00874577	NA
P08752	P18-CTX_H2B	1.0084	0.109076	22.3484	4.27976e-09	2.58505e-08	NA
P09103	P18-CTX_H2B	-0.790908	0.149495	21.7218	2.72134e-05	6.99994e-05	NA
P09405	P18-CTX_H2B	-1.88927	0.181202	21.8343	6.09742e-10	4.66091e-09	NA
P09411	P18-CTX_H2B	-0.705884	0.202319	21.5442	0.0021269	0.00377403	NA
P09528	P18-CTX_H2B	0.227721	0.212897	21.7096	0.296535	0.339435	NA
P09671	P18-CTX_H2B	-0.893422	0.501344	21.8774	0.0886269	0.113446	NA
P0C027	P18-CTX_H2B	-0.0397689	0.222641	22.3484	0.859843	0.87669	NA
P0C0A3	P18-CTX_H2B	-1.1175	0.160657	21.5562	6.20922e-07	2.2523e-06	NA
P0C7L0	P18-CTX_H2B	0.878273	0.26132	22.3484	0.00277905	0.004821	NA
P0DP27	P18-CTX_H2B	1.01932	0.209583	22.3484	7.04387e-05	0.000167346	NA
P10126	P18-CTX_H2B	-0.0317666	0.234294	22.3484	0.893364	0.906428	NA
P10630	P18-CTX_H2B	-0.573486	0.180415	21.8687	0.00436652	0.00725786	NA
P10637	P18-CTX_H2B	3.2031	0.26699	22.3484	3.24903e-11	3.50274e-10	NA
P10639	P18-CTX_H2B	1.94164	0.228382	22.3484	1.87038e-08	9.42506e-08	NA
P10649	P18-CTX_H2B	-0.976096	0.18409	21.4822	2.74089e-05	7.03687e-05	NA
P10711	P18-CTX_H2B	-2.09649	0.260075	22.3484	4.63986e-08	2.16101e-07	NA
P10852	P18-CTX_H2B	-1.18707	0.210441	21.5305	1.22589e-05	3.37119e-05	NA
P10922	P18-CTX_H2B	-0.840863	0.18841	22.3484	0.000188434	0.000411211	NA
P11352	P18-CTX_H2B	0.490516	0.191124	22.3484	0.017477	0.0256052	NA
P11438	P18-CTX_H2B	0.217467	0.223395	10.3484	0.352528	0.39599	NA
P11499	P18-CTX_H2B	0.336339	0.119819	21.6704	0.0103622	0.0159599	NA
P11798	P18-CTX_H2B	1.09337	0.416909	21.5197	0.0157162	0.0232394	NA
P11881	P18-CTX_H2B	0.982227	0.17635	21.4501	1.4674e-05	3.95496e-05	NA
P11983	P18-CTX_H2B	-0.217278	0.10431	21.6275	0.049292	0.0664927	NA
P12023	P18-CTX_H2B	0.862564	0.388582	21.3484	0.037388	0.0513564	NA
P12367	P18-CTX_H2B	0.673035	0.153763	21.756	0.000245568	0.000521181	NA
P12382	P18-CTX_H2B	0.974772	0.150715	21.4723	1.86526e-06	6.0812e-06	NA
P12658	P18-CTX_H2B	0.556818	0.366393	22.3484	0.142601	0.174843	NA
P12815	P18-CTX_H2B	-0.0845607	0.2229	10.3484	0.712084	0.744839	NA
P12849	P18-CTX_H2B	-1.04743	0.213086	21.5003	6.87225e-05	0.000163989	NA
P12960	P18-CTX_H2B	-0.991091	0.164414	21.4554	5.07008e-06	1.51934e-05	NA
P12970	P18-CTX_H2B	-1.70524	0.305293	22.3484	1.22249e-05	3.36869e-05	NA
P13020	P18-CTX_H2B	0.741518	0.347188	22.3484	0.0438934	0.0599271	NA
P13595	P18-CTX_H2B	-0.706112	0.156557	21.6049	0.000180386	0.000395243	NA
P14094	P18-CTX_H2B	-1.20114	0.2306	21.4268	3.44854e-05	8.705e-05	NA
P14115	P18-CTX_H2B	-2.32709	0.283237	22.3484	3.36087e-08	1.60115e-07	NA
P14131	P18-CTX_H2B	-1.62207	0.192845	22.3484	2.24916e-08	1.11674e-07	NA
P14148	P18-CTX_H2B	-1.41146	0.205026	21.9088	6.64539e-07	2.38494e-06	NA
P14152	P18-CTX_H2B	-0.71472	0.193497	21.4725	0.00130958	0.00241892	NA
P14206	P18-CTX_H2B	-1.62509	0.179953	22.3484	6.50042e-09	3.75857e-08	NA
P14211	P18-CTX_H2B	-0.880096	0.299754	22.3484	0.00756436	0.0119773	NA
P14231	P18-CTX_H2B	-1.01677	0.308105	21.5851	0.00332075	0.00567295	NA
P14685	P18-CTX_H2B	-0.862384	0.143216	21.5464	5.05556e-06	1.51667e-05	NA
P14733	P18-CTX_H2B	-2.83883	0.18695	22.3484	2.92382e-13	7.70623e-12	NA
P14824	P18-CTX_H2B	0.994973	0.143225	21.4804	6.45588e-07	2.32309e-06	NA
P14869	P18-CTX_H2B	-1.14633	0.247651	22.3484	0.000125316	0.000282587	NA
P14873	P18-CTX_H2B	1.6586	0.241715	22.3484	6.27251e-07	2.27221e-06	NA
P15105	P18-CTX_H2B	-1.52535	0.257109	21.4391	6.33039e-06	1.86196e-05	NA
P15116	P18-CTX_H2B	-0.417467	0.130548	21.562	0.00422632	0.00704647	NA
P15209	P18-CTX_H2B	-0.735876	0.148614	21.5191	6.2886e-05	0.000151128	NA
P15307	P18-CTX_H2B	1.3359	0.492718	19.8143	0.0135139	0.0202484	NA
P15331	P18-CTX_H2B	Inf	NA	NA	NA	NA	oneConditionMissing
P15508	P18-CTX_H2B	0.738329	0.246621	19.4606	0.0073268	0.0116147	NA
P15532	P18-CTX_H2B	-0.300739	0.123228	21.4986	0.0233929	0.0334926	NA
P15864	P18-CTX_H2B	-0.203443	0.286227	22.3484	0.484575	0.528095	NA
P16054	P18-CTX_H2B	0.878443	0.124135	21.5271	4.81226e-07	1.78628e-06	NA
P16125	P18-CTX_H2B	-0.287472	0.259309	21.5504	0.279818	0.322619	NA
P16283	P18-CTX_H2B	0.541371	0.219303	21.586	0.02198	0.0316708	NA
P16330	P18-CTX_H2B	1.05671	0.55803	21.5807	0.0717567	0.0935326	NA
P16460	P18-CTX_H2B	1.00778	0.424589	21.8591	0.0268369	0.0380425	NA
P16546	P18-CTX_H2B	1.64579	0.118881	21.6079	3.22355e-12	5.22331e-11	NA
P16858	P18-CTX_H2B	-0.00656167	0.161653	21.48	0.967997	0.972309	NA
P17156	P18-CTX_H2B	1.34649	0.274789	21.8704	6.81757e-05	0.000162827	NA
P17182	P18-CTX_H2B	-0.711179	0.295758	21.6682	0.0251915	0.0358591	NA
P17183	P18-CTX_H2B	-0.0706017	0.253717	20.3484	0.783614	0.809027	NA
P17426	P18-CTX_H2B	0.113321	0.135864	21.3925	0.413457	0.457967	NA
P17427	P18-CTX_H2B	0.38028	0.162135	21.4514	0.0286838	0.0404051	NA
P17710	P18-CTX_H2B	-0.518811	0.113153	21.3667	0.000154347	0.000342066	NA
P17742	P18-CTX_H2B	-0.723275	0.184115	22.3484	0.000701318	0.00137023	NA
P17751	P18-CTX_H2B	0.574745	0.193864	21.5318	0.0072645	0.0115295	NA
P17809	P18-CTX_H2B	-0.378491	0.228399	20.4536	0.112749	0.141973	NA
P18242	P18-CTX_H2B	-0.790658	0.238717	21.6945	0.0032122	0.0055014	NA
P18572	P18-CTX_H2B	-0.678684	0.142376	21.422	9.91062e-05	0.000227465	NA
P18760	P18-CTX_H2B	0.318344	0.199786	22.3484	0.125111	0.155727	NA
P18872	P18-CTX_H2B	0.896928	0.119891	21.4781	2.05512e-07	8.40053e-07	NA
P19096	P18-CTX_H2B	1.3349	0.135782	21.8534	1.75727e-09	1.1756e-08	NA
P19157	P18-CTX_H2B	1.03773	0.144101	21.9018	3.3182e-07	1.29195e-06	NA
P19246	P18-CTX_H2B	4.84906	0.373406	22.3484	6.84768e-12	9.3585e-11	NA
P19536	P18-CTX_H2B	0.406748	0.3416	22.3484	0.24626	0.286614	NA
P19783	P18-CTX_H2B	-0.422744	0.179803	21.5275	0.0283036	0.0399111	NA
P20029	P18-CTX_H2B	-1.23433	0.180322	21.6928	7.64676e-07	2.6978e-06	NA
P20108	P18-CTX_H2B	-0.28637	0.115778	21.4181	0.0218212	0.0314587	NA
P20152	P18-CTX_H2B	0.164946	0.234756	22.3484	0.489541	0.532435	NA
P20357	P18-CTX_H2B	-2.86754	0.225679	21.4901	1.82755e-11	2.14084e-10	NA
P20444	P18-CTX_H2B	0.839929	0.172139	21.6763	7.33688e-05	0.000173394	NA
P20917	P18-CTX_H2B	1.67958	0.369428	19.5219	0.000207422	0.000445463	NA
P21107	P18-CTX_H2B	2.18589	0.233085	22.3484	3.31084e-09	2.06432e-08	NA
P21126	P18-CTX_H2B	-0.8811	0.173137	21.8397	4.33816e-05	0.000107797	NA
P21278	P18-CTX_H2B	-0.181376	0.136567	21.7994	0.19788	0.235679	NA
P21279	P18-CTX_H2B	0.220705	0.150752	22.3484	0.157112	0.191507	NA
P21460	P18-CTX_H2B	-0.331689	0.158954	22.3484	0.0485288	0.0656923	NA
P21619	P18-CTX_H2B	-3.15917	0.181507	21.4796	3.81363e-14	1.39455e-12	NA
P21836	P18-CTX_H2B	0.239606	0.320919	16.5832	0.465745	0.509214	NA
P22437	P18-CTX_H2B	-0.970118	0.333354	21.7451	0.00817634	0.0128113	NA
P22682	P18-CTX_H2B	2.44417	0.338391	21.2514	3.79068e-07	1.45292e-06	NA
P22892	P18-CTX_H2B	0.63513	0.318147	22.3484	0.0582214	0.0772668	NA
P23116	P18-CTX_H2B	-1.30904	0.173595	21.9338	1.58319e-07	6.61127e-07	NA
P23242	P18-CTX_H2B	-0.351284	0.268391	10.3484	0.218904	0.257975	NA
P23506	P18-CTX_H2B	-0.29617	0.259625	21.6345	0.26644	0.308774	NA
P23591	P18-CTX_H2B	-0.56966	0.239752	21.3484	0.0269268	0.0381486	NA
P23818	P18-CTX_H2B	-0.268719	0.163587	21.4595	0.115026	0.144638	NA
P23819	P18-CTX_H2B	-0.366032	0.192868	21.499	0.0712273	0.0928873	NA
P24270	P18-CTX_H2B	-0.626744	0.164863	22.3484	0.000956335	0.00181858	NA
P24288	P18-CTX_H2B	1.19237	0.138206	22.3484	1.44984e-08	7.5206e-08	NA
P24369	P18-CTX_H2B	-0.308369	0.200447	22.3484	0.137989	0.170329	NA
P24527	P18-CTX_H2B	-0.231938	0.166587	21.4994	0.178069	0.214312	NA
P24529	P18-CTX_H2B	4.53829	0.256675	20.6711	5.91424e-14	1.9517e-12	NA
P24547	P18-CTX_H2B	1.59367	0.26899	22.3484	5.45523e-06	1.63114e-05	NA
P24549	P18-CTX_H2B	2.52041	0.413886	22.3484	3.6997e-06	1.14168e-05	NA
P24668	P18-CTX_H2B	-0.576493	0.305058	21.7269	0.0722042	0.09398	NA
P25444	P18-CTX_H2B	-1.16635	0.161048	22.3484	2.68965e-07	1.06719e-06	NA
P26039	P18-CTX_H2B	-0.325328	0.347562	22.3484	0.359263	0.402053	NA
P26040	P18-CTX_H2B	-1.27797	0.211239	22.3484	4.06146e-06	1.24184e-05	NA
P26043	P18-CTX_H2B	-0.326566	0.258976	22.3484	0.220318	0.259435	NA
P26369	P18-CTX_H2B	-2.49855	0.289989	10.3484	4.85896e-06	1.46418e-05	NA
P26443	P18-CTX_H2B	-1.78722	0.199193	21.4429	1.04325e-08	5.71463e-08	NA
P26450	P18-CTX_H2B	2.35453	0.190171	22.0161	2.15404e-11	2.45942e-10	NA
P26638	P18-CTX_H2B	-0.60073	0.134768	21.5599	0.000205848	0.000442785	NA
P26645	P18-CTX_H2B	-0.944463	0.211587	22.3484	0.000188085	0.000410781	NA
P27546	P18-CTX_H2B	1.02146	0.265426	22.3484	0.000853014	0.00164055	NA
P27601	P18-CTX_H2B	0.550565	0.189448	21.8399	0.00822822	0.0128703	NA
P27612	P18-CTX_H2B	1.09254	0.112208	21.7316	2.20765e-09	1.43949e-08	NA
P27659	P18-CTX_H2B	-0.732468	0.175186	22.3484	0.000377066	0.000771233	NA
P27671	P18-CTX_H2B	0.657173	0.391866	21.871	0.107772	0.135959	NA
P27773	P18-CTX_H2B	-0.899113	0.18961	21.7436	0.000101456	0.000232661	NA
P28028	P18-CTX_H2B	1.45409	0.274547	21.7937	2.65626e-05	6.86516e-05	NA
P28184	P18-CTX_H2B	2.70857	0.564948	22.3484	8.3455e-05	0.000194513	NA
P28271	P18-CTX_H2B	0.130183	0.114121	22.3484	0.266052	0.308456	NA
P28352	P18-CTX_H2B	-0.855825	0.148047	22.3484	7.67149e-06	2.20841e-05	NA
P28474	P18-CTX_H2B	0.0229157	0.175682	22.3484	0.897387	0.908806	NA
P28652	P18-CTX_H2B	1.43315	0.133968	21.5416	4.42082e-10	3.51845e-09	NA
P28656	P18-CTX_H2B	0.699885	0.161196	22.3484	0.000253883	0.000537986	NA
P28660	P18-CTX_H2B	0.891163	0.154073	21.5262	8.78721e-06	2.50825e-05	NA
P28661	P18-CTX_H2B	0.669002	0.226505	20.424	0.00773532	0.0122122	NA
P28663	P18-CTX_H2B	0.388847	0.189738	21.5472	0.0527932	0.0707921	NA
P28667	P18-CTX_H2B	-0.660834	0.196145	22.3484	0.00272501	0.00473899	NA
P28738	P18-CTX_H2B	2.06956	0.124057	21.8029	6.73881e-14	2.12037e-12	NA
P28740	P18-CTX_H2B	1.1124	0.11319	22.3484	1.4143e-09	9.81308e-09	NA
P28741	P18-CTX_H2B	-0.284948	0.133558	22.3484	0.0440983	0.0601765	NA
P28867	P18-CTX_H2B	0.0402945	0.350026	22.3484	0.909379	0.918887	NA
P29341	P18-CTX_H2B	0.1193	0.126479	22.3484	0.355646	0.39883	NA
P30275	P18-CTX_H2B	-1.11003	0.416215	21.5659	0.0142281	0.0212245	NA
P30416	P18-CTX_H2B	0.515817	0.1461	22.3484	0.00184781	0.00332237	NA
P30999	P18-CTX_H2B	2.92119	0.19452	22.3484	3.66783e-13	8.94158e-12	NA
P31230	P18-CTX_H2B	-1.08129	0.176638	21.8373	3.7935e-06	1.16916e-05	NA
P31324	P18-CTX_H2B	1.54844	0.14089	22.3484	1.75365e-10	1.55078e-09	NA
P31648	P18-CTX_H2B	-1.19198	0.152353	21.4087	1.02875e-07	4.44694e-07	NA
P31650	P18-CTX_H2B	-1.20118	0.214731	21.5868	1.35575e-05	3.67602e-05	NA
P31938	P18-CTX_H2B	1.21769	0.270343	20.4933	0.000205313	0.000441987	NA
P32020	P18-CTX_H2B	-0.531865	0.169279	22.3484	0.00467605	0.00771078	NA
P32037	P18-CTX_H2B	-0.049006	0.419687	21.3484	0.908135	0.918316	NA
P32067	P18-CTX_H2B	-2.19583	0.18741	21.8105	7.01061e-11	6.80722e-10	NA
P32883	P18-CTX_H2B	-0.613071	0.236611	22.3484	0.0165507	0.0243535	NA
P32921	P18-CTX_H2B	0.677617	0.0970515	21.6937	5.6584e-07	2.07475e-06	NA
P33173	P18-CTX_H2B	2.10048	0.111663	21.8685	5.42895e-15	3.4978e-13	NA
P33175	P18-CTX_H2B	2.71643	0.143443	21.6617	5.78967e-15	3.52252e-13	NA
P34022	P18-CTX_H2B	0.378291	0.149813	22.3484	0.0191486	0.0278133	NA
P34152	P18-CTX_H2B	1.40528	0.15174	21.7634	5.28221e-09	3.11409e-08	NA
P34884	P18-CTX_H2B	-0.0566668	0.170389	22.3484	0.742556	0.771346	NA
P34914	P18-CTX_H2B	-0.272368	0.209102	19.4281	0.207954	0.246268	NA
P35123	P18-CTX_H2B	1.26047	0.127732	22.3484	1.31185e-09	9.19655e-09	NA
P35235	P18-CTX_H2B	1.34627	0.0957168	21.8072	2.04634e-12	3.50468e-11	NA
P35278	P18-CTX_H2B	0.080589	0.213023	22.3484	0.708768	0.741658	NA
P35279	P18-CTX_H2B	0.222332	0.145426	21.6673	0.140775	0.173232	NA
P35282	P18-CTX_H2B	0.17534	0.108602	21.4585	0.121023	0.151545	NA
P35283	P18-CTX_H2B	-0.385944	0.166706	21.6563	0.0304847	0.0426976	NA
P35288	P18-CTX_H2B	-0.612693	0.138544	21.5782	0.000223736	0.000477468	NA
P35293	P18-CTX_H2B	-0.706135	0.164599	21.643	0.000306492	0.000640933	NA
P35438	P18-CTX_H2B	-1.43529	0.286568	10.3484	0.000478148	0.000962699	NA
P35486	P18-CTX_H2B	-1.16039	0.211348	21.4781	1.75962e-05	4.69116e-05	NA
P35550	P18-CTX_H2B	-1.08963	0.16	22.3484	7.04654e-07	2.50894e-06	NA
P35564	P18-CTX_H2B	-0.651775	0.198558	21.7544	0.00343551	0.00585053	NA
P35585	P18-CTX_H2B	0.139939	0.17601	21.6473	0.435208	0.479704	NA
P35700	P18-CTX_H2B	0.287901	0.104126	21.433	0.0114687	0.0174743	NA
P35762	P18-CTX_H2B	0.49125	0.160454	21.4491	0.00582696	0.00943048	NA
P35802	P18-CTX_H2B	0.0459262	0.215477	21.5591	0.833223	0.853407	NA
P35803	P18-CTX_H2B	0.535151	0.192753	21.581	0.0111332	0.0170494	NA
P35831	P18-CTX_H2B	1.70745	0.174377	21.8531	1.8894e-09	1.25311e-08	NA
P35922	P18-CTX_H2B	-1.62375	0.204083	21.9013	6.6742e-08	2.99013e-07	NA
P35979	P18-CTX_H2B	-1.07849	0.13767	21.7775	8.95569e-08	3.94692e-07	NA
P35980	P18-CTX_H2B	-1.90097	0.21283	22.3484	7.89637e-09	4.45158e-08	NA
P36536	P18-CTX_H2B	-0.509701	0.421674	22.3484	0.239391	0.279945	NA
P36916	P18-CTX_H2B	0.198577	0.134691	21.4923	0.154896	0.188976	NA
P36993	P18-CTX_H2B	0.976097	0.168151	22.3484	7.24476e-06	2.10573e-05	NA
P37040	P18-CTX_H2B	1.29135	0.178211	22.3484	2.6664e-07	1.06107e-06	NA
P38647	P18-CTX_H2B	-0.874786	0.194881	21.881	0.000184911	0.000404496	NA
P39053	P18-CTX_H2B	1.10292	0.275857	21.5197	0.000627468	0.00123486	NA
P39054	P18-CTX_H2B	0.74901	0.229347	20.4087	0.00379361	0.00640794	NA
P39447	P18-CTX_H2B	-0.0259015	0.129566	21.5247	0.843427	0.862227	NA
P39688	P18-CTX_H2B	2.22069	0.219965	22.3484	8.62068e-10	6.30475e-09	NA
P40124	P18-CTX_H2B	0.792314	0.116251	21.4719	8.62378e-07	3.00721e-06	NA
P40142	P18-CTX_H2B	0.147472	0.155744	22.3484	0.353821	0.397113	NA
P40336	P18-CTX_H2B	-0.00384259	0.294117	21.7421	0.989695	0.990794	NA
P41105	P18-CTX_H2B	-1.73968	0.253194	22.3484	6.14432e-07	2.23475e-06	NA
P41216	P18-CTX_H2B	-1.93464	0.347877	21.6492	1.44892e-05	3.91294e-05	NA
P41241	P18-CTX_H2B	1.67081	0.347255	22.3484	8.00252e-05	0.000187944	NA
P41242	P18-CTX_H2B	0.24178	0.160732	21.9341	0.146783	0.179564	NA
P42125	P18-CTX_H2B	-1.04467	0.33313	21.3484	0.00492373	0.00810438	NA
P42208	P18-CTX_H2B	0.104173	0.198715	22.3484	0.605277	0.64509	NA
P42669	P18-CTX_H2B	-1.43897	0.19985	21.4155	3.80054e-07	1.45464e-06	NA
P42859	P18-CTX_H2B	1.33147	0.11199	21.4756	6.48479e-11	6.38103e-10	NA
P42932	P18-CTX_H2B	0.498963	0.0956475	21.8286	3.19767e-05	8.10196e-05	NA
P43006	P18-CTX_H2B	-0.00557128	0.337408	21.473	0.986978	0.98844	NA
P43274	P18-CTX_H2B	-1.11913	0.225946	22.3484	5.65853e-05	0.000137698	NA
P43275	P18-CTX_H2B	-0.701016	0.167009	22.3484	0.000362176	0.000743588	NA
P43276	P18-CTX_H2B	-0.376392	0.221024	22.3484	0.102447	0.129908	NA
P43277	P18-CTX_H2B	0.665436	0.233819	22.3484	0.00930906	0.0144689	NA
P45376	P18-CTX_H2B	0.148449	0.182863	21.9465	0.425622	0.470479	NA
P45591	P18-CTX_H2B	-0.930876	0.177385	22.3484	2.76082e-05	7.0813e-05	NA
P45952	P18-CTX_H2B	-1.26099	0.450644	10.3484	0.0182837	0.0266428	NA
P46061	P18-CTX_H2B	-0.282065	0.256279	11.3484	0.293863	0.336803	NA
P46096	P18-CTX_H2B	-0.00122576	0.346044	21.5274	0.997206	0.997575	NA
P46097	P18-CTX_H2B	-0.740782	0.239624	10.3484	0.0109817	0.0168461	NA
P46460	P18-CTX_H2B	0.511938	0.192734	21.4334	0.0146186	0.0217351	NA
P46471	P18-CTX_H2B	-0.692783	0.10369	21.4133	1.17575e-06	4.01207e-06	NA
P46638	P18-CTX_H2B	-0.743649	0.14465	21.7558	3.87187e-05	9.69221e-05	NA
P46660	P18-CTX_H2B	5.06693	0.514942	22.3484	1.3828e-09	9.66887e-09	NA
P46664	P18-CTX_H2B	1.82733	0.179002	22.3484	7.01725e-10	5.26002e-09	NA
P46735	P18-CTX_H2B	0.227269	0.224019	22.3484	0.3212	0.364889	NA
P46935	P18-CTX_H2B	1.53684	0.145976	21.5917	5.76751e-10	4.47188e-09	NA
P46978	P18-CTX_H2B	-0.554211	0.149271	21.7394	0.00123096	0.00228305	NA
P47708	P18-CTX_H2B	1.29564	0.373305	21.632	0.0022114	0.0039137	NA
P47738	P18-CTX_H2B	-0.82959	0.180949	21.6936	0.000149287	0.000332213	NA
P47740	P18-CTX_H2B	0.139075	0.196865	21.6648	0.487439	0.530788	NA
P47743	P18-CTX_H2B	0.0414682	0.155953	21.5749	0.792839	0.816682	NA
P47746	P18-CTX_H2B	1.19842	0.214646	22.3484	1.22936e-05	3.37731e-05	NA
P47753	P18-CTX_H2B	0.376364	0.157456	22.3484	0.0256807	0.0365362	NA
P47754	P18-CTX_H2B	0.0375618	0.241857	21.7902	0.87801	0.89353	NA
P47757	P18-CTX_H2B	0.106591	0.156451	21.5266	0.502945	0.545042	NA
P47802	P18-CTX_H2B	-0.875488	0.230407	21.5792	0.00100838	0.00190417	NA
P47809	P18-CTX_H2B	1.15894	0.131643	21.5516	1.38216e-08	7.26237e-08	NA
P47857	P18-CTX_H2B	-0.266236	0.194629	21.4576	0.185495	0.222299	NA
P47911	P18-CTX_H2B	-1.50512	0.155653	21.8706	2.34738e-09	1.52326e-08	NA
P47915	P18-CTX_H2B	-1.72412	0.2342	22.3484	2.0698e-07	8.44777e-07	NA
P47941	P18-CTX_H2B	1.9965	0.181003	22.3484	1.63746e-10	1.46237e-09	NA
P47962	P18-CTX_H2B	-1.4532	0.111418	21.4602	1.1309e-11	1.43001e-10	NA
P47963	P18-CTX_H2B	-2.25178	0.250721	22.3484	7.16343e-09	4.09815e-08	NA
P48036	P18-CTX_H2B	-1.39973	0.329994	20.6752	0.000375385	0.000768375	NA
P48193	P18-CTX_H2B	0.453893	0.280567	17.5387	0.123555	0.154144	NA
P48318	P18-CTX_H2B	-0.26283	0.344516	20.7376	0.454116	0.497304	NA
P48320	P18-CTX_H2B	-0.665687	0.346099	17.5437	0.0708128	0.0924805	NA
P48453	P18-CTX_H2B	0.746592	0.122334	21.5803	4.16663e-06	1.27113e-05	NA
P48678	P18-CTX_H2B	-4.86322	0.422299	21.6474	1.06636e-10	1.00194e-09	NA
P48722	P18-CTX_H2B	0.797521	0.174154	21.5351	0.000153705	0.000341203	NA
P48758	P18-CTX_H2B	-0.551146	0.151374	21.5938	0.00147547	0.00269589	NA
P48771	P18-CTX_H2B	-1.12686	0.165065	21.4361	8.48914e-07	2.96791e-06	NA
P48774	P18-CTX_H2B	-1.12949	0.319639	21.676	0.00189881	0.00340502	NA
P48962	P18-CTX_H2B	-1.09381	0.224473	21.4602	7.65135e-05	0.00018004	NA
P49025	P18-CTX_H2B	0.037128	0.143633	21.413	0.798495	0.821922	NA
P49070	P18-CTX_H2B	-0.429529	0.26847	22.3484	0.123661	0.154206	NA
P49312	P18-CTX_H2B	-3.54551	0.243304	21.6614	1.13283e-12	2.17408e-11	NA
P49442	P18-CTX_H2B	-0.527759	0.171245	21.4925	0.00555095	0.00903783	NA
P49443	P18-CTX_H2B	0.453773	0.127292	21.6591	0.00176407	0.00318664	NA
P49615	P18-CTX_H2B	0.181174	0.231701	21.8914	0.442631	0.486966	NA
P49722	P18-CTX_H2B	-0.94989	0.183079	22.3484	3.18863e-05	8.09422e-05	NA
P49817	P18-CTX_H2B	-0.866284	0.137632	21.4534	2.76739e-06	8.7791e-06	NA
P50096	P18-CTX_H2B	-0.0707868	0.523414	10.3484	0.895016	0.907424	NA
P50153	P18-CTX_H2B	-1.63703	0.156457	21.4397	6.96821e-10	5.23777e-09	NA
P50247	P18-CTX_H2B	-0.944294	0.307647	10.3484	0.0114091	0.0174128	NA
P50396	P18-CTX_H2B	0.178666	0.166722	21.8179	0.295591	0.338497	NA
P50516	P18-CTX_H2B	0.247976	0.17795	21.4556	0.177733	0.214039	NA
P50518	P18-CTX_H2B	-1.11826	0.140561	21.3923	7.89521e-08	3.50812e-07	NA
P50544	P18-CTX_H2B	-1.88766	0.187818	21.5117	1.38706e-09	9.6737e-09	NA
P50580	P18-CTX_H2B	-1.26199	0.266866	22.3484	9.79904e-05	0.000225286	NA
P51150	P18-CTX_H2B	0.184804	0.113046	21.4638	0.116679	0.146648	NA
P51163	P18-CTX_H2B	1.07695	0.161898	21.3484	1.2739e-06	4.32518e-06	NA
P51410	P18-CTX_H2B	-0.850809	0.195893	22.3484	0.000253009	0.000536554	NA
P51660	P18-CTX_H2B	-0.861622	0.169277	21.7731	4.36608e-05	0.000108391	NA
P51791	P18-CTX_H2B	-0.063318	0.365442	22.3484	0.864004	0.8806	NA
P51830	P18-CTX_H2B	1.79392	0.186065	21.6826	2.68906e-09	1.72024e-08	NA
P51863	P18-CTX_H2B	0.47945	0.159672	21.4286	0.00667951	0.0106825	NA
P51880	P18-CTX_H2B	-0.41445	0.358396	22.3484	0.25973	0.301514	NA
P51881	P18-CTX_H2B	-0.352781	0.1664	21.4314	0.0458291	0.0622871	NA
P52479	P18-CTX_H2B	-0.573048	0.173666	18.3634	0.0039018	0.00655386	NA
P52480	P18-CTX_H2B	0.0949918	0.136059	21.4248	0.492581	0.535132	NA
P52482	P18-CTX_H2B	-0.956121	0.238957	10.3484	0.00234808	0.00414475	NA
P52734	P18-CTX_H2B	1.09071	0.153997	22.3484	3.82781e-07	1.463e-06	NA
P52795	P18-CTX_H2B	0.701614	0.25723	22.3484	0.0121883	0.0184255	NA
P52800	P18-CTX_H2B	-0.311518	0.515733	19.3484	0.552842	0.592471	NA
P53702	P18-CTX_H2B	-0.565431	0.255033	21.7454	0.0373881	0.0513564	NA
P53810	P18-CTX_H2B	0.449149	0.16388	21.5524	0.0120714	0.0182589	NA
P53811	P18-CTX_H2B	0.276292	0.140184	22.3484	0.0612423	0.0809188	NA
P53986	P18-CTX_H2B	-0.12913	0.372712	22.3484	0.732237	0.762594	NA
P53994	P18-CTX_H2B	-0.545916	0.181227	22.3484	0.00633632	0.0101878	NA
P53996	P18-CTX_H2B	-0.84951	0.223587	22.3484	0.000961343	0.00182598	NA
P54071	P18-CTX_H2B	-0.969166	0.378282	21.3484	0.0180233	0.0262917	NA
P54227	P18-CTX_H2B	1.46157	0.511509	22.3484	0.00906843	0.0141192	NA
P54285	P18-CTX_H2B	1.08782	0.165186	21.7065	1.3582e-06	4.57694e-06	NA
P54728	P18-CTX_H2B	0.77679	0.249237	22.3484	0.00496275	0.00815373	NA
P54754	P18-CTX_H2B	0.019468	0.276314	21.5222	0.944481	0.950099	NA
P54763	P18-CTX_H2B	-0.607752	0.210303	11.3484	0.0142884	0.0212819	NA
P54775	P18-CTX_H2B	-1.14457	0.316493	22.3484	0.0015011	0.00274087	NA
P54822	P18-CTX_H2B	-0.0853157	0.21764	21.3484	0.698941	0.73336	NA
P54823	P18-CTX_H2B	-0.555046	0.146452	22.3484	0.000983905	0.00186491	NA
P54830	P18-CTX_H2B	2.933	0.265539	22.3484	1.59492e-10	1.42909e-09	NA
P55012	P18-CTX_H2B	2.01076	0.134367	21.8266	5.89041e-13	1.34111e-11	NA
P55088	P18-CTX_H2B	-1.05592	0.20653	19.4124	5.80015e-05	0.000140764	NA
P55096	P18-CTX_H2B	-0.472327	0.281162	22.3484	0.106901	0.134986	NA
P55258	P18-CTX_H2B	-0.569969	0.169976	21.5681	0.00293135	0.00504915	NA
P55264	P18-CTX_H2B	-1.0647	0.214987	21.6465	6.17722e-05	0.000148715	NA
P55288	P18-CTX_H2B	0.549547	0.140624	21.8914	0.000760364	0.00147494	NA
P55821	P18-CTX_H2B	1.97565	0.607806	22.3484	0.00361675	0.00613215	NA
P55937	P18-CTX_H2B	1.33494	0.302703	22.3484	0.000214624	0.000459473	NA
P56371	P18-CTX_H2B	-1.20503	0.213133	19.3759	1.7535e-05	4.67945e-05	NA
P56380	P18-CTX_H2B	0.342911	0.42362	22.3484	0.426775	0.471562	NA
P56382	P18-CTX_H2B	-0.547256	0.174709	21.5098	0.0049337	0.00811586	NA
P56391	P18-CTX_H2B	-0.522096	0.193644	21.6122	0.0133169	0.0199975	NA
P56395	P18-CTX_H2B	-0.471216	0.110768	21.4595	0.000339766	0.000701302	NA
P56399	P18-CTX_H2B	1.56328	0.119047	21.9371	7.20759e-12	9.67861e-11	NA
P56480	P18-CTX_H2B	-0.950061	0.232009	21.679	0.000490496	0.000984632	NA
P56564	P18-CTX_H2B	-0.602087	0.265049	21.519	0.0334776	0.0464447	NA
P56695	P18-CTX_H2B	0.103585	0.228946	21.7089	0.65544	0.69356	NA
P56812	P18-CTX_H2B	2.43548	0.212223	22.3484	7.6726e-11	7.27214e-10	NA
P56959	P18-CTX_H2B	-3.11273	0.168893	21.4534	1.23185e-14	5.74724e-13	NA
P57080	P18-CTX_H2B	-0.704342	0.291197	10.3484	0.035372	0.0488101	NA
P57722	P18-CTX_H2B	-1.82343	0.189626	21.6256	2.89008e-09	1.84013e-08	NA
P57746	P18-CTX_H2B	-0.405109	0.180914	21.4176	0.0358714	0.0493733	NA
P57759	P18-CTX_H2B	-0.501792	0.216381	22.3484	0.0299138	0.0419413	NA
P57776	P18-CTX_H2B	-1.15007	0.21883	22.3484	2.70935e-05	6.98238e-05	NA
P57780	P18-CTX_H2B	1.18351	0.120665	21.5824	2.07397e-09	1.36217e-08	NA
P58242	P18-CTX_H2B	0.596793	0.426552	22.3484	0.175507	0.211647	NA
P58252	P18-CTX_H2B	0.0208357	0.140421	22.3484	0.883373	0.897974	NA
P58281	P18-CTX_H2B	-0.448434	0.132056	21.4005	0.00267185	0.00465253	NA
P58389	P18-CTX_H2B	-0.265073	0.241671	20.3484	0.285525	0.328499	NA
P58404	P18-CTX_H2B	0.66431	0.141145	22.3484	0.000103518	0.000236788	NA
P58771	P18-CTX_H2B	1.14282	0.257644	22.3484	0.000201526	0.000435566	NA
P58871	P18-CTX_H2B	0.577905	0.199332	22.3484	0.00823634	0.0128755	NA
P59017	P18-CTX_H2B	0.14286	0.237618	22.003	0.553839	0.593305	NA
P59108	P18-CTX_H2B	1.36686	0.469889	20.3484	0.00857625	0.013376	NA
P59281	P18-CTX_H2B	1.65259	0.119325	22.3484	1.89256e-12	3.30404e-11	NA
P59325	P18-CTX_H2B	1.27178	0.180761	22.3484	4.24921e-07	1.60381e-06	NA
P59644	P18-CTX_H2B	0.264128	0.280149	21.6017	0.356203	0.399254	NA
P59759	P18-CTX_H2B	0.981794	0.132802	21.8605	2.219e-07	8.96213e-07	NA
P59764	P18-CTX_H2B	1.42533	0.128491	22.3484	1.47007e-10	1.32885e-09	NA
P59999	P18-CTX_H2B	-0.629157	0.130836	21.4453	8.93766e-05	0.000206712	NA
P60122	P18-CTX_H2B	-0.730648	0.149285	21.7848	6.9847e-05	0.000166232	NA
P60202	P18-CTX_H2B	2.06061	0.483859	18.6115	0.000442131	0.000897156	NA
P60229	P18-CTX_H2B	-0.539167	0.159883	22.3484	0.00270455	0.00470643	NA
P60335	P18-CTX_H2B	-0.0602567	0.161828	22.3484	0.713139	0.745655	NA
P60469	P18-CTX_H2B	1.95618	0.146398	22.3484	3.88001e-12	5.9996e-11	NA
P60487	P18-CTX_H2B	-0.513509	0.339342	22.3484	0.144231	0.176681	NA
P60670	P18-CTX_H2B	0.173575	0.260941	22.3484	0.512736	0.553657	NA
P60710	P18-CTX_H2B	1.03461	0.133737	22.3484	9.21886e-08	4.03008e-07	NA
P60761	P18-CTX_H2B	1.59874	0.343369	22.3484	0.000117201	0.000265616	NA
P60764	P18-CTX_H2B	1.23616	0.441096	14.3484	0.0138482	0.0207148	NA
P60766	P18-CTX_H2B	0.526631	0.213728	21.8694	0.0220803	0.0317985	NA
P60824	P18-CTX_H2B	-3.05336	0.218064	22.3484	1.51758e-12	2.73772e-11	NA
P60840	P18-CTX_H2B	0.854096	0.203327	21.645	0.000380647	0.000777381	NA
P60853	P18-CTX_H2B	-0.0125021	0.300381	22.3484	0.967171	0.971839	NA
P60867	P18-CTX_H2B	-1.37736	0.150376	21.8642	6.14933e-09	3.57083e-08	NA
P60879	P18-CTX_H2B	-0.111934	0.162585	21.4217	0.498551	0.540713	NA
P60904	P18-CTX_H2B	-0.566016	0.353206	21.9174	0.123359	0.153971	NA
P61021	P18-CTX_H2B	-0.144609	0.197876	21.8244	0.472673	0.515539	NA
P61027	P18-CTX_H2B	0.0859703	0.132318	21.498	0.522752	0.5629	NA
P61028	P18-CTX_H2B	-0.425618	0.209156	21.7416	0.0542312	0.0723261	NA
P61082	P18-CTX_H2B	-0.195932	0.13473	21.5184	0.160308	0.194963	NA
P61161	P18-CTX_H2B	0.609997	0.229541	22.3484	0.0142718	0.0212779	NA
P61164	P18-CTX_H2B	0.645777	0.179905	22.3484	0.00160206	0.00291146	NA
P61202	P18-CTX_H2B	0.199668	0.26061	21.7255	0.451827	0.495599	NA
P61222	P18-CTX_H2B	-0.360652	0.117456	21.8199	0.00563264	0.00913785	NA
P61226	P18-CTX_H2B	0.302905	0.331833	21.7393	0.371349	0.414893	NA
P61264	P18-CTX_H2B	-0.10519	0.11916	21.38	0.387183	0.431692	NA
P61294	P18-CTX_H2B	0.775341	0.148649	22.3484	2.98257e-05	7.59949e-05	NA
P61329	P18-CTX_H2B	-0.242009	0.202818	21.4624	0.245803	0.286205	NA
P61358	P18-CTX_H2B	-1.76558	0.178863	21.9106	1.59142e-09	1.08473e-08	NA
P61460	P18-CTX_H2B	1.49822	0.206499	21.3484	3.44283e-07	1.3309e-06	NA
P61750	P18-CTX_H2B	0.280648	0.122121	22.3484	0.0312724	0.0436652	NA
P61759	P18-CTX_H2B	0.595965	0.129214	22.3484	0.000130521	0.000293104	NA
P61804	P18-CTX_H2B	-0.217978	0.262523	22.3484	0.41514	0.459644	NA
P61922	P18-CTX_H2B	-0.239452	0.210705	21.5522	0.268255	0.310611	NA
P61957	P18-CTX_H2B	-3.02083	0.171206	21.7879	2.18158e-14	9.22401e-13	NA
P61963	P18-CTX_H2B	-0.354934	0.228647	22.3484	0.134632	0.166582	NA
P61979	P18-CTX_H2B	-4.03288	0.284428	21.5976	2.03515e-12	3.50468e-11	NA
P61982	P18-CTX_H2B	0.0943527	0.125248	21.5313	0.459412	0.502696	NA
P62071	P18-CTX_H2B	1.15023	0.113703	21.7968	1.07706e-09	7.66983e-09	NA
P62082	P18-CTX_H2B	-1.09156	0.189866	21.9413	8.86647e-06	2.52821e-05	NA
P62137	P18-CTX_H2B	0.434029	0.237107	22.3484	0.0805412	0.103783	NA
P62141	P18-CTX_H2B	-0.00683683	0.325744	22.3484	0.983441	0.985627	NA
P62192	P18-CTX_H2B	-1.63952	0.149697	21.5059	2.92779e-10	2.44525e-09	NA
P62196	P18-CTX_H2B	-1.05993	0.165315	21.7351	1.99671e-06	6.50194e-06	NA
P62242	P18-CTX_H2B	-1.35132	0.150628	21.7683	9.17785e-09	5.12067e-08	NA
P62245	P18-CTX_H2B	-0.327297	0.300074	21.3484	0.287553	0.330513	NA
P62259	P18-CTX_H2B	0.905168	0.173552	22.3484	2.98531e-05	7.59949e-05	NA
P62264	P18-CTX_H2B	-1.79861	0.181311	21.9775	1.41117e-09	9.81308e-09	NA
P62267	P18-CTX_H2B	-1.43082	0.180291	22.3484	6.03192e-08	2.72494e-07	NA
P62270	P18-CTX_H2B	-1.32048	0.186065	22.0114	4.04945e-07	1.53902e-06	NA
P62281	P18-CTX_H2B	-1.37682	0.193865	22.3484	3.66736e-07	1.41165e-06	NA
P62301	P18-CTX_H2B	-1.28124	0.224855	22.3484	9.34146e-06	2.64968e-05	NA
P62317	P18-CTX_H2B	-1.25919	0.396662	22.3484	0.00433057	0.00720696	NA
P62331	P18-CTX_H2B	0.401003	0.355143	20.3484	0.271978	0.314652	NA
P62334	P18-CTX_H2B	-0.611943	0.146219	21.8292	0.000389296	0.00079325	NA
P62482	P18-CTX_H2B	0.429871	0.216445	19.3484	0.0613804	0.0810616	NA
P62484	P18-CTX_H2B	1.02579	0.200317	22.3484	3.7582e-05	9.41637e-05	NA
P62500	P18-CTX_H2B	2.36764	0.273013	20.3949	2.79813e-08	1.3521e-07	NA
P62631	P18-CTX_H2B	-0.68731	0.227482	21.5012	0.00638264	0.0102501	NA
P62702	P18-CTX_H2B	-1.5954	0.156193	21.8347	8.87468e-10	6.45561e-09	NA
P62715	P18-CTX_H2B	1.66369	0.205421	21.0882	6.55542e-08	2.94179e-07	NA
P62717	P18-CTX_H2B	-1.66829	0.123432	21.5492	5.35698e-12	7.67491e-11	NA
P62743	P18-CTX_H2B	-0.268781	0.145527	21.4103	0.0786233	0.101457	NA
P62746	P18-CTX_H2B	0.965456	0.182306	22.3484	2.45736e-05	6.40619e-05	NA
P62751	P18-CTX_H2B	-1.34662	0.20198	22.3484	9.74434e-07	3.36618e-06	NA
P62754	P18-CTX_H2B	-1.81267	0.217016	22.3484	2.53589e-08	1.24766e-07	NA
P62761	P18-CTX_H2B	0.960239	0.275259	21.6623	0.00211647	0.00375798	NA
P62806	P18-CTX_H2B	-1.40495	0.155709	22.3484	6.59963e-09	3.80781e-08	NA
P62812	P18-CTX_H2B	-1.61586	0.144937	21.3765	2.26597e-10	1.94042e-09	NA
P62814	P18-CTX_H2B	0.610063	0.144372	21.4459	0.000364365	0.000747516	NA
P62821	P18-CTX_H2B	-0.0868037	0.102592	21.3991	0.406854	0.451948	NA
P62823	P18-CTX_H2B	1.11202	0.183756	21.5107	4.75173e-06	1.43506e-05	NA
P62827	P18-CTX_H2B	-0.471332	0.151634	21.5771	0.00520413	0.00852444	NA
P62830	P18-CTX_H2B	-1.23165	0.212202	22.3484	7.2569e-06	2.10699e-05	NA
P62838	P18-CTX_H2B	-0.703511	0.248014	22.3484	0.00951101	0.0147404	NA
P62849	P18-CTX_H2B	-0.82016	0.263707	21.8782	0.00512548	0.0084007	NA
P62855	P18-CTX_H2B	-1.5587	0.21936	22.0102	3.97303e-07	1.5121e-06	NA
P62858	P18-CTX_H2B	0.235041	0.401978	22.3484	0.564599	0.603637	NA
P62869	P18-CTX_H2B	-0.386941	0.147689	22.3484	0.0155194	0.0229609	NA
P62874	P18-CTX_H2B	-0.793392	0.193239	21.6081	0.000480452	0.000965901	NA
P62880	P18-CTX_H2B	0.163557	0.219076	21.778	0.463304	0.50675	NA
P62881	P18-CTX_H2B	-0.462217	0.142313	21.4001	0.00378407	0.00639581	NA
P62889	P18-CTX_H2B	-1.09037	0.168629	22.3484	1.54323e-06	5.13652e-06	NA
P62897	P18-CTX_H2B	-0.115707	0.255918	21.8907	0.655627	0.69356	NA
P62900	P18-CTX_H2B	-1.6404	0.17801	22.3484	4.53342e-09	2.70804e-08	NA
P62908	P18-CTX_H2B	-1.09014	0.183176	21.8887	5.57335e-06	1.66246e-05	NA
P62911	P18-CTX_H2B	-1.52508	0.219543	22.3484	5.1849e-07	1.91149e-06	NA
P62962	P18-CTX_H2B	0.415081	0.121156	21.6397	0.00245871	0.00431751	NA
P62965	P18-CTX_H2B	1.74512	0.237069	21.5701	2.57998e-07	1.03123e-06	NA
P62983	P18-CTX_H2B	-0.0183706	0.133165	22.3484	0.891512	0.905228	NA
P62996	P18-CTX_H2B	-3.97073	0.266249	21.735	6.76921e-13	1.44373e-11	NA
P63001	P18-CTX_H2B	0.138852	0.132217	21.5059	0.305293	0.348428	NA
P63005	P18-CTX_H2B	0.621225	0.178654	21.9269	0.00214536	0.00380429	NA
P63011	P18-CTX_H2B	0.903254	0.159472	21.4234	1.18282e-05	3.27606e-05	NA
P63017	P18-CTX_H2B	0.973181	0.111919	21.5605	1.70012e-08	8.69666e-08	NA
P63028	P18-CTX_H2B	0.823958	0.155263	22.3484	2.39258e-05	6.2675e-05	NA
P63030	P18-CTX_H2B	-1.02322	0.23538	10.3484	0.00133849	0.00246727	NA
P63034	P18-CTX_H2B	2.42513	0.468001	15.6116	9.82232e-05	0.00022563	NA
P63037	P18-CTX_H2B	-0.395448	0.138248	21.5498	0.00921261	0.0143354	NA
P63038	P18-CTX_H2B	-0.754982	0.239822	21.7901	0.0047055	0.00775461	NA
P63040	P18-CTX_H2B	0.426293	0.443775	18.5079	0.349133	0.392503	NA
P63042	P18-CTX_H2B	1.44301	0.273349	10.3484	0.000319559	0.000662892	NA
P63044	P18-CTX_H2B	-0.660888	0.139402	21.4117	0.000105606	0.000240952	NA
P63046	P18-CTX_H2B	-0.12601	0.438908	20.3484	0.77694	0.802957	NA
P63080	P18-CTX_H2B	-1.26906	0.322794	17.4078	0.00103396	0.00194975	NA
P63085	P18-CTX_H2B	0.378256	0.112379	21.4181	0.00286494	0.00495369	NA
P63089	P18-CTX_H2B	-0.804624	0.219005	22.3484	0.00130516	0.00241405	NA
P63101	P18-CTX_H2B	0.422876	0.120703	21.4786	0.0020619	0.00367656	NA
P63137	P18-CTX_H2B	-2.32878	0.268613	21.4564	1.86015e-08	9.39097e-08	NA
P63168	P18-CTX_H2B	-0.44854	0.296489	21.9087	0.144613	0.177069	NA
P63213	P18-CTX_H2B	-1.70536	0.142427	21.4839	5.64999e-11	5.66255e-10	NA
P63216	P18-CTX_H2B	-1.46765	0.180122	21.4185	5.29981e-08	2.42661e-07	NA
P63248	P18-CTX_H2B	1.31063	0.321779	20.3484	0.000575686	0.00114376	NA
P63280	P18-CTX_H2B	-0.524498	0.164912	22.3484	0.00426956	0.00710981	NA
P63300	P18-CTX_H2B	-0.889281	0.165544	21.5889	2.28768e-05	5.99851e-05	NA
P63318	P18-CTX_H2B	1.23835	0.373043	21.5894	0.00317081	0.00544085	NA
P63321	P18-CTX_H2B	-0.234928	0.138694	21.5685	0.104685	0.132621	NA
P63323	P18-CTX_H2B	-0.829594	0.157638	22.3484	2.66299e-05	6.87601e-05	NA
P63325	P18-CTX_H2B	-1.54109	0.18012	22.3484	1.67557e-08	8.58732e-08	NA
P63328	P18-CTX_H2B	0.73514	0.182392	21.4437	0.000583637	0.00115617	NA
P63330	P18-CTX_H2B	1.75571	0.139222	22.3484	1.22273e-11	1.51775e-10	NA
P67778	P18-CTX_H2B	-1.17729	0.197092	21.5775	5.61591e-06	1.6718e-05	NA
P68037	P18-CTX_H2B	0.602882	0.1548	22.3484	0.000761832	0.00147673	NA
P68040	P18-CTX_H2B	-1.04773	0.197886	21.9914	2.59232e-05	6.72562e-05	NA
P68134	P18-CTX_H2B	0.993187	0.290876	22.3484	0.00244414	0.00429749	NA
P68181	P18-CTX_H2B	0.249609	0.200316	21.7638	0.225984	0.265299	NA
P68254	P18-CTX_H2B	0.683269	0.175055	22.3484	0.000745987	0.00144913	NA
P68368	P18-CTX_H2B	1.36499	0.290731	21.4976	0.000116776	0.000264875	NA
P68369	P18-CTX_H2B	2.05584	0.11385	21.6224	1.58766e-14	7.28173e-13	NA
P68372	P18-CTX_H2B	0.270666	0.175695	21.4706	0.138038	0.170329	NA
P68404	P18-CTX_H2B	1.93345	0.174816	21.5859	2.34142e-10	1.98617e-09	NA
P68510	P18-CTX_H2B	-0.365888	0.225999	21.7202	0.119882	0.150325	NA
P69566	P18-CTX_H2B	0.2722	0.153574	21.6459	0.0903975	0.115439	NA
P70122	P18-CTX_H2B	-0.539979	0.2582	10.3484	0.0620668	0.0818484	NA
P70168	P18-CTX_H2B	0.197312	0.280613	22.3484	0.489225	0.532305	NA
P70175	P18-CTX_H2B	0.981968	0.12127	21.4522	5.80336e-08	2.63047e-07	NA
P70188	P18-CTX_H2B	0.973419	0.203194	22.3484	8.42343e-05	0.00019616	NA
P70195	P18-CTX_H2B	-1.17303	0.185078	21.958	2.25048e-06	7.28444e-06	NA
P70206	P18-CTX_H2B	1.07902	0.139518	22.3484	9.26372e-08	4.04317e-07	NA
P70207	P18-CTX_H2B	-0.528709	0.255611	10.3484	0.0645259	0.0848019	NA
P70208	P18-CTX_H2B	0.907345	0.362823	17.4503	0.0226128	0.0325307	NA
P70211	P18-CTX_H2B	1.69849	0.407847	19.9873	0.000479386	0.000964474	NA
P70232	P18-CTX_H2B	1.59219	0.226276	21.7239	4.9838e-07	1.84742e-06	NA
P70236	P18-CTX_H2B	0.213116	0.116765	22.3484	0.0813719	0.104691	NA
P70265	P18-CTX_H2B	1.01634	0.130804	22.007	9.52883e-08	4.1455e-07	NA
P70268	P18-CTX_H2B	1.55078	0.205937	22.3484	1.43472e-07	6.03239e-07	NA
P70290	P18-CTX_H2B	1.79922	0.391969	18.4861	0.000213173	0.000456726	NA
P70296	P18-CTX_H2B	1.39582	0.131116	22.3484	3.20413e-10	2.61945e-09	NA
P70297	P18-CTX_H2B	2.10308	0.241341	22.3484	1.21811e-08	6.46313e-08	NA
P70318	P18-CTX_H2B	-1.75669	0.142751	21.5167	3.30196e-11	3.54568e-10	NA
P70336	P18-CTX_H2B	1.5037	0.127317	21.4296	7.54585e-11	7.2408e-10	NA
P70349	P18-CTX_H2B	0.0318708	0.162733	22.3484	0.846499	0.864714	NA
P70362	P18-CTX_H2B	-0.894968	0.146827	21.6354	4.1928e-06	1.27767e-05	NA
P70372	P18-CTX_H2B	-2.88183	0.266662	21.644	3.47729e-10	2.8342e-09	NA
P70398	P18-CTX_H2B	2.54077	0.153878	22.3484	5.21046e-14	1.80763e-12	NA
P70399	P18-CTX_H2B	-3.96124	0.39499	22.3484	9.74801e-10	6.97834e-09	NA
P70404	P18-CTX_H2B	-1.40716	0.265524	21.5305	2.73904e-05	7.03687e-05	NA
P70414	P18-CTX_H2B	0.149365	0.154945	21.6256	0.34571	0.388978	NA
P70429	P18-CTX_H2B	0.686089	0.221895	22.3484	0.00525952	0.00859955	NA
P70441	P18-CTX_H2B	-0.744114	0.299842	21.7303	0.0213057	0.0307647	NA
P70451	P18-CTX_H2B	1.55366	0.27415	22.3484	1.0056e-05	2.82749e-05	NA
P70670	P18-CTX_H2B	-0.982673	0.151063	22.3484	1.41123e-06	4.74383e-06	NA
P70677	P18-CTX_H2B	1.2155	0.229294	21.6431	2.68469e-05	6.92542e-05	NA
P70698	P18-CTX_H2B	0.833947	0.220292	22.3484	0.000994328	0.00188157	NA
P70704	P18-CTX_H2B	1.48773	0.114395	21.4542	1.19996e-11	1.50258e-10	NA
P80313	P18-CTX_H2B	-0.451771	0.139014	21.8031	0.00370358	0.00627152	NA
P80314	P18-CTX_H2B	-0.211293	0.176371	22.3484	0.243468	0.283731	NA
P80315	P18-CTX_H2B	-0.586908	0.123967	21.8403	0.000102215	0.000234202	NA
P80316	P18-CTX_H2B	0.085197	0.129046	22.3484	0.51587	0.556375	NA
P80317	P18-CTX_H2B	-0.0708694	0.12689	22.3484	0.582049	0.621557	NA
P80318	P18-CTX_H2B	-0.681173	0.156955	22.3484	0.000255065	0.000539645	NA
P80560	P18-CTX_H2B	1.84035	0.204134	22.3484	6.69772e-09	3.84799e-08	NA
P81122	P18-CTX_H2B	-0.169122	0.202141	22.3484	0.411645	0.456311	NA
P83510	P18-CTX_H2B	1.26507	0.106236	22.006	4.59101e-11	4.74171e-10	NA
P83741	P18-CTX_H2B	2.30932	0.177681	22.3484	6.73355e-12	9.26871e-11	NA
P84075	P18-CTX_H2B	1.46515	0.258091	21.7376	1.08795e-05	3.04447e-05	NA
P84084	P18-CTX_H2B	0.20104	0.158097	21.8756	0.216862	0.255922	NA
P84086	P18-CTX_H2B	1.831	0.271341	10.3484	4.27703e-05	0.000106452	NA
P84089	P18-CTX_H2B	-1.76479	0.279827	22.3484	2.23007e-06	7.23571e-06	NA
P84091	P18-CTX_H2B	0.274232	0.113543	21.3811	0.0247514	0.0352883	NA
P84096	P18-CTX_H2B	0.563903	0.243217	20.3484	0.0309344	0.0432379	NA
P84104	P18-CTX_H2B	-1.67881	0.298265	22.3484	1.10283e-05	3.08292e-05	NA
P84244	P18-CTX_H2B	-0.726459	0.199841	22.3484	0.00143422	0.00262941	NA
P84309	P18-CTX_H2B	3.55958	0.484601	19.3993	5.11945e-07	1.88993e-06	NA
P97300	P18-CTX_H2B	-0.351427	0.153862	21.3999	0.0326764	0.045438	NA
P97315	P18-CTX_H2B	-0.279532	0.156893	21.4579	0.0889624	0.113768	NA
P97318	P18-CTX_H2B	1.04023	0.411082	10.3484	0.0291409	0.0410064	NA
P97351	P18-CTX_H2B	-1.89486	0.121663	21.5043	3.4372e-13	8.53309e-12	NA
P97370	P18-CTX_H2B	-0.59408	0.242742	21.5639	0.0230208	0.0330123	NA
P97371	P18-CTX_H2B	0.203311	0.157089	22.3484	0.208798	0.247052	NA
P97379	P18-CTX_H2B	-2.01261	0.167753	21.5973	5.08175e-11	5.16963e-10	NA
P97384	P18-CTX_H2B	1.20964	0.2298	21.6164	2.94409e-05	7.51577e-05	NA
P97393	P18-CTX_H2B	1.41511	0.154211	21.9875	5.65894e-09	3.31452e-08	NA
P97411	P18-CTX_H2B	2.22934	0.140398	22.3484	1.16851e-13	3.51331e-12	NA
P97412	P18-CTX_H2B	1.93338	0.22562	22.3484	1.6311e-08	8.39119e-08	NA
P97427	P18-CTX_H2B	0.989727	0.108838	22.3484	5.7461e-09	3.3583e-08	NA
P97434	P18-CTX_H2B	1.37915	0.135166	22.3484	7.08164e-10	5.2769e-09	NA
P97441	P18-CTX_H2B	-0.542057	0.386524	16.4306	0.179411	0.21558	NA
P97445	P18-CTX_H2B	-1.26642	0.286193	21.4612	0.000224791	0.000478587	NA
P97447	P18-CTX_H2B	1.30739	0.194951	22.3484	8.91498e-07	3.09678e-06	NA
P97450	P18-CTX_H2B	1.36086	0.495376	22.3484	0.0116607	0.0177275	NA
P97461	P18-CTX_H2B	-1.15727	0.150114	22.3484	9.76443e-08	4.24118e-07	NA
P97470	P18-CTX_H2B	-1.58711	0.258062	10.3484	9.36168e-05	0.000215597	NA
P97494	P18-CTX_H2B	2.01046	0.265036	10.3484	1.53752e-05	4.12751e-05	NA
P97765	P18-CTX_H2B	0.777886	0.321815	21.7563	0.0244819	0.0349594	NA
P97770	P18-CTX_H2B	0.460634	0.450351	15.4868	0.3221	0.365758	NA
P97772	P18-CTX_H2B	0.226199	0.150224	20.6994	0.147242	0.179962	NA
P97789	P18-CTX_H2B	0.420215	0.128013	21.8416	0.00342245	0.00583196	NA
P97792	P18-CTX_H2B	1.01535	0.172765	21.6533	6.91854e-06	2.02834e-05	NA
P97797	P18-CTX_H2B	-0.311637	0.192143	21.4465	0.119435	0.149911	NA
P97798	P18-CTX_H2B	1.37364	0.21211	22.3484	1.50831e-06	5.03265e-06	NA
P97807	P18-CTX_H2B	-0.908443	0.197293	21.4895	0.000145358	0.000324003	NA
P97820	P18-CTX_H2B	1.95405	0.21305	21.3484	7.4348e-09	4.21773e-08	NA
P97823	P18-CTX_H2B	-1.3886	0.293975	10.3484	0.00073943	0.0014395	NA
P97868	P18-CTX_H2B	-1.59512	0.223973	21.6699	4.19749e-07	1.59058e-06	NA
P97950	P18-CTX_H2B	1.68042	0.245994	22.3484	6.72059e-07	2.40873e-06	NA
P98195	P18-CTX_H2B	0.88076	0.325416	20.4141	0.0134251	0.0201266	NA
P98200	P18-CTX_H2B	0.241817	0.227577	22.3484	0.299323	0.342337	NA
P98203	P18-CTX_H2B	1.12667	0.128523	22.3484	1.09735e-08	5.96273e-08	NA
P99024	P18-CTX_H2B	0.807783	0.166308	22.3484	7.15521e-05	0.000169842	NA
P99026	P18-CTX_H2B	-1.06414	0.214754	22.3484	5.6293e-05	0.00013711	NA
P99027	P18-CTX_H2B	-0.408645	0.246996	22.3484	0.112013	0.141111	NA
P99029	P18-CTX_H2B	-0.306059	0.134141	21.4096	0.0328376	0.0456386	NA
Q00493	P18-CTX_H2B	-1.84703	0.353562	10.3484	0.000346537	0.000713102	NA
Q00612	P18-CTX_H2B	1.41876	0.153805	22.3484	4.45351e-09	2.67211e-08	NA
Q00PI9	P18-CTX_H2B	-3.34776	0.162477	21.4376	1.29469e-15	1.23189e-13	NA
Q01063	P18-CTX_H2B	2.02742	0.168172	22.3484	2.95485e-11	3.22412e-10	NA
Q01065	P18-CTX_H2B	3.73897	0.259936	22.3484	8.80886e-13	1.78538e-11	NA
Q01097	P18-CTX_H2B	-1.41133	0.140667	21.4075	1.50344e-09	1.03519e-08	NA
Q01405	P18-CTX_H2B	0.268747	0.131799	21.9073	0.0536887	0.071815	NA
Q01768	P18-CTX_H2B	-0.313375	0.174987	22.3484	0.0868742	0.11136	NA
Q01853	P18-CTX_H2B	0.358761	0.0940927	21.4215	0.00098721	0.00186941	NA
Q02053	P18-CTX_H2B	0.197142	0.106442	21.6173	0.077717	0.100335	NA
Q02248	P18-CTX_H2B	1.71934	0.11855	22.3484	7.45523e-13	1.54652e-11	NA
Q02257	P18-CTX_H2B	-0.19594	0.434902	22.3484	0.656664	0.694385	NA
Q02357	P18-CTX_H2B	0.412775	0.458763	10.3484	0.388707	0.433213	NA
Q03137	P18-CTX_H2B	1.45893	0.108303	21.6164	5.45439e-12	7.7682e-11	NA
Q03141	P18-CTX_H2B	0.693197	0.138362	21.6819	5.35402e-05	0.000130807	NA
Q03173	P18-CTX_H2B	0.662074	0.172726	22.3484	0.000885522	0.00169584	NA
Q03265	P18-CTX_H2B	-1.08871	0.22349	21.5011	7.63837e-05	0.000179891	NA
Q03958	P18-CTX_H2B	-0.0550297	0.148012	22.3484	0.713549	0.745735	NA
Q04447	P18-CTX_H2B	0.696857	0.1556	21.4946	0.000196928	0.000426993	NA
Q04690	P18-CTX_H2B	1.94639	0.107532	22.3484	7.66722e-15	3.9122e-13	NA
Q04735	P18-CTX_H2B	0.762699	0.141616	22.3484	1.97744e-05	5.23065e-05	NA
Q04750	P18-CTX_H2B	-2.81794	0.201968	21.5	2.99264e-12	4.87837e-11	NA
Q05186	P18-CTX_H2B	0.375291	0.288076	22.3484	0.205925	0.2444	NA
Q05512	P18-CTX_H2B	-0.409924	0.20479	20.4664	0.058753	0.077896	NA
Q05816	P18-CTX_H2B	0.301121	0.194046	21.9037	0.135041	0.166935	NA
Q05BC3	P18-CTX_H2B	1.13195	0.142303	22.3484	5.80318e-08	2.63047e-07	NA
Q05D44	P18-CTX_H2B	-0.987436	0.367258	22.3484	0.0133058	0.019992	NA
Q06138	P18-CTX_H2B	0.274428	0.247759	10.3484	0.293097	0.33621	NA
Q06180	P18-CTX_H2B	-0.139797	0.400222	10.3484	0.733869	0.763494	NA
Q06185	P18-CTX_H2B	-0.533768	0.173401	21.5197	0.00559279	0.00908954	NA
Q06649	P18-CTX_H2B	1.44539	0.429887	21.3484	0.00289909	0.00500635	NA
Q07076	P18-CTX_H2B	1.7642	0.165597	21.5757	4.68389e-10	3.69522e-09	NA
Q07813	P18-CTX_H2B	-0.446776	0.193276	22.3484	0.0303903	0.0425874	NA
Q08274	P18-CTX_H2B	1.2738	0.296819	22.3484	0.000287362	0.000604196	NA
Q08460	P18-CTX_H2B	0.545329	0.381237	20.3885	0.167745	0.203626	NA
Q09143	P18-CTX_H2B	-1.54502	0.193454	22.3484	5.42525e-08	2.47985e-07	NA
Q0GNC1	P18-CTX_H2B	0.764896	0.252418	18.3656	0.00707672	0.0112578	NA
Q0KL02	P18-CTX_H2B	1.57605	0.158265	22.3484	1.10994e-09	7.8832e-09	NA
Q0P5W1	P18-CTX_H2B	1.36815	0.205572	13.6555	1.23149e-05	3.37974e-05	NA
Q0PHV7	P18-CTX_H2B	-0.787122	0.240615	22.3484	0.00344195	0.00585746	NA
Q0VBF8	P18-CTX_H2B	0.235329	0.227875	21.5748	0.313178	0.356524	NA
Q0VBL3	P18-CTX_H2B	-2.53721	0.217775	20.5038	1.6852e-10	1.49513e-09	NA
Q0VE82	P18-CTX_H2B	1.74778	0.191349	22.3484	5.30951e-09	3.12338e-08	NA
Q11011	P18-CTX_H2B	1.00826	0.137349	21.7815	2.53776e-07	1.01887e-06	NA
Q11136	P18-CTX_H2B	0.9188	0.185897	22.3484	5.80629e-05	0.000140787	NA
Q148V7	P18-CTX_H2B	1.02906	0.118439	21.5377	1.73815e-08	8.84106e-08	NA
Q14BI2	P18-CTX_H2B	1.91754	0.212834	21.5296	9.38247e-09	5.21334e-08	NA
Q14CH0	P18-CTX_H2B	1.48895	0.207722	22.3484	3.16858e-07	1.24116e-06	NA
Q2KN98	P18-CTX_H2B	1.28554	0.149063	22.3484	1.45961e-08	7.53763e-08	NA
Q2M3X8	P18-CTX_H2B	1.47608	0.175491	21.5588	2.97892e-08	1.42672e-07	NA
Q2NL51	P18-CTX_H2B	0.580244	0.131271	21.5906	0.000224651	0.000478587	NA
Q2PFD7	P18-CTX_H2B	-0.738424	0.133163	21.3856	1.57066e-05	4.21228e-05	NA
Q2WF71	P18-CTX_H2B	0.670618	0.208901	11.3484	0.0079982	0.0125755	NA
Q32MW3	P18-CTX_H2B	-1.71871	0.191108	19.4992	2.26668e-08	1.12338e-07	NA
Q3B7Z2	P18-CTX_H2B	0.786689	0.145806	21.7212	2.12053e-05	5.58185e-05	NA
Q3KNM2	P18-CTX_H2B	-0.404977	0.181207	22.3484	0.0357318	0.0492556	NA
Q3SXD3	P18-CTX_H2B	-0.418016	0.212565	10.3484	0.0766214	0.0992045	NA
Q3TC72	P18-CTX_H2B	-0.738567	0.289178	10.3484	0.0279712	0.0395043	NA
Q3TCJ1	P18-CTX_H2B	0.725162	0.129587	21.9061	1.28043e-05	3.50337e-05	NA
Q3TDD9	P18-CTX_H2B	0.298406	0.127825	21.7997	0.0291923	0.0410574	NA
Q3TDK6	P18-CTX_H2B	0.329898	0.200725	21.5018	0.114817	0.144442	NA
Q3TDQ1	P18-CTX_H2B	-0.832859	0.19727	22.3484	0.000341036	0.000703387	NA
Q3TDX8	P18-CTX_H2B	1.76777	0.259081	22.3484	6.84118e-07	2.44547e-06	NA
Q3TEA8	P18-CTX_H2B	-1.736	0.178864	21.7681	2.29939e-09	1.49571e-08	NA
Q3TEL6	P18-CTX_H2B	0.054034	0.393939	21.3484	0.892187	0.905573	NA
Q3TES0	P18-CTX_H2B	1.5477	0.144799	21.6226	4.30518e-10	3.45692e-09	NA
Q3THE2	P18-CTX_H2B	0.289302	0.353701	22.3484	0.422034	0.467085	NA
Q3THG9	P18-CTX_H2B	0.911918	0.257526	22.3484	0.00180149	0.00324556	NA
Q3THK7	P18-CTX_H2B	-1.06015	0.113835	21.4125	5.55674e-09	3.26172e-08	NA
Q3THS6	P18-CTX_H2B	-0.590495	0.13935	21.4876	0.000352802	0.000725442	NA
Q3THW5	P18-CTX_H2B	-0.427387	0.162077	22.3484	0.0149422	0.0221433	NA
Q3TJZ6	P18-CTX_H2B	-0.456023	0.203212	21.8879	0.0352731	0.0487233	NA
Q3TKT4	P18-CTX_H2B	-4.12516	0.401616	22.3484	6.25912e-10	4.75764e-09	NA
Q3TLH4	P18-CTX_H2B	-0.853794	0.199669	22.0113	0.000307128	0.000641768	NA
Q3TLI0	P18-CTX_H2B	1.61529	0.235899	22.3484	6.47898e-07	2.3283e-06	NA
Q3TMH2	P18-CTX_H2B	1.98416	0.333686	21.7209	5.81992e-06	1.72873e-05	NA
Q3TPE9	P18-CTX_H2B	0.587044	0.232794	10.3484	0.0295859	0.0415245	NA
Q3TPX4	P18-CTX_H2B	1.55638	0.214201	22.3484	2.55288e-07	1.02342e-06	NA
Q3TVA9	P18-CTX_H2B	1.58476	0.150247	22.3484	3.81187e-10	3.09757e-09	NA
Q3TWL2	P18-CTX_H2B	0.418935	0.216476	22.3484	0.0657137	0.0861954	NA
Q3TWW8	P18-CTX_H2B	-2.76843	0.217265	21.9378	1.29594e-11	1.594e-10	NA
Q3TXS7	P18-CTX_H2B	-0.368303	0.200505	21.974	0.0797921	0.102916	NA
Q3TXX4	P18-CTX_H2B	1.89023	0.634945	21.7946	0.0070014	0.0111577	NA
Q3TY60	P18-CTX_H2B	2.13521	0.16101	22.3484	4.51169e-12	6.78257e-11	NA
Q3TYX3	P18-CTX_H2B	2.86203	0.172886	22.3484	4.93809e-14	1.75822e-12	NA
Q3TZZ7	P18-CTX_H2B	0.849905	0.244625	22.3484	0.0021164	0.00375798	NA
Q3U0M1	P18-CTX_H2B	1.06098	0.232025	22.3484	0.000143839	0.00032088	NA
Q3U0V1	P18-CTX_H2B	-5.00625	0.279511	21.506	2.08944e-14	9.11938e-13	NA
Q3U1F9	P18-CTX_H2B	1.06687	0.236498	22.3484	0.000167372	0.000368218	NA
Q3U1J4	P18-CTX_H2B	-0.800301	0.212717	21.5009	0.00110897	0.00208249	NA
Q3U1Y4	P18-CTX_H2B	1.26153	0.230594	22.3484	1.61063e-05	4.31521e-05	NA
Q3U214	P18-CTX_H2B	0.805319	0.19915	21.6359	0.000557077	0.00110924	NA
Q3U2P1	P18-CTX_H2B	-0.118056	0.332201	22.3484	0.725642	0.756389	NA
Q3U308	P18-CTX_H2B	1.83888	0.211268	22.3484	1.24308e-08	6.56985e-08	NA
Q3UBX0	P18-CTX_H2B	-0.904411	0.40156	19.4225	0.0360538	0.0495992	NA
Q3UDK1	P18-CTX_H2B	2.97536	0.345766	21.8931	1.7925e-08	9.06635e-08	NA
Q3UEB3	P18-CTX_H2B	-1.40787	0.245313	22.3484	8.47227e-06	2.42603e-05	NA
Q3UEZ8	P18-CTX_H2B	3.75139	0.544621	17.5138	2.23573e-06	7.24538e-06	NA
Q3UFQ8	P18-CTX_H2B	1.0754	0.282758	22.3484	0.000952456	0.00181248	NA
Q3UFT3	P18-CTX_H2B	2.84348	0.194137	22.3484	6.1025e-13	1.35355e-11	NA
Q3UGS4	P18-CTX_H2B	0.841015	0.452323	22.3484	0.0761978	0.0987033	NA
Q3UGY8	P18-CTX_H2B	1.61797	0.164826	22.3484	1.44505e-09	9.97529e-09	NA
Q3UH60	P18-CTX_H2B	0.601806	0.104543	21.4347	9.51968e-06	2.69741e-05	NA
Q3UH66	P18-CTX_H2B	2.57872	0.19494	22.3484	4.74194e-12	6.91515e-11	NA
Q3UH93	P18-CTX_H2B	2.28386	0.223848	22.3484	7.09023e-10	5.2769e-09	NA
Q3UHB8	P18-CTX_H2B	0.31227	0.222806	21.7104	0.175189	0.211541	NA
Q3UHC7	P18-CTX_H2B	0.888539	0.113196	21.6176	9.12337e-08	4.00777e-07	NA
Q3UHD1	P18-CTX_H2B	-0.460507	0.217014	21.5846	0.045563	0.0619565	NA
Q3UHD2	P18-CTX_H2B	-0.0419103	0.200685	18.4556	0.836864	0.856164	NA
Q3UHD3	P18-CTX_H2B	0.413921	0.33057	22.3484	0.223464	0.262454	NA
Q3UHD6	P18-CTX_H2B	0.9646	0.148122	21.7841	1.5732e-06	5.22981e-06	NA
Q3UHD9	P18-CTX_H2B	-0.197975	0.175794	21.5234	0.272492	0.315113	NA
Q3UHG7	P18-CTX_H2B	1.19352	0.275101	20.3484	0.000307982	0.000643056	NA
Q3UHH1	P18-CTX_H2B	1.05779	0.232155	20.4092	0.000183256	0.000401207	NA
Q3UHH2	P18-CTX_H2B	0.603401	0.161774	21.7521	0.0011803	0.00219663	NA
Q3UHJ0	P18-CTX_H2B	0.520196	0.13893	21.4094	0.0011646	0.0021689	NA
Q3UHK1	P18-CTX_H2B	0.174295	0.419848	21.9587	0.682069	0.717883	NA
Q3UHK6	P18-CTX_H2B	2.02656	0.173688	22.3484	5.57426e-11	5.60742e-10	NA
Q3UHL1	P18-CTX_H2B	-1.20655	0.241895	21.515	5.76775e-05	0.000140104	NA
Q3UHX2	P18-CTX_H2B	0.606468	0.227692	22.3484	0.0140785	0.0210245	NA
Q3UIU2	P18-CTX_H2B	-0.706929	0.230255	21.5911	0.00568328	0.00921448	NA
Q3UJB9	P18-CTX_H2B	-1.10874	0.189698	21.3484	7.88412e-06	2.2648e-05	NA
Q3UJD6	P18-CTX_H2B	0.612364	0.156847	22.3484	0.000744101	0.00144651	NA
Q3UJP5	P18-CTX_H2B	1.42087	0.204694	22.3484	5.24544e-07	1.93118e-06	NA
Q3UJU9	P18-CTX_H2B	-0.289829	0.215097	21.6763	0.191757	0.229194	NA
Q3UKC1	P18-CTX_H2B	2.43937	0.193109	22.3484	1.18274e-11	1.4886e-10	NA
Q3UKJ7	P18-CTX_H2B	-0.790558	0.134764	21.5457	7.23548e-06	2.10529e-05	NA
Q3UL36	P18-CTX_H2B	-0.466609	0.243569	22.3484	0.0682826	0.0893485	NA
Q3ULJ0	P18-CTX_H2B	-0.150368	0.213261	21.6914	0.488257	0.531465	NA
Q3UM45	P18-CTX_H2B	1.00982	0.217883	21.6608	0.000132705	0.000297761	NA
Q3UMB5	P18-CTX_H2B	2.29983	0.237861	22.3484	1.9049e-09	1.26031e-08	NA
Q3UMR0	P18-CTX_H2B	2.2768	0.142799	21.9882	1.44351e-13	4.20016e-12	NA
Q3UMR5	P18-CTX_H2B	-0.402283	0.287277	21.761	0.175512	0.211647	NA
Q3UMT1	P18-CTX_H2B	0.289335	0.229823	21.3484	0.221641	0.260766	NA
Q3UN02	P18-CTX_H2B	-0.249886	0.219676	21.8729	0.26763	0.31002	NA
Q3UNH4	P18-CTX_H2B	0.204081	0.15213	22.3484	0.193236	0.230757	NA
Q3UPL0	P18-CTX_H2B	0.971222	0.10303	21.5916	4.16491e-09	2.52696e-08	NA
Q3UR70	P18-CTX_H2B	0.979042	0.47937	19.8743	0.0546104	0.0727601	NA
Q3URD3	P18-CTX_H2B	0.443492	0.149542	21.5314	0.00724835	0.0115106	NA
Q3USB7	P18-CTX_H2B	1.063	0.1728	22.3484	3.20022e-06	1.00345e-05	NA
Q3UTJ2	P18-CTX_H2B	0.294151	0.129499	21.49	0.0335034	0.0464447	NA
Q3UTQ8	P18-CTX_H2B	-1.35546	0.218641	21.4959	3.39988e-06	1.06359e-05	NA
Q3UTZ3	P18-CTX_H2B	0.935248	0.167226	22.0122	1.26828e-05	3.47364e-05	NA
Q3UU96	P18-CTX_H2B	1.29025	0.110719	21.8493	7.59568e-11	7.26287e-10	NA
Q3UUF8	P18-CTX_H2B	0.874797	0.243113	10.3484	0.00460367	0.00760997	NA
Q3UUG6	P18-CTX_H2B	0.32075	0.136307	21.4974	0.0281984	0.0398043	NA
Q3UV17	P18-CTX_H2B	-1.27346	0.562084	22.3484	0.0334966	0.0464447	NA
Q3UVC0	P18-CTX_H2B	1.07934	0.125746	21.5152	2.15291e-08	1.07288e-07	NA
Q3UVK0	P18-CTX_H2B	-0.150474	0.305393	20.9889	0.627323	0.666746	NA
Q3UVL4	P18-CTX_H2B	1.83608	0.219569	22.3484	2.48693e-08	1.22804e-07	NA
Q3UVR3	P18-CTX_H2B	2.17567	0.28291	22.3484	1.01686e-07	4.4026e-07	NA
Q3UVX5	P18-CTX_H2B	0.757258	0.14797	21.9908	3.96892e-05	9.90767e-05	NA
Q3UYC0	P18-CTX_H2B	1.12047	0.160969	21.5949	6.08031e-07	2.21743e-06	NA
Q3UYG8	P18-CTX_H2B	0.510563	0.272366	19.421	0.075977	0.0984644	NA
Q3UYH7	P18-CTX_H2B	0.987371	0.17438	11.3484	0.000129947	0.000292211	NA
Q3V038	P18-CTX_H2B	1.06846	0.177516	22.3484	4.36784e-06	1.32653e-05	NA
Q3V0G7	P18-CTX_H2B	1.28969	0.138061	22.3484	3.55223e-09	2.17966e-08	NA
Q3V1U8	P18-CTX_H2B	0.0252903	0.207343	21.5646	0.90405	0.914868	NA
Q3V3Q7	P18-CTX_H2B	0.732511	0.379094	13.4601	0.0746501	0.0969304	NA
Q3V3V9	P18-CTX_H2B	0.132057	0.136504	21.4308	0.344123	0.387689	NA
Q3ZT31	P18-CTX_H2B	0.31681	0.197172	22.3484	0.122144	0.152736	NA
Q4ACU6	P18-CTX_H2B	0.298999	0.274225	21.4802	0.287642	0.330513	NA
Q4JIM5	P18-CTX_H2B	1.01768	0.15265	22.3484	9.7527e-07	3.36618e-06	NA
Q4KMM3	P18-CTX_H2B	1.76266	0.19948	21.4634	1.34323e-08	7.07156e-08	NA
Q4KUS2	P18-CTX_H2B	3.20441	0.228617	22.3484	1.48653e-12	2.69971e-11	NA
Q4U2R1	P18-CTX_H2B	1.69966	0.211245	22.3484	4.78968e-08	2.21933e-07	NA
Q4VA53	P18-CTX_H2B	-1.50699	0.285005	22.3484	2.50684e-05	6.51634e-05	NA
Q4VAA2	P18-CTX_H2B	3.55711	0.263967	21.8284	4.67745e-12	6.8789e-11	NA
Q4VAE3	P18-CTX_H2B	-1.72779	0.203524	21.4387	2.66574e-08	1.30207e-07	NA
Q4VC33	P18-CTX_H2B	0.20766	0.250309	11.3484	0.423864	0.46892	NA
Q501J6	P18-CTX_H2B	-4.55811	0.179271	21.459	1.64861e-17	1.11528e-14	NA
Q505D9	P18-CTX_H2B	0.114492	0.34105	16.3574	0.741362	0.770401	NA
Q505F5	P18-CTX_H2B	-0.0593959	0.122996	22.3484	0.633858	0.672635	NA
Q50L42	P18-CTX_H2B	0.353847	0.188498	22.3484	0.0736068	0.0957136	NA
Q52KF3	P18-CTX_H2B	0.574076	0.211245	22.3484	0.0124663	0.0188006	NA
Q52KI8	P18-CTX_H2B	-2.22508	0.298966	22.3484	1.73543e-07	7.16957e-07	NA
Q52KR3	P18-CTX_H2B	1.05283	0.214924	20.4387	8.18872e-05	0.000191684	NA
Q569Z5	P18-CTX_H2B	-3.07718	0.261432	20.6204	1.30621e-10	1.1901e-09	NA
Q571K4	P18-CTX_H2B	2.39742	0.334921	22.3484	3.23781e-07	1.26612e-06	NA
Q58A65	P18-CTX_H2B	0.063423	0.160112	21.6698	0.695892	0.730444	NA
Q59J78	P18-CTX_H2B	-0.884675	0.270217	10.3484	0.0080119	0.0125755	NA
Q5BLK4	P18-CTX_H2B	-1.01938	0.308566	22.3484	0.00318698	0.00546166	NA
Q5DQR4	P18-CTX_H2B	1.41958	0.224992	19.3934	4.25971e-06	1.29514e-05	NA
Q5DTN8	P18-CTX_H2B	1.92972	0.2405	22.3484	5.0168e-08	2.31268e-07	NA
Q5DTT2	P18-CTX_H2B	-1.55514	0.474993	15.3484	0.00499552	0.0082026	NA
Q5DTX6	P18-CTX_H2B	1.02849	0.314855	21.7274	0.00357173	0.00605963	NA
Q5DTY9	P18-CTX_H2B	0.426909	0.243361	21.4573	0.0936653	0.119443	NA
Q5DU14	P18-CTX_H2B	0.915131	0.356328	22.3484	0.0174098	0.0255205	NA
Q5DU25	P18-CTX_H2B	-0.251007	0.12902	21.3942	0.0649741	0.0853081	NA
Q5F2E8	P18-CTX_H2B	0.83792	0.196237	22.3484	0.000303029	0.000634181	NA
Q5FWK3	P18-CTX_H2B	0.722582	0.147533	21.6482	7.04266e-05	0.000167346	NA
Q5GH67	P18-CTX_H2B	1.07526	0.20952	22.3484	3.65695e-05	9.19675e-05	NA
Q5H8C4	P18-CTX_H2B	1.00939	0.159282	21.5146	2.47865e-06	7.96514e-06	NA
Q5HZI2	P18-CTX_H2B	0.160873	0.247376	22.3484	0.522117	0.56254	NA
Q5HZI9	P18-CTX_H2B	-0.174832	0.302866	10.3484	0.576108	0.615455	NA
Q5M8N0	P18-CTX_H2B	-0.570656	0.160454	21.4531	0.00181971	0.00327621	NA
Q5PR69	P18-CTX_H2B	1.90632	0.199316	21.608	3.20367e-09	2.00674e-08	NA
Q5PR73	P18-CTX_H2B	-0.277107	0.212693	20.4053	0.207137	0.245594	NA
Q5QNQ6	P18-CTX_H2B	0.714805	0.199723	21.5529	0.00171525	0.00310465	NA
Q5RJG7	P18-CTX_H2B	0.701251	0.241699	22.3484	0.00819587	0.0128345	NA
Q5RJI5	P18-CTX_H2B	0.856888	0.122661	21.6521	5.67218e-07	2.07698e-06	NA
Q5RKR3	P18-CTX_H2B	1.57113	0.232563	21.7271	9.24345e-07	3.20677e-06	NA
Q5SNZ0	P18-CTX_H2B	1.72532	0.148139	21.8481	7.686e-11	7.27214e-10	NA
Q5SP85	P18-CTX_H2B	4.08335	0.286847	22.3484	1.08738e-12	2.11688e-11	NA
Q5SQX6	P18-CTX_H2B	1.1788	0.213069	21.7448	1.52693e-05	4.10723e-05	NA
Q5SRX1	P18-CTX_H2B	2.10011	0.237532	22.3484	9.44814e-09	5.23182e-08	NA
Q5SS80	P18-CTX_H2B	0.562491	0.420265	12.3484	0.204883	0.24327	NA
Q5SSH7	P18-CTX_H2B	1.44344	0.124499	22.3484	6.30101e-11	6.22282e-10	NA
Q5SSL4	P18-CTX_H2B	1.65646	0.107109	21.4832	4.02089e-13	9.54433e-12	NA
Q5SSM3	P18-CTX_H2B	2.04525	0.162982	21.5237	2.26781e-11	2.57844e-10	NA
Q5SUE8	P18-CTX_H2B	1.15412	0.16781	21.4836	7.50628e-07	2.65516e-06	NA
Q5SUR0	P18-CTX_H2B	-1.32899	0.188525	21.7778	4.77751e-07	1.77826e-06	NA
Q5SV85	P18-CTX_H2B	0.916103	0.1106	22.3484	2.92674e-08	1.40421e-07	NA
Q5SVL6	P18-CTX_H2B	1.44366	0.168738	21.5972	2.20615e-08	1.0974e-07	NA
Q5SW19	P18-CTX_H2B	0.425885	0.269758	22.3484	0.12844	0.159431	NA
Q5SW75	P18-CTX_H2B	1.42016	0.171394	22.3484	2.90906e-08	1.39821e-07	NA
Q5SWP3	P18-CTX_H2B	-1.51253	0.203336	21.9963	1.93498e-07	7.94545e-07	NA
Q5SXA9	P18-CTX_H2B	1.4557	0.141241	22.3484	5.87436e-10	4.54172e-09	NA
Q5SXY1	P18-CTX_H2B	-0.0924549	0.226937	20.9118	0.687852	0.722845	NA
Q5SYD0	P18-CTX_H2B	1.45758	0.272126	15.4146	7.29418e-05	0.000172686	NA
Q5U3K5	P18-CTX_H2B	-0.539841	0.170154	21.5212	0.00448965	0.00744423	NA
Q5U430	P18-CTX_H2B	1.04453	0.231436	22.3484	0.000166483	0.000366561	NA
Q5U458	P18-CTX_H2B	-0.159305	0.122351	21.4205	0.206732	0.245251	NA
Q5XG69	P18-CTX_H2B	-4.06382	0.260208	18.4748	4.28798e-12	6.51869e-11	NA
Q5XG73	P18-CTX_H2B	-0.102944	0.265011	22.3484	0.701357	0.734755	NA
Q5XJV6	P18-CTX_H2B	-0.462076	0.378556	11.3484	0.246984	0.287333	NA
Q5XJY5	P18-CTX_H2B	-0.439914	0.207187	22.3484	0.0450351	0.061362	NA
Q5XPI3	P18-CTX_H2B	0.591241	0.117548	21.8112	5.02175e-05	0.000123423	NA
Q60575	P18-CTX_H2B	2.17844	0.167861	22.3484	6.93572e-12	9.38403e-11	NA
Q60597	P18-CTX_H2B	-0.980968	0.134187	21.4122	3.0072e-07	1.18622e-06	NA
Q60598	P18-CTX_H2B	2.45817	0.137533	22.3484	9.99435e-15	4.91722e-13	NA
Q60605	P18-CTX_H2B	1.38966	0.21445	22.3484	1.4944e-06	4.99239e-06	NA
Q60610	P18-CTX_H2B	0.732105	0.263988	22.3484	0.0109894	0.0168484	NA
Q60625	P18-CTX_H2B	-0.947637	0.162219	19.3597	1.1681e-05	3.24524e-05	NA
Q60631	P18-CTX_H2B	0.309054	0.132558	21.952	0.0293099	0.0412013	NA
Q60634	P18-CTX_H2B	0.0489141	0.16987	21.5953	0.77613	0.802525	NA
Q60668	P18-CTX_H2B	-4.14861	0.203868	21.4902	1.58012e-15	1.42527e-13	NA
Q60673	P18-CTX_H2B	0.824497	0.290637	21.3484	0.00977573	0.0151334	NA
Q60676	P18-CTX_H2B	1.03914	0.116764	21.4446	1.19843e-08	6.40372e-08	NA
Q60692	P18-CTX_H2B	-0.94247	0.177632	22.3484	2.399e-05	6.27823e-05	NA
Q60737	P18-CTX_H2B	-0.499938	0.22035	22.3484	0.0332695	0.0461915	NA
Q60738	P18-CTX_H2B	0.357693	0.213672	10.3484	0.12404	0.154536	NA
Q60749	P18-CTX_H2B	-3.44751	0.180547	21.6251	5.06621e-15	3.3773e-13	NA
Q60760	P18-CTX_H2B	1.2775	0.193959	22.3484	1.17124e-06	4.00174e-06	NA
Q60769	P18-CTX_H2B	1.50674	0.422775	16.6708	0.00245106	0.00430686	NA
Q60771	P18-CTX_H2B	3.29755	0.670579	18.3484	0.000105282	0.000240619	NA
Q60780	P18-CTX_H2B	0.243175	0.249975	22.3484	0.341067	0.384714	NA
Q60803	P18-CTX_H2B	0.525824	0.156472	21.6433	0.00287136	0.00496163	NA
Q60829	P18-CTX_H2B	4.89025	0.475988	21.1471	1.11926e-09	7.90787e-09	NA
Q60854	P18-CTX_H2B	1.218	0.239678	22.3484	4.13277e-05	0.000103072	NA
Q60864	P18-CTX_H2B	1.38301	0.11654	21.8905	5.24893e-11	5.3197e-10	NA
Q60865	P18-CTX_H2B	0.281918	0.139246	22.3484	0.0550186	0.0732678	NA
Q60870	P18-CTX_H2B	-0.207865	0.243404	21.7371	0.402424	0.447211	NA
Q60875	P18-CTX_H2B	-0.280881	0.137912	21.4231	0.0542303	0.0723261	NA
Q60900	P18-CTX_H2B	-1.88097	0.264539	22.3484	3.59949e-07	1.3875e-06	NA
Q60902	P18-CTX_H2B	1.54632	0.207194	22.3484	1.65953e-07	6.88756e-07	NA
Q60930	P18-CTX_H2B	0.0298315	0.19773	21.4575	0.881488	0.896394	NA
Q60931	P18-CTX_H2B	0.0720473	0.350787	21.7375	0.839181	0.85821	NA
Q60932	P18-CTX_H2B	-0.564416	0.186269	21.4557	0.00626526	0.0100795	NA
Q60996	P18-CTX_H2B	1.6042	0.355787	12.3484	0.000666711	0.00130828	NA
Q61016	P18-CTX_H2B	3.55315	0.340309	22.3484	4.61217e-10	3.64928e-09	NA
Q61024	P18-CTX_H2B	-0.459985	0.17687	22.3484	0.0161999	0.0239024	NA
Q61029	P18-CTX_H2B	-1.53476	0.200881	22.3484	1.13242e-07	4.83332e-07	NA
Q61035	P18-CTX_H2B	-0.420848	0.156662	22.3484	0.0133757	0.0200636	NA
Q61036	P18-CTX_H2B	1.34758	0.231998	20.4136	1.02016e-05	2.86261e-05	NA
Q61037	P18-CTX_H2B	2.15843	0.131624	22.3484	6.00811e-14	1.95879e-12	NA
Q61062	P18-CTX_H2B	0.0248955	0.221683	14.4016	0.912134	0.920983	NA
Q61081	P18-CTX_H2B	1.55705	0.196179	22.3484	6.02293e-08	2.72494e-07	NA
Q61097	P18-CTX_H2B	0.538394	0.198142	20.3862	0.0131239	0.0197297	NA
Q61120	P18-CTX_H2B	1.06483	0.11607	22.3484	4.91187e-09	2.90843e-08	NA
Q61136	P18-CTX_H2B	-1.72274	0.137204	21.4778	2.30989e-11	2.60441e-10	NA
Q61140	P18-CTX_H2B	3.05063	0.212121	22.3484	8.84115e-13	1.78538e-11	NA
Q61151	P18-CTX_H2B	0.85984	0.200524	21.3484	0.000316189	0.000657148	NA
Q61165	P18-CTX_H2B	1.2177	0.323946	21.7228	0.00110242	0.00207162	NA
Q61166	P18-CTX_H2B	0.686385	0.167359	22.3484	0.000458833	0.000925878	NA
Q61171	P18-CTX_H2B	0.0535901	0.155109	22.0043	0.732999	0.762883	NA
Q61187	P18-CTX_H2B	2.91722	0.144117	22.3484	7.2331e-16	8.89671e-14	NA
Q61189	P18-CTX_H2B	0.897568	0.264908	21.3484	0.00272692	0.00473927	NA
Q61191	P18-CTX_H2B	-1.68954	0.17383	21.587	2.43237e-09	1.56714e-08	NA
Q61205	P18-CTX_H2B	-0.317743	0.263933	22.3484	0.241233	0.281612	NA
Q61234	P18-CTX_H2B	-0.550135	0.20787	21.5216	0.0149036	0.0220982	NA
Q61249	P18-CTX_H2B	0.734143	0.143249	22.3484	3.72058e-05	9.33941e-05	NA
Q61285	P18-CTX_H2B	-0.93443	0.278182	10.3484	0.0069217	0.0110437	NA
Q61290	P18-CTX_H2B	0.381431	0.126759	21.4697	0.00657271	0.0105366	NA
Q61301	P18-CTX_H2B	1.12509	0.151736	22.3484	1.84357e-07	7.59316e-07	NA
Q61315	P18-CTX_H2B	2.4131	0.14679	21.784	9.22222e-14	2.80397e-12	NA
Q61316	P18-CTX_H2B	0.752564	0.0983152	21.4354	1.44786e-07	6.07429e-07	NA
Q61335	P18-CTX_H2B	-0.377995	0.13915	21.483	0.0127676	0.0192367	NA
Q61361	P18-CTX_H2B	-0.950724	0.323862	21.5233	0.00776767	0.012249	NA
Q61411	P18-CTX_H2B	0.300953	0.1467	21.4354	0.0526379	0.0706189	NA
Q61423	P18-CTX_H2B	2.38896	0.221476	10.3484	5.89457e-07	2.15259e-06	NA
Q61464	P18-CTX_H2B	-2.63295	0.220374	21.5849	5.53798e-11	5.59171e-10	NA
Q61481	P18-CTX_H2B	1.237	0.220226	21.5136	1.3002e-05	3.55028e-05	NA
Q61490	P18-CTX_H2B	0.411806	0.172691	21.5676	0.0263374	0.0374312	NA
Q61543	P18-CTX_H2B	-1.51299	0.214652	22.3484	4.12938e-07	1.5672e-06	NA
Q61545	P18-CTX_H2B	-3.90243	0.182162	21.449	5.75654e-16	7.78859e-14	NA
Q61548	P18-CTX_H2B	1.02478	0.213108	21.7682	8.60665e-05	0.000199739	NA
Q61553	P18-CTX_H2B	0.35165	0.102921	21.4339	0.00253881	0.004438	NA
Q61584	P18-CTX_H2B	-1.68683	0.163266	21.5417	8.32022e-10	6.13474e-09	NA
Q61595	P18-CTX_H2B	-1.22398	0.173173	21.684	4.70255e-07	1.75277e-06	NA
Q61598	P18-CTX_H2B	1.08419	0.0991957	22.3484	1.94814e-10	1.68964e-09	NA
Q61599	P18-CTX_H2B	0.680696	0.242151	21.3484	0.0103627	0.0159599	NA
Q61644	P18-CTX_H2B	3.26148	0.318919	21.6891	9.31452e-10	6.72136e-09	NA
Q61655	P18-CTX_H2B	0.366075	0.277808	22.3484	0.200944	0.239013	NA
Q61656	P18-CTX_H2B	-4.20217	0.173004	21.4816	4.14567e-17	1.6026e-14	NA
Q61696	P18-CTX_H2B	2.27672	0.25055	22.3484	5.82172e-09	3.38786e-08	NA
Q61699	P18-CTX_H2B	1.49789	0.127326	22.3484	4.75425e-11	4.8777e-10	NA
Q61735	P18-CTX_H2B	0.0334538	0.154239	21.4446	0.83034	0.850776	NA
Q61753	P18-CTX_H2B	-0.625073	0.161029	21.8742	0.000811174	0.00156342	NA
Q61768	P18-CTX_H2B	1.63304	0.111171	21.8928	8.11011e-13	1.66257e-11	NA
Q61771	P18-CTX_H2B	-0.366043	0.136231	22.3484	0.013358	0.0200481	NA
Q61792	P18-CTX_H2B	2.66998	0.138375	22.3484	1.99591e-15	1.74224e-13	NA
Q61879	P18-CTX_H2B	0.888891	0.104825	21.6434	2.52038e-08	1.24228e-07	NA
Q61885	P18-CTX_H2B	1.39298	0.530519	19.4833	0.0164242	0.0242069	NA
Q61937	P18-CTX_H2B	-2.06184	0.197889	22.3484	4.79573e-10	3.77245e-09	NA
Q61990	P18-CTX_H2B	-1.497	0.155217	21.7206	2.62854e-09	1.68551e-08	NA
Q62036	P18-CTX_H2B	-0.243077	0.237962	10.3484	0.330307	0.373823	NA
Q62048	P18-CTX_H2B	1.83645	0.224371	22.3484	3.58545e-08	1.70215e-07	NA
Q62077	P18-CTX_H2B	2.04251	0.122799	21.9666	6.21241e-14	2.00128e-12	NA
Q62083	P18-CTX_H2B	3.76655	0.185538	21.9161	1.06406e-15	1.19973e-13	NA
Q62095	P18-CTX_H2B	-0.837484	0.291566	21.3484	0.00902025	0.0140523	NA
Q62108	P18-CTX_H2B	0.634962	0.169372	21.4816	0.00114656	0.00214119	NA
Q62167	P18-CTX_H2B	-1.59858	0.394547	15.3484	0.000999867	0.00188941	NA
Q62188	P18-CTX_H2B	1.97122	0.135952	21.5096	1.40265e-12	2.58203e-11	NA
Q62189	P18-CTX_H2B	-1.81535	0.165554	21.7359	2.53193e-10	2.13439e-09	NA
Q62203	P18-CTX_H2B	-0.990547	0.202092	22.3484	6.41965e-05	0.000154003	NA
Q62245	P18-CTX_H2B	1.22061	0.315198	19.5107	0.000984144	0.00186491	NA
Q62261	P18-CTX_H2B	2.09179	0.121755	21.8271	3.62636e-14	1.37982e-12	NA
Q62277	P18-CTX_H2B	2.22296	0.225982	21.5199	2.02655e-09	1.33753e-08	NA
Q62283	P18-CTX_H2B	-0.777371	0.230283	21.5733	0.00277884	0.004821	NA
Q62318	P18-CTX_H2B	-4.94411	0.26103	21.5359	6.528e-15	3.60506e-13	NA
Q62348	P18-CTX_H2B	-0.490579	0.178199	22.3484	0.0115066	0.0175149	NA
Q62376	P18-CTX_H2B	-2.45484	0.19102	21.7558	1.23618e-11	1.52745e-10	NA
Q62393	P18-CTX_H2B	1.52771	0.34223	18.3076	0.000288809	0.000606297	NA
Q62407	P18-CTX_H2B	0.633701	0.21689	21.6152	0.00799403	0.0125755	NA
Q62415	P18-CTX_H2B	2.01584	0.273927	22.3484	2.08201e-07	8.4848e-07	NA
Q62417	P18-CTX_H2B	0.823919	0.113821	21.5601	3.36186e-07	1.3051e-06	NA
Q62418	P18-CTX_H2B	1.33298	0.141911	22.3484	3.21707e-09	2.01049e-08	NA
Q62419	P18-CTX_H2B	0.571179	0.14386	21.79	0.000658025	0.00129217	NA
Q62420	P18-CTX_H2B	1.11132	0.202805	21.5722	1.7776e-05	4.73444e-05	NA
Q62421	P18-CTX_H2B	-0.268628	0.291023	20.7646	0.366584	0.410077	NA
Q62425	P18-CTX_H2B	-0.34148	0.166806	21.435	0.0530951	0.0711264	NA
Q62426	P18-CTX_H2B	2.04109	0.433541	22.3484	0.000103168	0.000236186	NA
Q62432	P18-CTX_H2B	-0.129767	0.288703	19.3484	0.658077	0.695337	NA
Q62433	P18-CTX_H2B	0.267704	0.270275	10.3484	0.34453	0.387811	NA
Q62442	P18-CTX_H2B	-1.12321	0.219378	19.4052	5.71226e-05	0.00013888	NA
Q62446	P18-CTX_H2B	-1.46117	0.274045	22.3484	2.25198e-05	5.91637e-05	NA
Q62448	P18-CTX_H2B	-0.577687	0.168651	22.3484	0.00238116	0.00419494	NA
Q62465	P18-CTX_H2B	0.234282	0.211186	22.3484	0.279068	0.321892	NA
Q62523	P18-CTX_H2B	1.36147	0.224895	22.3484	4.02432e-06	1.23328e-05	NA
Q63810	P18-CTX_H2B	0.655763	0.350397	21.9143	0.0746874	0.0969325	NA
Q63844	P18-CTX_H2B	0.79462	0.139655	22.0191	1.00624e-05	2.82749e-05	NA
Q64010	P18-CTX_H2B	1.1782	0.210979	22.3484	1.22586e-05	3.37119e-05	NA
Q64012	P18-CTX_H2B	-1.76514	0.266246	22.3484	1.06102e-06	3.64354e-06	NA
Q64096	P18-CTX_H2B	1.61215	0.166163	22.3484	1.78885e-09	1.18934e-08	NA
Q640R3	P18-CTX_H2B	-0.197718	0.187141	20.3484	0.303114	0.346379	NA
Q64105	P18-CTX_H2B	1.51161	0.150557	22.3484	9.54564e-10	6.86982e-09	NA
Q64133	P18-CTX_H2B	-0.359789	0.192212	21.5173	0.0748867	0.0971445	NA
Q64152	P18-CTX_H2B	-1.89971	0.37107	18.6279	6.46564e-05	0.000154969	NA
Q641K1	P18-CTX_H2B	1.05118	0.130301	22.3484	4.57944e-08	2.13654e-07	NA
Q641P0	P18-CTX_H2B	-0.0528224	0.328259	21.6033	0.873654	0.889766	NA
Q64213	P18-CTX_H2B	-2.98529	0.20587	21.6113	1.29635e-12	2.41927e-11	NA
Q64331	P18-CTX_H2B	-0.734203	0.340898	20.3484	0.0434207	0.0593716	NA
Q64332	P18-CTX_H2B	2.16106	0.304634	21.6743	4.45528e-07	1.6675e-06	NA
Q64337	P18-CTX_H2B	-0.40689	0.222567	22.3484	0.0809057	0.104203	NA
Q64433	P18-CTX_H2B	1.03831	0.383646	22.3484	0.0127841	0.0192509	NA
Q64455	P18-CTX_H2B	0.965782	0.373347	14.4924	0.0210674	0.0304532	NA
Q64487	P18-CTX_H2B	0.269866	0.172239	20.4654	0.132491	0.164234	NA
Q64511	P18-CTX_H2B	-3.67693	0.226226	21.692	1.25441e-13	3.73013e-12	NA
Q64514	P18-CTX_H2B	0.464194	0.0983354	21.4599	0.000110292	0.000250799	NA
Q64516	P18-CTX_H2B	-0.280938	0.305805	21.5697	0.368422	0.411962	NA
Q64520	P18-CTX_H2B	-0.103972	0.379837	21.3484	0.786925	0.811826	NA
Q64521	P18-CTX_H2B	-0.995505	0.160435	21.4087	3.41824e-06	1.0681e-05	NA
Q64674	P18-CTX_H2B	0.990002	0.224308	22.3484	0.000212779	0.000456245	NA
Q64727	P18-CTX_H2B	-0.369115	0.189039	21.8687	0.0637862	0.083952	NA
Q64737	P18-CTX_H2B	1.02502	0.317744	22.3484	0.00383371	0.00645953	NA
Q66JS6	P18-CTX_H2B	1.24817	0.236948	22.3484	2.6305e-05	6.81161e-05	NA
Q68ED2	P18-CTX_H2B	1.93958	0.193223	22.3484	9.58149e-10	6.87733e-09	NA
Q68ED7	P18-CTX_H2B	1.64333	0.188419	22.3484	1.19981e-08	6.40372e-08	NA
Q68EF6	P18-CTX_H2B	0.737538	0.178239	21.6061	0.000444539	0.000901065	NA
Q68FD5	P18-CTX_H2B	2.34279	0.171069	21.7633	3.56705e-12	5.64471e-11	NA
Q68FE6	P18-CTX_H2B	2.31835	0.154895	21.7787	6.09212e-13	1.35355e-11	NA
Q68FF0	P18-CTX_H2B	2.23834	0.283367	21.3484	8.99127e-08	3.95616e-07	NA
Q68FF6	P18-CTX_H2B	1.68908	0.1149	22.0156	7.28076e-13	1.52727e-11	NA
Q68FH0	P18-CTX_H2B	0.93652	0.130494	21.6643	3.73344e-07	1.43504e-06	NA
Q68FL6	P18-CTX_H2B	-0.96353	0.177326	21.7157	1.93822e-05	5.13694e-05	NA
Q68FM6	P18-CTX_H2B	0.0619508	0.230164	11.3484	0.792638	0.816682	NA
Q69Z38	P18-CTX_H2B	0.90689	0.231533	21.3484	0.000772726	0.00149464	NA
Q69Z98	P18-CTX_H2B	1.02449	0.143886	21.614	4.27736e-07	1.61205e-06	NA
Q69Z99	P18-CTX_H2B	-3.18478	0.269238	22.3484	4.27474e-11	4.50095e-10	NA
Q69ZF3	P18-CTX_H2B	2.07253	0.191189	22.3484	2.2768e-10	1.94354e-09	NA
Q69ZH9	P18-CTX_H2B	2.41825	0.221046	22.3484	1.91369e-10	1.6651e-09	NA
Q69ZI1	P18-CTX_H2B	1.49476	0.25445	22.3484	6.14243e-06	1.81854e-05	NA
Q69ZK0	P18-CTX_H2B	-0.244835	0.21156	21.3484	0.259942	0.30163	NA
Q69ZK9	P18-CTX_H2B	-0.859661	0.263621	20.7481	0.00377723	0.00638825	NA
Q69ZR2	P18-CTX_H2B	1.11264	0.179651	22.3484	2.90315e-06	9.16676e-06	NA
Q69ZS0	P18-CTX_H2B	2.03451	0.165803	22.3484	2.09213e-11	2.39886e-10	NA
Q69ZS6	P18-CTX_H2B	3.03209	0.20139	22.3484	3.48136e-13	8.56414e-12	NA
Q69ZS7	P18-CTX_H2B	1.46461	0.145199	22.3484	8.75935e-10	6.3889e-09	NA
Q69ZS8	P18-CTX_H2B	1.92119	0.178787	22.3484	2.68654e-10	2.25769e-09	NA
Q69ZU6	P18-CTX_H2B	-0.124124	0.128413	21.4738	0.344502	0.387811	NA
Q69ZW3	P18-CTX_H2B	1.45712	0.162866	22.3484	7.6678e-09	4.33175e-08	NA
Q69ZX8	P18-CTX_H2B	1.45221	0.19716	22.3484	2.05214e-07	8.40053e-07	NA
Q69ZZ6	P18-CTX_H2B	0.0680387	0.201865	20.3768	0.739525	0.768788	NA
Q6A065	P18-CTX_H2B	1.24299	0.153178	22.3484	4.14894e-08	1.94239e-07	NA
Q6A0A9	P18-CTX_H2B	-0.965829	0.241513	21.5825	0.000623194	0.00122823	NA
Q6A4J8	P18-CTX_H2B	-0.750923	0.15466	21.4299	8.00809e-05	0.000187944	NA
Q6DFV3	P18-CTX_H2B	2.84556	0.197593	21.849	1.24367e-12	2.3534e-11	NA
Q6DFV7	P18-CTX_H2B	1.05463	0.208605	22.3484	4.40534e-05	0.000109265	NA
Q6DFW4	P18-CTX_H2B	-2.46391	0.288352	22.3483	1.71376e-08	8.74989e-08	NA
Q6DIC0	P18-CTX_H2B	-2.21668	0.322273	10.3484	3.62774e-05	9.14029e-05	NA
Q6EDY6	P18-CTX_H2B	0.159429	0.13298	22.3484	0.243127	0.283456	NA
Q6GQT9	P18-CTX_H2B	-1.35034	0.183618	21.5451	2.63827e-07	1.05142e-06	NA
Q6GYP7	P18-CTX_H2B	1.0355	0.488696	16.6804	0.049423	0.0666362	NA
Q6I6G8	P18-CTX_H2B	2.59394	0.237054	22.3484	1.90594e-10	1.6637e-09	NA
Q6IFX2	P18-CTX_H2B	-1.47531	0.574027	22.3484	0.0173375	0.0254382	NA
Q6IMP4	P18-CTX_H2B	1.24918	0.300851	20.3757	0.000476615	0.000960328	NA
Q6IR34	P18-CTX_H2B	1.51954	0.153737	21.693	1.71795e-09	1.15686e-08	NA
Q6IRU5	P18-CTX_H2B	2.95832	0.420177	22.3484	4.20276e-07	1.59058e-06	NA
Q6KAR6	P18-CTX_H2B	0.748582	0.14513	22.3484	3.43309e-05	8.67408e-05	NA
Q6KAU4	P18-CTX_H2B	0.837338	0.184725	22.3484	0.000158641	0.000350148	NA
Q6NS52	P18-CTX_H2B	1.77438	0.298231	19.3969	9.17659e-06	2.61113e-05	NA
Q6NS60	P18-CTX_H2B	0.871234	0.116716	21.4817	2.12631e-07	8.62637e-07	NA
Q6NS65	P18-CTX_H2B	0.391159	0.288604	10.3484	0.204149	0.242719	NA
Q6NSW3	P18-CTX_H2B	-0.247348	0.211499	22.3484	0.254525	0.295725	NA
Q6NVE8	P18-CTX_H2B	1.68838	0.136519	22.3484	1.7938e-11	2.11044e-10	NA
Q6NXJ0	P18-CTX_H2B	1.10357	0.213932	22.3484	3.42902e-05	8.6719e-05	NA
Q6NXK7	P18-CTX_H2B	-0.223734	0.20227	20.4066	0.281547	0.324475	NA
Q6NXK8	P18-CTX_H2B	-0.263134	0.270573	10.3484	0.352981	0.396335	NA
Q6NZC7	P18-CTX_H2B	-0.811504	0.309102	19.3484	0.0164966	0.0242871	NA
Q6NZJ6	P18-CTX_H2B	-0.206819	0.152242	21.789	0.188207	0.225249	NA
Q6NZL0	P18-CTX_H2B	1.99796	0.116918	22.3484	2.55281e-14	1.04665e-12	NA
Q6NZM9	P18-CTX_H2B	0.95123	0.231564	22.3484	0.000451473	0.000913489	NA
Q6P069	P18-CTX_H2B	1.41702	0.160278	22.3484	9.4544e-09	5.23182e-08	NA
Q6P1B1	P18-CTX_H2B	-0.439973	0.125235	21.4564	0.00201704	0.00360747	NA
Q6P1F6	P18-CTX_H2B	1.26467	0.186628	22.3484	7.60452e-07	2.6864e-06	NA
Q6P1I6	P18-CTX_H2B	0.424935	0.188453	22.3484	0.0342639	0.0474019	NA
Q6P3D0	P18-CTX_H2B	-0.695105	0.222002	10.3484	0.0102531	0.0158181	NA
Q6P4S6	P18-CTX_H2B	1.14698	0.136909	21.4727	3.28436e-08	1.56746e-07	NA
Q6P4T2	P18-CTX_H2B	-3.3482	0.181459	21.4766	1.1768e-14	5.58669e-13	NA
Q6P542	P18-CTX_H2B	-1.24332	0.0950342	21.3886	1.11896e-11	1.42155e-10	NA
Q6P5B0	P18-CTX_H2B	-2.17912	0.328818	22.3484	1.0673e-06	3.65584e-06	NA
Q6P5D3	P18-CTX_H2B	-0.0722691	0.156952	22.3484	0.649639	0.688302	NA
Q6P5D8	P18-CTX_H2B	-3.36453	0.177548	21.4644	6.93577e-15	3.68004e-13	NA
Q6P5E4	P18-CTX_H2B	-1.03254	0.294604	21.9994	0.00200074	0.00358306	NA
Q6P5E8	P18-CTX_H2B	1.4366	0.164134	21.5425	1.5314e-08	7.89327e-08	NA
Q6P5F7	P18-CTX_H2B	0.283745	0.185438	22.0163	0.140226	0.172714	NA
Q6P5F9	P18-CTX_H2B	-0.118686	0.170668	21.6136	0.494201	0.536425	NA
Q6P5U7	P18-CTX_H2B	3.14664	0.159514	21.8388	2.09195e-15	1.76901e-13	NA
Q6P8X1	P18-CTX_H2B	0.390835	0.128975	21.5422	0.00624342	0.0100564	NA
Q6P9K8	P18-CTX_H2B	0.664098	0.134876	21.493	6.74415e-05	0.000161216	NA
Q6P9K9	P18-CTX_H2B	0.159757	0.329926	21.7016	0.63308	0.672337	NA
Q6P9Q6	P18-CTX_H2B	1.6695	0.132289	22.3484	1.20495e-11	1.50258e-10	NA
Q6P9R4	P18-CTX_H2B	0.536674	0.326876	22.3484	0.114625	0.144268	NA
Q6P9S0	P18-CTX_H2B	0.78751	0.258372	10.3484	0.0118412	0.0179509	NA
Q6PA06	P18-CTX_H2B	1.30571	0.250349	22.3484	2.98525e-05	7.59949e-05	NA
Q6PAJ1	P18-CTX_H2B	2.79171	0.15998	22.3484	1.64897e-14	7.43685e-13	NA
Q6PAK3	P18-CTX_H2B	-0.331939	0.233102	21.651	0.168698	0.204432	NA
Q6PAR5	P18-CTX_H2B	1.58707	0.097031	22.3484	6.33697e-14	2.01739e-12	NA
Q6PB44	P18-CTX_H2B	1.39447	0.114428	21.8875	3.16486e-11	3.42564e-10	NA
Q6PB66	P18-CTX_H2B	-0.737647	0.220069	21.6948	0.00292366	0.00503913	NA
Q6PCN3	P18-CTX_H2B	0.536379	0.207993	22.3484	0.0170058	0.0249961	NA
Q6PCP5	P18-CTX_H2B	-0.310169	0.150141	21.6139	0.0510362	0.0686061	NA
Q6PCX7	P18-CTX_H2B	-1.05453	0.224285	10.3484	0.000764837	0.00148044	NA
Q6PD03	P18-CTX_H2B	0.964758	0.177912	21.483	2.0622e-05	5.43362e-05	NA
Q6PD10	P18-CTX_H2B	0.581223	0.16476	22.3484	0.00186064	0.00333879	NA
Q6PD19	P18-CTX_H2B	-0.890524	0.404667	10.3484	0.0515107	0.0692096	NA
Q6PD21	P18-CTX_H2B	0.850622	0.177714	22.3484	8.50891e-05	0.00019764	NA
Q6PD28	P18-CTX_H2B	0.248597	0.16151	22.3484	0.137793	0.170182	NA
Q6PD31	P18-CTX_H2B	0.66055	0.359191	19.3484	0.0813149	0.10468	NA
Q6PDC0	P18-CTX_H2B	1.80983	0.235911	21.3484	1.43565e-07	6.03239e-07	NA
Q6PDG5	P18-CTX_H2B	-3.75368	0.352848	21.3484	5.40823e-10	4.21749e-09	NA
Q6PDH0	P18-CTX_H2B	2.0317	0.215107	21.9477	3.45241e-09	2.13679e-08	NA
Q6PDI5	P18-CTX_H2B	-0.641131	0.173286	21.9245	0.00125608	0.00232646	NA
Q6PDJ6	P18-CTX_H2B	2.01464	0.727311	19.3484	0.0120573	0.0182478	NA
Q6PDL0	P18-CTX_H2B	0.598473	0.214149	22.3484	0.0104667	0.0160925	NA
Q6PDM2	P18-CTX_H2B	-5.85748	0.371657	20.5389	6.08696e-13	1.35355e-11	NA
Q6PDQ2	P18-CTX_H2B	-2.04159	0.310178	22.3484	1.18322e-06	4.02742e-06	NA
Q6PDS0	P18-CTX_H2B	0.111742	0.340961	21.3484	0.74631	0.774871	NA
Q6PDS3	P18-CTX_H2B	0.916402	0.132402	22.3484	5.48648e-07	2.01444e-06	NA
Q6PDY2	P18-CTX_H2B	0.213879	0.185415	22.3484	0.260886	0.302596	NA
Q6PE01	P18-CTX_H2B	-2.07636	0.238156	22.3484	1.20754e-08	6.43229e-08	NA
Q6PE13	P18-CTX_H2B	0.653844	0.355701	19.3484	0.0814396	0.104691	NA
Q6PEB6	P18-CTX_H2B	-0.834235	0.341925	14.3484	0.0282289	0.0398266	NA
Q6PER3	P18-CTX_H2B	1.68557	0.190396	21.621	1.22255e-08	6.47403e-08	NA
Q6PEV3	P18-CTX_H2B	-0.962967	0.233605	11.3484	0.00158793	0.00288966	NA
Q6PFD5	P18-CTX_H2B	0.0677352	0.188572	21.4451	0.722958	0.754173	NA
Q6PFD9	P18-CTX_H2B	-2.56972	0.2058	10.3484	1.43226e-07	6.03239e-07	NA
Q6PFE7	P18-CTX_H2B	-0.368339	0.228569	21.3484	0.121758	0.152325	NA
Q6PFX7	P18-CTX_H2B	0.739921	0.259794	10.3484	0.0167615	0.0246503	NA
Q6PGC1	P18-CTX_H2B	0.153753	0.201029	22.3484	0.452373	0.495997	NA
Q6PGF7	P18-CTX_H2B	0.960466	0.160262	22.3484	4.64147e-06	1.40333e-05	NA
Q6PGN3	P18-CTX_H2B	0.188215	0.137182	22.3484	0.183679	0.220318	NA
Q6PH08	P18-CTX_H2B	2.48675	0.202118	22.3484	1.98554e-11	2.28633e-10	NA
Q6PHN9	P18-CTX_H2B	-0.0322859	0.136056	21.6017	0.814661	0.836612	NA
Q6PHZ2	P18-CTX_H2B	1.78928	0.263087	21.8232	8.16397e-07	2.86533e-06	NA
Q6PIC6	P18-CTX_H2B	0.319359	0.142597	21.4017	0.0358527	0.0493727	NA
Q6PIE5	P18-CTX_H2B	-1.06107	0.232181	21.4396	0.0001588	0.000350214	NA
Q6PIP5	P18-CTX_H2B	-0.405318	0.153172	21.667	0.0148656	0.0220539	NA
Q6PNC0	P18-CTX_H2B	1.94031	0.139769	21.9905	2.32424e-12	3.90645e-11	NA
Q6Q477	P18-CTX_H2B	-1.07883	0.260027	21.48	0.0004373	0.000889056	NA
Q6R0H7	P18-CTX_H2B	-0.787293	0.142463	21.8268	1.52944e-05	4.10989e-05	NA
Q6R891	P18-CTX_H2B	-0.177315	0.124759	21.4633	0.169607	0.205349	NA
Q6RHR9	P18-CTX_H2B	1.26866	0.106677	21.9857	4.76504e-11	4.8777e-10	NA
Q6URW6	P18-CTX_H2B	-0.212462	0.240748	10.3484	0.397539	0.442327	NA
Q6V4S5	P18-CTX_H2B	1.38435	0.278231	22.3484	5.35605e-05	0.000130807	NA
Q6VNB8	P18-CTX_H2B	2.14476	0.115716	22.3484	4.66079e-15	3.23387e-13	NA
Q6W8Q3	P18-CTX_H2B	2.53255	0.702167	19.3484	0.00183596	0.00330326	NA
Q6WVG3	P18-CTX_H2B	0.883618	0.243182	22.3484	0.00143985	0.00263436	NA
Q6X893	P18-CTX_H2B	0.676035	0.258884	18.3484	0.0174885	0.0256081	NA
Q6Y685	P18-CTX_H2B	1.27925	0.351106	21.9589	0.00143631	0.00262967	NA
Q6Y7W8	P18-CTX_H2B	-0.855912	0.217569	22.3484	0.000691763	0.00135254	NA
Q6ZPE2	P18-CTX_H2B	1.1424	0.104539	21.4227	3.18862e-10	2.61747e-09	NA
Q6ZPF3	P18-CTX_H2B	0.566668	0.23114	21.9292	0.0226573	0.0325773	NA
Q6ZPJ0	P18-CTX_H2B	2.07345	0.179842	22.3484	7.01853e-11	6.80722e-10	NA
Q6ZPJ3	P18-CTX_H2B	1.56976	0.144852	22.3484	2.2894e-10	1.94815e-09	NA
Q6ZPQ6	P18-CTX_H2B	0.21886	0.135443	21.4609	0.120726	0.151243	NA
Q6ZPU9	P18-CTX_H2B	0.786882	0.168367	22.3484	0.000112243	0.000255021	NA
Q6ZPZ3	P18-CTX_H2B	-3.56667	0.2708	21.9078	6.93354e-12	9.38403e-11	NA
Q6ZQ08	P18-CTX_H2B	0.0785039	0.125864	21.772	0.539292	0.579557	NA
Q6ZQ18	P18-CTX_H2B	1.62945	0.198301	21.7906	4.05523e-08	1.90843e-07	NA
Q6ZQ29	P18-CTX_H2B	-0.313524	0.25521	22.3484	0.232043	0.272175	NA
Q6ZQ38	P18-CTX_H2B	0.508526	0.184234	21.7029	0.0115083	0.0175149	NA
Q6ZQ58	P18-CTX_H2B	0.723943	0.157574	22.001	0.000141285	0.000315442	NA
Q6ZQ82	P18-CTX_H2B	0.422007	0.24231	21.7981	0.0956744	0.121776	NA
Q6ZQI3	P18-CTX_H2B	-0.79611	0.206335	21.7293	0.000866859	0.00166363	NA
Q6ZQK5	P18-CTX_H2B	0.951287	0.437021	17.4476	0.0434995	0.0594494	NA
Q6ZWN5	P18-CTX_H2B	-1.44209	0.24467	21.9951	6.24829e-06	1.84382e-05	NA
Q6ZWR6	P18-CTX_H2B	0.497124	0.17955	21.6084	0.0113183	0.0173036	NA
Q6ZWV3	P18-CTX_H2B	-1.71919	0.187928	22.3484	5.16575e-09	3.05208e-08	NA
Q6ZWV7	P18-CTX_H2B	-2.1106	0.30419	22.3484	5.28095e-07	1.94161e-06	NA
Q6ZWX6	P18-CTX_H2B	-0.0284787	0.25009	22.3484	0.910354	0.919529	NA
Q71LX4	P18-CTX_H2B	1.17131	0.131271	21.5345	1.10554e-08	5.99517e-08	NA
Q71M36	P18-CTX_H2B	-0.752877	0.20981	21.7382	0.00166014	0.00301096	NA
Q76LS9	P18-CTX_H2B	1.19367	0.249745	22.3484	8.65382e-05	0.000200662	NA
Q76MZ3	P18-CTX_H2B	0.956504	0.189702	22.3484	4.55251e-05	0.000112606	NA
Q78IK4	P18-CTX_H2B	-0.00312108	0.179954	21.8295	0.98632	0.988146	NA
Q78JE5	P18-CTX_H2B	-1.78366	0.181474	21.5344	2.04281e-09	1.34497e-08	NA
Q78JW9	P18-CTX_H2B	1.73499	0.191737	22.3484	6.27286e-09	3.63477e-08	NA
Q78PY7	P18-CTX_H2B	-0.783423	0.127331	21.7869	3.56669e-06	1.10809e-05	NA
Q78ZA7	P18-CTX_H2B	0.0383961	0.192759	22.3484	0.843913	0.862398	NA
Q791T5	P18-CTX_H2B	-0.463892	0.152287	21.5536	0.00601639	0.00971381	NA
Q791V5	P18-CTX_H2B	-0.373458	0.256778	21.6325	0.160192	0.19491	NA
Q7M6Y3	P18-CTX_H2B	0.880785	0.227569	22.3484	0.000808272	0.00156005	NA
Q7SIG6	P18-CTX_H2B	1.57559	0.175317	21.9694	8.21847e-09	4.62353e-08	NA
Q7TMB8	P18-CTX_H2B	-0.765499	0.565896	19.3484	0.191743	0.229194	NA
Q7TME0	P18-CTX_H2B	-0.327629	0.168167	21.5545	0.0645253	0.0848019	NA
Q7TMF3	P18-CTX_H2B	-0.67159	0.181795	21.468	0.00130832	0.00241824	NA
Q7TMK9	P18-CTX_H2B	-2.19577	0.126173	21.4454	3.94464e-14	1.42323e-12	NA
Q7TMM9	P18-CTX_H2B	0.428172	0.218616	21.7117	0.0631347	0.0831755	NA
Q7TMQ7	P18-CTX_H2B	1.00727	0.346355	11.5804	0.0135629	0.0202994	NA
Q7TMS5	P18-CTX_H2B	0.241477	0.294132	11.3484	0.428566	0.473347	NA
Q7TMY8	P18-CTX_H2B	0.00415133	0.118092	21.4972	0.972282	0.97625	NA
Q7TN29	P18-CTX_H2B	0.680627	0.107529	21.4894	2.53435e-06	8.11591e-06	NA
Q7TN79	P18-CTX_H2B	-0.5306	0.21056	21.8531	0.0195542	0.0283415	NA
Q7TNC4	P18-CTX_H2B	-2.67068	0.140219	21.4252	6.504e-15	3.60506e-13	NA
Q7TNF0	P18-CTX_H2B	1.21968	0.262857	22.3484	0.000121877	0.000275522	NA
Q7TNG5	P18-CTX_H2B	0.384888	0.158204	22.3484	0.023423	0.0335003	NA
Q7TNM2	P18-CTX_H2B	-0.890354	0.156822	21.5999	1.11214e-05	3.10572e-05	NA
Q7TNR6	P18-CTX_H2B	-0.975071	0.290998	21.9069	0.00290342	0.00501061	NA
Q7TNV0	P18-CTX_H2B	-0.982331	0.297998	10.3484	0.00770767	0.0121757	NA
Q7TPB0	P18-CTX_H2B	1.52233	0.214371	21.6212	4.44665e-07	1.66702e-06	NA
Q7TPD3	P18-CTX_H2B	3.99307	0.233962	21.9492	3.72399e-14	1.38043e-12	NA
Q7TPH6	P18-CTX_H2B	0.771127	0.124094	22.3484	2.76604e-06	8.7791e-06	NA
Q7TPM6	P18-CTX_H2B	1.38909	0.123071	22.3484	1.05561e-10	9.95292e-10	NA
Q7TPR4	P18-CTX_H2B	0.494144	0.180258	21.5749	0.0120478	0.0182436	NA
Q7TPS5	P18-CTX_H2B	0.620273	0.122774	21.5129	4.94768e-05	0.000121713	NA
Q7TPV4	P18-CTX_H2B	-1.27098	0.349493	20.3484	0.00160638	0.00291737	NA
Q7TQ95	P18-CTX_H2B	-0.536494	0.129711	21.4638	0.000451681	0.000913489	NA
Q7TQD2	P18-CTX_H2B	0.623467	0.299048	21.5127	0.0491753	0.0663682	NA
Q7TQF7	P18-CTX_H2B	0.729921	0.242916	21.6391	0.00659991	0.0105677	NA
Q7TQG1	P18-CTX_H2B	-1.12763	0.279627	11.3484	0.00185456	0.0033323	NA
Q7TQH0	P18-CTX_H2B	-0.771851	0.136687	21.6292	1.18888e-05	3.28948e-05	NA
Q7TQI3	P18-CTX_H2B	1.06255	0.233203	22.0126	0.000154825	0.000342845	NA
Q7TSC1	P18-CTX_H2B	-0.690026	0.141101	21.4617	7.33562e-05	0.000173394	NA
Q7TSG2	P18-CTX_H2B	-1.54148	0.200059	21.9306	1.11833e-07	4.7883e-07	NA
Q7TSJ2	P18-CTX_H2B	0.418933	0.218641	21.5381	0.0687231	0.0897946	NA
Q7TSS2	P18-CTX_H2B	1.46415	0.215419	22.3484	7.26254e-07	2.57568e-06	NA
Q7TSY6	P18-CTX_H2B	-1.65668	0.260984	21.6603	2.34476e-06	7.56248e-06	NA
Q7TT50	P18-CTX_H2B	1.43408	0.108423	22.3484	4.7532e-12	6.91515e-11	NA
Q80SW1	P18-CTX_H2B	-0.531361	0.252587	21.6393	0.0472631	0.0640751	NA
Q80SY4	P18-CTX_H2B	0.254654	0.392612	10.3484	0.530717	0.570795	NA
Q80SZ7	P18-CTX_H2B	-0.207915	0.198687	21.7271	0.306858	0.349919	NA
Q80T41	P18-CTX_H2B	-0.0906434	0.146858	21.438	0.543591	0.582842	NA
Q80TA9	P18-CTX_H2B	2.47665	0.322902	22.3484	1.06222e-07	4.56975e-07	NA
Q80TB8	P18-CTX_H2B	1.24559	0.609179	18.6955	0.0552254	0.0735071	NA
Q80TE0	P18-CTX_H2B	-0.800835	0.331934	17.3484	0.0271655	0.0384466	NA
Q80TE4	P18-CTX_H2B	1.24364	0.462987	19.4211	0.0144386	0.0214911	NA
Q80TE7	P18-CTX_H2B	-0.358064	0.17003	21.4225	0.047174	0.0639865	NA
Q80TF3	P18-CTX_H2B	3.78741	0.432635	22.3484	1.12398e-08	6.08298e-08	NA
Q80TF6	P18-CTX_H2B	0.375046	0.307188	20.3484	0.236083	0.276435	NA
Q80TJ1	P18-CTX_H2B	1.95438	0.124794	21.522	3.03637e-13	7.82515e-12	NA
Q80TK0	P18-CTX_H2B	0.68465	0.200091	21.7797	0.00246723	0.00432685	NA
Q80TL0	P18-CTX_H2B	0.79855	0.211453	21.6713	0.00106023	0.00199651	NA
Q80TL4	P18-CTX_H2B	0.666073	0.138842	21.4718	9.15727e-05	0.000211297	NA
Q80TL7	P18-CTX_H2B	0.501846	0.236811	17.3758	0.048764	0.0659118	NA
Q80TM6	P18-CTX_H2B	1.14585	0.185419	22.3484	2.99618e-06	9.43848e-06	NA
Q80TM9	P18-CTX_H2B	1.06585	0.155368	22.3484	6.29523e-07	2.27739e-06	NA
Q80TN5	P18-CTX_H2B	-0.751238	0.227351	22.3484	0.00318164	0.00545596	NA
Q80TN7	P18-CTX_H2B	2.13201	0.164717	22.3484	7.30778e-12	9.69355e-11	NA
Q80TQ2	P18-CTX_H2B	1.68262	0.22297	22.3484	1.38574e-07	5.84996e-07	NA
Q80TR1	P18-CTX_H2B	2.00017	0.180332	22.3484	1.47322e-10	1.32885e-09	NA
Q80TS3	P18-CTX_H2B	0.415905	0.196981	21.6463	0.0465236	0.0631675	NA
Q80TT8	P18-CTX_H2B	0.906148	0.187547	22.3484	7.61823e-05	0.000179573	NA
Q80TV8	P18-CTX_H2B	0.378609	0.149112	22.3484	0.0185675	0.0270368	NA
Q80TY0	P18-CTX_H2B	1.6478	0.294282	22.3484	1.18275e-05	3.27606e-05	NA
Q80TZ3	P18-CTX_H2B	1.88767	0.141534	21.5877	6.74773e-12	9.26871e-11	NA
Q80U22	P18-CTX_H2B	1.69004	0.298177	22.3484	1.00392e-05	2.82686e-05	NA
Q80U23	P18-CTX_H2B	0.435792	0.271718	21.5289	0.123321	0.153971	NA
Q80U28	P18-CTX_H2B	1.67044	0.118454	21.5448	2.3532e-12	3.93072e-11	NA
Q80U30	P18-CTX_H2B	0.93517	0.246872	20.3853	0.00112321	0.00210049	NA
Q80U40	P18-CTX_H2B	1.69187	0.235354	21.5484	3.75628e-07	1.44177e-06	NA
Q80U49	P18-CTX_H2B	1.44749	0.14009	21.9323	6.85715e-10	5.16865e-09	NA
Q80U56	P18-CTX_H2B	1.63983	0.24749	20.3862	1.70567e-06	5.62872e-06	NA
Q80U63	P18-CTX_H2B	0.393902	0.11576	21.4039	0.00262786	0.00457887	NA
Q80U78	P18-CTX_H2B	-1.04093	0.375591	11.3484	0.017711	0.0259059	NA
Q80U87	P18-CTX_H2B	1.16919	0.284917	22.3484	0.000456188	0.000921227	NA
Q80U95	P18-CTX_H2B	1.78453	0.202453	22.3484	9.96627e-09	5.47033e-08	NA
Q80UG2	P18-CTX_H2B	1.51948	0.119696	22.3484	1.0732e-11	1.37634e-10	NA
Q80UG5	P18-CTX_H2B	0.979485	0.214275	21.5255	0.000156956	0.000346713	NA
Q80UJ7	P18-CTX_H2B	0.888093	0.153246	21.5259	8.56185e-06	2.44909e-05	NA
Q80UK0	P18-CTX_H2B	1.94147	0.132036	21.5888	1.00246e-12	1.98535e-11	NA
Q80UM3	P18-CTX_H2B	-0.118391	0.15334	22.3484	0.448155	0.49257	NA
Q80UP3	P18-CTX_H2B	0.156509	0.127814	21.4943	0.234011	0.274364	NA
Q80V91	P18-CTX_H2B	0.27562	0.280879	20.3484	0.337981	0.381551	NA
Q80VC9	P18-CTX_H2B	1.94468	0.164477	22.3484	4.31344e-11	4.52409e-10	NA
Q80VD1	P18-CTX_H2B	-3.68751	0.160131	21.4114	1.35838e-16	3.06545e-14	NA
Q80VJ2	P18-CTX_H2B	0.969471	0.199773	22.3484	7.23108e-05	0.000171493	NA
Q80VP0	P18-CTX_H2B	1.94162	0.111898	21.5897	3.67135e-14	1.37982e-12	NA
Q80VP1	P18-CTX_H2B	0.76437	0.229719	10.3484	0.00730811	0.0115919	NA
Q80W04	P18-CTX_H2B	0.809528	0.218572	22.3484	0.00121413	0.00225648	NA
Q80W37	P18-CTX_H2B	0.528942	0.212285	10.3484	0.0311724	0.043548	NA
Q80W47	P18-CTX_H2B	1.0413	0.285659	21.8954	0.00143533	0.00262966	NA
Q80WC7	P18-CTX_H2B	0.107871	0.182009	21.4872	0.559588	0.598929	NA
Q80WG5	P18-CTX_H2B	0.35809	0.315735	10.3484	0.282322	0.325229	NA
Q80WJ7	P18-CTX_H2B	-1.23679	0.150566	21.5337	4.45709e-08	2.08306e-07	NA
Q80WT5	P18-CTX_H2B	2.24916	0.372909	22.3484	4.24172e-06	1.29112e-05	NA
Q80X50	P18-CTX_H2B	-0.496907	0.177498	22.3484	0.0103518	0.0159599	NA
Q80X80	P18-CTX_H2B	0.735441	0.18285	21.4561	0.00059509	0.00117713	NA
Q80XA6	P18-CTX_H2B	1.52022	0.221844	21.9147	7.11803e-07	2.53106e-06	NA
Q80XI3	P18-CTX_H2B	-0.913813	0.158905	21.6371	9.31226e-06	2.64417e-05	NA
Q80XI4	P18-CTX_H2B	0.530295	0.164854	21.6926	0.00402156	0.00673829	NA
Q80XK6	P18-CTX_H2B	1.8703	0.100696	22.3484	4.45896e-15	3.17525e-13	NA
Q80XN0	P18-CTX_H2B	-1.45622	0.204678	21.5816	4.36624e-07	1.64326e-06	NA
Q80XP9	P18-CTX_H2B	2.59614	0.350485	20.3484	3.36644e-07	1.3051e-06	NA
Q80XQ2	P18-CTX_H2B	1.54505	0.21821	22.3484	3.84554e-07	1.46564e-06	NA
Q80Y24	P18-CTX_H2B	0.110991	0.145321	21.5178	0.453302	0.496613	NA
Q80Y56	P18-CTX_H2B	1.12435	0.152335	22.3484	1.98565e-07	8.14116e-07	NA
Q80YA7	P18-CTX_H2B	0.621094	0.194578	22.3484	0.00415467	0.00693555	NA
Q80YA9	P18-CTX_H2B	0.982921	0.17176	21.8392	9.60259e-06	2.71805e-05	NA
Q80YE4	P18-CTX_H2B	1.11502	0.312251	22.3484	0.00167601	0.0030377	NA
Q80YF9	P18-CTX_H2B	0.632598	0.157936	22.3484	0.000580631	0.00115274	NA
Q80YN3	P18-CTX_H2B	-0.000724793	0.484877	21.6189	0.998821	0.998821	NA
Q80YV4	P18-CTX_H2B	2.00713	0.246613	22.3484	3.94576e-08	1.86015e-07	NA
Q80YX1	P18-CTX_H2B	-1.20334	0.367543	10.3484	0.00801116	0.0125755	NA
Q80Z24	P18-CTX_H2B	-1.00086	0.257164	21.5507	0.000809087	0.00156051	NA
Q80Z38	P18-CTX_H2B	-0.989916	0.121222	21.4241	5.10044e-08	2.34326e-07	NA
Q80ZF8	P18-CTX_H2B	0.0615936	0.258984	20.3484	0.814393	0.836612	NA
Q80ZI6	P18-CTX_H2B	1.88089	0.159922	22.3484	4.77675e-11	4.8777e-10	NA
Q80ZJ1	P18-CTX_H2B	-0.1187	0.271534	21.3484	0.666396	0.703302	NA
Q80ZS3	P18-CTX_H2B	-0.954748	0.155756	21.5995	3.90278e-06	1.2001e-05	NA
Q810A7	P18-CTX_H2B	-3.95929	0.177207	21.4342	2.46566e-16	4.55096e-14	NA
Q810B7	P18-CTX_H2B	0.297121	0.223085	21.9563	0.196564	0.234318	NA
Q810J8	P18-CTX_H2B	2.03956	0.181206	22.3484	1.11337e-10	1.03889e-09	NA
Q810U3	P18-CTX_H2B	0.905573	0.111712	21.4132	5.77595e-08	2.62684e-07	NA
Q810U4	P18-CTX_H2B	0.790585	0.244827	22.3484	0.00380443	0.0064182	NA
Q811D0	P18-CTX_H2B	1.98269	0.203405	21.4931	2.41204e-09	1.55775e-08	NA
Q811L6	P18-CTX_H2B	0.076512	0.24009	22.3484	0.752928	0.780921	NA
Q811P8	P18-CTX_H2B	-0.0804458	0.123645	21.4255	0.52221	0.56254	NA
Q812A2	P18-CTX_H2B	1.39998	0.117916	22.3484	3.97847e-11	4.20537e-10	NA
Q8BFQ8	P18-CTX_H2B	-0.759795	0.144649	21.5823	3.03868e-05	7.72082e-05	NA
Q8BFR5	P18-CTX_H2B	-0.884065	0.231248	21.7088	0.000945356	0.0018013	NA
Q8BFS6	P18-CTX_H2B	1.80994	0.289671	22.3484	2.55447e-06	8.17069e-06	NA
Q8BFT9	P18-CTX_H2B	-0.27458	0.162907	21.4929	0.106357	0.134473	NA
Q8BFU3	P18-CTX_H2B	1.30004	0.1772	22.3484	2.18682e-07	8.84536e-07	NA
Q8BFX3	P18-CTX_H2B	0.921536	0.244388	11.3484	0.00293422	0.00505088	NA
Q8BFY6	P18-CTX_H2B	1.61196	0.265869	22.3484	3.93832e-06	1.20966e-05	NA
Q8BG05	P18-CTX_H2B	-3.42685	0.154779	21.4285	2.99285e-16	4.55096e-14	NA
Q8BG26	P18-CTX_H2B	0.938778	0.216664	21.3484	0.000283762	0.000597092	NA
Q8BG32	P18-CTX_H2B	-0.512795	0.176949	21.7432	0.00840811	0.0131213	NA
Q8BG39	P18-CTX_H2B	2.9004	0.358417	21.9203	5.00875e-08	2.31268e-07	NA
Q8BG40	P18-CTX_H2B	1.04644	0.187672	22.3484	1.25115e-05	3.43019e-05	NA
Q8BG51	P18-CTX_H2B	-0.0157484	0.189025	21.7137	0.934365	0.941673	NA
Q8BG95	P18-CTX_H2B	-0.929781	0.2446	21.6894	0.000997679	0.0018866	NA
Q8BGB5	P18-CTX_H2B	0.182006	0.248568	22.3484	0.471644	0.514832	NA
Q8BGD5	P18-CTX_H2B	0.509097	0.184159	21.5283	0.0114522	0.017459	NA
Q8BGD9	P18-CTX_H2B	1.19169	0.185891	22.3484	1.75334e-06	5.76493e-06	NA
Q8BGE6	P18-CTX_H2B	0.69791	0.340037	18.6955	0.0543948	0.0725085	NA
Q8BGH2	P18-CTX_H2B	-1.18565	0.413703	16.5281	0.0109335	0.0167816	NA
Q8BGH4	P18-CTX_H2B	-0.104698	0.165549	22.3484	0.533525	0.573587	NA
Q8BGK5	P18-CTX_H2B	0.747991	0.286078	20.3484	0.0164468	0.024227	NA
Q8BGN8	P18-CTX_H2B	-1.07614	0.213992	20.3484	6.12287e-05	0.000147801	NA
Q8BGQ1	P18-CTX_H2B	0.67087	0.208815	21.95	0.00401775	0.00673607	NA
Q8BGQ7	P18-CTX_H2B	0.864241	0.120514	22.3484	3.14538e-07	1.23533e-06	NA
Q8BGR6	P18-CTX_H2B	0.460394	0.167768	22.3484	0.0117373	0.0178233	NA
Q8BGT6	P18-CTX_H2B	0.95348	0.205571	22.3484	0.000122449	0.000276354	NA
Q8BGT8	P18-CTX_H2B	1.01579	0.138455	22.3484	2.18674e-07	8.84536e-07	NA
Q8BGX2	P18-CTX_H2B	-0.974133	0.162923	21.5424	5.57839e-06	1.66246e-05	NA
Q8BGZ1	P18-CTX_H2B	1.18579	0.286579	21.3484	0.000454114	0.000917724	NA
Q8BH43	P18-CTX_H2B	0.301322	0.313028	22.3484	0.346046	0.389194	NA
Q8BH44	P18-CTX_H2B	-0.0552672	0.177997	21.4607	0.75918	0.786802	NA
Q8BH57	P18-CTX_H2B	0.391205	0.121777	21.4793	0.00409774	0.00684897	NA
Q8BH58	P18-CTX_H2B	0.871396	0.181964	22.3484	8.45952e-05	0.000196831	NA
Q8BH59	P18-CTX_H2B	-1.03985	0.141925	21.3865	2.92594e-07	1.15585e-06	NA
Q8BH60	P18-CTX_H2B	0.747171	0.296405	22.3484	0.019331	0.0280481	NA
Q8BH66	P18-CTX_H2B	1.20343	0.155948	21.6514	1.18922e-07	5.05979e-07	NA
Q8BH79	P18-CTX_H2B	-0.316705	0.217819	10.3484	0.175598	0.211657	NA
Q8BH95	P18-CTX_H2B	-1.3155	0.263716	21.7065	5.62345e-05	0.00013709	NA
Q8BHC1	P18-CTX_H2B	0.029857	0.153924	21.4942	0.848019	0.86496	NA
Q8BHC4	P18-CTX_H2B	-0.991344	0.203153	10.3484	0.000581406	0.00115344	NA
Q8BHE3	P18-CTX_H2B	0.0388993	0.167048	21.532	0.818067	0.839791	NA
Q8BHG1	P18-CTX_H2B	0.281214	0.145579	22.3484	0.0661752	0.0867168	NA
Q8BHL3	P18-CTX_H2B	0.694701	0.122202	21.4688	1.11802e-05	3.11894e-05	NA
Q8BHL5	P18-CTX_H2B	0.166843	0.373531	22.3484	0.659415	0.696478	NA
Q8BHN3	P18-CTX_H2B	-1.2171	0.184265	21.5562	1.34578e-06	4.54076e-06	NA
Q8BHZ0	P18-CTX_H2B	-0.556568	0.312489	21.9803	0.0887245	0.113517	NA
Q8BI84	P18-CTX_H2B	-1.73441	0.195192	21.5337	1.18786e-08	6.36507e-08	NA
Q8BIE6	P18-CTX_H2B	2.06472	0.168131	21.541	3.38305e-11	3.6184e-10	NA
Q8BIF0	P18-CTX_H2B	0.0937538	0.193931	22.3484	0.633488	0.672506	NA
Q8BIF2	P18-CTX_H2B	-3.19189	0.250476	21.553	1.65939e-11	1.97811e-10	NA
Q8BIG7	P18-CTX_H2B	-0.801818	0.15006	21.4357	2.50478e-05	6.51634e-05	NA
Q8BIK4	P18-CTX_H2B	2.07138	0.196456	22.3484	3.83921e-10	3.11045e-09	NA
Q8BIW1	P18-CTX_H2B	1.83451	0.129778	22.3477	1.2536e-12	2.35573e-11	NA
Q8BIZ1	P18-CTX_H2B	0.225945	0.173987	21.473	0.207845	0.246247	NA
Q8BJ42	P18-CTX_H2B	0.472479	0.254611	21.508	0.077254	0.0999758	NA
Q8BJ71	P18-CTX_H2B	-0.949361	0.253932	22.3484	0.0011151	0.00208853	NA
Q8BJH1	P18-CTX_H2B	0.627618	0.181878	22.3484	0.00223998	0.00396168	NA
Q8BJI1	P18-CTX_H2B	1.84279	0.185795	21.5081	1.75949e-09	1.1756e-08	NA
Q8BJU0	P18-CTX_H2B	0.782252	0.186931	22.3484	0.000373726	0.000765559	NA
Q8BJW6	P18-CTX_H2B	-0.117117	0.225868	21.3484	0.609427	0.649256	NA
Q8BJY1	P18-CTX_H2B	-0.48466	0.261611	21.9378	0.0774421	0.10014	NA
Q8BK08	P18-CTX_H2B	-0.703826	0.187331	21.4797	0.00112431	0.0021011	NA
Q8BK63	P18-CTX_H2B	-0.984446	0.168606	21.5925	7.64653e-06	2.20357e-05	NA
Q8BK64	P18-CTX_H2B	0.577632	0.22868	22.3484	0.019113	0.0277765	NA
Q8BK67	P18-CTX_H2B	-1.24656	0.159331	22.3484	7.65245e-08	3.41145e-07	NA
Q8BKC5	P18-CTX_H2B	0.57716	0.0995968	21.6945	8.31339e-06	2.38558e-05	NA
Q8BKC8	P18-CTX_H2B	1.16213	0.411308	16.6623	0.0118314	0.017948	NA
Q8BKI2	P18-CTX_H2B	0.248513	0.128574	21.5069	0.066531	0.0871408	NA
Q8BKX1	P18-CTX_H2B	1.58705	0.180671	21.5456	1.43856e-08	7.48603e-08	NA
Q8BKZ9	P18-CTX_H2B	-1.15709	0.250599	21.5416	0.000140177	0.000313557	NA
Q8BL48	P18-CTX_H2B	0.679358	0.170746	22.3484	0.000619844	0.00122252	NA
Q8BL65	P18-CTX_H2B	0.71014	0.202437	21.5211	0.00203535	0.00363542	NA
Q8BL66	P18-CTX_H2B	0.397907	0.152027	21.4873	0.0159103	0.0234879	NA
Q8BL86	P18-CTX_H2B	-0.41868	0.130335	21.6719	0.0040667	0.00680551	NA
Q8BLE7	P18-CTX_H2B	1.10182	0.185061	21.936	5.49272e-06	1.64054e-05	NA
Q8BLF1	P18-CTX_H2B	-1.01719	0.248221	21.4809	0.00049458	0.000992093	NA
Q8BLK3	P18-CTX_H2B	-0.109902	0.162925	21.472	0.507156	0.548906	NA
Q8BLK9	P18-CTX_H2B	1.10299	0.176895	22.3484	2.63258e-06	8.40068e-06	NA
Q8BLN5	P18-CTX_H2B	-0.419258	0.163043	22.3484	0.0172858	0.02538	NA
Q8BLQ9	P18-CTX_H2B	0.579868	0.274696	21.6679	0.0465545	0.0631777	NA
Q8BLR2	P18-CTX_H2B	3.54721	0.164691	21.9336	3.02724e-16	4.55096e-14	NA
Q8BLY2	P18-CTX_H2B	-1.39262	0.311236	21.918	0.000190806	0.000415409	NA
Q8BM65	P18-CTX_H2B	2.05478	0.220871	22.3484	3.82486e-09	2.34164e-08	NA
Q8BM85	P18-CTX_H2B	1.19851	0.138937	22.3484	1.45354e-08	7.5206e-08	NA
Q8BMA6	P18-CTX_H2B	-1.30874	0.218807	22.3484	4.77295e-06	1.43987e-05	NA
Q8BMF3	P18-CTX_H2B	-0.102901	0.314294	21.5579	0.746522	0.774871	NA
Q8BMF4	P18-CTX_H2B	-1.56188	0.359793	10.3484	0.00135146	0.00248948	NA
Q8BMG7	P18-CTX_H2B	1.11002	0.164042	21.7848	8.89513e-07	3.09621e-06	NA
Q8BMJ2	P18-CTX_H2B	-0.865312	0.226055	21.9792	0.000918094	0.00175573	NA
Q8BMJ3	P18-CTX_H2B	-1.4342	0.252479	22.3484	9.74203e-06	2.7489e-05	NA
Q8BMK4	P18-CTX_H2B	-1.90315	0.258786	22.3484	2.10435e-07	8.56295e-07	NA
Q8BMS1	P18-CTX_H2B	-1.21935	0.154373	21.4346	8.74806e-08	3.86801e-07	NA
Q8BNA6	P18-CTX_H2B	2.06571	0.266203	22.3484	8.76449e-08	3.86896e-07	NA
Q8BNN1	P18-CTX_H2B	1.95594	0.361409	11.3484	0.000190818	0.000415409	NA
Q8BNU0	P18-CTX_H2B	0.0993522	0.225623	22.3484	0.663916	0.700958	NA
Q8BNY6	P18-CTX_H2B	0.0340223	0.362405	22.3484	0.926042	0.93398	NA
Q8BP47	P18-CTX_H2B	0.338239	0.136499	21.6685	0.0215046	0.0310354	NA
Q8BP48	P18-CTX_H2B	-0.84921	0.19941	22.3484	0.000311591	0.000649088	NA
Q8BP67	P18-CTX_H2B	-1.78912	0.275108	22.3484	1.41677e-06	4.75654e-06	NA
Q8BPM0	P18-CTX_H2B	0.695837	0.120298	22.3484	7.60757e-06	2.19468e-05	NA
Q8BPM2	P18-CTX_H2B	0.922239	0.237579	11.3484	0.00241332	0.00424606	NA
Q8BPN8	P18-CTX_H2B	2.53396	0.181937	21.7757	2.54015e-12	4.19124e-11	NA
Q8BPQ7	P18-CTX_H2B	2.06916	0.197183	22.3484	4.19763e-10	3.38059e-09	NA
Q8BQ30	P18-CTX_H2B	0.988534	0.487708	14.3747	0.0616387	0.0813631	NA
Q8BQP9	P18-CTX_H2B	-0.3785	0.280587	21.4569	0.191415	0.228987	NA
Q8BR63	P18-CTX_H2B	0.929927	0.286359	21.3484	0.00379672	0.00640919	NA
Q8BR86	P18-CTX_H2B	1.36756	0.240824	22.3484	9.78504e-06	2.75816e-05	NA
Q8BR92	P18-CTX_H2B	1.16658	0.112712	21.7984	7.09827e-10	5.2769e-09	NA
Q8BRK8	P18-CTX_H2B	1.42506	0.194146	20.3712	3.83422e-07	1.46338e-06	NA
Q8BRT1	P18-CTX_H2B	1.57947	0.133718	22.3484	4.39501e-11	4.57419e-10	NA
Q8BRV5	P18-CTX_H2B	0.938675	0.268896	21.6415	0.00210685	0.00374582	NA
Q8BSS9	P18-CTX_H2B	1.57943	0.129282	22.3484	2.27953e-11	2.58093e-10	NA
Q8BSY0	P18-CTX_H2B	-0.439885	0.316889	21.8279	0.179102	0.215304	NA
Q8BTG7	P18-CTX_H2B	0.821084	0.272981	19.5112	0.00708612	0.0112662	NA
Q8BTI8	P18-CTX_H2B	-2.41189	0.126274	21.4374	6.0671e-15	3.56904e-13	NA
Q8BTI9	P18-CTX_H2B	0.522288	0.354371	18.3484	0.157474	0.191861	NA
Q8BTU1	P18-CTX_H2B	-0.819139	0.15464	22.3484	2.44982e-05	6.39268e-05	NA
Q8BTX9	P18-CTX_H2B	-0.0772664	0.171873	22.3484	0.657361	0.694851	NA
Q8BTZ7	P18-CTX_H2B	0.0854887	0.304736	18.3757	0.782202	0.807877	NA
Q8BU30	P18-CTX_H2B	-1.55479	0.178267	21.8378	1.45314e-08	7.5206e-08	NA
Q8BUK6	P18-CTX_H2B	-1.15663	0.223706	21.6882	3.64339e-05	9.17118e-05	NA
Q8BUM9	P18-CTX_H2B	0.831532	0.268666	22.3484	0.00522158	0.00854786	NA
Q8BUV3	P18-CTX_H2B	0.736436	0.111246	21.4999	1.31963e-06	4.46364e-06	NA
Q8BUY5	P18-CTX_H2B	-0.0670322	0.274575	21.3484	0.80946	0.832219	NA
Q8BVE3	P18-CTX_H2B	0.733293	0.13136	21.418	1.43253e-05	3.87255e-05	NA
Q8BVI4	P18-CTX_H2B	-0.169801	0.170321	21.5055	0.329876	0.373491	NA
Q8BVL9	P18-CTX_H2B	1.33981	0.330327	22.3484	0.00051279	0.0010271	NA
Q8BVQ5	P18-CTX_H2B	0.283099	0.197698	20.3484	0.167333	0.203278	NA
Q8BW75	P18-CTX_H2B	-0.281659	0.223951	21.595	0.221937	0.260887	NA
Q8BW96	P18-CTX_H2B	1.92425	0.338577	22.3484	9.67573e-06	2.73304e-05	NA
Q8BWF0	P18-CTX_H2B	-1.04925	0.184719	21.467	1.13037e-05	3.14691e-05	NA
Q8BWG8	P18-CTX_H2B	0.273453	0.162107	21.6514	0.105985	0.134142	NA
Q8BWM0	P18-CTX_H2B	-0.422982	0.198324	21.7763	0.0444681	0.0606505	NA
Q8BWS5	P18-CTX_H2B	1.39652	0.15799	22.3484	9.48782e-09	5.2396e-08	NA
Q8BWT1	P18-CTX_H2B	-0.615312	0.224422	21.862	0.0119474	0.0181017	NA
Q8BWT5	P18-CTX_H2B	0.989254	0.132407	22.3484	1.63036e-07	6.78732e-07	NA
Q8BWW4	P18-CTX_H2B	-1.55452	0.16272	21.7444	3.07884e-09	1.94658e-08	NA
Q8BWY3	P18-CTX_H2B	0.267563	0.33672	22.3484	0.435195	0.479704	NA
Q8BWZ3	P18-CTX_H2B	-0.389141	0.321012	22.3484	0.238084	0.278657	NA
Q8BX10	P18-CTX_H2B	-1.74664	0.15869	21.6126	2.52343e-10	2.13388e-09	NA
Q8BX70	P18-CTX_H2B	1.81459	0.170753	21.5627	4.93559e-10	3.86003e-09	NA
Q8BXJ8	P18-CTX_H2B	-2.26698	0.258692	10.3484	4.15759e-06	1.2698e-05	NA
Q8BXK8	P18-CTX_H2B	2.355	0.250276	22.3484	3.11651e-09	1.9658e-08	NA
Q8BXR1	P18-CTX_H2B	1.24792	0.242483	20.6229	4.48097e-05	0.000110938	NA
Q8BXR9	P18-CTX_H2B	0.875085	0.132906	21.6587	1.37696e-06	4.63439e-06	NA
Q8BXT1	P18-CTX_H2B	3.28341	0.237165	22.3484	1.9065e-12	3.30704e-11	NA
Q8BXV2	P18-CTX_H2B	-1.33841	0.173587	21.6154	1.21915e-07	5.17087e-07	NA
Q8BY87	P18-CTX_H2B	1.99317	0.150649	21.7085	7.26075e-12	9.67861e-11	NA
Q8BY89	P18-CTX_H2B	-0.154043	0.347546	10.3484	0.666722	0.703372	NA
Q8BYA0	P18-CTX_H2B	1.36004	0.153626	22.3484	9.23337e-09	5.14105e-08	NA
Q8BYI9	P18-CTX_H2B	-0.245816	0.394883	19.4525	0.54084	0.580299	NA
Q8BYK6	P18-CTX_H2B	-0.393925	0.134336	21.8427	0.00774672	0.0122231	NA
Q8BYN5	P18-CTX_H2B	1.59611	0.17061	22.3484	3.45867e-09	2.13679e-08	NA
Q8BYR5	P18-CTX_H2B	2.28618	0.347462	20.5943	1.79003e-06	5.86421e-06	NA
Q8BZ05	P18-CTX_H2B	0.666562	0.314408	22.3484	0.0453336	0.0617066	NA
Q8BZ98	P18-CTX_H2B	0.463882	0.136093	21.5085	0.00257893	0.00450232	NA
Q8BZA9	P18-CTX_H2B	-0.643472	0.263788	21.9472	0.0232594	0.0333193	NA
Q8BZM1	P18-CTX_H2B	0.274451	0.211094	10.3484	0.221764	0.260797	NA
Q8BZZ3	P18-CTX_H2B	2.7129	0.206071	11.3484	3.18117e-08	1.52089e-07	NA
Q8C015	P18-CTX_H2B	1.47761	0.122351	22.3484	2.85588e-11	3.12875e-10	NA
Q8C050	P18-CTX_H2B	-0.112889	0.277212	22.3484	0.687713	0.722845	NA
Q8C052	P18-CTX_H2B	0.694732	0.153057	22.3484	0.000156254	0.000345443	NA
Q8C078	P18-CTX_H2B	1.15296	0.166171	21.5535	6.4548e-07	2.32309e-06	NA
Q8C079	P18-CTX_H2B	0.536898	0.162716	22.3484	0.00321752	0.00550355	NA
Q8C080	P18-CTX_H2B	1.53341	0.177344	22.3484	1.39523e-08	7.30269e-08	NA
Q8C0C7	P18-CTX_H2B	-1.81411	0.370595	22.3484	6.52017e-05	0.000156138	NA
Q8C0D4	P18-CTX_H2B	0.473377	0.15356	22.3484	0.0053751	0.00876734	NA
Q8C0D5	P18-CTX_H2B	1.14694	0.191192	22.3484	4.57888e-06	1.38596e-05	NA
Q8C0E2	P18-CTX_H2B	0.679031	0.123101	21.5785	1.63025e-05	4.36347e-05	NA
Q8C0I1	P18-CTX_H2B	-0.735379	0.283	11.6485	0.0237746	0.0339853	NA
Q8C0L0	P18-CTX_H2B	-1.09886	0.197744	21.6509	1.4633e-05	3.94786e-05	NA
Q8C0L9	P18-CTX_H2B	0.221753	0.282227	20.626	0.440962	0.485453	NA
Q8C0M9	P18-CTX_H2B	0.214224	0.177383	21.6833	0.240175	0.280498	NA
Q8C0T5	P18-CTX_H2B	0.329055	0.134185	21.4183	0.0228424	0.0327913	NA
Q8C163	P18-CTX_H2B	-0.972417	0.354927	20.7989	0.0123434	0.0186495	NA
Q8C167	P18-CTX_H2B	-1.5034	0.289101	16.3484	8.17719e-05	0.00019158	NA
Q8C170	P18-CTX_H2B	0.741483	0.196462	22.3484	0.00102253	0.00192954	NA
Q8C1A5	P18-CTX_H2B	-0.68488	0.142556	21.4465	9.0327e-05	0.000208732	NA
Q8C1B1	P18-CTX_H2B	0.803958	0.113516	21.4969	4.79072e-07	1.78073e-06	NA
Q8C1B7	P18-CTX_H2B	0.8475	0.230974	21.4998	0.00138634	0.00255026	NA
Q8C2Q3	P18-CTX_H2B	-3.65742	0.177192	21.5431	1.11606e-15	1.20802e-13	NA
Q8C3Q5	P18-CTX_H2B	-1.0332	0.288367	21.3484	0.00171867	0.00310878	NA
Q8C3W1	P18-CTX_H2B	1.08914	0.199306	22.3484	1.63456e-05	4.37067e-05	NA
Q8C419	P18-CTX_H2B	2.73721	0.654911	22.0096	0.000388898	0.000793035	NA
Q8C437	P18-CTX_H2B	0.85596	0.237118	21.5702	0.0015917	0.00289459	NA
Q8C522	P18-CTX_H2B	-0.227823	0.272274	21.8575	0.411793	0.456311	NA
Q8C561	P18-CTX_H2B	0.429199	0.134947	21.5201	0.00440841	0.00732299	NA
Q8C570	P18-CTX_H2B	0.361707	0.160286	22.3484	0.0341359	0.0472489	NA
Q8C5H8	P18-CTX_H2B	-0.595439	0.250539	21.9192	0.0266324	0.037791	NA
Q8C6B2	P18-CTX_H2B	0.778748	0.231447	10.3484	0.00685514	0.010944	NA
Q8C6E0	P18-CTX_H2B	1.28834	0.211787	11.3484	6.94385e-05	0.000165551	NA
Q8C6G8	P18-CTX_H2B	0.047135	0.132049	21.4374	0.724618	0.755613	NA
Q8C729	P18-CTX_H2B	0.554489	0.199575	19.3646	0.0118327	0.017948	NA
Q8C754	P18-CTX_H2B	0.44589	0.166774	21.8041	0.0139391	0.0208394	NA
Q8C7D2	P18-CTX_H2B	0.638289	0.29154	10.3484	0.0525138	0.0704873	NA
Q8C7M3	P18-CTX_H2B	1.51669	0.406194	21.8344	0.00116317	0.00216772	NA
Q8C7R4	P18-CTX_H2B	1.36166	0.127125	22.3484	2.85432e-10	2.39127e-09	NA
Q8C863	P18-CTX_H2B	0.962392	0.262636	22.3484	0.0013361	0.00246454	NA
Q8C878	P18-CTX_H2B	-1.1903	0.142725	21.4476	3.5735e-08	1.69945e-07	NA
Q8C8N2	P18-CTX_H2B	-0.600568	0.185214	21.4348	0.00382592	0.00645043	NA
Q8C8R3	P18-CTX_H2B	3.12147	0.202593	22.3484	2.17019e-13	6.11723e-12	NA
Q8C996	P18-CTX_H2B	-0.523391	0.25604	21.9281	0.0531284	0.0711358	NA
Q8C9H6	P18-CTX_H2B	Inf	NA	NA	NA	NA	oneConditionMissing
Q8CA71	P18-CTX_H2B	Inf	NA	NA	NA	NA	oneConditionMissing
Q8CA95	P18-CTX_H2B	4.46931	0.313154	20.7004	3.50848e-12	5.58467e-11	NA
Q8CAA7	P18-CTX_H2B	0.542453	0.141515	21.4446	0.000938711	0.00179136	NA
Q8CAQ8	P18-CTX_H2B	-0.420596	0.157746	21.447	0.0142901	0.0212819	NA
Q8CAY6	P18-CTX_H2B	0.130923	0.221131	22.3484	0.559753	0.598929	NA
Q8CB44	P18-CTX_H2B	-0.675289	0.261638	17.4061	0.0191787	0.027842	NA
Q8CBE3	P18-CTX_H2B	0.103989	0.117419	21.4817	0.385625	0.430133	NA
Q8CBW3	P18-CTX_H2B	0.890893	0.148098	21.637	5.03656e-06	1.51265e-05	NA
Q8CBX0	P18-CTX_H2B	0.322003	0.219709	21.926	0.156954	0.1914	NA
Q8CBY8	P18-CTX_H2B	0.0995496	0.100894	21.4232	0.334818	0.378453	NA
Q8CC35	P18-CTX_H2B	-0.975783	0.147185	21.3769	1.32951e-06	4.49146e-06	NA
Q8CCB4	P18-CTX_H2B	0.649945	0.252691	22.3484	0.0172615	0.0253582	NA
Q8CCJ4	P18-CTX_H2B	-0.0695463	0.232064	22.3484	0.767186	0.794187	NA
Q8CCK0	P18-CTX_H2B	-1.42649	0.16238	22.3484	1.05735e-08	5.76854e-08	NA
Q8CCN5	P18-CTX_H2B	1.73497	0.143748	21.8568	3.87807e-11	4.11532e-10	NA
Q8CCS6	P18-CTX_H2B	-2.71965	0.247442	21.9862	2.12129e-10	1.82809e-09	NA
Q8CCT4	P18-CTX_H2B	-2.81953	0.453565	21.8779	3.0245e-06	9.50557e-06	NA
Q8CD54	P18-CTX_H2B	-0.640295	0.339725	22.3484	0.0725355	0.0943658	NA
Q8CDA1	P18-CTX_H2B	0.95076	0.170086	22.3484	1.21001e-05	3.33769e-05	NA
Q8CDG3	P18-CTX_H2B	0.98163	0.152973	22.3484	1.72805e-06	5.69562e-06	NA
Q8CDN6	P18-CTX_H2B	0.14245	0.163383	21.7654	0.392793	0.437586	NA
Q8CEE7	P18-CTX_H2B	-1.58468	0.25975	21.7683	4.0338e-06	1.23478e-05	NA
Q8CES0	P18-CTX_H2B	-0.0445848	0.155624	22.3484	0.777141	0.802957	NA
Q8CFI0	P18-CTX_H2B	1.6325	0.145787	22.3484	1.22832e-10	1.12672e-09	NA
Q8CFI2	P18-CTX_H2B	0.544237	0.233719	21.9642	0.0294837	0.0414027	NA
Q8CFN5	P18-CTX_H2B	-5.31102	0.357832	10.3484	2.61342e-08	1.27883e-07	NA
Q8CG80	P18-CTX_H2B	2.79727	0.306115	11.3484	1.43231e-06	4.79681e-06	NA
Q8CGC7	P18-CTX_H2B	-1.19845	0.126136	21.4577	3.845e-09	2.34337e-08	NA
Q8CGE9	P18-CTX_H2B	1.87822	0.355443	10.3484	0.000317158	0.000658656	NA
Q8CGF6	P18-CTX_H2B	2.65927	0.107998	21.5008	3.04967e-17	1.44837e-14	NA
Q8CGK3	P18-CTX_H2B	-1.09299	0.158104	21.5038	6.90795e-07	2.46608e-06	NA
Q8CGK7	P18-CTX_H2B	3.93786	0.31514	22.3484	1.46481e-11	1.79357e-10	NA
Q8CGU1	P18-CTX_H2B	1.07128	0.274269	19.3484	0.000923026	0.00176392	NA
Q8CGY8	P18-CTX_H2B	1.20961	0.146404	21.4922	4.10744e-08	1.9263e-07	NA
Q8CH09	P18-CTX_H2B	-3.26131	0.233002	21.5389	2.73444e-12	4.48448e-11	NA
Q8CH18	P18-CTX_H2B	-3.56304	0.26054	21.6686	3.92023e-12	6.02735e-11	NA
Q8CH25	P18-CTX_H2B	-3.13918	0.201991	21.6391	3.21487e-13	8.13032e-12	NA
Q8CH72	P18-CTX_H2B	0.689643	0.139291	21.5786	6.24905e-05	0.000150311	NA
Q8CH77	P18-CTX_H2B	1.34293	0.132012	22.3484	7.48731e-10	5.55086e-09	NA
Q8CHC4	P18-CTX_H2B	1.71859	0.172505	21.525	1.61266e-09	1.09645e-08	NA
Q8CHG3	P18-CTX_H2B	1.42261	0.147977	22.3484	2.1133e-09	1.3813e-08	NA
Q8CHG7	P18-CTX_H2B	1.3943	0.132927	21.5181	6.40236e-10	4.85288e-09	NA
Q8CHH9	P18-CTX_H2B	0.307964	0.577217	20.644	0.599363	0.639541	NA
Q8CHK3	P18-CTX_H2B	-0.373185	0.214124	21.3484	0.0957488	0.121813	NA
Q8CHP5	P18-CTX_H2B	-0.354197	0.344875	22.3484	0.315395	0.358897	NA
Q8CHP8	P18-CTX_H2B	0.467881	0.220106	21.6223	0.0452008	0.0615568	NA
Q8CHT1	P18-CTX_H2B	0.236585	0.156994	21.7764	0.14619	0.178919	NA
Q8CHU3	P18-CTX_H2B	0.626166	0.140149	21.4903	0.000202142	0.000436331	NA
Q8CI08	P18-CTX_H2B	0.304858	0.438291	20.3484	0.494572	0.536613	NA
Q8CI32	P18-CTX_H2B	1.22419	0.152088	22.3484	4.75637e-08	2.20767e-07	NA
Q8CI51	P18-CTX_H2B	-0.616198	0.229819	22.3484	0.0135305	0.020262	NA
Q8CI61	P18-CTX_H2B	-0.655794	0.216446	21.523	0.00625459	0.0100684	NA
Q8CI71	P18-CTX_H2B	1.36753	0.1443	21.8055	3.45674e-09	2.13679e-08	NA
Q8CI75	P18-CTX_H2B	1.35148	0.181063	22.3484	1.65599e-07	6.88344e-07	NA
Q8CI94	P18-CTX_H2B	0.365328	0.143615	21.5516	0.0186752	0.0271548	NA
Q8CIB5	P18-CTX_H2B	0.857012	0.366435	22.3484	0.0286797	0.0404051	NA
Q8CIE6	P18-CTX_H2B	-0.668623	0.113903	21.6459	7.04052e-06	2.05964e-05	NA
Q8CIG8	P18-CTX_H2B	0.335506	0.109115	21.7427	0.00559257	0.00908954	NA
Q8CIN4	P18-CTX_H2B	1.1895	0.175149	22.3484	7.35176e-07	2.60391e-06	NA
Q8CIP4	P18-CTX_H2B	0.677985	0.1405	21.7642	8.26821e-05	0.000193211	NA
Q8CIQ7	P18-CTX_H2B	1.60237	0.269427	22.3484	5.17056e-06	1.54774e-05	NA
Q8CIV8	P18-CTX_H2B	0.826201	0.169185	22.3484	6.7097e-05	0.000160534	NA
Q8CJ19	P18-CTX_H2B	1.82058	0.142861	22.3484	9.94211e-12	1.28724e-10	NA
Q8CJF7	P18-CTX_H2B	-2.16178	0.243154	21.8305	1.04712e-08	5.72424e-08	NA
Q8CJG0	P18-CTX_H2B	0.231959	0.23025	22.3484	0.324517	0.367886	NA
Q8JZK9	P18-CTX_H2B	-0.860772	0.292261	11.3484	0.0129243	0.0194403	NA
Q8JZN5	P18-CTX_H2B	-1.22054	0.141638	21.4637	2.05442e-08	1.02949e-07	NA
Q8JZN7	P18-CTX_H2B	-0.353276	0.277614	10.3484	0.231029	0.271103	NA
Q8JZP2	P18-CTX_H2B	-0.106625	0.141568	21.8841	0.459375	0.502696	NA
Q8JZS0	P18-CTX_H2B	-1.02436	0.247082	21.5205	0.000439128	0.000892103	NA
Q8JZU2	P18-CTX_H2B	-0.414811	0.271745	21.8087	0.141267	0.173579	NA
Q8JZW4	P18-CTX_H2B	1.14468	0.29615	22.3484	0.000818637	0.00157668	NA
Q8JZW5	P18-CTX_H2B	1.82421	0.431887	19.3864	0.000442279	0.000897156	NA
Q8JZX4	P18-CTX_H2B	-3.12109	0.198904	21.5889	2.76482e-13	7.41138e-12	NA
Q8JZZ7	P18-CTX_H2B	-0.156159	0.143132	22.3484	0.28689	0.329929	NA
Q8K004	P18-CTX_H2B	2.28191	0.221653	22.3484	5.99811e-10	4.61105e-09	NA
Q8K010	P18-CTX_H2B	1.2023	0.24412	22.3484	6.06005e-05	0.000146415	NA
Q8K012	P18-CTX_H2B	2.19261	0.120041	22.3484	6.33848e-15	3.60506e-13	NA
Q8K021	P18-CTX_H2B	0.287972	0.120329	21.416	0.0259291	0.0368703	NA
Q8K070	P18-CTX_H2B	1.19602	0.259673	10.3484	0.000888233	0.00169983	NA
Q8K097	P18-CTX_H2B	0.778172	0.478969	10.3484	0.134264	0.166203	NA
Q8K0C4	P18-CTX_H2B	-0.553331	0.210161	22.3484	0.015078	0.0223323	NA
Q8K0D0	P18-CTX_H2B	-0.245491	0.157782	21.6066	0.134263	0.166203	NA
Q8K0D5	P18-CTX_H2B	-0.831511	0.270365	21.6323	0.00560527	0.00910436	NA
Q8K0P3	P18-CTX_H2B	1.61075	0.201206	22.3484	5.21351e-08	2.39115e-07	NA
Q8K0S0	P18-CTX_H2B	0.0792892	0.291186	21.4594	0.787996	0.812621	NA
Q8K0T0	P18-CTX_H2B	2.41019	0.181944	22.3484	4.61095e-12	6.84269e-11	NA
Q8K0T4	P18-CTX_H2B	0.587932	0.165309	21.9149	0.00177488	0.00320403	NA
Q8K0U4	P18-CTX_H2B	1.63667	0.142446	21.5728	1.16146e-10	1.07267e-09	NA
Q8K183	P18-CTX_H2B	0.411004	0.206356	20.3613	0.0599854	0.079458	NA
Q8K190	P18-CTX_H2B	-0.107286	0.258792	10.3484	0.686925	0.722432	NA
Q8K1A6	P18-CTX_H2B	0.620805	0.171144	22.3484	0.00146162	0.00267239	NA
Q8K1H1	P18-CTX_H2B	1.00836	0.229703	22.3484	0.000225594	0.000479919	NA
Q8K1J6	P18-CTX_H2B	-1.28869	0.338008	18.3484	0.00123862	0.00229568	NA
Q8K1M6	P18-CTX_H2B	0.362781	0.210499	21.6398	0.0990714	0.125863	NA
Q8K1X1	P18-CTX_H2B	0.365085	0.305784	22.3484	0.245024	0.285422	NA
Q8K212	P18-CTX_H2B	1.32886	0.112673	21.6081	6.97221e-11	6.80722e-10	NA
Q8K221	P18-CTX_H2B	0.886122	0.269366	21.855	0.00336372	0.00573911	NA
Q8K268	P18-CTX_H2B	0.769928	0.449671	17.548	0.104474	0.132415	NA
Q8K274	P18-CTX_H2B	0.50465	0.267277	22.3484	0.072062	0.0938401	NA
Q8K2B3	P18-CTX_H2B	-0.668399	0.155707	21.4663	0.00030935	0.000645413	NA
Q8K2C6	P18-CTX_H2B	-0.898405	0.425158	16.3484	0.050302	0.0676864	NA
Q8K2C9	P18-CTX_H2B	-0.123895	0.312679	21.9501	0.695757	0.730444	NA
Q8K2I1	P18-CTX_H2B	1.34561	0.17902	22.3484	1.47821e-07	6.19202e-07	NA
Q8K2K6	P18-CTX_H2B	0.969996	0.149167	22.3484	1.41858e-06	4.75672e-06	NA
Q8K2L8	P18-CTX_H2B	-0.377289	0.539432	19.3484	0.492614	0.535132	NA
Q8K2Q7	P18-CTX_H2B	-0.227555	0.159652	22.3484	0.167883	0.203626	NA
Q8K2Q9	P18-CTX_H2B	2.11478	0.365685	21.7529	8.45984e-06	2.42504e-05	NA
Q8K2T1	P18-CTX_H2B	1.35816	0.218833	22.3484	2.81601e-06	8.90202e-06	NA
Q8K310	P18-CTX_H2B	-4.41603	0.222316	21.5035	2.55454e-15	2.03312e-13	NA
Q8K341	P18-CTX_H2B	1.5274	0.282699	22.3484	1.8968e-05	5.04198e-05	NA
Q8K354	P18-CTX_H2B	0.880552	0.423956	17.4582	0.0528596	0.070846	NA
Q8K382	P18-CTX_H2B	1.02321	0.230762	22.3484	0.000202322	0.000436331	NA
Q8K386	P18-CTX_H2B	0.482	0.141577	21.5034	0.00260447	0.00454396	NA
Q8K394	P18-CTX_H2B	0.285183	0.123931	21.454	0.0314966	0.0438876	NA
Q8K3H0	P18-CTX_H2B	0.651416	0.293444	22.3484	0.0368694	0.0506954	NA
Q8K3I4	P18-CTX_H2B	2.13354	0.31637	22.3484	8.18656e-07	2.86954e-06	NA
Q8K3J1	P18-CTX_H2B	-0.69472	0.165949	21.4529	0.000400398	0.000815257	NA
Q8K400	P18-CTX_H2B	0.794177	0.158289	21.6389	5.29094e-05	0.000129451	NA
Q8K4B0	P18-CTX_H2B	-3.23452	0.201985	21.7776	1.57421e-13	4.5317e-12	NA
Q8K4G5	P18-CTX_H2B	1.82903	0.147387	22.3484	1.67747e-11	1.99089e-10	NA
Q8K4P8	P18-CTX_H2B	0.905215	0.18041	22.3484	4.83392e-05	0.000119023	NA
Q8K4Q0	P18-CTX_H2B	1.04351	0.14332	21.8484	2.83329e-07	1.12089e-06	NA
Q8K4R4	P18-CTX_H2B	0.318056	0.108894	21.5477	0.00802896	0.012595	NA
Q8K4X7	P18-CTX_H2B	-0.0779058	0.195524	22.3484	0.694082	0.72911	NA
Q8K4Z3	P18-CTX_H2B	-0.0794544	0.350537	22.3484	0.822745	0.843953	NA
Q8K4Z5	P18-CTX_H2B	-3.00636	0.159788	21.4921	7.80705e-15	3.9122e-13	NA
Q8K596	P18-CTX_H2B	0.437484	0.321811	21.7364	0.187944	0.225033	NA
Q8QZT1	P18-CTX_H2B	-1.0373	0.241124	21.7055	0.000296131	0.000621186	NA
Q8QZY1	P18-CTX_H2B	-0.638973	0.16575	21.7522	0.000872436	0.00167315	NA
Q8R001	P18-CTX_H2B	1.9923	0.112208	22.3484	1.14792e-14	5.5469e-13	NA
Q8R010	P18-CTX_H2B	-1.4484	0.366188	10.3484	0.00253269	0.00443303	NA
Q8R050	P18-CTX_H2B	0.718358	0.179416	22.3484	0.00058281	0.00115537	NA
Q8R071	P18-CTX_H2B	-0.657333	0.209833	21.4189	0.00494792	0.00813431	NA
Q8R081	P18-CTX_H2B	-3.57547	0.171075	21.4799	9.24322e-16	1.08748e-13	NA
Q8R0A7	P18-CTX_H2B	1.19108	0.153683	21.441	1.18505e-07	5.05e-07	NA
Q8R0F8	P18-CTX_H2B	-0.821249	0.290941	20.3944	0.0103846	0.0159845	NA
Q8R0J7	P18-CTX_H2B	0.794782	0.251729	22.3484	0.00450973	0.00747055	NA
Q8R0S2	P18-CTX_H2B	1.46574	0.142119	21.463	8.93347e-10	6.48096e-09	NA
Q8R0S4	P18-CTX_H2B	-0.354089	0.204965	20.3875	0.0991877	0.125951	NA
Q8R0Y6	P18-CTX_H2B	-0.856488	0.14937	21.65	9.66024e-06	2.73152e-05	NA
Q8R105	P18-CTX_H2B	2.69341	0.240277	22.3484	1.20387e-10	1.10805e-09	NA
Q8R123	P18-CTX_H2B	0.386802	0.223455	19.3484	0.099368	0.126121	NA
Q8R127	P18-CTX_H2B	0.509231	0.161171	21.6117	0.00461249	0.00761524	NA
Q8R151	P18-CTX_H2B	0.258793	0.147979	20.3484	0.0953866	0.121466	NA
Q8R164	P18-CTX_H2B	-0.646181	0.196794	21.4936	0.00346642	0.00589205	NA
Q8R191	P18-CTX_H2B	2.06249	0.329433	22.3484	2.48138e-06	7.96514e-06	NA
Q8R1A4	P18-CTX_H2B	0.958402	0.153591	22.3484	2.60424e-06	8.32004e-06	NA
Q8R1Q8	P18-CTX_H2B	1.46596	0.14823	22.3484	1.26017e-09	8.85723e-09	NA
Q8R1R3	P18-CTX_H2B	1.33345	0.208447	22.3484	1.8093e-06	5.92015e-06	NA
Q8R1X6	P18-CTX_H2B	-0.186286	0.276782	19.3484	0.508881	0.549939	NA
Q8R2R9	P18-CTX_H2B	0.321736	0.207319	21.565	0.135241	0.167107	NA
Q8R2U0	P18-CTX_H2B	-0.463074	0.118622	21.4512	0.000791741	0.00152923	NA
Q8R2Y0	P18-CTX_H2B	-0.725171	0.228738	21.5392	0.00451104	0.00747055	NA
Q8R2Y8	P18-CTX_H2B	-0.995596	0.31449	16.3484	0.00586757	0.00948485	NA
Q8R307	P18-CTX_H2B	1.14888	0.146971	22.3484	7.76127e-08	3.45428e-07	NA
Q8R313	P18-CTX_H2B	1.28529	0.288771	22.3484	0.000194102	0.00042188	NA
Q8R326	P18-CTX_H2B	-4.48029	0.283522	21.5896	2.40162e-13	6.69979e-12	NA
Q8R361	P18-CTX_H2B	-0.4598	0.116645	21.3969	0.000725146	0.00141474	NA
Q8R366	P18-CTX_H2B	-0.291922	0.247842	21.5236	0.251713	0.292584	NA
Q8R3Q2	P18-CTX_H2B	2.01289	0.16176	22.3484	1.58973e-11	1.91192e-10	NA
Q8R3S6	P18-CTX_H2B	0.877975	0.129741	22.3484	7.76601e-07	2.7363e-06	NA
Q8R3V5	P18-CTX_H2B	2.62948	0.140861	21.696	7.51451e-15	3.91044e-13	NA
Q8R3Z5	P18-CTX_H2B	1.32252	0.197939	22.3484	9.43109e-07	3.26767e-06	NA
Q8R404	P18-CTX_H2B	-1.25247	0.339844	19.3687	0.00153063	0.00279102	NA
Q8R464	P18-CTX_H2B	-0.334008	0.168626	21.5096	0.0605482	0.0801582	NA
Q8R4H2	P18-CTX_H2B	1.32452	0.146859	22.3484	6.65061e-09	3.82905e-08	NA
Q8R4U7	P18-CTX_H2B	0.800004	0.210564	21.9927	0.00098312	0.00186491	NA
Q8R550	P18-CTX_H2B	-0.406333	0.195783	21.6249	0.0500538	0.0673859	NA
Q8R554	P18-CTX_H2B	1.14934	0.291353	22.3484	0.000673581	0.00131985	NA
Q8R570	P18-CTX_H2B	-0.165545	0.251218	21.967	0.516764	0.557117	NA
Q8R574	P18-CTX_H2B	0.292588	0.183248	22.3484	0.124382	0.154891	NA
Q8R5C5	P18-CTX_H2B	-0.090866	0.396246	19.4296	0.821019	0.842502	NA
Q8R5H1	P18-CTX_H2B	1.10017	0.179208	21.9467	3.56499e-06	1.10809e-05	NA
Q8R5H6	P18-CTX_H2B	1.38743	0.139461	21.6999	1.52395e-09	1.04665e-08	NA
Q8R5J9	P18-CTX_H2B	0.105537	0.327977	22.3484	0.750608	0.778813	NA
Q8R5L3	P18-CTX_H2B	0.30066	0.218354	10.3484	0.197587	0.235433	NA
Q8R5M8	P18-CTX_H2B	0.233298	0.23461	17.3741	0.333673	0.377317	NA
Q8VBT0	P18-CTX_H2B	-0.442221	0.148034	22.3484	0.0067166	0.0107291	NA
Q8VBT9	P18-CTX_H2B	0.0676176	0.27283	11.3484	0.808687	0.831739	NA
Q8VBV7	P18-CTX_H2B	-0.762455	0.298639	22.3484	0.018002	0.0262747	NA
Q8VBY2	P18-CTX_H2B	0.373444	0.178308	21.665	0.0481489	0.0652433	NA
Q8VBZ3	P18-CTX_H2B	-0.149392	0.153945	21.5833	0.342584	0.386264	NA
Q8VC30	P18-CTX_H2B	0.335245	0.20705	22.3484	0.119441	0.149911	NA
Q8VCC9	P18-CTX_H2B	-0.800321	0.195663	21.9549	0.000485582	0.000975489	NA
Q8VCD6	P18-CTX_H2B	-0.486349	0.187224	22.3484	0.0163088	0.0240499	NA
Q8VCH8	P18-CTX_H2B	0.0130951	0.118042	22.3484	0.912658	0.921168	NA
Q8VCT3	P18-CTX_H2B	0.757432	0.135241	21.569	1.33856e-05	3.64036e-05	NA
Q8VD04	P18-CTX_H2B	1.78539	0.136078	22.3484	5.58189e-12	7.82622e-11	NA
Q8VD37	P18-CTX_H2B	1.48634	0.215357	21.524	7.04557e-07	2.50894e-06	NA
Q8VD62	P18-CTX_H2B	0.0322722	0.165631	21.5592	0.84734	0.86477	NA
Q8VD65	P18-CTX_H2B	0.995931	0.0961346	21.4055	8.47944e-10	6.21826e-09	NA
Q8VD75	P18-CTX_H2B	0.906376	0.128826	22.3484	4.24955e-07	1.60381e-06	NA
Q8VDD5	P18-CTX_H2B	0.408695	0.161995	21.5704	0.0195402	0.0283365	NA
Q8VDD8	P18-CTX_H2B	0.0905924	0.293268	10.3484	0.763522	0.791	NA
Q8VDJ3	P18-CTX_H2B	-0.456769	0.135488	21.558	0.00281016	0.00486519	NA
Q8VDM4	P18-CTX_H2B	-0.796177	0.185336	21.7189	0.000300169	0.00062917	NA
Q8VDM6	P18-CTX_H2B	-3.69743	0.143199	21.4048	1.2822e-17	1.11528e-14	NA
Q8VDN2	P18-CTX_H2B	-0.266595	0.262442	21.4646	0.321028	0.364848	NA
Q8VDP4	P18-CTX_H2B	-3.78673	0.233374	21.6134	1.38698e-13	4.07953e-12	NA
Q8VDQ1	P18-CTX_H2B	0.130353	0.283743	22.3484	0.65038	0.688817	NA
Q8VDQ8	P18-CTX_H2B	0.683672	0.326691	21.6605	0.0483139	0.0654342	NA
Q8VDU5	P18-CTX_H2B	0.832573	0.233279	21.6842	0.00174413	0.00315272	NA
Q8VDZ4	P18-CTX_H2B	2.25183	0.216456	22.3484	4.93519e-10	3.86003e-09	NA
Q8VE11	P18-CTX_H2B	0.317156	0.464124	10.3484	0.509401	0.550275	NA
Q8VE18	P18-CTX_H2B	0.143784	0.167617	22.3484	0.4001	0.444811	NA
Q8VE22	P18-CTX_H2B	-1.45183	0.293597	20.3484	7.43946e-05	0.000175665	NA
Q8VE33	P18-CTX_H2B	0.683577	0.17759	21.9286	0.000874719	0.00167634	NA
Q8VE47	P18-CTX_H2B	1.4217	0.209015	22.3484	7.17895e-07	2.54938e-06	NA
Q8VE62	P18-CTX_H2B	1.98744	0.356426	21.3484	1.47069e-05	3.95987e-05	NA
Q8VEH3	P18-CTX_H2B	0.218078	0.137099	21.9465	0.12599	0.156533	NA
Q8VEH5	P18-CTX_H2B	-0.585696	0.155954	22.3484	0.00107005	0.00201359	NA
Q8VEJ9	P18-CTX_H2B	-0.00589381	0.209484	22.3484	0.977804	0.980704	NA
Q8VEK3	P18-CTX_H2B	-2.97387	0.178452	21.5085	8.89373e-14	2.73482e-12	NA
Q8VEM8	P18-CTX_H2B	-0.544245	0.25336	21.4999	0.0432448	0.0591909	NA
Q8VH51	P18-CTX_H2B	-2.3712	0.151066	21.5805	2.76626e-13	7.41138e-12	NA
Q8VHE0	P18-CTX_H2B	-1.1084	0.251144	21.3484	0.000233728	0.000496833	NA
Q8VHH5	P18-CTX_H2B	2.71944	0.194997	22.3484	1.64537e-12	2.91005e-11	NA
Q8VHI6	P18-CTX_H2B	0.8418	0.157335	21.5705	2.41386e-05	6.31102e-05	NA
Q8VHJ5	P18-CTX_H2B	0.988179	0.133736	21.7569	2.30464e-07	9.28029e-07	NA
Q8VHL1	P18-CTX_H2B	0.719558	0.224592	19.4737	0.00456766	0.00755969	NA
Q8VHR5	P18-CTX_H2B	-3.38483	0.248485	21.8265	3.79013e-12	5.89431e-11	NA
Q8VHW2	P18-CTX_H2B	0.537155	0.427148	21.3484	0.222141	0.261014	NA
Q8VIJ6	P18-CTX_H2B	-3.70173	0.150157	21.4387	3.21147e-17	1.44837e-14	NA
Q8VIM9	P18-CTX_H2B	0.410758	0.15435	22.3484	0.0141525	0.0211233	NA
Q8WTY4	P18-CTX_H2B	1.70906	0.185421	22.3484	4.5164e-09	2.70384e-08	NA
Q91V09	P18-CTX_H2B	-0.0726914	0.186279	21.615	0.700187	0.734098	NA
Q91V12	P18-CTX_H2B	0.198088	0.166754	21.6756	0.247725	0.288072	NA
Q91V14	P18-CTX_H2B	-1.41146	0.298949	21.5151	0.000109375	0.000248922	NA
Q91V36	P18-CTX_H2B	1.19282	0.210711	22.3484	1.02085e-05	2.86261e-05	NA
Q91V41	P18-CTX_H2B	0.0137354	0.181931	21.6753	0.940511	0.946809	NA
Q91V57	P18-CTX_H2B	0.845095	0.146365	22.3484	7.79846e-06	2.24257e-05	NA
Q91V61	P18-CTX_H2B	-0.874948	0.146925	21.3933	6.06608e-06	1.79987e-05	NA
Q91V92	P18-CTX_H2B	1.0951	0.119552	22.0088	5.78942e-09	3.37633e-08	NA
Q91VD9	P18-CTX_H2B	-0.849108	0.162908	21.4726	3.39828e-05	8.60221e-05	NA
Q91VE0	P18-CTX_H2B	-0.395969	0.199851	22.3484	0.0599899	0.079458	NA
Q91VF2	P18-CTX_H2B	0.354226	0.325273	21.73	0.288078	0.330874	NA
Q91VH1	P18-CTX_H2B	-0.734936	0.40122	9.34843	0.0989801	0.125806	NA
Q91VI7	P18-CTX_H2B	1.08746	0.181044	22.3484	4.49652e-06	1.36255e-05	NA
Q91VK4	P18-CTX_H2B	-0.346078	0.340828	18.4248	0.323064	0.366439	NA
Q91VM5	P18-CTX_H2B	-3.8282	0.282471	21.6834	4.62754e-12	6.84269e-11	NA
Q91VN4	P18-CTX_H2B	-0.42063	0.125237	21.4526	0.00290944	0.00501781	NA
Q91VR2	P18-CTX_H2B	-1.03481	0.327555	21.6372	0.00461191	0.00761524	NA
Q91VR5	P18-CTX_H2B	-1.7766	0.186307	21.569	3.43477e-09	2.13666e-08	NA
Q91VR7	P18-CTX_H2B	-0.67187	0.365072	20.3484	0.0803452	0.10358	NA
Q91VR8	P18-CTX_H2B	-1.06374	0.189731	21.523	1.33018e-05	3.62118e-05	NA
Q91VW3	P18-CTX_H2B	0.854291	0.429312	10.3484	0.0736711	0.0957512	NA
Q91VX2	P18-CTX_H2B	-1.17644	0.263714	22.3484	0.00018932	0.000412812	NA
Q91VZ6	P18-CTX_H2B	0.497811	0.103696	21.402	9.15934e-05	0.000211297	NA
Q91W18	P18-CTX_H2B	-0.978899	0.234257	22.3484	0.000379253	0.000775119	NA
Q91W39	P18-CTX_H2B	-4.33602	0.370292	21.8176	7.06117e-11	6.82412e-10	NA
Q91W50	P18-CTX_H2B	0.976133	0.117321	22.3484	2.71105e-08	1.31944e-07	NA
Q91W86	P18-CTX_H2B	1.0082	0.219981	22.3484	0.000140209	0.000313557	NA
Q91W89	P18-CTX_H2B	0.435144	0.135682	21.4902	0.00414766	0.00692812	NA
Q91WC3	P18-CTX_H2B	-0.60298	0.132932	21.4061	0.000172962	0.000379898	NA
Q91WD5	P18-CTX_H2B	-0.645291	0.315632	21.7174	0.0532205	0.0712239	NA
Q91WE4	P18-CTX_H2B	-0.708729	0.25695	22.3484	0.0113705	0.0173736	NA
Q91WG4	P18-CTX_H2B	0.801692	0.454541	10.3484	0.107227	0.135334	NA
Q91WJ8	P18-CTX_H2B	-4.82876	0.203913	21.4982	6.88221e-17	2.06925e-14	NA
Q91WK0	P18-CTX_H2B	2.37234	0.262383	13.3484	4.65646e-07	1.73798e-06	NA
Q91WK2	P18-CTX_H2B	-0.538602	0.179235	22.3484	0.00644552	0.0103388	NA
Q91WL8	P18-CTX_H2B	0.144515	0.284077	10.3484	0.621619	0.661984	NA
Q91WQ3	P18-CTX_H2B	-0.497784	0.154093	21.6887	0.00389506	0.00655068	NA
Q91WS0	P18-CTX_H2B	-0.52278	0.189788	21.4511	0.0117334	0.0178233	NA
Q91X78	P18-CTX_H2B	-0.955597	0.264015	21.7644	0.00153846	0.00280342	NA
Q91X97	P18-CTX_H2B	1.02568	0.162112	21.7548	2.40914e-06	7.76088e-06	NA
Q91XD6	P18-CTX_H2B	0.934441	0.159092	22.3484	6.15523e-06	1.82033e-05	NA
Q91XL9	P18-CTX_H2B	-0.15808	0.214262	21.5782	0.468592	0.511914	NA
Q91XM9	P18-CTX_H2B	0.364704	0.143321	21.4727	0.0186705	0.0271548	NA
Q91XU3	P18-CTX_H2B	0.522956	0.216551	21.5203	0.0247045	0.03524	NA
Q91XV3	P18-CTX_H2B	-0.21843	0.159302	21.5654	0.184423	0.221111	NA
Q91Y86	P18-CTX_H2B	0.615009	0.124459	22.3484	5.82145e-05	0.000141028	NA
Q91YD9	P18-CTX_H2B	-0.595307	0.166951	21.4651	0.0017788	0.00320896	NA
Q91YE6	P18-CTX_H2B	1.4203	0.154751	22.3484	4.87413e-09	2.89366e-08	NA
Q91YE7	P18-CTX_H2B	-4.02385	0.316797	10.3484	1.21212e-07	5.14914e-07	NA
Q91YI0	P18-CTX_H2B	0.978243	0.941246	21.3484	0.310291	0.353387	NA
Q91YJ2	P18-CTX_H2B	0.954278	0.225007	22.3484	0.000325306	0.000674025	NA
[truncated: 710 more rows]

## Sheet: uniprot_mapped_proteinID
Entry	Entry name	Status	Protein names	Gene names	Organism	Length	Gene ontology (cellular component)
A2A5R2	BIG2_MOUSE	reviewed	Brefeldin A-inhibited guanine nucleotide-exchange protein 2 (Brefeldin A-inhibited GEP 2) (ADP-ribosylation factor guanine nucleotide-exchange factor 2)	Arfgef2 Arfgep2 Big2	Mus musculus (Mouse)	1792	asymmetric synapse [GO:0032279]; axonemal microtubule [GO:0005879]; cytoplasm [GO:0005737]; cytoplasmic vesicle [GO:0031410]; cytosol [GO:0005829]; dendritic spine [GO:0043197]; Golgi apparatus [GO:0005794]; Golgi membrane [GO:0000139]; intracellular membrane-bounded organelle [GO:0043231]; membrane [GO:0016020]; microtubule organizing center [GO:0005815]; perinuclear region of cytoplasm [GO:0048…
A2A690	TANC2_MOUSE	reviewed	Protein TANC2 (Tetratricopeptide repeat, ankyrin repeat and coiled-coil domain-containing protein 2)	Tanc2 Kiaa1148	Mus musculus (Mouse)	1994	axon [GO:0030424]; dendritic spine [GO:0043197]; glutamatergic synapse [GO:0098978]; postsynaptic density, intracellular component [GO:0099092]
A2A699	F1712_MOUSE	reviewed	Protein FAM171A2	Fam171a2	Mus musculus (Mouse)	822	integral component of membrane [GO:0016021]
A2A8L1	CHD5_MOUSE	reviewed	Chromodomain-helicase-DNA-binding protein 5 (CHD-5) (EC 3.6.4.12) (ATP-dependent helicase CHD5)	Chd5 Kiaa0444	Mus musculus (Mouse)	1946	cytosol [GO:0005829]; heterochromatin [GO:0000792]; nuclear speck [GO:0016607]; nucleoplasm [GO:0005654]; nucleus [GO:0005634]; NuRD complex [GO:0016581]
A2A8L5	PTPRF_MOUSE	reviewed	Receptor-type tyrosine-protein phosphatase F (EC 3.1.3.48) (Leukocyte common antigen related) (LAR)	Ptprf Lar	Mus musculus (Mouse)	1898	endosome [GO:0005768]; excitatory synapse [GO:0060076]; growth cone [GO:0030426]; integral component of postsynaptic density membrane [GO:0099061]; intracellular membrane-bounded organelle [GO:0043231]; membrane [GO:0016020]; neuronal cell body [GO:0043025]; neuron projection [GO:0043005]; plasma membrane [GO:0005886]
A2A8Z1	OSBL9_MOUSE	reviewed	Oxysterol-binding protein-related protein 9 (ORP-9) (OSBP-related protein 9)	Osbpl9 Orp9	Mus musculus (Mouse)	736	cytosol [GO:0005829]; Golgi apparatus [GO:0005794]; intracellular membrane-bounded organelle [GO:0043231]; late endosome membrane [GO:0031902]; membrane [GO:0016020]
A2AAE1	K1109_MOUSE	reviewed	Transmembrane protein KIAA1109 (Fragile site-associated protein homolog)	Kiaa1109 Fsa Kiaa1371	Mus musculus (Mouse)	5005	integral component of membrane [GO:0016021]; nucleus [GO:0005634]; presynapse [GO:0098793]
A2AAY5	SPD2B_MOUSE	reviewed	SH3 and PX domain-containing protein 2B (Factor for adipocyte differentiation 49) (Tyrosine kinase substrate with four SH3 domains)	Sh3pxd2b Fad49 Tks4	Mus musculus (Mouse)	908	cell junction [GO:0030054]; cell projection [GO:0042995]; cytoplasm [GO:0005737]; podosome [GO:0002102]
A2ACJ2	FP100_MOUSE	reviewed	Fanconi anemia core complex-associated protein 100 (Fanconi anemia-associated protein of 100 kDa)	Faap100	Mus musculus (Mouse)	879	cytosol [GO:0005829]; Fanconi anaemia nuclear complex [GO:0043240]; nucleoplasm [GO:0005654]
A2ADY9	DDI2_MOUSE	reviewed	Protein DDI1 homolog 2 (EC 3.4.23.-)	Ddi2	Mus musculus (Mouse)	399	chromosome [GO:0005694]; cytosol [GO:0005829]; nucleoplasm [GO:0005654]
A2AFR3	FRPD4_MOUSE	reviewed	FERM and PDZ domain-containing protein 4 (PDZ domain-containing protein 10) (PSD-95-interacting regulator of spine morphogenesis) (Preso)	Frmpd4 Gm196 Kiaa0316 Pdzd10 Pdzk10	Mus musculus (Mouse)	1320	cytoskeleton [GO:0005856]; dendritic spine [GO:0043197]; glutamatergic synapse [GO:0098978]; postsynaptic density [GO:0014069]; protein-containing complex [GO:0032991]
A2AG50	MA7D2_MOUSE	reviewed	MAP7 domain-containing protein 2	Map7d2 Mtap7d2	Mus musculus (Mouse)	781	microtubule cytoskeleton [GO:0015630]
A2AGT5	CKAP5_MOUSE	reviewed	Cytoskeleton-associated protein 5	Ckap5	Mus musculus (Mouse)	2032	centrosome [GO:0005813]; cytoplasm [GO:0005737]; dendrite [GO:0030425]; kinetochore [GO:0000776]; neuronal ribonucleoprotein granule [GO:0071598]; nucleolus [GO:0005730]; perikaryon [GO:0043204]; plasma membrane [GO:0005886]; postsynapse [GO:0098794]; protein-containing complex [GO:0032991]; spindle pole [GO:0000922]
A2AHC3	CAMP1_MOUSE	reviewed	Calmodulin-regulated spectrin-associated protein 1	Camsap1	Mus musculus (Mouse)	1581	cytoplasm [GO:0005737]; microtubule [GO:0005874]
A2AJA9	AJM1_MOUSE	reviewed	Apical junction component 1 homolog	Ajm1 Gm996	Mus musculus (Mouse)	974	adherens junction [GO:0005912]; apical plasma membrane [GO:0016324]; cilium [GO:0005929]
A2AJI0	MA7D1_MOUSE	reviewed	MAP7 domain-containing protein 1	Map7d1 Kiaa1187 Mtap7d1	Mus musculus (Mouse)	846	cytosol [GO:0005829]; microtubule cytoskeleton [GO:0015630]; spindle [GO:0005819]
A2ALS5	RPGP1_MOUSE	reviewed	Rap1 GTPase-activating protein 1 (Rap1GAP) (Rap1GAP1) (ARPP-90)	Rap1gap Kiaa0474 Rap1ga1	Mus musculus (Mouse)	663	axon [GO:0030424]; cytoplasm [GO:0005737]; cytosol [GO:0005829]; dendrite [GO:0030425]; early endosome [GO:0005769]; Golgi membrane [GO:0000139]; membrane [GO:0016020]; neuronal cell body [GO:0043025]
A2ALU4	SHRM2_MOUSE	reviewed	Protein Shroom2 (Protein Apxl)	Shroom2 Apxl	Mus musculus (Mouse)	1481	adherens junction [GO:0005912]; apical junction complex [GO:0043296]; apical plasma membrane [GO:0016324]; bicellular tight junction [GO:0005923]; cell-cell junction [GO:0005911]; cell cortex [GO:0005938]; cytoplasm [GO:0005737]; cytoskeleton [GO:0005856]; microtubule [GO:0005874]; neuronal cell body [GO:0043025]; plasma membrane [GO:0005886]
A2AN08	UBR4_MOUSE	reviewed	E3 ubiquitin-protein ligase UBR4 (EC 2.3.2.27) (N-recognin-4) (RING-type E3 ubiquitin transferase UBR4) (Zinc finger UBR1-type protein 1) (p600)	Ubr4 Kiaa0462 Zubr1	Mus musculus (Mouse)	5180	centrosome [GO:0005813]; cytosol [GO:0005829]; integral component of membrane [GO:0016021]; nucleoplasm [GO:0005654]
A2AP18	PLCH2_MOUSE	reviewed	1-phosphatidylinositol 4,5-bisphosphate phosphodiesterase eta-2 (EC 3.1.4.11) (Phosphoinositide phospholipase C-eta-2) (Phosphoinositide phospholipase C-like 4) (PLC-L4) (Phospholipase C-like protein 4) (Phospholipase C-eta-2) (PLC-eta2)	Plch2 Plcl4	Mus musculus (Mouse)	1501	cytoplasm [GO:0005737]; plasma membrane [GO:0005886]
A2APV2	FMNL2_MOUSE	reviewed	Formin-like protein 2 (Protein Man)	Fmnl2 Kiaa1902 Man	Mus musculus (Mouse)	1086	cytosol [GO:0005829]
A2AQ19	RTF1_MOUSE	reviewed	RNA polymerase-associated protein RTF1 homolog	Rtf1	Mus musculus (Mouse)	715	Cdc73/Paf1 complex [GO:0016593]; nucleolus [GO:0005730]
A2AQ25	SKT_MOUSE	reviewed	Sickle tail protein (Enhancer trap locus 4)	Skt Etl4 Kiaa1217	Mus musculus (Mouse)	1946	cytoplasm [GO:0005737]
A2AR50	RGPS1_MOUSE	reviewed	Ras-specific guanine nucleotide-releasing factor RalGPS1 (Ral GEF with PH domain and SH3-binding motif 1) (Ral guanine nucleotide exchange factor 2) (RalGEF 2) (RalA exchange factor RalGPS1)	Ralgps1 Kiaa0351 Ralgef2 Ralgps1a	Mus musculus (Mouse)	585	cytoplasm [GO:0005737]; plasma membrane [GO:0005886]
A2ARP1	VIP1_MOUSE	reviewed	Inositol hexakisphosphate and diphosphoinositol-pentakisphosphate kinase 1 (EC 2.7.4.21) (EC 2.7.4.24) (Diphosphoinositol pentakisphosphate kinase 1) (Histidine acid phosphatase domain-containing protein 2A) (InsP6 and PP-IP5 kinase 1) (VIP1 homolog)	Ppip5k1 Hisppd2a Kiaa0377 Vip1	Mus musculus (Mouse)	1436	cytosol [GO:0005829]; plasma membrane [GO:0005886]
A2AWA9	RBGP1_MOUSE	reviewed	Rab GTPase-activating protein 1 (GAP and centrosome-associated protein) (Rab6 GTPase-activating protein GAPCenA)	Rabgap1 Kiaa4104	Mus musculus (Mouse)	1064	cytosol [GO:0005829]; microtubule organizing center [GO:0005815]
A2BH40	ARI1A_MOUSE	reviewed	AT-rich interactive domain-containing protein 1A (ARID domain-containing protein 1A) (BRG1-associated factor 250) (BAF250) (BRG1-associated factor 250a) (BAF250A) (Osa homolog 1) (SWI-like protein) (SWI/SNF complex protein p270) (SWI/SNF-related, matrix-associated, actin-dependent regulator of chromatin subfamily F member 1)	Arid1a Baf250 Baf250a Osa1 Smarcf1	Mus musculus (Mouse)	2283	brahma complex [GO:0035060]; chromatin [GO:0000785]; nBAF complex [GO:0071565]; npBAF complex [GO:0071564]; nucleoplasm [GO:0005654]; SWI/SNF complex [GO:0016514]
A2CG49	KALRN_MOUSE	reviewed	Kalirin (EC 2.7.11.1) (Protein Duo) (Serine/threonine-protein kinase with Dbl- and pleckstrin homology domain)	Kalrn	Mus musculus (Mouse)	2964	cytoskeleton [GO:0005856]; cytosol [GO:0005829]; glutamatergic synapse [GO:0098978]; neuronal cell body [GO:0043025]; neuron projection [GO:0043005]; nucleoplasm [GO:0005654]; perinuclear region of cytoplasm [GO:0048471]; postsynaptic density [GO:0014069]; presynapse [GO:0098793]
A2RSJ4	UH1BL_MOUSE	reviewed	UHRF1-binding protein 1-like (Syntaxin-6 Habc-interacting protein of 164 kDa)	Uhrf1bp1l Kiaa0701 Ship164	Mus musculus (Mouse)	1457	cytosol [GO:0005829]; early endosome [GO:0005769]
A2RT62	FXL16_MOUSE	reviewed	F-box/LRR-repeat protein 16 (F-box and leucine-rich repeat protein 16)	Fbxl16	Mus musculus (Mouse)	479	cytoplasm [GO:0005737]; SCF ubiquitin ligase complex [GO:0019005]
A2TJV2	PALM3_MOUSE	reviewed	Paralemmin-3	Palm3	Mus musculus (Mouse)	734	cytoplasm [GO:0005737]; plasma membrane [GO:0005886]
A6H630	ARMT1_MOUSE	reviewed	Damage-control phosphatase ARMT1 (EC 3.1.3.-) (Acidic residue methyltransferase 1) (Protein-glutamate O-methyltransferase) (EC 2.1.1.-) (Sugar phosphate phosphatase ARMT1)	Armt1	Mus musculus (Mouse)	439
A6H6A9	RBG1L_MOUSE	reviewed	Rab GTPase-activating protein 1-like	Rabgap1l Hhl Kiaa0471	Mus musculus (Mouse)	815	early endosome [GO:0005769]; Golgi apparatus [GO:0005794]; nucleus [GO:0005634]
B0V2N1	PTPRS_MOUSE	reviewed	Receptor-type tyrosine-protein phosphatase S (R-PTP-S) (EC 3.1.3.48) (PTPNU-3) (Receptor-type tyrosine-protein phosphatase sigma) (R-PTP-sigma)	Ptprs	Mus musculus (Mouse)	1907	axon [GO:0030424]; cytosol [GO:0005829]; glutamatergic synapse [GO:0098978]; growth cone [GO:0030426]; integral component of postsynaptic density membrane [GO:0099061]; integral component of presynaptic membrane [GO:0099056]; integral component of synaptic vesicle membrane [GO:0030285]; perikaryon [GO:0043204]; plasma membrane [GO:0005886]; Schaffer collateral - CA1 synapse [GO:0098685]
B1AWN6	SCN2A_MOUSE	reviewed	Sodium channel protein type 2 subunit alpha (Voltage-gated sodium channel subunit alpha Nav1.2)	Scn2a Scn2a1	Mus musculus (Mouse)	2006	axon [GO:0030424]; axon initial segment [GO:0043194]; glutamatergic synapse [GO:0098978]; integral component of presynaptic membrane [GO:0099056]; intercalated disc [GO:0014704]; intrinsic component of plasma membrane [GO:0031226]; membrane [GO:0016020]; neuron projection [GO:0043005]; node of Ranvier [GO:0033268]; paranode region of axon [GO:0033270]; plasma membrane [GO:0005886]; sodium channel…
B1AY13	UBP24_MOUSE	reviewed	Ubiquitin carboxyl-terminal hydrolase 24 (EC 3.4.19.12) (Deubiquitinating enzyme 24) (Ubiquitin thioesterase 24) (Ubiquitin-specific-processing protease 24)	Usp24	Mus musculus (Mouse)	2617	cytosol [GO:0005829]; nucleus [GO:0005634]
B1AZP2	DLGP4_MOUSE	reviewed	Disks large-associated protein 4 (DAP-4) (PSD-95/SAP90-binding protein 4) (SAP90/PSD-95-associated protein 4) (SAPAP-4)	Dlgap4 Kiaa0964 Sapap4	Mus musculus (Mouse)	992	cholinergic synapse [GO:0098981]; dendrite [GO:0030425]; glutamatergic synapse [GO:0098978]; neuromuscular junction [GO:0031594]; neuronal cell body [GO:0043025]; plasma membrane [GO:0005886]; postsynaptic specialization [GO:0099572]; synapse [GO:0045202]
B2RQC6	PYR1_MOUSE	reviewed	CAD protein [Includes: Glutamine-dependent carbamoyl-phosphate synthase (EC 6.3.5.5); Aspartate carbamoyltransferase (EC 2.1.3.2); Dihydroorotase (EC 3.5.2.3)]	Cad	Mus musculus (Mouse)	2225	cell projection [GO:0042995]; cytoplasm [GO:0005737]; cytosol [GO:0005829]; neuronal cell body [GO:0043025]; nuclear matrix [GO:0016363]; nucleoplasm [GO:0005654]; nucleus [GO:0005634]; protein-containing complex [GO:0032991]; terminal bouton [GO:0043195]
B2RR83	YTDC2_MOUSE	reviewed	3'-5' RNA helicase YTHDC2 (EC 3.6.4.13) (Keen to exit meiosis leaving testes under-populated protein) (Ketu) (YTH domain-containing protein C2) (mYTHDC2)	Ythdc2	Mus musculus (Mouse)	1445	cytoplasm [GO:0005737]; endoplasmic reticulum [GO:0005783]; nucleus [GO:0005634]; perinuclear region of cytoplasm [GO:0048471]; ribonucleoprotein granule [GO:0035770]
B2RRE7	OTUD4_MOUSE	reviewed	OTU domain-containing protein 4 (EC 3.4.19.12)	Otud4 Kiaa1046	Mus musculus (Mouse)	1107	cytosol [GO:0005829]; nucleus [GO:0005634]
B2RSH2	GNAI1_MOUSE	reviewed	Guanine nucleotide-binding protein G(i) subunit alpha-1 (Adenylate cyclase-inhibiting G alpha protein)	Gnai1 Gnai-1	Mus musculus (Mouse)	354	cell cortex region [GO:0099738]; centrosome [GO:0005813]; cytoplasm [GO:0005737]; heterotrimeric G-protein complex [GO:0005834]; membrane [GO:0016020]; membrane raft [GO:0045121]; midbody [GO:0030496]; nucleus [GO:0005634]; plasma membrane [GO:0005886]; protein-containing complex [GO:0032991]
B2RUJ5	APBA1_MOUSE	reviewed	Amyloid-beta A4 precursor protein-binding family A member 1 (Adapter protein X11alpha) (Neuron-specific X11 protein) (Neuronal Munc18-1-interacting protein 1) (Mint-1)	Apba1 Mint1 mLin-10 X11	Mus musculus (Mouse)	842	cytoplasm [GO:0005737]; cytosol [GO:0005829]; dendritic spine [GO:0043197]; glutamatergic synapse [GO:0098978]; Golgi apparatus [GO:0005794]; membrane [GO:0016020]; nucleus [GO:0005634]; perinuclear region of cytoplasm [GO:0048471]; plasma membrane [GO:0005886]; presynaptic active zone membrane [GO:0048787]; protein-containing complex [GO:0032991]; Schaffer collateral - CA1 synapse [GO:0098685]; …
B2RXC1	TPC11_MOUSE	reviewed	Trafficking protein particle complex subunit 11	Trappc11	Mus musculus (Mouse)	1133	Golgi apparatus [GO:0005794]; TRAPP complex [GO:0030008]
B9EHT4	CLIP3_MOUSE	reviewed	CAP-Gly domain-containing linker protein 3 (Cytoplasmic linker protein 170-related 59 kDa protein) (CLIP-170-related 59 kDa protein) (CLIPR-59)	Clip3 Clipr59	Mus musculus (Mouse)	547	cytoplasm [GO:0005737]; early endosome membrane [GO:0031901]; Golgi stack [GO:0005795]; membrane raft [GO:0045121]; microtubule plus-end [GO:0035371]; nucleus [GO:0005634]; plasma membrane [GO:0005886]; recycling endosome membrane [GO:0055038]; trans-Golgi network [GO:0005802]; trans-Golgi network membrane [GO:0032588]
B9EJ80	PDZD8_MOUSE	reviewed	PDZ domain-containing protein 8	Pdzd8	Mus musculus (Mouse)	1147	endoplasmic reticulum membrane [GO:0005789]; integral component of membrane [GO:0016021]; mitochondria-associated endoplasmic reticulum membrane [GO:0044233]; mitochondrion [GO:0005739]
B9EJ86	OSBL8_MOUSE	reviewed	Oxysterol-binding protein-related protein 8 (ORP-8) (OSBP-related protein 8)	Osbpl8 Kiaa1451 Orp8	Mus musculus (Mouse)	889	cortical endoplasmic reticulum [GO:0032541]; cytosol [GO:0005829]; endoplasmic reticulum [GO:0005783]; endoplasmic reticulum membrane [GO:0005789]; integral component of membrane [GO:0016021]; intracellular membrane-bounded organelle [GO:0043231]; membrane [GO:0016020]; nuclear membrane [GO:0031965]
B9EJA2	CTTB2_MOUSE	reviewed	Cortactin-binding protein 2 (CortBP2)	Cttnbp2 Kiaa1758	Mus musculus (Mouse)	1648	cell cortex [GO:0005938]; dendritic spine [GO:0043197]; glutamatergic synapse [GO:0098978]; postsynaptic actin cytoskeleton [GO:0098871]; synaptic vesicle [GO:0008021]
B9EKR1	PTPRZ_MOUSE	reviewed	Receptor-type tyrosine-protein phosphatase zeta (R-PTP-zeta) (EC 3.1.3.48)	Ptprz1	Mus musculus (Mouse)	2312	axon [GO:0030424]; cytoplasm [GO:0005737]; dendrite [GO:0030425]; dendritic spine [GO:0043197]; extracellular matrix [GO:0031012]; extracellular space [GO:0005615]; filopodium [GO:0030175]; glutamatergic synapse [GO:0098978]; growth cone [GO:0030426]; integral component of postsynaptic density membrane [GO:0099061]; intrinsic component of plasma membrane [GO:0031226]; lamellipodium [GO:0030027]; …
D3YVF0	AKAP5_MOUSE	reviewed	A-kinase anchor protein 5 (AKAP-5) (A-kinase anchor protein 150 kDa) (AKAP 150) (P150) (cAMP-dependent protein kinase regulatory subunit II high affinity-binding protein)	Akap5 Akap150	Mus musculus (Mouse)	745	asymmetric synapse [GO:0032279]; basolateral plasma membrane [GO:0016323]; cytoplasm [GO:0005737]; cytoplasmic side of plasma membrane [GO:0009898]; cytoskeleton [GO:0005856]; dendrite [GO:0030425]; dendrite membrane [GO:0032590]; dendritic shaft [GO:0043198]; dendritic spine [GO:0043197]; dendritic spine membrane [GO:0032591]; excitatory synapse [GO:0060076]; filopodium membrane [GO:0031527]; gl…
D3YXK2	SAFB1_MOUSE	reviewed	Scaffold attachment factor B1 (SAF-B1)	Safb Safb1	Mus musculus (Mouse)	937	midbody [GO:0030496]; nucleoplasm [GO:0005654]; nucleus [GO:0005634]
D3YZI9	PGBD5_MOUSE	reviewed	PiggyBac transposable element-derived protein 5 (EC 3.1.-.-) (PiggyBac transposase 5)	Pgbd5	Mus musculus (Mouse)	523	nucleoplasm [GO:0005654]; nucleus [GO:0005634]
D3YZP9	CCDC6_MOUSE	reviewed	Coiled-coil domain-containing protein 6	Ccdc6	Mus musculus (Mouse)	469	cytoskeleton [GO:0005856]; cytosol [GO:0005829]
D3YZU1	SHAN1_MOUSE	reviewed	SH3 and multiple ankyrin repeat domains protein 1 (Shank1)	Shank1	Mus musculus (Mouse)	2167	cytoplasm [GO:0005737]; dendrite [GO:0030425]; dendritic spine [GO:0043197]; excitatory synapse [GO:0060076]; glutamatergic synapse [GO:0098978]; membrane [GO:0016020]; neuron projection [GO:0043005]; plasma membrane [GO:0005886]; postsynaptic density [GO:0014069]; postsynaptic membrane [GO:0045211]; Schaffer collateral - CA1 synapse [GO:0098685]; synapse [GO:0045202]
D3Z7P3	GLSK_MOUSE	reviewed	Glutaminase kidney isoform, mitochondrial (GLS) (EC 3.5.1.2) [Cleaved into: Glutaminase kidney isoform, mitochondrial 68 kDa chain; Glutaminase kidney isoform, mitochondrial 65 kDa chain]	Gls Gls1 Kiaa0838	Mus musculus (Mouse)	674	cytosol [GO:0005829]; mitochondrial matrix [GO:0005759]; mitochondrion [GO:0005739]; synapse [GO:0045202]
E9PUL5	PRRT2_MOUSE	reviewed	Proline-rich transmembrane protein 2 (Dispanin subfamily B member 3) (DSPB3)	Prrt2	Mus musculus (Mouse)	346	axon terminus [GO:0043679]; dendritic spine [GO:0043197]; glutamatergic synapse [GO:0098978]; integral component of presynaptic membrane [GO:0099056]; membrane [GO:0016020]; neuron projection [GO:0043005]; plasma membrane [GO:0005886]; postsynaptic density membrane [GO:0098839]; presynapse [GO:0098793]; presynaptic membrane [GO:0042734]; synaptic vesicle [GO:0008021]; synaptic vesicle membrane [G…
E9PV86	MCTP1_MOUSE	reviewed	Multiple C2 and transmembrane domain-containing protein 1	Mctp1	Mus musculus (Mouse)	951	endoplasmic reticulum membrane [GO:0005789]; integral component of membrane [GO:0016021]; recycling endosome [GO:0055037]; synaptic vesicle membrane [GO:0030672]
E9PVA8	GCN1_MOUSE	reviewed	eIF-2-alpha kinase activator GCN1 (GCN1 eIF-2-alpha kinase activator homolog) (GCN1-like protein 1) (General control of amino-acid synthesis 1-like protein 1) (Translational activator GCN1)	Gcn1 Gcn1l1	Mus musculus (Mouse)	2671	cytosol [GO:0005829]; polysome [GO:0005844]
E9PXF8	MTMRD_MOUSE	reviewed	Myotubularin-related protein 13 (Inactive phosphatidylinositol 3-phosphatase 13) (SET-binding factor 2)	Sbf2	Mus musculus (Mouse)	1872	axon [GO:0030424]; cytosol [GO:0005829]; endosome membrane [GO:0010008]; membrane [GO:0016020]; perinuclear region of cytoplasm [GO:0048471]; vacuolar membrane [GO:0005774]
E9Q3L2	PI4KA_MOUSE	reviewed	Phosphatidylinositol 4-kinase alpha (PI4-kinase alpha) (PI4K-alpha) (PtdIns-4-kinase alpha) (EC 2.7.1.67)	Pi4ka Pik4 Pik4ca	Mus musculus (Mouse)	2105	cytoplasm [GO:0005737]; Golgi-associated vesicle membrane [GO:0030660]; membrane [GO:0016020]; plasma membrane [GO:0005886]
E9Q401	RYR2_MOUSE	reviewed	Ryanodine receptor 2 (RYR-2) (RyR2) (Cardiac muscle ryanodine receptor) (Cardiac muscle ryanodine receptor-calcium release channel) (Type 2 ryanodine receptor)	Ryr2	Mus musculus (Mouse)	4966	A band [GO:0031672]; calcium channel complex [GO:0034704]; cytoplasm [GO:0005737]; cytoplasmic vesicle membrane [GO:0030659]; endoplasmic reticulum [GO:0005783]; extrinsic component of cytoplasmic side of plasma membrane [GO:0031234]; integral component of membrane [GO:0016021]; membrane [GO:0016020]; neuron projection [GO:0043005]; nuclear envelope [GO:0005635]; plasma membrane [GO:0005886]; pro…
E9Q4N7	ARI1B_MOUSE	reviewed	AT-rich interactive domain-containing protein 1B (ARID domain-containing protein 1B) (BRG1-associated factor 250b) (BAF250B)	Arid1b Baf250b	Mus musculus (Mouse)	2244	brahma complex [GO:0035060]; cytoplasm [GO:0005737]; cytosol [GO:0005829]; nBAF complex [GO:0071565]; nucleoplasm [GO:0005654]; nucleus [GO:0005634]; plasma membrane [GO:0005886]; SWI/SNF complex [GO:0016514]; synapse [GO:0045202]
E9Q4S1	PDE8B_MOUSE	reviewed	High affinity cAMP-specific and IBMX-insensitive 3',5'-cyclic phosphodiesterase 8B (PDE8B) (EC 3.1.4.53) (Cell proliferation-inducing gene 22 protein)	Pde8b	Mus musculus (Mouse)	865
E9Q5C9	NOLC1_MOUSE	reviewed	Nucleolar and coiled-body phosphoprotein 1 (140 kDa nucleolar phosphoprotein) (Nopp140)	Nolc1 Kiaa0035	Mus musculus (Mouse)	702	box C/D RNP complex [GO:0031428]; box H/ACA snoRNP complex [GO:0031429]; Cajal body [GO:0015030]; cytoplasm [GO:0005737]; fibrillar center [GO:0001650]; nucleolus [GO:0005730]; nucleoplasm [GO:0005654]; small nuclear ribonucleoprotein complex [GO:0030532]
E9Q6P5	TTC7B_MOUSE	reviewed	Tetratricopeptide repeat protein 7B (TPR repeat protein 7B)	Ttc7b	Mus musculus (Mouse)	843	cytosol [GO:0005829]; plasma membrane [GO:0005886]
E9Q735	UBE4A_MOUSE	reviewed	Ubiquitin conjugation factor E4 A (EC 2.3.2.-)	Ube4a Ufd2b	Mus musculus (Mouse)	1028	cytoplasm [GO:0005737]; nucleus [GO:0005634]; ubiquitin ligase complex [GO:0000151]
E9Q7G0	NUMA1_MOUSE	reviewed	Nuclear mitotic apparatus protein 1 (Nuclear mitotic apparatus protein) (NuMA protein)	Numa1	Mus musculus (Mouse)	2094	cell cortex [GO:0005938]; cell cortex region [GO:0099738]; centrosome [GO:0005813]; chromosome [GO:0005694]; cortical microtubule [GO:0055028]; cytoplasmic microtubule bundle [GO:1905720]; cytosol [GO:0005829]; dendrite [GO:0030425]; extrinsic component of plasma membrane [GO:0019897]; Golgi membrane [GO:0000139]; lateral cell cortex [GO:0097575]; lateral plasma membrane [GO:0016328]; microtubule…
E9Q7X7	NRX2A_MOUSE	reviewed	Neurexin-2 (Neurexin II-alpha) (Neurexin-2-alpha)	Nrxn2	Mus musculus (Mouse)	1710	integral component of membrane [GO:0016021]; presynaptic membrane [GO:0042734]; protein-containing complex [GO:0032991]
E9Q8I9	FRY_MOUSE	reviewed	Protein furry homolog	Fry Kiaa4143	Mus musculus (Mouse)	3020	cell cortex [GO:0005938]; microtubule organizing center [GO:0005815]; site of polarized growth [GO:0030427]; spindle pole [GO:0000922]
E9QAT4	SC16A_MOUSE	reviewed	Protein transport protein Sec16A (SEC16 homolog A) (p250)	Sec16a Kiaa0310 Sec16	Mus musculus (Mouse)	2357	cytosol [GO:0005829]; endoplasmic reticulum [GO:0005783]; endoplasmic reticulum exit site [GO:0070971]; endoplasmic reticulum membrane [GO:0005789]; ER to Golgi transport vesicle membrane [GO:0012507]; Golgi apparatus [GO:0005794]; Golgi membrane [GO:0000139]; organelle membrane [GO:0031090]; perinuclear region of cytoplasm [GO:0048471]
F6SEU4	SYGP1_MOUSE	reviewed	Ras/Rap GTPase-activating protein SynGAP (Neuronal RasGAP) (Synaptic Ras GTPase-activating protein 1) (Synaptic Ras-GAP 1)	Syngap1	Mus musculus (Mouse)	1340	dendritic shaft [GO:0043198]; glutamatergic synapse [GO:0098978]; membrane [GO:0016020]; plasma membrane [GO:0005886]; postsynaptic density [GO:0014069]; postsynaptic density, intracellular component [GO:0099092]; synapse [GO:0045202]
F6ZDS4	TPR_MOUSE	reviewed	Nucleoprotein TPR (NPC-associated intranuclear protein) (Translocated promoter region and nuclear basket protein)	Tpr	Mus musculus (Mouse)	2431	cytoplasm [GO:0005737]; cytoplasmic dynein complex [GO:0005868]; extrinsic component of membrane [GO:0019898]; kinetochore [GO:0000776]; mitotic spindle [GO:0072686]; nuclear envelope [GO:0005635]; nuclear inclusion body [GO:0042405]; nuclear membrane [GO:0031965]; nuclear periphery [GO:0034399]; nuclear pore [GO:0005643]; nuclear pore nuclear basket [GO:0044615]; nucleus [GO:0005634]
F8VPU2	FARP1_MOUSE	reviewed	FERM, ARHGEF and pleckstrin domain-containing protein 1 (FERM, RhoGEF and pleckstrin domain-containing protein 1)	Farp1	Mus musculus (Mouse)	1048	cytoskeleton [GO:0005856]; cytosol [GO:0005829]; dendrite [GO:0030425]; dendritic spine [GO:0043197]; extrinsic component of cytoplasmic side of plasma membrane [GO:0031234]; extrinsic component of postsynaptic membrane [GO:0098890]; filopodium [GO:0030175]; glutamatergic synapse [GO:0098978]
G3X9J0	SI1L3_MOUSE	reviewed	Signal-induced proliferation-associated 1-like protein 3 (SIPA1-like protein 3) (SPA-1-like protein 3)	Sipa1l3 Spal3	Mus musculus (Mouse)	1776	apical part of cell [GO:0045177]; apical plasma membrane [GO:0016324]; cytoplasm [GO:0005737]; Golgi apparatus [GO:0005794]; nucleoplasm [GO:0005654]; plasma membrane [GO:0005886]; stress fiber [GO:0001725]; tricellular tight junction [GO:0061689]
G3X9K3	BIG1_MOUSE	reviewed	Brefeldin A-inhibited guanine nucleotide-exchange protein 1 (BIG1) (Brefeldin A-inhibited GEP 1) (ADP-ribosylation factor guanine nucleotide-exchange factor 1)	Arfgef1	Mus musculus (Mouse)	1846	cytosol [GO:0005829]; Golgi apparatus [GO:0005794]; Golgi membrane [GO:0000139]; nuclear matrix [GO:0016363]; nucleolus [GO:0005730]; nucleoplasm [GO:0005654]; perinuclear region of cytoplasm [GO:0048471]; small nuclear ribonucleoprotein complex [GO:0030532]; trans-Golgi network [GO:0005802]
G3XA57	RFIP2_MOUSE	reviewed	Rab11 family-interacting protein 2 (Rab11-FIP2)	Rab11fip2	Mus musculus (Mouse)	512	endosome [GO:0005768]; intracellular membrane-bounded organelle [GO:0043231]; nucleoplasm [GO:0005654]; phagocytic cup [GO:0001891]; recycling endosome membrane [GO:0055038]
G5E829	AT2B1_MOUSE	reviewed	Plasma membrane calcium-transporting ATPase 1 (EC 7.2.2.10) (Plasma membrane calcium ATPase isoform 1) (PMCA1) (Plasma membrane calcium pump isoform 1)	Atp2b1	Mus musculus (Mouse)	1220	apical part of cell [GO:0045177]; apical plasma membrane [GO:0016324]; basolateral plasma membrane [GO:0016323]; cytoplasmic side of plasma membrane [GO:0009898]; dendrite membrane [GO:0032590]; dendritic spine membrane [GO:0032591]; GABA-ergic synapse [GO:0098982]; glutamatergic synapse [GO:0098978]; immunological synapse [GO:0001772]; integral component of plasma membrane [GO:0005887]; integral…
G5E870	TRIPC_MOUSE	reviewed	E3 ubiquitin-protein ligase TRIP12 (EC 2.3.2.26) (HECT-type E3 ubiquitin transferase TRIP12) (Thyroid receptor-interacting protein 12) (TR-interacting protein 12) (TRIP-12)	Trip12	Mus musculus (Mouse)	2025	nuclear speck [GO:0016607]; nucleoplasm [GO:0005654]
G5E8K5	ANK3_MOUSE	reviewed	Ankyrin-3 (ANK-3) (Ankyrin-G)	Ank3	Mus musculus (Mouse)	1961	axon [GO:0030424]; axon initial segment [GO:0043194]; basal plasma membrane [GO:0009925]; basolateral plasma membrane [GO:0016323]; cell surface [GO:0009986]; dendrite [GO:0030425]; intercalated disc [GO:0014704]; lateral plasma membrane [GO:0016328]; lysosome [GO:0005764]; membrane [GO:0016020]; neuromuscular junction [GO:0031594]; neuron projection [GO:0043005]; node of Ranvier [GO:0033268]; pa…
O08529	CAN2_MOUSE	reviewed	Calpain-2 catalytic subunit (EC 3.4.22.53) (80 kDa M-calpain subunit) (CALP80) (Calcium-activated neutral proteinase 2) (CANP 2) (Calpain M-type) (Calpain-2 large subunit) (Millimolar-calpain) (M-calpain)	Capn2	Mus musculus (Mouse)	700	cell projection [GO:0042995]; chromatin [GO:0000785]; cytoplasm [GO:0005737]; cytosol [GO:0005829]; dendrite [GO:0030425]; endoplasmic reticulum [GO:0005783]; external side of plasma membrane [GO:0009897]; focal adhesion [GO:0005925]; Golgi apparatus [GO:0005794]; lysosome [GO:0005764]; membrane [GO:0016020]; membrane raft [GO:0045121]; mitochondrial intermembrane space [GO:0005758]; neuronal cel…
O08539	BIN1_MOUSE	reviewed	Myc box-dependent-interacting protein 1 (Amphiphysin II) (Amphiphysin-like protein) (Bridging integrator 1) (SH3 domain-containing protein 9)	Bin1 Amphl Sh3p9	Mus musculus (Mouse)	588	axon [GO:0030424]; axon initial segment [GO:0043194]; axon terminus [GO:0043679]; cerebellar mossy fiber [GO:0044300]; cytoplasm [GO:0005737]; cytosol [GO:0005829]; dendrite [GO:0030425]; endosome [GO:0005768]; extrinsic component of synaptic vesicle membrane [GO:0098850]; glutamatergic synapse [GO:0098978]; I band [GO:0031674]; lipid tube [GO:0060987]; membrane [GO:0016020]; microtubule [GO:0005…
O08547	SC22B_MOUSE	reviewed	Vesicle-trafficking protein SEC22b (ER-Golgi SNARE of 24 kDa) (ERS-24) (ERS24) (SEC22 vesicle-trafficking protein homolog B) (SEC22 vesicle-trafficking protein-like 1) (mSec22b)	Sec22b Sec22l1	Mus musculus (Mouse)	215	COPI-coated vesicle [GO:0030137]; endoplasmic reticulum-Golgi intermediate compartment [GO:0005793]; endoplasmic reticulum-Golgi intermediate compartment membrane [GO:0033116]; endoplasmic reticulum membrane [GO:0005789]; ER to Golgi transport vesicle membrane [GO:0012507]; Golgi membrane [GO:0000139]; integral component of membrane [GO:0016021]; melanosome [GO:0042470]; SNARE complex [GO:0031201…
O08553	DPYL2_MOUSE	reviewed	Dihydropyrimidinase-related protein 2 (DRP-2) (Unc-33-like phosphoprotein 2) (ULIP-2)	Dpysl2 Crmp2 Ulip2	Mus musculus (Mouse)	572	axon [GO:0030424]; cytoskeleton [GO:0005856]; cytosol [GO:0005829]; dendrite [GO:0030425]; growth cone [GO:0030426]; mitochondrion [GO:0005739]; myelin sheath [GO:0043209]; neuronal cell body [GO:0043025]; neuron projection [GO:0043005]; plasma membrane [GO:0005886]; presynapse [GO:0098793]; protein-containing complex [GO:0032991]; terminal bouton [GO:0043195]
O08576	RUN3A_MOUSE	reviewed	RUN domain-containing protein 3A (Rap2-interacting protein 8) (RPIP-8)	Rundc3a Rap2ip Rpip8	Mus musculus (Mouse)	446	cytosol [GO:0005829]; intracellular membrane-bounded organelle [GO:0043231]; plasma membrane [GO:0005886]
O08579	EMD_MOUSE	reviewed	Emerin	Emd Sta	Mus musculus (Mouse)	259	cortical endoplasmic reticulum [GO:0032541]; cytoplasm [GO:0005737]; endoplasmic reticulum [GO:0005783]; integral component of membrane [GO:0016021]; microtubule [GO:0005874]; nuclear envelope [GO:0005635]; nuclear inner membrane [GO:0005637]; nuclear lamina [GO:0005652]; nuclear membrane [GO:0031965]; nuclear outer membrane [GO:0005640]; nucleoplasm [GO:0005654]; nucleus [GO:0005634]; spindle [G…
O08582	GTPB1_MOUSE	reviewed	GTP-binding protein 1 (G-protein 1) (GP-1) (GP1)	Gtpbp1 Gtpbp	Mus musculus (Mouse)	668	cytoplasmic exosome (RNase complex) [GO:0000177]; cytosol [GO:0005829]
O08585	CLCA_MOUSE	reviewed	Clathrin light chain A (Lca)	Clta	Mus musculus (Mouse)	235	clathrin coat [GO:0030118]; clathrin-coated pit [GO:0005905]; clathrin-coated vesicle [GO:0030136]; clathrin coat of coated pit [GO:0030132]; clathrin coat of trans-Golgi network vesicle [GO:0030130]; clathrin complex [GO:0071439]; clathrin vesicle coat [GO:0030125]; cytoplasmic vesicle [GO:0031410]; glutamatergic synapse [GO:0098978]; plasma membrane [GO:0005886]; postsynaptic endocytic zone [GO…
O08586	PTEN_MOUSE	reviewed	Phosphatidylinositol 3,4,5-trisphosphate 3-phosphatase and dual-specificity protein phosphatase PTEN (EC 3.1.3.16) (EC 3.1.3.48) (EC 3.1.3.67) (Mutated in multiple advanced cancers 1) (Phosphatase and tensin homolog)	Pten Mmac1	Mus musculus (Mouse)	403	apical plasma membrane [GO:0016324]; cell projection [GO:0042995]; cytoplasm [GO:0005737]; cytoplasmic side of plasma membrane [GO:0009898]; cytosol [GO:0005829]; dendritic spine [GO:0043197]; mitochondrion [GO:0005739]; myelin sheath adaxonal region [GO:0035749]; neuron projection [GO:0043005]; nucleoplasm [GO:0005654]; nucleus [GO:0005634]; plasma membrane [GO:0005886]; PML body [GO:0016605]; p…
O08599	STXB1_MOUSE	reviewed	Syntaxin-binding protein 1 (Protein unc-18 homolog 1) (Unc18-1) (Protein unc-18 homolog A) (Unc-18A)	Stxbp1	Mus musculus (Mouse)	594	axon [GO:0030424]; cytoplasm [GO:0005737]; cytoskeleton [GO:0005856]; cytosol [GO:0005829]; extrinsic component of presynaptic active zone membrane [GO:0098891]; glutamatergic synapse [GO:0098978]; mitochondrion [GO:0005739]; myelin sheath [GO:0043209]; nucleoplasm [GO:0005654]; nucleus [GO:0005634]; perinuclear region of cytoplasm [GO:0048471]; phagocytic vesicle [GO:0045335]; plasma membrane [G…
O08644	EPHB6_MOUSE	reviewed	Ephrin type-B receptor 6 (MEP) (Tyrosine-protein kinase-defective receptor EPH-6)	Ephb6 Cekl	Mus musculus (Mouse)	1014	cell surface [GO:0009986]; extracellular region [GO:0005576]; integral component of plasma membrane [GO:0005887]; neuron projection [GO:0043005]; receptor complex [GO:0043235]
O08663	MAP2_MOUSE	reviewed	Methionine aminopeptidase 2 (MAP 2) (MetAP 2) (EC 3.4.11.18) (Initiation factor 2-associated 67 kDa glycoprotein) (p67) (p67eIF2) (Peptidase M)	Metap2 Mnpep P67eif2	Mus musculus (Mouse)	478	cytoplasm [GO:0005737]; cytosol [GO:0005829]; plasma membrane [GO:0005886]
O08688	CAN5_MOUSE	reviewed	Calpain-5 (EC 3.4.22.-) (New calpain 3) (nCL-3)	Capn5 Ncl3	Mus musculus (Mouse)	640	cell surface [GO:0009986]; cytoplasm [GO:0005737]; synapse [GO:0045202]
O08709	PRDX6_MOUSE	reviewed	Peroxiredoxin-6 (EC 1.11.1.27) (1-Cys peroxiredoxin) (1-Cys PRX) (Acidic calcium-independent phospholipase A2) (aiPLA2) (EC 3.1.1.4) (Antioxidant protein 2) (Glutathione-dependent peroxiredoxin) (Lysophosphatidylcholine acyltransferase 5) (LPC acyltransferase 5) (LPCAT-5) (Lyso-PC acyltransferase 5) (EC 2.3.1.23) (Non-selenium glutathione peroxidase) (NSGPx)	Prdx6 Aop2 Ltw4 Prdx5	Mus musculus (Mouse)	224	cytoplasm [GO:0005737]; cytosol [GO:0005829]; lysosome [GO:0005764]; mitochondrion [GO:0005739]; nucleus [GO:0005634]; perinuclear region of cytoplasm [GO:0048471]
O08715	AKAP1_MOUSE	reviewed	A-kinase anchor protein 1, mitochondrial (Dual specificity A-kinase-anchoring protein 1) (D-AKAP-1) (Protein kinase A-anchoring protein 1) (PRKA1) (Spermatid A-kinase anchor protein) (S-AKAP)	Akap1 Akap	Mus musculus (Mouse)	857	endoplasmic reticulum [GO:0005783]; integral component of membrane [GO:0016021]; lipid droplet [GO:0005811]; mitochondrial crista [GO:0030061]; mitochondrial outer membrane [GO:0005741]; mitochondrion [GO:0005739]; neuromuscular junction [GO:0031594]; postsynaptic membrane [GO:0045211]
O08739	AMPD3_MOUSE	reviewed	AMP deaminase 3 (EC 3.5.4.6) (AMP deaminase H-type) (AMP deaminase isoform E) (Heart-type AMPD)	Ampd3	Mus musculus (Mouse)	766	cytosol [GO:0005829]
O08749	DLDH_MOUSE	reviewed	Dihydrolipoyl dehydrogenase, mitochondrial (EC 1.8.1.4) (Dihydrolipoamide dehydrogenase)	Dld	Mus musculus (Mouse)	509	acrosomal matrix [GO:0043159]; cilium [GO:0005929]; mitochondrial matrix [GO:0005759]; mitochondrion [GO:0005739]; motile cilium [GO:0031514]; myelin sheath [GO:0043209]; nucleus [GO:0005634]; oxoglutarate dehydrogenase complex [GO:0045252]; pyruvate dehydrogenase complex [GO:0045254]
O08756	HCD2_MOUSE	reviewed	3-hydroxyacyl-CoA dehydrogenase type-2 (EC 1.1.1.35) (17-beta-estradiol 17-dehydrogenase) (EC 1.1.1.62) (2-methyl-3-hydroxybutyryl-CoA dehydrogenase) (MHBD) (3-alpha-(17-beta)-hydroxysteroid dehydrogenase (NAD(+))) (EC 1.1.1.239) (3-hydroxy-2-methylbutyryl-CoA dehydrogenase) (EC 1.1.1.178) (3-hydroxyacyl-CoA dehydrogenase type II) (3alpha(or 20beta)-hydroxysteroid dehydrogenase) (EC 1.1.1.53) (7-…	Hsd17b10 Erab Hadh2	Mus musculus (Mouse)	261	endoplasmic reticulum [GO:0005783]; mitochondrial inner membrane [GO:0005743]; mitochondrial nucleoid [GO:0042645]; mitochondrial ribonuclease P complex [GO:0030678]; mitochondrion [GO:0005739]
O08759	UBE3A_MOUSE	reviewed	Ubiquitin-protein ligase E3A (EC 2.3.2.26) (HECT-type ubiquitin transferase E3A) (Oncogenic protein-associated protein E6-AP)	Ube3a	Mus musculus (Mouse)	870	cytosol [GO:0005829]; nucleus [GO:0005634]; proteasome complex [GO:0000502]
O08784	TCOF_MOUSE	reviewed	Treacle protein (Treacher Collins syndrome protein homolog)	Tcof1	Mus musculus (Mouse)	1320	cytosol [GO:0005829]; fibrillar center [GO:0001650]; nucleolus [GO:0005730]; nucleoplasm [GO:0005654]
O08788	DCTN1_MOUSE	reviewed	Dynactin subunit 1 (150 kDa dynein-associated polypeptide) (DAP-150) (DP-150) (p150-glued)	Dctn1	Mus musculus (Mouse)	1281	axon [GO:0030424]; cell cortex [GO:0005938]; cell cortex region [GO:0099738]; cell leading edge [GO:0031252]; centriolar subdistal appendage [GO:0120103]; centriole [GO:0005814]; centrosome [GO:0005813]; ciliary basal body [GO:0036064]; cytoplasm [GO:0005737]; cytoplasmic dynein complex [GO:0005868]; cytosol [GO:0005829]; intercellular bridge [GO:0045171]; kinetochore [GO:0000776]; microtubule [G…
O08795	GLU2B_MOUSE	reviewed	Glucosidase 2 subunit beta (80K-H protein) (Glucosidase II subunit beta) (Protein kinase C substrate 60.1 kDa protein heavy chain) (PKCSH)	Prkcsh	Mus musculus (Mouse)	521	endoplasmic reticulum [GO:0005783]; glucosidase II complex [GO:0017177]; intracellular membrane-bounded organelle [GO:0043231]
O08807	PRDX4_MOUSE	reviewed	Peroxiredoxin-4 (EC 1.11.1.24) (Antioxidant enzyme AOE372) (Peroxiredoxin IV) (Prx-IV) (Thioredoxin peroxidase AO372) (Thioredoxin-dependent peroxide reductase A0372) (Thioredoxin-dependent peroxiredoxin 4)	Prdx4	Mus musculus (Mouse)	274	cytoplasm [GO:0005737]; cytosol [GO:0005829]; endoplasmic reticulum [GO:0005783]; extracellular space [GO:0005615]; mitochondrion [GO:0005739]; smooth endoplasmic reticulum [GO:0005790]
O08808	DIAP1_MOUSE	reviewed	Protein diaphanous homolog 1 (Diaphanous-related formin-1) (DRF1) (p140mDIA) (mDIA1)	Diaph1 Diap1	Mus musculus (Mouse)	1255	brush border [GO:0005903]; cytoplasm [GO:0005737]; microtubule organizing center [GO:0005815]; mitotic spindle [GO:0072686]; neuron projection [GO:0043005]; nucleus [GO:0005634]; ruffle membrane [GO:0032587]
O08810	U5S1_MOUSE	reviewed	116 kDa U5 small nuclear ribonucleoprotein component (Elongation factor Tu GTP-binding domain-containing protein 2) (U5 snRNP-specific protein, 116 kDa) (U5-116 kDa)	Eftud2 Snrp116	Mus musculus (Mouse)	971	Cajal body [GO:0015030]; catalytic step 2 spliceosome [GO:0071013]; cytosol [GO:0005829]; intracellular membrane-bounded organelle [GO:0043231]; nuclear speck [GO:0016607]; nucleoplasm [GO:0005654]; nucleus [GO:0005634]; ribonucleoprotein complex [GO:1990904]; U2-type catalytic step 2 spliceosome [GO:0071007]; U2-type precatalytic spliceosome [GO:0071005]; U4/U6 x U5 tri-snRNP complex [GO:0046540]
O08848	RO60_MOUSE	reviewed	60 kDa SS-A/Ro ribonucleoprotein (60 kDa Ro protein) (60 kDa ribonucleoprotein Ro) (Ro60) (RoRNP) (TROVE domain family member 2)	RO60 Ssa2 Trove2	Mus musculus (Mouse)	538	cytoplasm [GO:0005737]; cytosol [GO:0005829]; nucleoplasm [GO:0005654]; nucleus [GO:0005634]; ribonucleoprotein complex [GO:1990904]
O08914	FAAH1_MOUSE	reviewed	Fatty-acid amide hydrolase 1 (EC 3.5.1.99) (Anandamide amidohydrolase 1) (Fatty acid ester hydrolase) (EC 3.1.1.-) (Oleamide hydrolase 1)	Faah Faah1	Mus musculus (Mouse)	579	endoplasmic reticulum membrane [GO:0005789]; Golgi membrane [GO:0000139]; integral component of membrane [GO:0016021]; organelle membrane [GO:0031090]
O08915	AIP_MOUSE	reviewed	AH receptor-interacting protein (AIP) (Aryl-hydrocarbon receptor-interacting protein)	Aip	Mus musculus (Mouse)	330	aryl hydrocarbon receptor complex [GO:0034751]; cytosol [GO:0005829]; membrane [GO:0016020]; plasma membrane [GO:0005886]
O08917	FLOT1_MOUSE	reviewed	Flotillin-1	Flot1	Mus musculus (Mouse)	428	adherens junction [GO:0005912]; basolateral plasma membrane [GO:0016323]; caveola [GO:0005901]; cell-cell contact zone [GO:0044291]; cell-cell junction [GO:0005911]; centriolar satellite [GO:0034451]; COP9 signalosome [GO:0008180]; cortical actin cytoskeleton [GO:0030864]; cytoplasmic vesicle [GO:0031410]; dopaminergic synapse [GO:0098691]; early endosome [GO:0005769]; endosome [GO:0005768]; exte…
O08919	NUMBL_MOUSE	reviewed	Numb-like protein	Numbl Nbl	Mus musculus (Mouse)	604	cytoplasm [GO:0005737]
O08989	RASM_MOUSE	reviewed	Ras-related protein M-Ras (EC 3.6.5.2) (Muscle and microspikes Ras) (Ras-related protein R-Ras3) (X-Ras)	Mras Xras	Mus musculus (Mouse)	208	plasma membrane [GO:0005886]
O09012	PEX5_MOUSE	reviewed	Peroxisomal targeting signal 1 receptor (PTS1 receptor) (PTS1R) (PTS1-BP) (PXR1P) (Peroxin-5) (Peroxisomal C-terminal targeting signal import receptor) (Peroxisome receptor 1)	Pex5 Pxr1	Mus musculus (Mouse)	639	cytoplasm [GO:0005737]; cytosol [GO:0005829]; Golgi apparatus [GO:0005794]; membrane [GO:0016020]; mitochondrion [GO:0005739]; peroxisomal matrix [GO:0005782]; peroxisomal membrane [GO:0005778]; peroxisome [GO:0005777]; protein-containing complex [GO:0032991]
O09061	PSB1_MOUSE	reviewed	Proteasome subunit beta type-1 (Macropain subunit C5) (Multicatalytic endopeptidase complex subunit C5) (Proteasome component C5) (Proteasome gamma chain)	Psmb1	Mus musculus (Mouse)	240	cytoplasm [GO:0005737]; cytosol [GO:0005829]; nucleoplasm [GO:0005654]; nucleus [GO:0005634]; proteasome complex [GO:0000502]; proteasome core complex [GO:0005839]; proteasome core complex, beta-subunit complex [GO:0019774]
O09111	NDUBB_MOUSE	reviewed	NADH dehydrogenase [ubiquinone] 1 beta subcomplex subunit 11, mitochondrial (Complex I-ESSS) (CI-ESSS) (NADH-ubiquinone oxidoreductase ESSS subunit) (Neuronal protein 15.6) (Np15.6) (p15.6)	Ndufb11 Np15	Mus musculus (Mouse)	151	mitochondrial respiratory chain complex I [GO:0005747]; mitochondrion [GO:0005739]
O09126	SEM4D_MOUSE	reviewed	Semaphorin-4D (M-Sema G) (Semaphorin-C-like 2) (Semaphorin-J) (Sema J) (CD antigen CD100)	Sema4d Semacl2 Semaj	Mus musculus (Mouse)	861	extracellular space [GO:0005615]; integral component of plasma membrane [GO:0005887]; membrane [GO:0016020]
O09131	GSTO1_MOUSE	reviewed	Glutathione S-transferase omega-1 (GSTO-1) (EC 2.5.1.18) (Glutathione S-transferase omega 1-1) (GSTO 1-1) (Glutathione-dependent dehydroascorbate reductase) (EC 1.8.5.1) (Monomethylarsonic acid reductase) (MMA(V) reductase) (EC 1.20.4.2) (S-(Phenacyl)glutathione reductase) (SPG-R) (p28)	Gsto1 Gstx Gtsttl	Mus musculus (Mouse)	240	axon [GO:0030424]; basement membrane [GO:0005604]; cell body [GO:0044297]; cytoplasm [GO:0005737]; cytosol [GO:0005829]; myelin sheath [GO:0043209]; nuclear membrane [GO:0031965]; nucleoplasm [GO:0005654]
O09167	RL21_MOUSE	reviewed	60S ribosomal protein L21	Rpl21	Mus musculus (Mouse)	160	cytosol [GO:0005829]; cytosolic large ribosomal subunit [GO:0022625]; cytosolic ribosome [GO:0022626]; endoplasmic reticulum [GO:0005783]; ribosome [GO:0005840]
O35066	KIF3C_MOUSE	reviewed	Kinesin-like protein KIF3C	Kif3c	Mus musculus (Mouse)	796	axon [GO:0030424]; cytosol [GO:0005829]; dendrite [GO:0030425]; growth cone [GO:0030426]; kinesin complex [GO:0005871]; membrane [GO:0016020]; microtubule [GO:0005874]; microtubule cytoskeleton [GO:0015630]; microtubule plus-end [GO:0035371]; neuronal cell body [GO:0043025]; neuronal ribonucleoprotein granule [GO:0071598]; synaptic vesicle [GO:0008021]
O35075	VP26C_MOUSE	reviewed	Vacuolar protein sorting-associated protein 26C (Down syndrome critical region protein 3 homolog) (Down syndrome critical region protein A homolog)	Vps26c Dcra Dscr3 Dscra	Mus musculus (Mouse)	297	endosome [GO:0005768]
O35083	PLCA_MOUSE	reviewed	1-acyl-sn-glycerol-3-phosphate acyltransferase alpha (EC 2.3.1.51) (1-acylglycerol-3-phosphate O-acyltransferase 1) (1-AGP acyltransferase 1) (1-AGPAT 1) (Lysophosphatidic acid acyltransferase alpha) (LPAAT-alpha)	Agpat1	Mus musculus (Mouse)	285	endoplasmic reticulum [GO:0005783]; endoplasmic reticulum membrane [GO:0005789]; integral component of membrane [GO:0016021]
O35098	DPYL4_MOUSE	reviewed	Dihydropyrimidinase-related protein 4 (DRP-4) (Collapsin response mediator protein 3) (CRMP-3) (UNC33-like phosphoprotein 4) (ULIP-4)	Dpysl4 Crmp3 Ulip4	Mus musculus (Mouse)	572	cytoplasm [GO:0005737]
O35099	M3K5_MOUSE	reviewed	Mitogen-activated protein kinase kinase kinase 5 (EC 2.7.11.25) (Apoptosis signal-regulating kinase 1) (ASK-1) (MAPK/ERK kinase kinase 5) (MEK kinase 5) (MEKK 5)	Map3k5 Ask1 Mekk5	Mus musculus (Mouse)	1380	cytoplasm [GO:0005737]; cytosol [GO:0005829]; external side of plasma membrane [GO:0009897]; IRE1-TRAF2-ASK1 complex [GO:1990604]; protein-containing complex [GO:0032991]; protein kinase complex [GO:1902911]
O35129	PHB2_MOUSE	reviewed	Prohibitin-2 (B-cell receptor-associated protein BAP37) (Repressor of estrogen receptor activity)	Phb2 Bap Bcap37 Rea	Mus musculus (Mouse)	299	axon [GO:0030424]; cell periphery [GO:0071944]; cell surface [GO:0009986]; cytoplasm [GO:0005737]; GABA-ergic synapse [GO:0098982]; glutamatergic synapse [GO:0098978]; inner mitochondrial membrane protein complex [GO:0098800]; mitochondrial inner membrane [GO:0005743]; mitochondrial outer membrane [GO:0005741]; mitochondrial prohibitin complex [GO:0035632]; mitochondrion [GO:0005739]; nuclear mat…
O35136	NCAM2_MOUSE	reviewed	Neural cell adhesion molecule 2 (N-CAM-2) (NCAM-2) (Neural cell adhesion molecule RB-8) (R4B12)	Ncam2 Ocam Rncam	Mus musculus (Mouse)	837	anchored component of membrane [GO:0031225]; axon [GO:0030424]; integral component of membrane [GO:0016021]; neuron projection [GO:0043005]; nuclear body [GO:0016604]; plasma membrane [GO:0005886]
O35143	ATIF1_MOUSE	reviewed	ATPase inhibitor, mitochondrial (ATP synthase F1 subunit epsilon) (Inhibitor of F(1)F(o)-ATPase) (IF(1)) (IF1)	Atp5if1 Atpi Atpif1 If1	Mus musculus (Mouse)	106	cell surface [GO:0009986]; mitochondrion [GO:0005739]; protein-containing complex [GO:0032991]
O35226	PSMD4_MOUSE	reviewed	26S proteasome non-ATPase regulatory subunit 4 (26S proteasome regulatory subunit RPN10) (26S proteasome regulatory subunit S5A) (Multiubiquitin chain-binding protein)	Psmd4 Mcb1	Mus musculus (Mouse)	376	cytoplasm [GO:0005737]; cytosol [GO:0005829]; nucleoplasm [GO:0005654]; nucleus [GO:0005634]; proteasome accessory complex [GO:0022624]; proteasome complex [GO:0000502]; proteasome regulatory particle, base subcomplex [GO:0008540]
O35239	PTN9_MOUSE	reviewed	Tyrosine-protein phosphatase non-receptor type 9 (EC 3.1.3.48) (Protein-tyrosine phosphatase MEG2) (PTPase MEG2)	Ptpn9	Mus musculus (Mouse)	593	cytoplasm [GO:0005737]; neuron projection terminus [GO:0044306]
O35250	EXOC7_MOUSE	reviewed	Exocyst complex component 7 (Exocyst complex component Exo70)	Exoc7 Exo70	Mus musculus (Mouse)	697	centriolar satellite [GO:0034451]; cytosol [GO:0005829]; exocyst [GO:0000145]; Flemming body [GO:0090543]; growth cone membrane [GO:0032584]; microtubule organizing center [GO:0005815]; plasma membrane [GO:0005886]
O35286	DHX15_MOUSE	reviewed	Pre-mRNA-splicing factor ATP-dependent RNA helicase DHX15 (EC 3.6.4.13) (DEAH box protein 15)	Dhx15 Ddx15 Deah9	Mus musculus (Mouse)	795	nuclear speck [GO:0016607]; nucleolus [GO:0005730]; spliceosomal complex [GO:0005681]; U12-type spliceosomal complex [GO:0005689]; U2-type post-mRNA release spliceosomal complex [GO:0071008]
O35295	PURB_MOUSE	reviewed	Transcriptional activator protein Pur-beta (Purine-rich element-binding protein B) (Vascular actin single-stranded DNA-binding factor 2 p44 component)	Purb	Mus musculus (Mouse)	324	nucleoplasm [GO:0005654]; nucleus [GO:0005634]
O35326	SRSF5_MOUSE	reviewed	Serine/arginine-rich splicing factor 5 (Delayed-early protein HRS) (Pre-mRNA-splicing factor SRP40) (Splicing factor, arginine/serine-rich 5)	Srsf5 Hrs Sfrs5	Mus musculus (Mouse)	269	nuclear speck [GO:0016607]; nucleus [GO:0005634]
O35344	IMA4_MOUSE	reviewed	Importin subunit alpha-4 (Importin alpha Q2) (Qip2) (Karyopherin subunit alpha-3)	Kpna3 Qip2	Mus musculus (Mouse)	521	cytoplasm [GO:0005737]; nucleoplasm [GO:0005654]; nucleus [GO:0005634]
O35350	CAN1_MOUSE	reviewed	Calpain-1 catalytic subunit (EC 3.4.22.52) (Calcium-activated neutral proteinase 1) (CANP 1) (Calpain mu-type) (Calpain-1 large subunit) (Micromolar-calpain) (muCANP)	Capn1 Canp1 Capa1	Mus musculus (Mouse)	713	cytoplasm [GO:0005737]; cytosol [GO:0005829]; lysosome [GO:0005764]; membrane [GO:0016020]; mitochondrion [GO:0005739]; plasma membrane [GO:0005886]
O35381	AN32A_MOUSE	reviewed	Acidic leucine-rich nuclear phosphoprotein 32 family member A (Acidic nuclear phosphoprotein pp32) (Leucine-rich acidic nuclear protein) (LANP) (Potent heat-stable protein phosphatase 2A inhibitor I1PP2A)	Anp32a Anp32 Lanp	Mus musculus (Mouse)	247	cytoplasm [GO:0005737]; endoplasmic reticulum [GO:0005783]; nuclear matrix [GO:0016363]; nucleus [GO:0005634]; perinuclear region of cytoplasm [GO:0048471]
O35382	EXOC4_MOUSE	reviewed	Exocyst complex component 4 (Exocyst complex component Sec8)	Exoc4 Sec8 Sec8l1	Mus musculus (Mouse)	975	cell leading edge [GO:0031252]; cytoplasm [GO:0005737]; dendritic shaft [GO:0043198]; exocyst [GO:0000145]; Flemming body [GO:0090543]; growth cone [GO:0030426]; growth cone membrane [GO:0032584]; microvillus [GO:0005902]; myelin sheath [GO:0043209]; myelin sheath abaxonal region [GO:0035748]; neuronal cell body [GO:0043025]; neuron projection [GO:0043005]; plasma membrane [GO:0005886]; postsynap…
O35405	PLD3_MOUSE	reviewed	5'-3' exonuclease PLD3 (EC 3.1.16.1) (Choline phosphatase 3) (Phosphatidylcholine-hydrolyzing phospholipase D3) (Phospholipase D3) (PLD 3) (Schwannoma-associated protein 9) (SAM-9)	Pld3 Sam9	Mus musculus (Mouse)	488	early endosome membrane [GO:0031901]; endoplasmic reticulum membrane [GO:0005789]; Golgi membrane [GO:0000139]; integral component of membrane [GO:0016021]; late endosome membrane [GO:0031902]; lysosomal lumen [GO:0043202]; lysosomal membrane [GO:0005765]
O35449	PRRT1_MOUSE	reviewed	Proline-rich transmembrane protein 1 (Dispanin subfamily D member 1) (DSPD1) (Synapse differentiation-induced protein 4) (SynDIG4)	Prrt1 Ng5	Mus musculus (Mouse)	306	glutamatergic synapse [GO:0098978]; integral component of postsynaptic membrane [GO:0099055]; membrane [GO:0016020]; postsynaptic density membrane [GO:0098839]; synaptic vesicle membrane [GO:0030672]
O35465	FKBP8_MOUSE	reviewed	Peptidyl-prolyl cis-trans isomerase FKBP8 (PPIase FKBP8) (EC 5.2.1.8) (38 kDa FK506-binding protein) (38 kDa FKBP) (FKBP-38) (mFKBP38) (FK506-binding protein 8) (FKBP-8) (FKBPR38) (Rotamase)	Fkbp8 Fkbp38 Sam11	Mus musculus (Mouse)	402	cytosol [GO:0005829]; endoplasmic reticulum [GO:0005783]; integral component of endoplasmic reticulum membrane [GO:0030176]; mitochondrial envelope [GO:0005740]; mitochondrial membrane [GO:0031966]; mitochondrion [GO:0005739]; protein-containing complex [GO:0032991]
O35495	CDK14_MOUSE	reviewed	Cyclin-dependent kinase 14 (EC 2.7.11.22) (Cell division protein kinase 14) (Serine/threonine-protein kinase PFTAIRE-1)	Cdk14 Kiaa0834 Pftk1	Mus musculus (Mouse)	469	cytoplasm [GO:0005737]; cytoplasmic cyclin-dependent protein kinase holoenzyme complex [GO:0000308]; cytosol [GO:0005829]; nucleoplasm [GO:0005654]; nucleus [GO:0005634]; plasma membrane [GO:0005886]
O35526	STX1A_MOUSE	reviewed	Syntaxin-1A (Neuron-specific antigen HPC-1)	Stx1a	Mus musculus (Mouse)	288	acrosomal vesicle [GO:0001669]; actomyosin [GO:0042641]; axon [GO:0030424]; endomembrane system [GO:0012505]; glutamatergic synapse [GO:0098978]; integral component of membrane [GO:0016021]; integral component of plasma membrane [GO:0005887]; integral component of presynaptic membrane [GO:0099056]; integral component of synaptic vesicle membrane [GO:0030285]; intracellular organelle [GO:0043229];…
O35551	RABE1_MOUSE	reviewed	Rab GTPase-binding effector protein 1 (Rabaptin-5) (Rabaptin-5alpha)	Rabep1 Rab5ep Rabpt5 Rabpt5a	Mus musculus (Mouse)	862	early endosome [GO:0005769]; endocytic vesicle [GO:0030139]; endosome [GO:0005768]; intracellular membrane-bounded organelle [GO:0043231]; protein-containing complex [GO:0032991]; recycling endosome [GO:0055037]
O35593	PSDE_MOUSE	reviewed	26S proteasome non-ATPase regulatory subunit 14 (EC 3.4.19.-) (26S proteasome regulatory subunit RPN11) (MAD1)	Psmd14 Pad1	Mus musculus (Mouse)	310	cytosolic proteasome complex [GO:0031597]; proteasome accessory complex [GO:0022624]; proteasome complex [GO:0000502]; proteasome regulatory particle, lid subcomplex [GO:0008541]
O35607	BMPR2_MOUSE	reviewed	Bone morphogenetic protein receptor type-2 (BMP type-2 receptor) (BMPR-2) (EC 2.7.11.30) (BRK-3) (Bone morphogenetic protein receptor type II) (BMP type II receptor) (BMPR-II)	Bmpr2	Mus musculus (Mouse)	1038	adherens junction [GO:0005912]; apical plasma membrane [GO:0016324]; basal plasma membrane [GO:0009925]; caveola [GO:0005901]; cell surface [GO:0009986]; clathrin-coated pit [GO:0005905]; cytoplasm [GO:0005737]; dendrite [GO:0030425]; integral component of plasma membrane [GO:0005887]; neuronal cell body [GO:0043025]; nucleoplasm [GO:0005654]; plasma membrane [GO:0005886]; postsynaptic density [G…
O35609	SCAM3_MOUSE	reviewed	Secretory carrier-associated membrane protein 3 (Secretory carrier membrane protein 3)	Scamp3	Mus musculus (Mouse)	349	Golgi membrane [GO:0000139]; integral component of membrane [GO:0016021]; intracellular membrane-bounded organelle [GO:0043231]; recycling endosome membrane [GO:0055038]; trans-Golgi network membrane [GO:0032588]
O35621	PMM1_MOUSE	reviewed	Phosphomannomutase 1 (PMM 1) (EC 5.4.2.8)	Pmm1	Mus musculus (Mouse)	262	cytoplasm [GO:0005737]; cytosol [GO:0005829]; neuronal cell body [GO:0043025]
O35633	VIAAT_MOUSE	reviewed	Vesicular inhibitory amino acid transporter (GABA and glycine transporter) (Solute carrier family 32 member 1) (Vesicular GABA transporter) (mVGAT) (mVIAAT)	Slc32a1 Vgat Viaat	Mus musculus (Mouse)	525	cell tip [GO:0051286]; cone cell pedicle [GO:0044316]; dendrite [GO:0030425]; dendrite terminus [GO:0044292]; GABA-ergic synapse [GO:0098982]; inhibitory synapse [GO:0060077]; integral component of plasma membrane [GO:0005887]; integral component of synaptic vesicle membrane [GO:0030285]; intracellular organelle [GO:0043229]; neuron projection [GO:0043005]; neuron projection terminus [GO:0044306]…
O35643	AP1B1_MOUSE	reviewed	AP-1 complex subunit beta-1 (Adaptor protein complex AP-1 subunit beta-1) (Adaptor-related protein complex 1 subunit beta-1) (Beta-1-adaptin) (Beta-adaptin 1) (Clathrin assembly protein complex 1 beta large chain) (Golgi adaptor HA1/AP1 adaptin beta subunit)	Ap1b1 Adtb1	Mus musculus (Mouse)	943	clathrin adaptor complex [GO:0030131]; clathrin-coated vesicle membrane [GO:0030665]; cytosol [GO:0005829]; Golgi apparatus [GO:0005794]; intracellular membrane-bounded organelle [GO:0043231]; trans-Golgi network [GO:0005802]
O35678	MGLL_MOUSE	reviewed	Monoglyceride lipase (MGL) (EC 3.1.1.23) (Monoacylglycerol lipase) (MAGL)	Mgll	Mus musculus (Mouse)	303	axon [GO:0030424]; cytosol [GO:0005829]; extrinsic component of membrane [GO:0019898]; membrane [GO:0016020]; nucleoplasm [GO:0005654]; synapse [GO:0045202]; varicosity [GO:0043196]
O35681	SYT3_MOUSE	reviewed	Synaptotagmin-3 (Synaptotagmin III) (SytIII)	Syt3	Mus musculus (Mouse)	587	endosome [GO:0005768]; exocytic vesicle [GO:0070382]; integral component of synaptic membrane [GO:0099699]; plasma membrane [GO:0005886]; transport vesicle membrane [GO:0030658]
O35685	NUDC_MOUSE	reviewed	Nuclear migration protein nudC (Nuclear distribution protein C homolog) (Silica-induced gene 92 protein) (SIG-92)	Nudc	Mus musculus (Mouse)	332	cytoplasm [GO:0005737]; cytosol [GO:0005829]; Golgi apparatus [GO:0005794]; microtubule [GO:0005874]; midbody [GO:0030496]; mitotic spindle [GO:0072686]; nucleus [GO:0005634]
O35691	PININ_MOUSE	reviewed	Pinin	Pnn	Mus musculus (Mouse)	725	catalytic step 2 spliceosome [GO:0071013]; cytoplasm [GO:0005737]; desmosome [GO:0030057]; nuclear speck [GO:0016607]
O35841	API5_MOUSE	reviewed	Apoptosis inhibitor 5 (API-5) (AAC-11)	Api5	Mus musculus (Mouse)	504	cytoplasm [GO:0005737]; nuclear speck [GO:0016607]; nucleus [GO:0005634]; spliceosomal complex [GO:0005681]
O35857	TIM44_MOUSE	reviewed	Mitochondrial import inner membrane translocase subunit TIM44	Timm44 Mimt44 Tim44	Mus musculus (Mouse)	452	fibrillar center [GO:0001650]; mitochondrial inner membrane [GO:0005743]; mitochondrial matrix [GO:0005759]; mitochondrion [GO:0005739]
O35864	CSN5_MOUSE	reviewed	COP9 signalosome complex subunit 5 (SGN5) (Signalosome subunit 5) (EC 3.4.-.-) (Jun activation domain-binding protein 1) (Kip1 C-terminus-interacting protein 2)	Cops5 Csn5 Jab1 Kic2	Mus musculus (Mouse)	334	chromatin [GO:0000785]; COP9 signalosome [GO:0008180]; cytoplasm [GO:0005737]; cytosol [GO:0005829]; nucleoplasm [GO:0005654]; nucleus [GO:0005634]; perinuclear region of cytoplasm [GO:0048471]; synaptic vesicle [GO:0008021]; transcription regulator complex [GO:0005667]
O35874	SATT_MOUSE	reviewed	Neutral amino acid transporter A (Alanine/serine/cysteine/threonine transporter 1) (ASCT-1) (SATT) (Solute carrier family 1 member 4)	Slc1a4 Asct1	Mus musculus (Mouse)	532	centrosome [GO:0005813]; dendrite [GO:0030425]; integral component of membrane [GO:0016021]; intermediate filament [GO:0005882]; melanosome [GO:0042470]; membrane [GO:0016020]; neuronal cell body [GO:0043025]; plasma membrane [GO:0005886]
O35927	CTND2_MOUSE	reviewed	Catenin delta-2 (Neural plakophilin-related ARM-repeat protein) (NPRAP) (Neurojungin)	Ctnnd2 Catnd2 Nprap	Mus musculus (Mouse)	1247	adherens junction [GO:0005912]; cytoplasm [GO:0005737]; dendrite [GO:0030425]; neuron projection [GO:0043005]; nucleus [GO:0005634]; perikaryon [GO:0043204]; plasma membrane [GO:0005886]; postsynaptic density [GO:0014069]
O35954	PITM1_MOUSE	reviewed	Membrane-associated phosphatidylinositol transfer protein 1 (Drosophila retinal degeneration B homolog 1) (RdgB1) (Mpt-1) (Phosphatidylinositol transfer protein, membrane-associated 1) (PITPnm 1) (Pyk2 N-terminal domain-interacting receptor 2) (NIR-2)	Pitpnm1 Dres9 Mpt1 Nir2 Pitpnm	Mus musculus (Mouse)	1243	cell body [GO:0044297]; cleavage furrow [GO:0032154]; cytoplasm [GO:0005737]; cytosol [GO:0005829]; endoplasmic reticulum membrane [GO:0005789]; Golgi cisterna membrane [GO:0032580]; intracellular membrane-bounded organelle [GO:0043231]; lipid droplet [GO:0005811]; midbody [GO:0030496]
O35963	RB33B_MOUSE	reviewed	Ras-related protein Rab-33B	Rab33b	Mus musculus (Mouse)	229	endosome [GO:0005768]; Golgi apparatus [GO:0005794]; Golgi lumen [GO:0005796]; Golgi membrane [GO:0000139]; presynapse [GO:0098793]
O54774	AP3D1_MOUSE	reviewed	AP-3 complex subunit delta-1 (AP-3 complex subunit delta) (Adaptor-related protein complex 3 subunit delta-1) (Delta-adaptin) (mBLVR1)	Ap3d1 Ap3d	Mus musculus (Mouse)	1199	AP-3 adaptor complex [GO:0030123]; axon [GO:0030424]; axon cytoplasm [GO:1904115]; endosome membrane [GO:0010008]; glutamatergic synapse [GO:0098978]; Golgi membrane [GO:0000139]; postsynapse [GO:0098794]; presynapse [GO:0098793]; presynaptic endosome [GO:0098830]; terminal bouton [GO:0043195]; trans-Golgi network [GO:0005802]
O54781	SRPK2_MOUSE	reviewed	SRSF protein kinase 2 (EC 2.7.11.1) (SFRS protein kinase 2) (Serine/arginine-rich protein-specific kinase 2) (SR-protein-specific kinase 2) [Cleaved into: SRSF protein kinase 2 N-terminal; SRSF protein kinase 2 C-terminal]	Srpk2	Mus musculus (Mouse)	681	chromatin [GO:0000785]; cytoplasm [GO:0005737]; cytosol [GO:0005829]; nuclear speck [GO:0016607]; nucleolus [GO:0005730]; nucleoplasm [GO:0005654]; nucleus [GO:0005634]
O54828	RGS9_MOUSE	reviewed	Regulator of G-protein signaling 9 (RGS9)	Rgs9	Mus musculus (Mouse)	675	cytoplasm [GO:0005737]; glutamatergic synapse [GO:0098978]; nucleus [GO:0005634]; postsynaptic density membrane [GO:0098839]
O54829	RGS7_MOUSE	reviewed	Regulator of G-protein signaling 7 (RGS7)	Rgs7	Mus musculus (Mouse)	469	cytoplasm [GO:0005737]; cytosol [GO:0005829]; dendrite terminus [GO:0044292]; glutamatergic synapse [GO:0098978]; membrane raft [GO:0045121]; nuclear envelope [GO:0005635]; nucleus [GO:0005634]; plasma membrane [GO:0005886]; postsynaptic membrane [GO:0045211]; presynapse [GO:0098793]; protein-containing complex [GO:0032991]
O54833	CSK22_MOUSE	reviewed	Casein kinase II subunit alpha' (CK II alpha') (EC 2.7.11.1)	Csnk2a2	Mus musculus (Mouse)	350	acrosomal vesicle [GO:0001669]; chromatin [GO:0000785]; cytoplasm [GO:0005737]; cytosol [GO:0005829]; nucleus [GO:0005634]; PcG protein complex [GO:0031519]; plasma membrane [GO:0005886]; protein kinase CK2 complex [GO:0005956]
O54865	GCYB1_MOUSE	reviewed	Guanylate cyclase soluble subunit beta-1 (GCS-beta-1) (EC 4.6.1.2) (Guanylate cyclase soluble subunit beta-3) (GCS-beta-3) (Soluble guanylate cyclase small subunit)	Gucy1b1 Gucy1b3	Mus musculus (Mouse)	620	cytoplasm [GO:0005737]; glutamatergic synapse [GO:0098978]; guanylate cyclase complex, soluble [GO:0008074]; presynaptic active zone [GO:0048786]; presynaptic active zone cytoplasmic component [GO:0098831]; protein-containing complex [GO:0032991]
O54901	OX2G_MOUSE	reviewed	OX-2 membrane glycoprotein (MRC OX-2 antigen) (CD antigen CD200)	Cd200 Mox2	Mus musculus (Mouse)	278	axon [GO:0030424]; cell body [GO:0044297]; cell surface [GO:0009986]; integral component of membrane [GO:0016021]; neuronal cell body [GO:0043025]; neuron projection [GO:0043005]; plasma membrane [GO:0005886]
O54916	REPS1_MOUSE	reviewed	RalBP1-associated Eps domain-containing protein 1 (RalBP1-interacting protein 1)	Reps1	Mus musculus (Mouse)	795	clathrin-coated pit [GO:0005905]; plasma membrane [GO:0005886]
O54946	DNJB6_MOUSE	reviewed	DnaJ homolog subfamily B member 6 (Heat shock protein J2) (HSJ-2) (MRJ) (mDj4)	Dnajb6 Hsj2 Mrj	Mus musculus (Mouse)	365	cytoplasm [GO:0005737]; cytosol [GO:0005829]; nucleoplasm [GO:0005654]; nucleus [GO:0005634]; perinuclear region of cytoplasm [GO:0048471]; Z disc [GO:0030018]
O54983	CRYM_MOUSE	reviewed	Ketimine reductase mu-crystallin (EC 1.5.1.25) (NADP-regulated thyroid-hormone-binding protein)	Crym	Mus musculus (Mouse)	313	cytoplasm [GO:0005737]; cytosol [GO:0005829]; mitochondrion [GO:0005739]; nucleus [GO:0005634]
O54988	SLK_MOUSE	reviewed	STE20-like serine/threonine-protein kinase (STE20-like kinase) (mSLK) (EC 2.7.11.1) (Etk4) (STE20-related kinase SMAK) (STE20-related serine/threonine-protein kinase) (STE20-related kinase) (Serine/threonine-protein kinase 2)	Slk Kiaa0204 Stk2	Mus musculus (Mouse)	1233	cell leading edge [GO:0031252]; cytoplasm [GO:0005737]; perinuclear region of cytoplasm [GO:0048471]
O54991	CNTP1_MOUSE	reviewed	Contactin-associated protein 1 (Caspr) (Caspr1) (MHDNIV) (NCP1) (Neurexin IV) (Neurexin-4) (Paranodin)	Cntnap1 Nrxn4	Mus musculus (Mouse)	1385	axon [GO:0030424]; integral component of membrane [GO:0016021]; myelin sheath [GO:0043209]; paranodal junction [GO:0033010]; paranode region of axon [GO:0033270]; plasma membrane [GO:0005886]; presynaptic active zone membrane [GO:0048787]; septate junction [GO:0005918]
O55003	BNIP3_MOUSE	reviewed	BCL2/adenovirus E1B 19 kDa protein-interacting protein 3	Bnip3 Nip3	Mus musculus (Mouse)	187	cytoplasm [GO:0005737]; dendrite [GO:0030425]; endoplasmic reticulum [GO:0005783]; integral component of mitochondrial outer membrane [GO:0031307]; mitochondrial membrane [GO:0031966]; mitochondrial outer membrane [GO:0005741]; mitochondrion [GO:0005739]; nuclear envelope [GO:0005635]; nucleoplasm [GO:0005654]; nucleus [GO:0005634]; postsynaptic density [GO:0014069]
O55013	TPPC3_MOUSE	reviewed	Trafficking protein particle complex subunit 3 (BET3 homolog)	Trappc3 Bet3	Mus musculus (Mouse)	180	cis-Golgi network membrane [GO:0033106]; cytosol [GO:0005829]; endoplasmic reticulum [GO:0005783]; Golgi apparatus [GO:0005794]; Golgi membrane [GO:0000139]; TRAPP complex [GO:0030008]
O55017	CAC1B_MOUSE	reviewed	Voltage-dependent N-type calcium channel subunit alpha-1B (Brain calcium channel III) (BIII) (Calcium channel, L type, alpha-1 polypeptide isoform 5) (Voltage-gated calcium channel subunit alpha Cav2.2)	Cacna1b Cach5 Cacnl1a5 Cchn1a	Mus musculus (Mouse)	2327	axon terminus [GO:0043679]; dendrite [GO:0030425]; dendritic shaft [GO:0043198]; glutamatergic synapse [GO:0098978]; membrane [GO:0016020]; neuronal cell body [GO:0043025]; neuron projection [GO:0043005]; plasma membrane [GO:0005886]; protein-containing complex [GO:0032991]; Schaffer collateral - CA1 synapse [GO:0098685]; voltage-gated calcium channel complex [GO:0005891]
O55022	PGRC1_MOUSE	reviewed	Membrane-associated progesterone receptor component 1 (mPR)	Pgrmc1 Pgrmc	Mus musculus (Mouse)	195	cell body [GO:0044297]; endomembrane system [GO:0012505]; endoplasmic reticulum membrane [GO:0005789]; integral component of membrane [GO:0016021]; membrane [GO:0016020]; mitochondrial outer membrane [GO:0005741]; neuronal cell body [GO:0043025]; neuron projection [GO:0043005]; synapse [GO:0045202]
O55023	IMPA1_MOUSE	reviewed	Inositol monophosphatase 1 (IMP 1) (IMPase 1) (EC 3.1.3.25) (D-galactose 1-phosphate phosphatase) (EC 3.1.3.94) (Inositol-1(or 4)-monophosphatase 1) (Lithium-sensitive myo-inositol monophosphatase A1)	Impa1	Mus musculus (Mouse)	277	axon [GO:0030424]; cytoplasm [GO:0005737]; neuronal cell body [GO:0043025]
O55029	COPB2_MOUSE	reviewed	Coatomer subunit beta' (Beta'-coat protein) (Beta'-COP) (p102)	Copb2	Mus musculus (Mouse)	905	COPI vesicle coat [GO:0030126]; cytosol [GO:0005829]; Golgi apparatus [GO:0005794]; Golgi membrane [GO:0000139]
O55033	NCK2_MOUSE	reviewed	Cytoplasmic protein NCK2 (Growth factor receptor-bound protein 4) (NCK adaptor protein 2) (Nck-2) (SH2/SH3 adaptor protein NCK-beta)	Nck2 Grb4	Mus musculus (Mouse)	380	cytoplasm [GO:0005737]; cytosol [GO:0005829]; endoplasmic reticulum [GO:0005783]; postsynaptic density [GO:0014069]; synapse [GO:0045202]; vesicle membrane [GO:0012506]
O55042	SYUA_MOUSE	reviewed	Alpha-synuclein (Non-A beta component of AD amyloid) (Non-A4 component of amyloid precursor) (NACP)	Snca Syn	Mus musculus (Mouse)	140	actin cytoskeleton [GO:0015629]; axon [GO:0030424]; axon terminus [GO:0043679]; cell cortex [GO:0005938]; cytoplasm [GO:0005737]; cytoplasmic vesicle membrane [GO:0030659]; cytoskeleton [GO:0005856]; cytosol [GO:0005829]; extracellular region [GO:0005576]; extracellular space [GO:0005615]; Golgi apparatus [GO:0005794]; growth cone [GO:0030426]; inclusion body [GO:0016234]; intracellular membrane-…
O55091	IMPCT_MOUSE	reviewed	Protein IMPACT (Imprinted and ancient gene protein)	Impact	Mus musculus (Mouse)	318	cytosol [GO:0005829]; polysome [GO:0005844]
O55100	SNG1_MOUSE	reviewed	Synaptogyrin-1	Syngr1	Mus musculus (Mouse)	234	integral component of synaptic vesicle membrane [GO:0030285]; melanosome [GO:0042470]; neuromuscular junction [GO:0031594]; synaptic vesicle [GO:0008021]; synaptic vesicle membrane [GO:0030672]
O55106	STRN_MOUSE	reviewed	Striatin	Strn	Mus musculus (Mouse)	780	bicellular tight junction [GO:0005923]; cytoplasm [GO:0005737]; dendrite [GO:0030425]; dendritic spine [GO:0043197]; FAR/SIN/STRIPAK complex [GO:0090443]; membrane [GO:0016020]; neuronal cell body [GO:0043025]; postsynaptic density [GO:0014069]; postsynaptic membrane [GO:0045211]; protein-containing complex [GO:0032991]
O55125	NIPS1_MOUSE	reviewed	Protein NipSnap homolog 1 (NipSnap1)	Nipsnap1	Mus musculus (Mouse)	284	membrane [GO:0016020]; mitochondrial inner membrane [GO:0005743]; mitochondrion [GO:0005739]; synaptic membrane [GO:0097060]
O55126	NIPS2_MOUSE	reviewed	Protein NipSnap homolog 2 (NipSnap2) (Glioblastoma-amplified sequence)	Nipsnap2 Gbas	Mus musculus (Mouse)	281	cytoplasm [GO:0005737]; mitochondrial outer membrane [GO:0005741]; mitochondrion [GO:0005739]
O55131	SEPT7_MOUSE	reviewed	Septin-7 (CDC10 protein homolog)	Septin7 Cdc10 Sept7	Mus musculus (Mouse)	436	axoneme [GO:0005930]; axon terminus [GO:0043679]; cell body [GO:0044297]; cell cortex [GO:0005938]; cell division site [GO:0032153]; cleavage furrow [GO:0032154]; glutamatergic synapse [GO:0098978]; kinetochore [GO:0000776]; membrane [GO:0016020]; microtubule cytoskeleton [GO:0015630]; midbody [GO:0030496]; myelin sheath [GO:0043209]; neuron projection [GO:0043005]; non-motile cilium [GO:0097730]…
O55142	RL35A_MOUSE	reviewed	60S ribosomal protein L35a	Rpl35a	Mus musculus (Mouse)	110	cytosol [GO:0005829]; cytosolic large ribosomal subunit [GO:0022625]; cytosolic ribosome [GO:0022626]; mitochondrion [GO:0005739]
O55143	AT2A2_MOUSE	reviewed	Sarcoplasmic/endoplasmic reticulum calcium ATPase 2 (SERCA2) (SR Ca(2+)-ATPase 2) (EC 7.2.2.10) (Calcium pump 2) (Calcium-transporting ATPase sarcoplasmic reticulum type, slow twitch skeletal muscle isoform) (Endoplasmic reticulum class 1/2 Ca(2+) ATPase)	Atp2a2	Mus musculus (Mouse)	1044	apical ectoplasmic specialization [GO:0061831]; calcium ion-transporting ATPase complex [GO:0090534]; endoplasmic reticulum [GO:0005783]; endoplasmic reticulum membrane [GO:0005789]; extrinsic component of cytoplasmic side of plasma membrane [GO:0031234]; longitudinal sarcoplasmic reticulum [GO:0014801]; membrane [GO:0016020]; perinuclear region of cytoplasm [GO:0048471]; plasma membrane bounded …
O55201	SPT5H_MOUSE	reviewed	Transcription elongation factor SPT5 (DRB sensitivity-inducing factor large subunit) (DSIF large subunit)	Supt5h Supt5	Mus musculus (Mouse)	1082	DSIF complex [GO:0032044]; nucleoplasm [GO:0005654]; nucleus [GO:0005634]
O55234	PSB5_MOUSE	reviewed	Proteasome subunit beta type-5 (EC 3.4.25.1) (Macropain epsilon chain) (Multicatalytic endopeptidase complex epsilon chain) (Proteasome chain 6) (Proteasome epsilon chain) (Proteasome subunit X)	Psmb5	Mus musculus (Mouse)	264	centrosome [GO:0005813]; cytoplasm [GO:0005737]; cytosol [GO:0005829]; nucleoplasm [GO:0005654]; nucleus [GO:0005634]; proteasome complex [GO:0000502]; proteasome core complex [GO:0005839]; proteasome core complex, beta-subunit complex [GO:0019774]
O70133	DHX9_MOUSE	reviewed	ATP-dependent RNA helicase A (EC 3.6.4.13) (DEAH box protein 9) (mHEL-5) (Nuclear DNA helicase II) (NDH II) (RNA helicase A) (RHA)	Dhx9 Ddx9	Mus musculus (Mouse)	1380	actin cytoskeleton [GO:0015629]; centrosome [GO:0005813]; CRD-mediated mRNA stability complex [GO:0070937]; cytoplasm [GO:0005737]; cytoplasmic ribonucleoprotein granule [GO:0036464]; nuclear body [GO:0016604]; nuclear stress granule [GO:0097165]; nucleolus [GO:0005730]; nucleoplasm [GO:0005654]; nucleus [GO:0005634]; perichromatin fibrils [GO:0005726]; polysomal ribosome [GO:0042788]; polysome […
O70152	DPM1_MOUSE	reviewed	Dolichol-phosphate mannosyltransferase subunit 1 (EC 2.4.1.83) (Dolichol-phosphate mannose synthase subunit 1) (DPM synthase subunit 1) (Dolichyl-phosphate beta-D-mannosyltransferase subunit 1) (Mannose-P-dolichol synthase subunit 1) (MPD synthase)	Dpm1	Mus musculus (Mouse)	260	dolichol-phosphate-mannose synthase complex [GO:0033185]; endoplasmic reticulum [GO:0005783]; endoplasmic reticulum membrane [GO:0005789]; intracellular membrane-bounded organelle [GO:0043231]; membrane [GO:0016020]
O70161	PI51C_MOUSE	reviewed	Phosphatidylinositol 4-phosphate 5-kinase type-1 gamma (PIP5K1-gamma) (PtdIns(4)P-5-kinase 1 gamma) (EC 2.7.1.68) (Phosphatidylinositol 4-phosphate 5-kinase type I gamma) (PIP5KIgamma)	Pip5k1c Kiaa0589	Mus musculus (Mouse)	661	adherens junction [GO:0005912]; cytosol [GO:0005829]; endosome membrane [GO:0010008]; focal adhesion [GO:0005925]; glutamatergic synapse [GO:0098978]; nucleoplasm [GO:0005654]; phagocytic cup [GO:0001891]; postsynaptic density [GO:0014069]; presynaptic endocytic zone membrane [GO:0098835]; ruffle membrane [GO:0032587]; uropod [GO:0001931]
O70166	STMN3_MOUSE	reviewed	Stathmin-3 (Hippocampus abundant transcript 3) (SCG10-like protein) (SCG10-related protein HiAT3)	Stmn3 Sclip	Mus musculus (Mouse)	180	cytoplasm [GO:0005737]; cytosol [GO:0005829]; Golgi apparatus [GO:0005794]; growth cone [GO:0030426]; neuron projection [GO:0043005]; perinuclear region of cytoplasm [GO:0048471]
O70172	PI42A_MOUSE	reviewed	Phosphatidylinositol 5-phosphate 4-kinase type-2 alpha (EC 2.7.1.149) (1-phosphatidylinositol 5-phosphate 4-kinase 2-alpha) (Diphosphoinositide kinase 2-alpha) (Phosphatidylinositol 5-Phosphate 4-Kinase) (PI5P4Kalpha) (Phosphatidylinositol 5-phosphate 4-kinase type II alpha) (PI(5)P 4-kinase type II alpha) (PIP4KII-alpha) (PtdIns(5)P-4-kinase isoform 2-alpha)	Pip4k2a Pi5p4ka Pip5k2a	Mus musculus (Mouse)	405	autophagosome [GO:0005776]; cytosol [GO:0005829]; lysosome [GO:0005764]; nucleus [GO:0005634]; photoreceptor inner segment [GO:0001917]; photoreceptor outer segment [GO:0001750]; plasma membrane [GO:0005886]
O70194	EIF3D_MOUSE	reviewed	Eukaryotic translation initiation factor 3 subunit D (eIF3d) (Eukaryotic translation initiation factor 3 subunit 7) (eIF-3-zeta) (eIF3 p66)	Eif3d Eif3s7	Mus musculus (Mouse)	548	eukaryotic 43S preinitiation complex [GO:0016282]; eukaryotic 48S preinitiation complex [GO:0033290]; eukaryotic translation initiation factor 3 complex [GO:0005852]; eukaryotic translation initiation factor 3 complex, eIF3m [GO:0071541]
O70228	ATP9A_MOUSE	reviewed	Probable phospholipid-transporting ATPase IIA (EC 7.6.2.1) (ATPase class II type 9A)	Atp9a	Mus musculus (Mouse)	1047	early endosome [GO:0005769]; early endosome membrane [GO:0031901]; endosome [GO:0005768]; integral component of membrane [GO:0016021]; perinuclear region of cytoplasm [GO:0048471]; plasma membrane [GO:0005886]; recycling endosome [GO:0055037]; recycling endosome membrane [GO:0055038]; trans-Golgi network [GO:0005802]; trans-Golgi network membrane [GO:0032588]
O70250	PGAM2_MOUSE	reviewed	Phosphoglycerate mutase 2 (EC 5.4.2.11) (EC 5.4.2.4) (BPG-dependent PGAM 2) (Muscle-specific phosphoglycerate mutase) (Phosphoglycerate mutase isozyme M) (PGAM-M)	Pgam2	Mus musculus (Mouse)	253	cytosol [GO:0005829]; nucleus [GO:0005634]
O70252	HMOX2_MOUSE	reviewed	Heme oxygenase 2 (HO-2) (EC 1.14.14.18)	Hmox2	Mus musculus (Mouse)	315	endoplasmic reticulum [GO:0005783]; plasma membrane [GO:0005886]
O70305	ATX2_MOUSE	reviewed	Ataxin-2 (Spinocerebellar ataxia type 2 protein homolog)	Atxn2 Atx2 Sca2	Mus musculus (Mouse)	1285	cytoplasm [GO:0005737]; cytoplasmic stress granule [GO:0010494]; cytosol [GO:0005829]; Golgi apparatus [GO:0005794]; perinuclear region of cytoplasm [GO:0048471]; polysome [GO:0005844]; ribonucleoprotein complex [GO:1990904]; trans-Golgi network [GO:0005802]
O70310	NMT1_MOUSE	reviewed	Glycylpeptide N-tetradecanoyltransferase 1 (EC 2.3.1.97) (Myristoyl-CoA:protein N-myristoyltransferase 1) (NMT 1) (Type I N-myristoyltransferase) (Peptide N-myristoyltransferase 1)	Nmt1	Mus musculus (Mouse)	496	cytoplasm [GO:0005737]; cytosol [GO:0005829]; extrinsic component of membrane [GO:0019898]; plasma membrane [GO:0005886]
O70311	NMT2_MOUSE	reviewed	Glycylpeptide N-tetradecanoyltransferase 2 (EC 2.3.1.97) (Myristoyl-CoA:protein N-myristoyltransferase 2) (NMT 2) (Peptide N-myristoyltransferase 2) (Type II N-myristoyltransferase)	Nmt2	Mus musculus (Mouse)	529	cytoplasm [GO:0005737]; cytosol [GO:0005829]; extrinsic component of membrane [GO:0019898]; Golgi apparatus [GO:0005794]; plasma membrane [GO:0005886]
O70318	E41L2_MOUSE	reviewed	Band 4.1-like protein 2 (Erythrocyte membrane protein band 4.1-like 2) (Generally expressed protein 4.1) (4.1G)	Epb41l2 Epb4.1l2	Mus musculus (Mouse)	988	actin cytoskeleton [GO:0015629]; cell cortex region [GO:0099738]; cell junction [GO:0030054]; COP9 signalosome [GO:0008180]; cytoskeleton [GO:0005856]; nucleoplasm [GO:0005654]; plasma membrane [GO:0005886]
O70325	GPX4_MOUSE	reviewed	Phospholipid hydroperoxide glutathione peroxidase (PHGPx) (EC 1.11.1.12) (Glutathione peroxidase 4) (GPx-4) (GSHPx-4)	Gpx4	Mus musculus (Mouse)	197	cytosol [GO:0005829]; mitochondrial inner membrane [GO:0005743]; mitochondrion [GO:0005739]; nuclear envelope [GO:0005635]; nucleus [GO:0005634]; protein-containing complex [GO:0032991]
O70433	FHL2_MOUSE	reviewed	Four and a half LIM domains protein 2 (FHL-2) (Skeletal muscle LIM-protein 3) (SLIM-3)	Fhl2	Mus musculus (Mouse)	279	M band [GO:0031430]; nucleus [GO:0005634]; Z disc [GO:0030018]
O70435	PSA3_MOUSE	reviewed	Proteasome subunit alpha type-3 (Macropain subunit C8) (Multicatalytic endopeptidase complex subunit C8) (Proteasome component C8) (Proteasome subunit K)	Psma3	Mus musculus (Mouse)	255	cytoplasm [GO:0005737]; cytosol [GO:0005829]; nucleoplasm [GO:0005654]; nucleus [GO:0005634]; proteasome complex [GO:0000502]; proteasome core complex [GO:0005839]; proteasome core complex, alpha-subunit complex [GO:0019773]; synapse [GO:0045202]
O70439	STX7_MOUSE	reviewed	Syntaxin-7	Stx7 Syn7	Mus musculus (Mouse)	261	azurophil granule [GO:0042582]; early endosome [GO:0005769]; early endosome membrane [GO:0031901]; endocytic vesicle [GO:0030139]; endomembrane system [GO:0012505]; endosome [GO:0005768]; immunological synapse [GO:0001772]; integral component of membrane [GO:0016021]; integral component of synaptic vesicle membrane [GO:0030285]; late endosome [GO:0005770]; late endosome membrane [GO:0031902]; lys…
O70443	GNAZ_MOUSE	reviewed	Guanine nucleotide-binding protein G(z) subunit alpha (G(x) alpha chain) (Gz-alpha)	Gnaz	Mus musculus (Mouse)	355	cell body [GO:0044297]; cytosol [GO:0005829]; dendrite [GO:0030425]; heterotrimeric G-protein complex [GO:0005834]; membrane [GO:0016020]; plasma membrane [GO:0005886]
O70481	UBR1_MOUSE	reviewed	E3 ubiquitin-protein ligase UBR1 (EC 2.3.2.27) (N-recognin-1) (RING-type E3 ubiquitin transferase UBR1) (Ubiquitin-protein ligase E3-alpha-1) (Ubiquitin-protein ligase E3-alpha-I)	Ubr1	Mus musculus (Mouse)	1757	cytoplasm [GO:0005737]; cytosol [GO:0005829]; proteasome complex [GO:0000502]; ubiquitin ligase complex [GO:0000151]
O70492	SNX3_MOUSE	reviewed	Sorting nexin-3 (SDP3 protein)	Snx3	Mus musculus (Mouse)	162	clathrin-coated vesicle [GO:0030136]; cytoplasm [GO:0005737]; cytosol [GO:0005829]; early endosome [GO:0005769]; early endosome membrane [GO:0031901]; early phagosome [GO:0032009]; endosome membrane [GO:0010008]; retromer complex [GO:0030904]
O70493	SNX12_MOUSE	reviewed	Sorting nexin-12 (SDP8 protein)	Snx12	Mus musculus (Mouse)	165	early endosome [GO:0005769]; early endosome membrane [GO:0031901]; retromer complex [GO:0030904]
O70503	DHB12_MOUSE	reviewed	Very-long-chain 3-oxoacyl-CoA reductase (EC 1.1.1.330) (17-beta-hydroxysteroid dehydrogenase 12) (17-beta-HSD 12) (3-ketoacyl-CoA reductase) (KAR) (Estradiol 17-beta-dehydrogenase 12) (EC 1.1.1.62) (KIK-I)	Hsd17b12 Kik1	Mus musculus (Mouse)	312	extracellular matrix [GO:0031012]; fatty acid elongase complex [GO:0009923]; integral component of membrane [GO:0016021]
O70566	DIAP2_MOUSE	reviewed	Protein diaphanous homolog 2 (Diaphanous-related formin-2) (DRF2) (mDia3)	Diaph2 Diap2	Mus musculus (Mouse)	1098
O70589	CSKP_MOUSE	reviewed	Peripheral plasma membrane protein CASK (EC 2.7.11.1) (Calcium/calmodulin-dependent serine protein kinase)	Cask Lin-2	Mus musculus (Mouse)	926	apical dendrite [GO:0097440]; basement membrane [GO:0005604]; basolateral plasma membrane [GO:0016323]; cell-cell junction [GO:0005911]; ciliary membrane [GO:0060170]; cytoplasm [GO:0005737]; cytosol [GO:0005829]; dendrite [GO:0030425]; membrane [GO:0016020]; membrane raft [GO:0045121]; neuronal cell body [GO:0043025]; nuclear lamina [GO:0005652]; nuclear matrix [GO:0016363]; nucleolus [GO:000573…
O70591	PFD2_MOUSE	reviewed	Prefoldin subunit 2	Pfdn2 Pfd2	Mus musculus (Mouse)	154	cytoplasm [GO:0005737]; cytosol [GO:0005829]; mitochondrion [GO:0005739]; nucleus [GO:0005634]; prefoldin complex [GO:0016272]
O88196	TTC3_MOUSE	reviewed	E3 ubiquitin-protein ligase TTC3 (EC 2.3.2.27) (RING-type E3 ubiquitin transferase TTC3) (TPR repeat protein D) (Mtprd)	Ttc3 Kiaa4119	Mus musculus (Mouse)	1979	cytosol [GO:0005829]; Golgi apparatus [GO:0005794]; nucleolus [GO:0005730]; nucleoplasm [GO:0005654]; nucleus [GO:0005634]; vacuole [GO:0005773]
O88291	ZN326_MOUSE	reviewed	DBIRD complex subunit ZNF326 (Zinc finger protein 326) (Zinc finger protein interacting with mRNPs) (Zinc finger protein-associated with nuclear matrix of 75 kDa)	Znf326 Zan75 Zfp326 Zird	Mus musculus (Mouse)	580	DBIRD complex [GO:0044609]; intracellular membrane-bounded organelle [GO:0043231]; nuclear matrix [GO:0016363]; nucleoplasm [GO:0005654]; nucleus [GO:0005634]
O88342	WDR1_MOUSE	reviewed	WD repeat-containing protein 1 (Actin-interacting protein 1) (AIP1)	Wdr1	Mus musculus (Mouse)	606	actin cytoskeleton [GO:0015629]; cell-cell junction [GO:0005911]; cell junction [GO:0030054]; cell projection [GO:0042995]; cortical actin cytoskeleton [GO:0030864]; myelin sheath [GO:0043209]; plasma membrane [GO:0005886]; podosome [GO:0002102]
O88343	S4A4_MOUSE	reviewed	Electrogenic sodium bicarbonate cotransporter 1 (Sodium bicarbonate cotransporter) (Na(+)/HCO3(-) cotransporter) (Solute carrier family 4 member 4)	Slc4a4 Nbc1 Nbce1	Mus musculus (Mouse)	1079	basolateral plasma membrane [GO:0016323]; cell surface [GO:0009986]; integral component of plasma membrane [GO:0005887]; membrane [GO:0016020]; plasma membrane [GO:0005886]
O88384	VTI1B_MOUSE	reviewed	Vesicle transport through interaction with t-SNAREs homolog 1B (Vesicle transport v-SNARE protein Vti1-like 1) (Vti1-rp1)	Vti1b Vti1l1	Mus musculus (Mouse)	232	anchored component of membrane [GO:0031225]; cytosol [GO:0005829]; early endosome membrane [GO:0031901]; endoplasmic reticulum membrane [GO:0005789]; ER to Golgi transport vesicle membrane [GO:0012507]; Golgi apparatus [GO:0005794]; integral component of membrane [GO:0016021]; intracellular membrane-bounded organelle [GO:0043231]; late endosome membrane [GO:0031902]; lysosomal membrane [GO:000576…
O88444	ADCY1_MOUSE	reviewed	Adenylate cyclase type 1 (EC 4.6.1.1) (ATP pyrophosphate-lyase 1) (Adenylate cyclase type I) (Adenylyl cyclase 1) (Ca(2+)/calmodulin-activated adenylyl cyclase)	Adcy1	Mus musculus (Mouse)	1118	cytoplasm [GO:0005737]; glutamatergic synapse [GO:0098978]; hippocampal mossy fiber to CA3 synapse [GO:0098686]; integral component of plasma membrane [GO:0005887]; integral component of postsynaptic density membrane [GO:0099061]; membrane raft [GO:0045121]; nucleus [GO:0005634]; plasma membrane [GO:0005886]; postsynaptic density [GO:0014069]; Schaffer collateral - CA1 synapse [GO:0098685]
O88447	KLC1_MOUSE	reviewed	Kinesin light chain 1 (KLC 1)	Klc1 Kns2	Mus musculus (Mouse)	541	axon [GO:0030424]; ciliary rootlet [GO:0035253]; cytoplasm [GO:0005737]; cytoplasmic vesicle [GO:0031410]; cytosol [GO:0005829]; growth cone [GO:0030426]; kinesin complex [GO:0005871]; membrane [GO:0016020]; membrane-bounded organelle [GO:0043227]; microtubule [GO:0005874]; neuronal cell body [GO:0043025]; neuron projection [GO:0043005]; vesicle [GO:0031982]
O88448	KLC2_MOUSE	reviewed	Kinesin light chain 2 (KLC 2)	Klc2	Mus musculus (Mouse)	599	ciliary rootlet [GO:0035253]; cytoplasm [GO:0005737]; cytosol [GO:0005829]; kinesin complex [GO:0005871]; lysosomal membrane [GO:0005765]; microtubule [GO:0005874]; mitochondrion [GO:0005739]; neuron projection [GO:0043005]; nucleoplasm [GO:0005654]; plasma membrane [GO:0005886]; protein-containing complex [GO:0032991]
O88455	DHCR7_MOUSE	reviewed	7-dehydrocholesterol reductase (7-DHC reductase) (EC 1.3.1.21) (Sterol Delta(7)-reductase)	Dhcr7	Mus musculus (Mouse)	471	endoplasmic reticulum [GO:0005783]; integral component of endoplasmic reticulum membrane [GO:0030176]; intracellular membrane-bounded organelle [GO:0043231]; nuclear outer membrane [GO:0005640]
O88485	DC1I1_MOUSE	reviewed	Cytoplasmic dynein 1 intermediate chain 1 (Cytoplasmic dynein intermediate chain 1) (Dynein intermediate chain 1, cytosolic) (DH IC-1)	Dync1i1 Dnci1 Dncic1	Mus musculus (Mouse)	628	axon cytoplasm [GO:1904115]; cytoplasm [GO:0005737]; cytoplasmic dynein complex [GO:0005868]; cytoplasmic ribonucleoprotein granule [GO:0036464]; kinetochore [GO:0000776]; microtubule [GO:0005874]; nucleus [GO:0005634]; perinuclear region of cytoplasm [GO:0048471]; recycling endosome [GO:0055037]; spindle pole [GO:0000922]; vesicle [GO:0031982]
O88487	DC1I2_MOUSE	reviewed	Cytoplasmic dynein 1 intermediate chain 2 (Cytoplasmic dynein intermediate chain 2) (Dynein intermediate chain 2, cytosolic) (DH IC-2)	Dync1i2 Dnci2 Dncic2	Mus musculus (Mouse)	612	cytoplasm [GO:0005737]; cytoplasmic dynein complex [GO:0005868]; microtubule [GO:0005874]; outer dynein arm [GO:0036157]; vesicle [GO:0031982]
O88532	ZFR_MOUSE	reviewed	Zinc finger RNA-binding protein	Zfr	Mus musculus (Mouse)	1074	chromosome [GO:0005694]; cytoplasm [GO:0005737]; nucleus [GO:0005634]
O88543	CSN3_MOUSE	reviewed	COP9 signalosome complex subunit 3 (SGN3) (Signalosome subunit 3) (JAB1-containing signalosome subunit 3)	Cops3 Csn3	Mus musculus (Mouse)	423	COP9 signalosome [GO:0008180]; cytosol [GO:0005829]; nucleoplasm [GO:0005654]
O88544	CSN4_MOUSE	reviewed	COP9 signalosome complex subunit 4 (SGN4) (Signalosome subunit 4) (JAB1-containing signalosome subunit 4)	Cops4 Csn4	Mus musculus (Mouse)	406	cell junction [GO:0030054]; COP9 signalosome [GO:0008180]; cytosol [GO:0005829]; nuclear speck [GO:0016607]; synaptic vesicle [GO:0008021]
O88569	ROA2_MOUSE	reviewed	Heterogeneous nuclear ribonucleoproteins A2/B1 (hnRNP A2/B1)	Hnrnpa2b1 Hnrpa2b1	Mus musculus (Mouse)	353	Cajal body [GO:0015030]; catalytic step 2 spliceosome [GO:0071013]; chromatin [GO:0000785]; chromosome, telomeric region [GO:0000781]; cytoplasm [GO:0005737]; extracellular exosome [GO:0070062]; glutamatergic synapse [GO:0098978]; neuronal cell body [GO:0043025]; neuronal ribonucleoprotein granule [GO:0071598]; neuron projection [GO:0043005]; nuclear matrix [GO:0016363]; nucleoplasm [GO:0005654];…
O88597	BECN1_MOUSE	reviewed	Beclin-1 (Coiled-coil myosin-like BCL2-interacting protein) [Cleaved into: Beclin-1-C 35 kDa; Beclin-1-C 37 kDa]	Becn1	Mus musculus (Mouse)	448	autophagosome [GO:0005776]; cytoplasm [GO:0005737]; cytoplasmic vesicle [GO:0031410]; cytoskeleton [GO:0005856]; cytosol [GO:0005829]; dendrite [GO:0030425]; endoplasmic reticulum [GO:0005783]; endoplasmic reticulum membrane [GO:0005789]; endosome [GO:0005768]; endosome membrane [GO:0010008]; extrinsic component of membrane [GO:0019898]; membrane [GO:0016020]; mitochondrial membrane [GO:0031966];…
O88643	PAK1_MOUSE	reviewed	Serine/threonine-protein kinase PAK 1 (EC 2.7.11.1) (Alpha-PAK) (CDC42/RAC effector kinase PAK-A) (p21-activated kinase 1) (PAK-1) (p65-PAK)	Pak1 Paka	Mus musculus (Mouse)	545	actin filament [GO:0005884]; axon [GO:0030424]; cell-cell junction [GO:0005911]; chromosome [GO:0005694]; cytoplasm [GO:0005737]; cytosol [GO:0005829]; dendrite [GO:0030425]; focal adhesion [GO:0005925]; GABA-ergic synapse [GO:0098982]; glutamatergic synapse [GO:0098978]; growth cone [GO:0030426]; intercalated disc [GO:0014704]; lamellipodium [GO:0030027]; membrane [GO:0016020]; microtubule organ…
O88685	PRS6A_MOUSE	reviewed	26S proteasome regulatory subunit 6A (26S proteasome AAA-ATPase subunit RPT5) (Proteasome 26S subunit ATPase 3) (Tat-binding protein 1) (TBP-1)	Psmc3 Tbp1	Mus musculus (Mouse)	442	cytoplasm [GO:0005737]; nucleus [GO:0005634]; P-body [GO:0000932]; perinuclear region of cytoplasm [GO:0048471]; proteasome accessory complex [GO:0022624]; proteasome complex [GO:0000502]; proteasome regulatory particle, base subcomplex [GO:0008540]
O88696	CLPP_MOUSE	reviewed	ATP-dependent Clp protease proteolytic subunit, mitochondrial (EC 3.4.21.92) (Endopeptidase Clp)	Clpp	Mus musculus (Mouse)	272	endopeptidase Clp complex [GO:0009368]; mitochondrial matrix [GO:0005759]; mitochondrion [GO:0005739]
O88703	HCN2_MOUSE	reviewed	Potassium/sodium hyperpolarization-activated cyclic nucleotide-gated channel 2 (Brain cyclic nucleotide-gated channel 2) (BCNG-2) (Hyperpolarization-activated cation channel 1) (HAC-1)	Hcn2 Bcng2 Hac1	Mus musculus (Mouse)	863	axon [GO:0030424]; cytoplasm [GO:0005737]; dendrite membrane [GO:0032590]; dendritic shaft [GO:0043198]; HCN channel complex [GO:0098855]; integral component of plasma membrane [GO:0005887]; membrane [GO:0016020]; neuronal cell body [GO:0043025]; plasma membrane [GO:0005886]; somatodendritic compartment [GO:0036477]; synapse [GO:0045202]
O88704	HCN1_MOUSE	reviewed	Potassium/sodium hyperpolarization-activated cyclic nucleotide-gated channel 1 (Brain cyclic nucleotide-gated channel 1) (BCNG-1) (Hyperpolarization-activated cation channel 2) (HAC-2)	Hcn1 Bcng1 Hac2	Mus musculus (Mouse)	910	apical dendrite [GO:0097440]; axon [GO:0030424]; axon terminus [GO:0043679]; basolateral plasma membrane [GO:0016323]; cell surface [GO:0009986]; cytoplasm [GO:0005737]; dendrite [GO:0030425]; dendrite membrane [GO:0032590]; dendritic shaft [GO:0043198]; HCN channel complex [GO:0098855]; integral component of plasma membrane [GO:0005887]; neuronal cell body [GO:0043025]; plasma membrane [GO:00058…
O88705	HCN3_MOUSE	reviewed	Potassium/sodium hyperpolarization-activated cyclic nucleotide-gated channel 3 (Hyperpolarization-activated cation channel 3) (HAC-3)	Hcn3 Hac3	Mus musculus (Mouse)	779	axon [GO:0030424]; cone cell pedicle [GO:0044316]; dendrite [GO:0030425]; integral component of plasma membrane [GO:0005887]; neuronal cell body [GO:0043025]; plasma membrane [GO:0005886]; synapse [GO:0045202]
O88712	CTBP1_MOUSE	reviewed	C-terminal-binding protein 1 (CtBP1) (EC 1.1.1.-)	Ctbp1	Mus musculus (Mouse)	441	cytoplasm [GO:0005737]; GABA-ergic synapse [GO:0098982]; glutamatergic synapse [GO:0098978]; nucleoplasm [GO:0005654]; nucleus [GO:0005634]; presynapse [GO:0098793]; presynaptic active zone cytoplasmic component [GO:0098831]; transcription repressor complex [GO:0017053]
O88737	BSN_MOUSE	reviewed	Protein bassoon	Bsn Kiaa0434	Mus musculus (Mouse)	3942	axon [GO:0030424]; axon cytoplasm [GO:1904115]; cell surface [GO:0009986]; cytoskeleton of presynaptic active zone [GO:0048788]; cytosol [GO:0005829]; dendrite [GO:0030425]; excitatory synapse [GO:0060076]; extrinsic component of membrane [GO:0019898]; GABA-ergic synapse [GO:0098982]; glutamatergic synapse [GO:0098978]; Golgi-associated vesicle [GO:0005798]; hippocampal mossy fiber to CA3 synapse…
O88738	BIRC6_MOUSE	reviewed	Baculoviral IAP repeat-containing protein 6 (EC 2.3.2.27) (BIR repeat-containing ubiquitin-conjugating enzyme) (BRUCE) (RING-type E3 ubiquitin transferase BIRC6) (Ubiquitin-conjugating BIR domain enzyme apollon) (APOLLON)	Birc6 Kiaa1289	Mus musculus (Mouse)	4882	endosome [GO:0005768]; Flemming body [GO:0090543]; membrane [GO:0016020]; microtubule organizing center [GO:0005815]; midbody [GO:0030496]; nucleus [GO:0005634]; spindle pole [GO:0000922]; trans-Golgi network [GO:0005802]
O88741	GDAP1_MOUSE	reviewed	Ganglioside-induced differentiation-associated protein 1 (GDAP1)	Gdap1	Mus musculus (Mouse)	358	cytosol [GO:0005829]; integral component of mitochondrial outer membrane [GO:0031307]; mitochondrion [GO:0005739]
O88809	DCX_MOUSE	reviewed	Neuronal migration protein doublecortin (Doublin) (Lissencephalin-X) (Lis-X)	Dcx Dcn	Mus musculus (Mouse)	366	axon [GO:0030424]; axoneme [GO:0005930]; cytoplasm [GO:0005737]; dendrite [GO:0030425]; growth cone [GO:0030426]; microtubule [GO:0005874]; neuronal cell body [GO:0043025]; neuron projection [GO:0043005]
O88811	STAM2_MOUSE	reviewed	Signal transducing adapter molecule 2 (STAM-2) (Hrs-binding protein)	Stam2 Hbp	Mus musculus (Mouse)	523	cytoplasm [GO:0005737]; cytosol [GO:0005829]; early endosome membrane [GO:0031901]; endocytic vesicle [GO:0030139]; intracellular membrane-bounded organelle [GO:0043231]; nucleoplasm [GO:0005654]
O88834	SHD_MOUSE	reviewed	SH2 domain-containing adapter protein D	Shd	Mus musculus (Mouse)	343
O88844	IDHC_MOUSE	reviewed	Isocitrate dehydrogenase [NADP] cytoplasmic (IDH) (EC 1.1.1.42) (Cytosolic NADP-isocitrate dehydrogenase) (IDP) (NADP(+)-specific ICDH) (Oxalosuccinate decarboxylase)	Idh1	Mus musculus (Mouse)	414	cytoplasm [GO:0005737]; cytosol [GO:0005829]; mitochondrion [GO:0005739]; peroxisome [GO:0005777]
O88845	AKA10_MOUSE	reviewed	A-kinase anchor protein 10, mitochondrial (AKAP-10) (Dual specificity A kinase-anchoring protein 2) (D-AKAP-2) (Protein kinase A-anchoring protein 10) (PRKA10)	Akap10	Mus musculus (Mouse)	662	cytosol [GO:0005829]; mitochondrion [GO:0005739]; plasma membrane [GO:0005886]; protein-containing complex [GO:0032991]
O88910	MPP3_MOUSE	reviewed	MAGUK p55 subfamily member 3 (Discs large homolog 3) (Protein MPP3)	Mpp3 Dlgh3	Mus musculus (Mouse)	568
O88935	SYN1_MOUSE	reviewed	Synapsin-1 (Synapsin I)	Syn1 Syn-1	Mus musculus (Mouse)	706	anchored component of synaptic vesicle membrane [GO:0098993]; axon [GO:0030424]; clathrin-sculpted glutamate transport vesicle membrane [GO:0060203]; cytoskeleton [GO:0005856]; cytosol [GO:0005829]; dendrite [GO:0030425]; extrinsic component of synaptic vesicle membrane [GO:0098850]; Golgi apparatus [GO:0005794]; intracellular organelle [GO:0043229]; myelin sheath [GO:0043209]; postsynaptic densi…
O88951	LIN7B_MOUSE	reviewed	Protein lin-7 homolog B (Lin-7B) (Mammalian lin-seven protein 2) (MALS-2) (Vertebrate lin-7 homolog 2) (Veli-2)	Lin7b Mals2 Veli2	Mus musculus (Mouse)	207	basolateral plasma membrane [GO:0016323]; bicellular tight junction [GO:0005923]; cell-cell junction [GO:0005911]; MPP7-DLG1-LIN7 complex [GO:0097025]; plasma membrane [GO:0005886]; postsynaptic density membrane [GO:0098839]; presynapse [GO:0098793]; synapse [GO:0045202]; transport vesicle membrane [GO:0030658]
O88983	STX8_MOUSE	reviewed	Syntaxin-8 (Syntaxin-like protein 3I35)	Stx8	Mus musculus (Mouse)	236	cytosol [GO:0005829]; early endosome [GO:0005769]; endomembrane system [GO:0012505]; endosome [GO:0005768]; integral component of membrane [GO:0016021]; late endosome [GO:0005770]; late endosome membrane [GO:0031902]; lysosomal membrane [GO:0005765]; perinuclear region of cytoplasm [GO:0048471]; phagocytic vesicle [GO:0045335]; recycling endosome [GO:0055037]; SNARE complex [GO:0031201]; trans-Go…
O88998	NOE1_MOUSE	reviewed	Noelin (Neuronal olfactomedin-related ER localized protein) (Olfactomedin-1) (Pancortin)	Olfm1 Noe1 Noel Noel1	Mus musculus (Mouse)	485	AMPA glutamate receptor complex [GO:0032281]; axon [GO:0030424]; axonal growth cone [GO:0044295]; endoplasmic reticulum [GO:0005783]; extracellular space [GO:0005615]; extrinsic component of synaptic membrane [GO:0099243]; glutamatergic synapse [GO:0098978]; neuronal cell body [GO:0043025]; perikaryon [GO:0043204]; synaptic membrane [GO:0097060]
O89026	ROBO1_MOUSE	reviewed	Roundabout homolog 1	Robo1 Dutt1	Mus musculus (Mouse)	1612	axolemma [GO:0030673]; axon [GO:0030424]; cell surface [GO:0009986]; cytoplasm [GO:0005737]; endoplasmic reticulum-Golgi intermediate compartment membrane [GO:0033116]; integral component of membrane [GO:0016021]; neuronal cell body [GO:0043025]; plasma membrane [GO:0005886]
O89032	SPD2A_MOUSE	reviewed	SH3 and PX domain-containing protein 2A (Five SH3 domain-containing protein) (SH3 multiple domains protein 1) (Tyrosine kinase substrate with five SH3 domains)	Sh3pxd2a Fish Sh3md1 Tks5	Mus musculus (Mouse)	1124	cell junction [GO:0030054]; cell projection [GO:0042995]; cytoplasm [GO:0005737]; podosome [GO:0002102]
O89053	COR1A_MOUSE	reviewed	Coronin-1A (Coronin-like protein A) (Clipin-A) (Coronin-like protein p57) (Tryptophan aspartate-containing coat protein) (TACO)	Coro1a Coro1	Mus musculus (Mouse)	461	actin cytoskeleton [GO:0015629]; actin filament [GO:0005884]; axon [GO:0030424]; cell-cell junction [GO:0005911]; cell leading edge [GO:0031252]; cortical actin cytoskeleton [GO:0030864]; cytoplasm [GO:0005737]; cytosol [GO:0005829]; early endosome [GO:0005769]; glutamatergic synapse [GO:0098978]; immunological synapse [GO:0001772]; lamellipodium [GO:0030027]; phagocytic cup [GO:0001891]; phagocy…
O89084	PDE4A_MOUSE	reviewed	cAMP-specific 3',5'-cyclic phosphodiesterase 4A (EC 3.1.4.53)	Pde4a	Mus musculus (Mouse)	844	cytoplasm [GO:0005737]; cytosol [GO:0005829]; membrane [GO:0016020]; nucleoplasm [GO:0005654]; nucleus [GO:0005634]; perinuclear region of cytoplasm [GO:0048471]; plasma membrane [GO:0005886]; Schaffer collateral - CA1 synapse [GO:0098685]
O89086	RBM3_MOUSE	reviewed	RNA-binding protein 3 (RNA-binding motif protein 3)	Rbm3	Mus musculus (Mouse)	153	cytoplasm [GO:0005737]; dendrite [GO:0030425]; nucleoplasm [GO:0005654]; nucleus [GO:0005634]; spliceosomal complex [GO:0005681]
O89112	LANC1_MOUSE	reviewed	Glutathione S-transferase LANCL1 (EC 2.5.1.18) (40 kDa erythrocyte membrane protein) (p40) (LanC-like protein 1)	Lancl1 Gpr69a	Mus musculus (Mouse)	399	cytoplasm [GO:0005737]; plasma membrane [GO:0005886]
O89116	VTI1A_MOUSE	reviewed	Vesicle transport through interaction with t-SNAREs homolog 1A (Vesicle transport v-SNARE protein Vti1-like 2) (Vti1-rp2)	Vti1a Vti1 Vti1l2	Mus musculus (Mouse)	217	autophagosome [GO:0005776]; clathrin-coated vesicle [GO:0030136]; cytosol [GO:0005829]; endoplasmic reticulum membrane [GO:0005789]; endosome [GO:0005768]; ER to Golgi transport vesicle membrane [GO:0012507]; Golgi apparatus [GO:0005794]; Golgi membrane [GO:0000139]; integral component of membrane [GO:0016021]; intracellular membrane-bounded organelle [GO:0043231]; late endosome membrane [GO:0031…
P00405	COX2_MOUSE	reviewed	Cytochrome c oxidase subunit 2 (EC 7.1.1.9) (Cytochrome c oxidase polypeptide II)	Mtco2 COII COX2 mt-Co2	Mus musculus (Mouse)	227	integral component of membrane [GO:0016021]; mitochondrial inner membrane [GO:0005743]; mitochondrion [GO:0005739]; respiratory chain complex IV [GO:0045277]
P00493	HPRT_MOUSE	reviewed	Hypoxanthine-guanine phosphoribosyltransferase (HGPRT) (HGPRTase) (EC 2.4.2.8) (HPRT B)	Hprt1 Hprt	Mus musculus (Mouse)	218	cytoplasm [GO:0005737]; cytosol [GO:0005829]
P00520	ABL1_MOUSE	reviewed	Tyrosine-protein kinase ABL1 (EC 2.7.10.2) (Abelson murine leukemia viral oncogene homolog 1) (Abelson tyrosine-protein kinase 1) (Proto-oncogene c-Abl) (p150)	Abl1 Abl	Mus musculus (Mouse)	1123	actin cytoskeleton [GO:0015629]; cell leading edge [GO:0031252]; cytoplasm [GO:0005737]; cytosol [GO:0005829]; dendrite [GO:0030425]; endoplasmic reticulum [GO:0005783]; growth cone [GO:0030426]; mitochondrion [GO:0005739]; neuronal cell body [GO:0043025]; neuron projection [GO:0043005]; nuclear body [GO:0016604]; nucleolus [GO:0005730]; nucleoplasm [GO:0005654]; nucleus [GO:0005634]; perinuclear…
P00920	CAH2_MOUSE	reviewed	Carbonic anhydrase 2 (EC 4.2.1.1) (Carbonate dehydratase II) (Carbonic anhydrase II) (CA-II)	Ca2 Car2	Mus musculus (Mouse)	260	apical part of cell [GO:0045177]; axon [GO:0030424]; basolateral plasma membrane [GO:0016323]; cytoplasm [GO:0005737]; cytosol [GO:0005829]; extracellular space [GO:0005615]; microvillus [GO:0005902]; myelin sheath [GO:0043209]; plasma membrane [GO:0005886]
P01831	THY1_MOUSE	reviewed	Thy-1 membrane glycoprotein (Thy-1 antigen) (CD antigen CD90)	Thy1 Thy-1	Mus musculus (Mouse)	162	anchored component of external side of plasma membrane [GO:0031362]; anchored component of plasma membrane [GO:0046658]; apical plasma membrane [GO:0016324]; axolemma [GO:0030673]; cell surface [GO:0009986]; cytosol [GO:0005829]; dendrite [GO:0030425]; dendrite membrane [GO:0032590]; endoplasmic reticulum [GO:0005783]; external side of plasma membrane [GO:0009897]; growth cone [GO:0030426]; membr…
P01942	HBA_MOUSE	reviewed	Hemoglobin subunit alpha (Alpha-globin) (Hemoglobin alpha chain)	Hba Hba-a1	Mus musculus (Mouse)	142	cytosolic small ribosomal subunit [GO:0022627]; extracellular space [GO:0005615]; haptoglobin-hemoglobin complex [GO:0031838]; hemoglobin complex [GO:0005833]; myelin sheath [GO:0043209]
P02088	HBB1_MOUSE	reviewed	Hemoglobin subunit beta-1 (Beta-1-globin) (Hemoglobin beta-1 chain) (Hemoglobin beta-major chain)	Hbb-b1	Mus musculus (Mouse)	147	haptoglobin-hemoglobin complex [GO:0031838]; hemoglobin complex [GO:0005833]; myelin sheath [GO:0043209]
P03899	NU3M_MOUSE	reviewed	NADH-ubiquinone oxidoreductase chain 3 (EC 7.1.1.2) (NADH dehydrogenase subunit 3)	Mtnd3 mt-Nd3 Nd3	Mus musculus (Mouse)	115	mitochondrial inner membrane [GO:0005743]; mitochondrial respiratory chain complex I [GO:0005747]; mitochondrion [GO:0005739]
P03911	NU4M_MOUSE	reviewed	NADH-ubiquinone oxidoreductase chain 4 (EC 7.1.1.2) (NADH dehydrogenase subunit 4)	Mtnd4 mt-Nd4 Nd4	Mus musculus (Mouse)	459	mitochondrial inner membrane [GO:0005743]; mitochondrial respiratory chain complex I [GO:0005747]; mitochondrion [GO:0005739]
P03995	GFAP_MOUSE	reviewed	Glial fibrillary acidic protein (GFAP)	Gfap	Mus musculus (Mouse)	430	astrocyte end-foot [GO:0097450]; astrocyte projection [GO:0097449]; cell body [GO:0044297]; cell projection [GO:0042995]; cytoplasm [GO:0005737]; cytoplasmic side of lysosomal membrane [GO:0098574]; cytoskeleton [GO:0005856]; glial cell projection [GO:0097386]; intermediate filament [GO:0005882]; intermediate filament cytoskeleton [GO:0045111]; membrane [GO:0016020]; myelin sheath [GO:0043209]
P04104	K2C1_MOUSE	reviewed	Keratin, type II cytoskeletal 1 (67 kDa cytokeratin) (Cytokeratin-1) (CK-1) (Keratin-1) (K1) (Type-II keratin Kb1)	Krt1 Krt2-1	Mus musculus (Mouse)	637	collagen-containing extracellular matrix [GO:0062023]; cornified envelope [GO:0001533]; keratin filament [GO:0045095]; membrane [GO:0016020]
P04370	MBP_MOUSE	reviewed	Myelin basic protein (MBP) (Myelin A1 protein)	Mbp Shi	Mus musculus (Mouse)	250	cell periphery [GO:0071944]; cell projection [GO:0042995]; compact myelin [GO:0043218]; cytoplasm [GO:0005737]; internode region of axon [GO:0033269]; myelin sheath [GO:0043209]; neuronal cell body [GO:0043025]; nucleus [GO:0005634]; plasma membrane [GO:0005886]; protein-containing complex [GO:0032991]
P04627	ARAF_MOUSE	reviewed	Serine/threonine-protein kinase A-Raf (EC 2.7.11.1) (Proto-oncogene A-Raf)	Araf A-raf Araf1	Mus musculus (Mouse)	604	cytosol [GO:0005829]; mitochondrion [GO:0005739]
P04925	PRIO_MOUSE	reviewed	Major prion protein (PrP) (PrP27-30) (PrP33-35C) (CD antigen CD230)	Prnp Prn-p Prp	Mus musculus (Mouse)	254	anchored component of membrane [GO:0031225]; cell surface [GO:0009986]; cytoplasm [GO:0005737]; cytosol [GO:0005829]; dendrite [GO:0030425]; endoplasmic reticulum [GO:0005783]; Golgi apparatus [GO:0005794]; inclusion body [GO:0016234]; intracellular membrane-bounded organelle [GO:0043231]; membrane [GO:0016020]; membrane raft [GO:0045121]; mitochondrial outer membrane [GO:0005741]; nuclear membra…
P05063	ALDOC_MOUSE	reviewed	Fructose-bisphosphate aldolase C (EC 4.1.2.13) (Aldolase 3) (Brain-type aldolase) (Scrapie-responsive protein 2) (Zebrin II)	Aldoc Aldo3 Scrg2	Mus musculus (Mouse)	363	axon [GO:0030424]; cytoplasm [GO:0005737]; cytosol [GO:0005829]; mitochondrion [GO:0005739]; postsynaptic cytosol [GO:0099524]
P05064	ALDOA_MOUSE	reviewed	Fructose-bisphosphate aldolase A (EC 4.1.2.13) (Aldolase 1) (Muscle-type aldolase)	Aldoa Aldo1	Mus musculus (Mouse)	364	actin cytoskeleton [GO:0015629]; cytoplasm [GO:0005737]; cytosol [GO:0005829]; extracellular exosome [GO:0070062]; extracellular space [GO:0005615]; heterochromatin [GO:0000792]; M band [GO:0031430]; membrane [GO:0016020]; mitochondrion [GO:0005739]; myelin sheath [GO:0043209]; plasma membrane [GO:0005886]; protein-containing complex [GO:0032991]; sperm fibrous sheath [GO:0035686]; sperm head [GO…
P05132	KAPCA_MOUSE	reviewed	cAMP-dependent protein kinase catalytic subunit alpha (PKA C-alpha) (EC 2.7.11.11)	Prkaca Pkaca	Mus musculus (Mouse)	351	acrosomal vesicle [GO:0001669]; axoneme [GO:0005930]; cAMP-dependent protein kinase complex [GO:0005952]; centrosome [GO:0005813]; ciliary base [GO:0097546]; cytoplasm [GO:0005737]; cytosol [GO:0005829]; dendritic spine [GO:0043197]; Golgi apparatus [GO:0005794]; membrane [GO:0016020]; mitochondrion [GO:0005739]; neuromuscular junction [GO:0031594]; neuron projection [GO:0043005]; nuclear speck […
P05201	AATC_MOUSE	reviewed	Aspartate aminotransferase, cytoplasmic (cAspAT) (EC 2.6.1.1) (EC 2.6.1.3) (Cysteine aminotransferase, cytoplasmic) (Cysteine transaminase, cytoplasmic) (cCAT) (Glutamate oxaloacetate transaminase 1) (Transaminase A)	Got1	Mus musculus (Mouse)	413	axon terminus [GO:0043679]; cytoplasm [GO:0005737]; cytosol [GO:0005829]; lysosome [GO:0005764]; nucleoplasm [GO:0005654]
P05480	SRC_MOUSE	reviewed	Neuronal proto-oncogene tyrosine-protein kinase Src (EC 2.7.10.2) (Proto-oncogene c-Src) (pp60c-src) (p60-Src)	Src	Mus musculus (Mouse)	535	actin filament [GO:0005884]; caveola [GO:0005901]; cell junction [GO:0030054]; cytoplasm [GO:0005737]; cytoskeleton [GO:0005856]; cytosol [GO:0005829]; extrinsic component of cytoplasmic side of plasma membrane [GO:0031234]; focal adhesion [GO:0005925]; glutamatergic synapse [GO:0098978]; late endosome [GO:0005770]; lysosome [GO:0005764]; membrane [GO:0016020]; mitochondrial inner membrane [GO:00…
P05532	KIT_MOUSE	reviewed	Mast/stem cell growth factor receptor Kit (SCFR) (EC 2.7.10.1) (Proto-oncogene c-Kit) (Tyrosine-protein kinase Kit) (CD antigen CD117)	Kit Sl	Mus musculus (Mouse)	979	acrosomal vesicle [GO:0001669]; cell-cell junction [GO:0005911]; cell surface [GO:0009986]; cytoplasm [GO:0005737]; cytoplasmic side of plasma membrane [GO:0009898]; external side of plasma membrane [GO:0009897]; extracellular space [GO:0005615]; fibrillar center [GO:0001650]; integral component of plasma membrane [GO:0005887]; plasma membrane [GO:0005886]; receptor complex [GO:0043235]
P06151	LDHA_MOUSE	reviewed	L-lactate dehydrogenase A chain (LDH-A) (EC 1.1.1.27) (LDH muscle subunit) (LDH-M)	Ldha Ldh-1 Ldh1	Mus musculus (Mouse)	332	cytosol [GO:0005829]; mitochondrion [GO:0005739]; sperm fibrous sheath [GO:0035686]
P06537	GCR_MOUSE	reviewed	Glucocorticoid receptor (GR) (Nuclear receptor subfamily 3 group C member 1)	Nr3c1 Grl Grl1	Mus musculus (Mouse)	792	cytoplasm [GO:0005737]; cytosol [GO:0005829]; dendritic spine [GO:0043197]; glutamatergic synapse [GO:0098978]; membrane [GO:0016020]; microtubule organizing center [GO:0005815]; mitochondrion [GO:0005739]; neuron projection [GO:0043005]; nuclear speck [GO:0016607]; nucleoplasm [GO:0005654]; nucleus [GO:0005634]; postsynaptic density [GO:0014069]; postsynaptic density, intracellular component [GO…
P06745	G6PI_MOUSE	reviewed	Glucose-6-phosphate isomerase (GPI) (EC 5.3.1.9) (Autocrine motility factor) (AMF) (Neuroleukin) (NLK) (Phosphoglucose isomerase) (PGI) (Phosphohexose isomerase) (PHI)	Gpi Gpi1	Mus musculus (Mouse)	558	ciliary membrane [GO:0060170]; cytoplasm [GO:0005737]; cytosol [GO:0005829]; extracellular space [GO:0005615]; myelin sheath [GO:0043209]; neuron projection [GO:0043005]; nucleoplasm [GO:0005654]; plasma membrane [GO:0005886]
P06801	MAOX_MOUSE	reviewed	NADP-dependent malic enzyme (NADP-ME) (EC 1.1.1.40) (Malic enzyme 1)	Me1 Mod-1 Mod1	Mus musculus (Mouse)	572	cytosol [GO:0005829]; mitochondrion [GO:0005739]
P06837	NEUM_MOUSE	reviewed	Neuromodulin (Axonal membrane protein GAP-43) (Calmodulin-binding protein P-57) (Growth-associated protein 43)	Gap43 Basp2	Mus musculus (Mouse)	227	axon [GO:0030424]; cell periphery [GO:0071944]; cytoplasm [GO:0005737]; dendrite [GO:0030425]; filopodium membrane [GO:0031527]; GABA-ergic synapse [GO:0098982]; growth cone membrane [GO:0032584]; perikaryon [GO:0043204]; plasma membrane [GO:0005886]; postsynaptic density [GO:0014069]
P07356	ANXA2_MOUSE	reviewed	Annexin A2 (Annexin II) (Annexin-2) (Calpactin I heavy chain) (Calpactin-1 heavy chain) (Chromobindin-8) (Lipocortin II) (Placental anticoagulant protein IV) (PAP-IV) (Protein I) (p36)	Anxa2 Anx2 Cal1h	Mus musculus (Mouse)	339	AnxA2-p11 complex [GO:1990665]; basement membrane [GO:0005604]; basolateral plasma membrane [GO:0016323]; cell cortex [GO:0005938]; cell surface [GO:0009986]; collagen-containing extracellular matrix [GO:0062023]; cytoplasm [GO:0005737]; cytosol [GO:0005829]; early endosome [GO:0005769]; endosome [GO:0005768]; extracellular exosome [GO:0070062]; extracellular space [GO:0005615]; extrinsic compone…
P07724	ALBU_MOUSE	reviewed	Albumin	Alb Alb-1 Alb1	Mus musculus (Mouse)	608	basement membrane [GO:0005604]; cytoplasm [GO:0005737]; endoplasmic reticulum [GO:0005783]; extracellular exosome [GO:0070062]; extracellular region [GO:0005576]; extracellular space [GO:0005615]; Golgi apparatus [GO:0005794]; myelin sheath [GO:0043209]; protein-containing complex [GO:0032991]
P07901	HS90A_MOUSE	reviewed	Heat shock protein HSP 90-alpha (EC 3.6.4.10) (Heat shock 86 kDa) (HSP 86) (HSP86) (Tumor-specific transplantation 86 kDa antigen) (TSTA)	Hsp90aa1 Hsp86 Hsp86-1 Hspca	Mus musculus (Mouse)	733	apical plasma membrane [GO:0016324]; axonal growth cone [GO:0044295]; basolateral plasma membrane [GO:0016323]; brush border membrane [GO:0031526]; cell surface [GO:0009986]; collagen-containing extracellular matrix [GO:0062023]; cytoplasm [GO:0005737]; cytosol [GO:0005829]; dendritic growth cone [GO:0044294]; melanosome [GO:0042470]; mitochondrion [GO:0005739]; myelin sheath [GO:0043209]; neuron…
P08003	PDIA4_MOUSE	reviewed	Protein disulfide-isomerase A4 (EC 5.3.4.1) (Endoplasmic reticulum resident protein 72) (ER protein 72) (ERp-72) (ERp72)	Pdia4 Cai Erp72	Mus musculus (Mouse)	638	cell surface [GO:0009986]; endoplasmic reticulum [GO:0005783]; endoplasmic reticulum chaperone complex [GO:0034663]; endoplasmic reticulum lumen [GO:0005788]; extracellular space [GO:0005615]; melanosome [GO:0042470]; smooth endoplasmic reticulum [GO:0005790]
P08113	ENPL_MOUSE	reviewed	Endoplasmin (94 kDa glucose-regulated protein) (GRP-94) (Endoplasmic reticulum resident protein 99) (ERp99) (Heat shock protein 90 kDa beta member 1) (Polymorphic tumor rejection antigen 1) (Tumor rejection antigen gp96)	Hsp90b1 Grp94 Tra-1 Tra1	Mus musculus (Mouse)	802	cytosol [GO:0005829]; endoplasmic reticulum [GO:0005783]; endoplasmic reticulum chaperone complex [GO:0034663]; endoplasmic reticulum lumen [GO:0005788]; endoplasmic reticulum membrane [GO:0005789]; extracellular region [GO:0005576]; melanosome [GO:0042470]; midbody [GO:0030496]; perinuclear region of cytoplasm [GO:0048471]; plasma membrane [GO:0005886]; protein-containing complex [GO:0032991]; s…
P08228	SODC_MOUSE	reviewed	Superoxide dismutase [Cu-Zn] (EC 1.15.1.1)	Sod1	Mus musculus (Mouse)	154	axon cytoplasm [GO:1904115]; cytoplasm [GO:0005737]; cytoplasmic vesicle [GO:0031410]; cytosol [GO:0005829]; dendrite cytoplasm [GO:0032839]; dense core granule [GO:0031045]; extracellular region [GO:0005576]; extracellular space [GO:0005615]; lysosome [GO:0005764]; mitochondrial intermembrane space [GO:0005758]; mitochondrion [GO:0005739]; myelin sheath [GO:0043209]; neuronal cell body [GO:00430…
P08249	MDHM_MOUSE	reviewed	Malate dehydrogenase, mitochondrial (EC 1.1.1.37)	Mdh2 Mor1	Mus musculus (Mouse)	338	cytoplasm [GO:0005737]; membrane [GO:0016020]; mitochondrial inner membrane [GO:0005743]; mitochondrial matrix [GO:0005759]; mitochondrion [GO:0005739]; myelin sheath [GO:0043209]
P08414	KCC4_MOUSE	reviewed	Calcium/calmodulin-dependent protein kinase type IV (CaMK IV) (EC 2.7.11.17) (CaM kinase-GR)	Camk4	Mus musculus (Mouse)	469	cytoplasm [GO:0005737]; cytosol [GO:0005829]; fibrillar center [GO:0001650]; GABA-ergic synapse [GO:0098982]; glutamatergic synapse [GO:0098978]; nucleoplasm [GO:0005654]; nucleus [GO:0005634]; postsynapse [GO:0098794]
P08551	NFL_MOUSE	reviewed	Neurofilament light polypeptide (NF-L) (68 kDa neurofilament protein) (Neurofilament triplet L protein)	Nefl Nf68 Nfl	Mus musculus (Mouse)	543	axon [GO:0030424]; axon cytoplasm [GO:1904115]; cholinergic synapse [GO:0098981]; cytoplasm [GO:0005737]; growth cone [GO:0030426]; intermediate filament [GO:0005882]; myelin sheath [GO:0043209]; neurofilament [GO:0005883]; neuromuscular junction [GO:0031594]; neuron projection [GO:0043005]; postsynaptic intermediate filament cytoskeleton [GO:0099160]; presynaptic intermediate filament cytoskelet…
P08553	NFM_MOUSE	reviewed	Neurofilament medium polypeptide (NF-M) (160 kDa neurofilament protein) (Neurofilament 3) (Neurofilament triplet M protein)	Nefm Nef3 Nfm	Mus musculus (Mouse)	848	axon [GO:0030424]; cytoskeleton [GO:0005856]; intermediate filament [GO:0005882]; myelin sheath [GO:0043209]; neurofilament [GO:0005883]; neuromuscular junction [GO:0031594]; neuron projection [GO:0043005]; perikaryon [GO:0043204]; postsynaptic density [GO:0014069]; postsynaptic intermediate filament cytoskeleton [GO:0099160]; presynaptic intermediate filament cytoskeleton [GO:0099182]
P08556	RASN_MOUSE	reviewed	GTPase NRas (EC 3.6.5.2) (Transforming protein N-Ras)	Nras	Mus musculus (Mouse)	189	Golgi apparatus [GO:0005794]; Golgi membrane [GO:0000139]; membrane [GO:0016020]; plasma membrane [GO:0005886]
P08752	GNAI2_MOUSE	reviewed	Guanine nucleotide-binding protein G(i) subunit alpha-2 (Adenylate cyclase-inhibiting G alpha protein)	Gnai2 Gnai-2	Mus musculus (Mouse)	355	cell body [GO:0044297]; centrosome [GO:0005813]; cytoplasm [GO:0005737]; cytosol [GO:0005829]; dendrite [GO:0030425]; heterotrimeric G-protein complex [GO:0005834]; membrane [GO:0016020]; membrane raft [GO:0045121]; midbody [GO:0030496]; nucleoplasm [GO:0005654]; nucleus [GO:0005634]; plasma membrane [GO:0005886]; synapse [GO:0045202]
P09103	PDIA1_MOUSE	reviewed	Protein disulfide-isomerase (PDI) (EC 5.3.4.1) (Cellular thyroid hormone-binding protein) (Endoplasmic reticulum resident protein 59) (ER protein 59) (ERp59) (Prolyl 4-hydroxylase subunit beta) (p55)	P4hb Pdia1	Mus musculus (Mouse)	509	cytoskeleton [GO:0005856]; cytosol [GO:0005829]; endoplasmic reticulum [GO:0005783]; endoplasmic reticulum chaperone complex [GO:0034663]; endoplasmic reticulum-Golgi intermediate compartment [GO:0005793]; endoplasmic reticulum lumen [GO:0005788]; external side of plasma membrane [GO:0009897]; lamellipodium [GO:0030027]; melanosome [GO:0042470]; procollagen-proline 4-dioxygenase complex [GO:00162…
P09405	NUCL_MOUSE	reviewed	Nucleolin (Protein C23)	Ncl Nuc	Mus musculus (Mouse)	707	cell cortex [GO:0005938]; cell surface [GO:0009986]; chromosome [GO:0005694]; cytoplasm [GO:0005737]; cytoplasmic ribonucleoprotein granule [GO:0036464]; dense fibrillar component [GO:0001651]; fibrillar center [GO:0001650]; nucleolus [GO:0005730]; nucleoplasm [GO:0005654]; nucleus [GO:0005634]; ribonucleoprotein complex [GO:1990904]; spliceosomal complex [GO:0005681]
P09411	PGK1_MOUSE	reviewed	Phosphoglycerate kinase 1 (EC 2.7.2.3)	Pgk1 Pgk-1	Mus musculus (Mouse)	417	cytoplasm [GO:0005737]; cytosol [GO:0005829]; extracellular space [GO:0005615]; membrane raft [GO:0045121]
P09528	FRIH_MOUSE	reviewed	Ferritin heavy chain (Ferritin H subunit) (EC 1.16.3.1) [Cleaved into: Ferritin heavy chain, N-terminally processed]	Fth1 Fth	Mus musculus (Mouse)	182	autolysosome [GO:0044754]; cytoplasm [GO:0005737]; endocytic vesicle lumen [GO:0071682]; extracellular region [GO:0005576]; mitochondrion [GO:0005739]
P09671	SODM_MOUSE	reviewed	Superoxide dismutase [Mn], mitochondrial (EC 1.15.1.1)	Sod2 Sod-2	Mus musculus (Mouse)	222	cytoplasm [GO:0005737]; mitochondrial inner membrane [GO:0005743]; mitochondrial matrix [GO:0005759]; mitochondrial nucleoid [GO:0042645]; mitochondrion [GO:0005739]; myelin sheath [GO:0043209]
P0C027	NUD10_MOUSE	reviewed	Diphosphoinositol polyphosphate phosphohydrolase 3-alpha (DIPP-3-alpha) (DIPP3-alpha) (EC 3.6.1.52) (Diadenosine 5',5'''-P1,P6-hexaphosphate hydrolase 3-alpha) (Diadenosine hexaphosphate hydrolase (AMP-forming)) (EC 3.6.1.60) (Nucleoside diphosphate-linked moiety X motif 10) (Nudix motif 10)	Nudt10 Dipp3a	Mus musculus (Mouse)	164	cytoplasm [GO:0005737]; cytosol [GO:0005829]; nucleus [GO:0005634]
P0C0A3	CHMP6_MOUSE	reviewed	Charged multivesicular body protein 6 (Chromatin-modifying protein 6)	Chmp6	Mus musculus (Mouse)	200	endosome membrane [GO:0010008]; ESCRT III complex [GO:0000815]; late endosome membrane [GO:0031902]; multivesicular body [GO:0005771]
P0C7L0	WIPF3_MOUSE	reviewed	WAS/WASL-interacting protein family member 3 (Corticosteroids and regional expression protein 16 homolog)	Wipf3 Cr16	Mus musculus (Mouse)	485	actin filament [GO:0005884]; cytoplasm [GO:0005737]
P0DP27	CALM2_MOUSE	reviewed	Calmodulin-2	Calm2 Cam2 CamC	Mus musculus (Mouse)	149	calcium channel complex [GO:0034704]; catalytic complex [GO:1902494]; centrosome [GO:0005813]; cytoplasm [GO:0005737]; growth cone [GO:0030426]; membrane [GO:0016020]; mitochondrial membrane [GO:0031966]; myelin sheath [GO:0043209]; neuron projection [GO:0043005]; nucleus [GO:0005634]; plasma membrane [GO:0005886]; sarcomere [GO:0030017]; spindle microtubule [GO:0005876]; spindle pole [GO:0000922…
P10126	EF1A1_MOUSE	reviewed	Elongation factor 1-alpha 1 (EF-1-alpha-1) (Elongation factor Tu) (EF-Tu) (Eukaryotic elongation factor 1 A-1) (eEF1A-1)	Eef1a1 Eef1a	Mus musculus (Mouse)	462	cortical actin cytoskeleton [GO:0030864]; cytoplasm [GO:0005737]; cytosol [GO:0005829]; myelin sheath [GO:0043209]; nucleolus [GO:0005730]; nucleus [GO:0005634]; plasma membrane [GO:0005886]; ruffle membrane [GO:0032587]
P10630	IF4A2_MOUSE	reviewed	Eukaryotic initiation factor 4A-II (eIF-4A-II) (eIF4A-II) (EC 3.6.4.13) (ATP-dependent RNA helicase eIF4A-2)	Eif4a2 Ddx2b	Mus musculus (Mouse)	407	perinuclear region of cytoplasm [GO:0048471]
P10637	TAU_MOUSE	reviewed	Microtubule-associated protein tau (Neurofibrillary tangle protein) (Paired helical filament-tau) (PHF-tau)	Mapt Mtapt Tau	Mus musculus (Mouse)	733	axolemma [GO:0030673]; axon [GO:0030424]; axonal growth cone [GO:0044295]; axoneme [GO:0005930]; cell body [GO:0044297]; cytoplasm [GO:0005737]; cytoplasmic ribonucleoprotein granule [GO:0036464]; cytoplasmic side of plasma membrane [GO:0009898]; cytosol [GO:0005829]; dendrite [GO:0030425]; extracellular region [GO:0005576]; glial cell projection [GO:0097386]; growth cone [GO:0030426]; main axon …
P10639	THIO_MOUSE	reviewed	Thioredoxin (Trx) (ATL-derived factor) (ADF)	Txn Txn1	Mus musculus (Mouse)	105	axon [GO:0030424]; cytoplasm [GO:0005737]; cytosol [GO:0005829]; dendrite [GO:0030425]; extracellular region [GO:0005576]; mitochondrion [GO:0005739]; neuronal cell body [GO:0043025]; nucleoplasm [GO:0005654]; nucleus [GO:0005634]
P10649	GSTM1_MOUSE	reviewed	Glutathione S-transferase Mu 1 (EC 2.5.1.18) (GST 1-1) (GST class-mu 1) (Glutathione S-transferase GT8.7) (pmGT10)	Gstm1	Mus musculus (Mouse)	218	cytosol [GO:0005829]; extracellular region [GO:0005576]; intercellular bridge [GO:0045171]; myelin sheath [GO:0043209]; protein-containing complex [GO:0032991]
P10711	TCEA1_MOUSE	reviewed	Transcription elongation factor A protein 1 (Transcription elongation factor S-II protein 1) (Transcription elongation factor TFIIS.o)	Tcea1 Tceat	Mus musculus (Mouse)	301	nucleolus [GO:0005730]; nucleoplasm [GO:0005654]; transcription factor TFIID complex [GO:0005669]
P10852	4F2_MOUSE	reviewed	4F2 cell-surface antigen heavy chain (4F2hc) (Solute carrier family 3 member 2) (CD antigen CD98)	Slc3a2 Mdu1	Mus musculus (Mouse)	526	amino acid transport complex [GO:1990184]; apical plasma membrane [GO:0016324]; apical pole of neuron [GO:0044225]; basal plasma membrane [GO:0009925]; basolateral plasma membrane [GO:0016323]; cell surface [GO:0009986]; integral component of membrane [GO:0016021]; lysosomal membrane [GO:0005765]; melanosome [GO:0042470]; neuronal cell body [GO:0043025]; nucleoplasm [GO:0005654]; plasma membrane …
P10922	H10_MOUSE	reviewed	Histone H1.0 (Histone H1') (Histone H1(0)) (MyD196) [Cleaved into: Histone H1.0, N-terminally processed]	H1-0 H1f0 H1fv	Mus musculus (Mouse)	194	actin cytoskeleton [GO:0015629]; chromatin [GO:0000785]; euchromatin [GO:0000791]; Golgi apparatus [GO:0005794]; nuclear body [GO:0016604]; nucleoplasm [GO:0005654]; nucleosome [GO:0000786]; nucleus [GO:0005634]; transcription repressor complex [GO:0017053]
P11352	GPX1_MOUSE	reviewed	Glutathione peroxidase 1 (GPx-1) (GSHPx-1) (EC 1.11.1.9) (Cellular glutathione peroxidase) (Selenium-dependent glutathione peroxidase 1)	Gpx1	Mus musculus (Mouse)	201	cytoplasm [GO:0005737]; cytosol [GO:0005829]; Lewy body [GO:0097413]; mitochondrion [GO:0005739]; nucleus [GO:0005634]
P11438	LAMP1_MOUSE	reviewed	Lysosome-associated membrane glycoprotein 1 (LAMP-1) (Lysosome-associated membrane protein 1) (120 kDa lysosomal membrane glycoprotein) (CD107 antigen-like family member A) (LGP-120) (Lysosomal membrane glycoprotein A) (LGP-A) (P2B) (CD antigen CD107a)	Lamp1 Lamp-1	Mus musculus (Mouse)	406	alveolar lamellar body [GO:0097208]; autolysosome [GO:0044754]; autophagosome membrane [GO:0000421]; cell surface [GO:0009986]; cytolytic granule [GO:0044194]; cytolytic granule membrane [GO:0101004]; cytoplasm [GO:0005737]; cytoplasmic vesicle [GO:0031410]; cytosol [GO:0005829]; dendrite [GO:0030425]; endosome [GO:0005768]; endosome membrane [GO:0010008]; external side of plasma membrane [GO:000…
P11499	HS90B_MOUSE	reviewed	Heat shock protein HSP 90-beta (Heat shock 84 kDa) (HSP 84) (HSP84) (Tumor-specific transplantation 84 kDa antigen) (TSTA)	Hsp90ab1 Hsp84 Hsp84-1 Hspcb	Mus musculus (Mouse)	724	apical plasma membrane [GO:0016324]; aryl hydrocarbon receptor complex [GO:0034751]; axonal growth cone [GO:0044295]; basolateral plasma membrane [GO:0016323]; brush border membrane [GO:0031526]; cell surface [GO:0009986]; COP9 signalosome [GO:0008180]; cytoplasm [GO:0005737]; cytosol [GO:0005829]; dendritic growth cone [GO:0044294]; dynein axonemal particle [GO:0120293]; extracellular region [GO…
P11798	KCC2A_MOUSE	reviewed	Calcium/calmodulin-dependent protein kinase type II subunit alpha (CaM kinase II subunit alpha) (CaMK-II subunit alpha) (EC 2.7.11.17)	Camk2a	Mus musculus (Mouse)	478	axon [GO:0030424]; calcium- and calmodulin-dependent protein kinase complex [GO:0005954]; cytoplasm [GO:0005737]; cytosol [GO:0005829]; dendrite [GO:0030425]; dendrite cytoplasm [GO:0032839]; dendritic spine [GO:0043197]; glutamatergic postsynaptic density [GO:0099573]; glutamatergic synapse [GO:0098978]; membrane [GO:0016020]; mitochondrion [GO:0005739]; neuronal cell body [GO:0043025]; neuron p…
P11881	ITPR1_MOUSE	reviewed	Inositol 1,4,5-trisphosphate receptor type 1 (IP3 receptor isoform 1) (IP3R 1) (InsP3R1) (Inositol 1,4,5-trisphosphate-binding protein P400) (Protein PCD-6) (Purkinje cell protein 1) (Type 1 inositol 1,4,5-trisphosphate receptor) (Type 1 InsP3 receptor)	Itpr1 Insp3r Pcd6 Pcp1	Mus musculus (Mouse)	2749	calcineurin complex [GO:0005955]; cytoplasm [GO:0005737]; cytoplasmic vesicle membrane [GO:0030659]; dendrite [GO:0030425]; endoplasmic reticulum [GO:0005783]; endoplasmic reticulum membrane [GO:0005789]; GABA-ergic synapse [GO:0098982]; integral component of endoplasmic reticulum membrane [GO:0030176]; intracellular membrane-bounded organelle [GO:0043231]; membrane raft [GO:0045121]; neuronal ce…
P11983	TCPA_MOUSE	reviewed	T-complex protein 1 subunit alpha (TCP-1-alpha) (CCT-alpha) (Tailless complex polypeptide 1A) (TCP-1-A) (Tailless complex polypeptide 1B) (TCP-1-B)	Tcp1 Cct1 Ccta	Mus musculus (Mouse)	556	acrosomal vesicle [GO:0001669]; cell body [GO:0044297]; centrosome [GO:0005813]; chaperonin-containing T-complex [GO:0005832]; Golgi apparatus [GO:0005794]; heterochromatin [GO:0000792]; microtubule [GO:0005874]; microtubule organizing center [GO:0005815]; myelin sheath [GO:0043209]; pericentriolar material [GO:0000242]; zona pellucida receptor complex [GO:0002199]
P12023	A4_MOUSE	reviewed	Amyloid-beta precursor protein (ABPP) (APP) (Alzheimer disease amyloid A4 protein homolog) (Alzheimer disease amyloid protein) (Amyloid precursor protein) (Amyloid-beta (A4) precursor protein) (Amyloid-beta A4 protein) (Amyloidogenic glycoprotein) (AG) [Cleaved into: N-APP; Soluble APP-alpha (S-APP-alpha); Soluble APP-beta (S-APP-beta); C99 (APP-C99) (Beta-secretase C-terminal fragment) (Beta-CTF…	App A4 AD1	Mus musculus (Mouse)	770	amyloid-beta complex [GO:0106003]; apical part of cell [GO:0045177]; astrocyte projection [GO:0097449]; axon [GO:0030424]; cell-cell junction [GO:0005911]; cell surface [GO:0009986]; ciliary rootlet [GO:0035253]; clathrin-coated pit [GO:0005905]; COPII-coated ER to Golgi transport vesicle [GO:0030134]; cytoplasm [GO:0005737]; cytoplasmic vesicle [GO:0031410]; dendritic shaft [GO:0043198]; dendrit…
P12367	KAP2_MOUSE	reviewed	cAMP-dependent protein kinase type II-alpha regulatory subunit	Prkar2a	Mus musculus (Mouse)	401	cAMP-dependent protein kinase complex [GO:0005952]; centrosome [GO:0005813]; cytoplasm [GO:0005737]; cytosol [GO:0005829]; glutamatergic synapse [GO:0098978]; nucleotide-activated protein kinase complex [GO:0031588]; perinuclear region of cytoplasm [GO:0048471]; plasma membrane [GO:0005886]; plasma membrane raft [GO:0044853]; protein-containing complex [GO:0032991]; synapse [GO:0045202]; T-tubule…
P12382	PFKAL_MOUSE	reviewed	ATP-dependent 6-phosphofructokinase, liver type (ATP-PFK) (PFK-L) (EC 2.7.1.11) (6-phosphofructokinase type B) (Phosphofructo-1-kinase isozyme B) (PFK-B) (Phosphohexokinase)	Pfkl Pfk-l Pfkb	Mus musculus (Mouse)	780	6-phosphofructokinase complex [GO:0005945]; cytosol [GO:0005829]; membrane [GO:0016020]
P12658	CALB1_MOUSE	reviewed	Calbindin (Calbindin D28) (D-28K) (PCD-29) (Spot 35 protein) (Vitamin D-dependent calcium-binding protein, avian-type)	Calb1	Mus musculus (Mouse)	261	axon [GO:0030424]; calyx of Held [GO:0044305]; cell body [GO:0044297]; cuticular plate [GO:0032437]; cytoplasm [GO:0005737]; cytosol [GO:0005829]; dendrite [GO:0030425]; dendritic spine [GO:0043197]; GABA-ergic synapse [GO:0098982]; glutamatergic synapse [GO:0098978]; hippocampal mossy fiber to CA3 synapse [GO:0098686]; neuronal cell body [GO:0043025]; neuron projection [GO:0043005]; nucleus [GO:…
P12815	PDCD6_MOUSE	reviewed	Programmed cell death protein 6 (ALG-257) (Apoptosis-linked gene 2 protein) (ALG-2) (PMP41)	Pdcd6 Alg2	Mus musculus (Mouse)	191	COPII vesicle coat [GO:0030127]; Cul3-RING ubiquitin ligase complex [GO:0031463]; cytoplasm [GO:0005737]; cytoplasmic vesicle [GO:0031410]; cytosol [GO:0005829]; endoplasmic reticulum [GO:0005783]; endoplasmic reticulum exit site [GO:0070971]; endoplasmic reticulum membrane [GO:0005789]; endosome [GO:0005768]; nucleoplasm [GO:0005654]; nucleus [GO:0005634]
P12849	KAP1_MOUSE	reviewed	cAMP-dependent protein kinase type I-beta regulatory subunit	Prkar1b	Mus musculus (Mouse)	381	cAMP-dependent protein kinase complex [GO:0005952]; cytoplasm [GO:0005737]; glutamatergic synapse [GO:0098978]; hippocampal mossy fiber to CA3 synapse [GO:0098686]; multivesicular body [GO:0005771]; plasma membrane [GO:0005886]; Schaffer collateral - CA1 synapse [GO:0098685]; synapse [GO:0045202]
P12960	CNTN1_MOUSE	reviewed	Contactin-1 (Neural cell surface protein F3)	Cntn1	Mus musculus (Mouse)	1020	anchored component of postsynaptic membrane [GO:0099025]; anchored component of presynaptic membrane [GO:0099026]; membrane raft [GO:0045121]; myelin sheath [GO:0043209]; plasma membrane [GO:0005886]
P12970	RL7A_MOUSE	reviewed	60S ribosomal protein L7a (Surfeit locus protein 3)	Rpl7a Surf-3 Surf3	Mus musculus (Mouse)	266	cytosol [GO:0005829]; cytosolic large ribosomal subunit [GO:0022625]; cytosolic ribosome [GO:0022626]; membrane [GO:0016020]; nucleolus [GO:0005730]; polysomal ribosome [GO:0042788]; ribosome [GO:0005840]; synapse [GO:0045202]
P13020	GELS_MOUSE	reviewed	Gelsolin (Actin-depolymerizing factor) (ADF) (Brevin)	Gsn Gsb	Mus musculus (Mouse)	780	actin cap [GO:0030478]; actin cytoskeleton [GO:0015629]; cortical actin cytoskeleton [GO:0030864]; cytoplasm [GO:0005737]; cytosol [GO:0005829]; extracellular region [GO:0005576]; extracellular space [GO:0005615]; lamellipodium [GO:0030027]; myelin sheath [GO:0043209]; perinuclear region of cytoplasm [GO:0048471]; phagocytic vesicle [GO:0045335]; plasma membrane [GO:0005886]; podosome [GO:0002102…
P13595	NCAM1_MOUSE	reviewed	Neural cell adhesion molecule 1 (N-CAM-1) (NCAM-1) (CD antigen CD56)	Ncam1 Ncam	Mus musculus (Mouse)	1115	anchored component of membrane [GO:0031225]; axon [GO:0030424]; cell-cell junction [GO:0005911]; cell surface [GO:0009986]; cytosol [GO:0005829]; external side of plasma membrane [GO:0009897]; glutamatergic synapse [GO:0098978]; growth cone [GO:0030426]; integral component of postsynaptic membrane [GO:0099055]; integral component of presynaptic membrane [GO:0099056]; myelin sheath [GO:0043209]; n…
P14094	AT1B1_MOUSE	reviewed	Sodium/potassium-transporting ATPase subunit beta-1 (Sodium/potassium-dependent ATPase subunit beta-1)	Atp1b1 Atp4b	Mus musculus (Mouse)	304	apical plasma membrane [GO:0016324]; basolateral plasma membrane [GO:0016323]; caveola [GO:0005901]; intercalated disc [GO:0014704]; lateral plasma membrane [GO:0016328]; membrane [GO:0016020]; myelin sheath [GO:0043209]; organelle membrane [GO:0031090]; plasma membrane [GO:0005886]; sarcolemma [GO:0042383]; sodium:potassium-exchanging ATPase complex [GO:0005890]; sperm flagellum [GO:0036126]; T-…
P14115	RL27A_MOUSE	reviewed	60S ribosomal protein L27a (L29)	Rpl27a	Mus musculus (Mouse)	148	cytosol [GO:0005829]; cytosolic large ribosomal subunit [GO:0022625]; cytosolic ribosome [GO:0022626]; endoplasmic reticulum [GO:0005783]
P14131	RS16_MOUSE	reviewed	40S ribosomal protein S16	Rps16	Mus musculus (Mouse)	146	cytosol [GO:0005829]; cytosolic ribosome [GO:0022626]; cytosolic small ribosomal subunit [GO:0022627]; small ribosomal subunit [GO:0015935]
P14148	RL7_MOUSE	reviewed	60S ribosomal protein L7	Rpl7	Mus musculus (Mouse)	270	A band [GO:0031672]; cytosol [GO:0005829]; cytosolic large ribosomal subunit [GO:0022625]; cytosolic ribosome [GO:0022626]; polysome [GO:0005844]; postsynaptic density [GO:0014069]; ribonucleoprotein complex [GO:1990904]; ribosome [GO:0005840]; synapse [GO:0045202]
P14152	MDHC_MOUSE	reviewed	Malate dehydrogenase, cytoplasmic (EC 1.1.1.37) (Cytosolic malate dehydrogenase)	Mdh1 Mor2	Mus musculus (Mouse)	334	centrosome [GO:0005813]; cytosol [GO:0005829]; mitochondrion [GO:0005739]; myelin sheath [GO:0043209]
P14206	RSSA_MOUSE	reviewed	40S ribosomal protein SA (37 kDa laminin receptor precursor) (37LRP) (37 kDa oncofetal antigen) (37/67 kDa laminin receptor) (LRP/LR) (67 kDa laminin receptor) (67LR) (Laminin receptor 1) (LamR) (Laminin-binding protein precursor p40) (LBP/p40) (OFA/iLRP)	Rpsa Lamr1 P40-8	Mus musculus (Mouse)	295	basement membrane [GO:0005604]; collagen-containing extracellular matrix [GO:0062023]; cytoplasm [GO:0005737]; cytosol [GO:0005829]; cytosolic ribosome [GO:0022626]; cytosolic small ribosomal subunit [GO:0022627]; glutamatergic synapse [GO:0098978]; membrane [GO:0016020]; neuronal cell body [GO:0043025]; nucleus [GO:0005634]; plasma membrane [GO:0005886]; small ribosomal subunit [GO:0015935]; syn…
P14211	CALR_MOUSE	reviewed	Calreticulin (CRP55) (Calregulin) (Endoplasmic reticulum resident protein 60) (ERp60) (HACBP)	Calr	Mus musculus (Mouse)	416	acrosomal vesicle [GO:0001669]; cell surface [GO:0009986]; collagen-containing extracellular matrix [GO:0062023]; cortical granule [GO:0060473]; cytoplasm [GO:0005737]; cytosol [GO:0005829]; endoplasmic reticulum [GO:0005783]; endoplasmic reticulum lumen [GO:0005788]; endoplasmic reticulum membrane [GO:0005789]; endoplasmic reticulum quality control compartment [GO:0044322]; external side of plas…
P14231	AT1B2_MOUSE	reviewed	Sodium/potassium-transporting ATPase subunit beta-2 (Adhesion molecule in glia) (AMOG) (Sodium/potassium-dependent ATPase subunit beta-2)	Atp1b2	Mus musculus (Mouse)	290	apical plasma membrane [GO:0016324]; astrocyte end-foot [GO:0097450]; astrocyte projection [GO:0097449]; cell body membrane [GO:0044298]; cell periphery [GO:0071944]; cell projection membrane [GO:0031253]; cytoplasm [GO:0005737]; external side of plasma membrane [GO:0009897]; lateral plasma membrane [GO:0016328]; membrane [GO:0016020]; neuron to neuron synapse [GO:0098984]; photoreceptor inner se…
P14685	PSMD3_MOUSE	reviewed	26S proteasome non-ATPase regulatory subunit 3 (26S proteasome regulatory subunit RPN3) (26S proteasome regulatory subunit S3) (Proteasome subunit p58) (Transplantation antigen P91A) (Tum-P91A antigen)	Psmd3 P91a Tstap91a	Mus musculus (Mouse)	530	proteasome accessory complex [GO:0022624]; proteasome complex [GO:0000502]; proteasome regulatory particle [GO:0005838]; proteasome regulatory particle, lid subcomplex [GO:0008541]
P14733	LMNB1_MOUSE	reviewed	Lamin-B1	Lmnb1	Mus musculus (Mouse)	588	cytoplasm [GO:0005737]; lamin filament [GO:0005638]; nuclear envelope [GO:0005635]; nuclear inner membrane [GO:0005637]; nuclear lamina [GO:0005652]; nuclear matrix [GO:0016363]; nuclear membrane [GO:0031965]; nucleoplasm [GO:0005654]; nucleus [GO:0005634]
P14824	ANXA6_MOUSE	reviewed	Annexin A6 (67 kDa calelectrin) (Annexin VI) (Annexin-6) (Calphobindin-II) (CPB-II) (Chromobindin-20) (Lipocortin VI) (Protein III) (p68) (p70)	Anxa6 Anx6	Mus musculus (Mouse)	673	apical plasma membrane [GO:0016324]; collagen-containing extracellular matrix [GO:0062023]; cytoplasm [GO:0005737]; cytosol [GO:0005829]; focal adhesion [GO:0005925]; intercalated disc [GO:0014704]; late endosome membrane [GO:0031902]; lysosomal membrane [GO:0005765]; melanosome [GO:0042470]; membrane [GO:0016020]; mitochondrion [GO:0005739]; nucleus [GO:0005634]; perinuclear region of cytoplasm …
P14869	RLA0_MOUSE	reviewed	60S acidic ribosomal protein P0 (60S ribosomal protein L10E)	Rplp0 Arbp	Mus musculus (Mouse)	317	cytoplasm [GO:0005737]; cytoplasmic ribonucleoprotein granule [GO:0036464]; cytosol [GO:0005829]; cytosolic large ribosomal subunit [GO:0022625]; cytosolic ribosome [GO:0022626]; dendrite [GO:0030425]; endoplasmic reticulum [GO:0005783]; membrane [GO:0016020]; nucleus [GO:0005634]; postsynapse [GO:0098794]; postsynaptic density [GO:0014069]; ribonucleoprotein complex [GO:1990904]; synapse [GO:004…
P14873	MAP1B_MOUSE	reviewed	Microtubule-associated protein 1B (MAP-1B) (MAP1(X)) (MAP1.2) [Cleaved into: MAP1B heavy chain; MAP1 light chain LC1]	Map1b Mtap1b Mtap5	Mus musculus (Mouse)	2464	apical dendrite [GO:0097440]; axon [GO:0030424]; basal dendrite [GO:0097441]; cytoskeleton [GO:0005856]; cytosol [GO:0005829]; dendrite [GO:0030425]; dendritic spine [GO:0043197]; growth cone [GO:0030426]; hippocampal mossy fiber [GO:0097457]; microtubule [GO:0005874]; microtubule associated complex [GO:0005875]; neuronal cell body [GO:0043025]; perikaryon [GO:0043204]; perinuclear region of cyto…
P15105	GLNA_MOUSE	reviewed	Glutamine synthetase (GS) (EC 6.3.1.2) (Glutamate--ammonia ligase) (Palmitoyltransferase GLUL) (EC 2.3.1.225)	Glul Glns	Mus musculus (Mouse)	373	axon terminus [GO:0043679]; cell body [GO:0044297]; cell projection [GO:0042995]; cytoplasm [GO:0005737]; cytosol [GO:0005829]; glial cell projection [GO:0097386]; intracellular membrane-bounded organelle [GO:0043231]; mitochondrion [GO:0005739]; myelin sheath [GO:0043209]; neuron projection [GO:0043005]; perikaryon [GO:0043204]; plasma membrane [GO:0005886]; protein-containing complex [GO:003299…
P15116	CADH2_MOUSE	reviewed	Cadherin-2 (Neural cadherin) (N-cadherin) (CD antigen CD325)	Cdh2	Mus musculus (Mouse)	906	adherens junction [GO:0005912]; apical part of cell [GO:0045177]; apical plasma membrane [GO:0016324]; apicolateral plasma membrane [GO:0016327]; basolateral plasma membrane [GO:0016323]; catenin complex [GO:0016342]; cell-cell junction [GO:0005911]; cell junction [GO:0030054]; cell surface [GO:0009986]; cortical actin cytoskeleton [GO:0030864]; cytoplasm [GO:0005737]; fascia adherens [GO:0005916…
P15209	NTRK2_MOUSE	reviewed	BDNF/NT-3 growth factors receptor (EC 2.7.10.1) (GP145-TrkB/GP95-TrkB) (Trk-B) (Neurotrophic tyrosine kinase receptor type 2) (TrkB tyrosine kinase)	Ntrk2 Trkb	Mus musculus (Mouse)	821	axon [GO:0030424]; axon terminus [GO:0043679]; cell surface [GO:0009986]; cytoplasm [GO:0005737]; cytosol [GO:0005829]; dendrite [GO:0030425]; dendritic spine [GO:0043197]; early endosome [GO:0005769]; early endosome membrane [GO:0031901]; endosome [GO:0005768]; excitatory synapse [GO:0060076]; glutamatergic synapse [GO:0098978]; growth cone [GO:0030426]; integral component of plasma membrane [GO…
P15307	REL_MOUSE	reviewed	Proto-oncogene c-Rel	Rel	Mus musculus (Mouse)	587	cytoplasm [GO:0005737]; nucleus [GO:0005634]; transcription regulator complex [GO:0005667]
P15331	PERI_MOUSE	reviewed	Peripherin	Prph Prph1	Mus musculus (Mouse)	475	axon [GO:0030424]; C-fiber [GO:0044299]; intermediate filament [GO:0005882]; neurofilament [GO:0005883]; neuronal cell body [GO:0043025]; neuron projection [GO:0043005]; perikaryon [GO:0043204]; photoreceptor outer segment [GO:0001750]; photoreceptor outer segment membrane [GO:0042622]; terminal bouton [GO:0043195]; type III intermediate filament [GO:0045098]
P15508	SPTB1_MOUSE	reviewed	Spectrin beta chain, erythrocytic (Beta-I spectrin)	Sptb Spnb-1 Spnb1 Sptb1	Mus musculus (Mouse)	2128	cell surface [GO:0009986]; cortical cytoskeleton [GO:0030863]; cytosol [GO:0005829]; membrane [GO:0016020]; plasma membrane [GO:0005886]; protein-containing complex [GO:0032991]; spectrin [GO:0008091]; spectrin-associated cytoskeleton [GO:0014731]
P15532	NDKA_MOUSE	reviewed	Nucleoside diphosphate kinase A (NDK A) (NDP kinase A) (EC 2.7.4.6) (Metastasis inhibition factor NM23) (NDPK-A) (Tumor metastatic process-associated protein) (nm23-M1)	Nme1 Nm23	Mus musculus (Mouse)	152	centrosome [GO:0005813]; cytosol [GO:0005829]; intermediate filament [GO:0005882]; membrane [GO:0016020]; mitochondrial outer membrane [GO:0005741]; mitochondrion [GO:0005739]; myelin sheath [GO:0043209]; nucleus [GO:0005634]; perinuclear region of cytoplasm [GO:0048471]; ruffle membrane [GO:0032587]
P15864	H12_MOUSE	reviewed	Histone H1.2 (H1 VAR.1) (H1c)	H1-2 H1f2 Hist1h1c	Mus musculus (Mouse)	212	euchromatin [GO:0000791]; nucleosome [GO:0000786]; nucleus [GO:0005634]; transcriptionally active chromatin [GO:0035327]
P16054	KPCE_MOUSE	reviewed	Protein kinase C epsilon type (EC 2.7.11.13) (nPKC-epsilon)	Prkce Pkce Pkcea	Mus musculus (Mouse)	737	cell periphery [GO:0071944]; cytoplasm [GO:0005737]; cytosol [GO:0005829]; endoplasmic reticulum [GO:0005783]; glutamatergic synapse [GO:0098978]; Golgi membrane [GO:0000139]; intermediate filament cytoskeleton [GO:0045111]; intracellular membrane-bounded organelle [GO:0043231]; membrane [GO:0016020]; mitochondrion [GO:0005739]; neuromuscular junction [GO:0031594]; nucleus [GO:0005634]; perinucle…
P16125	LDHB_MOUSE	reviewed	L-lactate dehydrogenase B chain (LDH-B) (EC 1.1.1.27) (LDH heart subunit) (LDH-H)	Ldhb Ldh-2 Ldh2	Mus musculus (Mouse)	334	cytosol [GO:0005829]; membrane raft [GO:0045121]; mitochondrial inner membrane [GO:0005743]; mitochondrion [GO:0005739]; myelin sheath [GO:0043209]
P16283	B3A3_MOUSE	reviewed	Anion exchange protein 3 (AE 3) (Anion exchanger 3) (Neuronal band 3-like protein) (Solute carrier family 4 member 3)	Slc4a3 Ae3	Mus musculus (Mouse)	1227	external side of plasma membrane [GO:0009897]; integral component of membrane [GO:0016021]; plasma membrane [GO:0005886]
P16330	CN37_MOUSE	reviewed	2',3'-cyclic-nucleotide 3'-phosphodiesterase (CNP) (CNPase) (EC 3.1.4.37)	Cnp Cnp1	Mus musculus (Mouse)	420	cell projection [GO:0042995]; cytoplasm [GO:0005737]; extracellular space [GO:0005615]; melanosome [GO:0042470]; membrane [GO:0016020]; microtubule [GO:0005874]; microvillus [GO:0005902]; mitochondrial inner membrane [GO:0005743]; mitochondrial outer membrane [GO:0005741]; myelin sheath [GO:0043209]; myelin sheath abaxonal region [GO:0035748]; myelin sheath adaxonal region [GO:0035749]; perinucle…
P16460	ASSY_MOUSE	reviewed	Argininosuccinate synthase (EC 6.3.4.5) (Citrulline--aspartate ligase)	Ass1 Ass	Mus musculus (Mouse)	412	cell body fiber [GO:0070852]; cytoplasm [GO:0005737]; cytosol [GO:0005829]; endoplasmic reticulum [GO:0005783]; lysosome [GO:0005764]; mitochondrial outer membrane [GO:0005741]; mitochondrion [GO:0005739]; myelin sheath [GO:0043209]; neuronal cell body [GO:0043025]; neuron projection [GO:0043005]; nucleus [GO:0005634]; perikaryon [GO:0043204]
P16546	SPTN1_MOUSE	reviewed	Spectrin alpha chain, non-erythrocytic 1 (Alpha-II spectrin) (Fodrin alpha chain)	Sptan1 Spna2 Spta2	Mus musculus (Mouse)	2472	cortical cytoskeleton [GO:0030863]; cuticular plate [GO:0032437]; cytosol [GO:0005829]; fascia adherens [GO:0005916]; intracellular membrane-bounded organelle [GO:0043231]; lateral plasma membrane [GO:0016328]; membrane [GO:0016020]; microtubule cytoskeleton [GO:0015630]; myelin sheath [GO:0043209]; paranode region of axon [GO:0033270]; plasma membrane [GO:0005886]; protein-containing complex [GO…
P16858	G3P_MOUSE	reviewed	Glyceraldehyde-3-phosphate dehydrogenase (GAPDH) (EC 1.2.1.12) (Peptidyl-cysteine S-nitrosylase GAPDH) (EC 2.6.99.-)	Gapdh Gapd	Mus musculus (Mouse)	333	cytoplasm [GO:0005737]; cytosol [GO:0005829]; GAIT complex [GO:0097452]; glutamatergic synapse [GO:0098978]; intracellular membrane-bounded organelle [GO:0043231]; late endosome lumen [GO:0031906]; lipid droplet [GO:0005811]; microtubule cytoskeleton [GO:0015630]; mitochondrion [GO:0005739]; myelin sheath [GO:0043209]; nuclear membrane [GO:0031965]; nucleus [GO:0005634]; plasma membrane [GO:00058…
P17156	HSP72_MOUSE	reviewed	Heat shock-related 70 kDa protein 2 (Heat shock protein 70.2)	Hspa2 Hcp70.2 Hsp70-2	Mus musculus (Mouse)	633	CatSper complex [GO:0036128]; cell surface [GO:0009986]; cytoplasm [GO:0005737]; cytosol [GO:0005829]; male germ cell nucleus [GO:0001673]; meiotic spindle [GO:0072687]; mitochondrion [GO:0005739]; myelin sheath [GO:0043209]; nucleoplasm [GO:0005654]; nucleus [GO:0005634]; plasma membrane [GO:0005886]; synaptonemal complex [GO:0000795]
P17182	ENOA_MOUSE	reviewed	Alpha-enolase (EC 4.2.1.11) (2-phospho-D-glycerate hydro-lyase) (Enolase 1) (Non-neural enolase) (NNE)	Eno1 Eno-1	Mus musculus (Mouse)	434	cell cortex region [GO:0099738]; cell surface [GO:0009986]; cytoplasm [GO:0005737]; cytosol [GO:0005829]; extrinsic component of plasma membrane [GO:0019897]; growth cone [GO:0030426]; membrane [GO:0016020]; membrane raft [GO:0045121]; myelin sheath [GO:0043209]; neuron projection [GO:0043005]; phosphopyruvate hydratase complex [GO:0000015]; plasma membrane [GO:0005886]; synaptic membrane [GO:009…
P17183	ENOG_MOUSE	reviewed	Gamma-enolase (EC 4.2.1.11) (2-phospho-D-glycerate hydro-lyase) (Enolase 2) (Neural enolase) (Neuron-specific enolase) (NSE)	Eno2 Eno-2	Mus musculus (Mouse)	434	cell cortex region [GO:0099738]; cell surface [GO:0009986]; cytoplasm [GO:0005737]; cytosol [GO:0005829]; growth cone [GO:0030426]; membrane [GO:0016020]; membrane raft [GO:0045121]; myelin sheath [GO:0043209]; neuronal cell body [GO:0043025]; neuron projection [GO:0043005]; perikaryon [GO:0043204]; phosphopyruvate hydratase complex [GO:0000015]; photoreceptor inner segment [GO:0001917]; plasma m…
P17426	AP2A1_MOUSE	reviewed	AP-2 complex subunit alpha-1 (100 kDa coated vesicle protein A) (Adaptor protein complex AP-2 subunit alpha-1) (Adaptor-related protein complex 2 subunit alpha-1) (Alpha-adaptin A) (Alpha1-adaptin) (Clathrin assembly protein complex 2 alpha-A large chain) (Plasma membrane adaptor HA2/AP2 adaptin alpha A subunit)	Ap2a1 Adtaa Clapa1	Mus musculus (Mouse)	977	AP-2 adaptor complex [GO:0030122]; apical plasma membrane [GO:0016324]; basolateral plasma membrane [GO:0016323]; clathrin-coated vesicle [GO:0030136]; filopodium tip [GO:0032433]; membrane coat [GO:0030117]; protein-containing complex [GO:0032991]; secretory granule [GO:0030141]
P17427	AP2A2_MOUSE	reviewed	AP-2 complex subunit alpha-2 (100 kDa coated vesicle protein C) (Adaptor protein complex AP-2 subunit alpha-2) (Adaptor-related protein complex 2 subunit alpha-2) (Alpha-adaptin C) (Alpha2-adaptin) (Clathrin assembly protein complex 2 alpha-C large chain) (Plasma membrane adaptor HA2/AP2 adaptin alpha C subunit)	Ap2a2 Adtab	Mus musculus (Mouse)	938	AP-2 adaptor complex [GO:0030122]; cytoplasmic vesicle [GO:0031410]; membrane coat [GO:0030117]; secretory granule [GO:0030141]; synaptic vesicle [GO:0008021]
P17710	HXK1_MOUSE	reviewed	Hexokinase-1 (EC 2.7.1.1) (Hexokinase type I) (HK I) (Hexokinase, tumor isozyme)	Hk1	Mus musculus (Mouse)	974	caveola [GO:0005901]; cytosol [GO:0005829]; membrane raft [GO:0045121]; mitochondrial outer membrane [GO:0005741]; mitochondrion [GO:0005739]; protein-containing complex [GO:0032991]
P17742	PPIA_MOUSE	reviewed	Peptidyl-prolyl cis-trans isomerase A (PPIase A) (EC 5.2.1.8) (Cyclophilin A) (Cyclosporin A-binding protein) (Rotamase A) (SP18) [Cleaved into: Peptidyl-prolyl cis-trans isomerase A, N-terminally processed]	Ppia	Mus musculus (Mouse)	164	cytoplasm [GO:0005737]; cytosol [GO:0005829]; extracellular region [GO:0005576]; extracellular space [GO:0005615]; intracellular membrane-bounded organelle [GO:0043231]; myelin sheath [GO:0043209]; nucleus [GO:0005634]; protein-containing complex [GO:0032991]
P17751	TPIS_MOUSE	reviewed	Triosephosphate isomerase (TIM) (EC 5.3.1.1) (Methylglyoxal synthase) (EC 4.2.3.3) (Triose-phosphate isomerase)	Tpi1 Tpi	Mus musculus (Mouse)	249	cytosol [GO:0005829]
P17809	GTR1_MOUSE	reviewed	Solute carrier family 2, facilitated glucose transporter member 1 (Glucose transporter type 1, erythrocyte/brain) (GLUT-1) (GT1)	Slc2a1 Glut1	Mus musculus (Mouse)	492	apical plasma membrane [GO:0016324]; basolateral plasma membrane [GO:0016323]; caveola [GO:0005901]; cell-cell junction [GO:0005911]; cortical actin cytoskeleton [GO:0030864]; cytoplasm [GO:0005737]; cytosol [GO:0005829]; female pronucleus [GO:0001939]; integral component of plasma membrane [GO:0005887]; intercalated disc [GO:0014704]; membrane [GO:0016020]; membrane raft [GO:0045121]; midbody [G…
P18242	CATD_MOUSE	reviewed	Cathepsin D (EC 3.4.23.5)	Ctsd	Mus musculus (Mouse)	410	collagen-containing extracellular matrix [GO:0062023]; endosome membrane [GO:0010008]; extracellular space [GO:0005615]; lysosomal membrane [GO:0005765]; lysosome [GO:0005764]; melanosome [GO:0042470]; membrane raft [GO:0045121]; mitochondrion [GO:0005739]
P18572	BASI_MOUSE	reviewed	Basigin (Basic immunoglobulin superfamily) (HT7 antigen) (Membrane glycoprotein gp42) (CD antigen CD147)	Bsg	Mus musculus (Mouse)	389	acrosomal membrane [GO:0002080]; axon [GO:0030424]; basolateral plasma membrane [GO:0016323]; endoplasmic reticulum membrane [GO:0005789]; endosome [GO:0005768]; integral component of plasma membrane [GO:0005887]; intracellular membrane-bounded organelle [GO:0043231]; membrane raft [GO:0045121]; mitochondrion [GO:0005739]; photoreceptor inner segment [GO:0001917]; photoreceptor outer segment [GO:…
P18760	COF1_MOUSE	reviewed	Cofilin-1 (Cofilin, non-muscle isoform)	Cfl1	Mus musculus (Mouse)	166	actin cytoskeleton [GO:0015629]; cell-cell junction [GO:0005911]; cell leading edge [GO:0031252]; cofilin-actin rod [GO:0090732]; cortical actin cytoskeleton [GO:0030864]; cytoplasm [GO:0005737]; cytosol [GO:0005829]; dendritic spine [GO:0043197]; extracellular region [GO:0005576]; filopodium [GO:0030175]; focal adhesion [GO:0005925]; glutamatergic synapse [GO:0098978]; growth cone [GO:0030426]; …
P18872	GNAO_MOUSE	reviewed	Guanine nucleotide-binding protein G(o) subunit alpha	Gnao1 Gna0 Gnao	Mus musculus (Mouse)	354	cell body [GO:0044297]; dendrite [GO:0030425]; heterotrimeric G-protein complex [GO:0005834]; membrane [GO:0016020]; myelin sheath [GO:0043209]; neuron projection [GO:0043005]; plasma membrane [GO:0005886]
P19096	FAS_MOUSE	reviewed	Fatty acid synthase (EC 2.3.1.85) (Type I Fatty Acid Synthase) [Includes: [Acyl-carrier-protein] S-acetyltransferase (EC 2.3.1.38); [Acyl-carrier-protein] S-malonyltransferase (EC 2.3.1.39); 3-oxoacyl-[acyl-carrier-protein] synthase (EC 2.3.1.41); 3-oxoacyl-[acyl-carrier-protein] reductase (EC 1.1.1.100); 3-hydroxyacyl-[acyl-carrier-protein] dehydratase (EC 4.2.1.59); Enoyl-[acyl-carrier-protein]…	Fasn	Mus musculus (Mouse)	2504	cytoplasm [GO:0005737]; cytosol [GO:0005829]; glycogen granule [GO:0042587]; Golgi apparatus [GO:0005794]; melanosome [GO:0042470]; mitochondrion [GO:0005739]; plasma membrane [GO:0005886]
P19157	GSTP1_MOUSE	reviewed	Glutathione S-transferase P 1 (Gst P1) (EC 2.5.1.18) (GST YF-YF) (GST class-pi) (GST-piB) (Preadipocyte growth factor)	Gstp1 Gstpib	Mus musculus (Mouse)	210	cytoplasm [GO:0005737]; cytosol [GO:0005829]; mitochondrion [GO:0005739]; nucleus [GO:0005634]; plasma membrane [GO:0005886]; protein-containing complex [GO:0032991]; TRAF2-GSTP1 complex [GO:0097057]
P19246	NFH_MOUSE	reviewed	Neurofilament heavy polypeptide (NF-H) (200 kDa neurofilament protein) (Neurofilament triplet H protein)	Nefh Kiaa0845 Nfh	Mus musculus (Mouse)	1090	apical dendrite [GO:0097440]; axon [GO:0030424]; basal proximal dendrite [GO:0150017]; cytoplasm [GO:0005737]; cytoskeleton [GO:0005856]; intermediate filament [GO:0005882]; mitochondrion [GO:0005739]; myelin sheath [GO:0043209]; neurofibrillary tangle [GO:0097418]; neurofilament [GO:0005883]; neuronal cell body [GO:0043025]; nucleus [GO:0005634]; perikaryon [GO:0043204]; postsynaptic density [GO…
P19536	COX5B_MOUSE	reviewed	Cytochrome c oxidase subunit 5B, mitochondrial (Cytochrome c oxidase polypeptide Vb)	Cox5b	Mus musculus (Mouse)	128	mitochondrial inner membrane [GO:0005743]; mitochondrial respiratory chain complex IV [GO:0005751]; mitochondrion [GO:0005739]; myelin sheath [GO:0043209]
P19783	COX41_MOUSE	reviewed	Cytochrome c oxidase subunit 4 isoform 1, mitochondrial (Cytochrome c oxidase polypeptide IV) (Cytochrome c oxidase subunit IV isoform 1) (COX IV-1)	Cox4i1 Cox4 Cox4a	Mus musculus (Mouse)	169	cytosol [GO:0005829]; integral component of membrane [GO:0016021]; mitochondrial inner membrane [GO:0005743]; mitochondrial membrane [GO:0031966]; mitochondrial respiratory chain complex IV [GO:0005751]; mitochondrion [GO:0005739]; nucleoplasm [GO:0005654]
P20029	BIP_MOUSE	reviewed	Endoplasmic reticulum chaperone BiP (EC 3.6.4.10) (78 kDa glucose-regulated protein) (GRP-78) (Binding-immunoglobulin protein) (BiP) (Heat shock protein 70 family protein 5) (HSP70 family protein 5) (Heat shock protein family A member 5) (Immunoglobulin heavy chain-binding protein)	Hspa5 Grp78	Mus musculus (Mouse)	655	cell surface [GO:0009986]; COP9 signalosome [GO:0008180]; cytoplasm [GO:0005737]; cytosol [GO:0005829]; endoplasmic reticulum [GO:0005783]; endoplasmic reticulum chaperone complex [GO:0034663]; endoplasmic reticulum-Golgi intermediate compartment [GO:0005793]; endoplasmic reticulum lumen [GO:0005788]; endoplasmic reticulum membrane [GO:0005789]; extracellular region [GO:0005576]; integral compone…
P20108	PRDX3_MOUSE	reviewed	Thioredoxin-dependent peroxide reductase, mitochondrial (EC 1.11.1.24) (Antioxidant protein 1) (AOP-1) (PRX III) (Perioredoxin-3) (Protein MER5) (Thioredoxin-dependent peroxiredoxin 3)	Prdx3 Aop1 Mer5	Mus musculus (Mouse)	257	cytoplasm [GO:0005737]; cytosol [GO:0005829]; early endosome [GO:0005769]; mitochondrion [GO:0005739]; myelin sheath [GO:0043209]; protein-containing complex [GO:0032991]
P20152	VIME_MOUSE	reviewed	Vimentin	Vim	Mus musculus (Mouse)	466	axon [GO:0030424]; cell body [GO:0044297]; cell leading edge [GO:0031252]; cell projection [GO:0042995]; cytoplasm [GO:0005737]; cytoskeleton [GO:0005856]; cytosol [GO:0005829]; intermediate filament [GO:0005882]; intermediate filament cytoskeleton [GO:0045111]; neuron projection [GO:0043005]; nuclear matrix [GO:0016363]; perinuclear region of cytoplasm [GO:0048471]; peroxisome [GO:0005777]; phag…
P20357	MTAP2_MOUSE	reviewed	Microtubule-associated protein 2 (MAP-2)	Map2 Mtap2	Mus musculus (Mouse)	1828	actin cytoskeleton [GO:0015629]; apical dendrite [GO:0097440]; apical distal dendrite [GO:0150014]; axon [GO:0030424]; axon hillock [GO:0043203]; axon initial segment [GO:0043194]; basal dendrite [GO:0097441]; CA3 pyramidal cell dendrite [GO:0097442]; cell body [GO:0044297]; cytoplasm [GO:0005737]; dendrite [GO:0030425]; dendrite cytoplasm [GO:0032839]; dendritic branch [GO:0044307]; dendritic fi…
P20444	KPCA_MOUSE	reviewed	Protein kinase C alpha type (PKC-A) (PKC-alpha) (EC 2.7.11.13)	Prkca Pkca	Mus musculus (Mouse)	672	alphav-beta3 integrin-PKCalpha complex [GO:0035866]; apical part of cell [GO:0045177]; axon [GO:0030424]; calyx of Held [GO:0044305]; cytoplasm [GO:0005737]; cytosol [GO:0005829]; dendrite [GO:0030425]; endoplasmic reticulum [GO:0005783]; intercalated disc [GO:0014704]; membrane [GO:0016020]; membrane raft [GO:0045121]; mitochondrial membrane [GO:0031966]; mitochondrion [GO:0005739]; neuronal cel…
P20917	MAG_MOUSE	reviewed	Myelin-associated glycoprotein (Siglec-4a)	Mag	Mus musculus (Mouse)	627	compact myelin [GO:0043218]; cytoplasm [GO:0005737]; integral component of plasma membrane [GO:0005887]; membrane raft [GO:0045121]; mesaxon [GO:0097453]; myelin sheath [GO:0043209]; myelin sheath adaxonal region [GO:0035749]; paranode region of axon [GO:0033270]; plasma membrane [GO:0005886]; Schmidt-Lanterman incisure [GO:0043220]
P21107	TPM3_MOUSE	reviewed	Tropomyosin alpha-3 chain (Gamma-tropomyosin) (Tropomyosin-3)	Tpm3 Tpm-5 Tpm5	Mus musculus (Mouse)	285	actin cytoskeleton [GO:0015629]; actin filament [GO:0005884]; cleavage furrow [GO:0032154]; cortical cytoskeleton [GO:0030863]; cytoplasm [GO:0005737]; cytosol [GO:0005829]; growth cone [GO:0030426]; neuron projection [GO:0043005]; podosome [GO:0002102]; stress fiber [GO:0001725]
P21126	UBL4A_MOUSE	reviewed	Ubiquitin-like protein 4A (Ubiquitin-like protein GDX)	Ubl4a Gdx Ubl4	Mus musculus (Mouse)	157	BAT3 complex [GO:0071818]; cytoplasm [GO:0005737]; cytosol [GO:0005829]; membrane [GO:0016020]; nucleoplasm [GO:0005654]; nucleus [GO:0005634]
P21278	GNA11_MOUSE	reviewed	Guanine nucleotide-binding protein subunit alpha-11 (G alpha-11) (G-protein subunit alpha-11)	Gna11 Gna-11	Mus musculus (Mouse)	359	cytoplasm [GO:0005737]; cytosol [GO:0005829]; heterotrimeric G-protein complex [GO:0005834]; plasma membrane [GO:0005886]
P21279	GNAQ_MOUSE	reviewed	Guanine nucleotide-binding protein G(q) subunit alpha (Guanine nucleotide-binding protein alpha-q)	Gnaq	Mus musculus (Mouse)	359	caveola [GO:0005901]; cell body [GO:0044297]; cytosol [GO:0005829]; dendrite [GO:0030425]; Golgi apparatus [GO:0005794]; heterotrimeric G-protein complex [GO:0005834]; membrane [GO:0016020]; nuclear membrane [GO:0031965]; plasma membrane [GO:0005886]; synapse [GO:0045202]
P21460	CYTC_MOUSE	reviewed	Cystatin-C (Cystatin-3)	Cst3	Mus musculus (Mouse)	140	axon [GO:0030424]; basement membrane [GO:0005604]; cell projection [GO:0042995]; collagen-containing extracellular matrix [GO:0062023]; contractile fiber [GO:0043292]; cytoplasm [GO:0005737]; endoplasmic reticulum [GO:0005783]; extracellular region [GO:0005576]; extracellular space [GO:0005615]; Golgi apparatus [GO:0005794]; lysosome [GO:0005764]; multivesicular body [GO:0005771]; neuronal cell b…
P21619	LMNB2_MOUSE	reviewed	Lamin-B2	Lmnb2	Mus musculus (Mouse)	596	lamin filament [GO:0005638]; nuclear envelope [GO:0005635]; nuclear inner membrane [GO:0005637]; nuclear membrane [GO:0031965]; nucleus [GO:0005634]
P21836	ACES_MOUSE	reviewed	Acetylcholinesterase (AChE) (EC 3.1.1.7)	Ache	Mus musculus (Mouse)	614	anchored component of membrane [GO:0031225]; axon [GO:0030424]; basement membrane [GO:0005604]; cell surface [GO:0009986]; cytoplasm [GO:0005737]; dendrite [GO:0030425]; endoplasmic reticulum lumen [GO:0005788]; extracellular region [GO:0005576]; extracellular space [GO:0005615]; Golgi apparatus [GO:0005794]; membrane [GO:0016020]; neuromuscular junction [GO:0031594]; neuronal cell body [GO:00430…
P22437	PGH1_MOUSE	reviewed	Prostaglandin G/H synthase 1 (EC 1.14.99.1) (Cyclooxygenase-1) (COX-1) (Prostaglandin H2 synthase 1) (PGH synthase 1) (PGHS-1) (PHS 1) (Prostaglandin-endoperoxide synthase 1)	Ptgs1 Cox-1 Cox1	Mus musculus (Mouse)	602	cytoplasm [GO:0005737]; endoplasmic reticulum membrane [GO:0005789]; Golgi apparatus [GO:0005794]; intracellular membrane-bounded organelle [GO:0043231]; nuclear envelope [GO:0005635]; photoreceptor outer segment [GO:0001750]
P22682	CBL_MOUSE	reviewed	E3 ubiquitin-protein ligase CBL (EC 2.3.2.27) (Casitas B-lineage lymphoma proto-oncogene) (Proto-oncogene c-Cbl) (RING-type E3 ubiquitin transferase CBL) (Signal transduction protein CBL)	Cbl	Mus musculus (Mouse)	913	axon [GO:0030424]; cilium [GO:0005929]; cytosol [GO:0005829]; flotillin complex [GO:0016600]; focal adhesion [GO:0005925]; Golgi apparatus [GO:0005794]; growth cone [GO:0030426]; membrane raft [GO:0045121]; perinuclear region of cytoplasm [GO:0048471]; plasma membrane [GO:0005886]
P22892	AP1G1_MOUSE	reviewed	AP-1 complex subunit gamma-1 (Adaptor protein complex AP-1 subunit gamma-1) (Adaptor-related protein complex 1 subunit gamma-1) (Clathrin assembly protein complex 1 gamma-1 large chain) (Gamma-adaptin) (Gamma1-adaptin) (Golgi adaptor HA1/AP1 adaptin subunit gamma-1)	Ap1g1 Adtg Clapg1	Mus musculus (Mouse)	822	AP-1 adaptor complex [GO:0030121]; clathrin-coated vesicle [GO:0030136]; cytosol [GO:0005829]; Golgi apparatus [GO:0005794]; intracellular membrane-bounded organelle [GO:0043231]; microtubule cytoskeleton [GO:0015630]; perinuclear region of cytoplasm [GO:0048471]; recycling endosome [GO:0055037]; trans-Golgi network [GO:0005802]
P23116	EIF3A_MOUSE	reviewed	Eukaryotic translation initiation factor 3 subunit A (eIF3a) (Centrosomin) (Eukaryotic translation initiation factor 3 subunit 10) (eIF-3-theta) (eIF3 p167) (eIF3 p180) (eIF3 p185) (p162)	Eif3a Csma Eif3 Eif3s10	Mus musculus (Mouse)	1344	cytosol [GO:0005829]; eukaryotic 43S preinitiation complex [GO:0016282]; eukaryotic 48S preinitiation complex [GO:0033290]; eukaryotic translation initiation factor 3 complex [GO:0005852]; eukaryotic translation initiation factor 3 complex, eIF3e [GO:0071540]; eukaryotic translation initiation factor 3 complex, eIF3m [GO:0071541]; microtubule [GO:0005874]; microtubule organizing center [GO:000581…
P23242	CXA1_MOUSE	reviewed	Gap junction alpha-1 protein (Connexin-43) (Cx43) (Gap junction 43 kDa heart protein)	Gja1 Cxn-43	Mus musculus (Mouse)	382	apical plasma membrane [GO:0016324]; cell-cell contact zone [GO:0044291]; cell-cell junction [GO:0005911]; cell junction [GO:0030054]; connexin complex [GO:0005922]; contractile fiber [GO:0043292]; cytoplasm [GO:0005737]; cytosol [GO:0005829]; early endosome [GO:0005769]; endoplasmic reticulum [GO:0005783]; endosome [GO:0005768]; fascia adherens [GO:0005916]; gap junction [GO:0005921]; Golgi appa…
P23506	PIMT_MOUSE	reviewed	Protein-L-isoaspartate(D-aspartate) O-methyltransferase (PIMT) (EC 2.1.1.77) (L-isoaspartyl protein carboxyl methyltransferase) (Protein L-isoaspartyl/D-aspartyl methyltransferase) (Protein-beta-aspartate methyltransferase)	Pcmt1	Mus musculus (Mouse)	227	basolateral plasma membrane [GO:0016323]; brush border membrane [GO:0031526]; cytoplasm [GO:0005737]; cytosol [GO:0005829]; extracellular space [GO:0005615]; neuron projection [GO:0043005]; perikaryon [GO:0043204]
P23591	FCL_MOUSE	reviewed	GDP-L-fucose synthase (EC 1.1.1.271) (GDP-4-keto-6-deoxy-D-mannose-3,5-epimerase-4-reductase) (Protein FX) (Red cell NADP(H)-binding protein) (Transplantation antigen P35B) (Tum-P35B antigen)	Gfus P35b Tsta3 Tstap35b	Mus musculus (Mouse)	321
P23818	GRIA1_MOUSE	reviewed	Glutamate receptor 1 (GluR-1) (AMPA-selective glutamate receptor 1) (GluR-A) (GluR-K1) (Glutamate receptor ionotropic, AMPA 1) (GluA1)	Gria1 Glur1	Mus musculus (Mouse)	907	AMPA glutamate receptor complex [GO:0032281]; asymmetric synapse [GO:0032279]; axonal spine [GO:0044308]; cell body [GO:0044297]; cell-cell junction [GO:0005911]; cell surface [GO:0009986]; cytosol [GO:0005829]; dendrite [GO:0030425]; dendrite membrane [GO:0032590]; dendritic shaft [GO:0043198]; dendritic spine [GO:0043197]; dendritic spine membrane [GO:0032591]; early endosome [GO:0005769]; earl…
P23819	GRIA2_MOUSE	reviewed	Glutamate receptor 2 (GluR-2) (AMPA-selective glutamate receptor 2) (GluR-B) (GluR-K2) (Glutamate receptor ionotropic, AMPA 2) (GluA2)	Gria2 Glur2	Mus musculus (Mouse)	883	AMPA glutamate receptor complex [GO:0032281]; asymmetric synapse [GO:0032279]; cell surface [GO:0009986]; dendrite [GO:0030425]; dendrite cytoplasm [GO:0032839]; dendritic shaft [GO:0043198]; dendritic spine [GO:0043197]; endoplasmic reticulum [GO:0005783]; endoplasmic reticulum membrane [GO:0005789]; glutamatergic synapse [GO:0098978]; growth cone [GO:0030426]; integral component of plasma membr…
P24270	CATA_MOUSE	reviewed	Catalase (EC 1.11.1.6)	Cat Cas-1 Cas1	Mus musculus (Mouse)	527	cytoplasm [GO:0005737]; cytosol [GO:0005829]; endoplasmic reticulum [GO:0005783]; extracellular space [GO:0005615]; Golgi apparatus [GO:0005794]; intracellular membrane-bounded organelle [GO:0043231]; lysosome [GO:0005764]; mitochondrial intermembrane space [GO:0005758]; mitochondrion [GO:0005739]; peroxisomal membrane [GO:0005778]; peroxisome [GO:0005777]; plasma membrane [GO:0005886]; protein-c…
P24288	BCAT1_MOUSE	reviewed	Branched-chain-amino-acid aminotransferase, cytosolic (BCAT(c)) (EC 2.6.1.42) (Protein ECA39)	Bcat1 Eca39	Mus musculus (Mouse)	386	cytoplasm [GO:0005737]; cytosol [GO:0005829]; mitochondrion [GO:0005739]
P24369	PPIB_MOUSE	reviewed	Peptidyl-prolyl cis-trans isomerase B (PPIase B) (EC 5.2.1.8) (CYP-S1) (Cyclophilin B) (Rotamase B) (S-cyclophilin) (SCYLP)	Ppib	Mus musculus (Mouse)	216	cytoplasm [GO:0005737]; endoplasmic reticulum [GO:0005783]; endoplasmic reticulum chaperone complex [GO:0034663]; endoplasmic reticulum lumen [GO:0005788]; intracellular membrane-bounded organelle [GO:0043231]; melanosome [GO:0042470]; nucleoplasm [GO:0005654]; perinuclear region of cytoplasm [GO:0048471]; protein-containing complex [GO:0032991]; smooth endoplasmic reticulum [GO:0005790]
P24527	LKHA4_MOUSE	reviewed	Leukotriene A-4 hydrolase (LTA-4 hydrolase) (EC 3.3.2.6) (Leukotriene A(4) hydrolase) (Tripeptide aminopeptidase LTA4H) (EC 3.4.11.4)	Lta4h	Mus musculus (Mouse)	611	cytoplasm [GO:0005737]; cytosol [GO:0005829]; nucleoplasm [GO:0005654]; nucleus [GO:0005634]
P24529	TY3H_MOUSE	reviewed	Tyrosine 3-monooxygenase (EC 1.14.16.2) (Tyrosine 3-hydroxylase) (TH)	Th	Mus musculus (Mouse)	498	axon [GO:0030424]; cytoplasm [GO:0005737]; cytoplasmic side of plasma membrane [GO:0009898]; cytoplasmic vesicle [GO:0031410]; cytoplasmic vesicle membrane [GO:0030659]; cytosol [GO:0005829]; dendrite [GO:0030425]; melanosome membrane [GO:0033162]; mitochondrion [GO:0005739]; neuronal cell body [GO:0043025]; neuron projection [GO:0043005]; nucleus [GO:0005634]; perikaryon [GO:0043204]; perinuclea…
P24547	IMDH2_MOUSE	reviewed	Inosine-5'-monophosphate dehydrogenase 2 (IMP dehydrogenase 2) (IMPD 2) (IMPDH 2) (EC 1.1.1.205) (IMPDH-II)	Impdh2	Mus musculus (Mouse)	514	cytoplasm [GO:0005737]; cytosol [GO:0005829]; nucleus [GO:0005634]
P24549	AL1A1_MOUSE	reviewed	Aldehyde dehydrogenase 1A1 (EC 1.2.1.19) (EC 1.2.1.28) (EC 1.2.1.3) (EC 1.2.1.36) (3-deoxyglucosone dehydrogenase) (ALDH-E1) (ALHDII) (Aldehyde dehydrogenase family 1 member A1) (Aldehyde dehydrogenase, cytosolic) (Retinal dehydrogenase 1) (RALDH 1) (RalDH1)	Aldh1a1 Ahd-2 Ahd2 Aldh1	Mus musculus (Mouse)	501	axon [GO:0030424]; cytoplasm [GO:0005737]; cytosol [GO:0005829]; nucleus [GO:0005634]; synapse [GO:0045202]
P24668	MPRD_MOUSE	reviewed	Cation-dependent mannose-6-phosphate receptor (CD Man-6-P receptor) (CD-MPR) (46 kDa mannose 6-phosphate receptor) (MPR 46)	M6pr 46mpr	Mus musculus (Mouse)	278	endosome [GO:0005768]; integral component of membrane [GO:0016021]; late endosome [GO:0005770]; lysosomal membrane [GO:0005765]; perinuclear region of cytoplasm [GO:0048471]; trans-Golgi network [GO:0005802]
P25444	RS2_MOUSE	reviewed	40S ribosomal protein S2 (40S ribosomal protein S4) (Protein LLRep3)	Rps2 Llrep3 Rps4	Mus musculus (Mouse)	293	cytosol [GO:0005829]; cytosolic ribosome [GO:0022626]; cytosolic small ribosomal subunit [GO:0022627]; nucleoplasm [GO:0005654]; ribonucleoprotein complex [GO:1990904]; synapse [GO:0045202]
P26039	TLN1_MOUSE	reviewed	Talin-1	Tln1 Tln	Mus musculus (Mouse)	2541	adherens junction [GO:0005912]; cell surface [GO:0009986]; cytoplasm [GO:0005737]; cytoskeleton [GO:0005856]; focal adhesion [GO:0005925]; plasma membrane [GO:0005886]; ruffle [GO:0001726]; ruffle membrane [GO:0032587]
P26040	EZRI_MOUSE	reviewed	Ezrin (Cytovillin) (Villin-2) (p81)	Ezr Vil2	Mus musculus (Mouse)	586	actin cytoskeleton [GO:0015629]; actin filament [GO:0005884]; apical part of cell [GO:0045177]; apical plasma membrane [GO:0016324]; astrocyte projection [GO:0097449]; basolateral plasma membrane [GO:0016323]; brush border [GO:0005903]; cell body [GO:0044297]; cell cortex [GO:0005938]; cell periphery [GO:0071944]; cell projection [GO:0042995]; cell tip [GO:0051286]; ciliary basal body [GO:0036064…
P26043	RADI_MOUSE	reviewed	Radixin (ESP10)	Rdx	Mus musculus (Mouse)	583	adherens junction [GO:0005912]; apical part of cell [GO:0045177]; apical plasma membrane [GO:0016324]; cell periphery [GO:0071944]; cell tip [GO:0051286]; cleavage furrow [GO:0032154]; cortical actin cytoskeleton [GO:0030864]; cytosol [GO:0005829]; filopodium [GO:0030175]; lamellipodium [GO:0030027]; microvillus [GO:0005902]; midbody [GO:0030496]; myelin sheath [GO:0043209]; plasma membrane [GO:0…
P26369	U2AF2_MOUSE	reviewed	Splicing factor U2AF 65 kDa subunit (U2 auxiliary factor 65 kDa subunit) (U2 snRNP auxiliary factor large subunit)	U2af2 U2af65	Mus musculus (Mouse)	475	commitment complex [GO:0000243]; nuclear speck [GO:0016607]; nucleus [GO:0005634]; Prp19 complex [GO:0000974]; spliceosomal complex [GO:0005681]; U2AF complex [GO:0089701]; U2-type prespliceosome [GO:0071004]
P26443	DHE3_MOUSE	reviewed	Glutamate dehydrogenase 1, mitochondrial (GDH 1) (EC 1.4.1.3)	Glud1 Glud	Mus musculus (Mouse)	558	cytoplasm [GO:0005737]; endoplasmic reticulum [GO:0005783]; mitochondrial inner membrane [GO:0005743]; mitochondrial matrix [GO:0005759]; mitochondrion [GO:0005739]
P26450	P85A_MOUSE	reviewed	Phosphatidylinositol 3-kinase regulatory subunit alpha (PI3-kinase regulatory subunit alpha) (PI3K regulatory subunit alpha) (PtdIns-3-kinase regulatory subunit alpha) (Phosphatidylinositol 3-kinase 85 kDa regulatory subunit alpha) (PI3-kinase subunit p85-alpha) (PtdIns-3-kinase regulatory subunit p85-alpha)	Pik3r1	Mus musculus (Mouse)	724	cell-cell junction [GO:0005911]; cis-Golgi network [GO:0005801]; cytoplasm [GO:0005737]; cytosol [GO:0005829]; membrane [GO:0016020]; neuron projection [GO:0043005]; nucleus [GO:0005634]; perinuclear endoplasmic reticulum membrane [GO:1990578]; perinuclear region of cytoplasm [GO:0048471]; phosphatidylinositol 3-kinase complex [GO:0005942]; phosphatidylinositol 3-kinase complex, class IA [GO:0005…
P26638	SYSC_MOUSE	reviewed	Serine--tRNA ligase, cytoplasmic (EC 6.1.1.11) (Seryl-tRNA synthetase) (SerRS) (Seryl-tRNA(Ser/Sec) synthetase)	Sars1 Sars Sers	Mus musculus (Mouse)	512	cytoplasm [GO:0005737]; cytosol [GO:0005829]; mitochondrion [GO:0005739]; nucleus [GO:0005634]
P26645	MARCS_MOUSE	reviewed	Myristoylated alanine-rich C-kinase substrate (MARCKS)	Marcks Macs	Mus musculus (Mouse)	309	actin filament bundle [GO:0032432]; cell cortex [GO:0005938]; centrosome [GO:0005813]; cytoplasm [GO:0005737]; germinal vesicle [GO:0042585]; membrane [GO:0016020]; plasma membrane [GO:0005886]
P27546	MAP4_MOUSE	reviewed	Microtubule-associated protein 4 (MAP-4)	Map4 Mtap4	Mus musculus (Mouse)	1125	axon [GO:0030424]; axoneme [GO:0005930]; cytosol [GO:0005829]; microtubule [GO:0005874]; microtubule cytoskeleton [GO:0015630]; mitotic spindle [GO:0072686]; neuron projection [GO:0043005]; plasma membrane [GO:0005886]; postsynaptic density [GO:0014069]
P27601	GNA13_MOUSE	reviewed	Guanine nucleotide-binding protein subunit alpha-13 (G alpha-13) (G-protein subunit alpha-13)	Gna13 Gna-13	Mus musculus (Mouse)	377	brush border membrane [GO:0031526]; cytoplasm [GO:0005737]; cytosol [GO:0005829]; heterotrimeric G-protein complex [GO:0005834]; melanosome [GO:0042470]; nucleus [GO:0005634]; plasma membrane [GO:0005886]
P27612	PLAP_MOUSE	reviewed	Phospholipase A-2-activating protein (PLA2P) (PLAP)	Plaa Plap	Mus musculus (Mouse)	794	cytoplasm [GO:0005737]; extracellular exosome [GO:0070062]; nucleus [GO:0005634]; synapse [GO:0045202]
P27659	RL3_MOUSE	reviewed	60S ribosomal protein L3 (J1 protein)	Rpl3	Mus musculus (Mouse)	403	cytosol [GO:0005829]; cytosolic large ribosomal subunit [GO:0022625]; cytosolic ribosome [GO:0022626]; nucleolus [GO:0005730]; protein-containing complex [GO:0032991]; ribosome [GO:0005840]; synapse [GO:0045202]
P27671	RGRF1_MOUSE	reviewed	Ras-specific guanine nucleotide-releasing factor 1 (Ras-GRF1) (CDC25Mm) (Guanine nucleotide-releasing protein) (GNRP) (Ras-specific nucleotide exchange factor CDC25)	Rasgrf1 Cdc25 Grf1	Mus musculus (Mouse)	1262	apical dendrite [GO:0097440]; apicolateral plasma membrane [GO:0016327]; basolateral plasma membrane [GO:0016323]; cytoplasm [GO:0005737]; cytosol [GO:0005829]; growth cone [GO:0030426]; neuronal cell body [GO:0043025]
P27773	PDIA3_MOUSE	reviewed	Protein disulfide-isomerase A3 (EC 5.3.4.1) (58 kDa glucose-regulated protein) (58 kDa microsomal protein) (p58) (Disulfide isomerase ER-60) (Endoplasmic reticulum resident protein 57) (ER protein 57) (ERp57) (Endoplasmic reticulum resident protein 60) (ER protein 60) (ERp60)	Pdia3 Erp Erp60 Grp58	Mus musculus (Mouse)	505	acrosomal vesicle [GO:0001669]; apical plasma membrane [GO:0016324]; cell surface [GO:0009986]; cytoplasm [GO:0005737]; endoplasmic reticulum [GO:0005783]; endoplasmic reticulum lumen [GO:0005788]; extracellular region [GO:0005576]; extracellular space [GO:0005615]; melanosome [GO:0042470]; MHC class I peptide loading complex [GO:0042824]; mitochondrial intermembrane space [GO:0005758]; mitochond…
P28028	BRAF_MOUSE	reviewed	Serine/threonine-protein kinase B-raf (EC 2.7.11.1) (Proto-oncogene B-Raf)	Braf B-raf	Mus musculus (Mouse)	751	cell body [GO:0044297]; cytoplasm [GO:0005737]; cytosol [GO:0005829]; intracellular membrane-bounded organelle [GO:0043231]; membrane [GO:0016020]; mitochondrion [GO:0005739]; neuron projection [GO:0043005]; nucleus [GO:0005634]; plasma membrane [GO:0005886]
P28184	MT3_MOUSE	reviewed	Metallothionein-3 (MT-3) (Growth inhibitory factor) (GIF) (Metallothionein-III) (MT-III)	Mt3	Mus musculus (Mouse)	68	cytoplasm [GO:0005737]; cytosol [GO:0005829]; inclusion body [GO:0016234]; nucleus [GO:0005634]; perinuclear region of cytoplasm [GO:0048471]; synaptic vesicle [GO:0008021]
P28271	ACOHC_MOUSE	reviewed	Cytoplasmic aconitate hydratase (Aconitase) (EC 4.2.1.3) (Citrate hydro-lyase) (Iron regulatory protein 1) (IRP1) (Iron-responsive element-binding protein 1) (IRE-BP 1)	Aco1 Ireb1 Irebp	Mus musculus (Mouse)	889	cytoplasm [GO:0005737]; cytosol [GO:0005829]; endoplasmic reticulum [GO:0005783]; Golgi apparatus [GO:0005794]; intracellular membrane-bounded organelle [GO:0043231]; mitochondrion [GO:0005739]
P28352	APEX1_MOUSE	reviewed	DNA-(apurinic or apyrimidinic site) endonuclease (EC 3.1.-.-) (APEX nuclease) (APEN) (Apurinic-apyrimidinic endonuclease 1) (AP endonuclease 1) (REF-1) (Redox factor-1) [Cleaved into: DNA-(apurinic or apyrimidinic site) endonuclease, mitochondrial]	Apex1 Ape Apex Ref1	Mus musculus (Mouse)	317	centrosome [GO:0005813]; cytoplasm [GO:0005737]; endoplasmic reticulum [GO:0005783]; mitochondrion [GO:0005739]; nuclear speck [GO:0016607]; nucleolus [GO:0005730]; nucleoplasm [GO:0005654]; nucleus [GO:0005634]; perinuclear region of cytoplasm [GO:0048471]; transcription regulator complex [GO:0005667]
P28474	ADHX_MOUSE	reviewed	Alcohol dehydrogenase class-3 (EC 1.1.1.1) (Alcohol dehydrogenase 2) (Alcohol dehydrogenase 5) (Alcohol dehydrogenase B2) (ADH-B2) (Alcohol dehydrogenase class-III) (Glutathione-dependent formaldehyde dehydrogenase) (FALDH) (FDH) (GSH-FDH) (EC 1.1.1.-) (S-(hydroxymethyl)glutathione dehydrogenase) (EC 1.1.1.284)	Adh5 Adh-2 Adh2	Mus musculus (Mouse)	374	cytoplasm [GO:0005737]; cytosol [GO:0005829]; mitochondrion [GO:0005739]; nucleus [GO:0005634]
P28652	KCC2B_MOUSE	reviewed	Calcium/calmodulin-dependent protein kinase type II subunit beta (CaM kinase II subunit beta) (CaMK-II subunit beta) (EC 2.7.11.17)	Camk2b Camk2d	Mus musculus (Mouse)	542	calcium- and calmodulin-dependent protein kinase complex [GO:0005954]; cytoplasm [GO:0005737]; cytosol [GO:0005829]; dendrite [GO:0030425]; glutamatergic synapse [GO:0098978]; microtubule organizing center [GO:0005815]; neuron projection [GO:0043005]; perikaryon [GO:0043204]; postsynaptic density [GO:0014069]; sarcoplasmic reticulum membrane [GO:0033017]; spindle midzone [GO:0051233]
P28656	NP1L1_MOUSE	reviewed	Nucleosome assembly protein 1-like 1 (Brain protein DN38) (NAP-1-related protein)	Nap1l1 Nrp	Mus musculus (Mouse)	391	chromatin [GO:0000785]; cytoplasm [GO:0005737]; melanosome [GO:0042470]; neuron projection [GO:0043005]; nucleus [GO:0005634]
P28660	NCKP1_MOUSE	reviewed	Nck-associated protein 1 (NAP 1) (Brain protein H19) (MH19) (Membrane-associated protein HEM-2) (p125Nap1)	Nckap1 Hem2 Kiaa0587 Nap1	Mus musculus (Mouse)	1128	filamentous actin [GO:0031941]; integral component of membrane [GO:0016021]; lamellipodium [GO:0030027]; lamellipodium membrane [GO:0031258]; postsynapse [GO:0098794]; ruffle [GO:0001726]; SCAR complex [GO:0031209]
P28661	SEPT4_MOUSE	reviewed	Septin-4 (Brain protein H5) (Peanut-like protein 2)	Septin4 Pnutl2 Sept4	Mus musculus (Mouse)	478	axon [GO:0030424]; cell division site [GO:0032153]; cell projection [GO:0042995]; cytoplasm [GO:0005737]; cytosol [GO:0005829]; dendrite [GO:0030425]; microtubule cytoskeleton [GO:0015630]; mitochondrion [GO:0005739]; motile cilium [GO:0031514]; myelin sheath [GO:0043209]; nucleoplasm [GO:0005654]; perikaryon [GO:0043204]; septin complex [GO:0031105]; septin ring [GO:0005940]; sperm annulus [GO:0…
P28663	SNAB_MOUSE	reviewed	Beta-soluble NSF attachment protein (SNAP-beta) (Brain protein I47) (N-ethylmaleimide-sensitive factor attachment protein beta)	Napb Snapb	Mus musculus (Mouse)	298	glutamatergic synapse [GO:0098978]; myelin sheath [GO:0043209]; postsynapse [GO:0098794]; presynapse [GO:0098793]; SNARE complex [GO:0031201]; synaptobrevin 2-SNAP-25-syntaxin-1a complex [GO:0070044]; vacuolar membrane [GO:0005774]
P28667	MRP_MOUSE	reviewed	MARCKS-related protein (Brain protein F52) (MARCKS-like protein 1) (Macrophage myristoylated alanine-rich C kinase substrate) (Mac-MARCKS) (MacMARCKS)	Marcksl1 Mlp Mrp	Mus musculus (Mouse)	200	anchored component of presynaptic membrane [GO:0099026]; cytoplasm [GO:0005737]; cytoskeleton [GO:0005856]; plasma membrane [GO:0005886]; presynaptic cytosol [GO:0099523]; synaptic vesicle [GO:0008021]
P28738	KIF5C_MOUSE	reviewed	Kinesin heavy chain isoform 5C (Kinesin heavy chain neuron-specific 2)	Kif5c Nkhc2	Mus musculus (Mouse)	956	axonal growth cone [GO:0044295]; axon cytoplasm [GO:1904115]; ciliary rootlet [GO:0035253]; cytoplasm [GO:0005737]; dendrite [GO:0030425]; dendrite cytoplasm [GO:0032839]; distal axon [GO:0150034]; kinesin complex [GO:0005871]; microtubule [GO:0005874]; neuronal cell body [GO:0043025]; neuron projection [GO:0043005]
P28740	KIF2A_MOUSE	reviewed	Kinesin-like protein KIF2A (Kinesin-2)	Kif2a Kif2 Kns2	Mus musculus (Mouse)	705	centriolar subdistal appendage [GO:0120103]; centriole [GO:0005814]; centrosome [GO:0005813]; cytoplasm [GO:0005737]; kinesin complex [GO:0005871]; lysosome [GO:0005764]; microtubule [GO:0005874]; nuclear body [GO:0016604]; nucleolus [GO:0005730]; nucleoplasm [GO:0005654]; sperm principal piece [GO:0097228]; spindle [GO:0005819]; spindle pole [GO:0000922]
P28741	KIF3A_MOUSE	reviewed	Kinesin-like protein KIF3A (Microtubule plus end-directed kinesin motor 3A)	Kif3a Kif3	Mus musculus (Mouse)	701	axon cytoplasm [GO:1904115]; axoneme [GO:0005930]; centriole [GO:0005814]; centrosome [GO:0005813]; cilium [GO:0005929]; cytosol [GO:0005829]; kinesin complex [GO:0005871]; kinesin II complex [GO:0016939]; microtubule [GO:0005874]; microtubule cytoskeleton [GO:0015630]; motile cilium [GO:0031514]; neuronal cell body [GO:0043025]; neuron projection [GO:0043005]; photoreceptor connecting cilium [GO…
P28867	KPCD_MOUSE	reviewed	Protein kinase C delta type (EC 2.7.11.13) (Tyrosine-protein kinase PRKCD) (EC 2.7.10.2) (nPKC-delta) [Cleaved into: Protein kinase C delta type regulatory subunit; Protein kinase C delta type catalytic subunit (Sphingosine-dependent protein kinase-1) (SDK1)]	Prkcd Pkcd	Mus musculus (Mouse)	674	cell-cell junction [GO:0005911]; cytoplasm [GO:0005737]; cytosol [GO:0005829]; endolysosome [GO:0036019]; endoplasmic reticulum [GO:0005783]; membrane [GO:0016020]; mitochondrion [GO:0005739]; nuclear matrix [GO:0016363]; nucleus [GO:0005634]; perinuclear region of cytoplasm [GO:0048471]; plasma membrane [GO:0005886]; postsynaptic cytosol [GO:0099524]
P29341	PABP1_MOUSE	reviewed	Polyadenylate-binding protein 1 (PABP-1) (Poly(A)-binding protein 1)	Pabpc1 Pabp1	Mus musculus (Mouse)	636	catalytic step 2 spliceosome [GO:0071013]; cell leading edge [GO:0031252]; cytoplasm [GO:0005737]; cytoplasmic ribonucleoprotein granule [GO:0036464]; cytoplasmic stress granule [GO:0010494]; cytosol [GO:0005829]; dendrite [GO:0030425]; lamellipodium [GO:0030027]; messenger ribonucleoprotein complex [GO:1990124]; nucleus [GO:0005634]; ribonucleoprotein complex [GO:1990904]; synapse [GO:0045202]
P30275	KCRU_MOUSE	reviewed	Creatine kinase U-type, mitochondrial (EC 2.7.3.2) (Acidic-type mitochondrial creatine kinase) (Mia-CK) (Ubiquitous mitochondrial creatine kinase) (U-MtCK)	Ckmt1	Mus musculus (Mouse)	418	mitochondrial inner membrane [GO:0005743]; mitochondrial inner-outer membrane contact site [GO:0044289]; mitochondrion [GO:0005739]; myelin sheath [GO:0043209]; perikaryon [GO:0043204]
P30416	FKBP4_MOUSE	reviewed	Peptidyl-prolyl cis-trans isomerase FKBP4 (PPIase FKBP4) (EC 5.2.1.8) (52 kDa FK506-binding protein) (52 kDa FKBP) (FKBP-52) (59 kDa immunophilin) (p59) (FK506-binding protein 4) (FKBP-4) (FKBP59) (HSP-binding immunophilin) (HBI) (Immunophilin FKBP52) (Rotamase) [Cleaved into: Peptidyl-prolyl cis-trans isomerase FKBP4, N-terminally processed]	Fkbp4 Fkpb52	Mus musculus (Mouse)	458	axonal growth cone [GO:0044295]; cytoplasm [GO:0005737]; cytosol [GO:0005829]; microtubule [GO:0005874]; mitochondrion [GO:0005739]; neuronal cell body [GO:0043025]; neuron projection [GO:0043005]; nucleoplasm [GO:0005654]; nucleus [GO:0005634]; perinuclear region of cytoplasm [GO:0048471]; protein-containing complex [GO:0032991]
P30999	CTND1_MOUSE	reviewed	Catenin delta-1 (Cadherin-associated Src substrate) (CAS) (p120 catenin) (p120(ctn)) (p120(cas))	Ctnnd1 Catns Kiaa0384	Mus musculus (Mouse)	938	adherens junction [GO:0005912]; apicolateral plasma membrane [GO:0016327]; bicellular tight junction [GO:0005923]; catenin complex [GO:0016342]; cell-cell junction [GO:0005911]; cytoplasm [GO:0005737]; cytosol [GO:0005829]; dendritic spine [GO:0043197]; flotillin complex [GO:0016600]; glutamatergic synapse [GO:0098978]; growth cone [GO:0030426]; hippocampal mossy fiber to CA3 synapse [GO:0098686]…
P31230	AIMP1_MOUSE	reviewed	Aminoacyl tRNA synthase complex-interacting multifunctional protein 1 (Multisynthase complex auxiliary component p43) [Cleaved into: Endothelial monocyte-activating polypeptide 2 (EMAP-2) (Endothelial monocyte-activating polypeptide II) (EMAP-II) (Small inducible cytokine subfamily E member 1)]	Aimp1 Emap2 Scye1	Mus musculus (Mouse)	310	aminoacyl-tRNA synthetase multienzyme complex [GO:0017101]; cell surface [GO:0009986]; cytosol [GO:0005829]; endoplasmic reticulum [GO:0005783]; extracellular space [GO:0005615]; Golgi apparatus [GO:0005794]; nucleus [GO:0005634]
P31324	KAP3_MOUSE	reviewed	cAMP-dependent protein kinase type II-beta regulatory subunit	Prkar2b	Mus musculus (Mouse)	416	cAMP-dependent protein kinase complex [GO:0005952]; centrosome [GO:0005813]; ciliary base [GO:0097546]; cytoplasm [GO:0005737]; dendrite [GO:0030425]; dendritic shaft [GO:0043198]; dendritic spine [GO:0043197]; glutamatergic synapse [GO:0098978]; membrane raft [GO:0045121]; neuronal cell body [GO:0043025]; perinuclear region of cytoplasm [GO:0048471]; plasma membrane [GO:0005886]; postsynapse [GO…
P31648	SC6A1_MOUSE	reviewed	Sodium- and chloride-dependent GABA transporter 1 (GAT-1) (Solute carrier family 6 member 1)	Slc6a1 Gabt1 Gat-1 Gat1	Mus musculus (Mouse)	599	axon [GO:0030424]; cell surface [GO:0009986]; GABA-ergic synapse [GO:0098982]; integral component of plasma membrane [GO:0005887]; integral component of postsynaptic membrane [GO:0099055]; integral component of presynaptic membrane [GO:0099056]; neuronal cell body [GO:0043025]; neuron projection [GO:0043005]; plasma membrane [GO:0005886]
P31650	S6A11_MOUSE	reviewed	Sodium- and chloride-dependent GABA transporter 3 (GAT-3) (Sodium- and chloride-dependent GABA transporter 4) (GAT-4) (Solute carrier family 6 member 11)	Slc6a11 Gabt3 Gabt4 Gat-4 Gat3 Gat4	Mus musculus (Mouse)	627	cell projection [GO:0042995]; cytoplasm [GO:0005737]; GABA-ergic synapse [GO:0098982]; integral component of plasma membrane [GO:0005887]; integral component of postsynaptic membrane [GO:0099055]; integral component of presynaptic membrane [GO:0099056]; membrane [GO:0016020]; neuron projection [GO:0043005]; synapse [GO:0045202]
P31938	MP2K1_MOUSE	reviewed	Dual specificity mitogen-activated protein kinase kinase 1 (MAP kinase kinase 1) (MAPKK 1) (EC 2.7.12.2) (ERK activator kinase 1) (MAPK/ERK kinase 1) (MEK 1)	Map2k1 Mek1 Prkmk1	Mus musculus (Mouse)	393	axon [GO:0030424]; cell cortex [GO:0005938]; cytosol [GO:0005829]; dendrite [GO:0030425]; dendrite cytoplasm [GO:0032839]; early endosome [GO:0005769]; endoplasmic reticulum [GO:0005783]; focal adhesion [GO:0005925]; glutamatergic synapse [GO:0098978]; Golgi apparatus [GO:0005794]; late endosome [GO:0005770]; microtubule organizing center [GO:0005815]; mitochondrion [GO:0005739]; nucleus [GO:0005…
P32020	SCP2_MOUSE	reviewed	Sterol carrier protein 2 (SCP-2) (Acetyl-CoA C-myristoyltransferase) (EC 2.3.1.155) (Non-specific lipid-transfer protein) (NSL-TP) (Propanoyl-CoA C-acyltransferase) (EC 2.3.1.176) (SCP-2/3-oxoacyl-CoA thiolase) (SCP-2/thiolase) (EC 2.3.1.16) (SCP-chi) (Sterol carrier protein X) (SCP-X) (Straight-chain acyl-CoA oxidase) (SCPX)	Scp2 Scp-2	Mus musculus (Mouse)	547	cytoplasm [GO:0005737]; cytosol [GO:0005829]; endoplasmic reticulum [GO:0005783]; extrinsic component of membrane [GO:0019898]; extrinsic component of mitochondrial outer membrane [GO:0031315]; intracellular membrane-bounded organelle [GO:0043231]; membrane [GO:0016020]; mitochondrion [GO:0005739]; nucleoplasm [GO:0005654]; nucleus [GO:0005634]; peroxisomal matrix [GO:0005782]; peroxisome [GO:000…
P32037	GTR3_MOUSE	reviewed	Solute carrier family 2, facilitated glucose transporter member 3 (Glucose transporter type 3, brain) (GLUT-3)	Slc2a3 Glut3	Mus musculus (Mouse)	493	acrosomal membrane [GO:0002080]; caveola [GO:0005901]; cell projection [GO:0042995]; cytoplasm [GO:0005737]; glutamatergic synapse [GO:0098978]; integral component of membrane [GO:0016021]; integral component of plasma membrane [GO:0005887]; integral component of synaptic membrane [GO:0099699]; perikaryon [GO:0043204]; plasma membrane [GO:0005886]; synaptic vesicle membrane [GO:0030672]
P32067	LA_MOUSE	reviewed	Lupus La protein homolog (La autoantigen homolog) (La ribonucleoprotein)	Ssb Ss-b	Mus musculus (Mouse)	415	cytoplasm [GO:0005737]; nucleus [GO:0005634]; ribonucleoprotein complex [GO:1990904]
P32883	RASK_MOUSE	reviewed	GTPase KRas (EC 3.6.5.2) (K-Ras 2) (Ki-Ras) (c-K-ras) (c-Ki-ras) [Cleaved into: GTPase KRas, N-terminally processed]	Kras Kras2	Mus musculus (Mouse)	189	cytoplasm [GO:0005737]; extrinsic component of cytoplasmic side of plasma membrane [GO:0031234]; membrane [GO:0016020]; membrane raft [GO:0045121]; mitochondrion [GO:0005739]; plasma membrane [GO:0005886]
P32921	SYWC_MOUSE	reviewed	Tryptophan--tRNA ligase, cytoplasmic (EC 6.1.1.2) (Tryptophanyl-tRNA synthetase) (TrpRS) [Cleaved into: T1-TrpRS; T2-TrpRS]	Wars1 Wars Wrs	Mus musculus (Mouse)	481	cytoplasm [GO:0005737]; cytosol [GO:0005829]; nucleus [GO:0005634]; protein-containing complex [GO:0032991]
P33173	KIF1A_MOUSE	reviewed	Kinesin-like protein KIF1A (Axonal transporter of synaptic vesicles)	Kif1a Atsv Kif1	Mus musculus (Mouse)	1695	axon [GO:0030424]; axon cytoplasm [GO:1904115]; cytosol [GO:0005829]; dendrite [GO:0030425]; extrinsic component of neuronal dense core vesicle membrane [GO:0098674]; kinesin complex [GO:0005871]; microtubule [GO:0005874]; neuronal cell body [GO:0043025]; neuronal dense core vesicle [GO:0098992]; neuron projection [GO:0043005]; perinuclear region of cytoplasm [GO:0048471]; postsynapse [GO:0098794…
P33175	KIF5A_MOUSE	reviewed	Kinesin heavy chain isoform 5A (Kinesin heavy chain neuron-specific 1) (Neuronal kinesin heavy chain) (NKHC)	Kif5a Kiaa4086 Kif5 Nkhc1	Mus musculus (Mouse)	1027	apical dendrite [GO:0097440]; axon [GO:0030424]; axon cytoplasm [GO:1904115]; central region of growth cone [GO:0090724]; ciliary rootlet [GO:0035253]; cytoplasm [GO:0005737]; cytosol [GO:0005829]; dendrite [GO:0030425]; dendrite cytoplasm [GO:0032839]; kinesin complex [GO:0005871]; microtubule [GO:0005874]; neuronal cell body [GO:0043025]; neuron projection [GO:0043005]; P-body [GO:0000932]; per…
P34022	RANG_MOUSE	reviewed	Ran-specific GTPase-activating protein (HpaII tiny fragments locus 9a protein) (Ran-binding protein 1) (RANBP1)	Ranbp1 Htf9-a Htf9a	Mus musculus (Mouse)	203	axon cytoplasm [GO:1904115]; centrosome [GO:0005813]; cytoplasm [GO:0005737]; cytosol [GO:0005829]; nuclear pore [GO:0005643]; nucleus [GO:0005634]; plasma membrane bounded cell projection cytoplasm [GO:0032838]
P34152	FAK1_MOUSE	reviewed	Focal adhesion kinase 1 (FADK 1) (EC 2.7.10.2) (Focal adhesion kinase-related nonkinase) (FRNK) (Protein-tyrosine kinase 2) (p125FAK) (pp125FAK)	Ptk2 Fadk Fak Fak1 Kiaa4203	Mus musculus (Mouse)	1052	apical plasma membrane [GO:0016324]; basolateral plasma membrane [GO:0016323]; ciliary basal body [GO:0036064]; cytoplasm [GO:0005737]; cytosol [GO:0005829]; dendritic spine [GO:0043197]; extrinsic component of cytoplasmic side of plasma membrane [GO:0031234]; focal adhesion [GO:0005925]; glutamatergic synapse [GO:0098978]; intercalated disc [GO:0014704]; intracellular membrane-bounded organelle …
P34884	MIF_MOUSE	reviewed	Macrophage migration inhibitory factor (MIF) (EC 5.3.2.1) (Delayed early response protein 6) (DER6) (Glycosylation-inhibiting factor) (GIF) (L-dopachrome isomerase) (L-dopachrome tautomerase) (EC 5.3.3.12) (Phenylpyruvate tautomerase)	Mif	Mus musculus (Mouse)	115	cell surface [GO:0009986]; cytoplasm [GO:0005737]; cytosol [GO:0005829]; extracellular region [GO:0005576]; extracellular space [GO:0005615]; myelin sheath [GO:0043209]; nucleoplasm [GO:0005654]; nucleus [GO:0005634]; plasma membrane [GO:0005886]
P34914	HYES_MOUSE	reviewed	Bifunctional epoxide hydrolase 2 [Includes: Cytosolic epoxide hydrolase 2 (CEH) (EC 3.3.2.10) (Epoxide hydratase) (Soluble epoxide hydrolase) (SEH); Lipid-phosphate phosphatase (EC 3.1.3.76)]	Ephx2 Eph2	Mus musculus (Mouse)	554	cytosol [GO:0005829]; peroxisome [GO:0005777]
P35123	UBP4_MOUSE	reviewed	Ubiquitin carboxyl-terminal hydrolase 4 (EC 3.4.19.12) (Deubiquitinating enzyme 4) (Ubiquitin thioesterase 4) (Ubiquitin-specific-processing protease 4) (Ubiquitous nuclear protein)	Usp4 Unp	Mus musculus (Mouse)	962	cytoplasm [GO:0005737]; cytosol [GO:0005829]; nucleus [GO:0005634]; plasma membrane [GO:0005886]
P35235	PTN11_MOUSE	reviewed	Tyrosine-protein phosphatase non-receptor type 11 (EC 3.1.3.48) (Protein-tyrosine phosphatase SYP) (SH-PTP2) (SHP-2) (Shp2)	Ptpn11	Mus musculus (Mouse)	593	cytoplasm [GO:0005737]; cytosol [GO:0005829]; mitochondrion [GO:0005739]; nucleus [GO:0005634]; plasma membrane [GO:0005886]; plasma membrane raft [GO:0044853]; protein-containing complex [GO:0032991]
P35278	RAB5C_MOUSE	reviewed	Ras-related protein Rab-5C (EC 3.6.5.2)	Rab5c	Mus musculus (Mouse)	216	anchored component of synaptic vesicle membrane [GO:0098993]; early endosome [GO:0005769]; early endosome membrane [GO:0031901]; endocytic vesicle [GO:0030139]; endomembrane system [GO:0012505]; endosome [GO:0005768]; lipid droplet [GO:0005811]; melanosome [GO:0042470]; plasma membrane [GO:0005886]
P35279	RAB6A_MOUSE	reviewed	Ras-related protein Rab-6A (Rab-6)	Rab6a Rab6 MNCb-1660	Mus musculus (Mouse)	208	cytoplasmic vesicle [GO:0031410]; cytosol [GO:0005829]; endomembrane system [GO:0012505]; endosome to plasma membrane transport vesicle [GO:0070381]; Golgi apparatus [GO:0005794]; Golgi membrane [GO:0000139]; membrane [GO:0016020]; presynapse [GO:0098793]; trans-Golgi network [GO:0005802]
P35282	RAB21_MOUSE	reviewed	Ras-related protein Rab-21 (Rab-12)	Rab21	Mus musculus (Mouse)	222	axon cytoplasm [GO:1904115]; cleavage furrow [GO:0032154]; cytoplasmic side of early endosome membrane [GO:0098559]; cytoplasmic side of plasma membrane [GO:0009898]; early endosome [GO:0005769]; endomembrane system [GO:0012505]; endoplasmic reticulum membrane [GO:0005789]; endosome [GO:0005768]; Golgi cisterna membrane [GO:0032580]; neuron projection [GO:0043005]; synapse [GO:0045202]; trans-Gol…
P35283	RAB12_MOUSE	reviewed	Ras-related protein Rab-12 (Rab-13)	Rab12	Mus musculus (Mouse)	243	autophagosome [GO:0005776]; endosome [GO:0005768]; Golgi apparatus [GO:0005794]; Golgi membrane [GO:0000139]; insulin-responsive compartment [GO:0032593]; lysosomal membrane [GO:0005765]; lysosome [GO:0005764]; phagocytic vesicle [GO:0045335]; plasma membrane [GO:0005886]; recycling endosome [GO:0055037]; recycling endosome membrane [GO:0055038]; secretory granule [GO:0030141]; synaptic vesicle […
P35288	RAB23_MOUSE	reviewed	Ras-related protein Rab-23 (Protein open brain) (Rab-15)	Rab23 Opb	Mus musculus (Mouse)	237	autophagosome [GO:0005776]; cell junction [GO:0030054]; centrosome [GO:0005813]; cytoplasm [GO:0005737]; cytosol [GO:0005829]; endomembrane system [GO:0012505]; endosome membrane [GO:0010008]; phagocytic vesicle [GO:0045335]; phagocytic vesicle membrane [GO:0030670]; plasma membrane [GO:0005886]
P35293	RAB18_MOUSE	reviewed	Ras-related protein Rab-18	Rab18	Mus musculus (Mouse)	206	apical plasma membrane [GO:0016324]; endomembrane system [GO:0012505]; endoplasmic reticulum tubular network [GO:0071782]; Golgi apparatus [GO:0005794]; lipid droplet [GO:0005811]; synapse [GO:0045202]
P35438	NMDZ1_MOUSE	reviewed	Glutamate receptor ionotropic, NMDA 1 (GluN1) (Glutamate [NMDA] receptor subunit zeta-1) (N-methyl-D-aspartate receptor subunit NR1) (NMD-R1)	Grin1 Glurz1	Mus musculus (Mouse)	938	cell surface [GO:0009986]; cytoplasm [GO:0005737]; dendrite [GO:0030425]; dendrite membrane [GO:0032590]; dendritic branch [GO:0044307]; dendritic spine [GO:0043197]; endoplasmic reticulum [GO:0005783]; endoplasmic reticulum membrane [GO:0005789]; excitatory synapse [GO:0060076]; glutamatergic synapse [GO:0098978]; growth cone [GO:0030426]; hippocampal mossy fiber to CA3 synapse [GO:0098686]; int…
P35486	ODPA_MOUSE	reviewed	Pyruvate dehydrogenase E1 component subunit alpha, somatic form, mitochondrial (EC 1.2.4.1) (PDHE1-A type I)	Pdha1 Pdha-1	Mus musculus (Mouse)	390	mitochondrial matrix [GO:0005759]; mitochondrion [GO:0005739]; myelin sheath [GO:0043209]; nucleolus [GO:0005730]; pyruvate dehydrogenase complex [GO:0045254]
P35550	FBRL_MOUSE	reviewed	rRNA 2'-O-methyltransferase fibrillarin (EC 2.1.1.-) (Histone-glutamine methyltransferase) (Nucleolar protein 1) (U6 snRNA 2'-O-methyltransferase fibrillarin)	Fbl	Mus musculus (Mouse)	327	box C/D RNP complex [GO:0031428]; Cajal body [GO:0015030]; chromosome [GO:0005694]; dense fibrillar component [GO:0001651]; fibrillar center [GO:0001650]; granular component [GO:0001652]; nucleolus [GO:0005730]; nucleoplasm [GO:0005654]; nucleus [GO:0005634]; small-subunit processome [GO:0032040]
P35564	CALX_MOUSE	reviewed	Calnexin	Canx	Mus musculus (Mouse)	591	axon [GO:0030424]; cytoplasm [GO:0005737]; dendrite cytoplasm [GO:0032839]; dendritic spine [GO:0043197]; endoplasmic reticulum [GO:0005783]; endoplasmic reticulum membrane [GO:0005789]; endoplasmic reticulum quality control compartment [GO:0044322]; glutamatergic synapse [GO:0098978]; integral component of lumenal side of endoplasmic reticulum membrane [GO:0071556]; integral component of membran…
P35585	AP1M1_MOUSE	reviewed	AP-1 complex subunit mu-1 (AP-mu chain family member mu1A) (Adaptor protein complex AP-1 subunit mu-1) (Adaptor-related protein complex 1 subunit mu-1) (Clathrin assembly protein complex 1 mu-1 medium chain 1) (Clathrin coat assembly protein AP47) (Clathrin coat-associated protein AP47) (Golgi adaptor HA1/AP1 adaptin mu-1 subunit) (Mu-adaptin 1) (Mu1A-adaptin)	Ap1m1 Cltnm	Mus musculus (Mouse)	423	clathrin adaptor complex [GO:0030131]; clathrin-coated vesicle [GO:0030136]; clathrin-coated vesicle membrane [GO:0030665]; cytoplasmic vesicle [GO:0031410]; intracellular membrane-bounded organelle [GO:0043231]; trans-Golgi network [GO:0005802]
P35700	PRDX1_MOUSE	reviewed	Peroxiredoxin-1 (EC 1.11.1.24) (Macrophage 23 kDa stress protein) (Osteoblast-specific factor 3) (OSF-3) (Thioredoxin peroxidase 2) (Thioredoxin-dependent peroxide reductase 2) (Thioredoxin-dependent peroxiredoxin 1)	Prdx1 Msp23 Paga Tdpx2	Mus musculus (Mouse)	199	cytoplasm [GO:0005737]; cytosol [GO:0005829]; euchromatin [GO:0000791]; mitochondrial matrix [GO:0005759]; mitochondrion [GO:0005739]; myelin sheath [GO:0043209]; nucleolus [GO:0005730]; nucleus [GO:0005634]; peroxisomal matrix [GO:0005782]
P35762	CD81_MOUSE	reviewed	CD81 antigen (26 kDa cell surface protein TAPA-1) (Target of the antiproliferative antibody 1) (CD antigen CD81)	Cd81 Tapa1	Mus musculus (Mouse)	236	apical plasma membrane [GO:0016324]; basal plasma membrane [GO:0009925]; basolateral plasma membrane [GO:0016323]; extracellular exosome [GO:0070062]; immunological synapse [GO:0001772]; integral component of membrane [GO:0016021]; integral component of plasma membrane [GO:0005887]; membrane [GO:0016020]; plasma membrane [GO:0005886]; tetraspanin-enriched microdomain [GO:0097197]; vesicle [GO:003…
P35802	GPM6A_MOUSE	reviewed	Neuronal membrane glycoprotein M6-a (M6a)	Gpm6a M6a	Mus musculus (Mouse)	278	axonal growth cone [GO:0044295]; dendritic spine [GO:0043197]; filopodium [GO:0030175]; glutamatergic synapse [GO:0098978]; integral component of presynaptic active zone membrane [GO:0099059]; neuronal cell body [GO:0043025]; neuron projection [GO:0043005]; plasma membrane [GO:0005886]
P35803	GPM6B_MOUSE	reviewed	Neuronal membrane glycoprotein M6-b (M6b)	Gpm6b M6b	Mus musculus (Mouse)	328	integral component of membrane [GO:0016021]; membrane raft [GO:0045121]; plasma membrane [GO:0005886]
P35831	PTN12_MOUSE	reviewed	Tyrosine-protein phosphatase non-receptor type 12 (EC 3.1.3.48) (MPTP-PEST) (Protein-tyrosine phosphatase P19) (P19-PTP)	Ptpn12	Mus musculus (Mouse)	775	cell projection [GO:0042995]; cytoplasm [GO:0005737]; cytosol [GO:0005829]; focal adhesion [GO:0005925]; nucleus [GO:0005634]; podosome [GO:0002102]
P35922	FMR1_MOUSE	reviewed	Synaptic functional regulator FMR1 (Fragile X mental retardation protein 1 homolog) (FMRP) (Protein FMR-1) (mFmr1p)	Fmr1 Fmr-1	Mus musculus (Mouse)	614	axon [GO:0030424]; axon cytoplasm [GO:1904115]; axon terminus [GO:0043679]; Cajal body [GO:0015030]; cell body [GO:0044297]; cell projection [GO:0042995]; chromocenter [GO:0010369]; chromosome [GO:0005694]; chromosome, centromeric region [GO:0000775]; cytoplasm [GO:0005737]; cytoplasmic ribonucleoprotein granule [GO:0036464]; cytoplasmic stress granule [GO:0010494]; cytosol [GO:0005829]; dendrite…
P35979	RL12_MOUSE	reviewed	60S ribosomal protein L12	Rpl12	Mus musculus (Mouse)	165	cytoplasm [GO:0005737]; cytosol [GO:0005829]; cytosolic large ribosomal subunit [GO:0022625]; cytosolic ribosome [GO:0022626]; large ribosomal subunit [GO:0015934]; nucleolus [GO:0005730]; nucleus [GO:0005634]; postsynaptic density [GO:0014069]
P35980	RL18_MOUSE	reviewed	60S ribosomal protein L18	Rpl18	Mus musculus (Mouse)	188	cytosol [GO:0005829]; cytosolic large ribosomal subunit [GO:0022625]; cytosolic ribosome [GO:0022626]; endoplasmic reticulum [GO:0005783]; nucleolus [GO:0005730]; polysomal ribosome [GO:0042788]; rough endoplasmic reticulum [GO:0005791]; synapse [GO:0045202]
P36536	SAR1A_MOUSE	reviewed	GTP-binding protein SAR1a	Sar1a Sara Sara1	Mus musculus (Mouse)	198	COPII vesicle coat [GO:0030127]; endoplasmic reticulum [GO:0005783]; endoplasmic reticulum exit site [GO:0070971]; Golgi apparatus [GO:0005794]; sarcoplasmic reticulum [GO:0016529]
P36916	GNL1_MOUSE	reviewed	Guanine nucleotide-binding protein-like 1 (GTP-binding protein MMR1)	Gnl1 Gna-rs1 Mmr1	Mus musculus (Mouse)	607
P36993	PPM1B_MOUSE	reviewed	Protein phosphatase 1B (EC 3.1.3.16) (Protein phosphatase 2C isoform beta) (PP2C-beta)	Ppm1b Pp2c2 Pppm1b	Mus musculus (Mouse)	390	cytosol [GO:0005829]; membrane [GO:0016020]; nucleolus [GO:0005730]; nucleus [GO:0005634]
P37040	NCPR_MOUSE	reviewed	NADPH--cytochrome P450 reductase (CPR) (P450R) (EC 1.6.2.4)	Por	Mus musculus (Mouse)	678	cytosol [GO:0005829]; endoplasmic reticulum membrane [GO:0005789]; integral component of membrane [GO:0016021]; intracellular membrane-bounded organelle [GO:0043231]; membrane [GO:0016020]; mitochondrion [GO:0005739]
P38647	GRP75_MOUSE	reviewed	Stress-70 protein, mitochondrial (75 kDa glucose-regulated protein) (GRP-75) (Heat shock 70 kDa protein 9) (Mortalin) (Peptide-binding protein 74) (PBP74) (p66 MOT)	Hspa9 Grp75 Hsp74 Hspa9a	Mus musculus (Mouse)	679	cytoplasm [GO:0005737]; mitochondrial matrix [GO:0005759]; mitochondrial nucleoid [GO:0042645]; mitochondrion [GO:0005739]; myelin sheath [GO:0043209]; nucleolus [GO:0005730]
P39053	DYN1_MOUSE	reviewed	Dynamin-1 (EC 3.6.5.5)	Dnm1 Dnm Kiaa4093	Mus musculus (Mouse)	867	axon [GO:0030424]; cytoplasm [GO:0005737]; cytoplasmic vesicle [GO:0031410]; dendritic spine head [GO:0044327]; glutamatergic synapse [GO:0098978]; Golgi apparatus [GO:0005794]; membrane [GO:0016020]; membrane coat [GO:0030117]; microtubule [GO:0005874]; microtubule cytoskeleton [GO:0015630]; mitochondrial membrane [GO:0031966]; myelin sheath [GO:0043209]; nucleoplasm [GO:0005654]; photoreceptor …
P39054	DYN2_MOUSE	reviewed	Dynamin-2 (EC 3.6.5.5) (Dynamin UDNM)	Dnm2 Dyn2	Mus musculus (Mouse)	870	axon [GO:0030424]; cell junction [GO:0030054]; centrosome [GO:0005813]; clathrin-coated endocytic vesicle [GO:0045334]; clathrin-coated pit [GO:0005905]; cytoplasm [GO:0005737]; cytoplasmic vesicle [GO:0031410]; cytosol [GO:0005829]; dendritic spine head [GO:0044327]; endosome [GO:0005768]; glutamatergic synapse [GO:0098978]; Golgi apparatus [GO:0005794]; Golgi membrane [GO:0000139]; lamellipodiu…
P39447	ZO1_MOUSE	reviewed	Tight junction protein ZO-1 (Tight junction protein 1) (Zona occludens protein 1) (Zonula occludens protein 1)	Tjp1 Zo1	Mus musculus (Mouse)	1745	adherens junction [GO:0005912]; apical junction complex [GO:0043296]; apical part of cell [GO:0045177]; apical plasma membrane [GO:0016324]; apicolateral plasma membrane [GO:0016327]; basolateral plasma membrane [GO:0016323]; bicellular tight junction [GO:0005923]; cell-cell junction [GO:0005911]; cell junction [GO:0030054]; cell surface [GO:0009986]; cytoplasm [GO:0005737]; cytosol [GO:0005829];…
P39688	FYN_MOUSE	reviewed	Tyrosine-protein kinase Fyn (EC 2.7.10.2) (Proto-oncogene c-Fyn) (p59-Fyn)	Fyn	Mus musculus (Mouse)	537	actin filament [GO:0005884]; cell body [GO:0044297]; cell periphery [GO:0071944]; cytosol [GO:0005829]; dendrite [GO:0030425]; endosome [GO:0005768]; extrinsic component of cytoplasmic side of plasma membrane [GO:0031234]; glial cell projection [GO:0097386]; glutamatergic synapse [GO:0098978]; intracellular membrane-bounded organelle [GO:0043231]; membrane [GO:0016020]; membrane raft [GO:0045121]…
P40124	CAP1_MOUSE	reviewed	Adenylyl cyclase-associated protein 1 (CAP 1)	Cap1 Cap	Mus musculus (Mouse)	474	cortical actin cytoskeleton [GO:0030864]; cytoplasm [GO:0005737]; cytosol [GO:0005829]; extracellular region [GO:0005576]; plasma membrane [GO:0005886]
P40142	TKT_MOUSE	reviewed	Transketolase (TK) (EC 2.2.1.1) (P68)	Tkt	Mus musculus (Mouse)	623	endoplasmic reticulum membrane [GO:0005789]; intracellular membrane-bounded organelle [GO:0043231]; myelin sheath [GO:0043209]; nuclear body [GO:0016604]; nucleoplasm [GO:0005654]; peroxisome [GO:0005777]
P40336	VP26A_MOUSE	reviewed	Vacuolar protein sorting-associated protein 26A (H<beta>58 protein) (H beta 58) (Vesicle protein sorting 26A) (mVPS26)	Vps26a Vps26	Mus musculus (Mouse)	327	cytosol [GO:0005829]; early endosome [GO:0005769]; endosome [GO:0005768]; endosome membrane [GO:0010008]; lysosome [GO:0005764]; retromer, cargo-selective complex [GO:0030906]; retromer complex [GO:0030904]; tubular endosome [GO:0097422]; vesicle [GO:0031982]
P41105	RL28_MOUSE	reviewed	60S ribosomal protein L28	Rpl28	Mus musculus (Mouse)	137	cell body [GO:0044297]; cytoplasmic ribonucleoprotein granule [GO:0036464]; cytosol [GO:0005829]; cytosolic large ribosomal subunit [GO:0022625]; cytosolic ribosome [GO:0022626]; dendrite [GO:0030425]
P41216	ACSL1_MOUSE	reviewed	Long-chain-fatty-acid--CoA ligase 1 (EC 6.2.1.3) (Arachidonate--CoA ligase) (EC 6.2.1.15) (Long-chain acyl-CoA synthetase 1) (LACS 1) (Phytanate--CoA ligase) (EC 6.2.1.24)	Acsl1 Acsl2 Facl2	Mus musculus (Mouse)	699	endoplasmic reticulum [GO:0005783]; endoplasmic reticulum membrane [GO:0005789]; integral component of membrane [GO:0016021]; membrane [GO:0016020]; mitochondrial outer membrane [GO:0005741]; mitochondrion [GO:0005739]; peroxisomal membrane [GO:0005778]; plasma membrane [GO:0005886]
P41241	CSK_MOUSE	reviewed	Tyrosine-protein kinase CSK (EC 2.7.10.2) (C-Src kinase) (Protein-tyrosine kinase MPK-2) (p50CSK)	Csk	Mus musculus (Mouse)	450	cell-cell junction [GO:0005911]; cytoplasm [GO:0005737]; membrane raft [GO:0045121]; plasma membrane [GO:0005886]
P41242	MATK_MOUSE	reviewed	Megakaryocyte-associated tyrosine-protein kinase (EC 2.7.10.2) (Protein kinase NTK) (Tyrosine-protein kinase CTK)	Matk Ctk Ntk	Mus musculus (Mouse)	505	cytoplasm [GO:0005737]; membrane [GO:0016020]
P42125	ECI1_MOUSE	reviewed	Enoyl-CoA delta isomerase 1, mitochondrial (EC 5.3.3.8) (3,2-trans-enoyl-CoA isomerase) (Delta(3),Delta(2)-enoyl-CoA isomerase) (D3,D2-enoyl-CoA isomerase) (Dodecenoyl-CoA isomerase)	Eci1 Dci	Mus musculus (Mouse)	289	mitochondrial inner membrane [GO:0005743]; mitochondrial matrix [GO:0005759]; mitochondrion [GO:0005739]
P42208	SEPT2_MOUSE	reviewed	Septin-2 (Neural precursor cell expressed developmentally down-regulated protein 5) (NEDD-5)	Septin2 Nedd5 Sept2	Mus musculus (Mouse)	361	actin cytoskeleton [GO:0015629]; actomyosin contractile ring [GO:0005826]; axoneme [GO:0005930]; cell cortex [GO:0005938]; cell division site [GO:0032153]; cell projection [GO:0042995]; cell surface [GO:0009986]; ciliary membrane [GO:0060170]; ciliary transition zone [GO:0035869]; cleavage furrow [GO:0032154]; cytoplasm [GO:0005737]; exocyst [GO:0000145]; intercellular bridge [GO:0045171]; kineto…
P42669	PURA_MOUSE	reviewed	Transcriptional activator protein Pur-alpha (Purine-rich single-stranded DNA-binding protein alpha)	Pura	Mus musculus (Mouse)	321	cytoplasm [GO:0005737]; dendrite [GO:0030425]; dendrite cytoplasm [GO:0032839]; glutamatergic synapse [GO:0098978]; neuronal cell body [GO:0043025]; nucleus [GO:0005634]; postsynapse [GO:0098794]; postsynaptic density [GO:0014069]
P42859	HD_MOUSE	reviewed	Huntingtin (Huntington disease protein homolog) (HD protein homolog) [Cleaved into: Huntingtin, myristoylated N-terminal fragment]	Htt Hd Hdh	Mus musculus (Mouse)	3119	autophagosome [GO:0005776]; axon [GO:0030424]; centriole [GO:0005814]; clathrin-coated vesicle [GO:0030136]; cytoplasm [GO:0005737]; cytoplasmic vesicle [GO:0031410]; cytoplasmic vesicle membrane [GO:0030659]; cytosol [GO:0005829]; dendrite [GO:0030425]; early endosome [GO:0005769]; endoplasmic reticulum [GO:0005783]; glutamatergic synapse [GO:0098978]; Golgi apparatus [GO:0005794]; inclusion bod…
P42932	TCPQ_MOUSE	reviewed	T-complex protein 1 subunit theta (TCP-1-theta) (CCT-theta)	Cct8 Cctq	Mus musculus (Mouse)	548	cell body [GO:0044297]; centrosome [GO:0005813]; chaperonin-containing T-complex [GO:0005832]; cilium [GO:0005929]; cytoplasm [GO:0005737]; cytosol [GO:0005829]; intermediate filament cytoskeleton [GO:0045111]; microtubule [GO:0005874]; nucleoplasm [GO:0005654]; zona pellucida receptor complex [GO:0002199]
P43006	EAA2_MOUSE	reviewed	Excitatory amino acid transporter 2 (GLT-1) (Sodium-dependent glutamate/aspartate transporter 2) (Solute carrier family 1 member 2)	Slc1a2 Eaat2 Glt1	Mus musculus (Mouse)	572	astrocyte projection [GO:0097449]; axolemma [GO:0030673]; axon [GO:0030424]; cell body [GO:0044297]; cell surface [GO:0009986]; dendritic shaft [GO:0043198]; dendritic spine [GO:0043197]; glutamatergic synapse [GO:0098978]; integral component of plasma membrane [GO:0005887]; integral component of presynaptic membrane [GO:0099056]; membrane [GO:0016020]; membrane protein complex [GO:0098796]; memb…
P43274	H14_MOUSE	reviewed	Histone H1.4 (H1 VAR.2) (H1e)	H1-4 H1f4 Hist1h1e	Mus musculus (Mouse)	219	nucleosome [GO:0000786]; nucleus [GO:0005634]
P43275	H11_MOUSE	reviewed	Histone H1.1 (H1 VAR.3) (Histone H1a) (H1a)	H1-1 H1a H1f1 Hist1h1a	Mus musculus (Mouse)	213	cell surface [GO:0009986]; nucleosome [GO:0000786]; nucleus [GO:0005634]; vesicle [GO:0031982]
P43276	H15_MOUSE	reviewed	Histone H1.5 (H1 VAR.5) (H1b)	H1-5 H1f5 Hist1h1b	Mus musculus (Mouse)	223	nucleosome [GO:0000786]; nucleus [GO:0005634]
P43277	H13_MOUSE	reviewed	Histone H1.3 (H1 VAR.4) (H1d)	H1-3 H1f3 Hist1h1d	Mus musculus (Mouse)	221	chromatin [GO:0000785]; euchromatin [GO:0000791]; nucleosome [GO:0000786]; nucleus [GO:0005634]
P45376	ALDR_MOUSE	reviewed	Aldo-keto reductase family 1 member B1 (EC 1.1.1.300) (EC 1.1.1.372) (EC 1.1.1.54) (Aldehyde reductase) (Aldo-keto reductase family 1 member B3) (Aldose reductase) (AR) (EC 1.1.1.21)	Akr1b1 Akr1b3 Aldor1 Aldr1 Alr2	Mus musculus (Mouse)	316	cytosol [GO:0005829]; extracellular space [GO:0005615]; mast cell granule [GO:0042629]; nucleoplasm [GO:0005654]; paranodal junction [GO:0033010]; perinuclear region of cytoplasm [GO:0048471]; plasma membrane bounded cell projection cytoplasm [GO:0032838]; Schmidt-Lanterman incisure [GO:0043220]; Schwann cell microvillus [GO:0097454]
P45591	COF2_MOUSE	reviewed	Cofilin-2 (Cofilin, muscle isoform)	Cfl2	Mus musculus (Mouse)	166	actin cytoskeleton [GO:0015629]; cytoplasm [GO:0005737]; I band [GO:0031674]; nuclear matrix [GO:0016363]; Z disc [GO:0030018]
P45952	ACADM_MOUSE	reviewed	Medium-chain specific acyl-CoA dehydrogenase, mitochondrial (MCAD) (EC 1.3.8.7)	Acadm	Mus musculus (Mouse)	421	axon [GO:0030424]; mitochondrial matrix [GO:0005759]; mitochondrial membrane [GO:0031966]; mitochondrion [GO:0005739]
P46061	RAGP1_MOUSE	reviewed	Ran GTPase-activating protein 1 (RanGAP1)	Rangap1 Fug1	Mus musculus (Mouse)	589	aggresome [GO:0016235]; axon cytoplasm [GO:1904115]; cytoplasm [GO:0005737]; cytoplasmic periphery of the nuclear pore complex [GO:1990723]; cytosol [GO:0005829]; dendrite [GO:0030425]; intracellular membrane-bounded organelle [GO:0043231]; kinetochore [GO:0000776]; mitotic spindle [GO:0072686]; nuclear envelope [GO:0005635]; nuclear membrane [GO:0031965]; nuclear pore [GO:0005643]; nuclear pore …
P46096	SYT1_MOUSE	reviewed	Synaptotagmin-1 (Synaptotagmin I) (SytI) (p65)	Syt1	Mus musculus (Mouse)	421	axon [GO:0030424]; chromaffin granule membrane [GO:0042584]; cytoplasm [GO:0005737]; dense core granule [GO:0031045]; excitatory synapse [GO:0060076]; exocytic vesicle [GO:0070382]; glutamatergic synapse [GO:0098978]; Golgi apparatus [GO:0005794]; hippocampal mossy fiber to CA3 synapse [GO:0098686]; integral component of synaptic vesicle membrane [GO:0030285]; intracellular organelle [GO:0043229]…
P46097	SYT2_MOUSE	reviewed	Synaptotagmin-2 (Inositol polyphosphate-binding protein) (IP4-binding protein) (IP4BP) (Synaptotagmin II) (SytII)	Syt2	Mus musculus (Mouse)	422	axon [GO:0030424]; chromaffin granule membrane [GO:0042584]; dense core granule [GO:0031045]; exocytic vesicle [GO:0070382]; integral component of synaptic vesicle membrane [GO:0030285]; neuromuscular junction [GO:0031594]; plasma membrane [GO:0005886]; synaptic vesicle membrane [GO:0030672]
P46460	NSF_MOUSE	reviewed	Vesicle-fusing ATPase (EC 3.6.4.6) (N-ethylmaleimide-sensitive fusion protein) (NEM-sensitive fusion protein) (Suppressor of K(+) transport growth defect 2) (Protein SKD2) (Vesicular-fusion protein NSF)	Nsf Skd2	Mus musculus (Mouse)	744	cytosol [GO:0005829]; dendritic shaft [GO:0043198]; Golgi apparatus [GO:0005794]; Golgi stack [GO:0005795]; myelin sheath [GO:0043209]; plasma membrane [GO:0005886]; postsynaptic density [GO:0014069]
P46471	PRS7_MOUSE	reviewed	26S proteasome regulatory subunit 7 (26S proteasome AAA-ATPase subunit RPT1) (Proteasome 26S subunit ATPase 2) (Protein MSS1)	Psmc2 Mss1	Mus musculus (Mouse)	433	cytoplasmic ribonucleoprotein granule [GO:0036464]; cytosol [GO:0005829]; dendritic spine [GO:0043197]; nucleus [GO:0005634]; P-body [GO:0000932]; proteasome accessory complex [GO:0022624]; proteasome complex [GO:0000502]; proteasome regulatory particle, base subcomplex [GO:0008540]
P46638	RB11B_MOUSE	reviewed	Ras-related protein Rab-11B (EC 3.6.5.2)	Rab11b	Mus musculus (Mouse)	218	anchored component of synaptic vesicle membrane [GO:0098993]; cytoplasm [GO:0005737]; cytoplasmic vesicle [GO:0031410]; endosome [GO:0005768]; mitochondrion [GO:0005739]; phagocytic vesicle [GO:0045335]; phagocytic vesicle membrane [GO:0030670]; recycling endosome [GO:0055037]; recycling endosome membrane [GO:0055038]; synaptic vesicle [GO:0008021]
P46660	AINX_MOUSE	reviewed	Alpha-internexin (Alpha-Inx) (66 kDa neurofilament protein) (NF-66) (Neurofilament-66)	Ina	Mus musculus (Mouse)	501	cytoplasmic ribonucleoprotein granule [GO:0036464]; glutamatergic synapse [GO:0098978]; myelin sheath [GO:0043209]; neurofilament [GO:0005883]; postsynapse [GO:0098794]; postsynaptic intermediate filament cytoskeleton [GO:0099160]; Schaffer collateral - CA1 synapse [GO:0098685]
P46664	PURA2_MOUSE	reviewed	Adenylosuccinate synthetase isozyme 2 (AMPSase 2) (AdSS 2) (EC 6.3.4.4) (Adenylosuccinate synthetase, acidic isozyme) (Adenylosuccinate synthetase, liver isozyme) (L-type adenylosuccinate synthetase) (IMP--aspartate ligase 2)	Adss2 Adss	Mus musculus (Mouse)	456	cytoplasm [GO:0005737]; cytosol [GO:0005829]; mitochondrion [GO:0005739]
P46735	MYO1B_MOUSE	reviewed	Unconventional myosin-Ib (MIH-L) (Myosin I alpha) (MMI-alpha) (MMIa)	Myo1b	Mus musculus (Mouse)	1107	actin cytoskeleton [GO:0015629]; actin filament [GO:0005884]; apical part of cell [GO:0045177]; brush border [GO:0005903]; cell periphery [GO:0071944]; cytoplasm [GO:0005737]; early endosome [GO:0005769]; endosome membrane [GO:0010008]; filopodium [GO:0030175]; microvillus [GO:0005902]; myosin complex [GO:0016459]; perinuclear region of cytoplasm [GO:0048471]; plasma membrane [GO:0005886]; vesicl…
P46935	NEDD4_MOUSE	reviewed	E3 ubiquitin-protein ligase NEDD4 (EC 2.3.2.26) (HECT-type E3 ubiquitin transferase NEDD4) (Neural precursor cell expressed developmentally down-regulated protein 4) (NEDD-4)	Nedd4 Kiaa0093 Nedd-4 Nedd4-1 Nedd4a	Mus musculus (Mouse)	887	cytoplasm [GO:0005737]; cytosol [GO:0005829]; dendritic spine [GO:0043197]; glutamatergic synapse [GO:0098978]; membrane [GO:0016020]; membrane raft [GO:0045121]; microvillus [GO:0005902]; plasma membrane [GO:0005886]; postsynaptic cytosol [GO:0099524]; ubiquitin ligase complex [GO:0000151]
P46978	STT3A_MOUSE	reviewed	Dolichyl-diphosphooligosaccharide--protein glycosyltransferase subunit STT3A (Oligosaccharyl transferase subunit STT3A) (STT3-A) (EC 2.4.99.18) (B5) (Integral membrane protein 1)	Stt3a Itm1	Mus musculus (Mouse)	705	integral component of membrane [GO:0016021]; membrane [GO:0016020]; oligosaccharyltransferase complex [GO:0008250]; oligosaccharyltransferase III complex [GO:0035000]
P47708	RP3A_MOUSE	reviewed	Rabphilin-3A (Exophilin-1)	Rph3a	Mus musculus (Mouse)	681	cholinergic synapse [GO:0098981]; cytosol [GO:0005829]; dendritic spine [GO:0043197]; extrinsic component of membrane [GO:0019898]; extrinsic component of synaptic vesicle membrane [GO:0098850]; neuromuscular junction [GO:0031594]; neuron projection [GO:0043005]; postsynaptic membrane [GO:0045211]; protein-containing complex [GO:0032991]; secretory granule [GO:0030141]; synapse [GO:0045202]; syna…
P47738	ALDH2_MOUSE	reviewed	Aldehyde dehydrogenase, mitochondrial (EC 1.2.1.3) (AHD-M1) (ALDH class 2) (ALDH-E2) (ALDHI)	Aldh2 Ahd-1 Ahd1	Mus musculus (Mouse)	519	mitochondrial matrix [GO:0005759]; mitochondrion [GO:0005739]
P47740	AL3A2_MOUSE	reviewed	Aldehyde dehydrogenase family 3 member A2 (EC 1.2.1.3) (EC 1.2.1.94) (Aldehyde dehydrogenase 3) (Fatty aldehyde dehydrogenase)	Aldh3a2 Ahd-3 Ahd3 Aldh3 Aldh4	Mus musculus (Mouse)	484	cytosol [GO:0005829]; endoplasmic reticulum [GO:0005783]; extrinsic component of endoplasmic reticulum membrane [GO:0042406]; integral component of membrane [GO:0016021]; intracellular membrane-bounded organelle [GO:0043231]; mitochondrial inner membrane [GO:0005743]; mitochondrion [GO:0005739]; nucleus [GO:0005634]; peroxisome [GO:0005777]
P47743	GRM8_MOUSE	reviewed	Metabotropic glutamate receptor 8 (mGluR8)	Grm8 Gprc1h Mglur8	Mus musculus (Mouse)	908	GABA-ergic synapse [GO:0098982]; glutamatergic synapse [GO:0098978]; integral component of plasma membrane [GO:0005887]; integral component of presynaptic active zone membrane [GO:0099059]; neuronal cell body [GO:0043025]; neuron projection [GO:0043005]; presynaptic membrane [GO:0042734]
P47746	CNR1_MOUSE	reviewed	Cannabinoid receptor 1 (CB-R) (CB1) (Brain-type cannabinoid receptor)	Cnr1	Mus musculus (Mouse)	473	actin cytoskeleton [GO:0015629]; axon [GO:0030424]; cytoplasm [GO:0005737]; GABA-ergic synapse [GO:0098982]; glutamatergic synapse [GO:0098978]; growth cone [GO:0030426]; integral component of mitochondrial membrane [GO:0032592]; integral component of presynaptic membrane [GO:0099056]; membrane raft [GO:0045121]; mitochondrial outer membrane [GO:0005741]; mitochondrion [GO:0005739]; plasma membra…
P47753	CAZA1_MOUSE	reviewed	F-actin-capping protein subunit alpha-1 (CapZ alpha-1)	Capza1 Cappa1	Mus musculus (Mouse)	286	brush border [GO:0005903]; cell-cell junction [GO:0005911]; cortical cytoskeleton [GO:0030863]; cytosol [GO:0005829]; F-actin capping protein complex [GO:0008290]; membrane [GO:0016020]; WASH complex [GO:0071203]
P47754	CAZA2_MOUSE	reviewed	F-actin-capping protein subunit alpha-2 (CapZ alpha-2)	Capza2 Cappa2	Mus musculus (Mouse)	286	brush border [GO:0005903]; cortical cytoskeleton [GO:0030863]; cytosol [GO:0005829]; F-actin capping protein complex [GO:0008290]; membrane [GO:0016020]
P47757	CAPZB_MOUSE	reviewed	F-actin-capping protein subunit beta (CapZ beta)	Capzb Cappb1	Mus musculus (Mouse)	277	asymmetric synapse [GO:0032279]; brush border [GO:0005903]; cortical cytoskeleton [GO:0030863]; cytoskeletal calyx [GO:0033150]; cytosol [GO:0005829]; dendritic spine [GO:0043197]; F-actin capping protein complex [GO:0008290]; hippocampal mossy fiber to CA3 synapse [GO:0098686]; lamellipodium [GO:0030027]; membrane [GO:0016020]; neuronal cell body [GO:0043025]; postsynaptic density [GO:0014069]; …
P47802	MTX1_MOUSE	reviewed	Metaxin-1 (Mitochondrial outer membrane import complex protein 1)	Mtx1 Mtx Mtxn	Mus musculus (Mouse)	317	cytoplasm [GO:0005737]; integral component of membrane [GO:0016021]; mitochondrial inner membrane [GO:0005743]; mitochondrion [GO:0005739]; SAM complex [GO:0001401]
P47809	MP2K4_MOUSE	reviewed	Dual specificity mitogen-activated protein kinase kinase 4 (MAP kinase kinase 4) (MAPKK 4) (EC 2.7.12.2) (C-JUN N-terminal kinase kinase 1) (JNK kinase 1) (JNKK 1) (JNK-activating kinase 1) (MAPK/ERK kinase 4) (MEK 4) (SAPK/ERK kinase 1) (SEK1)	Map2k4 Jnkk1 Mek4 Mkk4 Prkmk4 Sek1 Serk1 Skk1	Mus musculus (Mouse)	397	axon [GO:0030424]; cytosol [GO:0005829]; dendrite cytoplasm [GO:0032839]; nucleus [GO:0005634]; perikaryon [GO:0043204]
P47857	PFKAM_MOUSE	reviewed	ATP-dependent 6-phosphofructokinase, muscle type (ATP-PFK) (PFK-M) (EC 2.7.1.11) (6-phosphofructokinase type A) (Phosphofructo-1-kinase isozyme A) (PFK-A) (Phosphohexokinase)	Pfkm Pfk-m Pfka	Mus musculus (Mouse)	780	6-phosphofructokinase complex [GO:0005945]; apical plasma membrane [GO:0016324]; cytosol [GO:0005829]; membrane [GO:0016020]; nucleus [GO:0005634]; sperm principal piece [GO:0097228]
P47911	RL6_MOUSE	reviewed	60S ribosomal protein L6 (TAX-responsive enhancer element-binding protein 107) (TAXREB107)	Rpl6	Mus musculus (Mouse)	296	A band [GO:0031672]; cytoplasm [GO:0005737]; cytoplasmic ribonucleoprotein granule [GO:0036464]; cytosol [GO:0005829]; cytosolic large ribosomal subunit [GO:0022625]; cytosolic ribosome [GO:0022626]; nucleolus [GO:0005730]; nucleus [GO:0005634]; polysomal ribosome [GO:0042788]; postsynaptic density [GO:0014069]; rough endoplasmic reticulum [GO:0005791]; synapse [GO:0045202]
P47915	RL29_MOUSE	reviewed	60S ribosomal protein L29	Rpl29 Rpl43	Mus musculus (Mouse)	160	cytosol [GO:0005829]; cytosolic large ribosomal subunit [GO:0022625]; cytosolic ribosome [GO:0022626]; extrinsic component of membrane [GO:0019898]; polysomal ribosome [GO:0042788]; ribosome [GO:0005840]; synapse [GO:0045202]
P47941	CRKL_MOUSE	reviewed	Crk-like protein	Crkl Crkol	Mus musculus (Mouse)	303	cytoplasm [GO:0005737]; cytosol [GO:0005829]; extrinsic component of postsynaptic membrane [GO:0098890]; neuromuscular junction [GO:0031594]; nucleoplasm [GO:0005654]; protein-containing complex [GO:0032991]; synapse [GO:0045202]
P47962	RL5_MOUSE	reviewed	60S ribosomal protein L5	Rpl5	Mus musculus (Mouse)	297	aminoacyl-tRNA synthetase multienzyme complex [GO:0017101]; cytoplasm [GO:0005737]; cytosol [GO:0005829]; cytosolic large ribosomal subunit [GO:0022625]; cytosolic ribosome [GO:0022626]; endoplasmic reticulum [GO:0005783]; nucleolus [GO:0005730]; nucleoplasm [GO:0005654]; nucleus [GO:0005634]; postsynaptic density [GO:0014069]; protein-containing complex [GO:0032991]; ribonucleoprotein complex [G…
P47963	RL13_MOUSE	reviewed	60S ribosomal protein L13 (A52)	Rpl13	Mus musculus (Mouse)	211	cytosol [GO:0005829]; cytosolic large ribosomal subunit [GO:0022625]; cytosolic ribosome [GO:0022626]; endoplasmic reticulum [GO:0005783]; nucleolus [GO:0005730]
P48036	ANXA5_MOUSE	reviewed	Annexin A5 (Anchorin CII) (Annexin V) (Annexin-5) (Calphobindin I) (CBP-I) (Endonexin II) (Lipocortin V) (Placental anticoagulant protein 4) (PP4) (Placental anticoagulant protein I) (PAP-I) (Thromboplastin inhibitor) (Vascular anticoagulant-alpha) (VAC-alpha)	Anxa5 Anx5	Mus musculus (Mouse)	319	axon terminus [GO:0043679]; cell projection [GO:0042995]; collagen-containing extracellular matrix [GO:0062023]; cytoplasm [GO:0005737]; cytosol [GO:0005829]; dendrite [GO:0030425]; endoplasmic reticulum [GO:0005783]; endothelial microparticle [GO:0072563]; external side of plasma membrane [GO:0009897]; extracellular space [GO:0005615]; intercalated disc [GO:0014704]; neuronal cell body [GO:00430…
P48193	EPB41_MOUSE	reviewed	Protein 4.1 (P4.1) (4.1R) (Band 4.1) (Erythrocyte membrane protein band 4.1)	Epb41 Epb4.1 Kiaa4056	Mus musculus (Mouse)	858	actin cytoskeleton [GO:0015629]; basolateral plasma membrane [GO:0016323]; cell cortex region [GO:0099738]; cell junction [GO:0030054]; cortical cytoskeleton [GO:0030863]; cytoplasm [GO:0005737]; cytoplasmic side of plasma membrane [GO:0009898]; cytoskeleton [GO:0005856]; cytosol [GO:0005829]; intercellular bridge [GO:0045171]; membrane [GO:0016020]; mitotic spindle [GO:0072686]; nuclear body [GO…
P48318	DCE1_MOUSE	reviewed	Glutamate decarboxylase 1 (EC 4.1.1.15) (67 kDa glutamic acid decarboxylase) (GAD-67) (Glutamate decarboxylase 67 kDa isoform)	Gad1 Gad67	Mus musculus (Mouse)	593	axon [GO:0030424]; axon terminus [GO:0043679]; cell cortex [GO:0005938]; clathrin-sculpted gamma-aminobutyric acid transport vesicle membrane [GO:0061202]; cytoplasm [GO:0005737]; inhibitory synapse [GO:0060077]; mitochondrion [GO:0005739]; neuron projection terminus [GO:0044306]; presynaptic active zone [GO:0048786]; synapse [GO:0045202]
P48320	DCE2_MOUSE	reviewed	Glutamate decarboxylase 2 (EC 4.1.1.15) (65 kDa glutamic acid decarboxylase) (GAD-65) (Glutamate decarboxylase 65 kDa isoform)	Gad2 Gad65	Mus musculus (Mouse)	585	anchored component of membrane [GO:0031225]; axon [GO:0030424]; clathrin-sculpted gamma-aminobutyric acid transport vesicle membrane [GO:0061202]; cytoplasm [GO:0005737]; cytoplasmic vesicle [GO:0031410]; cytosol [GO:0005829]; Golgi membrane [GO:0000139]; inhibitory synapse [GO:0060077]; perinuclear region of cytoplasm [GO:0048471]; presynaptic membrane [GO:0042734]; synapse [GO:0045202]; synapti…
P48453	PP2BB_MOUSE	reviewed	Serine/threonine-protein phosphatase 2B catalytic subunit beta isoform (EC 3.1.3.16) (CAM-PRP catalytic subunit) (Calmodulin-dependent calcineurin A subunit beta isoform) (CNA beta)	Ppp3cb Calnb	Mus musculus (Mouse)	525	calcineurin complex [GO:0005955]; cytoplasm [GO:0005737]; cytosol [GO:0005829]; glutamatergic synapse [GO:0098978]; plasma membrane [GO:0005886]; protein-containing complex [GO:0032991]; synapse [GO:0045202]; T-tubule [GO:0030315]; Z disc [GO:0030018]
P48678	LMNA_MOUSE	reviewed	Prelamin-A/C [Cleaved into: Lamin-A/C]	Lmna Lmn1	Mus musculus (Mouse)	665	cytosol [GO:0005829]; lamin filament [GO:0005638]; nuclear body [GO:0016604]; nuclear envelope [GO:0005635]; nuclear matrix [GO:0016363]; nuclear membrane [GO:0031965]; nuclear speck [GO:0016607]; nucleoplasm [GO:0005654]; nucleus [GO:0005634]; perinuclear region of cytoplasm [GO:0048471]; site of double-strand break [GO:0035861]
P48722	HS74L_MOUSE	reviewed	Heat shock 70 kDa protein 4L (Heat shock 70-related protein APG-1) (Osmotic stress protein 94)	Hspa4l Apg1 Hsp4l Osp94	Mus musculus (Mouse)	838	cytoplasm [GO:0005737]; cytosol [GO:0005829]; nucleus [GO:0005634]
P48758	CBR1_MOUSE	reviewed	Carbonyl reductase [NADPH] 1 (EC 1.1.1.184) (15-hydroxyprostaglandin dehydrogenase [NADP(+)]) (EC 1.1.1.196) (EC 1.1.1.197) (20-beta-hydroxysteroid dehydrogenase) (NADPH-dependent carbonyl reductase 1) (Prostaglandin 9-ketoreductase) (PG-9-KR) (Prostaglandin-E(2) 9-reductase) (EC 1.1.1.189)	Cbr1 Cbr	Mus musculus (Mouse)	277	cytoplasm [GO:0005737]; intracellular membrane-bounded organelle [GO:0043231]; microvillus [GO:0005902]; nucleus [GO:0005634]; plasma membrane [GO:0005886]
P48771	CX7A2_MOUSE	reviewed	Cytochrome c oxidase subunit 7A2, mitochondrial (Cytochrome c oxidase subunit VIIa-liver/heart) (Cytochrome c oxidase subunit VIIa-L)	Cox7a2 Cox7a3 Cox7al	Mus musculus (Mouse)	83	integral component of membrane [GO:0016021]; mitochondrial inner membrane [GO:0005743]; mitochondrial respirasome [GO:0005746]; mitochondrial respiratory chain complex IV [GO:0005751]; mitochondrion [GO:0005739]
P48774	GSTM5_MOUSE	reviewed	Glutathione S-transferase Mu 5 (EC 2.5.1.18) (Fibrous sheath component 2) (Fsc2) (GST class-mu 5)	Gstm5 Fsc2 Gstm3	Mus musculus (Mouse)	224	cytoplasm [GO:0005737]; cytosol [GO:0005829]; intercellular bridge [GO:0045171]; sperm fibrous sheath [GO:0035686]
P48962	ADT1_MOUSE	reviewed	ADP/ATP translocase 1 (ADP,ATP carrier protein 1) (ADP,ATP carrier protein, heart/skeletal muscle isoform T1) (Adenine nucleotide translocator 1) (ANT 1) (Solute carrier family 25 member 4)	Slc25a4 Aac1 Anc1 Ant1	Mus musculus (Mouse)	298	integral component of mitochondrial membrane [GO:0032592]; membrane [GO:0016020]; membrane raft [GO:0045121]; mitochondrial inner membrane [GO:0005743]; mitochondrial outer membrane [GO:0005741]; mitochondrial permeability transition pore complex [GO:0005757]; mitochondrion [GO:0005739]; myelin sheath [GO:0043209]
P49025	CTRO_MOUSE	reviewed	Citron Rho-interacting kinase (CRIK) (EC 2.7.11.1) (Rho-interacting, serine/threonine-protein kinase 21)	Cit Crik	Mus musculus (Mouse)	2055	actin cytoskeleton [GO:0015629]; cleavage furrow [GO:0032154]; cytoplasm [GO:0005737]; cytoskeleton [GO:0005856]; cytosol [GO:0005829]; Golgi cisterna [GO:0031985]; midbody [GO:0030496]; neuronal cell body [GO:0043025]; nucleus [GO:0005634]; plasma membrane [GO:0005886]; ruffle [GO:0001726]; vacuole [GO:0005773]
P49070	CAMLG_MOUSE	reviewed	Guided entry of tail-anchored proteins factor CAMLG (Calcium signal-modulating cyclophilin ligand)	Camlg Caml Get2	Mus musculus (Mouse)	294	cytoplasm [GO:0005737]; endoplasmic reticulum [GO:0005783]; GET complex [GO:0043529]; integral component of endoplasmic reticulum membrane [GO:0030176]
P49312	ROA1_MOUSE	reviewed	Heterogeneous nuclear ribonucleoprotein A1 (hnRNP A1) (HDP-1) (Helix-destabilizing protein) (Single-strand-binding protein) (Topoisomerase-inhibitor suppressed) (hnRNP core protein A1) [Cleaved into: Heterogeneous nuclear ribonucleoprotein A1, N-terminally processed]	Hnrnpa1 Fli-2 Hnrpa1 Tis	Mus musculus (Mouse)	320	cytoplasm [GO:0005737]; nucleoplasm [GO:0005654]; nucleus [GO:0005634]; ribonucleoprotein complex [GO:1990904]; spliceosomal complex [GO:0005681]
P49442	INPP_MOUSE	reviewed	Inositol polyphosphate 1-phosphatase (IPP) (IPPase) (EC 3.1.3.57)	Inpp1	Mus musculus (Mouse)	396
P49443	PPM1A_MOUSE	reviewed	Protein phosphatase 1A (EC 3.1.3.16) (Protein phosphatase 2C isoform alpha) (PP2C-alpha) (Protein phosphatase IA)	Ppm1a Pppm1a	Mus musculus (Mouse)	382	cytosol [GO:0005829]; membrane [GO:0016020]; neuron projection [GO:0043005]; nucleus [GO:0005634]; plasma membrane [GO:0005886]
P49615	CDK5_MOUSE	reviewed	Cyclin-dependent-like kinase 5 (EC 2.7.11.1) (CR6 protein kinase) (CRK6) (Cell division protein kinase 5) (Serine/threonine-protein kinase PSSALRE) (Tau protein kinase II catalytic subunit) (TPKII catalytic subunit)	Cdk5 Cdkn5 Crk6	Mus musculus (Mouse)	292	axon [GO:0030424]; cell junction [GO:0030054]; cytoplasm [GO:0005737]; cytoskeleton [GO:0005856]; cytosol [GO:0005829]; dendrite [GO:0030425]; filopodium [GO:0030175]; glutamatergic synapse [GO:0098978]; growth cone [GO:0030426]; lamellipodium [GO:0030027]; membrane [GO:0016020]; microtubule [GO:0005874]; neuromuscular junction [GO:0031594]; neuronal cell body [GO:0043025]; neuron projection [GO:…
P49722	PSA2_MOUSE	reviewed	Proteasome subunit alpha type-2 (Macropain subunit C3) (Multicatalytic endopeptidase complex subunit C3) (Proteasome component C3)	Psma2 Lmpc3	Mus musculus (Mouse)	234	cytoplasm [GO:0005737]; cytosol [GO:0005829]; nucleoplasm [GO:0005654]; nucleus [GO:0005634]; P-body [GO:0000932]; proteasome complex [GO:0000502]; proteasome core complex [GO:0005839]; proteasome core complex, alpha-subunit complex [GO:0019773]
P49817	CAV1_MOUSE	reviewed	Caveolin-1	Cav1 Cav	Mus musculus (Mouse)	178	acrosomal membrane [GO:0002080]; apical plasma membrane [GO:0016324]; basal plasma membrane [GO:0009925]; basolateral plasma membrane [GO:0016323]; caveola [GO:0005901]; caveolar macromolecular signaling complex [GO:0002095]; cell cortex [GO:0005938]; cell surface [GO:0009986]; cilium [GO:0005929]; cytoplasm [GO:0005737]; cytoplasmic vesicle [GO:0031410]; cytosol [GO:0005829]; endoplasmic reticul…
P50096	IMDH1_MOUSE	reviewed	Inosine-5'-monophosphate dehydrogenase 1 (IMP dehydrogenase 1) (IMPD 1) (IMPDH 1) (EC 1.1.1.205) (IMPDH-I)	Impdh1	Mus musculus (Mouse)	514	cytoplasm [GO:0005737]; cytosol [GO:0005829]; nucleus [GO:0005634]
P50153	GBG4_MOUSE	reviewed	Guanine nucleotide-binding protein G(I)/G(S)/G(O) subunit gamma-4	Gng4 Gngt4	Mus musculus (Mouse)	75	G-protein beta/gamma-subunit complex [GO:0031680]; heterotrimeric G-protein complex [GO:0005834]
P50247	SAHH_MOUSE	reviewed	Adenosylhomocysteinase (AdoHcyase) (EC 3.3.1.1) (CUBP) (Liver copper-binding protein) (S-adenosyl-L-homocysteine hydrolase)	Ahcy	Mus musculus (Mouse)	432	cytosol [GO:0005829]; melanosome [GO:0042470]; neuron projection [GO:0043005]; nucleus [GO:0005634]
P50396	GDIA_MOUSE	reviewed	Rab GDP dissociation inhibitor alpha (Rab GDI alpha) (Guanosine diphosphate dissociation inhibitor 1) (GDI-1)	Gdi1 Rabgdia	Mus musculus (Mouse)	447	axon [GO:0030424]; cytoplasm [GO:0005737]; Golgi apparatus [GO:0005794]; midbody [GO:0030496]; myelin sheath [GO:0043209]; neuronal cell body [GO:0043025]; neuron projection [GO:0043005]; protein-containing complex [GO:0032991]
P50516	VATA_MOUSE	reviewed	V-type proton ATPase catalytic subunit A (V-ATPase subunit A) (EC 7.1.2.2) (V-ATPase 69 kDa subunit) (Vacuolar proton pump subunit alpha)	Atp6v1a Atp6a1 Atp6a2 Atp6v1a1	Mus musculus (Mouse)	617	apical plasma membrane [GO:0016324]; cytoplasm [GO:0005737]; cytosol [GO:0005829]; intracellular membrane-bounded organelle [GO:0043231]; microvillus [GO:0005902]; mitochondrion [GO:0005739]; myelin sheath [GO:0043209]; nucleoplasm [GO:0005654]; plasma membrane [GO:0005886]; secretory granule [GO:0030141]; transport vesicle [GO:0030133]; vacuolar proton-transporting V-type ATPase, V1 domain [GO:0…
P50518	VATE1_MOUSE	reviewed	V-type proton ATPase subunit E 1 (V-ATPase subunit E 1) (V-ATPase 31 kDa subunit) (p31) (Vacuolar proton pump subunit E 1)	Atp6v1e1 Atp6e Atp6e2	Mus musculus (Mouse)	226	apical plasma membrane [GO:0016324]; cytoplasm [GO:0005737]; cytosol [GO:0005829]; endosome [GO:0005768]; microvillus [GO:0005902]; mitochondrion [GO:0005739]; vacuolar proton-transporting V-type ATPase, V1 domain [GO:0000221]
P50544	ACADV_MOUSE	reviewed	Very long-chain specific acyl-CoA dehydrogenase, mitochondrial (EC 1.3.8.9) (MVLCAD) (VLCAD)	Acadvl Vlcad	Mus musculus (Mouse)	656	extrinsic component of mitochondrial inner membrane [GO:0031314]; mitochondrial inner membrane [GO:0005743]; mitochondrial membrane [GO:0031966]; mitochondrial nucleoid [GO:0042645]; mitochondrion [GO:0005739]; nucleolus [GO:0005730]; nucleoplasm [GO:0005654]
P50580	PA2G4_MOUSE	reviewed	Proliferation-associated protein 2G4 (IRES-specific cellular trans-acting factor 45 kDa) (ITAF45) (Mpp1) (Proliferation-associated protein 1) (Protein p38-2G4)	Pa2g4 Ebp1 Plfap	Mus musculus (Mouse)	394	cytoplasm [GO:0005737]; nucleolus [GO:0005730]; nucleus [GO:0005634]; ribonucleoprotein complex [GO:1990904]
P51150	RAB7A_MOUSE	reviewed	Ras-related protein Rab-7a (EC 3.6.5.2)	Rab7a Rab7	Mus musculus (Mouse)	207	alveolar lamellar body [GO:0097208]; anchored component of synaptic vesicle membrane [GO:0098993]; autophagosome membrane [GO:0000421]; cytoplasm [GO:0005737]; cytoplasmic vesicle [GO:0031410]; cytosol [GO:0005829]; endosome [GO:0005768]; endosome membrane [GO:0010008]; extrinsic component of lysosome membrane [GO:0032419]; Golgi apparatus [GO:0005794]; late endosome [GO:0005770]; late endosome m…
P51163	HEM4_MOUSE	reviewed	Uroporphyrinogen-III synthase (UROIIIS) (UROS) (EC 4.2.1.75) (Hydroxymethylbilane hydrolyase [cyclizing]) (Uroporphyrinogen-III cosynthase)	Uros Uros3	Mus musculus (Mouse)	265	cytosol [GO:0005829]; mitochondrion [GO:0005739]
P51410	RL9_MOUSE	reviewed	60S ribosomal protein L9	Rpl9	Mus musculus (Mouse)	192	cytosol [GO:0005829]; cytosolic large ribosomal subunit [GO:0022625]; cytosolic ribosome [GO:0022626]; synapse [GO:0045202]
P51660	DHB4_MOUSE	reviewed	Peroxisomal multifunctional enzyme type 2 (MFE-2) (17-beta-hydroxysteroid dehydrogenase 4) (17-beta-HSD 4) (D-bifunctional protein) (DBP) (Multifunctional protein 2) (MFP-2) [Cleaved into: (3R)-hydroxyacyl-CoA dehydrogenase (EC 1.1.1.n12); Enoyl-CoA hydratase 2 (EC 4.2.1.107) (EC 4.2.1.119) (3-alpha,7-alpha,12-alpha-trihydroxy-5-beta-cholest-24-enoyl-CoA hydratase)]	Hsd17b4 Edh17b4	Mus musculus (Mouse)	735	mitochondrion [GO:0005739]; peroxisomal matrix [GO:0005782]; peroxisome [GO:0005777]
P51791	CLCN3_MOUSE	reviewed	H(+)/Cl(-) exchange transporter 3 (Chloride channel protein 3) (ClC-3) (Chloride transporter ClC-3)	Clcn3 Clc3	Mus musculus (Mouse)	818	apical plasma membrane [GO:0016324]; axon terminus [GO:0043679]; cytoplasmic vesicle [GO:0031410]; early endosome [GO:0005769]; early endosome membrane [GO:0031901]; endosome [GO:0005768]; endosome membrane [GO:0010008]; external side of plasma membrane [GO:0009897]; GABA-ergic synapse [GO:0098982]; glutamatergic synapse [GO:0098978]; Golgi apparatus [GO:0005794]; inhibitory synapse [GO:0060077];…
P51830	ADCY9_MOUSE	reviewed	Adenylate cyclase type 9 (EC 4.6.1.1) (ATP pyrophosphate-lyase 9) (Adenylate cyclase type IX) (Adenylyl cyclase 9) (AC9) (Adenylyl cyclase type 10) (ACTP10)	Adcy9	Mus musculus (Mouse)	1353	axon [GO:0030424]; dendrite [GO:0030425]; integral component of membrane [GO:0016021]; integral component of plasma membrane [GO:0005887]; membrane [GO:0016020]
P51863	VA0D1_MOUSE	reviewed	V-type proton ATPase subunit d 1 (V-ATPase subunit d 1) (P39) (Physophilin) (V-ATPase 40 kDa accessory protein) (V-ATPase AC39 subunit) (Vacuolar proton pump subunit d 1)	Atp6v0d1 Atp6d	Mus musculus (Mouse)	351	apical plasma membrane [GO:0016324]; axon terminus [GO:0043679]; centrosome [GO:0005813]; early endosome [GO:0005769]; lysosomal membrane [GO:0005765]; membrane [GO:0016020]; neuron projection [GO:0043005]; plasma membrane proton-transporting V-type ATPase complex [GO:0033181]; protein-containing complex [GO:0032991]; proton-transporting V-type ATPase, V0 domain [GO:0033179]; synaptic vesicle [GO…
P51880	FABP7_MOUSE	reviewed	Fatty acid-binding protein, brain (Brain lipid-binding protein) (BLBP) (Brain-type fatty acid-binding protein) (B-FABP) (Fatty acid-binding protein 7)	Fabp7 Blbp	Mus musculus (Mouse)	132	cell body [GO:0044297]; cell-cell junction [GO:0005911]; cell periphery [GO:0071944]; cell projection [GO:0042995]; cytoplasm [GO:0005737]; cytosol [GO:0005829]; neuronal cell body [GO:0043025]; nucleus [GO:0005634]
P51881	ADT2_MOUSE	reviewed	ADP/ATP translocase 2 (ADP,ATP carrier protein 2) (Adenine nucleotide translocator 2) (ANT 2) (Solute carrier family 25 member 5) [Cleaved into: ADP/ATP translocase 2, N-terminally processed]	Slc25a5 Aac2 Ant2	Mus musculus (Mouse)	298	membrane [GO:0016020]; membrane raft [GO:0045121]; mitochondrial inner membrane [GO:0005743]; mitochondrial nucleoid [GO:0042645]; mitochondrial permeability transition pore complex [GO:0005757]; mitochondrion [GO:0005739]; MMXD complex [GO:0071817]; myelin sheath [GO:0043209]
P52479	UBP10_MOUSE	reviewed	Ubiquitin carboxyl-terminal hydrolase 10 (EC 3.4.19.12) (Deubiquitinating enzyme 10) (Ubiquitin thioesterase 10) (Ubiquitin-specific-processing protease 10)	Usp10 Kiaa0190 Ode-1 Uchrp	Mus musculus (Mouse)	792	cytoplasm [GO:0005737]; cytosol [GO:0005829]; early endosome [GO:0005769]; intermediate filament cytoskeleton [GO:0045111]; nucleoplasm [GO:0005654]; nucleus [GO:0005634]; protein-containing complex [GO:0032991]
P52480	KPYM_MOUSE	reviewed	Pyruvate kinase PKM (EC 2.7.1.40) (Pyruvate kinase muscle isozyme)	Pkm Pk3 Pkm2 Pykm	Mus musculus (Mouse)	531	cilium [GO:0005929]; collagen-containing extracellular matrix [GO:0062023]; cytoplasm [GO:0005737]; cytosol [GO:0005829]; mitochondrion [GO:0005739]; myelin sheath [GO:0043209]; nucleus [GO:0005634]; pyruvate kinase complex [GO:1902912]; rough endoplasmic reticulum [GO:0005791]
P52482	UB2E1_MOUSE	reviewed	Ubiquitin-conjugating enzyme E2 E1 (EC 2.3.2.23) ((E3-independent) E2 ubiquitin-conjugating enzyme E1) (EC 2.3.2.24) (E2 ubiquitin-conjugating enzyme E1) (UbcM3) (Ubiquitin carrier protein E1) (Ubiquitin-protein ligase E1)	Ube2e1 Ubce5 Ubcm3	Mus musculus (Mouse)	193	nucleus [GO:0005634]; ubiquitin ligase complex [GO:0000151]
P52734	FGD1_MOUSE	reviewed	FYVE, RhoGEF and PH domain-containing protein 1 (Faciogenital dysplasia 1 protein homolog) (Rho/Rac guanine nucleotide exchange factor FGD1) (Rho/Rac GEF) (Zinc finger FYVE domain-containing protein 3)	Fgd1	Mus musculus (Mouse)	960	cytoplasm [GO:0005737]; cytoskeleton [GO:0005856]; Golgi apparatus [GO:0005794]; lamellipodium [GO:0030027]; ruffle [GO:0001726]
P52795	EFNB1_MOUSE	reviewed	Ephrin-B1 (CEK5 receptor ligand) (CEK5-L) (EFL-3) (ELK ligand) (ELK-L) (EPH-related receptor tyrosine kinase ligand 2) (LERK-2) (Stimulated by retinoic acid gene 1 protein) [Cleaved into: Ephrin-B1 C-terminal fragment (Ephrin-B1 CTF); Ephrin-B1 intracellular domain (Ephrin-B1 ICD)]	Efnb1 Epl2 Eplg2 Lerk2 Stra1	Mus musculus (Mouse)	345	cytoplasm [GO:0005737]; glutamatergic synapse [GO:0098978]; integral component of presynaptic membrane [GO:0099056]; membrane raft [GO:0045121]; nucleus [GO:0005634]; plasma membrane [GO:0005886]; synapse [GO:0045202]
P52800	EFNB2_MOUSE	reviewed	Ephrin-B2 (ELF-2) (EPH-related receptor tyrosine kinase ligand 5) (LERK-5) (HTK ligand) (HTK-L)	Efnb2 Elf2 Epl5 Eplg5 Htkl Lerk5	Mus musculus (Mouse)	336	adherens junction [GO:0005912]; glutamatergic synapse [GO:0098978]; integral component of postsynaptic density membrane [GO:0099061]; integral component of presynaptic membrane [GO:0099056]; plasma membrane [GO:0005886]; Schaffer collateral - CA1 synapse [GO:0098685]
P53702	CCHL_MOUSE	reviewed	Holocytochrome c-type synthase (EC 4.4.1.17) (Cytochrome c-type heme lyase) (CCHL)	Hccs Cchl	Mus musculus (Mouse)	272	cytosol [GO:0005829]; membrane [GO:0016020]; mitochondrial inner membrane [GO:0005743]; mitochondrion [GO:0005739]
P53810	PIPNA_MOUSE	reviewed	Phosphatidylinositol transfer protein alpha isoform (PI-TP-alpha) (PtdIns transfer protein alpha) (PtdInsTP alpha)	Pitpna Pitpn	Mus musculus (Mouse)	271	cytoplasm [GO:0005737]; cytosol [GO:0005829]; integral component of membrane [GO:0016021]; myelin sheath [GO:0043209]; nucleus [GO:0005634]
P53811	PIPNB_MOUSE	reviewed	Phosphatidylinositol transfer protein beta isoform (PI-TP-beta) (PtdIns transfer protein beta) (PtdInsTP beta)	Pitpnb	Mus musculus (Mouse)	271	cytoplasm [GO:0005737]; endoplasmic reticulum membrane [GO:0005789]; Golgi apparatus [GO:0005794]; Golgi membrane [GO:0000139]
P53986	MOT1_MOUSE	reviewed	Monocarboxylate transporter 1 (MCT 1) (Solute carrier family 16 member 1)	Slc16a1 Mct1	Mus musculus (Mouse)	493	apical plasma membrane [GO:0016324]; basal plasma membrane [GO:0009925]; basolateral plasma membrane [GO:0016323]; cell junction [GO:0030054]; centrosome [GO:0005813]; integral component of membrane [GO:0016021]; integral component of plasma membrane [GO:0005887]; intracellular membrane-bounded organelle [GO:0043231]; lateral plasma membrane [GO:0016328]; mitochondrion [GO:0005739]; plasma membra…
P53994	RAB2A_MOUSE	reviewed	Ras-related protein Rab-2A	Rab2a Rab2	Mus musculus (Mouse)	212	anchored component of synaptic vesicle membrane [GO:0098993]; endoplasmic reticulum-Golgi intermediate compartment membrane [GO:0033116]; endoplasmic reticulum membrane [GO:0005789]; Golgi apparatus [GO:0005794]; Golgi membrane [GO:0000139]; melanosome [GO:0042470]; membrane [GO:0016020]; neuronal cell body [GO:0043025]; perinuclear region of cytoplasm [GO:0048471]
P53996	CNBP_MOUSE	reviewed	CCHC-type zinc finger nucleic acid binding protein (Cellular nucleic acid-binding protein) (CNBP) (Zinc finger protein 9)	Cnbp Cnbp1 Znf9	Mus musculus (Mouse)	178	cytoplasm [GO:0005737]; cytosol [GO:0005829]; endoplasmic reticulum [GO:0005783]; nucleus [GO:0005634]
P54071	IDHP_MOUSE	reviewed	Isocitrate dehydrogenase [NADP], mitochondrial (IDH) (EC 1.1.1.42) (ICD-M) (IDP) (NADP(+)-specific ICDH) (Oxalosuccinate decarboxylase)	Idh2	Mus musculus (Mouse)	452	cytosol [GO:0005829]; mitochondrial inner membrane [GO:0005743]; mitochondrion [GO:0005739]; peroxisome [GO:0005777]
P54227	STMN1_MOUSE	reviewed	Stathmin (Leukemia-associated gene protein) (Leukemia-associated phosphoprotein p18) (Metablastin) (Oncoprotein 18) (Op18) (Phosphoprotein p19) (pp19) (Prosolin) (Protein Pr22) (pp17)	Stmn1 Lag Lap18 Pr22	Mus musculus (Mouse)	149	cytoplasm [GO:0005737]; cytosol [GO:0005829]; membrane [GO:0016020]; microtubule [GO:0005874]; neuron projection [GO:0043005]
P54285	CACB3_MOUSE	reviewed	Voltage-dependent L-type calcium channel subunit beta-3 (CAB3) (Calcium channel voltage-dependent subunit beta 3) (CCHB3)	Cacnb3 Cacnlb3	Mus musculus (Mouse)	484	apical plasma membrane [GO:0016324]; cytoplasm [GO:0005737]; L-type voltage-gated calcium channel complex [GO:1990454]; membrane [GO:0016020]; plasma membrane [GO:0005886]; synapse [GO:0045202]; voltage-gated calcium channel complex [GO:0005891]
P54728	RD23B_MOUSE	reviewed	UV excision repair protein RAD23 homolog B (HR23B) (mHR23B) (XP-C repair-complementing complex 58 kDa protein) (p58)	Rad23b Mhr23b	Mus musculus (Mouse)	416	cytoplasm [GO:0005737]; cytosol [GO:0005829]; nucleoplasm [GO:0005654]; nucleus [GO:0005634]; proteasome complex [GO:0000502]; XPC complex [GO:0071942]
P54754	EPHB3_MOUSE	reviewed	Ephrin type-B receptor 3 (EC 2.7.10.1) (Developmental kinase 5) (mDK-5) (Tyrosine-protein kinase receptor SEK-4)	Ephb3 Etk2 Mdk5 Sek4	Mus musculus (Mouse)	993	dendrite [GO:0030425]; integral component of plasma membrane [GO:0005887]; neuron projection [GO:0043005]; receptor complex [GO:0043235]
P54763	EPHB2_MOUSE	reviewed	Ephrin type-B receptor 2 (EC 2.7.10.1) (Neural kinase) (Nuk receptor tyrosine kinase) (Tyrosine-protein kinase receptor EPH-3) (Tyrosine-protein kinase receptor SEK-3) [Cleaved into: EphB2/CTF1; EphB2/CTF2]	Ephb2 Epth3 Nuk Sek3	Mus musculus (Mouse)	986	axon [GO:0030424]; dendrite [GO:0030425]; glutamatergic synapse [GO:0098978]; integral component of plasma membrane [GO:0005887]; integral component of postsynaptic membrane [GO:0099055]; integral component of presynaptic membrane [GO:0099056]; neuronal cell body [GO:0043025]; neuron projection [GO:0043005]; nucleoplasm [GO:0005654]; plasma membrane [GO:0005886]; receptor complex [GO:0043235]; sy…
P54775	PRS6B_MOUSE	reviewed	26S proteasome regulatory subunit 6B (26S proteasome AAA-ATPase subunit RPT3) (CIP21) (MB67-interacting protein) (MIP224) (Proteasome 26S subunit ATPase 4) (Tat-binding protein 7) (TBP-7)	Psmc4 Tbp7	Mus musculus (Mouse)	418	cytosol [GO:0005829]; cytosolic proteasome complex [GO:0031597]; inclusion body [GO:0016234]; nucleoplasm [GO:0005654]; proteasome accessory complex [GO:0022624]; proteasome complex [GO:0000502]; proteasome regulatory particle, base subcomplex [GO:0008540]; synapse [GO:0045202]
P54822	PUR8_MOUSE	reviewed	Adenylosuccinate lyase (ASL) (EC 4.3.2.2) (Adenylosuccinase) (ASase)	Adsl Adl	Mus musculus (Mouse)	484	cytosol [GO:0005829]; mitochondrion [GO:0005739]; protein-containing complex [GO:0032991]
P54823	DDX6_MOUSE	reviewed	Probable ATP-dependent RNA helicase DDX6 (EC 3.6.4.13) (ATP-dependent RNA helicase p54) (DEAD box protein 6) (Oncogene RCK homolog)	Ddx6 Hlr2 Rck	Mus musculus (Mouse)	483	adherens junction [GO:0005912]; chromatoid body [GO:0033391]; concave side of sperm head [GO:0061830]; cytoplasm [GO:0005737]; cytoplasmic ribonucleoprotein granule [GO:0036464]; cytoplasmic stress granule [GO:0010494]; cytosol [GO:0005829]; heterochromatin [GO:0000792]; mitochondrion [GO:0005739]; nucleolus [GO:0005730]; nucleus [GO:0005634]; outer dense fiber [GO:0001520]; P-body [GO:0000932]; …
P54830	PTN5_MOUSE	reviewed	Tyrosine-protein phosphatase non-receptor type 5 (EC 3.1.3.48) (Neural-specific protein-tyrosine phosphatase) (Striatum-enriched protein-tyrosine phosphatase) (STEP)	Ptpn5	Mus musculus (Mouse)	541	axon [GO:0030424]; cytosol [GO:0005829]; endoplasmic reticulum [GO:0005783]; endoplasmic reticulum membrane [GO:0005789]; integral component of membrane [GO:0016021]; membrane [GO:0016020]; neuronal cell body [GO:0043025]; perikaryon [GO:0043204]; proximal dendrite [GO:1990635]; synaptic membrane [GO:0097060]; synaptic vesicle [GO:0008021]
P55012	S12A2_MOUSE	reviewed	Solute carrier family 12 member 2 (Basolateral Na-K-Cl symporter) (Bumetanide-sensitive sodium-(potassium)-chloride cotransporter 2)	Slc12a2 Nkcc1	Mus musculus (Mouse)	1205	apical plasma membrane [GO:0016324]; basal plasma membrane [GO:0009925]; basolateral plasma membrane [GO:0016323]; cell body [GO:0044297]; cell periphery [GO:0071944]; cell projection [GO:0042995]; cytoplasmic vesicle membrane [GO:0030659]; cytosol [GO:0005829]; integral component of membrane [GO:0016021]; lateral plasma membrane [GO:0016328]; neuronal cell body [GO:0043025]; neuron projection [G…
P55088	AQP4_MOUSE	reviewed	Aquaporin-4 (AQP-4) (Mercurial-insensitive water channel) (MIWC) (WCH4)	Aqp4	Mus musculus (Mouse)	323	astrocyte end-foot [GO:0097450]; basal plasma membrane [GO:0009925]; basolateral plasma membrane [GO:0016323]; cell-cell junction [GO:0005911]; cell projection membrane [GO:0031253]; cytoplasm [GO:0005737]; endosome membrane [GO:0010008]; external side of plasma membrane [GO:0009897]; extracellular region [GO:0005576]; integral component of membrane [GO:0016021]; integral component of plasma memb…
P55096	ABCD3_MOUSE	reviewed	ATP-binding cassette sub-family D member 3 (EC 3.1.2.-) (EC 7.6.2.-) (68 kDa peroxisomal membrane protein) (PMP68) (70 kDa peroxisomal membrane protein) (PMP70)	Abcd3 Pmp70 Pxmp1	Mus musculus (Mouse)	659	integral component of membrane [GO:0016021]; intracellular membrane-bounded organelle [GO:0043231]; mitochondrial inner membrane [GO:0005743]; mitochondrion [GO:0005739]; peroxisomal matrix [GO:0005782]; peroxisomal membrane [GO:0005778]; peroxisome [GO:0005777]
P55258	RAB8A_MOUSE	reviewed	Ras-related protein Rab-8A (Oncogene c-mel)	Rab8a Mel Rab8	Mus musculus (Mouse)	207	centriole [GO:0005814]; centrosome [GO:0005813]; ciliary basal body [GO:0036064]; ciliary base [GO:0097546]; cilium [GO:0005929]; cytoplasmic vesicle [GO:0031410]; cytoplasmic vesicle membrane [GO:0030659]; dendrite [GO:0030425]; dendritic spine [GO:0043197]; endosome [GO:0005768]; glutamatergic synapse [GO:0098978]; Golgi apparatus [GO:0005794]; midbody [GO:0030496]; neuronal cell body [GO:00430…
P55264	ADK_MOUSE	reviewed	Adenosine kinase (AK) (EC 2.7.1.20) (Adenosine 5'-phosphotransferase)	Adk	Mus musculus (Mouse)	361	cytoplasm [GO:0005737]; cytosol [GO:0005829]; nucleoplasm [GO:0005654]; nucleus [GO:0005634]; plasma membrane [GO:0005886]
P55288	CAD11_MOUSE	reviewed	Cadherin-11 (OSF-4) (Osteoblast cadherin) (OB-cadherin)	Cdh11 Cad-11	Mus musculus (Mouse)	796	adherens junction [GO:0005912]; catenin complex [GO:0016342]; cytoplasm [GO:0005737]; glutamatergic synapse [GO:0098978]; integral component of membrane [GO:0016021]; plasma membrane [GO:0005886]; Schaffer collateral - CA1 synapse [GO:0098685]; synapse [GO:0045202]
P55821	STMN2_MOUSE	reviewed	Stathmin-2 (Superior cervical ganglion-10 protein) (Protein SCG10)	Stmn2 Scg10 Scgn10 Stmb2	Mus musculus (Mouse)	179	cytoplasm [GO:0005737]; endosome [GO:0005768]; Golgi apparatus [GO:0005794]; growth cone [GO:0030426]; lamellipodium [GO:0030027]; membrane [GO:0016020]; neuronal cell body [GO:0043025]; neuron projection [GO:0043005]; perinuclear region of cytoplasm [GO:0048471]; vesicle [GO:0031982]
P55937	GOGA3_MOUSE	reviewed	Golgin subfamily A member 3 (Golgin-160) (Male-enhanced antigen 2) (MEA-2)	Golga3 Mea2	Mus musculus (Mouse)	1487	cytosol [GO:0005829]; endoplasmic reticulum-Golgi intermediate compartment [GO:0005793]; extrinsic component of Golgi membrane [GO:0090498]; Golgi apparatus [GO:0005794]; Golgi cisterna membrane [GO:0032580]; Golgi membrane [GO:0000139]; nucleolus [GO:0005730]; nucleoplasm [GO:0005654]
P56371	RAB4A_MOUSE	reviewed	Ras-related protein Rab-4A (EC 3.6.5.2)	Rab4a Rab4	Mus musculus (Mouse)	218	anchored component of synaptic vesicle membrane [GO:0098993]; cytoplasm [GO:0005737]; cytoplasmic vesicle membrane [GO:0030659]; cytosol [GO:0005829]; early endosome membrane [GO:0031901]; endosome [GO:0005768]; extracellular exosome [GO:0070062]; insulin-responsive compartment [GO:0032593]; intracellular membrane-bounded organelle [GO:0043231]; membrane [GO:0016020]; perinuclear region of cytopl…
P56380	AP4A_MOUSE	reviewed	Bis(5'-nucleosyl)-tetraphosphatase [asymmetrical] (EC 3.6.1.17) (Diadenosine 5',5'''-P1,P4-tetraphosphate asymmetrical hydrolase) (Ap4A hydrolase) (Ap4Aase) (Diadenosine tetraphosphatase) (Nucleoside diphosphate-linked moiety X motif 2) (Nudix motif 2)	Nudt2 Apah1	Mus musculus (Mouse)	147	mitochondrion [GO:0005739]
P56382	ATP5E_MOUSE	reviewed	ATP synthase subunit epsilon, mitochondrial (ATPase subunit epsilon) (ATP synthase F1 subunit epsilon)	Atp5f1e Atp5e	Mus musculus (Mouse)	52	mitochondrial inner membrane [GO:0005743]; mitochondrial proton-transporting ATP synthase complex [GO:0005753]; mitochondrial proton-transporting ATP synthase complex, catalytic sector F(1) [GO:0000275]; mitochondrion [GO:0005739]
P56391	CX6B1_MOUSE	reviewed	Cytochrome c oxidase subunit 6B1 (Cytochrome c oxidase subunit VIb isoform 1) (COX VIb-1)	Cox6b1 Cox6b	Mus musculus (Mouse)	86	mitochondrial inner membrane [GO:0005743]; mitochondrion [GO:0005739]; respiratory chain complex IV [GO:0045277]
P56395	CYB5_MOUSE	reviewed	Cytochrome b5	Cyb5a Cyb5	Mus musculus (Mouse)	134	cytosol [GO:0005829]; endoplasmic reticulum [GO:0005783]; endoplasmic reticulum membrane [GO:0005789]; integral component of membrane [GO:0016021]; intracellular membrane-bounded organelle [GO:0043231]; membrane [GO:0016020]; mitochondrion [GO:0005739]
P56399	UBP5_MOUSE	reviewed	Ubiquitin carboxyl-terminal hydrolase 5 (EC 3.4.19.12) (Deubiquitinating enzyme 5) (Isopeptidase T) (Ubiquitin thioesterase 5) (Ubiquitin-specific-processing protease 5)	Usp5 Isot	Mus musculus (Mouse)	858	cytosol [GO:0005829]; nucleus [GO:0005634]
P56480	ATPB_MOUSE	reviewed	ATP synthase subunit beta, mitochondrial (EC 7.1.2.2) (ATP synthase F1 subunit beta)	Atp5f1b Atp5b	Mus musculus (Mouse)	529	cell surface [GO:0009986]; membrane [GO:0016020]; membrane raft [GO:0045121]; mitochondrial inner membrane [GO:0005743]; mitochondrial membrane [GO:0031966]; mitochondrial nucleoid [GO:0042645]; mitochondrial proton-transporting ATP synthase complex [GO:0005753]; mitochondrial proton-transporting ATP synthase complex, catalytic sector F(1) [GO:0000275]; mitochondrion [GO:0005739]; myelin sheath […
P56564	EAA1_MOUSE	reviewed	Excitatory amino acid transporter 1 (Glial high affinity glutamate transporter) (High-affinity neuronal glutamate transporter) (GluT-1) (Sodium-dependent glutamate/aspartate transporter 1) (GLAST-1) (Solute carrier family 1 member 3)	Slc1a3 Eaat1 Gmt1	Mus musculus (Mouse)	543	basal plasma membrane [GO:0009925]; basolateral plasma membrane [GO:0016323]; cell periphery [GO:0071944]; cell projection [GO:0042995]; cell surface [GO:0009986]; dendritic spine [GO:0043197]; integral component of plasma membrane [GO:0005887]; membrane protein complex [GO:0098796]; mitochondrial inner membrane [GO:0005743]; neuronal cell body [GO:0043025]; neuron projection [GO:0043005]; plasma…
P56695	WFS1_MOUSE	reviewed	Wolframin	Wfs1	Mus musculus (Mouse)	890	dendrite [GO:0030425]; endoplasmic reticulum [GO:0005783]; integral component of endoplasmic reticulum membrane [GO:0030176]; integral component of synaptic vesicle membrane [GO:0030285]; secretory granule [GO:0030141]
P56812	PDCD5_MOUSE	reviewed	Programmed cell death protein 5 (TF-1 cell apoptosis-related protein 19) (Protein TFAR19)	Pdcd5 Tfar19	Mus musculus (Mouse)	126	cytoplasm [GO:0005737]; cytosol [GO:0005829]; nucleus [GO:0005634]
P56959	FUS_MOUSE	reviewed	RNA-binding protein FUS (Protein pigpen)	Fus	Mus musculus (Mouse)	518	cytoplasm [GO:0005737]; dendrite [GO:0030425]; dendritic spine [GO:0043197]; dendritic spine head [GO:0044327]; neuronal cell body [GO:0043025]; nucleoplasm [GO:0005654]; nucleus [GO:0005634]; perikaryon [GO:0043204]; perinuclear region of cytoplasm [GO:0048471]; polysome [GO:0005844]
P57080	UBP25_MOUSE	reviewed	Ubiquitin carboxyl-terminal hydrolase 25 (EC 3.4.19.12) (Deubiquitinating enzyme 25) (Ubiquitin thioesterase 25) (Ubiquitin-specific-processing protease 25) (mUSP25)	Usp25	Mus musculus (Mouse)	1055	cytosol [GO:0005829]; endoplasmic reticulum [GO:0005783]; nucleus [GO:0005634]; proteasome complex [GO:0000502]
P57722	PCBP3_MOUSE	reviewed	Poly(rC)-binding protein 3 (Alpha-CP3)	Pcbp3	Mus musculus (Mouse)	371	cytoplasm [GO:0005737]; nucleus [GO:0005634]
P57746	VATD_MOUSE	reviewed	V-type proton ATPase subunit D (V-ATPase subunit D) (V-ATPase 28 kDa accessory protein) (Vacuolar proton pump subunit D)	Atp6v1d Atp6m Vatd	Mus musculus (Mouse)	247	centrosome [GO:0005813]; cilium [GO:0005929]; membrane [GO:0016020]; proton-transporting V-type ATPase complex [GO:0033176]
P57759	ERP29_MOUSE	reviewed	Endoplasmic reticulum resident protein 29 (ERp29)	Erp29	Mus musculus (Mouse)	262	cell surface [GO:0009986]; endoplasmic reticulum [GO:0005783]; endoplasmic reticulum lumen [GO:0005788]; melanosome [GO:0042470]; smooth endoplasmic reticulum [GO:0005790]; transport vesicle [GO:0030133]
P57776	EF1D_MOUSE	reviewed	Elongation factor 1-delta (EF-1-delta)	Eef1d	Mus musculus (Mouse)	281	cytoplasm [GO:0005737]; cytosol [GO:0005829]; eukaryotic translation elongation factor 1 complex [GO:0005853]; fibrillar center [GO:0001650]; glutamatergic synapse [GO:0098978]; nucleoplasm [GO:0005654]; nucleus [GO:0005634]; synapse [GO:0045202]
P57780	ACTN4_MOUSE	reviewed	Alpha-actinin-4 (Non-muscle alpha-actinin 4)	Actn4	Mus musculus (Mouse)	912	cell-cell junction [GO:0005911]; cortical cytoskeleton [GO:0030863]; cytoplasm [GO:0005737]; cytosol [GO:0005829]; neuron projection [GO:0043005]; nuclear body [GO:0016604]; nucleus [GO:0005634]; perinuclear region of cytoplasm [GO:0048471]; protein-containing complex [GO:0032991]; pseudopodium [GO:0031143]; ribonucleoprotein complex [GO:1990904]; stress fiber [GO:0001725]; Z disc [GO:0030018]
P58242	ASM3B_MOUSE	reviewed	Acid sphingomyelinase-like phosphodiesterase 3b (ASM-like phosphodiesterase 3b) (EC 3.1.4.-)	Smpdl3b Asml3b	Mus musculus (Mouse)	456	anchored component of membrane [GO:0031225]; extracellular space [GO:0005615]; plasma membrane [GO:0005886]
P58252	EF2_MOUSE	reviewed	Elongation factor 2 (EF-2)	Eef2	Mus musculus (Mouse)	858	aggresome [GO:0016235]; cytoplasm [GO:0005737]; cytosol [GO:0005829]; membrane raft [GO:0045121]; plasma membrane [GO:0005886]; polysomal ribosome [GO:0042788]; polysome [GO:0005844]; ribonucleoprotein complex [GO:1990904]; synapse [GO:0045202]
P58281	OPA1_MOUSE	reviewed	Dynamin-like 120 kDa protein, mitochondrial (EC 3.6.5.5) (Large GTP-binding protein) (LargeG) (Optic atrophy protein 1 homolog) [Cleaved into: Dynamin-like 120 kDa protein, form S1]	Opa1	Mus musculus (Mouse)	960	cytoplasm [GO:0005737]; cytosol [GO:0005829]; dendrite [GO:0030425]; extrinsic component of mitochondrial inner membrane [GO:0031314]; integral component of membrane [GO:0016021]; membrane [GO:0016020]; mitochondrial crista [GO:0030061]; mitochondrial inner membrane [GO:0005743]; mitochondrial intermembrane space [GO:0005758]; mitochondrial membrane [GO:0031966]; mitochondrial outer membrane [GO:…
P58389	PTPA_MOUSE	reviewed	Serine/threonine-protein phosphatase 2A activator (EC 5.2.1.8) (PP2A, subunit B', PR53 isoform) (Phosphotyrosyl phosphatase activator) (PTPA) (Serine/threonine-protein phosphatase 2A regulatory subunit 4) (Serine/threonine-protein phosphatase 2A regulatory subunit B')	Ptpa Ppp2r4	Mus musculus (Mouse)	323	calcium channel complex [GO:0034704]; cytoplasm [GO:0005737]; nucleoplasm [GO:0005654]; nucleus [GO:0005634]; protein phosphatase type 2A complex [GO:0000159]
P58404	STRN4_MOUSE	reviewed	Striatin-4 (Zinedin)	Strn4 Zin	Mus musculus (Mouse)	760	cytoplasm [GO:0005737]; dendrite [GO:0030425]; dendritic spine [GO:0043197]; FAR/SIN/STRIPAK complex [GO:0090443]; membrane [GO:0016020]; protein-containing complex [GO:0032991]
P58771	TPM1_MOUSE	reviewed	Tropomyosin alpha-1 chain (Alpha-tropomyosin) (Tropomyosin-1)	Tpm1 Tpm-1 Tpma	Mus musculus (Mouse)	284	actin cytoskeleton [GO:0015629]; actin filament [GO:0005884]; cytoplasm [GO:0005737]; muscle thin filament tropomyosin [GO:0005862]; myofibril [GO:0030016]; protein-containing complex [GO:0032991]
P58871	TB182_MOUSE	reviewed	182 kDa tankyrase-1-binding protein	Tnks1bp1 Kiaa1741 Tab182	Mus musculus (Mouse)	1720	actin cytoskeleton [GO:0015629]; adherens junction [GO:0005912]; CCR4-NOT complex [GO:0030014]; cytoplasm [GO:0005737]; heterochromatin [GO:0000792]; nucleus [GO:0005634]; plasma membrane [GO:0005886]
P59017	B2L13_MOUSE	reviewed	Bcl-2-like protein 13 (Bcl2-L-13) (Bcl-rambo) (Protein Mil1)	Bcl2l13 Mil1	Mus musculus (Mouse)	434	integral component of membrane [GO:0016021]; mitochondrial membrane [GO:0031966]; mitochondrion [GO:0005739]
P59108	CPNE2_MOUSE	reviewed	Copine-2 (Copine II)	Cpne2	Mus musculus (Mouse)	548	cytoplasm [GO:0005737]; nucleus [GO:0005634]; plasma membrane [GO:0005886]
P59281	RHG39_MOUSE	reviewed	Rho GTPase-activating protein 39	Arhgap39 D15Wsu169e Kiaa1688	Mus musculus (Mouse)	1107	cytoplasm [GO:0005737]; cytoskeleton [GO:0005856]; glutamatergic synapse [GO:0098978]; nucleus [GO:0005634]; postsynapse [GO:0098794]
P59325	IF5_MOUSE	reviewed	Eukaryotic translation initiation factor 5 (eIF-5)	Eif5	Mus musculus (Mouse)	429	cytoplasm [GO:0005737]; cytosol [GO:0005829]; plasma membrane [GO:0005886]
P59644	PI5PA_MOUSE	reviewed	Phosphatidylinositol 4,5-bisphosphate 5-phosphatase A (EC 3.1.3.56) (Inositol polyphosphate 5-phosphatase J)	Inpp5j Pib5pa	Mus musculus (Mouse)	1003	cytoplasm [GO:0005737]; dendritic shaft [GO:0043198]; extrinsic component of membrane [GO:0019898]; growth cone [GO:0030426]; plasma membrane [GO:0005886]; ruffle [GO:0001726]
P59759	MRTFB_MOUSE	reviewed	Myocardin-related transcription factor B (MRTF-B) (MKL/myocardin-like protein 2)	Mrtfb Mkl2	Mus musculus (Mouse)	1080	cytoplasm [GO:0005737]; nucleus [GO:0005634]
P59764	DOCK4_MOUSE	reviewed	Dedicator of cytokinesis protein 4	Dock4 Kiaa0716	Mus musculus (Mouse)	1978	cytosol [GO:0005829]; Golgi apparatus [GO:0005794]; membrane [GO:0016020]; nucleolus [GO:0005730]; plasma membrane [GO:0005886]; stereocilium [GO:0032420]; stereocilium bundle [GO:0032421]
P59999	ARPC4_MOUSE	reviewed	Actin-related protein 2/3 complex subunit 4 (Arp2/3 complex 20 kDa subunit) (p20-ARC)	Arpc4 Arc20	Mus musculus (Mouse)	168	Arp2/3 protein complex [GO:0005885]; cell projection [GO:0042995]; cytoplasm [GO:0005737]; nucleus [GO:0005634]; site of double-strand break [GO:0035861]
P60122	RUVB1_MOUSE	reviewed	RuvB-like 1 (EC 3.6.4.12) (49 kDa TATA box-binding protein-interacting protein) (49 kDa TBP-interacting protein) (DNA helicase p50) (Pontin 52) (TIP49a)	Ruvbl1 Tip49 Tip49a	Mus musculus (Mouse)	456	cytosol [GO:0005829]; dynein axonemal particle [GO:0120293]; Ino80 complex [GO:0031011]; MLL1 complex [GO:0071339]; NuA4 histone acetyltransferase complex [GO:0035267]; nuclear matrix [GO:0016363]; nucleoplasm [GO:0005654]; nucleus [GO:0005634]; protein-containing complex [GO:0032991]; R2TP complex [GO:0097255]; ribonucleoprotein complex [GO:1990904]; Swr1 complex [GO:0000812]
P60202	MYPR_MOUSE	reviewed	Myelin proteolipid protein (PLP) (Lipophilin)	Plp1 Plp	Mus musculus (Mouse)	277	integrin alphav-beta3 complex [GO:0034683]; myelin sheath [GO:0043209]; plasma membrane [GO:0005886]
[truncated: 2,082 more rows]
