# Supplementary material for: Dynamic proteomic and phosphoproteomic atlas of corticostriatal axons in neurodevelopment
Source: eLife. 2022 Oct 14;11:e78847. doi: 10.7554/eLife.78847 (PMC9629834; doi:10.7554/eLife.78847)
Supplement: Supplementary file 6. [file elife-78847-supp6.xlsx]

## Sheet: axon_enriched
Category	Term	Count	%	PValue	Genes	List Total	Pop Hits	Pop Total	Fold Enrichment	Bonferroni	Benjamini	FDR
GOTERM_CC_DIRECT	GO:0005737~cytoplasm	327	67.1458	8.13859e-07	Q62523, P55821, Q9ES28, Q61315, Q8BKX1, O35495, Q9Z2D3, Q5SXA9, Q61792, Q8C7M3, Q69ZW3, O08553, Q9QXJ1, Q8R0S2, P46664, Q8CIQ7, Q9Z1S8, Q60598, Q6PB44, Q62415, Q8BVL9, P30999, Q62418, Q69ZX8, Q80WT5, P39688, Q9WTQ5, Q3TY60, Q5DQR4, Q99MI1, O88447, P24529, P42859, P63330, Q8BPQ7, O88448, Q9Z2V5, Q8CJ19, O88444, Q9WVE8, Q8BYA0, Q9WUT3, Q922H1, Q9CZ44, Q9JKB1, Q9CX00, P59764, Q62188, P56812, P21107,…	464	1592	2629	1.1638	0.000329559	0.000329613	0.000318219
GOTERM_CC_DIRECT	GO:0043005~neuron projection	62	12.731	1.93103e-06	P55821, Q61037, Q9ES28, Q61315, Q8BKX1, Q69ZS6, P10637, Q3UHK6, Q9QYX7, Q68FF6, Q8CHC4, O08553, Q8CHG7, O88737, Q14BI2, Q4KUS2, P63042, Q3UMR0, A2A8L5, O35927, Q5SYD0, Q9ESN9, Q8BG39, Q925T6, Q61644, Q9WVQ1, O70166, Q61768, P70296, O88809, Q99P72, Q80TR1, P54227, Q9WVI9, P24529, O88447, O88448, Q02248, P63330, Q9Z2V5, Q9JKF6, Q3TXX4, P21107, Q6PH08, P28738, G5E8K5, Q5SVL6, Q60575, P26450, Q62077,…	464	199	2629	1.76527	0.00078176	0.000387291	0.000373903
GOTERM_CC_DIRECT	GO:0030054~cell junction	73	14.9897	2.86882e-06	Q62523, Q9ES28, O89032, Q61315, Q69ZS6, Q69ZS8, Q6PAJ1, Q5SW75, Q80U40, Q8C7M3, Q8R191, Q9QYX7, P14873, Q8CHG7, Q8CGE9, O88737, Q3UJP5, Q8BPN8, Q14BI2, Q4KUS2, O35927, Q8BG39, Q925T6, Q5SSM3, Q91Z67, Q60598, Q61644, Q9WVQ1, Q8BIW1, P70451, Q62418, O70161, Q9D394, Q8R5H6, Q8BYR5, Q80TR1, O55100, A2ALU4, Q03137, Q99N28, Q80TJ1, Q02248, Q8BJI1, Q6V4S5, Q8K341, Q8BYA0, Q99KY4, Q7TT50, Q9JKF6, P80560,…	464	250	2629	1.65446	0.0011612	0.000387291	0.000373903
GOTERM_CC_DIRECT	GO:0005874~microtubule	44	9.03491	5.58502e-06	Q8BYA0, Q61699, A2AHC3, Q61315, P10637, Q80TQ2, P28184, Q9Z0H8, Q6PER3, P14873, Q9CRB6, Q8CHC4, O08553, Q8R001, Q80U49, Q9QXL1, Q8BRT1, P28738, Q8R1Q8, Q60575, Q8CH77, Q8BVL9, Q61768, Q8K2Q9, Q80VC9, Q9ERR1, O08539, O88809, Q7TPM6, Q9Z1K7, P54227, A2ALU4, P68369, P68368, P33175, O88447, Q6NVE8, Q8CGF6, Q811D0, O88448, P33173, Q9Z2V5, Q9JHU4, Q8K341	464	128	2629	1.94767	0.00225939	0.000565484	0.000545936
GOTERM_CC_DIRECT	GO:0030424~axon	50	10.2669	3.91688e-05	P55821, P10639, Q61315, P10637, Q68ED2, Q9QYX7, P14873, O08553, O88737, Q14BI2, Q4KUS2, P63042, O89026, Q5SYD0, O70166, P70211, Q9D394, P51830, Q80TR1, Q9WVI9, Q03137, P24529, O88447, P42859, Q8BR86, Q9Z2V5, Q8K341, P54830, Q9JKF6, P28184, G5E8K5, Q61423, Q6P9Q6, Q9JME5, Q8K2Q9, Q9ERR1, O08539, P19246, Q04690, Q9QYS2, P84075, A2ALS5, P33175, P33173, P08553, Q922S4, P60761, P08551, B1AWN6, Q6P069	464	163	2629	1.73802	0.0157385	0.00317267	0.003063
GOTERM_CC_DIRECT	GO:0005829~cytosol	140	28.7474	7.776e-05	Q61037, Q9ES28, P10639, Q07076, Q60864, Q8BKX1, P10637, O35099, O35495, Q9Z2D3, Q6PAJ1, Q5SXA9, Q61036, Q6PAR5, Q8CHG7, O08553, Q8CGE9, P17156, Q8CHG3, P46664, Q5SYD0, Q9Z1S8, Q60598, P30999, Q3U308, Q62418, Q80WT5, P39688, P54227, P46935, P24529, P42859, O88447, P63330, Q8BPQ7, O88448, Q9Z2V5, Q9WVE8, Q6ZPJ3, Q922H1, Q9Z1T6, Q9CZ44, Q9CX00, Q8BRK8, P59764, P35235, Q62188, P56812, P34152, Q8BX70,…	464	606	2629	1.30896	0.0310033	0.0052488	0.00506736
GOTERM_CC_DIRECT	GO:0005856~cytoskeleton	87	17.8645	0.000104206	Q62523, Q61037, A2AHC3, Q61315, Q8BKX1, P10637, Q69ZS8, S4R1M9, Q9Z0H8, Q61792, Q5SW75, Q8C7M3, Q6PER3, P14873, Q9CRB6, O08553, O88737, P17156, Q80U49, A2AWA9, P62715, Q8R1Q8, Q60598, Q6PB44, P28652, Q8BVL9, Q61768, Q91YM2, P70451, P97434, Q62418, Q8R5H6, P70336, P16546, Q9WTQ5, Q8K4G5, P54227, Q9JL04, A2ALU4, O88447, O88448, Q02248, P63330, Q8CJ19, Q9JHU4, Q8K341, Q9WVE8, P59281, Q9WU78, Q9CX00,…	464	342	2629	1.44134	0.0413275	0.00602908	0.00582067
GOTERM_CC_DIRECT	GO:0042995~cell projection	62	12.731	0.000343613	P55821, Q9ES28, P84309, O89032, Q61315, B2RQC6, Q8BKX1, P10637, Q5SXA9, Q8C7M3, Q3UHK6, P14873, Q8CGE9, Q14BI2, P63042, Q9QXJ1, O89026, O35927, Q9ESN9, Q5SSM3, Q91Z67, Q60598, P70290, Q6PB44, Q61644, O70166, Q91YM2, P70451, Q62418, O70161, Q9D394, O88809, Q99P72, Q80TR1, Q03137, O88447, Q8BR86, O55106, Q9Z2V5, Q8K341, Q9JHU2, Q9WVE8, Q69ZI1, Q80TQ2, Q62188, P35831, Q9QXL1, Q8BXT1, Q8BRT1, G5E8K5,…	464	232	2629	1.51418	0.129935	0.0173954	0.0167941
GOTERM_CC_DIRECT	GO:0005886~plasma membrane	164	33.6756	0.00039264	Q9ES28, P84309, Q07076, Q61315, Q8BKX1, Q922J6, P10637, O35495, P70268, Q9Z2D3, Q6PAJ1, Q5SXA9, P59108, Q3UHK6, Q69ZW3, Q8CHG7, Q8CGE9, Q3UJP5, P70704, Q14BI2, Q9QXJ1, Q60902, O89026, P46664, Q9Z1S8, Q60598, Q62415, P30999, Q62418, Q99P72, P39688, Q9WTQ5, P31324, P46935, Q5DQR4, Q03137, Q99N28, P41241, P63330, Q8CJ19, O88444, Q80TF3, Q9JJY3, Q9WVE8, Q8BYA0, Q61016, O54828, Q4VAA2, Q9CZ44, Q7TT50,…	464	752	2629	1.23566	0.147047	0.0176688	0.017058
GOTERM_CC_DIRECT	GO:0031410~cytoplasmic vesicle	52	10.6776	0.000565169	Q69ZS6, P70268, Q8C7M3, Q8R191, P70704, Q8BPN8, Q3UMR0, Q5SYD0, Q9ESN9, Q8BG39, Q925T6, Q91Z67, Q9QZB1, Q6PB44, Q61644, Q62418, Q8K3I4, Q8BYR5, Q9JL04, Q9QY01, O35551, Q80TJ1, P24529, O88447, P42859, Q8BPQ7, Q8BJI1, Q3UGY8, Q6IRU5, Q9WVE8, P60469, Q9Z1T6, Q9CX00, Q80TY0, P80560, Q68FD5, Q80U22, Q3TXX4, Q80XQ2, Q8K012, Q9ERB0, Q60575, Q9JME5, P97411, Q80VP0, Q62277, Q9WV69, Q9JK48, Q6DFV3, Q9QZM0,…	464	189	2629	1.55889	0.204638	0.0221527	0.021387
GOTERM_CC_DIRECT	GO:0045202~synapse	60	12.3203	0.000601679	Q61315, Q69ZS6, Q68ED2, Q6PAJ1, Q80U40, Q8C7M3, Q8R191, Q68ED7, Q9QYX7, Q68FF6, P14873, Q8CHG7, Q8CGE9, O88737, Q8BPN8, Q14BI2, Q4KUS2, Q9QXJ1, Q8BG39, Q925T6, Q80TZ3, Q5SSM3, Q91Z67, Q61644, Q9WVQ1, P30999, Q62418, Q8K3I4, Q8R5H6, Q8BYR5, Q80TR1, O55100, Q8BSS9, Q99MI1, Q9WVI9, Q03137, Q80TJ1, Q02248, Q8BJI1, Q6V4S5, Q9JKF6, P80560, Q3TXX4, Q8C8R3, Q6PH08, P84086, Q80U28, G5E8K5, O70589, Q8JZW5,…	464	227	2629	1.49761	0.216319	0.0221527	0.021387
GOTERM_CC_DIRECT	GO:0030426~growth cone	28	5.74949	0.000735396	Q61037, P55821, Q9ES28, Q61315, P10637, Q62188, Q9QYX7, P14873, O08553, P21107, Q6PH08, P63042, Q9QXJ1, A2A8L5, Q9ESN9, Q60598, P30999, O70166, Q6P9Q6, Q8K2Q9, P70398, Q9D394, Q9EP53, Q80TR1, P63034, O88447, P22682, P08551	464	84	2629	1.88865	0.257658	0.0248196	0.0239616
GOTERM_CC_DIRECT	GO:0005923~bicellular tight junction	13	2.6694	0.00104061	Q8BYA0, Q9WVQ1, Q61315, P30999, Q60771, A2ALU4, Q8CHG7, Q8BIE6, Q02248, Q811D0, G5E8K5, O55106, Q80XP9	464	27	2629	2.72805	0.344047	0.0324189	0.0312983
GOTERM_CC_DIRECT	GO:0048786~presynaptic active zone	10	2.05339	0.00163299	Q99MI1, O88737, Q6PH08, Q4KUS2, Q68ED2, Q3TXX4, Q62277, P60469, Q9QYS2, Q9QYX7	464	18	2629	3.14775	0.48413	0.04724	0.045607
GOTERM_CC_DIRECT	GO:0005881~cytoplasmic microtubule	9	1.84805	0.00299534	Q9QZB1, P68369, Q8CCN5, Q61315, Q80TQ2, Q8BRT1, Q9Z2V5, Q9Z0H8, Q9Z1K7	464	16	2629	3.1871	0.70327	0.0808742	0.0780786
GOTERM_CC_DIRECT	GO:0030425~dendrite	48	9.85626	0.0036532	Q61037, P10639, Q61315, Q8BNA6, P10637, O08529, Q68ED2, Q8C7M3, Q68ED7, Q9QYX7, P14873, O08553, Q8CGE9, O88737, P84086, Q14BI2, Q9QXL1, Q8BXT1, G5E8K5, O35607, O35927, Q9ESN9, Q925T6, O70589, P28652, Q9WVQ1, P97411, Q62418, Q9D394, P70232, O88809, P51830, Q04690, P31324, Q9WVI9, A2ALS5, Q03137, Q62083, P42859, P24529, Q9CQM9, Q8BR86, Q9Z2V5, Q8VDZ4, Q922S4, P60761, Q9QYC0, Q9JHU2	464	185	2629	1.47008	0.772875	0.0924717	0.0892752
GOTERM_CC_DIRECT	GO:0005871~kinesin complex	9	1.84805	0.00480018	Q60575, Q9QXL1, P33175, Q61768, O88447, P33173, O88448, Q9ERR1, P28738	464	17	2629	2.99962	0.857549	0.114357	0.110404
GOTERM_CC_DIRECT	GO:0030027~lamellipodium	24	4.92813	0.00613442	P55821, Q9ES28, Q3UH93, Q60598, Q91Z67, Q69ZI1, Q61315, P30999, Q8K2Q9, P70451, Q62418, Q9D394, Q61140, Q69ZX8, Q62077, Q8R5H6, Q62188, Q9EP53, Q8K4G5, Q02248, P34152, Q9QXJ1, Q64096, Q5SNZ0	464	78	2629	1.74337	0.917263	0.138025	0.133253
GOTERM_CC_DIRECT	GO:0005938~cell cortex	18	3.6961	0.00712631	Q9ES28, Q60598, Q9QZB1, Q61315, P70451, Q80TY0, Q62418, Q68ED2, E9Q8I9, Q9EP53, P46935, Q9DCT8, Q9JL04, A2ALU4, Q02248, Q8BRT1, Q9CQM9, Q8K012	464	53	2629	1.92428	0.944783	0.151903	0.146652
GOTERM_CC_DIRECT	GO:0035253~ciliary rootlet	5	1.02669	0.0105723	P33175, Q61768, O88447, O88448, P28738	464	6	2629	4.72162	0.986494	0.203895	0.196847
GOTERM_CC_DIRECT	GO:0030132~clathrin coat of coated pit	5	1.02669	0.0105723	Q8CHC4, O08585, Q60902, Q68FD5, Q6IRU5	464	6	2629	4.72162	0.986494	0.203895	0.196847
GOTERM_CC_DIRECT	GO:0043195~terminal bouton	19	3.90144	0.0121201	Q61644, B2RQC6, Q68FD5, P80560, Q64332, Q68ED2, Q8VD37, Q62277, Q9QYX7, O55100, Q8CHC4, O08553, Q6PH08, P84086, Q4KUS2, P24529, P63330, Q8BG39, Q9ERB0	464	60	2629	1.79422	0.992836	0.215712	0.208255
GOTERM_CC_DIRECT	GO:0042734~presynaptic membrane	15	3.08008	0.0122503	O70589, Q9JKF6, Q68ED2, Q8BYR5, Q62277, Q9QYS2, Q80TR1, Q6PH08, Q14BI2, Q4KUS2, Q62083, Q811D0, Q9QXJ1, Q922S4, E9Q7X7	464	43	2629	1.97649	0.993208	0.215712	0.208255
GOTERM_CC_DIRECT	GO:0005875~microtubule associated complex	8	1.64271	0.0133376	Q60575, Q8K2Q9, Q8K2I1, P10637, Q9ERR1, Q9Z2V5, Q62048, P14873	464	16	2629	2.83297	0.995652	0.22179	0.214123
GOTERM_CC_DIRECT	GO:0014069~postsynaptic density	37	7.59754	0.0136907	Q8BKX1, P10637, Q62261, P28184, Q6PAJ1, Q9QYX7, P14873, Q8C8R3, O88737, Q6PH08, O35607, O35927, Q80TZ3, Q91Z67, Q9QZB1, P28652, Q9WVQ1, Q8JZW5, Q62418, Q64332, P19246, Q99P72, P39688, Q04690, Q9WV69, Q8K4G5, Q9QYS2, Q80TR1, Q03137, Q62083, P42859, Q811D0, P63330, P08553, O55106, P60761, Q9QYC0	464	144	2629	1.45583	0.996239	0.22179	0.214123
GOTERM_CC_DIRECT	GO:0033268~node of Ranvier	5	1.02669	0.0212635	Q811D0, G5E8K5, Q9Z351, O08539, B1AWN6	464	7	2629	4.04711	0.999834	0.323319	0.312143
GOTERM_CC_DIRECT	GO:0031594~neuromuscular junction	10	2.05339	0.0215546	O55100, Q6PHZ2, Q4KUS2, Q03137, Q811D0, G5E8K5, P08553, Q8R191, Q9QYX7, Q69ZS0	464	25	2629	2.26638	0.999853	0.323319	0.312143
GOTERM_CC_DIRECT	GO:0005622~intracellular	77	15.8111	0.0226929	Q9ES28, P84309, Q69ZS7, Q5SSL4, Q9R0P5, Q6PAJ1, Q8C7M3, Q9JIL5, P61460, Q8CHG7, Q91YE6, Q14BI2, Q4KUS2, Q8CHG3, A2AWA9, O88811, Q9ERL9, Q8CIQ7, Q9DB75, P97393, Q9Z1S8, P70290, P97950, Q91YM2, P70297, Q62418, Q8BYN5, Q80WT5, O88809, P70336, Q99P72, P51830, Q9WTQ5, Q80TR1, P54227, O35954, Q5SRX1, Q8BPQ7, Q9QZK2, O88444, Q8BIK4, Q8BM65, Q9WUT3, O54828, Q62426, Q9Z1T6, Q7TT50, Q9JKB1, Q8BXK8, O08529,…	464	352	2629	1.23943	0.999908	0.328237	0.316891
GOTERM_CC_DIRECT	GO:0005912~adherens junction	7	1.43737	0.0346938	Q8BYA0, Q9QZQ1, Q61315, Q02248, Q9JKF6, O35927, Q80XP9	464	15	2629	2.64411	0.999999	0.469152	0.452935
GOTERM_CC_DIRECT	GO:0016023~cytoplasmic, membrane-bounded vesicle	14	2.87474	0.034752	Q6PB44, Q9QZB1, Q9CX00, Q80TY0, P70268, Q8BYR5, Q9WV69, O88447, O08585, P42859, Q9ESN9, Q8K012, Q925T6, Q5SNZ0	464	44	2629	1.8028	0.999999	0.469152	0.452935
GOTERM_CC_DIRECT	GO:0005802~trans-Golgi network	15	3.08008	0.0382127	Q9QZB1, Q61644, Q3UVL4, Q9JME5, Q80TY0, Q9EPN1, G3X9K3, Q9QYX7, O88737, P70704, Q8CHG3, Q8BRT1, Q6IRU5, Q8K012, Q9WVE8	464	49	2629	1.73447	1	0.499231	0.481974
GOTERM_CC_DIRECT	GO:0030118~clathrin coat	4	0.821355	0.0410537	Q8CHC4, O08585, Q68FD5, Q6IRU5	464	5	2629	4.53276	1	0.519585	0.501624
GOTERM_CC_DIRECT	GO:0030659~cytoplasmic vesicle membrane	13	2.6694	0.0446125	Q60575, Q61644, Q9Z1T6, Q8BYR5, Q9QY01, Q9JL04, Q6DFV3, Q80TJ1, P42859, P24529, Q8BPQ7, Q3UMR0, Q9WVE8	464	41	2629	1.79652	1	0.547517	0.52859
GOTERM_CC_DIRECT	GO:0030315~T-tubule	9	1.84805	0.0465932	Q8R3Z5, Q8C8R3, Q6PHZ2, Q811D0, Q68FD5, G5E8K5, O08539, B1AWN6, Q6P069	464	24	2629	2.12473	1	0.555007	0.535822
GOTERM_CC_DIRECT	GO:0043234~protein complex	46	9.44559	0.0494384	Q61037, Q9ES28, Q60864, Q61315, Q6PHZ2, B2RQC6, Q62261, Q68FD5, Q8BRK8, P35235, P70268, Q6PAJ1, Q5SXA9, Q68ED2, Q61696, Q8CHC4, O08553, Q8CHG7, Q8CGE9, Q6PH08, Q4KUS2, Q61081, Q9QXJ1, Q9D1F4, B2RUJ5, Q9ERL9, Q9Z1S8, O70589, Q9WVQ1, Q8K2I1, P26450, Q3U308, Q99P72, P16546, Q04690, Q9EP53, Q62277, Q9JK48, Q62083, P42859, O88448, Q02248, Q9Z351, Q9Z2V5, O55106, E9Q7X7	464	203	2629	1.28391	1	0.572073	0.552297
GOTERM_CC_DIRECT	GO:0033270~paranode region of axon	5	1.02669	0.0570678	Q811D0, G5E8K5, P20917, B1AWN6, P16546	464	9	2629	3.14775	1	0.624661	0.603068
GOTERM_CC_DIRECT	GO:0043194~axon initial segment	5	1.02669	0.0570678	Q6PHZ2, G5E8K5, Q9Z351, O08539, B1AWN6	464	9	2629	3.14775	1	0.624661	0.603068
GOTERM_CC_DIRECT	GO:0016342~catenin complex	4	0.821355	0.071535	Q61315, Q02248, Q9JKF6, Q9Z1K7	464	6	2629	3.7773	1	0.742863	0.717184
GOTERM_CC_DIRECT	GO:0005883~neurofilament	4	0.821355	0.071535	P46660, P08553, P08551, P19246	464	6	2629	3.7773	1	0.742863	0.717184
GOTERM_CC_DIRECT	GO:0030672~synaptic vesicle membrane	11	2.25873	0.0737841	O55100, Q8BPN8, Q69ZS6, P97411, P80560, Q64332, Q8BJI1, Q3TXX4, Q62277, Q8R191, Q8BG39	464	35	2629	1.78073	1	0.747064	0.721239
GOTERM_CC_DIRECT	GO:0033596~TSC1-TSC2 complex	3	0.616016	0.0820151	Q61037, P08551, Q9EP53	464	3	2629	5.66595	1	0.785978	0.758809
GOTERM_CC_DIRECT	GO:0030673~axolemma	5	1.02669	0.08227	Q7TPD3, Q62261, O89026, Q5SYD0, Q9ESN9	464	10	2629	2.83297	1	0.785978	0.758809
GOTERM_CC_DIRECT	GO:0016328~lateral plasma membrane	6	1.23203	0.0834495	Q8BYA0, Q61315, Q02248, Q811D0, G5E8K5, P16546	464	14	2629	2.42826	1	0.785978	0.758809
GOTERM_CC_DIRECT	GO:0043204~perikaryon	14	2.87474	0.0992998	P54830, P28652, Q8K2Q9, Q9D394, P19246, Q8CA95, P14873, P84075, Q03137, P24529, Q8BXT1, P08553, Q9Z2V5, O35927	464	51	2629	1.55536	1	0.91401	0.882414

## Sheet: somatic_nuclear
Category	Term	Count	%	PValue	Genes	List Total	Pop Hits	Pop Total	Fold Enrichment	Bonferroni	Benjamini	FDR
GOTERM_CC_DIRECT	GO:0030529~intracellular ribonucleoprotein complex	76	25.4181	7.18585e-42	P09405, P62717, O70133, Q60668, P62281, P32067, P12970, P14115, Q61990, P57722, Q99N84, Q9JIH2, Q6P4T2, P62751, P35980, Q6DFW4, O09167, P62911, P47911, P63325, P62754, Q9Z204, P97351, P14206, Q62376, P35922, Q9CPR4, Q9WV02, P62242, O55142, P14131, O88569, P61358, P60867, Q9Z1X4, Q9CZM2, Q9CX86, Q8VE22, Q91VR5, Q61656, Q9D0G0, Q921F4, Q8CCS6, Q8VDM6, Q8VEK3, Q62189, Q61937, Q9CQF0, P61979, P49312,…	296	127	2629	5.31507	2.24199e-39	2.24199e-39	2.06234e-39
GOTERM_CC_DIRECT	GO:0005634~nucleus	206	68.8963	3.54112e-34	Q5SWP3, P06537, Q8BTI8, O70133, Q9CXS4, Q6PDG5, Q64152, Q52KI8, Q9Z2D6, P63325, Q569Z5, P97470, Q9CR59, Q8VH51, P97351, Q99KV1, P61957, A2AQ19, P62806, Q04750, Q8CCT4, Q9CPR4, P62242, Q4VA53, Q9JKS5, O88569, Q7TNC4, Q8R010, Q9Z130, Q9DB20, Q921F2, Q91VR5, Q61656, P48036, Q6DIC0, Q921F4, Q91W39, Q8CCS6, Q99K48, Q8VDM6, P15105, Q62189, Q9DBR1, Q9CRD2, Q9WU42, O89086, Q61545, P61979, Q9CQR4, Q3TEA8,…	296	964	2629	1.89797	1.10483e-31	5.52415e-32	5.08151e-32
GOTERM_CC_DIRECT	GO:0005654~nucleoplasm	118	39.4649	1.75192e-31	P09405, P06537, O70133, Q9CXS4, Q91YR7, Q9Z0H3, P97868, Q9JIH2, Q6PDG5, Q99MR6, Q52KI8, A2BH40, Q60749, Q8BU30, Q8VH51, P70372, O88291, P62806, Q6PFD9, Q04750, Q62376, Q6PDQ2, P35922, Q4VA53, Q9JKS5, Q80XN0, O88569, P48678, Q9Z130, Q9R1C7, Q9CX86, Q61136, Q921F2, Q8CCK0, Q99NB9, Q91VR5, Q61656, Q6DIC0, Q99K48, Q8VDM6, Q61937, Q00PI9, Q9WU42, O89086, P61979, Q9Z2W9, Q6PE01, Q8R081, Q9QX47, Q8C2Q3,…	296	374	2629	2.80227	5.46599e-29	1.822e-29	1.676e-29
GOTERM_CC_DIRECT	GO:0005681~spliceosomal complex	37	12.3746	1.33801e-28	Q9Z315, Q61136, Q99NB9, Q8JZX4, Q61656, Q9Z1N5, Q8BTI8, Q91YR7, O35691, Q8VEK3, Q62189, Q91YE7, Q6P4T2, O35841, Q52KI8, Q8K4Z5, Q91Z31, Q9Z204, P61979, P49312, O88291, Q6PDM2, O35286, Q7TMK9, Q64012, Q64213, Q8VDP4, Q62376, Q9WV02, O08810, Q6PE01, Q99PV0, O88569, Q9D0E1, Q8BG05, Q921M3, P26369	296	43	2629	7.64244	4.17459e-26	1.04365e-26	9.60022e-27
GOTERM_CC_DIRECT	GO:0005840~ribosome	41	13.7124	1.70477e-20	Q8VE22, Q6ZWV3, P62717, Q9D0G0, P62281, P14115, P12970, Q99N84, P47915, P62751, P35980, O09167, P62855, P62911, Q9CQF0, P47911, P63325, P62754, Q99PL5, P97351, Q9CZX8, Q9D1R9, P14206, P14148, Q9CPR4, P62264, P62242, O55142, P14131, Q6ZWN5, P62267, Q9D8E6, P47962, P61358, P62702, P62900, P47963, Q8BP67, P60867, P41105, Q9CZM2	296	73	2629	4.98838	5.31887e-18	1.06377e-18	9.78535e-19
GOTERM_CC_DIRECT	GO:0071013~catalytic step 2 spliceosome	26	8.69565	2.67667e-19	Q9Z315, Q61136, Q99NB9, Q61656, Q8BTI8, Q91YR7, O35691, Q8VEK3, Q6P4T2, Q52KI8, Q8K4Z5, Q9Z204, P61979, P49312, Q91VM5, Q6PDM2, Q7TMK9, Q64012, Q9WV02, O08810, Q6PE01, Q99PV0, O88569, Q9D0E1, Q8BG05, Q921M3	296	31	2629	7.44922	8.35122e-17	1.39187e-17	1.28034e-17
GOTERM_CC_DIRECT	GO:0016607~nuclear speck	29	9.699	2.30044e-17	Q921F2, Q9Z1N5, Q8BTI8, Q91YR7, Q8CCS6, Q99K48, O35691, Q99MU3, Q62167, O35326, Q0VBL3, Q52KI8, P84104, Q810A7, Q61937, Q569Z5, Q8R326, Q6PDM2, Q3TWW8, Q8VHR5, Q62376, O08810, Q61464, Q99PV0, Q9QX47, Q7TNC4, Q9R1C7, Q8CFN5, P26369	296	43	2629	5.99002	7.17737e-15	1.02534e-15	9.4318e-16
GOTERM_CC_DIRECT	GO:0005730~nucleolus	56	18.7291	4.34315e-17	P09405, P10711, O70133, P62281, P12970, P97868, Q9Z0H3, Q6P5B0, O35326, P35980, Q6DFW4, O09167, Q9D0L8, P47911, P63325, P20357, P62754, P97351, P60824, A2AQ19, Q99ME9, Q9D1R9, Q04750, O35286, Q9D0T1, P35922, Q9JIK5, Q64511, P50544, Q3TKT4, Q91ZW3, Q9Z1X4, Q61656, Q501J6, Q99K48, Q99MU3, P62855, Q61937, Q9DBR1, Q8R326, O89086, Q61545, Q9CZX8, Q62318, E9Q5C9, P14148, Q9ESX4, P62264, O08784, Q6ZWN5,…	296	153	2629	3.25084	1.35506e-14	1.69383e-15	1.5581e-15
GOTERM_CC_DIRECT	GO:0022625~cytosolic large ribosomal subunit	24	8.02676	2.0932e-15	Q6ZWV3, P62717, Q9D1R9, P12970, P14115, P14148, Q9CPR4, Q9ESX4, P47915, O55142, P62751, P35980, Q9D8E6, O09167, P61358, P47962, Q6ZWV7, P62911, P62900, P47963, Q8BP67, P47911, P41105, Q9CZM2	296	33	2629	6.45946	6.5814e-13	7.25643e-14	6.67498e-14
GOTERM_CC_DIRECT	GO:0016363~nuclear matrix	17	5.68562	4.82878e-08	Q9WU42, Q99NB9, Q9Z1N5, E9Q7G0, O88291, Q99K48, P14733, O35381, Q8CJF7, Q8VIJ6, Q52KI8, Q61937, P48678, Q9R1C7, Q9D0E1, Q8K310, Q8R326	296	32	2629	4.71843	1.50657e-05	1.50658e-06	1.38586e-06
GOTERM_CC_DIRECT	GO:0022627~cytosolic small ribosomal subunit	15	5.01672	6.04594e-07	P97351, Q9CZX8, P62281, P14206, Q62167, P62264, P62242, Q6ZWN5, P14131, P62267, P62855, P62702, P60867, P63325, P62754	296	29	2629	4.59401	0.000188616	1.71485e-05	1.57744e-05
GOTERM_CC_DIRECT	GO:0000790~nuclear chromatin	14	4.68227	9.31871e-07	Q9WU42, Q9Z204, Q8CCK0, P61979, Q6DIC0, Q8VHR5, Q9Z0H3, Q8VDP4, Q6PDQ2, Q6PDG5, Q9Z2D6, Q3TKT4, A2BH40, Q9R190	296	26	2629	4.78248	0.000290702	2.42286e-05	2.22872e-05
GOTERM_CC_DIRECT	GO:0019013~viral nucleocapsid	9	3.01003	2.8023e-06	P61979, P49312, Q60668, O88569, Q8VEK3, Q99020, Q62376, Q8BG05, P26369	296	11	2629	7.26689	0.000873938	6.72553e-05	6.18662e-05
GOTERM_CC_DIRECT	GO:0071565~nBAF complex	6	2.00669	9.40162e-05	Q6PDG5, Q6DIC0, E9Q4N7, Q3TKT4, A2BH40, Q9Z0H3	296	6	2629	8.88176	0.0289084	0.00183332	0.00168642
GOTERM_CC_DIRECT	GO:0016514~SWI/SNF complex	6	2.00669	9.40162e-05	Q6PDG5, Q6DIC0, E9Q4N7, Q3TKT4, A2BH40, Q9Z0H3	296	6	2629	8.88176	0.0289084	0.00183332	0.00168642
GOTERM_CC_DIRECT	GO:0090544~BAF-type complex	6	2.00669	9.40162e-05	Q6PDG5, Q6DIC0, E9Q4N7, Q3TKT4, A2BH40, Q9Z0H3	296	6	2629	8.88176	0.0289084	0.00183332	0.00168642
GOTERM_CC_DIRECT	GO:0015030~Cajal body	7	2.34114	0.000119051	Q9Z315, Q8BTI8, Q6DFW4, Q810A7, E9Q5C9, O08810, Q569Z5	296	9	2629	6.90803	0.0364645	0.00218493	0.00200985
GOTERM_CC_DIRECT	GO:0071004~U2-type prespliceosome	6	2.00669	0.000298829	Q99NB9, Q7TNC4, Q9R1C7, Q8K4Z5, Q62376, P26369	296	7	2629	7.61293	0.089033	0.00517971	0.00476467
GOTERM_CC_DIRECT	GO:0005844~polysome	10	3.34448	0.00033012	P62702, P56959, P14148, P35922, Q9CPR4, O70305, Q61584, Q9WVR4, Q9JII5, P62754	296	22	2629	4.03716	0.0978862	0.00542092	0.00498655
GOTERM_CC_DIRECT	GO:0000785~chromatin	9	3.01003	0.000364677	Q9WU42, Q4VA53, Q8CCK0, Q8CJF7, Q99NB9, Q8VIJ6, Q61029, Q62318, O88569	296	18	2629	4.44088	0.107564	0.00568897	0.00523312
GOTERM_CC_DIRECT	GO:0015935~small ribosomal subunit	9	3.01003	0.000569279	P14131, Q6ZWN5, P62267, P62855, Q61937, P62702, P14206, P60867, P62754	296	19	2629	4.20715	0.162778	0.00845786	0.00778015
GOTERM_CC_DIRECT	GO:0042382~paraspeckles	5	1.67224	0.000709394	Q8VIJ6, Q9CQF3, Q99K48, Q9D0E1, Q8R326	296	5	2629	8.88176	0.198611	0.00922212	0.00848317
GOTERM_CC_DIRECT	GO:0071564~npBAF complex	5	1.67224	0.000709394	Q6PDG5, Q6DIC0, Q3TKT4, A2BH40, Q9Z0H3	296	5	2629	8.88176	0.198611	0.00922212	0.00848317
GOTERM_CC_DIRECT	GO:0015934~large ribosomal subunit	5	1.67224	0.000709394	O89086, Q9D8E6, Q61937, P14115, Q9CPR4	296	5	2629	8.88176	0.198611	0.00922212	0.00848317
GOTERM_CC_DIRECT	GO:0005694~chromosome	15	5.01672	0.000805887	Q61136, Q8CCK0, Q61029, Q3TEA8, Q9CXS4, Q04750, Q6P5D8, P70399, P35922, P97868, F6ZDS4, Q64511, Q8CJF7, O88532, Q9WVA3	296	50	2629	2.66453	0.222396	0.00971273	0.00893446
GOTERM_CC_DIRECT	GO:0031012~extracellular matrix	19	6.35452	0.000809394	Q61656, P61979, Q9CZX8, P62806, Q8VEK3, P62281, P14206, O08810, P62264, O55142, P14131, Q8VIJ6, Q8BMK4, P61358, P48678, Q9D0E1, P60867, P63325, Q9DB20	296	73	2629	2.31169	0.223247	0.00971273	0.00893446
GOTERM_CC_DIRECT	GO:0036464~cytoplasmic ribonucleoprotein granule	9	3.01003	0.0012524	P09405, O70133, P62702, Q8VEK3, P47911, P35922, Q62167, P41105, P62754	296	21	2629	3.80647	0.323615	0.0144722	0.0133125
GOTERM_CC_DIRECT	GO:0010494~cytoplasmic stress granule	7	2.34114	0.00260494	P70318, Q91VR5, P60824, Q3U0V1, P35922, O70305, Q62167	296	14	2629	4.44088	0.55683	0.0289419	0.0266228
GOTERM_CC_DIRECT	GO:0005637~nuclear inner membrane	6	2.00669	0.00269011	Q61029, P21619, Q921T2, Q5XG69, P14733, P62996	296	10	2629	5.32905	0.568481	0.0289419	0.0266228
GOTERM_CC_DIRECT	GO:0042405~nuclear inclusion body	4	1.33779	0.0117693	Q9ERU9, Q6PFD9, Q8CCS6, F6ZDS4	296	5	2629	7.10541	0.975123	0.111274	0.102357
GOTERM_CC_DIRECT	GO:0071011~precatalytic spliceosome	4	1.33779	0.0117693	Q9QX47, Q9D0T1, Q62376, Q6PE01	296	5	2629	7.10541	0.975123	0.111274	0.102357
GOTERM_CC_DIRECT	GO:0005685~U1 snRNP	4	1.33779	0.0117693	Q7TNC4, Q9R1C7, Q62376, Q62189	296	5	2629	7.10541	0.975123	0.111274	0.102357
GOTERM_CC_DIRECT	GO:0005682~U5 snRNP	4	1.33779	0.0117693	Q6P4T2, Q91YR7, Q6PE01, Q99PV0	296	5	2629	7.10541	0.975123	0.111274	0.102357
GOTERM_CC_DIRECT	GO:0031965~nuclear membrane	13	4.34783	0.0162853	Q8VE22, Q61029, Q9ERU9, Q6PFD9, Q99ME9, Q9Z1Q5, Q9QY81, P14733, F6ZDS4, Q6P5B0, Q9JIH2, Q8CJF7, P48678	296	55	2629	2.09932	0.994041	0.149441	0.137467
GOTERM_CC_DIRECT	GO:0090575~RNA polymerase II transcription factor complex	4	1.33779	0.0215985	Q8VIJ6, Q62318, Q99K48, Q99020	296	6	2629	5.92117	0.9989	0.192535	0.177108
GOTERM_CC_DIRECT	GO:0005635~nuclear envelope	12	4.01338	0.0228376	Q61029, P21619, Q9ERU9, Q921T2, Q9Z1Q5, Q6PFD9, Q9QY81, P48678, P14733, Q922Q8, F6ZDS4, Q8K4B0	296	51	2629	2.08983	0.999259	0.197926	0.182066
GOTERM_CC_DIRECT	GO:0005643~nuclear pore	6	2.00669	0.0264501	Q8CJF7, Q9ERU9, Q6PFD9, Q9QY81, F6ZDS4, Q9JIH2	296	16	2629	3.33066	0.999767	0.216263	0.198935
GOTERM_CC_DIRECT	GO:0031672~A band	5	1.67224	0.0270329	Q9D8E6, P47911, P14148, Q9CPR4, Q9CZM2	296	11	2629	4.03716	0.999807	0.216263	0.198935
GOTERM_CC_DIRECT	GO:0000784~nuclear chromosome, telomeric region	5	1.67224	0.0270329	Q8CCK0, P62806, Q6P5D8, P70399, P32067	296	11	2629	4.03716	0.999807	0.216263	0.198935
GOTERM_CC_DIRECT	GO:0022626~cytosolic ribosome	4	1.33779	0.034701	P47915, P47962, Q8BP67, P14115	296	7	2629	5.07529	0.999984	0.252933	0.232666
GOTERM_CC_DIRECT	GO:0016581~NuRD complex	4	1.33779	0.034701	Q8VHR5, Q6PDQ2, Q8K4B0, Q9R190	296	7	2629	5.07529	0.999984	0.252933	0.232666
GOTERM_CC_DIRECT	GO:0005638~lamin filament	3	1.00334	0.0348593	P21619, P48678, P14733	296	3	2629	8.88176	0.999984	0.252933	0.232666
GOTERM_CC_DIRECT	GO:0044615~nuclear pore nuclear basket	3	1.00334	0.0348593	Q9ERU9, Q6PFD9, F6ZDS4	296	3	2629	8.88176	0.999984	0.252933	0.232666
GOTERM_CC_DIRECT	GO:0044530~supraspliceosomal complex	3	1.00334	0.0645852	Q91VM5, Q99MU3, Q9WV02	296	4	2629	6.66132	1	0.411237	0.378285
GOTERM_CC_DIRECT	GO:0005689~U12-type spliceosomal complex	3	1.00334	0.0645852	Q99NB9, O35286, Q921M3	296	4	2629	6.66132	1	0.411237	0.378285
GOTERM_CC_DIRECT	GO:0001651~dense fibrillar component	3	1.00334	0.0645852	P09405, Q04750, Q9D0T1	296	4	2629	6.66132	1	0.411237	0.378285
GOTERM_CC_DIRECT	GO:0035770~ribonucleoprotein granule	3	1.00334	0.0645852	Q61584, Q8R081, Q8BG05	296	4	2629	6.66132	1	0.411237	0.378285
GOTERM_CC_DIRECT	GO:0046540~U4/U6 x U5 tri-snRNP complex	3	1.00334	0.0645852	Q9Z315, Q91YR7, Q9D0T1	296	4	2629	6.66132	1	0.411237	0.378285
GOTERM_CC_DIRECT	GO:0070937~CRD-mediated mRNA stability complex	3	1.00334	0.0645852	O70133, Q8VEK3, Q7TMK9	296	4	2629	6.66132	1	0.411237	0.378285
GOTERM_CC_DIRECT	GO:0000228~nuclear chromosome	3	1.00334	0.0997958	P62806, Q04750, Q9Z0H3	296	5	2629	5.32905	1	0.576598	0.530396
GOTERM_CC_DIRECT	GO:0072669~tRNA-splicing ligase complex	3	1.00334	0.0997958	Q9CQE8, Q91VR5, Q80VD1	296	5	2629	5.32905	1	0.576598	0.530396
GOTERM_CC_DIRECT	GO:0030532~small nuclear ribonucleoprotein complex	3	1.00334	0.0997958	Q99NB9, E9Q5C9, Q99PV0	296	5	2629	5.32905	1	0.576598	0.530396
GOTERM_CC_DIRECT	GO:0017146~NMDA selective glutamate receptor complex	3	1.00334	0.0997958	P35438, D3YZU1, Q01097	296	5	2629	5.32905	1	0.576598	0.530396
GOTERM_CC_DIRECT	GO:0043083~synaptic cleft	3	1.00334	0.0997958	Q9Z2W9, P35438, Q01097	296	5	2629	5.32905	1	0.576598	0.530396
