# Supplementary material for: Dynamic proteomic and phosphoproteomic atlas of corticostriatal axons in neurodevelopment
Source: eLife. 2022 Oct 14;11:e78847. doi: 10.7554/eLife.78847 (PMC9629834; doi:10.7554/eLife.78847)
Supplement: Supplementary file 7. [file elife-78847-supp7.xlsx]

## Sheet: protein_clusters
Protein	cluster	Gene Symbol	padjust	plex1.neonate1	plex1.neonate2	plex2.neonate3	plex2.neonate4	plex2.neonate5	plex1.earlypostnatal1	plex1.earlypostnatal2	plex1.earlypostnatal3	plex2.earlypostnatal4	plex2.earlypostnatal5	plex1.preweanling1	plex1.preweanling2	plex2.preweanling3	plex2.preweanling4	plex2.preweanling5	plex1.adult1	plex1.adult2	plex1.adult3	plex2.adult4	plex2.adult5
A2A5R2	1	Arfgef2	0.00142497	3.65432	4.03904	4.07024	3.33733	3.14998	4.38579	4.05882	4.75834	4.76036	4.34926	4.15185	4.28554	4.80923	4.83519	5.11025	5.119	4.8988	4.11341	5.2948	4.94662
A2A690	2	Tanc2	0.000279988	9.25012	9.52552	9.32088	9.37827	9.42121	9.72647	9.67134	9.74291	9.98355	10.0652	9.67721	9.8321	9.50305	9.7272	9.5944	9.21656	9.50903	9.44365	9.43632	9.52883
A2A699	3	Fam171a2	0.000140313	6.31745	6.62556	6.07112	5.81662	6.08048	5.94783	5.76275	5.43044	5.95486	6.1513	5.82645	5.65299	5.05129	5.35394	5.36155	5.02565	5.28445	5.29805	4.76272	5.14535
A2A8L5	4	Ptprf	1.52195e-08	6.8705	6.62637	6.7054	6.6001	6.76578	6.70023	6.94563	6.99675	6.86587	6.82065	6.27851	6.03674	5.92427	6.51637	6.36124	5.54058	5.66775	5.34708	5.61428	5.45461
A2A8Z1	3	Osbpl9	0.000163794	6.51513	6.66572	6.51756	6.16383	6.60268	6.20069	6.2227	5.60325	6.52757	6.58814	5.93946	6.17777	5.70991	6.00059	5.88944	5.43899	5.65084	5.46354	5.58202	5.64415
A2AAE1	5	Kiaa1109	0.000162845	6.80339	6.93699	7.01275	6.67539	7.05221	7.37055	7.36133	7.52782	7.50192	7.3879	7.43064	7.36559	7.2475	7.34543	7.17695	7.48222	7.75347	7.3745	7.26108	7.19451
A2AAY5	4	Sh3pxd2b	8.55531e-09	8.2339	8.27689	7.94046	8.39121	8.50436	7.50359	7.42551	7.23376	7.9408	8.06205	6.70904	6.50815	6.43251	6.71708	6.26831	4.97269	5.46293	5.42239	4.12719	5.08044
A2ADY9	6	Ddi2	0.000251568	3.08119	3.8219	3.97062	3.97619	4.64511	3.84367	3.55021	3.81002	3.84978	3.87227	4.33143	4.84104	4.14813	4.43931	4.32169	4.74195	5.06177	4.8726	4.82913	5.0661
A2AFR3	4	Frmpd4	2.89907e-05	5.01156	4.93071	4.62098	4.73001	3.73858	5.31592	5.15998	4.74108	5.38972	5.41411	4.60389	4.4634	4.37872	4.48288	4.45586	3.3508	3.30789	3.54209	3.53567	4.16967
A2AG50	5	Map7d2	3.9419e-07	7.48825	7.67979	8.24526	7.6601	7.39207	8.95003	8.8009	9.47132	9.37669	9.36376	9.08834	9.7548	9.98353	9.52591	9.7782	8.99659	9.59161	9.27677	9.39548	9.48173
A2AGT5	4	Ckap5	6.04336e-05	9.17008	9.08073	8.85207	8.99118	8.76712	8.89958	9.1259	9.11167	9.14019	8.89964	8.51352	8.28074	8.66082	8.74921	8.69459	8.35462	8.56981	8.13686	8.54354	8.43993
A2AHC3	4	Camsap1	2.19689e-06	8.97422	8.83287	8.75012	8.55298	8.35087	8.95984	9.089	9.09876	9.4857	9.19788	8.74608	8.69963	8.69349	8.92214	8.82751	7.97859	8.30602	7.94967	8.08769	8.15543
A2AJA9	5	Ajm1	1.26942e-06	3.78237	5.19913	5.05395	4.55602	5.10025	5.60775	5.37192	5.63427	5.85102	6.21352	6.37226	6.56685	6.61409	6.57623	6.4135	6.43068	6.84473	6.84365	7.04496	7.07764
A2AJI0	7	Map7d1	0.216979	6.83304	7.11992	7.09852	7.12188	7.09679	6.65081	6.44678	6.50385	7.25362	7.12059	6.73168	7.6629	7.12067	7.31322	7.16091	6.61423	7.24454	7.55105	7.22319	7.14713
A2ALS5	5	Rap1gap	5.26659e-09	8.45639	8.81535	8.9373	8.57143	8.53239	9.5289	9.48859	9.61742	9.61901	9.63134	9.78345	9.76182	10.1377	9.99596	10.112	9.92856	9.97034	9.86926	10.009	9.92888
A2ALU4	4	Shroom2	9.35887e-08	8.54377	8.45001	8.43428	8.29298	8.4882	8.45842	8.4428	8.24484	8.78003	8.78403	7.75655	7.57009	7.81089	7.65293	7.44088	7.35919	7.68999	7.22385	7.12278	7.20157
A2AN08	4	Ubr4	1.17489e-05	8.30717	8.59522	8.43732	8.31916	8.24483	8.48832	8.42418	8.50414	8.73885	8.67131	8.42172	8.66358	8.47099	8.51258	8.38615	7.53243	8.04154	7.95802	7.8841	7.92395
A2AP18	5	Plch2	5.28143e-05	6.16971	6.12777	6.34286	6.69013	6.57727	6.64096	6.58917	6.46446	6.86089	6.86555	6.64245	7.28756	7.02289	6.96351	6.94187	7.30658	7.66597	7.34016	7.12162	7.2076
A2APV2	4	Fmnl2	5.47146e-09	8.48257	7.9019	7.84881	7.97691	8.02733	7.35279	7.28536	7.17127	7.38797	7.48487	6.98192	6.94193	7.05271	6.81563	6.72447	6.42637	6.43311	6.35384	6.32053	6.58295
A2AQ25	5	Skt	3.05121e-09	6.7905	6.99383	7.62213	7.31335	7.42709	8.19525	8.24742	8.99888	8.47974	8.64505	9.2815	9.3343	9.37309	9.61069	9.52613	9.71396	9.85884	9.60598	9.94743	9.88929
A2AR50	3	Ralgps1	1.24164e-05	5.30122	6.27387	5.15013	5.11284	5.84552	5.47428	5.16791	4.74667	5.41986	5.48321	5.11839	5.11937	4.47982	4.70836	4.41089	3.38137	3.83769	4.01323	3.26694	3.95442
A2AWA9	8	Rabgap1	1.09654e-05	8.47623	8.45058	8.42319	8.27128	8.1827	8.5698	8.67482	8.74043	8.6257	8.63674	8.40956	8.39308	8.39173	8.51832	8.45228	8.0642	8.32514	8.04617	8.16701	8.18832
A2CG49	4	Kalrn	7.01066e-08	8.59756	8.67719	8.37035	8.4279	8.10593	8.82534	8.83641	8.96068	9.06637	8.97438	8.52462	8.40124	8.50974	8.77191	8.53145	7.62654	7.86635	7.62949	7.78681	7.78622
A2RSJ4	5	Uhrf1bp1l	9.33913e-09	6.73341	7.09232	7.46884	7.29739	7.1811	8.2042	8.09672	8.19059	8.28386	8.50869	8.6761	8.71787	8.53576	8.7218	8.6594	8.33689	8.50713	8.41527	8.41763	8.34089
A2RT62	5	Fbxl16	2.72683e-08	5.15222	5.41564	6.09567	5.26086	5.18481	6.62867	6.76098	6.83935	6.76441	6.96969	7.28397	6.97391	7.54685	7.33779	7.62186	7.62579	7.59633	7.19127	7.78441	7.74077
A2TJV2	2	Palm3	0.0289767	3.55834	4.27016	4.88905	5.02333	5.25429	5.2384	5.12261	5.05077	5.74707	5.54114	4.75356	5.17177	4.62786	4.94228	4.94619	4.44454	4.69135	4.94921	4.13741	4.08007
A6H6A9	4	Rabgap1l	0.00331655	5.01983	5.34954	5.28341	5.2196	4.96398	5.14076	5.58048	5.83902	5.52115	5.5149	4.9806	4.29233	5.14046	5.28878	5.15951	4.48921	4.7999	4.45326	4.84289	5.01818
B0V2N1	8	Ptprs	5.78162e-05	6.95269	6.93639	6.95754	6.85334	6.94413	7.32842	7.46836	7.37428	7.4229	7.43896	7.26851	6.95492	6.9992	7.39835	7.16669	6.91524	7.08449	7.07705	7.15047	7.1137
B1AWN6	5	Scn2a	1.44542e-08	6.7449	7.02932	7.51363	7.24457	6.94779	8.28263	8.13906	8.41437	8.60876	8.72177	8.6083	8.74684	8.7535	8.96591	8.72364	8.7606	9.06975	8.8482	9.19105	9.1497
B1AY13	4	Usp24	1.29728e-05	7.62058	7.64987	7.47484	7.41936	7.31989	7.63396	8.04268	8.07274	8.07574	7.85858	7.27835	7.10215	7.46393	7.48439	7.22208	7.18525	7.1524	6.93041	7.28846	7.24167
B1AZP2	4	Dlgap4	4.25157e-06	8.61016	8.63542	8.54672	8.41583	8.12802	8.72614	8.92434	8.87821	9.26705	9.02416	8.52292	8.25645	8.53901	8.83379	8.62089	7.85509	8.04111	7.78394	8.01251	7.84309
B2RQC6	4	Cad	1.73522e-09	6.90068	6.26644	6.65763	6.65957	6.69022	6.25765	6.57163	6.43844	6.38678	6.39488	5.92927	5.89392	5.59888	5.74602	5.51941	4.99547	4.59366	4.79609	4.591	4.68531
B2RRE7	4	Otud4	0.000398302	5.50077	5.93044	5.66122	5.32312	5.20182	5.84941	5.70421	5.64571	5.9524	6.15457	5.55375	5.55512	5.82623	5.6906	5.58758	4.98091	5.20482	4.37191	5.21604	4.98642
B2RSH2	1	Gnai1	8.14138e-05	7.44416	7.40604	7.4808	7.13381	6.50482	7.75561	7.96633	8.23068	8.00866	7.77111	8.0182	7.55816	8.28431	8.2888	8.55221	8.69816	8.49382	8.18252	9.03763	8.84846
B2RUJ5	4	Apba1	6.48952e-08	9.04581	9.27371	8.9697	8.64743	8.69388	10.0361	10.2059	10.1204	10.065	9.97913	9.41969	8.72101	8.80744	9.30595	8.70594	8.28987	8.39363	8.18301	8.05137	8.03793
B9EJ80	4	Pdzd8	0.00163765	6.4618	6.79707	6.6364	6.33286	6.5522	6.63313	6.40614	6.51274	6.66538	6.91485	6.64997	6.75132	6.63939	6.70618	6.61481	6.07078	6.37535	6.11004	6.26934	6.34774
B9EJ86	1	Osbpl8	0.176866	6.86178	6.4276	6.68996	6.47622	6.53779	6.45593	6.82775	7.3636	6.83431	6.78348	6.63459	6.34998	7.04307	6.99677	7.03079	7.03106	7.2359	6.57956	7.09113	7.10885
B9EJA2	5	Cttnbp2	7.80028e-08	6.91811	6.98876	7.18395	7.2205	7.05897	7.53757	7.63264	7.83317	7.68722	7.72127	8.03763	7.96335	8.08923	8.06903	8.30928	8.09305	8.00288	7.65448	8.00169	8.03703
D3YVF0	6	Akap5	1.068e-06	9.30859	9.71802	9.4449	9.67981	9.96348	9.55993	9.37844	9.37153	9.51905	9.63561	9.50863	10.1017	10.4416	10.2909	10.1198	10.5717	11.2219	10.9613	11.1059	11.0691
D3YXK2	3	Safb	5.78433e-07	8.20422	7.74873	7.85713	8.487	8.04644	6.93477	6.92205	6.62952	7.02825	7.20586	6.42071	6.91103	6.96615	6.94972	6.66937	6.11428	6.45628	6.65782	6.69571	6.65465
D3YZI9	1	Pgbd5	3.03687e-05	3.63617	4.75424	4.04252	3.327	3.47602	4.12024	4.35632	4.69705	4.71816	4.8129	4.98144	5.1368	5.42508	5.61266	5.52862	5.38531	5.62768	5.01254	5.98497	5.98045
D3YZP9	4	Ccdc6	2.46606e-05	5.88024	5.88101	5.67914	5.74438	5.6985	5.5303	5.73557	5.63491	5.8647	5.99412	5.33041	5.44063	5.48319	5.51672	5.42493	5.21418	5.41645	5.25487	5.1609	5.35272
D3YZU1	4	Shank1	8.17335e-06	6.21306	6.15338	6.25744	6.39452	6.60853	5.99572	6.31321	6.43303	6.34456	6.72953	5.56695	5.60767	5.72997	5.99307	5.69251	5.48448	5.75291	5.35485	5.49824	5.4911
D3Z7P3	6	Gls	3.32353e-07	5.9234	5.98002	6.82443	6.65374	6.02509	6.82468	6.72674	6.82986	6.61156	6.80603	7.23885	7.19266	7.62219	7.53722	8.0008	8.31082	7.92526	8.08434	8.52125	8.3817
E9PUL5	5	Prrt2	8.25757e-07	6.74781	7.45878	7.56452	7.57805	7.0202	7.63661	7.84018	8.07538	8.0633	7.8639	7.82749	8.0616	8.3988	8.53147	8.49536	8.73372	9.0853	9.05405	9.36544	9.14764
E9PVA8	3	Gcn1	0.00698183	3.56572	3.61929	3.74243	3.32639	3.07698	2.9118	2.97419	2.91668	3.19131	2.36004	2.52542	2.64429	3.43622	2.52987	2.68117	2.37036	2.96949	2.49245	3.04881	2.62811
E9Q3L2	5	Pi4ka	1.02831e-08	6.72303	7.43192	7.57391	7.45626	7.52489	8.52864	8.57339	9.29797	8.78698	8.88534	9.44903	8.80597	9.50017	9.7814	9.52067	10.1908	10.3082	10.0004	10.5176	10.3283
E9Q401	5	Ryr2	8.38022e-08	4.17943	5.09714	5.87995	6.03983	6.08935	7.2009	7.188	7.83319	7.23795	7.26747	8.12235	8.42247	8.18165	8.40655	8.43497	8.70231	9.21239	8.53548	9.03019	8.9151
E9Q5C9	3	Nolc1	2.71897e-06	6.68438	6.50903	6.14042	6.9565	7.24655	4.55551	5.14734	4.81064	5.46458	5.70834	4.66645	5.06867	4.57438	4.81938	4.82476	4.73613	4.84285	5.42651	4.61236	5.07722
E9Q7G0	3	Numa1	1.63078e-07	6.98873	6.58557	6.41565	7.20865	7.10279	5.29535	5.03258	5.04506	5.26163	5.26236	4.57423	5.49759	5.27078	5.16806	5.01473	4.96609	5.37878	5.35747	5.18607	5.491
E9Q7X7	4	Nrxn2	2.30797e-09	7.23607	7.60589	7.46747	7.10042	7.20913	7.96361	8.06385	7.7518	8.03144	7.93998	6.87909	6.3938	6.5226	6.73884	6.1425	5.7372	5.44954	5.95004	5.51262	5.49229
E9Q8I9	8	Fry	0.000842436	7.05916	6.79688	6.6575	6.42561	6.14257	7.37322	7.87158	8.61241	7.58045	7.40774	6.84781	6.70451	7.41498	7.28092	7.06737	6.77573	6.72179	6.49816	6.99745	6.95191
E9QAT4	3	Sec16a	0.00153621	4.09483	4.39213	3.77272	4.31889	4.19706	3.74819	3.4141	3.02731	3.62653	3.73664	3.33191	4.08634	4.06737	3.50932	3.05987	2.98843	3.20642	1.25689	2.75299	2.75731
F6SEU4	5	Syngap1	2.13846e-07	6.9044	6.79285	7.13124	6.87514	6.79405	7.65313	7.74158	8.10884	7.9551	7.96045	7.84232	8.23511	8.70934	8.58402	8.59967	8.31256	8.39872	8.40919	8.90232	8.73175
F6ZDS4	3	Tpr	6.35453e-05	5.35622	5.0764	4.98304	5.52295	5.43935	4.11023	4.09227	3.87592	4.24431	4.5354	3.70815	4.15371	4.47627	4.0982	4.14208	4.32787	3.14217	3.89056	4.32337	4.13826
F8VPU2	3	Farp1	2.99781e-08	7.08354	6.94075	6.6783	7.07804	7.37038	6.22031	6.44927	5.80801	6.1002	6.53411	5.19735	5.17044	5.12077	4.89836	4.84709	4.85404	4.4497	5.02557	5.264	5.34581
G3X9J0	4	Sipa1l3	0.00638309	5.22167	5.15212	5.34703	5.33027	5.27722	5.04997	4.67524	4.57181	5.42472	5.36877	4.81782	5.6949	5.0455	4.87911	4.90854	4.50248	4.43514	4.93757	4.25118	4.2017
G3X9K3	5	Arfgef1	5.80727e-06	5.30158	5.90343	5.76208	5.5386	5.1448	6.27569	6.28958	6.67582	6.40289	6.30039	6.38942	6.34764	6.38462	6.58256	6.42346	6.29374	6.59795	6.32778	6.48969	6.38105
G3XA57	1	Rab11fip2	0.0122473	5.76565	5.59799	5.43369	5.557	5.32944	5.78581	5.82746	5.90508	6.45834	6.0924	5.86369	5.61027	5.93102	6.13172	6.09005	5.79623	5.80484	5.63878	5.73168	5.98839
G5E829	5	Atp2b1	2.99781e-08	7.9775	8.28474	8.68534	8.25401	8.36834	9.10572	9.25024	9.46762	9.40614	9.32363	9.55012	9.77418	10.2958	9.91473	10.0805	9.97767	9.91619	9.97125	10.3543	10.1613
G5E870	3	Trip12	0.040298	4.77533	4.9513	4.50071	4.07233	4.3387	4.00126	3.62812	3.52038	4.33574	4.2633	4.05512	4.53856	4.43184	4.20181	3.95371	3.15915	3.83706	3.78423	3.87901	4.47281
G5E8K5	5	Ank3	7.35399e-09	8.61049	8.36896	8.9279	8.9967	8.75594	9.53284	9.24102	9.66483	9.70905	9.89497	10.1551	10.8353	10.7575	10.3353	10.4746	10.7204	11.1736	10.9937	11.2317	11.1602
O08529	4	Capn2	1.78038e-06	7.51383	7.49589	7.42786	7.28354	7.51778	7.63647	7.70369	7.47186	7.79372	7.80056	7.26987	7.07939	7.11766	7.1167	7.00208	7.24593	6.89342	7.08171	7.03527	7.0709
O08539	5	Bin1	5.91954e-09	8.72991	8.7666	9.07699	8.88834	8.78448	9.87992	9.87136	10.0985	10.0268	10.2743	10.2885	10.3549	10.0484	10.3062	10.5013	10.226	10.401	10.1293	10.0914	9.96575
O08553	4	Dpysl2	7.58598e-05	11.6094	11.7246	11.5155	11.5126	11.6574	11.5485	11.5595	11.4374	11.6236	11.7801	11.3258	11.3489	11.1201	11.1353	11.148	11.4266	11.5522	11.4698	11.4259	11.4212
O08576	2	Rundc3a	0.0137508	3.95692	4.72607	4.22632	4.31543	5.1183	4.80237	4.55735	4.64998	4.69464	4.81382	4.82185	5.01936	4.5069	4.34208	4.47281	3.70213	4.28933	4.24983	3.90414	3.99525
O08579	3	Emd	0.00184682	5.61857	5.73061	5.43714	5.66165	5.92449	5.50205	5.39036	5.14728	5.49669	5.71395	5.6894	5.21593	5.15929	5.2867	5.0834	4.52854	5.03113	5.34648	4.65708	5.03714
O08582	3	Gtpbp1	4.21602e-06	7.08367	7.11401	6.89116	6.99498	7.12377	6.24965	6.07161	5.63335	6.35084	6.32231	6.09188	6.28837	6.01616	5.9278	5.97283	5.85084	6.10373	6.41939	5.8589	5.97614
O08585	5	Clta	5.96106e-09	7.88631	7.96628	8.4684	8.26925	8.09256	9.15983	9.44766	9.9979	9.61725	9.51853	9.94314	9.61824	10.085	10.3811	10.1698	10.671	10.7732	10.4361	11.0324	10.7289
O08586	2	Pten	0.00591329	5.51932	5.96664	5.754	5.77617	6.15891	6.14072	6.13243	6.06046	6.15092	6.29007	6.28481	5.98888	6.07078	6.07541	6.00207	5.74357	5.86892	5.73151	5.91303	5.90862
O08599	5	Stxbp1	6.81613e-09	8.82893	8.94154	9.33093	8.96724	9.03282	9.85412	10.2006	10.606	10.2381	10.2295	10.4905	10.3355	10.6289	10.8949	10.894	11.2671	11.3328	10.9542	11.5271	11.4368
O08644	8	Ephb6	3.15802e-06	5.69647	6.07068	6.3548	5.80255	5.82837	6.92032	7.40949	7.56472	7.2728	7.05488	6.7051	6.44557	6.76039	7.01244	7.01354	6.39279	6.33358	6.04335	6.38516	6.46171
O08663	3	Metap2	3.07222e-08	5.86037	5.48202	5.75498	5.89074	6.02127	5.28217	5.24109	4.83232	5.22485	5.2415	4.83325	4.81465	4.76425	4.76132	4.94871	4.56615	4.18475	4.55153	4.32098	4.23343
O08688	7	Capn5	0.0796258	4.19343	4.60544	4.89949	4.76715	4.57369	4.36346	4.42483	4.23135	4.9761	4.8226	4.92727	5.43088	4.72354	4.87241	5.09403	4.80155	4.6287	4.69825	4.44241	4.9744
O08709	6	Prdx6	6.56025e-06	4.85404	3.60027	4.89556	4.64457	4.18776	4.49913	4.91901	4.83481	4.81101	4.68853	5.55996	5.52517	5.64552	5.51973	5.8898	6.22273	5.7684	5.65665	6.33252	6.11349
O08715	4	Akap1	0.000811001	3.95164	4.35399	3.45573	3.57843	3.71605	3.45637	3.40895	3.28981	3.57439	3.41943	2.79299	1.71418	3.2795	3.44349	2.86734	2.03307	2.5248	2.96759	2.22178	2.54929
O08749	6	Dld	0.000374482	7.83508	7.40479	8.33796	8.26757	8.05905	8.28819	8.37958	8.00988	7.69828	8.054	8.59058	7.38736	8.61016	8.13562	9.15787	10.0119	9.07681	9.07928	9.64624	9.73443
O08756	3	Hsd17b10	6.2336e-08	8.43587	8.6649	8.1669	8.41922	8.0477	6.22589	6.64896	6.22753	6.33894	6.65964	6.50292	6.63353	6.09007	6.41902	6.5297	6.2133	6.40231	6.71129	7.15798	6.96785
O08759	8	Ube3a	5.45385e-05	9.32752	9.18588	9.30518	9.23479	9.02166	9.55244	9.6713	9.65088	9.87068	9.86622	9.52455	9.25484	9.61859	9.75758	9.46717	9.00236	9.21216	9.11125	9.25798	9.23365
O08784	3	Tcof1	1.1295e-08	7.51475	7.28692	7.10711	7.79448	7.88978	5.58441	5.71403	5.48452	5.6125	6.10684	5.29637	5.56879	5.17297	5.74775	5.48185	5.27562	5.66766	5.40431	5.12068	5.11812
O08788	3	Dctn1	0.00354866	9.49167	9.36156	9.60016	9.7782	9.51955	9.43833	9.45093	9.41418	9.40486	9.42625	9.27015	9.30105	9.34774	9.2555	9.35392	9.35545	9.30204	9.11593	9.32355	9.40845
O08795	7	Prkcsh	0.000342001	3.75905	3.36933	3.62852	4.12569	3.7608	2.85695	2.92632	2.54188	2.83831	2.8818	3.03386	3.80847	3.74514	3.00723	3.56909	3.07078	2.84827	3.13475	2.94121	3.25078
O08807	7	Prdx4	0.115038	7.07498	6.80074	6.73583	8.81771	6.87191	7.10718	7.01708	6.97108	6.78824	6.90973	6.54472	6.72463	7.01669	6.68594	6.44943	6.34588	6.52679	6.55281	6.28486	6.85939
O08808	3	Diaph1	6.04956e-07	5.2842	5.43446	5.15794	5.07402	5.08082	4.57157	4.8514	4.65018	4.7715	4.60525	3.85453	3.7053	4.22236	4.22835	4.07418	4.02738	4.29986	3.59064	4.1769	4.20159
O08810	3	Eftud2	1.95079e-06	6.20908	6.1443	6.35515	6.30471	6.37188	5.36688	5.22323	5.23802	5.26033	5.47891	5.01594	4.34597	5.25796	5.08032	5.20797	4.87295	4.11422	4.97402	4.81588	4.99236
O08848	3	RO60	0.000814	4.07865	3.63448	4.10832	4.73362	4.37012	4.01776	3.18219	3.08103	3.63602	3.49509	3.68081	3.55309	3.2349	3.09344	3.11407	2.9823	3.15416	3.04806	3.10009	3.43121
O08917	1	Flot1	3.80772e-05	6.4658	6.04386	6.97088	6.73891	6.58467	7.32623	7.44121	7.53934	7.22224	7.08888	7.34229	7.10832	7.25522	7.30999	7.77481	8.00009	7.73612	7.35476	7.93328	8.03997
O08919	5	Numbl	2.48475e-06	7.3071	7.53887	7.4108	7.21733	7.10257	8.09108	8.1222	8.20558	8.5521	8.31487	8.12328	8.11757	8.29101	8.43693	8.45016	7.95517	8.19565	7.80616	8.36802	8.22976
O09061	3	Psmb1	2.32239e-07	7.6641	7.16703	7.19592	7.63912	7.29358	6.5685	6.67089	6.42682	6.42046	6.25691	6.13167	5.48152	6.05561	6.0218	6.1318	6.09766	5.66215	6.0134	6.18436	5.83851
O09111	6	Ndufb11	1.71254e-07	7.29419	7.15775	7.95196	7.67071	8.18322	7.77617	7.90063	8.01248	7.898	7.93347	8.43472	8.48365	8.56558	8.67112	8.70413	9.16381	9.15713	9.21578	9.3185	9.2942
O09131	8	Gsto1	0.00176477	7.82602	7.17922	7.35665	6.95565	6.76756	7.32121	7.94484	8.08167	7.5731	7.25643	6.67605	5.92161	7.40405	6.8826	7.15527	6.72555	6.1719	5.82908	6.50931	6.36076
O09167	3	Rpl21	7.49703e-06	6.20713	5.62062	6.27639	5.9928	6.62268	4.89629	4.69955	4.03563	4.59721	4.9539	4.07493	4.71687	4.33199	4.69597	4.39778	3.83413	4.70935	5.02038	4.50371	4.52043
O35083	1	Agpat1	0.0367319	6.96571	7.0161	7.00184	6.88805	6.69109	6.82814	7.11716	7.75315	7.39354	6.74912	6.90791	6.74534	7.37362	7.70251	7.51749	7.33918	7.57211	7.43479	7.93014	7.65221
O35098	3	Dpysl4	0.00919315	9.0822	9.27772	9.19187	9.12722	9.39604	9.31586	9.00921	8.82962	9.24865	9.43532	9.13128	9.38118	8.96966	8.89499	8.94233	8.77903	8.89251	8.8336	8.68317	8.80312
O35099	5	Map3k5	9.46473e-06	3.98258	5.58608	5.69	4.74604	4.13858	6.47877	6.65711	6.99702	6.85443	6.62338	6.87673	6.62296	6.66129	6.9709	6.85942	6.15039	6.61018	6.47966	6.53393	6.63356
O35129	6	Phb2	0.0013467	9.54066	9.46521	9.64963	10.021	9.57222	9.39227	9.34129	8.96586	9.10994	9.16224	9.50821	9.08958	9.55756	9.26765	9.87946	10.1039	9.53706	9.91958	10.3431	10.2197
O35136	5	Ncam2	1.59555e-05	6.24645	6.71954	7.07115	6.57618	6.46998	7.679	8.17173	8.1616	7.51317	7.56788	7.87496	7.42063	7.87692	8.23247	8.4884	7.94903	7.80936	7.93873	8.15045	8.42885
O35143	7	Atp5if1	0.0774824	4.16218	5.30007	3.50213	4.08828	4.579	3.11144	3.46977	3.84326	4.51205	3.97096	4.14609	5.14919	4.57989	5.21945	3.73775	4.08892	3.19404	3.9994	3.62978	3.49685
O35226	3	Psmd4	1.44887e-06	6.04047	5.8626	5.95138	6.43661	6.16437	5.53821	5.49983	5.36365	5.71136	5.5381	5.34322	5.41814	5.58539	5.40931	5.52672	4.95829	5.22204	5.21198	4.91602	5.25328
O35239	6	Ptpn9	1.11002e-05	5.19706	5.74439	5.31704	5.50465	5.57334	5.77974	5.39437	5.18995	5.76241	5.81222	5.85123	6.07007	5.59174	5.78089	5.85658	6.38061	6.38515	6.40221	6.4763	6.45364
O35286	3	Dhx15	7.01066e-08	8.21279	7.81589	8.28964	8.60407	8.3265	7.12538	7.15839	6.73672	6.93776	7.24309	6.74536	6.28816	6.78231	6.68603	6.88367	6.73994	6.3936	6.51114	6.6017	6.85748
O35295	5	Purb	6.95254e-06	5.64066	5.73331	6.85789	6.63446	6.45329	7.38063	7.12422	7.07691	6.96754	7.30069	7.77349	7.82011	7.98358	7.58081	8.02072	7.60745	7.3787	7.62354	7.79401	7.89746
O35326	3	Srsf5	5.69574e-08	6.23225	6.19099	6.02554	6.16201	5.97366	4.31124	3.209	3.86666	4.18657	4.31025	4.04688	4.50619	3.99926	4.05728	3.93038	3.90232	4.10539	4.39059	4.27196	4.60128
O35344	8	Kpna3	0.106614	6.59122	6.35728	6.11819	5.96787	5.52629	5.82732	6.57011	7.02313	6.75159	6.12117	5.823	5.44156	6.03918	6.20437	6.01294	6.0981	5.99639	4.97537	6.07442	5.7689
O35350	5	Capn1	3.679e-05	4.10885	4.47334	4.4621	3.7322	4.25041	5.0421	5.15639	4.6838	5.17138	5.04514	4.90611	5.30054	5.20593	5.0818	4.99703	4.84827	4.93902	4.96994	5.30606	5.24638
O35381	3	Anp32a	3.33098e-05	8.25948	7.84209	8.95094	9.04801	8.36197	7.47241	7.47804	7.27026	7.54425	7.68443	7.17929	7.33631	7.53221	7.42401	7.38849	7.48557	7.28196	7.46351	7.00024	7.22385
O35382	8	Exoc4	0.0442232	7.70145	7.05746	7.36332	7.31642	6.93384	7.42443	8.34411	8.59209	8.09588	7.66941	7.21236	6.29101	7.58886	7.70893	7.48209	7.59934	7.5636	6.94579	7.6563	7.52693
O35405	1	Pld3	0.00764625	4.39043	3.81436	5.10616	4.82361	4.67078	5.52771	5.4857	5.77577	4.93039	5.27815	5.69408	5.10707	5.48751	5.36051	6.10815	5.7299	4.65107	5.32202	5.32424	5.48175
O35449	8	Prrt1	0.000536556	3.28998	4.18567	3.42531	3.52085	3.497	4.48455	4.9636	5.2747	4.9059	4.74165	4.45941	3.1561	4.54143	4.56941	4.09951	3.49907	3.27604	2.52008	3.85484	3.65189
O35495	5	Cdk14	2.83823e-10	6.04473	6.0557	6.25088	5.89919	6.06998	6.97792	7.01447	7.1454	7.15625	7.17046	7.38962	7.13161	7.22966	7.37429	7.33149	7.59066	7.78415	7.44973	7.61238	7.73918
O35526	5	Stx1a	1.43535e-07	7.29897	7.65307	8.19302	7.84498	7.72187	8.52047	8.97041	9.40451	8.92238	8.90047	9.06758	9.22453	9.51869	9.86256	9.64775	9.92388	10.1814	9.64689	10.4729	10.2184
O35551	4	Rabep1	0.0122565	9.55657	9.46744	9.31731	9.26639	9.40999	9.51795	9.35483	9.39681	9.54954	9.52613	9.42314	9.53708	9.42739	9.4919	9.42114	9.22381	9.42655	9.17961	9.27895	9.22178
O35607	5	Bmpr2	1.3722e-05	6.49676	6.19006	6.55427	6.4656	6.1486	7.05632	6.96676	7.02703	7.42871	7.54084	7.15053	7.18164	7.16373	7.42105	7.21393	6.77467	6.79645	6.82594	7.16046	7.0009
O35609	5	Scamp3	1.56237e-07	5.83049	5.96744	6.20923	6.18716	6.04601	6.41284	6.6491	6.58305	6.70097	6.77443	6.96268	6.7868	6.67593	6.95146	6.85646	6.9568	7.03774	6.83509	7.1007	7.16074
O35621	8	Pmm1	0.000848435	5.22059	5.35074	5.70959	5.14665	5.30556	5.77966	5.90331	6.01697	5.92473	6.03295	5.69596	5.5109	5.61461	5.91388	5.92185	5.65359	5.10506	5.05007	5.4484	5.55193
O35633	1	Slc32a1	0.000394894	4.25086	4.81002	4.39535	4.42405	2.9963	4.8729	4.7577	5.54096	5.44355	5.02352	5.00274	5.21362	6.24343	6.15164	5.87021	5.5647	5.60544	5.95051	6.32568	6.09784
O35681	1	Syt3	7.17831e-05	5.05483	4.48104	4.87878	4.86453	4.04503	5.46267	5.91468	6.22448	6.03403	6.07803	5.58359	5.33308	5.79267	5.95352	5.94128	6.15994	5.63378	5.40312	6.03086	6.17719
O35685	4	Nudc	0.00046745	7.73508	7.46197	7.95064	7.72538	7.30976	7.43416	7.57993	7.691	7.49895	7.42979	7.24576	7.07791	7.18995	7.13902	7.47295	7.20722	7.091	7.03969	7.144	7.14972
O35691	3	Pnn	3.13174e-07	7.18383	6.86634	6.27815	7.34726	7.23948	5.25899	5.40715	5.33074	5.75806	5.71258	5.47781	5.00034	5.30633	5.12767	5.23081	5.17315	4.84038	5.49743	5.057	5.37463
O35857	6	Timm44	0.00184176	3.71119	3.17757	3.36756	4.30857	4.44371	2.90877	3.05311	2.79443	2.67864	3.07357	3.77032	4.22171	3.7262	3.50156	3.62332	3.65091	3.50389	4.09694	3.96629	3.98668
O35927	4	Ctnnd2	6.63205e-05	10.4077	10.4585	10.1922	10.2317	10.2093	10.6555	10.5681	10.5844	10.8874	10.9274	10.5302	10.5091	10.2466	10.6296	10.3586	10.0494	10.2742	10.1732	10.086	9.98345
O35954	2	Pitpnm1	8.29661e-09	7.02054	7.29367	7.50396	7.14457	7.14237	8.15359	8.14161	8.32582	8.24522	8.34078	8.31039	8.20784	8.10781	8.32073	8.17796	7.74802	7.88891	7.75387	7.73686	7.70651
O54774	5	Ap3d1	6.28288e-06	8.43497	8.28993	9.00551	8.94554	9.04922	8.62768	8.93771	9.39719	9.6202	9.62558	10.0526	10.0935	9.85739	9.83535	9.9611	10.5239	10.2286	10.249	10.1337	10.0753
O54781	5	Srpk2	7.78654e-07	5.94133	5.94602	5.84961	5.97202	5.68298	6.26876	6.1425	6.28503	6.47806	6.63111	6.78334	6.87752	6.8585	6.95232	6.86543	6.28834	6.63655	6.75759	6.79784	6.7952
O54828	5	Rgs9	1.91998e-07	1.57173	3.42995	4.13059	1.68174	3.12868	5.88723	5.65205	6.13164	5.15514	5.74718	6.40866	6.4882	6.56807	6.12227	6.286	6.72295	7.0071	6.95482	6.84917	6.75222
O54829	5	Rgs7	1.13553e-07	3.23019	3.14498	3.62336	3.50923	4.18417	4.3678	4.21849	4.65771	4.60824	4.70885	5.2488	4.94068	4.78905	5.17118	5.06067	5.58867	5.73134	5.45747	5.57538	5.22848
O54833	6	Csnk2a2	0.17587	5.09791	5.25663	5.30897	5.26192	4.57394	4.98726	5.15919	5.17804	5.33998	5.15162	5.19502	4.84777	5.19734	5.14784	5.48567	5.46819	5.34919	5.12588	5.61759	5.5046
O54865	4	Gucy1b1	1.62638e-08	9.07617	9.04816	8.79274	8.65573	8.41829	8.13501	8.6195	8.22881	8.426	8.36795	7.41893	6.90997	7.58628	7.36905	7.24963	7.19818	7.20358	7.06654	7.09806	7.17952
O54983	5	Crym	1.35757e-05	6.87114	6.93273	8.44447	7.92149	8.16424	8.85075	8.66785	8.86021	8.34005	8.63316	9.75915	9.72813	9.44837	9.17449	9.74615	9.78872	9.05782	9.4226	9.55901	9.74963
O54988	5	Slk	3.41812e-07	6.36275	6.01526	6.76598	6.77615	6.6783	7.20911	7.10562	7.55099	7.1953	7.10277	7.74934	7.70251	8.1346	7.75923	8.1078	7.89185	7.99354	7.68217	7.85294	7.92705
O54991	5	Cntnap1	6.30817e-07	3.02106	2.56625	1.03401	1.4178	1.78627	2.89439	3.30544	3.90348	3.63846	4.30819	4.918	5.27074	5.88271	5.52747	6.14439	5.04427	5.18474	4.88763	5.9811	6.18754
O55017	5	Cacna1b	3.15511e-06	6.62228	6.8485	6.91973	6.60079	6.96758	7.13889	7.24626	7.31258	7.67011	7.72596	7.68282	7.68213	7.4122	7.82916	7.67821	7.63213	7.73387	7.70224	7.88271	7.85658
O55023	6	Impa1	0.0301928	8.60555	8.18576	8.82019	8.73158	8.78092	8.71808	8.51984	8.30456	8.30973	8.69019	8.75356	8.75516	8.70593	8.37961	9.01145	9.18891	8.74201	8.87168	8.95614	9.07353
O55029	4	Copb2	0.00543656	6.54437	5.96913	6.33943	6.15384	5.62929	6.17615	6.20326	5.87615	6.2043	5.88896	5.77071	5.83546	5.84189	5.82548	5.91779	5.54317	5.414	5.5403	5.6577	5.82278
O55042	5	Snca	3.58568e-08	6.69595	7.13834	8.17856	8.02049	7.80906	8.97476	8.83498	9.08722	9.14681	9.62328	9.84474	9.87452	9.8316	10.2766	9.91412	10.4121	10.5078	10.4734	10.6742	10.683
O55106	5	Strn	3.99741e-06	5.93744	6.99562	6.9306	6.60158	6.65557	7.56062	7.23699	7.26258	7.41634	7.67083	7.87508	8.12439	8.10557	7.79399	7.90647	7.56044	7.65662	7.6226	7.60585	7.67831
O55125	6	Nipsnap1	6.86318e-05	6.75765	6.80951	7.18718	7.46013	7.39195	6.70486	6.61663	6.17251	6.24	6.53369	6.83705	6.54024	6.80083	6.38013	7.20425	7.9874	7.21386	7.61525	8.03953	8.13152
O55126	6	Nipsnap2	0.000807462	4.5189	3.51511	4.23693	4.12172	4.22875	4.42034	4.31507	3.62162	3.60245	3.96495	4.17902	3.76607	4.04193	3.95046	4.89893	5.54715	4.55414	5.10272	5.41235	5.52852
O55131	5	Septin7	8.50287e-10	8.09641	8.26689	8.9219	8.70898	8.65418	9.52663	9.5014	9.88725	9.52314	9.64402	10.4006	10.3856	10.3075	10.4484	10.5908	11.0819	11.0018	10.7943	11.1804	11.0753
O55142	3	Rpl35a	0.00581727	5.96984	4.40609	4.56653	5.08417	5.46326	3.68984	4.63961	5.04463	4.49071	4.16806	2.69048	4.01926	3.99645	3.95606	3.97708	4.15283	3.96303	3.2209	4.09428	4.10607
O55143	5	Atp2a2	6.44642e-07	8.42006	9.12749	9.38279	9.05689	9.07795	9.7404	9.63759	9.69678	9.59625	9.72648	10.1803	10.0156	10.326	10.1999	10.4211	10.1077	10.1438	10.1523	10.466	10.3941
O55234	3	Psmb5	9.12575e-09	8.71	8.7505	8.41447	8.88971	8.88366	7.90919	7.67364	7.25199	7.68422	7.63669	7.2781	7.18702	7.30921	7.35584	7.39364	7.17957	7.04051	7.41069	7.28635	7.22543
O70133	3	Dhx9	3.80113e-08	9.52327	9.35195	9.51095	9.69748	9.33543	8.38744	8.25942	8.08523	8.57059	8.43436	7.90359	7.96963	8.28417	8.25432	8.12594	7.8738	7.51357	7.9117	8.18673	8.1639
O70161	5	Pip5k1c	2.38464e-10	5.87027	6.08205	6.49033	6.25264	6.61717	7.47255	7.32191	7.61773	7.48919	7.71625	8.16597	8.52564	8.22464	8.4937	8.43697	8.91709	9.13568	9.09773	9.25729	9.16795
O70166	4	Stmn3	3.33187e-08	9.88854	9.8641	9.36235	9.28609	9.57626	9.34281	9.37358	8.86867	9.39519	9.25258	8.5464	8.52978	7.79328	8.07756	7.94521	7.53829	7.51289	7.80777	7.16199	7.43889
O70172	1	Pip4k2a	0.0342148	6.95849	6.8321	6.77911	6.89123	6.88354	6.84113	7.14502	7.48056	7.33781	7.01414	6.68802	6.75135	7.02553	7.1703	7.34518	7.25545	7.17299	7.10817	7.54138	7.36243
O70194	3	Eif3d	1.94578e-07	4.83544	4.43073	4.44121	4.89318	4.40538	3.47978	3.58223	3.52519	3.76533	3.95716	3.35456	3.5609	3.50223	3.3951	3.87567	3.19951	3.12696	3.21017	3.24351	3.40163
O70228	3	Atp9a	3.72929e-05	8.18078	8.51876	8.31746	8.13361	8.6917	8.34294	8.05848	7.97358	8.50978	8.49203	7.75885	8.21914	7.82397	7.86427	7.69072	7.10173	7.47242	7.66104	7.33062	7.52613
O70252	1	Hmox2	0.00650608	7.17625	6.63036	7.04589	7.16191	6.84147	7.41364	7.60727	7.37809	7.51291	7.22422	7.45563	6.90978	7.3964	7.25216	7.65152	7.75586	7.53617	7.20545	7.73661	7.54836
O70305	3	Atxn2	0.000225179	7.46849	7.24706	7.2257	7.58494	7.7426	6.73115	6.8533	7.05591	7.03691	7.04217	6.56349	6.80101	7.15957	6.88173	6.81526	6.36734	6.94869	6.58469	6.71316	6.82813
O70310	7	Nmt1	0.0205807	3.56357	4.38244	4.67119	4.31531	4.30023	3.63608	3.75074	3.29196	3.58281	3.93421	3.79914	4.04298	4.24293	4.00934	4.05734	4.04415	4.1833	3.72563	3.94899	4.01304
O70311	4	Nmt2	0.000642264	5.86806	5.34527	5.39612	5.9492	5.27208	5.46039	5.59905	5.58678	5.47146	5.62142	5.0868	4.5867	5.10814	5.33689	5.2618	4.98366	4.91498	4.79233	5.06586	4.81182
O70318	5	Epb41l2	3.73671e-08	6.30954	6.60515	6.88994	6.33073	6.6838	7.26197	7.3556	7.82602	7.3368	7.39785	8.02735	8.37902	9.11891	8.45463	8.77919	8.43074	8.48522	8.76794	8.84178	8.82928
O70325	1	Gpx4	0.0425233	7.4165	7.26826	7.5772	6.97455	6.77123	7.3325	7.81729	7.90972	7.6781	7.68515	7.22207	6.74232	7.25884	7.51394	7.37553	7.50986	7.39822	7.15368	7.77563	7.70617
O70433	5	Fhl2	6.51588e-07	3.29971	4.0579	4.6339	4.20042	4.48162	4.69079	4.50385	5.47468	5.08726	4.97221	5.98274	6.72075	6.1759	6.40348	6.62353	5.65233	5.95936	5.78206	5.80915	6.01047
O70435	3	Psma3	1.30091e-07	7.38126	7.17217	7.24683	7.62076	7.34837	6.75375	6.5538	6.09789	6.33057	6.30419	6.09557	5.89224	6.04648	5.89026	6.27639	6.11587	5.53337	5.71657	5.93648	6.04459
O70439	4	Stx7	7.08085e-05	9.53522	9.71612	9.54954	9.46893	9.42695	9.36335	9.58149	9.46764	9.69256	9.69943	9.10342	9.07296	9.04447	9.37269	9.12043	8.81827	9.22331	9.14654	9.17334	9.10302
O70443	1	Gnaz	0.000147947	7.1921	7.27725	7.5738	7.42232	6.57153	7.91528	8.29894	8.55885	8.00107	8.02204	8.08986	7.17768	8.10961	8.25546	8.26741	8.7397	8.56047	8.22028	8.86863	8.80883
O70481	4	Ubr1	3.80578e-07	6.19189	5.95974	6.02191	6.04116	5.99092	5.89692	6.18731	5.93679	6.10288	6.03951	5.41016	5.44116	5.6618	5.5609	5.51922	5.61414	5.60159	5.40179	5.49215	5.61667
O70492	3	Snx3	0.00376915	6.43504	6.91569	6.92365	7.37007	7.63403	6.61391	6.16886	5.79319	6.40993	6.65696	6.42405	6.7893	6.38399	6.22631	6.24323	5.92626	6.19299	6.55028	5.7104	5.89003
O70493	7	Snx12	0.00142836	7.47348	7.48521	7.41246	7.55774	8.08744	6.78102	6.3711	5.92574	6.81913	7.15409	6.74868	7.55663	7.09953	6.87918	6.84932	7.29193	7.5287	7.69017	7.30533	7.32016
O70589	8	Cask	0.00124552	9.83068	9.82263	9.86372	9.78218	9.79155	10.101	10.1755	10.2571	10.3709	10.5328	10.1742	9.8401	9.93365	10.3579	9.93798	9.93257	10.0992	9.82549	9.95478	9.93797
O70591	3	Pfdn2	3.26764e-06	5.82792	5.21003	5.62191	6.35447	5.97448	4.94478	4.51542	4.21558	4.83796	4.7972	4.41006	4.52538	4.29487	4.12223	4.17631	3.82272	3.98749	4.66609	3.81647	3.89491
O88196	4	Ttc3	5.86572e-08	7.2203	7.14866	7.09449	6.85299	6.75994	6.59389	6.74678	6.79617	7.05557	6.91414	5.79189	5.68375	6.31527	6.15297	5.65026	5.33706	5.70171	5.11344	5.45368	5.23313
O88342	5	Wdr1	1.14396e-05	8.45356	8.40458	8.91774	8.79543	8.59181	9.03816	8.96822	9.03019	8.90557	9.10691	9.29596	9.11499	9.27244	9.17388	9.44093	9.40008	9.2117	9.18732	9.30419	9.47139
O88444	2	Adcy1	0.000746329	5.38992	5.90418	5.60508	5.41697	5.80937	6.57159	6.06493	5.97641	6.79901	6.62454	6.23896	6.4706	6.07647	6.44171	6.09348	5.6905	5.88484	5.99786	6.07187	5.73019
O88447	4	Klc1	2.69221e-06	10.3882	10.158	9.67252	9.59284	9.59478	9.96138	10.184	10.0372	10.072	9.77142	9.46254	9.21713	9.14372	9.34666	9.16636	8.90636	9.03503	8.77839	8.91748	8.82111
O88448	3	Klc2	0.000111032	9.55326	9.76474	9.52786	9.35831	9.54314	9.64589	9.31438	9.06629	9.65612	9.65349	9.21514	9.43453	9.09397	9.14297	9.0401	8.8901	8.94516	8.9804	8.74048	8.6828
O88455	3	Dhcr7	2.45409e-06	8.15405	8.62743	8.09903	8.32543	8.19815	7.9571	7.65528	7.83797	8.35646	8.1377	7.52348	7.96559	7.96232	8.29673	7.68059	6.30753	6.86742	7.20255	6.43465	6.56144
O88485	5	Dync1i1	9.87785e-05	6.12738	6.31796	6.59797	6.56364	6.75436	7.0599	6.69421	6.76615	7.22404	7.18791	7.12863	7.2308	7.05857	7.00107	7.16391	7.15722	7.18197	7.11588	7.15838	7.3077
O88532	3	Zfr	0.000189584	6.73322	6.53255	7.09199	6.96742	7.29343	6.19698	6.2956	6.06595	6.2902	6.44747	5.80198	6.04005	6.37718	6.13236	6.41893	5.99666	5.99657	6.13995	6.30028	6.34982
O88543	1	Cops3	0.00451715	8.16247	7.90557	8.38702	8.23272	7.88416	8.4888	8.57159	8.55981	8.50129	8.50664	8.50188	7.68553	8.47843	8.53282	8.62832	8.92129	8.75842	8.45812	8.95508	8.88421
O88544	5	Cops4	0.00169758	3.70831	3.48852	4.80523	4.30932	4.29982	4.93453	4.67764	4.50988	4.72367	4.84621	4.84195	5.30996	4.76718	4.90384	4.84595	4.83277	5.33669	5.60664	5.02354	4.94134
O88569	3	Hnrnpa2b1	5.39501e-07	10.337	9.94348	9.87146	10.395	10.3671	9.02633	8.99076	8.78682	9.21091	9.01728	8.58249	8.40425	8.99491	8.67256	8.95302	8.8358	8.18705	8.02822	8.7696	8.71735
O88643	5	Pak1	3.52453e-07	7.71427	7.12952	7.57461	7.49593	6.93894	7.66364	8.11486	8.38412	7.97548	7.96952	8.10074	8.36638	8.47918	8.49645	8.8966	9.37574	9.365	8.8889	9.55576	9.36886
O88685	3	Psmc3	4.04818e-06	7.1982	6.8335	7.30883	7.32568	7.01648	6.88557	6.89363	6.6895	6.7039	6.97009	6.7226	6.6055	6.7156	6.54505	6.80097	6.47801	6.05993	6.26781	6.14673	6.34841
O88696	7	Clpp	0.0014099	5.26479	4.57552	4.87572	4.89831	5.08894	3.83631	4.47408	4.43891	3.97544	3.70134	3.30835	3.92413	4.14486	4.13478	4.44274	4.51697	4.40955	4.36034	5.01429	4.75168
O88704	5	Hcn1	4.77043e-08	5.04225	5.23012	6.15704	5.86872	5.95529	6.88725	6.72571	7.01085	7.22317	7.40196	7.67379	8.25114	7.62788	7.83827	8.00879	7.75458	7.98966	8.11322	8.06946	8.03844
O88712	5	Ctbp1	9.43279e-07	6.48301	6.10604	6.71136	6.58958	5.82256	7.22206	7.43124	7.55836	7.39618	7.36615	7.63636	6.82018	7.59211	7.96142	7.9099	8.68342	8.3272	8.05717	8.51977	8.52141
O88737	5	Bsn	2.12814e-08	8.28959	8.44731	10.092	10.107	10.3324	11.6887	11.5609	12.3806	11.7962	11.9929	13.3103	13.3896	13.1419	13.5462	13.3588	13.6224	13.996	13.8233	13.9504	13.8407
O88738	4	Birc6	3.04474e-06	8.00547	7.99928	7.86345	7.90524	7.06554	8.00149	8.195	8.21709	8.40802	8.27345	7.69239	7.7244	7.93161	7.97651	7.75721	6.75108	6.99787	6.7886	7.0051	6.99267
O88741	6	Gdap1	0.00105987	7.32046	7.07356	7.21113	7.4145	7.09246	7.19796	7.40359	7.66172	7.2054	7.16238	7.32445	6.73174	7.71233	7.59031	7.81109	8.07981	7.8326	7.87956	8.36928	8.18793
O88809	4	Dcx	1.19105e-09	10.7256	10.7081	9.89404	10.1356	10.242	9.27726	9.37213	8.59341	9.29893	9.28794	7.46395	6.96006	6.43426	6.91908	6.35973	4.67722	4.70288	5.33262	3.19031	4.68752
O88811	4	Stam2	5.90244e-06	6.37363	6.15985	5.77756	6.0872	5.84649	5.97753	5.84057	5.60159	5.84599	5.93722	5.41372	5.26317	5.35841	5.07839	5.12773	5.16538	5.36924	4.56328	4.8568	4.93442
O88834	4	Shd	0.00163543	7.26262	7.26696	6.82565	6.67826	6.93022	7.15577	6.84916	6.52325	7.17622	7.14659	6.56342	6.55641	6.28479	6.24238	6.15362	6.53836	6.83664	6.72879	6.46565	6.58924
O88844	4	Idh1	2.64828e-10	10.5401	10.1627	10.1423	10.0613	9.98089	9.88703	10.1275	9.63622	9.85675	9.87666	8.83951	8.07358	8.4035	8.54443	8.2749	7.55054	7.19083	7.25669	7.01129	7.40351
O88910	6	Mpp3	2.50434e-05	3.01026	2.62054	3.54232	3.30462	3.15729	3.23904	3.15265	3.08003	2.88476	3.34642	3.16176	4.28603	3.63859	3.42999	3.97145	4.35302	4.20568	4.42316	4.67186	4.45105
O88935	5	Syn1	8.29564e-10	7.65661	8.08039	8.71604	8.06779	8.208	9.27762	9.44709	9.73127	9.50927	9.65033	10.3843	10.1095	10.341	10.5058	10.7465	11.3043	11.2334	11.1328	11.636	11.5246
O88983	3	Stx8	0.0610715	5.25188	5.87504	5.23605	5.39483	4.94892	4.94292	4.70314	4.94444	5.26837	5.33331	4.80446	5.22777	5.05254	4.87822	5.14873	4.61711	5.11221	4.88194	4.77179	4.9543
O89026	4	Robo1	5.27022e-09	9.65852	9.34363	8.63479	8.99104	8.89915	8.47776	9.03236	8.77268	8.57492	8.43395	7.76111	7.3559	7.43905	7.60412	7.3203	6.76326	6.7959	6.63144	6.51088	6.50216
O89032	5	Sh3pxd2a	7.55693e-07	3.34566	3.61686	3.87243	3.95935	3.19134	4.23535	4.45407	4.86269	4.19085	4.46024	5.16546	4.78833	5.30234	5.4702	5.30842	5.38804	5.58913	4.77653	5.57877	5.43397
O89053	6	Coro1a	3.67054e-05	7.1877	7.06563	7.69	7.58437	7.2809	7.85372	8.094	8.16869	7.62706	7.88588	8.0882	7.41292	8.02654	8.03906	8.29819	8.92529	8.58774	8.2338	8.6644	8.77358
O89084	5	Pde4a	7.73303e-09	4.77749	4.86026	5.51205	4.94678	4.4428	6.21565	6.49856	7.22589	6.64175	6.62847	7.18019	7.49825	7.44787	7.69007	7.79681	7.68926	8.10033	7.48156	8.10538	7.9351
O89086	4	Rbm3	8.80763e-07	7.21411	6.88098	6.25414	6.87391	7.31811	5.86912	5.97168	5.78104	6.35493	6.39856	5.3007	4.164	5.62914	5.3504	4.64539	4.57194	4.22616	3.90224	2.98108	3.74583
O89112	5	Lancl1	5.37032e-08	5.8509	5.25126	5.98939	5.96383	5.68092	6.56213	6.43045	6.59561	6.53939	6.56701	6.85655	6.45648	7.13623	7.20415	7.13366	7.73403	7.60831	7.42886	7.75114	7.54105
P00405	6	Mtco2	6.04925e-07	7.2986	7.60009	8.04066	7.99754	7.36988	8.0258	8.19915	8.15633	7.8075	7.93094	8.76842	7.98524	8.89934	8.96043	9.16954	9.52234	9.40481	9.48271	9.81671	9.67869
P00493	1	Hprt1	0.000357439	7.16239	6.64042	7.33166	6.93472	6.44655	7.64004	7.71637	7.73458	7.87035	7.71407	7.34246	6.98831	7.76896	7.58446	7.64772	8.20282	7.7936	7.48794	8.05912	7.87196
P01831	1	Thy1	2.72125e-07	4.1814	3.57737	5.27999	4.83312	5.05773	6.21355	6.55133	7.05365	6.71959	5.97401	6.55054	6.88593	7.4249	7.396	7.66194	7.94444	7.68948	7.71092	8.33963	7.95999
P01942	6	Hba	0.000280407	6.95068	7.25424	7.14275	7.39745	7.41446	6.81619	6.36663	5.96785	6.30228	6.82803	6.79976	7.50722	7.71695	6.82015	7.35785	7.40191	7.46355	7.82902	7.74353	7.63963
P02088	7	Hbb-b1	0.0069392	6.82719	6.71165	6.90242	7.05114	6.87791	5.96529	6.07069	6.13856	5.97755	5.59575	5.62024	6.17145	7.5367	6.01927	6.66912	7.26284	6.66226	6.6589	7.15668	6.89963
P03899	1	Mtnd3	0.00234635	4.33968	4.73132	4.24264	4.28505	4.01024	4.00567	4.84726	5.62793	5.07881	4.34706	4.50086	4.6253	5.42859	5.76158	5.48028	5.57907	5.39228	5.55242	6.16879	5.97832
P04104	7	Krt1	0.153594	8.10347	5.89329	6.71181	6.3485	6.1113	5.63476	6.83987	7.45188	4.93589	5.41673	5.45734	5.34915	6.06433	5.54464	5.23347	6.89839	6.78316	5.68778	5.99042	8.12302
P04925	6	Prnp	4.60754e-06	5.78581	5.99726	6.12111	6.50146	6.51086	6.12282	5.76449	5.71678	6.31027	6.24585	6.52228	7.26167	6.84157	6.92555	6.95807	7.05979	7.29276	7.60601	7.52464	7.35958
P05063	6	Aldoc	4.61535e-05	8.6808	8.25303	9.48427	8.94097	8.86465	9.17712	9.05452	8.93608	8.59865	8.99819	9.85603	9.82665	9.97547	9.41366	10.382	10.4294	9.61949	9.98895	10.2766	10.3555
P05064	5	Aldoa	1.33515e-08	8.77125	8.28647	9.45427	9.26581	9.09165	9.80156	9.80665	9.92477	9.63294	9.84177	10.5926	10.7983	10.8248	10.6449	11.1423	11.6444	11.2652	11.1653	11.5903	11.4968
P05480	4	Src	0.00204544	6.316	6.08083	6.55679	5.87549	6.20617	6.23731	6.38364	6.47155	6.36183	6.36406	6.04626	5.46439	5.97131	6.11946	5.84537	5.81832	5.79893	5.77953	5.72494	6.05298
P06151	1	Ldha	0.000632487	8.93608	8.8756	9.34763	8.92013	8.38012	9.61106	10.2004	10.4556	9.84593	9.67313	9.86524	9.00792	10.2334	10.2818	10.3586	10.5172	9.99707	9.8305	10.6574	10.4331
P06537	2	Nr3c1	0.00408022	4.69935	5.36715	5.66454	4.92083	5.13995	5.84015	5.55203	5.6619	6.27633	6.64889	5.46903	5.74197	5.50474	5.80009	5.76698	4.96681	5.41553	5.36898	5.31132	5.34629
P06745	6	Gpi	2.58495e-05	5.95904	4.95257	6.15318	5.81821	5.75343	6.3388	6.67739	6.90458	6.35326	6.18302	6.54771	5.71909	6.69683	6.76484	6.97841	7.79964	7.48448	7.29812	7.70276	7.5172
P06837	4	Gap43	8.15097e-07	10.9938	11.0263	10.9371	11.0568	10.5243	10.8189	11.1031	11.1798	11.3571	10.9732	10.6448	11.0532	11.0065	11.2462	10.9582	10.0105	10.0523	10.0113	9.93766	10.0085
P07356	3	Anxa2	0.0108408	5.43849	4.29235	4.4776	5.69469	4.91317	4.32514	4.04633	3.76991	3.69245	3.67427	3.66626	4.381	4.87183	3.42098	3.70332	3.80905	3.69381	3.16475	3.73792	4.57031
P07901	1	Hsp90aa1	0.146353	9.82426	9.72905	9.90304	9.65173	9.59376	9.63697	9.92599	10.0046	9.82848	9.87616	9.72745	9.57394	9.96362	9.96557	9.93165	9.93191	9.97137	9.76177	10.1464	10.06
P08003	3	Pdia4	0.00286148	5.13702	4.39884	5.21446	5.43415	4.86229	4.17206	4.46827	4.52838	3.94145	3.96234	4.18899	4.38285	4.67302	4.04587	4.34427	4.30871	4.05444	3.02155	4.06981	4.14869
P08113	5	Hsp90b1	0.0321289	7.37168	7.54474	7.80028	7.85782	7.25107	7.85845	8.14576	8.24142	7.61069	7.92218	8.13325	7.65523	9.38394	8.6497	8.19164	7.93492	7.79127	7.68478	8.12315	8.11009
P08228	6	Sod1	0.00237751	5.83137	4.94228	5.80754	5.89015	5.52562	4.72879	4.94296	5.01629	4.94751	4.83023	5.03297	5.33318	5.37422	5.56451	5.2671	5.80118	6.05949	5.71299	5.2599	5.43904
P08249	6	Mdh2	0.000122457	9.21909	9.0886	9.48341	9.6192	9.09552	9.36496	9.13702	8.66825	8.68972	8.94973	9.69354	9.06322	9.52847	9.25659	10.0298	10.521	9.73373	10.078	10.5052	10.4931
P08414	8	Camk4	2.94566e-05	9.02719	8.76444	9.03227	8.40984	7.97978	9.86366	10.498	10.6353	10.3313	10.0793	9.66964	9.17515	10.0978	10.1445	9.94263	9.39611	9.07346	8.80113	9.37047	9.36502
P08551	5	Nefl	2.89301e-07	7.93821	6.28654	9.0908	8.35453	8.59211	10.2866	10.2663	11.1707	10.58	10.7752	11.3083	12.3623	12.0748	11.4387	11.9935	11.9706	12.0559	12.0705	11.8073	11.7576
P08553	5	Nefm	6.64897e-08	8.3887	7.92234	9.89264	8.96088	9.41271	11.0015	10.9421	11.9828	11.3465	11.3119	11.9459	12.8146	12.7352	12.098	12.6947	12.4449	12.5477	12.5359	12.2897	12.1552
P08556	7	Nras	0.154073	4.27408	4.44024	4.71856	4.25847	4.26109	4.75808	4.11224	3.73904	4.57646	4.64314	4.39267	4.87595	4.77809	4.74348	4.81678	4.2541	4.33561	4.36567	4.33522	4.63224
P08752	4	Gnai2	1.9372e-07	8.41998	8.52525	8.54929	8.26466	8.32745	8.30551	8.37131	8.42644	8.37237	8.20136	8.0086	8.02663	7.93781	7.89296	8.11784	7.8408	7.81911	7.82496	7.86531	7.90916
P09103	3	P4hb	0.00019771	7.74597	7.70542	8.14052	7.7865	7.88793	7.49194	7.41689	7.33741	7.15525	7.41735	7.53796	7.49388	8.10706	7.77408	7.41385	7.13394	7.1414	7.23477	7.17941	7.27497
P09405	3	Ncl	2.03133e-06	9.83463	9.53678	9.35047	10.0802	9.94092	8.19811	8.24556	8.13397	8.60667	8.72261	8.13508	8.87295	8.64446	8.68917	8.31662	8.25749	8.64533	8.57449	8.40703	8.4572
P09411	6	Pgk1	1.59555e-05	8.71716	8.41272	9.32209	9.19617	9.01124	8.85375	8.97109	8.8619	8.47125	8.67606	9.36407	9.28177	9.46592	9.10141	9.91237	10.3761	9.74147	9.91937	10.2955	10.2601
P09528	5	Fth1	0.000501263	3.24339	3.59159	4.39065	4.0227	4.40891	4.17328	3.91093	4.4198	4.36587	3.95944	4.46528	4.84255	4.41683	4.40796	4.65007	4.99583	5.37384	4.77039	5.03998	4.88405
P09671	1	Sod2	0.0051588	4.0096	3.4605	4.86663	3.45476	3.04118	4.21818	4.85372	5.15945	4.12806	4.47381	4.92317	2.62423	5.00242	4.88394	5.3484	6.30977	5.69301	5.25044	5.95129	5.62819
P0C027	4	Nudt10	5.98604e-07	5.68876	4.97285	5.26239	5.25286	5.43097	4.95002	5.29749	5.21887	4.88412	4.63805	4.40038	3.50992	3.93294	4.23559	4.345	3.64	3.66519	3.75065	3.86501	3.86226
P0C0A3	6	Chmp6	6.2134e-05	3.90376	4.1441	3.94802	3.93588	4.11531	3.06343	2.76146	3.04162	3.46501	3.41578	3.21139	3.18048	3.34864	3.44546	3.57146	3.685	4.0179	4.19706	4.38803	3.63921
P0C7L0	6	Wipf3	1.10036e-06	4.56141	4.43917	4.66522	4.95766	5.08327	4.9803	4.74418	4.69196	5.20056	5.37489	5.41582	5.93943	6.0204	5.85155	5.81067	5.84588	6.62201	6.19378	6.36189	6.31156
P0DP27	2	Calm2	0.00590966	6.39938	5.92584	6.23111	6.45773	6.42781	6.29328	6.58304	6.68848	7.07127	6.95491	6.67351	7.71741	7.19436	7.00676	6.82744	6.41762	6.58967	6.78199	6.59657	6.78569
P10126	4	Eef1a1	3.17579e-05	10.6108	9.88798	10.1168	9.94982	9.46354	9.20747	10.0869	9.83243	9.50622	9.43797	8.7602	8.2352	9.16792	8.89966	9.05177	8.88462	8.28584	8.18123	8.57329	8.60843
P10630	3	Eif4a2	0.0219989	5.09735	4.20644	4.86581	4.65536	4.77613	4.34461	4.47802	4.48355	4.44729	4.48545	4.70257	4.73956	4.94465	4.2563	4.69795	4.28157	3.92059	4.29809	4.26397	4.45501
P10637	4	Mapt	2.01633e-06	11.5663	11.4621	11.3584	11.0671	11.0037	11.6548	11.833	11.4664	11.8056	11.8895	11.1586	10.6125	10.8666	11.1802	10.9213	10.5166	10.681	10.2516	10.5418	10.6081
P10639	8	Txn	0.000921641	8.52741	8.33258	8.78481	8.35392	8.19333	8.88375	9.4314	9.76051	9.1375	9.03075	8.52394	7.87482	8.83255	8.95736	8.58803	8.44693	8.28151	7.74943	8.30562	8.11
P10649	6	Gstm1	5.29425e-07	6.12518	5.82733	6.18192	6.1851	6.26032	5.80032	5.47516	5.42441	5.41928	5.58297	5.60385	5.59607	5.80139	5.36958	6.43424	7.38249	6.99789	6.99289	7.72889	7.55424
P10711	3	Tcea1	3.18117e-06	5.64195	5.35403	5.56989	6.64048	6.62176	4.76934	4.56165	3.98092	4.07837	4.44469	4.00502	4.11465	4.30397	3.78267	4.07017	4.1952	3.67221	4.2002	3.46199	3.96549
P10852	6	Slc3a2	0.00216991	5.8586	5.94296	6.58248	6.29056	6.02954	6.05258	6.35097	6.04436	5.61296	5.87055	6.23942	5.61249	6.3983	6.26648	6.69687	7.09557	6.4606	6.76599	7.16575	7.05586
P10922	7	H1-0	2.00088e-06	10.85	9.98856	10.1626	10.6345	10.3043	8.7454	8.89331	9.11565	9.20589	8.85692	8.81805	9.26986	9.55787	9.59197	9.51747	10.127	10.0054	9.92171	10.1727	10.1662
P11352	3	Gpx1	8.71831e-05	6.21197	6.32865	5.92907	6.40088	6.465	5.54235	5.42433	4.77443	5.27521	5.48858	5.54837	5.49739	5.30412	5.35522	5.2177	4.94385	5.44581	5.56345	5.60517	5.7308
P11798	5	Camk2a	2.35327e-08	4.66237	4.67053	7.53021	7.07041	6.86616	9.9594	9.9032	10.7761	10.0557	10.2127	11.2744	11.5931	11.4009	11.6525	11.6092	11.7774	12.0857	12.001	12.0444	11.9588
P11881	5	Itpr1	2.45808e-09	6.81847	7.16325	8.09426	7.59176	7.57684	8.76306	8.69867	9.24768	8.72322	8.86642	9.73036	9.81555	10.2685	10.0421	10.1017	10.4244	10.4837	10.3542	10.5576	10.5717
P11983	3	Tcp1	3.73671e-08	8.95896	8.66615	8.78884	8.97719	8.79398	8.24009	8.35051	8.27829	8.1623	8.29917	8.04414	7.97471	8.18902	7.97446	8.13935	7.92364	7.84016	8.03755	8.08765	8.1406
P12367	1	Prkar2a	0.00139179	6.92075	7.27878	7.21041	6.97706	6.96833	7.54076	7.39282	7.17501	7.39882	7.55505	7.09285	6.83436	6.99932	7.0844	7.10778	7.28629	7.3718	7.13375	7.23862	7.23593
P12382	6	Pfkl	5.66505e-09	7.4362	7.23833	7.73579	7.46279	7.59436	7.84863	7.92205	8.08483	7.84413	7.9773	8.25629	7.71335	8.67157	8.43967	8.5539	9.58283	9.63636	9.53859	9.75085	9.71687
P12658	1	Calb1	0.147586	3.40798	3.95574	4.05025	3.83824	3.91675	3.56141	4.4267	5.22258	3.7368	3.94692	3.78335	3.90272	5.63385	4.31078	3.94874	4.78621	5.17438	4.28133	4.63441	4.61019
P12849	1	Prkar1b	0.00361353	5.11595	4.17875	4.92369	4.83917	4.01027	5.12681	5.43996	5.71352	5.80555	5.74977	4.95499	5.00314	5.09741	5.46153	5.24403	4.87497	5.05762	4.7546	5.38257	5.17537
P12960	1	Cntn1	0.0038317	7.62676	7.8669	8.34172	8.15387	7.9958	8.34939	8.34076	8.1981	8.18078	8.20939	8.36867	8.17063	8.37584	8.2415	8.72867	8.58915	8.33281	8.47129	8.65197	8.85071
P12970	3	Rpl7a	0.000337159	6.40358	6.46699	5.9812	6.57395	6.69688	4.58724	4.54844	5.13443	5.47895	5.56245	4.59408	5.6512	5.28063	5.39416	5.31974	4.91669	5.87481	5.75519	5.30649	5.42319
P13020	6	Gsn	8.46356e-05	3.73636	1.66006	3.56079	2.66598	3.67866	3.95023	3.99608	4.48443	3.82321	3.82404	4.88362	5.08095	5.3356	4.69628	5.69923	5.20629	4.84441	4.46469	5.10759	4.81196
P13595	8	Ncam1	0.000628306	10.8414	10.7731	10.7866	10.8084	10.4447	10.5269	10.8533	10.9327	10.9622	10.4809	10.2714	10.2115	10.6605	10.632	10.7076	10.2594	10.0644	9.94044	10.25	10.164
P14094	5	Atp1b1	2.91521e-07	7.21822	8.17184	8.64813	8.45431	8.1118	9.28328	9.3135	9.58565	9.37224	9.273	9.96952	9.12813	10.2683	10.3854	10.3802	10.7729	10.7309	10.8529	11.2618	11.0156
P14115	3	Rpl27a	4.61717e-06	6.53733	6.33865	6.08878	6.43644	6.47085	4.55843	4.55107	4.12594	4.73304	4.55176	3.03721	4.70343	4.81281	4.51873	4.51685	4.25055	5.01665	4.38905	4.3888	4.23757
P14131	3	Rps16	6.68054e-07	8.21304	7.95014	7.70801	7.8619	7.50163	6.03311	6.57478	6.75351	6.80954	6.5822	5.96921	6.76888	6.62293	6.61689	6.43996	5.8307	6.04227	5.92715	6.40018	6.2231
P14148	3	Rpl7	5.41296e-05	7.76951	7.73798	7.33657	7.85137	8.0109	6.78885	6.54542	6.57343	6.83059	6.76988	6.24526	6.55419	6.96299	7.18895	6.77684	6.49939	6.8928	6.90575	7.20085	6.92134
P14152	6	Mdh1	4.95804e-06	8.69357	8.04374	9.20073	8.94727	8.56566	9.06243	9.13387	9.12369	8.85882	9.00781	9.49524	9.27673	9.66808	9.48049	10.0375	10.4407	10.0016	9.94161	10.4145	10.3017
P14206	3	Rpsa	5.82558e-08	6.80885	6.63802	6.9558	6.99503	6.85972	6.00431	5.94283	5.37668	5.28172	5.6602	5.39779	5.07143	5.31685	4.87383	5.46676	5.01136	4.52974	4.96809	5.13421	5.10344
P14231	1	Atp1b2	0.000162845	4.84639	5.44957	5.54756	4.99867	4.60795	6.24623	6.33649	6.35206	6.18522	5.78463	6.74133	6.70201	7.01931	6.7324	7.44332	6.24082	6.10836	6.2876	7.89642	7.51831
P14685	3	Psmd3	0.00188254	9.15816	9.09913	9.05369	9.20264	8.90564	8.65216	8.79772	9.0146	9.06966	8.63572	8.57451	8.42383	8.72211	9.0075	8.82112	8.34264	8.55648	8.53828	8.71129	8.58153
P14733	3	Lmnb1	1.21377e-09	11.7337	11.4795	11.241	12.0132	11.7237	9.78332	9.51985	8.87562	9.35915	9.54125	8.97549	8.91318	8.93199	8.5248	9.02963	8.81945	8.34173	8.53059	8.75055	8.96527
P14824	5	Anxa6	1.83011e-08	8.39217	8.25845	8.7522	8.23081	8.26348	9.09804	9.21971	9.46859	9.19854	9.18418	9.26962	9.43191	9.7962	9.51893	9.62738	9.97482	9.90493	9.80092	10.2196	10.016
P14869	3	Rplp0	0.000422085	8.36471	7.92151	8.58841	8.40115	7.77057	7.77262	7.46166	6.83226	7.25971	7.58141	7.59725	7.30332	7.28043	6.85475	7.77023	7.47162	6.49957	6.56073	6.93126	6.94076
P14873	4	Map1b	2.99781e-08	14.7017	14.5294	14.1231	14.0761	13.6676	13.751	14.1085	13.6029	14.0387	13.8326	12.6386	12.6687	12.6794	12.5808	12.3926	12.3341	12.7146	12.2845	12.237	12.3564
P15105	5	Glul	7.78654e-07	7.00041	6.86475	8.19966	7.59684	7.84114	8.81536	8.88634	8.95629	8.41066	8.63276	9.32999	8.8892	9.804	9.40349	10.1948	10.6177	9.7786	9.92639	10.6347	10.6395
P15116	6	Cdh2	0.000581488	7.53566	7.76221	7.67785	7.7012	7.92939	7.39574	7.04322	6.83739	7.24657	7.35641	7.57301	7.36102	7.27053	7.26576	7.48767	7.53871	7.4794	7.62525	7.7045	7.81482
P15532	6	Nme1	0.0106294	8.71051	8.54983	8.79671	9.02202	8.92127	8.55216	8.38733	8.23112	8.57699	8.72874	8.71435	8.85393	8.73798	8.69348	8.92121	9.07682	8.65128	8.83248	9.05202	8.89052
P15864	7	H1-2	4.8959e-06	7.946	6.77867	6.48262	7.19016	7.28523	4.78755	4.63522	4.06639	5.15253	5.17255	5.15408	6.21781	5.55829	5.59027	5.46278	6.23242	5.76011	6.03697	5.98068	5.56993
P16054	1	Prkce	3.13418e-05	8.7662	8.93903	9.01474	8.84845	8.75346	9.07274	9.36459	9.65346	9.43651	9.41775	9.34818	9.23542	9.48763	9.58935	9.71474	9.48611	9.68308	9.43085	9.68824	9.60549
P16125	5	Ldhb	3.1003e-06	7.82268	7.73725	8.23961	7.80369	7.47424	8.58778	8.73796	8.9849	8.30133	8.29363	8.93912	8.54233	9.49787	9.28653	9.82914	10.1925	9.66191	9.40958	10.4207	10.2551
P16283	1	Slc4a3	2.86113e-05	4.8973	4.54787	5.32407	4.51588	4.53878	5.48612	5.80294	6.12284	5.97843	5.60851	5.3535	5.50706	6.03675	6.14929	6.19105	6.2439	6.66591	5.82919	6.67642	6.45766
P16330	5	Cnp	2.34309e-08	3.47554	3.02727	6.91284	4.09019	6.09608	8.44397	8.18087	9.56386	8.33981	8.89309	10.9747	11.2577	11.6464	11.1453	12.3603	12.5228	12.0733	12.2752	12.4988	12.5931
P16460	5	Ass1	4.7193e-05	1.96028	3.57913	4.7436	5.25593	4.18586	5.95021	5.72072	5.54727	5.03307	5.8537	6.13098	6.02146	5.94508	5.6823	6.1068	7.2196	6.81269	6.83952	7.06897	7.04852
P16546	5	Sptan1	1.4135e-08	12.5355	12.2786	12.5524	12.5109	12.3314	13.0556	13.0957	13.3394	13.2521	13.3204	13.3523	13.5263	13.6314	13.5969	13.5135	13.5442	13.6331	13.2581	13.6536	13.6031
P16858	6	Gapdh	1.33339e-07	8.9938	9.1283	9.72853	9.68168	9.31533	9.61566	9.64954	9.52635	9.22863	9.6051	10.3822	10.0842	10.4614	10.1425	10.6715	11.0596	10.7539	10.8245	11.1821	11.0837
P17156	5	Hspa2	1.4825e-07	3.94175	4.25247	4.27635	4.74806	5.57022	5.12069	4.88423	5.94899	5.40505	5.50823	6.77721	7.40531	6.60851	6.85183	6.90482	7.36176	7.43124	7.06071	7.293	7.23989
P17182	6	Eno1	0.000561824	9.26932	8.53431	10.5882	9.98755	9.8939	9.76857	10.0816	10.1934	9.61774	9.97821	10.6034	10.3151	10.2342	10.3263	10.9993	11.5783	11.1311	11.0167	11.0557	11.0653
P17426	5	Ap2a1	1.43533e-08	6.656	6.82234	7.45128	7.18562	7.07946	7.93277	8.12234	8.3115	8.22198	8.21174	8.58025	8.16222	8.70239	8.81861	8.82061	9.12165	9.18379	8.97505	9.46586	9.34679
P17427	5	Ap2a2	3.26973e-07	6.80805	6.93218	7.19717	6.50947	6.94261	7.81751	8.00347	8.07178	7.99786	7.87431	8.07887	7.5583	8.19076	8.34837	8.34268	8.42677	8.38251	8.31655	8.84779	8.76215
P17710	5	Hk1	2.19446e-09	9.49158	9.64175	10.236	10.1247	10.0191	10.5185	10.459	10.7374	10.6893	10.7041	11.1886	11.0391	11.528	11.5025	11.46	12.1484	12.1801	12.1701	12.4813	12.3211
P17742	7	Ppia	0.000216234	10.5641	10.0103	10.6568	11.0469	10.5882	9.79682	9.99005	9.46697	9.49038	9.71138	9.95652	9.43158	9.72323	9.6321	9.81028	10.1316	9.60773	9.58499	9.62917	9.79147
P17751	5	NA	7.26828e-08	8.09161	7.88027	9.011	8.96075	8.59481	9.20851	9.13068	9.41521	9.06701	9.29161	9.95667	10.1729	10.3091	9.88989	10.4601	10.8269	10.7628	10.6086	10.6737	10.5946
P18572	5	Bsg	9.72e-06	8.17508	8.63995	9.01794	8.80372	8.57211	9.41248	9.30706	9.3121	9.40381	9.24711	9.74757	9.40398	9.86652	9.83035	9.92476	9.27303	9.17488	9.51375	9.68468	9.47946
P18760	3	Cfl1	3.43998e-05	10.9935	10.4946	10.9534	11.1036	10.3797	9.70627	10.097	10.0512	10.0567	9.85	9.73919	9.98214	10.1298	9.80661	9.89483	10.1276	9.6193	9.27785	9.48324	9.7394
P18872	5	Gnao1	5.32846e-08	9.5574	9.49972	9.8345	9.67143	9.38421	10.0882	10.0864	10.0706	10.0285	10.303	10.2531	10.1713	10.2488	10.2822	10.3152	10.6114	10.5321	10.367	10.593	10.6185
P19096	4	Fasn	9.80785e-10	12.4751	12.3893	12.2335	12.0389	12.0647	11.9955	12.1448	11.7856	12.0188	12.0433	11.1534	10.5219	10.9626	11.0031	10.6899	10.4172	10.3915	10.3394	10.1879	10.305
P19157	6	Gstp1	6.7019e-06	6.08186	5.97095	6.08249	6.15146	6.12551	6.16536	5.92813	5.62844	5.95072	6.19314	6.11232	5.58982	5.84846	6.01327	5.93502	6.63922	6.72244	6.76318	6.59643	6.67141
P19246	5	Nefh	6.98692e-09	5.68274	4.74034	6.96254	6.15162	6.34515	8.69784	8.60321	9.66724	8.87955	9.11017	9.76759	10.6841	10.8465	10.0274	10.8298	10.8511	10.8777	11.2544	10.9345	10.6961
P19536	5	Cox5b	0.000171282	6.97316	6.48401	7.03688	6.99813	7.98046	6.77139	6.47778	6.70864	7.27782	7.3247	7.62428	9.23418	8.30338	8.31863	7.89113	8.28109	8.72485	8.57852	8.15809	8.26891
P19783	6	Cox4i1	1.77891e-06	5.89396	6.48993	6.39036	6.59564	6.71512	6.45657	5.87496	5.82879	6.14965	6.6299	7.04049	7.22233	6.87666	6.97853	7.1911	7.43913	7.48972	7.95969	7.871	7.90263
P20029	3	Hspa5	0.00626275	8.80297	8.3068	8.76311	9.09299	8.37832	8.08897	8.22529	8.21634	7.81108	8.05263	7.99957	8.24477	8.70796	8.19853	8.4077	8.22991	7.90456	7.92926	8.09867	8.32081
P20108	6	Prdx3	1.46926e-07	5.97434	5.87443	6.32546	6.35666	6.21019	5.95182	5.64825	5.913	6.02641	6.00365	6.37223	6.61276	6.55888	6.50039	6.58047	7.02419	6.78806	7.05383	7.09654	7.02482
P20152	3	Vim	9.32594e-06	9.32843	8.82223	9.24441	9.05391	8.81045	7.63527	7.6739	8.3133	8.09747	8.01826	7.83273	8.17767	7.65601	7.15633	8.61952	7.54453	7.12729	7.11794	6.8802	7.25985
P20444	6	Prkca	8.25888e-05	6.44476	5.81207	6.29023	6.23455	6.31984	6.85831	6.49087	6.32981	6.74899	6.80471	6.57593	6.14189	6.84292	6.7671	6.77858	7.21037	7.3701	7.06362	7.24658	7.13283
P21107	4	Tpm3	0.0011617	7.87949	8.23086	8.31282	7.73199	7.66203	8.00561	8.23131	8.48437	8.31056	8.31262	7.63868	7.9703	8.05105	7.95375	7.95236	7.37724	7.77757	7.38259	7.6814	7.62576
P21126	7	Ubl4a	0.00172152	5.81579	5.84391	6.33759	6.46663	6.41336	5.90526	5.29589	5.16372	5.43356	5.75845	5.73808	5.7604	5.39315	5.49046	5.75021	5.59409	5.38268	5.5667	5.4086	5.5324
P21278	3	Gna11	0.000212654	7.43796	7.19809	7.65823	7.35064	7.65809	7.32783	7.13635	6.85862	7.24695	7.45561	7.07265	7.188	7.1165	6.81423	7.05343	6.85293	6.75356	6.83359	6.69273	6.85151
P21279	4	Gnaq	2.27857e-06	9.18654	8.92918	8.85118	8.79916	8.51227	8.73741	8.94981	8.72996	8.87644	8.77829	8.4333	8.26032	8.47434	8.48597	8.54674	8.14346	8.06207	7.92413	8.1445	8.10561
P21460	7	Cst3	0.000729742	6.92662	7.05579	7.24088	7.5697	7.51728	6.95677	6.67894	6.56037	6.82477	6.86114	7.17108	7.36774	7.77036	7.22016	7.16326	6.72476	6.7939	6.91745	6.68097	6.78302
P21619	7	Lmnb2	5.50929e-06	8.2386	7.97825	8.1274	8.90949	8.4294	7.11703	6.95099	6.5277	6.93195	7.04705	7.00927	7.14765	7.14484	6.73938	7.30931	7.47184	7.29231	7.23956	7.8627	7.83167
P22437	5	Ptgs1	0.00188232	3.00538	2.83967	4.13215	4.65345	3.92208	4.65358	4.8135	4.42356	4.39272	4.36095	4.85455	5.03495	6.38899	5.35502	4.95823	4.66392	4.64575	5.03085	4.63058	4.88134
P22682	1	Cbl	0.0362267	4.96656	4.77903	4.37818	4.61102	3.31046	4.9952	5.28782	5.26595	5.16849	5.24362	4.8647	3.87528	4.62867	4.52181	4.59208	4.95917	4.91141	4.57639	4.55018	4.32651
P22892	1	Ap1g1	0.0790206	5.2433	4.67267	4.75121	4.16813	4.78339	5.07668	5.83779	6.13797	5.25449	5.08578	5.17817	4.29272	5.55585	5.44853	5.41508	5.36816	5.20898	4.88894	5.57231	5.22854
P23116	3	Eif3a	1.32031e-05	7.41775	7.59695	7.18652	7.77739	8.05632	6.81644	6.50523	6.3388	6.72711	6.87058	6.67157	6.94221	6.8909	6.73137	6.5001	6.22581	6.27578	6.75622	6.4607	6.48728
P23506	1	Pcmt1	0.00106455	7.77448	7.42855	8.03461	8.0716	7.63236	8.06903	8.69161	9.02282	8.17044	8.08027	8.47462	7.96519	8.59344	8.6001	8.95943	9.43528	8.72606	8.51199	9.41631	9.17066
P23818	5	Gria1	1.5264e-05	5.07376	5.06567	5.82947	5.90909	5.56298	6.02353	5.90465	6.31049	5.99392	6.03661	6.26876	6.02593	6.29494	6.19196	6.42271	6.56548	6.6523	6.6667	6.59354	6.7161
P23819	5	Gria2	7.33059e-05	4.59815	5.8297	5.94048	5.32728	5.79961	6.22587	6.13894	6.39094	6.25024	6.44325	6.70881	6.44287	6.81859	6.72818	6.73941	6.59256	6.49762	6.60557	6.7728	7.01762
P24270	3	Cat	5.18913e-06	5.85342	5.43108	5.90701	5.48489	5.49346	4.73625	4.82972	4.77251	4.87999	5.14834	4.77995	4.68825	5.19121	4.79002	4.81434	4.66818	4.26789	4.46012	3.89627	4.55718
P24369	3	Ppib	0.00862444	5.77646	6.0306	5.86291	6.12056	5.59638	5.89242	5.45238	5.05754	5.78122	5.30461	5.79839	5.3596	5.72551	5.99187	5.59349	5.23391	5.47712	5.32554	5.22026	5.01441
P24527	1	Lta4h	0.000614976	6.82483	6.70587	7.21604	6.95035	6.50494	7.12708	7.22512	7.4979	7.42576	7.14514	7.1767	7.03986	7.48569	7.44133	7.57194	7.64747	7.53802	7.30663	7.77876	7.74802
P24529	5	Th	3.9425e-07	4.57255	4.85373	4.40392	3.85621	4.24986	5.52062	5.54112	5.74459	5.347	4.99453	6.13298	6.04279	5.93999	5.53855	6.07388	6.86573	6.58756	6.43823	6.36374	5.98077
P24547	4	Impdh2	0.000314631	5.85093	5.52535	5.9695	5.89875	5.77348	5.97752	6.56108	6.17257	5.93309	6.11424	6.13074	5.46329	5.46843	5.41997	5.46779	5.5284	5.42714	4.79123	4.89572	5.07275
P24549	6	Aldh1a1	0.00201011	8.25898	7.40875	7.92755	7.35054	7.10673	7.89674	8.06715	8.16216	8.18279	7.85965	8.03636	8.1173	9.74441	8.47133	8.75335	9.26818	9.42683	8.23045	10.1861	9.09554
P24668	5	M6pr	0.00589269	1.92653	3.55918	3.85042	4.22707	3.09451	3.86	4.18832	3.9839	4.38374	3.85457	4.73339	4.2469	4.57566	4.21671	4.87408	4.42014	4.36538	4.55619	4.68505	4.33753
P25444	3	Rps2	6.04956e-07	9.91606	10.2631	9.60884	9.90124	9.74014	8.90252	8.85754	8.65004	9.22627	8.95439	8.76137	8.81235	8.8587	8.94744	8.88016	7.97942	8.17103	8.62933	8.7127	8.50326
P26040	7	Ezr	3.39996e-05	8.55094	7.96816	8.4956	8.55619	8.65152	7.42618	7.18081	6.82367	6.87822	7.11628	7.70328	7.454	7.54525	7.0963	7.99312	8.33025	7.52463	7.71952	7.81787	8.1485
P26443	6	Glud1	0.00274533	9.61182	9.33568	10.3607	10.0566	9.62945	10.1408	10.2175	10.0669	9.88937	10.2052	10.3551	9.8259	10.4757	10.1506	10.8863	10.9248	10.3214	10.5561	11.055	11.1405
P26450	3	Pik3r1	0.000125473	7.37165	7.76781	7.53176	7.53761	7.77525	7.68049	7.3214	7.19946	7.53727	7.66059	7.34281	7.66638	7.00715	7.27901	7.00124	6.62302	6.9348	6.88555	6.52377	6.85493
P26638	3	Sars1	7.33919e-05	7.84901	7.60614	7.92128	7.84876	7.74934	7.53279	7.55833	7.20645	7.33176	7.46299	7.23265	6.73335	7.07299	7.07367	7.3039	7.35898	7.16705	7.04575	7.306	7.45988
P26645	3	Marcks	1.18348e-07	10.9405	10.8846	10.5785	10.7001	10.3892	9.31484	9.39351	9.3334	9.76574	9.39347	8.76889	9.63525	9.42979	9.48954	8.94574	8.86339	8.82946	9.02584	8.91706	9.05152
P27546	4	Map4	1.05658e-09	11.4136	11.1303	11.1559	11.0359	10.6665	10.8062	11.1478	10.9819	11.4881	11.147	9.74636	9.34974	9.89616	10.0865	9.6321	7.63202	7.8889	7.84661	6.79663	7.83919
P27601	6	Gna13	0.0013529	5.64943	5.23455	6.06834	5.82657	5.89952	5.87416	5.98218	5.58494	5.97699	6.0153	6.40065	6.23254	5.90191	5.8169	6.18515	6.65689	6.46102	6.39716	6.33789	6.36562
P27612	8	Plaa	8.42016e-06	9.03475	8.89794	9.0352	8.93626	8.92071	9.30778	9.31862	9.37637	9.46871	9.44793	9.36157	9.08764	9.10708	9.35128	9.21665	9.03666	9.11164	8.99734	9.09034	9.02691
P27659	3	Rpl3	0.000108115	8.25023	8.40134	7.97927	8.38616	7.96706	7.37038	7.73919	7.9544	7.81618	7.50958	7.36604	7.03374	7.63317	7.98306	7.45796	6.98923	7.06898	7.04223	7.41107	7.21993
P27671	5	Rasgrf1	0.0001145	1.20414	2.30336	3.52246	2.77662	4.29709	4.7516	4.32137	4.85477	4.56139	4.89367	5.04799	5.42895	5.23197	4.94916	5.1695	5.0535	5.49534	4.87111	4.69029	5.00828
P28028	5	NA	2.37833e-06	2.45714	3.63662	4.42106	3.89031	3.83692	5.18217	4.94634	5.27905	5.11511	5.20656	5.66327	5.44959	5.50009	5.25479	5.40453	5.52548	5.83089	6.10791	5.78232	5.92499
P28184	5	Mt3	8.2056e-06	2.77562	1.78378	5.47579	4.3702	5.22899	6.72778	7.10067	7.76032	6.85608	6.86538	7.82737	8.52483	8.1381	8.16022	8.07511	7.42001	7.49207	7.37894	7.18943	7.05734
P28271	3	Aco1	1.55587e-08	6.9082	7.00429	6.91302	6.75708	6.9002	6.52932	6.51614	6.26216	6.49303	6.55505	6.19644	6.07962	6.17001	6.14907	6.12364	5.89882	5.67649	6.02062	5.98106	6.0803
P28352	3	Apex1	2.29791e-08	5.98998	5.64726	5.63972	6.2116	5.96184	4.60544	4.82239	4.58325	4.70556	4.9595	4.46379	4.31275	4.39802	4.03276	4.63417	4.50384	4.34069	4.16392	4.36927	4.50311
P28474	3	Adh5	0.00302661	9.05538	8.60729	9.03512	8.76864	8.4402	8.55464	8.66865	8.46745	8.45191	8.40025	8.34315	7.72608	8.25193	8.11887	8.47157	8.45232	7.9692	8.13515	8.33415	8.30329
P28652	5	Camk2b	1.55587e-08	8.7846	9.06626	9.46589	9.5168	9.19661	10.5143	10.3666	10.3426	10.5639	10.7514	10.82	10.8049	10.8153	10.9712	10.6416	10.2665	10.405	10.442	10.3671	10.3367
P28656	3	Nap1l1	0.0310785	5.55758	5.48803	5.78653	5.86149	5.73485	5.41498	5.31858	5.45175	5.55265	5.63615	5.56488	5.81297	5.14053	5.41537	5.38711	5.37981	5.22916	5.45484	5.04582	5.36903
P28660	1	Nckap1	1.88365e-06	7.80003	8.04954	8.24759	7.63623	7.7968	8.58961	8.65214	9.13384	9.03975	8.90124	8.76316	8.79066	9.1166	9.02691	9.20525	9.14982	9.01906	8.85909	9.4113	9.20391
P28663	5	Napb	1.83372e-07	6.81479	7.26501	7.80236	7.09649	7.57569	8.0425	7.85478	7.86127	7.79501	8.03061	8.49183	8.4025	8.17925	8.41593	8.68155	9.07353	8.80367	8.85339	8.97918	9.00762
P28667	4	Marcksl1	2.64828e-10	10.4777	10.5919	9.89383	10.123	9.80365	9.28522	9.26297	9.00411	9.66495	9.35189	8.67581	8.7652	8.77622	9.1706	8.6635	6.2214	6.23374	6.77638	6.00123	6.41225
P28738	4	Kif5c	6.51588e-07	11.0259	10.8995	10.6149	10.7295	10.784	10.8164	10.7558	10.4596	10.7731	10.881	10.4491	10.2145	10.0982	10.2695	10.038	10.0079	10.1292	9.99517	9.91764	9.89878
P28740	4	Kif2a	5.83526e-07	10.1917	10.3915	10.3068	10.3043	10.2437	10.5787	10.5394	10.4849	10.6599	10.803	10.3415	9.99705	10.1037	10.338	10.0784	9.76143	9.95547	9.81667	9.85899	9.87912
P28741	3	Kif3a	1.54138e-08	6.28572	6.32939	6.28004	6.14862	6.39995	5.37818	5.27489	4.88565	5.51253	5.48517	4.85513	5.0577	5.05042	4.71014	4.85322	5.0431	4.92274	4.93791	4.8369	5.16875
P29341	3	Pabpc1	1.42641e-07	10.443	10.492	10.2446	10.6248	10.5395	10.0429	9.86608	9.5737	9.97061	10.1169	9.8093	9.70082	9.74531	9.6308	9.50173	9.26741	9.40723	9.49447	9.39672	9.37863
P30275	5	Ckmt1	8.50211e-06	5.08013	5.52388	7.7905	7.71142	7.37397	8.63126	8.65887	8.43471	7.78974	8.38541	9.5933	9.09107	9.47151	9.07644	9.87598	10.579	10.0232	10.0167	10.3486	10.3973
P30416	3	Fkbp4	2.90594e-06	7.8668	7.6441	7.59542	7.73433	7.36089	6.86549	7.00983	6.68782	6.88374	6.78999	6.85519	6.26071	6.89531	6.45244	6.68514	7.03349	6.87385	7.04386	7.05616	6.88049
P30999	4	Ctnnd1	8.25573e-06	9.41593	9.46378	9.42598	9.50045	9.64619	9.86258	9.7379	9.97315	10.0929	10.1841	9.95748	9.78728	9.60587	9.99297	9.68892	9.27044	9.42392	9.35051	9.22518	9.21701
P31230	3	Aimp1	0.000233645	6.3983	6.3573	6.56593	7.10684	6.86118	6.20684	6.09543	5.75242	5.91738	5.94032	6.06064	5.80845	6.15031	5.7091	6.16686	6.10121	5.48427	5.80919	5.60265	5.79973
P31324	4	Prkar2b	0.0216773	7.65787	7.94703	8.01164	7.95359	7.77203	8.11454	7.85423	7.58954	7.89479	8.18017	8.07982	7.87431	7.64085	7.65806	7.64521	7.75777	7.36325	7.53584	7.46242	7.53484
P31648	5	Slc6a1	1.88912e-05	5.52715	5.82682	5.99019	5.60453	6.24534	6.42852	6.0792	6.51626	6.51795	6.5415	6.70593	6.39255	7.16815	6.91982	6.85757	6.75713	6.85798	6.82289	7.0724	6.91953
P32020	3	Scp2	1.26192e-05	7.31846	6.95981	7.52298	7.48985	6.7631	6.65686	6.67321	6.59389	6.27761	6.54399	6.70873	6.55592	6.85886	6.94599	6.93005	6.22362	5.85856	6.22079	6.11344	6.14925
P32067	3	Ssb	3.48691e-07	7.77694	7.38785	7.13276	7.53553	7.4246	5.66951	5.91197	5.83947	6.14621	6.0588	5.2312	6.09108	5.97976	5.87853	5.78912	5.39742	5.97551	6.15562	5.97958	6.12766
P32883	7	Kras	0.13734	4.1706	4.46983	3.37763	4.37531	3.96712	3.57382	2.95554	3.29956	3.84269	3.86189	3.51475	4.25117	3.68606	4.02583	3.72945	3.44349	3.66246	4.01715	3.86539	4.04595
P32921	3	Wars1	0.000143254	7.72525	7.89304	7.95375	7.70196	7.63605	7.63281	7.60995	7.64658	7.66952	7.69522	7.40335	7.45195	7.45987	7.50557	7.64694	7.39965	7.43391	7.37894	7.48899	7.53999
P33173	3	Kif1a	0.00104943	10.3755	10.5291	10.4014	10.3647	10.3982	10.4244	10.2457	10.1375	10.3715	10.5013	10.2425	10.3551	10.1632	10.2133	10.0632	10.0204	10.2291	10.1146	9.98691	9.99394
P33175	4	Kif5a	9.32289e-07	9.46532	9.42659	9.25396	8.82028	9.1328	9.35152	9.34535	9.08915	9.46607	9.50227	8.65653	8.91136	8.76139	8.6454	8.69522	8.30116	8.50793	8.45022	8.26837	8.289
P34022	3	Ranbp1	1.80039e-06	7.0342	6.30875	6.85505	6.79798	6.65371	5.99809	6.3719	6.22796	6.07826	6.11522	5.81345	5.5242	5.57477	5.46055	5.7807	5.85733	5.7891	5.30729	5.70131	5.74407
P34152	1	Ptk2	1.03374e-05	6.88877	6.72901	6.85529	6.63075	6.30851	7.10509	7.10505	7.24948	7.58645	7.35374	7.30201	7.19522	7.47425	7.62446	7.52658	7.68734	7.80066	7.40071	7.93025	7.81966
P34884	3	Mif	4.94179e-05	5.46893	5.47112	5.09686	5.91746	5.46422	4.86617	4.46969	4.08953	4.44136	4.46682	4.68162	5.02269	4.66996	4.68418	4.80728	4.54424	4.39093	4.7922	4.79844	4.84408
P35123	4	Usp4	1.45116e-05	7.65896	7.43599	7.41744	7.21651	7.43521	7.62218	7.67128	7.61015	7.691	7.7028	7.51	7.23771	7.36052	7.43818	7.27535	6.92291	7.27162	6.90705	7.01027	7.0688
P35235	6	Ptpn11	4.45437e-06	8.99497	9.03633	9.02691	9.0362	8.87776	8.97317	8.87965	8.84194	8.94685	9.03401	8.91749	9.03001	9.17929	9.01478	9.10689	9.42246	9.41407	9.25082	9.37221	9.3027
P35278	3	Rab5c	0.137733	3.98571	4.04934	4.20628	4.59307	4.58859	4.29551	4.2924	4.02893	4.20315	4.02976	4.16892	4.35706	3.99991	3.71187	3.79538	3.76383	3.74613	3.69208	4.24581	4.15819
P35279	4	Rab6a	0.280813	6.40566	6.30167	6.40372	5.95304	6.74588	6.38509	6.24358	6.17442	6.65908	6.43282	6.23776	6.04534	6.15429	6.27008	6.12698	6.2608	6.34588	6.29569	6.35925	6.72132
P35282	6	Rab21	2.25783e-05	5.85159	6.07039	6.12394	6.16879	6.40827	6.02432	5.75693	5.9399	6.00286	6.0567	6.27721	6.3343	6.29705	6.32092	6.33729	6.42031	6.50902	6.65107	6.56347	6.55249
P35283	4	Rab12	0.00567833	6.87356	6.52829	6.74844	6.58229	6.4445	6.56299	6.61424	6.76838	6.55989	6.51552	6.2314	5.92755	6.34855	6.50353	6.3426	6.46222	6.30332	6.19023	6.46963	6.37316
P35288	7	Rab23	0.00149684	5.85712	5.81205	5.6825	5.9092	6.1256	5.70658	5.20896	5.11399	5.50745	5.40445	5.16175	5.20232	5.43562	5.09338	5.55844	5.59139	5.33544	5.31319	5.6391	5.63313
P35293	3	Rab18	0.000816338	6.78372	6.6368	6.94761	6.72534	6.62726	6.68595	6.51466	6.26068	6.4383	6.31881	6.31184	5.60158	6.10768	6.23311	6.20585	6.18467	6.05689	6.25898	6.3723	6.47255
P35486	6	Pdha1	3.57072e-05	6.20265	6.12961	7.00432	6.69872	6.4847	6.91956	6.84185	6.44243	6.36376	6.95292	7.28304	7.02661	7.2524	6.87024	7.72827	8.16918	7.48065	7.63757	8.20412	8.31155
P35550	3	Fbl	5.39539e-09	7.06937	7.10629	6.89715	7.08434	7.43203	5.79252	5.53471	5.2188	5.67727	5.69204	5.12159	5.65742	5.13654	5.4011	5.15508	4.83881	4.95992	5.34664	5.03634	5.26224
P35700	5	Prdx1	0.000249889	9.13285	9.15659	9.35551	9.09027	9.07674	9.32235	9.4047	9.3465	9.66847	9.48006	9.48769	9.43201	9.68442	9.6884	9.67119	9.40714	9.38198	9.41468	9.4992	9.39517
P35762	5	Cd81	1.55587e-08	5.73865	5.68935	6.14895	5.97337	5.97825	6.28779	6.48909	6.97056	6.77023	6.60815	7.04641	6.71511	7.33778	7.50121	7.55375	7.98201	8.14202	8.03987	8.23232	8.04704
P35802	1	Gpm6a	6.16254e-05	6.79929	6.68351	6.42518	6.34699	6.28907	6.80835	7.11045	7.5876	7.50631	7.3155	7.23086	6.99691	7.76802	8.22711	7.74203	7.88235	7.86315	7.70732	8.46945	8.05537
P35803	1	Gpm6b	5.87522e-05	7.34784	7.19023	7.3423	7.18698	7.37952	7.854	8.21301	8.86652	8.30142	8.22472	8.13679	7.73684	8.41969	8.72549	8.38746	8.54978	8.41644	8.06608	8.63747	8.5173
P35831	3	Ptpn12	6.32518e-08	6.70368	6.90584	6.25517	6.48472	6.83489	6.55624	6.33249	5.92739	6.44819	6.45954	5.84442	5.77836	5.46682	5.57807	5.31711	4.89562	5.1532	4.85902	4.53485	4.76187
P35922	3	Fmr1	9.90383e-05	5.67866	5.32755	4.92561	5.11216	4.91598	4.01978	4.4623	3.55383	4.33231	4.36257	4.30779	4.05001	4.60417	4.3281	4.321	4.1536	4.07727	3.89743	4.27148	4.43192
P35979	3	Rpl12	8.74384e-09	9.83029	9.48552	9.33291	9.61003	9.40976	8.59217	8.82128	8.75245	8.87135	8.72121	8.17173	8.36353	8.42086	8.66227	8.48499	8.0854	8.09344	8.06475	8.26992	8.1931
P35980	3	Rpl18	2.89301e-07	8.98413	8.87188	8.51815	8.70346	9.03104	7.3539	6.99925	6.86093	7.1117	7.27328	6.60705	6.44198	7.28047	7.32501	7.03068	6.76966	7.42743	7.48328	7.57733	7.28164
P36916	5	Gnl1	0.000816338	6.41068	6.02283	6.67176	6.74601	6.84936	6.82932	6.74131	6.67496	6.93579	6.97515	6.95261	6.9406	6.99582	7.06204	6.98537	7.12723	7.33729	7.07651	7.10343	7.19424
P36993	4	Ppm1b	0.000120263	5.83898	6.16605	6.17814	6.03385	6.16307	6.09863	5.9145	5.8585	6.07111	6.28143	6.22655	6.30382	6.16223	6.01458	6.00032	5.44969	5.68506	5.79778	5.387	5.42548
P37040	4	Por	0.00132858	7.40969	7.6436	7.69553	7.76084	8.19312	8.02349	8.38483	8.41616	8.00409	7.92818	7.89411	7.27105	7.72724	7.80443	7.61432	7.62174	7.50336	7.24982	7.28319	7.20202
P38647	7	Hspa9	0.000366758	7.192	7.1405	7.48832	7.78584	7.39539	6.87269	6.65036	6.4493	6.24834	6.58482	7.00401	7.14268	6.91828	6.62723	7.22827	7.31606	6.91848	6.9928	7.18804	7.28316
P39053	5	Dnm1	1.68143e-08	6.36163	5.99514	7.88575	7.49925	7.69186	8.8517	8.98015	9.68538	8.96432	9.05074	10.276	10.1874	10.2786	10.4925	10.5017	11.1019	11.1494	10.9481	11.2622	11.135
P39447	5	Tjp1	0.000482592	7.73532	7.86729	7.83115	7.76338	7.98366	7.9013	7.96421	8.25054	8.20156	8.15406	8.10252	8.46362	8.83749	8.39699	8.38433	7.76195	8.06443	7.89432	8.03071	8.03856
P39688	4	Fyn	3.55742e-05	6.93168	7.18165	6.70276	6.70263	6.66556	7.0656	6.88166	6.70666	6.76093	6.81596	6.75287	6.03404	6.14451	6.4254	6.16065	6.20265	5.74307	6.17945	5.7255	5.90291
P40124	6	Cap1	1.15265e-07	9.53394	9.4776	9.86039	9.71177	9.34456	9.89746	9.90991	9.91232	10.0012	9.97593	10.34	10.1681	10.4401	10.4743	10.6281	10.6411	10.5582	10.461	10.7424	10.6053
P40142	4	Tkt	1.34099e-08	10.5647	10.6084	10.4595	10.3207	10.4844	10.3912	10.4273	10.1382	10.5711	10.537	9.87105	9.58378	9.66217	9.77156	9.50132	9.37179	9.58814	9.38492	9.25215	9.322
P40336	1	Vps26a	0.00425719	5.89249	5.937	5.92688	5.87721	5.09007	6.14837	6.96958	7.43335	6.74015	6.34989	6.48806	6.03217	6.95652	7.24686	7.13215	7.01626	6.58962	6.41016	7.48426	7.2948
P41105	3	Rpl28	2.04834e-05	10.345	9.68038	9.43763	9.59459	9.82657	8.61581	8.57068	8.65472	8.69139	8.45879	7.629	7.59936	8.62868	8.68253	8.47568	8.14315	8.21623	8.13489	8.72863	8.53532
P41216	1	Acsl1	0.231574	2.96183	3.38218	2.43591	2.12293	2.47163	2.97776	2.45103	3.74553	3.27466	3.29203	2.46829	2.44281	3.86555	3.58553	3.90329	3.21374	3.24053	2.80077	3.99005	3.94743
P41241	4	Csk	1.21066e-07	6.50368	6.38446	5.82366	5.65613	5.84518	5.97476	6.07622	5.66166	5.52692	5.3399	4.93087	4.19823	4.25635	4.21715	3.85317	4.19365	3.57008	3.50096	3.82519	3.90644
P41242	4	Matk	2.1632e-07	6.53474	7.04198	7.23377	6.53822	6.92396	7.50015	7.38478	7.19573	7.66179	7.79242	6.82918	6.92152	6.69056	6.79322	6.74184	6.08092	6.06247	5.99188	5.88485	6.04398
P42208	6	Septin2	0.0456966	6.92485	6.4589	6.93557	6.72067	6.66127	6.69203	6.52029	5.96476	6.30225	6.41155	6.7063	6.38072	6.59313	6.31621	6.83773	7.16795	6.50172	6.68648	6.8769	6.89491
P42669	5	Pura	4.10795e-07	5.42667	5.13288	6.41169	5.86835	6.08312	6.68233	6.54814	6.57737	6.28571	6.59254	7.26489	7.08741	7.65297	7.10015	7.83917	8.08675	7.75549	7.89553	8.53549	8.47589
P42859	5	Htt	9.64397e-10	5.43098	5.3689	5.24929	5.48552	5.52345	6.01624	5.86436	6.2017	6.24858	6.36546	6.68649	6.93854	6.83136	6.90456	6.93012	6.63932	6.78791	6.74258	6.82919	6.80802
P42932	4	Cct8	2.16926e-09	11.4369	11.3124	11.3363	11.3765	11.3186	11.2157	11.2052	11.0838	11.1983	11.2398	11.0004	10.7971	11.026	10.961	10.8462	10.669	10.6575	10.6054	10.6259	10.6871
P43006	5	Slc1a2	3.88254e-08	4.80842	6.0476	7.56301	6.81233	6.88272	9.19046	9.46763	10.3108	9.54592	9.33803	10.407	10.3719	10.689	10.8989	11.0828	10.8823	10.8843	10.8005	11.2034	11.0261
P43274	3	H1-4	1.79516e-08	11.549	10.8249	10.3899	10.9273	10.5173	9.12325	9.48235	9.37886	9.17812	8.81473	7.98733	8.3038	8.44568	8.50815	8.29434	7.79195	7.73032	7.69451	8.0643	8.63649
P43275	3	H1-1	2.89174e-09	10.715	9.91933	10.0603	10.3353	9.95949	8.13105	8.56922	8.71612	8.66838	8.39812	8.25721	8.29173	8.30565	8.54036	8.52495	7.98777	7.89833	7.73937	7.9574	7.75456
P43276	3	H1-5	1.30599e-07	11.32	10.4329	10.6718	10.8948	10.4489	8.98234	9.48782	9.62497	9.6177	9.23653	8.91872	8.94545	9.47475	9.5665	9.40736	8.86478	8.50858	8.4281	8.32997	8.45914
P43277	3	H1-3	1.75348e-07	10.1395	9.45531	9.08176	9.74676	9.5043	7.84081	8.08788	8.43576	8.60356	7.83997	7.30646	8.05862	7.7516	7.74821	7.49041	7.36989	7.46804	7.3073	7.44712	7.76202
P45376	6	Akr1b1	0.00953791	7.33966	7.38333	7.88645	7.95203	7.61327	7.63702	7.32015	7.00663	7.08282	7.43267	7.70675	7.47882	7.36937	7.15052	7.57171	7.89351	7.64492	7.86352	7.94035	7.94117
P45591	7	Cfl2	2.43132e-06	7.39187	7.04777	7.4281	7.69057	7.74645	6.48802	6.13588	5.86813	6.18839	6.49291	6.49806	6.68067	6.31696	6.1953	6.3388	6.57015	6.28125	6.47773	6.16159	6.51132
P46096	5	Syt1	7.55271e-07	6.08405	7.32327	7.47753	7.16716	6.58194	8.57626	9.11638	10.0094	9.29393	8.75135	9.41308	8.58791	10.0055	10.3117	10.3393	10.5702	10.5579	10.0701	11.1831	10.6764
P46460	5	Nsf	6.56828e-09	8.2616	8.22884	9.1031	8.69209	8.82406	9.91475	10.334	10.9021	10.1715	10.245	10.8499	10.7927	11.2988	11.3173	11.5185	11.7972	11.6731	11.3927	12.0015	11.8729
P46471	4	Psmc2	2.98315e-05	8.31163	8.2399	8.55932	8.61839	8.40784	8.35131	8.28816	8.27924	8.45217	8.36455	8.33161	8.36657	8.49981	8.23863	8.44582	7.94902	7.99859	7.96505	8.0309	7.99155
P46638	3	Rab11b	1.73938e-06	8.98124	9.11758	9.05221	9.24582	8.995	8.52604	8.33534	7.89176	8.27036	8.34003	8.24959	7.82795	7.96851	7.90555	8.19768	8.26072	7.95411	8.26031	8.38488	8.41571
P46660	6	Ina	1.38222e-07	9.895	9.74336	10.1821	10.0468	10.33	9.95204	9.57941	9.89128	10.3116	10.6716	10.8588	11.8514	11.8058	11.1043	11.5707	11.9366	12.1634	12.4835	12.2534	12.2137
P46664	4	Adss2	0.000422529	7.87405	7.21511	7.69463	7.68823	7.62499	7.9563	7.84408	7.40508	7.68656	7.86506	7.60482	7.44161	7.15925	7.37911	7.41163	6.80105	7.31905	6.71534	6.95968	7.13662
P46735	4	Myo1b	0.0144032	6.32099	5.90424	5.85113	5.88338	5.24409	5.83575	6.05163	5.82825	5.91512	5.63269	5.39744	4.85175	5.80576	5.92852	5.24283	4.77198	5.35933	5.22742	5.27956	5.28428
P46935	4	Nedd4	2.64828e-10	9.69804	9.50113	9.18138	9.19435	9.3133	8.79755	9.10307	8.77616	8.88498	8.79947	7.94945	7.80473	7.90644	7.74552	7.56517	7.10555	7.26469	7.15333	6.79784	6.99568
P46978	3	Stt3a	0.00265472	5.85698	5.71754	5.7583	5.6366	5.31841	5.24569	5.21929	5.43242	5.49044	5.28088	5.54812	5.11224	5.66598	5.80932	5.46817	4.79008	5.00769	5.07286	5.31564	5.17696
P47708	5	Rph3a	1.56237e-07	5.31652	5.96694	7.94949	7.32429	7.66884	9.18311	9.24764	9.94668	9.32672	9.48589	10.5028	10.7174	10.253	10.7216	10.7116	10.8258	11.1858	10.9831	11.1138	11.072
P47738	7	Aldh2	4.84015e-05	8.0206	8.06091	8.42829	8.48001	8.39232	7.64823	7.68244	7.47727	7.15073	7.59341	7.64896	7.52376	7.3988	7.30695	7.79627	8.29057	7.94129	7.95643	8.1475	8.49516
P47740	6	Aldh3a2	0.000410655	4.84194	4.83384	4.93785	4.83342	5.06469	4.94006	5.08295	5.32456	5.07416	4.81091	5.58585	4.52524	5.45053	5.6683	5.6821	5.97042	5.92844	5.59671	5.9387	5.85986
P47743	1	Grm8	0.07679	5.18639	5.2502	5.4483	5.21364	5.4048	5.41868	5.5618	5.75333	5.70713	5.73071	5.76544	5.26688	5.45278	5.88217	5.73822	5.5257	5.5682	5.19238	5.91658	5.8117
P47746	5	Cnr1	2.17026e-05	3.72596	3.58923	3.89931	2.96529	4.15234	3.91395	3.77859	4.0251	4.49405	4.38922	4.50507	5.20165	4.81254	4.95726	4.86866	4.69139	4.97505	5.12259	5.09244	5.1102
P47753	3	Capza1	1.07148e-05	7.81338	7.60811	7.77738	7.8742	7.50103	7.50074	7.39658	7.03013	7.25506	7.45334	7.2698	6.61405	7.04629	6.84412	7.05126	7.0394	6.76932	6.72258	6.73619	6.8393
P47757	1	Capzb	0.00151254	7.1451	7.08932	7.60178	7.27671	7.02653	7.81672	7.88245	8.03522	7.9308	7.76122	7.82374	7.68497	7.91798	7.87004	8.14784	7.97163	7.4349	7.29468	8.11446	7.91213
P47802	6	Mtx1	0.000854928	3.78925	3.33876	4.4881	4.07391	4.48594	4.17925	4.08855	3.70444	3.79864	3.92054	4.26729	4.28493	4.14423	3.81151	4.73031	5.24503	4.42691	5.10308	5.19309	5.37465
P47809	5	Map2k4	4.26466e-07	6.91889	6.68105	7.15604	6.81456	7.191	7.46615	7.74977	7.96673	7.79293	7.96374	7.869	8.11008	8.06226	7.95033	8.20278	7.86406	8.02931	7.76263	8.03399	7.9933
P47857	5	Pfkm	3.67418e-07	7.27078	7.04253	7.77468	7.3227	6.88702	8.05075	8.06795	8.28368	8.04146	8.04974	8.44229	8.04764	9.102	8.7047	9.0401	9.4475	9.1379	9.02108	9.57412	9.46399
P47911	3	Rpl6	1.93788e-07	8.39962	8.3237	8.00288	8.40262	8.47056	6.9598	6.99157	7.08449	7.20599	7.30291	6.87786	7.03523	7.38753	7.41803	7.06334	6.52706	7.09316	7.16009	6.99119	6.96205
P47915	3	Rpl29	4.38812e-06	10.1706	9.78297	9.22558	9.83381	10.2238	8.75075	8.01347	7.49896	8.18307	8.47958	7.92362	8.1149	8.43377	8.44036	8.28413	7.92731	8.13901	8.49314	8.32179	8.40699
P47941	4	Crkl	0.114384	6.50142	6.32829	5.83784	6.06218	6.42004	5.96675	6.48636	6.46822	6.24844	6.03288	5.76175	5.79147	6.05431	5.96252	5.84777	6.11309	6.43664	5.64807	6.15719	6.12766
P47962	3	Rpl5	5.63438e-09	9.02855	8.71995	8.71401	8.99747	8.8588	8.07524	8.14413	8.02542	8.21226	8.07755	7.51529	7.43018	7.88024	7.84944	7.85353	7.49622	7.56737	7.46666	7.62032	7.58242
P47963	3	Rpl13	1.43226e-06	10.3124	9.9767	10.023	10.0675	10.2901	8.49818	8.71809	8.07637	8.4547	8.8206	7.17882	8.15362	8.44544	8.45907	8.22848	7.81388	8.78788	8.58092	8.28588	8.29666
P48453	2	Ppp3cb	4.88449e-07	7.96497	8.05463	8.40185	8.09721	8.4069	8.69349	8.63157	8.65102	8.56258	8.83878	8.99476	9.05467	8.92431	8.99029	9.08175	8.63294	8.66418	8.59581	8.56656	8.5956
P48678	7	Lmna	0.0600208	5.41089	5.5998	5.09927	7.98901	5.41961	4.99573	4.78567	4.6397	4.60288	4.84852	4.22358	5.09597	5.0841	4.6336	5.21079	5.56677	4.93898	5.16955	5.3786	6.06906
P48722	5	Hspa4l	1.3033e-07	7.92029	8.47165	8.75848	7.92671	8.21643	9.01692	8.81884	9.22942	9.20455	9.35098	9.51834	9.82854	10.0417	9.96816	10.0268	9.83424	10.0103	9.91662	10.3649	10.2853
P48758	7	Cbr1	0.0109358	7.07004	6.5221	7.24676	7.30075	7.15618	6.79667	6.69335	6.67139	6.39717	6.523	6.65063	6.59432	6.73267	6.61438	6.9368	7.15761	6.86671	6.76622	7.07094	7.12874
P48771	6	Cox7a2	1.95079e-06	6.49797	6.67906	6.62446	6.66401	6.33142	6.18972	6.54584	6.71361	6.60223	6.46682	6.71147	6.87943	7.56017	7.42623	7.39991	7.63152	7.55909	7.95252	8.066	7.90597
P48962	5	Slc25a4	1.06005e-05	8.11142	7.89645	8.31089	8.1367	7.587	8.51182	8.69736	9.09119	8.78355	8.54352	8.74336	8.60004	9.5755	9.69711	9.7264	9.75061	9.51579	9.86468	10.5508	10.116
P49025	5	Cit	5.27022e-09	6.09615	5.6382	6.26752	6.38836	6.05932	7.10369	6.9709	7.38119	7.19262	7.25268	7.7048	7.96322	8.25118	7.98401	7.99145	7.75701	7.99201	7.7212	8.05905	8.02241
P49070	3	Camlg	0.0726263	5.3951	5.47701	5.00778	4.72738	4.41866	4.79693	4.16855	4.2219	5.0833	4.51458	4.00709	4.61445	4.70348	4.76565	4.5428	3.75293	4.23207	4.56435	4.63055	4.42392
P49312	3	Hnrnpa1	7.28844e-07	9.0591	8.55165	8.50759	8.71156	8.06712	7.51763	7.93088	7.62972	7.70102	7.36713	6.70667	6.29801	6.98432	7.02687	7.24649	6.19716	5.73542	5.94996	6.8959	6.65303
P49442	1	Inpp1	0.033644	4.96107	4.78425	5.05177	5.01385	4.75773	5.20061	5.49552	5.55071	5.37598	5.21486	5.1147	4.71257	5.36368	5.32077	5.58538	5.66372	5.27675	4.88507	5.68182	5.69321
P49615	1	Cdk5	0.0926126	5.75481	5.4536	5.73639	5.31842	5.4283	5.85939	5.87889	5.87367	5.87544	5.72232	5.68955	5.03424	5.99381	5.79878	6.12053	6.19819	6.03258	5.71272	5.88956	6.02582
P49722	3	Psma2	9.29528e-07	6.98349	6.98522	6.84182	6.919	6.70116	6.30027	5.95553	5.5297	5.8095	6.01786	5.83191	5.75324	5.71669	5.20202	5.80898	5.48127	5.21698	5.35984	5.75849	5.72939
P49817	6	Cav1	5.92813e-06	6.33301	6.39521	6.46433	6.52901	6.75796	6.20291	5.94279	5.91915	6.1759	5.98668	6.37828	6.21893	6.35862	6.83331	6.61411	6.85066	7.04323	6.93461	7.09694	6.96119
P50516	5	Atp6v1a	9.47828e-08	8.55499	8.51992	9.09592	8.81588	8.61825	9.47677	9.86268	10.1341	9.67679	9.61052	10.1637	9.7687	10.4212	10.5081	10.6802	10.9362	10.6764	10.4879	11.1181	10.9099
P50518	6	Atp6v1e1	2.3933e-07	7.68831	7.48854	8.10919	7.99757	7.7043	8.04731	7.86215	8.22707	8.16081	8.20103	8.38769	8.69524	8.90693	8.79415	9.14812	9.30808	9.29735	9.07468	9.66776	9.67339
P50580	3	Pa2g4	9.47947e-06	7.85343	6.98239	7.64012	8.16667	7.78261	7.04581	7.27094	6.7274	6.39412	6.68837	6.50722	5.75842	6.34168	6.10138	6.48121	6.46663	5.52978	5.77632	5.74654	5.8537
P51150	6	Rab7a	0.0103594	6.92533	6.83835	7.11421	6.92663	6.92837	6.84705	6.95392	7.06866	7.17926	7.14359	7.03165	7.29481	7.0042	7.17219	7.10411	7.17353	7.17238	7.18449	7.35672	7.21275
P51410	3	Rpl9	3.53729e-06	5.27001	5.49827	5.35104	5.74318	5.22818	4.56667	4.57922	4.50588	4.86263	4.60586	4.76255	3.97393	4.44636	4.55998	4.44909	4.27052	4.17103	4.60199	4.18422	4.11861
P51660	3	Hsd17b4	0.000598754	6.17822	5.81314	6.2956	6.53517	5.96457	6.09542	5.87513	5.62304	5.62444	5.85284	5.98345	5.50925	5.72944	5.74241	5.96776	5.47256	5.07371	5.23576	5.38822	5.6024
P51830	5	Adcy9	1.88647e-08	5.67873	5.83095	6.43459	6.18626	6.74879	7.19431	7.05297	7.40501	7.35407	7.49657	7.79017	8.36448	8.07232	8.10827	8.14473	8.22956	8.52017	8.3603	8.53271	8.31202
P51863	5	Atp6v0d1	8.74384e-09	7.21166	7.07678	7.91288	7.57261	7.48677	8.351	8.5512	8.93656	8.70172	8.59442	9.19653	8.9723	9.21962	9.46163	9.52954	10.0309	9.73771	9.46975	9.97146	9.80498
P51880	3	Fabp7	2.99781e-08	9.81404	9.85418	9.17646	8.84849	9.53465	8.15761	7.80755	7.15402	7.35571	7.78878	7.14238	7.80336	6.56066	6.44579	6.00229	4.15557	3.96009	4.61344	5.26766	5.33436
P51881	6	Slc25a5	3.87799e-08	6.29638	6.46575	6.65083	6.69324	6.35671	6.95336	6.90194	6.76614	6.88661	6.98412	7.6119	6.92755	7.75598	7.71648	7.98345	8.45704	8.28453	8.33853	8.88634	8.65035
P52480	6	Pkm	8.74384e-09	10.1359	9.87342	10.5577	10.5921	10.314	10.4037	10.3695	10.35	10.1712	10.529	11.0006	10.8991	11.1503	10.9657	11.4217	12.225	11.9327	11.9566	12.2777	12.2124
P52734	4	Fgd1	5.02121e-08	6.04688	5.97963	6.16212	5.86784	5.36337	6.02477	6.12401	6.05071	6.52195	6.17924	5.59941	5.55134	5.51584	5.70995	5.44094	4.44131	4.78281	4.43668	4.25707	4.55847
P52795	3	Efnb1	0.012374	4.5673	4.14105	4.29268	4.87223	4.56902	4.21948	3.74313	3.51721	4.34216	4.43985	3.72292	4.43872	3.6507	3.97231	3.53505	3.43442	3.93042	3.81439	3.54974	3.89137
P53810	1	Pitpna	7.20749e-05	7.41082	7.12365	7.77455	7.49604	7.60424	7.92579	8.22064	8.38593	8.06965	8.00468	8.25345	7.68382	8.05139	8.03647	8.2134	8.4425	8.27427	8.13185	8.46557	8.35567
P53811	4	Pitpnb	5.90987e-07	5.49823	5.53704	5.48399	5.32292	5.74029	5.27466	5.19457	4.84325	5.19136	5.08992	4.6453	4.36844	4.92671	4.61071	4.91032	4.39412	4.55571	4.51491	4.29657	4.19829
P53986	1	Slc16a1	0.016365	6.79498	6.76005	6.79654	6.47638	5.8931	6.87111	7.83993	8.97006	7.95415	7.16143	7.14366	6.75958	8.16551	8.24142	8.23996	6.84248	6.89731	6.83823	7.46838	7.11283
P53994	7	Rab2a	0.000116515	6.34327	6.51468	6.68197	7.10179	7.0836	6.07009	5.63896	5.50394	6.06342	6.03356	5.91222	5.80811	5.71512	5.76936	6.01491	6.02905	6.06969	6.46787	6.05301	6.10521
P53996	3	Cnbp	5.38186e-06	7.48146	7.72028	7.11628	7.3966	8.07442	6.8219	6.41967	6.20088	6.90191	7.13632	6.11387	6.68375	6.7148	6.50611	5.99967	5.79636	6.10386	5.66129	5.70561	5.64592
P54227	3	Stmn1	3.26973e-07	11.1476	11.0551	10.5409	10.7377	10.9721	9.14041	8.59445	8.23154	9.94418	10.0005	8.10954	9.02497	7.61198	7.97693	7.51628	7.31529	7.47741	7.43529	6.42725	7.0524
P54285	5	Cacnb3	2.04896e-07	4.81863	5.29478	4.93147	4.66655	4.9086	5.51432	5.25287	5.37234	5.49197	5.64327	5.7538	5.55705	5.7335	5.82447	5.68463	5.95164	6.11456	5.96948	6.20311	5.98706
P54754	5	Ephb3	1.59962e-06	3.47089	2.82468	4.21572	3.15757	4.14899	5.19998	5.69486	6.29285	5.62744	5.44068	5.64999	5.13769	5.93952	6.08038	6.18467	5.93331	6.01516	5.49656	5.80215	5.94977
P54823	3	Ddx6	1.75733e-07	5.691	5.32055	5.43161	5.55536	5.7719	4.88659	5.00249	4.80644	4.87352	4.97875	4.72961	4.3645	4.51976	4.45457	4.92616	4.54734	4.30296	4.43024	4.53168	4.33773
P54830	5	Ptpn5	2.5347e-07	6.34595	6.88014	7.27673	6.75481	6.7782	7.74677	7.52606	7.55265	7.67728	7.69355	8.09931	7.86097	8.47216	7.83111	8.48698	8.79823	8.30986	8.46627	8.74345	8.84932
P55012	5	Slc12a2	7.56427e-09	7.60785	7.73773	7.97378	7.59673	7.58049	8.46748	8.42137	8.67068	8.87818	8.83478	8.96171	9.05229	9.27611	8.96946	9.13864	8.86987	8.96592	8.95701	9.05819	9.06725
P55096	8	Abcd3	0.0147599	6.47674	6.23386	6.58709	6.32145	5.98979	6.23659	7.12229	7.35518	6.91477	6.26246	5.96091	5.35152	6.55238	6.79868	6.40904	6.00059	5.65544	5.32329	6.03425	5.68818
P55821	3	Stmn2	0.181091	11.2965	11.2805	10.5748	10.7488	10.9533	9.46915	8.93329	8.4111	9.98697	10.0542	8.13675	9.08899	7.55461	7.94115	7.48747	7.2236	7.49503	7.44099	6.40611	7.06132
P56380	8	Nudt2	0.943196	5.52504	4.66941	4.97777	4.9242	3.99988	4.99129	5.87959	5.87919	5.25264	4.60409	4.38466	3.64758	4.76904	4.98116	4.96802	5.03844	4.77716	4.1057	5.16421	4.89991
P56382	6	Atp5f1e	0.183421	5.65184	5.19155	5.51718	5.98458	5.85933	5.32465	5.22014	5.28637	5.33201	5.8587	5.84521	6.13834	6.29328	6.41665	5.98737	6.64542	6.67526	6.77486	6.95592	7.02491
P56391	6	Cox6b1	1.64419e-06	4.3177	3.95295	4.32885	5.13555	4.0522	4.26168	3.99927	3.85246	3.90424	4.08055	4.63131	4.70841	5.23362	4.92443	5.08485	5.49369	5.0902	5.24543	5.12424	5.56461
P56395	7	Cyb5a	3.65503e-05	7.21677	7.64609	7.62672	7.62914	7.75641	7.15778	7.01327	7.16762	7.20096	7.19996	7.3319	7.37407	7.48176	7.41169	7.53361	7.27546	7.50221	7.5293	7.51982	7.42506
P56399	5	Usp5	0.00101235	9.48582	9.92659	9.89687	9.79912	9.69545	10.1516	10.1112	10.0686	10.3885	10.4044	10.2952	10.4252	10.264	10.4174	10.3238	10.2221	10.4318	10.2876	10.4143	10.379
P56480	6	Atp5f1b	1.434e-05	8.11773	7.78915	8.73014	8.86319	8.29827	8.09957	7.98452	7.65026	7.36832	7.80016	8.56693	8.35587	8.40533	8.15911	8.83217	9.48234	8.671	8.96142	9.18956	9.34444
P56564	1	Slc1a3	0.000181981	4.35398	3.96016	5.63707	4.86285	5.38137	5.86235	6.13082	6.61542	6.12761	5.5499	6.40316	6.16978	6.6331	6.46407	7.00364	6.91259	6.77982	6.56192	7.1728	6.92215
P56695	6	Wfs1	2.37703e-05	4.62498	6.16571	5.45575	5.64219	5.59701	5.90691	5.40368	5.71559	5.88742	5.82553	6.44113	6.10769	6.49827	6.48518	6.3249	6.6731	6.19977	7.05798	6.91306	6.98791
P56812	3	Pdcd5	0.000210891	7.97143	7.9176	7.49953	7.46332	7.85332	7.68239	7.61465	7.59372	7.63391	7.83012	7.60638	7.76192	7.40082	7.56689	7.32706	7.06176	7.40478	6.82906	7.16263	7.10158
P56959	3	Fus	0.000474767	9.14312	8.82792	8.6797	9.32445	8.83471	7.75576	7.90878	7.94719	8.17015	8.0268	7.32634	7.72564	8.18407	8.08572	7.8628	7.9107	8.07512	7.71251	8.00103	8.00468
P57722	3	Pcbp3	7.66056e-06	5.10181	5.00095	5.44921	5.21653	5.29888	4.71853	4.60991	4.15639	4.66889	5.10429	4.4635	4.86597	4.92029	4.2085	4.27348	4.10448	4.12052	4.28639	4.07007	4.68267
P57746	5	Atp6v1d	0.000820497	5.15075	5.15537	5.81307	5.45805	5.44914	6.58383	6.6766	6.97797	6.72005	6.59472	6.99549	6.45423	7.25579	7.37094	7.46661	7.74049	7.26145	7.33484	8.13293	7.83084
P57759	7	Erp29	1.88949e-07	4.66816	5.70255	5.43597	5.59302	5.22848	5.08182	5.06631	4.82933	4.81278	4.95797	5.00102	5.41088	6.23513	5.4755	5.34959	4.72398	4.83599	5.18032	4.74946	4.85696
P57776	3	Eef1d	0.0260863	6.50309	6.41	6.71391	6.9714	7.16209	6.18436	5.67294	5.22208	5.72901	5.92586	5.57047	6.18278	5.82655	5.18369	5.67171	4.96612	4.98972	5.27801	4.74971	5.17289
P57780	5	Actn4	6.52724e-06	10.4108	10.5059	10.499	10.4445	10.409	10.9948	10.8904	10.9864	11.0759	11.2556	11.2382	11.1938	11.2495	11.291	11.016	10.9744	11.3251	11.1265	11.2717	11.2452
P58252	3	Eef2	0.286569	11.4321	11.3799	10.9727	11.1023	10.914	10.2013	10.495	10.2258	10.2056	10.1087	9.76383	9.40385	10.0578	9.81821	9.76174	9.37003	9.45382	9.3593	9.56111	9.48758
P58281	6	Opa1	9.20997e-09	7.30002	7.51008	8.02637	7.78432	7.91936	8.01845	8.06739	8.13895	7.99141	8.00803	8.51759	8.1955	8.80959	8.65277	8.78206	9.27551	9.10617	9.03068	9.39342	9.29539
P58404	3	Strn4	1.3685e-07	7.28927	7.17598	7.18347	7.20436	7.41947	7.18345	6.99414	6.78195	7.13096	7.35981	6.83903	7.28639	6.76379	6.78369	6.89803	6.25851	6.58045	6.33863	6.16195	6.37855
P58771	8	Tpm1	7.55687e-06	5.99796	6.15396	6.63743	5.96401	5.49995	6.17564	6.58941	7.04034	6.84236	6.43593	5.90142	5.86518	6.40744	6.30059	6.47882	5.66787	6.11118	5.67996	6.22287	6.00717
P58871	7	Tnks1bp1	0.0285875	8.23323	8.22222	8.40671	8.4635	8.75678	8.48344	8.0295	8.21221	8.60953	8.81527	8.65207	9.4824	8.76722	8.75913	8.77744	8.2644	8.95062	8.60311	8.4756	8.6398
P59281	8	Arhgap39	0.321046	8.92321	8.83138	8.72731	8.71074	8.62244	9.05229	9.29647	9.49235	9.39514	9.29841	8.94927	8.91553	8.94424	9.23186	9.18075	8.69967	8.99727	8.69048	8.96057	8.88744
P59325	3	Eif5	0.000166935	7.11741	7.32323	7.32734	6.95254	7.05417	7.08328	6.87968	6.65164	6.92632	7.20506	6.81891	6.96569	6.6151	6.50867	6.4272	6.34159	6.37435	6.43007	6.13589	6.17883
P59644	5	Inpp5j	2.26856e-05	1.83465	2.29737	2.68991	4.00861	3.05515	4.2167	4.17258	4.79374	4.53175	4.53629	4.98915	4.79096	4.95975	5.04323	4.9205	5.09585	5.0337	4.40609	4.78796	4.88289
P59759	5	Mrtfb	7.88209e-06	5.69023	5.93141	5.73369	5.66899	5.89377	6.00826	6.0809	6.13851	6.20279	6.3734	6.10901	5.82212	6.12793	6.17607	6.15507	5.91071	6.26279	5.5786	5.93815	6.06695
P59764	5	Dock4	0.0203405	7.33788	7.43724	7.18253	7.32956	7.3092	7.38063	7.57574	7.79003	7.82343	7.75262	7.97882	8.21773	8.18808	8.08188	8.03939	7.53145	8.15677	7.74329	7.90943	7.85687
P59999	6	Arpc4	2.1593e-05	7.50219	7.56435	7.77868	7.72538	7.30794	7.5621	7.42852	7.32033	7.54067	7.54917	7.59675	7.2375	7.68848	7.73271	7.68432	7.74931	7.67758	7.94287	7.99178	7.98499
P60122	3	Ruvbl1	0.0131376	6.73206	6.5525	6.70896	6.6578	7.00157	6.24549	6.17431	6.07306	6.28061	6.48476	6.10976	6.36702	6.07531	5.86685	6.04208	5.80159	5.73019	5.57618	5.69422	6.13122
P60229	4	Eif3e	7.87677e-06	5.46314	5.11525	5.40571	5.38766	5.00104	5.02746	4.81788	5.07168	4.89682	4.99336	4.41621	4.35038	5.0646	4.72818	4.72282	4.50815	3.82392	4.09468	4.17924	4.05988
P60335	3	Pcbp1	8.26274e-06	7.94217	8.22385	8.17162	8.28764	8.28998	7.83606	7.59582	7.23045	7.92968	8.09494	7.59473	8.02297	7.50834	7.46238	7.46026	7.12331	7.32703	7.39749	7.13416	7.31423
P60469	5	Ppfia3	0.00015475	9.58819	9.55337	9.84172	9.67277	9.55049	10.2716	10.612	11.0054	10.77	10.5983	10.5015	10.5142	10.4928	10.7931	10.7483	10.3914	10.6617	10.3106	10.5878	10.528
P60487	6	Pdxp	9.32289e-07	3.06782	1.98	3.59649	1.9071	3.51003	2.63176	2.51496	2.24147	1.98663	2.39399	3.17128	2.55847	2.55486	2.53407	2.98729	3.34951	2.84499	3.11168	3.84887	3.2291
P60670	8	Nploc4	0.0707693	5.83035	5.82267	5.36545	5.25012	5.01865	5.64281	6.2052	6.56019	6.15171	5.6896	5.73132	5.15145	5.98723	6.10832	6.17914	5.34518	4.96411	4.53077	5.41427	5.32328
P60710	3	Actb	0.00893712	10.4468	10.3753	10.4772	10.6217	10.4887	10.4152	10.2277	9.9097	10.1334	10.4481	10.3057	10.2667	9.95404	10.0994	10.114	10.1609	9.9489	10.0951	9.86432	9.87791
P60761	5	Nrgn	0.00145193	3.91694	5.07791	6.26486	5.60214	5.50873	7.1345	6.97862	6.97188	7.43331	7.56983	7.74921	8.40708	7.50177	7.69243	7.7381	6.79496	7.1909	7.35891	6.53398	6.803
P60766	1	Cdc42	1.28624e-05	8.0904	7.87422	7.97191	7.78548	7.70172	7.97458	8.69275	9.04068	8.49964	8.18682	8.18504	7.78693	8.51373	8.61708	8.56303	8.48234	8.37578	8.00269	8.63233	8.39184
P60824	3	Cirbp	0.0396551	7.43989	7.484	6.81103	7.7634	7.8759	5.34153	5.60678	5.21836	5.8463	5.80721	4.71871	4.54194	4.81739	4.7435	4.41617	4.21516	4.60266	4.6064	4.04913	4.09477
P60840	5	Ensa	1.78981e-09	5.75486	5.61085	5.58176	5.2849	5.56949	6.04475	6.24092	7.05251	6.7934	6.39948	6.69603	7.29875	7.3539	7.34981	7.46223	7.0602	7.15254	6.99342	7.67698	7.28905
P60867	3	Rps20	0.336268	8.33524	8.26563	8.16382	8.24963	7.89286	6.89473	7.18107	7.35455	7.43076	6.89121	6.72514	6.86819	7.07456	7.25604	7.05496	6.45348	6.70885	6.76764	6.83576	6.75419
P60879	5	Snap25	9.43739e-08	7.43941	7.82059	8.30715	7.9686	8.38079	8.97759	8.68639	8.89245	9.11479	9.23691	9.60033	10.1314	9.7418	9.8041	10.1211	9.86868	10.0431	10.065	10.5205	10.3827
P60904	6	Dnajc5	3.87799e-08	7.04808	6.7588	6.3644	6.74447	6.01573	5.7863	6.41447	7.4156	7.2836	6.32153	5.87391	6.88809	7.32855	7.44026	7.50497	7.55381	7.69387	7.43296	8.3287	7.80689
P61027	1	Rab10	0.185439	7.58905	7.9292	7.82079	7.55701	7.40411	7.89027	7.77266	7.87836	8.13456	7.95043	7.84103	7.97519	8.04249	8.21294	8.09021	7.87785	7.80184	8.10721	8.24391	8.19993
P61028	6	Rab8b	0.0121151	4.28347	4.05578	3.99125	3.98052	4.91733	3.84764	3.43688	3.56944	4.03211	4.10399	3.92715	4.34614	3.88174	4.06103	4.08168	4.22073	4.74045	5.06842	4.94232	4.78438
P61161	8	Actr2	0.833467	7.63181	7.29141	7.66977	7.47433	7.30075	7.89244	8.42162	8.20785	7.65172	7.8232	7.62016	6.82304	7.43134	7.66781	7.49302	7.66756	7.17633	7.11553	7.51538	7.54025
P61164	4	Actr1a	0.0109841	7.17923	6.75097	6.9395	7.06699	7.04806	7.13879	7.35557	7.13624	7.06501	7.03996	6.71242	6.05665	6.48013	6.3388	6.55173	6.59129	6.34242	6.31128	6.284	6.41889
P61202	1	Cops2	6.10977e-06	3.45287	4.58302	5.07169	4.80362	4.7887	5.50235	5.55966	5.58564	5.11218	5.18453	5.43815	4.64365	5.32783	5.32351	5.33731	5.8313	5.75001	5.10677	5.65642	5.61786
P61222	3	Abce1	0.00548863	8.83914	8.78007	8.75774	8.88724	8.582	8.30436	8.25429	7.93432	8.32391	8.3837	7.91644	7.7453	7.97547	7.65453	7.90314	7.59539	7.66795	7.62979	7.61139	7.67275
P61226	1	Rap2b	1.08867e-08	3.77286	3.84912	4.25295	3.63924	2.31956	4.47884	4.57756	5.10029	4.62018	4.43376	4.45544	4.60365	5.37038	5.41381	5.60723	5.68998	5.53215	5.16374	6.39187	6.02255
P61264	5	Stx1b	0.000101826	8.64791	8.92195	9.02336	9.00375	8.86567	9.23373	9.39855	9.67666	9.60488	9.61913	9.94171	10.1579	10.3225	10.4623	10.4318	10.7643	10.9842	10.8166	11.3286	11.1825
P61294	4	Rab6b	2.56893e-09	7.79065	8.15135	7.9849	7.84453	8.26067	8.27793	8.07658	7.86692	8.38538	8.41123	8.26323	8.09795	7.94846	8.11592	7.89135	7.48579	7.74235	8.03571	7.75446	7.89553
P61329	1	Fgf12	0.0330695	6.70082	6.95487	7.59368	7.03607	6.85675	8.05129	8.38576	8.81954	8.46818	8.30532	7.9602	7.55189	8.59711	8.60628	8.4336	8.62137	8.60415	8.3382	8.86533	8.65958
P61358	3	Rpl27	1.10309e-05	7.50993	7.02762	6.90802	7.12398	7.25179	5.41753	5.89987	5.91626	5.85739	5.98361	5.2571	5.56031	5.96305	5.96092	5.69755	5.476	5.94037	5.54707	5.88074	5.70809
P61750	3	Arf4	2.69103e-07	8.60433	8.56702	8.44467	8.48329	8.67322	8.09426	7.90082	7.56107	7.92698	7.91932	7.59229	7.34419	7.36362	7.46497	7.21695	6.78816	6.84079	7.08211	6.79163	6.79406
P61759	3	Vbp1	1.11686e-09	6.25102	6.45663	6.15671	6.46971	6.3628	5.97397	5.80751	5.5459	5.58558	5.82599	5.66361	5.16245	5.46625	5.47374	5.48653	5.39065	5.08231	5.29479	5.08754	5.15081
P61804	3	Dad1	1.69093e-07	4.46469	5.0851	4.34025	4.42878	4.10007	3.92781	4.20786	5.05505	4.4202	3.864	3.84842	3.6863	4.00501	4.4547	4.01676	3.27929	3.78408	3.89485	4.00199	3.93555
P61922	6	Abat	0.0405578	6.75159	6.92272	7.72573	7.83251	7.80776	7.86716	7.70759	7.61849	7.26666	7.77259	8.39593	8.28905	8.21636	8.16951	8.86568	9.16089	8.69419	8.94377	9.14978	9.14605
P61957	3	Sumo2	9.01492e-06	8.65255	8.47268	8.27125	8.79179	8.69714	6.8585	6.85315	6.68541	7.20916	7.12348	6.53587	6.54282	6.52495	6.52932	6.06004	6.01646	5.92445	5.64759	5.94609	5.81011
P61963	4	Dcaf7	2.81165e-10	4.30332	4.18444	4.23049	4.82287	3.62345	4.00127	4.09988	4.01974	4.41248	4.28502	3.66758	3.6943	4.27205	3.89664	4.11157	3.63553	3.81604	3.62339	3.40989	2.87397
P61979	3	Hnrnpk	0.00945494	9.78488	9.12774	9.59397	9.98404	9.2192	8.7722	8.9297	8.43562	8.59865	8.55745	8.2426	7.23207	8.37844	8.02819	8.50267	8.40748	7.04343	7.54411	8.2305	8.1994
P62071	2	Rras2	0.758973	7.91241	7.90444	7.98509	7.70152	7.86197	8.33244	8.19196	8.24553	8.50453	8.5633	8.35236	8.18033	8.25095	8.48434	8.287	7.94587	8.16995	7.90401	7.87165	7.95689
P62082	3	Rps7	3.43189e-05	8.58381	8.35438	8.30862	8.5548	7.9236	7.63481	8.04028	7.98232	7.9902	7.49306	7.49844	6.89791	7.66671	7.84496	7.67397	7.19593	6.89309	7.11789	7.41015	7.20295
P62192	3	Psmc1	0.180958	7.35468	7.05888	7.20665	7.39152	7.04411	6.49396	6.77501	6.8622	6.60528	6.58738	6.12019	6.2946	6.82781	6.55434	6.8427	6.37428	6.39241	6.1078	6.67092	6.46529
P62196	3	Psmc5	0.000225179	8.52748	8.22254	8.9619	9.00167	8.54688	8.41145	8.12012	7.76265	7.93366	8.17843	8.12656	8.21388	8.08914	7.96668	8.24783	7.95462	7.63588	7.86058	7.83161	7.86069
P62242	3	Rps8	0.000322604	9.68034	9.53784	9.30165	9.75506	9.39614	8.3295	8.4738	8.73218	8.92817	8.51971	8.22619	8.69706	8.78508	8.7945	8.41706	8.09408	8.28172	8.29443	8.3222	8.3733
P62245	3	Rps15a	8.15097e-07	3.89229	3.69282	3.23325	4.09265	3.51341	3.20163	3.06212	2.39331	3.06699	2.80117	3.63488	2.91851	3.07955	3.38972	2.62828	1.63367	2.03425	2.62388	2.82132	2.48653
P62259	8	Ywhae	0.000657225	9.70404	9.2779	9.5939	9.43517	9.19849	9.63073	10.0132	9.91411	9.81289	9.85218	9.56226	8.77129	9.51619	9.64835	9.48037	9.70274	9.51118	9.18769	9.40502	9.35243
P62264	3	Rps14	0.0325021	7.345	7.25411	6.84417	7.65025	7.45024	5.90419	5.64639	5.97095	6.25235	5.89487	5.71093	6.13017	5.9774	6.21184	5.86268	5.3418	5.91628	6.01718	5.94601	5.8993
P62267	3	Rps23	5.12854e-07	7.61545	7.51878	7.11912	7.85927	7.51653	6.15169	6.02994	6.21687	6.64137	6.41332	6.14724	6.5171	6.58353	6.59671	6.3646	6.19052	6.02385	6.45769	6.08746	6.10117
P62270	3	Rps18	4.48345e-07	7.05564	6.65417	6.61883	6.68667	6.52596	5.5338	6.00052	6.21135	6.27603	5.56659	5.35923	5.54909	5.7238	6.06469	5.60943	5.26843	4.99918	5.17829	5.69074	5.32884
P62281	3	Rps11	8.33438e-06	8.35237	8.1849	7.62088	8.1552	7.79854	6.6052	6.84191	6.95854	7.29495	7.16621	6.52137	7.20752	7.00299	7.35385	6.90098	6.50814	6.67222	6.63054	6.88672	6.8357
P62301	3	Rps13	1.05608e-05	4.54874	4.72006	4.86723	5.01869	4.76821	3.33466	3.45297	3.60351	3.92572	3.58918	3.99147	3.80145	3.8348	4.01709	3.31639	2.87689	3.42735	4.2327	3.50637	3.38967
P62317	3	Snrpd2	4.35766e-05	5.49125	4.944	4.56316	5.31656	4.9866	3.52367	4.0921	3.49094	3.82386	3.50496	3.24421	4.54895	3.55746	3.43421	3.11621	2.49112	3.1599	4.35757	3.46668	3.41254
P62334	3	Psmc6	0.000351715	5.93053	5.6478	6.18769	6.32551	5.69397	5.62735	5.39736	5.22072	5.48743	5.32663	5.47041	5.62517	5.63109	5.22308	5.6761	5.1086	5.13113	5.13513	5.23026	5.30083
P62484	5	Abi2	0.000182922	6.91771	7.4895	7.27751	6.99966	7.29482	7.8984	7.34614	7.23357	7.86464	7.90409	7.76105	8.30519	7.71635	7.71056	7.79404	7.25563	7.7146	7.88775	8.01487	8.0286
P62500	5	Tsc22d1	0.0122368	3.6542	3.28685	3.19606	4.26554	4.28069	3.66457	4.10117	4.12728	4.68688	4.28803	4.27819	4.67826	4.0274	4.54666	4.28703	4.05708	4.62759	4.62559	4.44295	4.61643
P62631	1	Eef1a2	0.0317932	7.56892	7.51429	8.07675	8.02276	7.51662	8.30034	8.87386	9.16479	8.55252	8.45225	8.63104	7.94513	9.03885	8.99046	9.13764	9.3256	8.9678	8.72151	9.35419	9.24002
P62702	3	Rps4x	0.000207327	9.53761	9.56653	9.33236	9.61155	9.23591	8.65468	8.39941	7.96036	8.47551	8.38143	8.19642	7.72541	8.18373	8.09079	8.25834	7.63677	7.53171	7.9663	8.01285	8.01769
P62715	5	Ppp2cb	8.69081e-08	4.84173	4.80453	5.25551	5.25426	5.25535	5.439	5.09795	5.01374	5.18669	5.20549	5.58144	5.31008	4.92002	4.80789	4.96304	5.7769	5.46662	5.48911	5.08785	5.30457
P62717	3	Rpl18a	0.180332	9.18141	9.05288	8.82342	9.26704	9.17067	7.83656	7.88308	7.92025	8.03347	8.02828	7.58633	7.85259	7.99885	8.10288	7.79969	7.4392	7.76031	7.75617	7.84747	7.8221
P62743	5	Ap2s1	1.1348e-08	4.00983	4.39331	4.52895	4.19956	4.57659	4.99559	4.93566	5.05721	5.2305	4.91943	5.35102	5.05458	5.56001	5.75469	5.64694	5.88839	5.90247	5.93091	6.29313	6.23907
P62746	5	Rhob	6.92908e-08	8.23593	8.60506	8.38229	8.57782	8.38481	8.82185	8.24193	8.20607	8.72827	9.00417	9.00463	9.44472	8.69535	9.08235	8.89025	8.47046	8.69596	9.03963	8.90682	8.86674
P62751	3	Rpl23a	0.0196696	9.5105	9.47133	9.12638	10.0913	9.73389	8.19531	8.08749	8.06137	8.50864	8.30335	8.14838	8.82782	8.75327	8.6829	8.11301	7.82742	8.21922	8.11032	7.86813	8.01593
P62754	3	Rps6	1.65996e-06	10.5925	10.4239	10.2225	10.3669	10.4377	8.83666	8.77466	8.32596	8.81312	8.98761	7.96524	8.7538	8.84755	8.98965	8.60028	8.01306	8.9325	8.91419	8.62075	8.51215
P62761	1	Vsnl1	4.13422e-07	7.35496	7.21248	7.88443	7.20755	6.92643	8.43239	8.99288	9.88412	9.08093	8.77251	8.82013	8.83552	9.71696	9.67857	9.89428	9.55218	9.56841	9.04434	9.87374	9.60974
P62806	3	H4c1; H4c11; H4c12; H4c14; H4c2; H4c3; H4c4; H4c6; H4c8; H4c9; H4f16; Hist1h4m	4.42747e-06	11.4231	11.0266	11.0639	11.2976	11.0792	8.92346	9.44207	9.18014	9.1642	9.12877	8.44201	8.48372	8.9158	9.06931	8.63486	8.81168	9.32813	9.16678	9.13877	8.8915
P62812	5	Gabra1	8.50287e-10	4.76678	4.92205	5.35696	5.04026	4.94542	5.87436	5.83229	5.97204	6.02927	6.15811	6.26695	6.2942	7.02131	6.90913	6.82666	6.87295	6.82302	7.18074	7.35265	7.30569
P62814	5	Atp6v1b2	2.49596e-08	8.43174	8.62737	9.1599	9.1295	9.0396	9.65602	9.45534	9.54837	9.52842	9.89177	10.4836	10.5917	10.2977	10.369	10.4475	10.8097	10.7347	10.793	10.9285	10.9182
P62821	6	Rab1A	3.98868e-09	8.0046	7.82718	8.20544	8.14759	8.03847	8.15604	8.09753	7.98939	8.231	8.24862	8.25146	8.18435	8.10283	8.20632	8.32485	8.25315	8.3615	8.38731	8.49955	8.53341
P62823	5	Rab3c	0.00142859	7.14976	7.07669	7.67624	7.44352	7.23296	8.25745	8.49573	9.12132	8.50207	8.31599	9.01967	8.98055	9.25973	9.40662	9.5242	9.67578	9.66202	9.44889	9.95917	9.77731
P62830	3	Rpl23	0.183489	8.44734	8.89717	8.37249	8.85758	9.04796	7.61358	7.07347	6.88196	7.59113	7.63228	7.23642	7.89178	7.31233	7.54139	7.05944	6.58572	6.89629	7.39375	6.9348	6.94606
P62838	7	Ube2d2	2.54079e-06	4.47348	4.83706	4.44474	4.83154	4.63441	3.61709	3.57841	4.75611	4.37404	3.61515	3.74674	4.50667	4.45026	4.61405	4.29176	4.33895	4.28275	4.12308	4.59543	4.85978
P62855	3	Rps26	0.443355	7.06421	6.93098	6.68539	7.43106	6.58492	6.02981	6.14902	6.18578	6.2323	5.81158	5.35228	5.29875	6.13027	6.37884	5.68978	5.32943	5.67911	5.49252	5.94018	5.60011
P62858	3	Rps28	6.28866e-05	5.11309	5.58216	4.52925	5.90453	5.65598	4.34116	3.8131	3.54688	4.55879	4.60003	4.01306	4.80868	4.23655	4.80014	3.93669	2.84538	3.91234	3.52369	2.8036	3.69187
P62869	3	Elob	0.000151831	6.97115	6.84401	6.74662	7.3064	7.21312	5.94895	6.17996	6.26141	6.19758	5.97355	5.93805	6.06529	6.12521	5.96875	5.91138	5.82292	6.10436	5.63548	5.91855	5.9616
P62874	6	Gnb1	1.95921e-07	7.82818	7.45437	7.81914	8.07313	7.53778	7.60774	7.53342	7.2861	7.30185	7.3896	7.50625	7.72484	7.60376	7.33458	8.11945	8.24422	7.58781	7.78617	8.53484	8.33811
P62880	6	Gnb2	0.0174081	5.60156	5.46981	5.91685	6.17958	6.20464	6.07254	6.04289	6.07547	5.69221	5.75373	6.54468	5.72421	6.21028	5.75452	6.529	6.84485	6.4805	6.41842	7.05606	6.95093
P62881	5	Gnb5	0.00204544	5.56771	5.6105	6.286	6.18676	6.21329	6.8602	6.70392	6.77978	6.70984	6.76053	7.0045	6.86592	7.10647	7.06038	7.40925	7.69398	7.24879	7.51291	7.83025	7.69399
P62889	3	Rpl30	3.26973e-07	7.41712	7.78574	7.34756	7.81499	7.83577	6.66468	6.37483	6.05155	6.55464	6.52728	6.35995	6.71026	6.32497	6.52903	6.04202	5.54523	5.91725	6.13296	6.04925	6.00627
P62897	6	Cycs	1.79417e-07	8.54806	7.47296	7.80529	8.64313	8.04758	8.45749	8.40195	8.15428	7.89993	8.02078	9.00803	8.14552	8.86871	9.26425	8.97945	9.12737	8.67595	8.41216	9.32052	9.19918
P62900	3	Rpl31	0.0071658	8.75903	8.77637	8.54642	8.8224	8.86377	7.19636	7.13027	6.80908	7.5549	7.59887	6.84918	7.32984	7.28931	7.39364	7.05947	6.69642	7.1622	7.2173	7.04298	6.80085
P62908	3	Rps3	4.84215e-08	9.27473	9.14712	8.88879	8.93872	8.70609	8.54935	8.56803	8.56274	8.67825	8.25669	8.02624	7.37814	8.27414	8.28712	8.2174	7.68569	7.45869	7.66245	8.01282	7.82464
P62911	3	Rpl32	1.02222e-05	9.36117	9.19122	8.61556	9.06569	9.50419	8.0363	7.53642	7.0751	7.76366	7.77518	7.49492	7.53222	8.0185	8.01892	7.76917	7.33554	7.7042	8.14854	7.94273	7.87846
P62965	3	Crabp1	0.58413	8.05118	7.8545	7.03055	7.87979	7.88286	6.50214	6.3923	5.85923	6.22962	6.3388	5.4289	5.57621	4.99598	4.85924	4.46778	4.229	4.35448	4.74697	4.03312	4.1152
P62983	3	Rps27a	5.49134e-09	10.7706	10.8583	10.6557	10.8098	10.5003	9.90457	10.1998	9.94891	10.1908	10.18	9.74053	9.4055	9.64996	9.50908	9.37823	9.52718	9.31189	9.26296	9.37738	9.83607
P62996	3	Tra2b	6.1447e-08	4.70241	5.42177	5.32746	5.6431	5.75821	4.17614	3.43751	3.32486	3.9093	3.97417	3.31913	4.20778	3.43596	3.60519	3.01596	2.98555	2.67564	3.42366	3.02448	3.65166
P63001	6	Rac1	2.54079e-06	6.60974	6.95317	6.72499	6.67023	6.6398	6.60878	6.54544	6.49165	6.86365	6.94127	7.03316	7.46416	7.17404	7.22673	7.2721	7.23366	7.38095	7.49409	7.63426	7.56259
P63005	8	Pafah1b1	4.39361e-06	7.86297	7.14955	7.70699	7.74606	7.61348	7.83391	8.10698	8.04045	7.85068	8.02212	7.81583	7.12879	7.61975	7.69406	7.72586	7.87645	7.8121	7.49395	7.71839	7.73213
P63011	5	Rab3a	0.0589126	7.85004	7.86779	8.44017	8.13113	8.2427	9.29255	9.62251	10.11	9.55213	9.70991	10.2941	10.124	10.3456	10.6731	10.5769	10.7353	10.7709	10.7294	11.1862	11.0555
P63017	5	Hspa8	1.35571e-09	10.5473	10.3902	10.8492	10.6065	10.4181	10.8012	10.9103	11.0348	10.9149	10.9127	11.0984	10.9422	11.0785	11.1663	11.1848	11.1955	11.0745	10.885	11.1412	11.0433
P63028	3	Tpt1	3.42802e-05	8.10177	7.93886	7.89274	7.7153	7.89783	7.83981	7.53738	7.21336	7.89361	7.92223	7.51697	7.38919	7.41957	7.47353	7.3334	7.34669	7.28561	7.36921	7.13729	7.09093
P63037	3	Dnaja1	0.000265671	7.48701	7.3514	7.42026	7.58437	7.12407	7.23514	7.39939	7.36327	7.2098	7.4885	7.14259	6.97004	7.23804	7.13611	7.20091	7.15263	7.12632	6.76049	7.28839	7.18306
P63038	6	Hspd1	0.0225332	8.31273	8.12995	8.9065	8.94896	8.49396	8.2859	8.27619	8.14657	7.65388	8.0323	8.60258	8.37805	8.44378	8.2097	8.71585	9.49103	8.65279	8.72641	9.10315	9.05888
P63044	6	Vamp2	0.00204611	6.75728	7.35526	7.40524	7.14945	7.23026	7.31463	7.36112	7.37125	7.45969	7.64708	7.82533	8.15728	8.07472	8.20365	8.02729	8.10712	8.27714	8.54293	8.84019	8.70534
P63046	5	Sult4a1	7.60219e-07	1.63571	2.74291	2.85666	3.47458	1.64021	3.41271	3.13123	2.87812	3.00702	3.13272	3.45338	3.3885	3.60227	3.45639	3.46508	3.20732	3.37385	3.66228	3.77661	3.58619
P63085	5	Mapk1	0.00662897	7.6629	7.84036	8.18076	7.8501	7.79668	8.39615	8.29689	8.24275	8.45052	8.50485	8.76571	8.90721	8.88137	8.70436	8.91848	8.81057	8.58473	8.74753	8.95215	8.97364
P63089	3	Ptn	1.21821e-07	7.61346	7.13512	6.61842	7.69666	7.55692	6.22195	6.32258	6.15342	6.52333	6.31812	5.38061	5.61349	5.69555	5.80502	5.46753	5.04292	5.16339	5.04089	5.03216	4.76058
P63101	1	Ywhaz	1.55043e-08	9.88438	9.81686	10.1919	10.1251	9.78465	10.1672	10.3512	10.2471	10.1818	10.2939	10.3236	10.2555	10.3346	10.3891	10.5639	10.713	10.2828	10.3913	10.6896	10.6054
P63137	6	Gabrb2	0.000234096	2.32697	3.71862	4.14049	4.28559	4.04087	4.17228	3.84818	3.84323	4.32876	4.25741	4.83223	5.05858	5.47661	5.39942	5.47157	5.5929	5.80779	6.57873	6.13528	5.89235
P63168	8	Dynll1	7.8602e-06	6.59087	6.04894	6.26327	6.10705	5.34998	6.37507	7.08265	7.2746	7.04073	6.33695	6.22114	5.81538	6.8032	7.11222	7.05365	6.23032	5.90477	5.77601	6.76253	6.16233
P63213	7	Gng2	0.0725749	7.59984	7.38933	7.65124	8.03331	7.59536	6.97192	6.78158	6.50271	6.99355	6.79372	6.8559	6.67521	6.7871	6.82984	6.77357	6.91693	6.76324	7.07777	7.24165	7.01325
P63216	6	Gng3	6.47163e-06	4.56164	5.18238	5.46141	5.26499	4.85056	5.50461	5.20678	5.46749	5.40455	5.42305	5.65517	5.29775	6.07242	6.16376	6.15769	6.54693	6.43079	6.54457	6.9324	6.78109
P63248	4	Pkia	3.12838e-06	4.02735	4.49854	4.38392	3.884	4.44023	4.62636	5.19285	5.12915	5.35451	5.03721	4.3768	4.24984	4.47943	4.36001	4.00225	2.70152	3.82407	3.68691	3.25764	3.4235
P63280	3	Ube2i	6.20086e-06	5.83516	5.37984	5.48564	5.85582	5.27877	4.91469	4.77452	4.68031	5.01401	4.5156	4.52622	4.57247	4.57506	4.51793	4.73007	4.46865	4.18358	4.39243	4.81903	4.49343
P63300	4	Selenow	2.86323e-06	8.25805	8.6664	8.45255	8.31502	8.20715	8.35274	8.07302	7.97819	8.38027	8.20764	7.8586	7.50051	7.84858	8.11401	7.59937	7.65239	7.54664	7.87141	8.08041	8.19086
P63318	5	Prkcg	0.00253776	5.73847	7.25166	9.07857	7.85471	8.04665	11.0918	11.0201	11.4116	11.1495	11.2548	11.6034	11.7987	11.6045	11.7754	11.7068	11.3122	11.3357	11.4172	11.4573	11.3878
P63321	4	Rala	1.58878e-07	9.3985	9.32071	9.188	9.16477	8.9606	9.16671	9.14433	8.91503	9.29378	9.15008	8.98652	8.61992	8.94462	9.08488	9.05607	8.99145	8.84836	8.90432	9.27239	9.10109
P63323	3	Rps12	0.102051	9.06685	8.75616	8.84112	9.46864	9.41695	7.92836	7.85603	7.5453	7.7054	7.81097	7.49366	7.54675	7.58023	7.36744	7.55845	6.97074	6.65831	6.72095	6.37521	6.68616
P63325	3	Rps10	1.93846e-09	9.35093	9.03598	8.76309	9.16776	8.82054	7.5886	7.95751	8.14584	8.15725	7.65127	7.37324	7.58415	7.98157	8.04213	7.78734	7.29238	7.2731	7.28585	7.62927	7.25015
P63328	5	Ppp3ca	2.5347e-07	6.72621	6.86557	7.79849	7.54051	7.49045	8.69968	8.6799	8.86343	8.49851	8.60468	9.47131	9.08852	9.897	9.57214	9.9406	10.3752	10.1935	10.0519	10.4652	10.3074
P63330	5	Ppp2ca	5.88525e-09	9.01035	8.90655	9.10144	9.21927	9.16343	9.5353	9.19976	8.93332	9.27146	9.59908	9.66244	9.4037	9.37375	9.46193	9.27673	9.35319	9.4526	9.38148	9.1567	9.14058
P67778	6	Phb	0.0502543	9.6803	9.32013	9.81486	10.055	9.67835	9.39672	9.38103	9.16672	8.98403	9.19213	9.44781	9.00651	9.4216	9.1189	9.8987	10.2578	9.48466	9.60306	10.2434	10.209
P68040	3	Rack1	0.626563	8.71988	8.38729	8.49824	8.66748	8.17505	8.08085	8.11617	7.80354	7.93845	7.80633	7.78853	6.87206	7.71311	7.54107	7.79893	7.49021	6.91859	7.2712	7.48576	7.46274
P68134	8	Acta1	3.6304e-05	9.08672	8.21597	9.02102	8.78631	8.08557	8.88533	9.40869	9.36375	8.8055	8.84971	8.76778	7.71801	8.48655	8.63996	8.71104	9.01285	8.48439	8.06803	8.50273	8.56028
P68181	1	Prkacb	0.113806	5.36994	5.06175	5.77058	5.8239	5.66928	5.68207	6.23161	6.45294	6.13673	5.75841	5.35257	5.70734	5.65665	5.65784	5.87359	6.09762	5.66506	5.28688	5.96624	5.85306
P68254	8	Ywhaq	0.0785594	8.29735	7.9337	8.26755	8.10003	7.84902	8.1839	8.68075	8.78009	8.38172	8.30246	7.97529	7.49405	8.13324	8.13192	8.2433	7.98982	7.63545	7.50562	7.79005	7.78894
P68368	5	Tuba4a	0.00239627	4.71803	5.06468	6.42552	5.87514	4.62328	7.68714	7.65338	8.07169	7.47516	7.88444	8.56334	8.12087	9.32749	8.78779	9.16448	10.1116	10.0998	9.82009	10.1508	10.1774
P68369	4	Tuba1a	5.98017e-09	9.77911	9.59598	9.41571	9.59806	9.38276	9.61363	9.91738	9.63932	9.67018	9.72042	8.93659	8.70395	8.93174	8.87112	8.66011	8.40277	8.3132	8.19731	8.17545	8.35805
P68372	5	Tubb4b	9.80785e-10	6.66651	6.65884	7.40644	7.21045	7.35901	7.95528	7.83756	7.45415	7.5983	8.01669	8.38253	7.9179	8.36759	8.18909	8.50212	9.11198	9.02258	8.74979	9.10614	9.132
P68404	5	Prkcb	1.21066e-07	7.84694	7.66656	8.68666	8.22408	8.56612	9.54338	9.56182	9.73219	9.70359	9.85276	10.0488	10.4047	10.3406	10.2386	10.3496	10.4983	10.5368	10.4738	10.6401	10.5527
P68510	8	Ywhah	4.96568e-09	9.74868	9.39641	9.89433	9.59428	9.08467	9.84177	10.389	10.5465	10.1245	9.92834	9.73478	9.16614	9.98999	9.96458	10.1579	9.79777	9.42821	9.20716	9.75013	9.60073
P69566	2	Ranbp9	0.0255912	5.77842	6.01564	6.31228	5.86747	6.0905	6.48019	6.17486	6.2478	6.56493	6.75469	6.61422	6.97175	6.35793	6.67078	6.66781	6.17621	6.33435	6.20244	6.2165	6.41637
P70175	5	Dlg3	0.817764	8.978	9.13883	9.41626	9.2293	9.16958	10.0861	10.2149	10.4929	10.2565	10.2884	10.4158	10.2886	10.5243	10.531	10.4665	10.2289	10.3486	10.034	10.2545	10.309
P70188	3	Kifap3	5.27022e-09	6.8365	6.53554	6.24325	6.60682	6.44411	5.90697	6.36701	6.35704	6.22075	5.78654	5.21756	5.24272	5.53745	5.36591	5.27025	5.66719	5.58362	5.10073	5.48148	5.46672
P70195	3	Psmb7	8.82872e-07	7.31297	7.07781	6.61042	7.09658	7.07857	6.09591	6.50196	6.43529	6.2	6.2618	5.60122	4.87905	5.89348	5.77465	5.79859	5.68888	5.49508	5.42949	5.83022	5.6952
P70206	4	Plxna1	1.62522e-06	8.24584	8.45111	8.74163	8.56876	8.26858	9.05672	8.95293	8.87297	9.1422	9.35356	8.96048	8.75507	8.49859	8.92541	8.63843	8.05787	8.14524	8.15698	7.84492	8.08662
P70211	3	Dcc	3.15155e-06	4.75751	4.4563	4.1069	4.65074	5.03918	4.20969	3.36629	3.55044	3.95211	4.25094	3.41716	3.18133	3.57462	3.57418	3.46308	1.71363	2.75164	3.3346	2.75742	2.71643
P70232	3	Chl1	2.12797e-05	9.2448	9.21058	8.75029	8.72206	9.31289	8.05784	7.86222	7.25922	8.13985	8.17393	6.74664	7.04071	6.28058	6.30557	6.09023	6.04384	6.44027	6.68194	5.86392	6.27641
P70236	3	Map2k6	1.76569e-08	6.62534	6.17408	6.36458	6.47884	6.39186	5.96552	5.65793	5.67146	5.83078	5.76831	5.52669	5.44845	5.6311	5.37094	5.74919	5.78065	5.52349	5.72627	5.67257	5.71975
P70268	4	Pkn1	0.39719	5.69886	5.78641	5.20979	4.78254	5.09046	5.13358	5.15958	4.8332	4.9956	4.89221	3.95983	3.6283	3.84563	4.12074	3.90591	3.60486	3.4146	3.48299	3.33565	3.08791
P70296	5	Pebp1	3.80113e-08	7.62394	7.36235	7.85017	7.54035	7.52416	7.67244	7.83839	7.95033	7.82352	8.05388	8.08501	7.81616	8.04561	8.26042	7.97701	8.23475	8.312	7.88306	8.01836	7.92879
P70297	1	Stam	0.0015161	7.28722	6.74872	6.77511	6.60861	6.1373	7.20971	7.54362	8.12815	7.77693	7.49931	7.44847	7.50838	7.57204	7.8301	7.78568	7.75892	8.00935	7.45423	8.12741	7.92274
P70318	3	Tial1	0.000207327	4.75541	5.22368	4.85245	5.05132	5.067	4.34889	4.04313	3.98937	4.15942	4.17375	4.30661	4.33321	4.34568	4.42673	4.43066	3.75952	3.90353	4.04039	4.56544	4.35797
P70336	5	Rock2	2.74714e-05	8.85133	8.75022	9.09674	8.93617	8.86935	9.74613	9.73544	10.1862	9.9873	10.0123	10.5605	10.8481	10.9474	10.8961	10.9923	11.2472	11.5447	11.0815	11.6433	11.5941
P70349	3	Hint1	2.83823e-10	7.60737	7.08934	7.64832	8.03963	7.25753	6.75536	6.96656	7.08376	6.80062	6.74518	6.64313	6.72863	7.03855	6.95637	6.89339	7.17349	7.00641	6.80741	6.93584	6.90971
P70362	3	Ufd1	0.000867736	5.11902	4.70039	5.03232	5.41912	4.98023	4.86641	4.43399	4.45774	4.56169	4.74522	4.66742	4.62162	4.63588	4.73769	4.70086	3.97021	4.54489	4.32547	4.41879	4.45067
P70372	7	Elavl1	0.000543312	5.26905	4.33995	5.68432	6.16402	5.73861	4.876	4.74081	4.54209	4.54966	4.6655	4.66396	5.14061	4.67595	4.41964	5.03634	4.7248	4.09929	4.73735	4.81919	4.83475
P70398	8	Usp9x	0.0287298	10.5209	10.3658	10.2772	10.1693	10.0266	10.7787	10.8917	11.0588	11.105	10.9603	10.7957	10.4671	10.8444	11.0418	10.7532	10.4107	10.5689	10.3186	10.6736	10.5363
P70399	3	Tp53bp1	8.21697e-05	5.06249	4.86215	4.84403	5.2466	5.16744	3.77279	3.8758	3.60208	4.05147	4.07955	2.83777	3.0188	3.46056	2.55589	2.95575	2.50106	1.74439	2.88923	1.01344	3.92161
P70404	6	Idh3g	3.56938e-05	5.18838	4.8539	5.8049	5.48999	5.41031	5.7027	5.63953	5.39435	4.96503	5.49974	6.0223	5.26634	6.17811	5.72216	6.77942	7.32748	6.28739	6.72618	7.19821	7.40544
P70414	4	Slc8a1	0.000110517	6.9177	6.59073	6.99076	6.64997	6.99153	7.2445	7.2056	6.91744	7.25666	7.40296	6.87259	6.83344	6.92224	6.92497	6.81275	6.88382	6.95359	6.64636	6.83745	6.85511
P70429	4	Evl	0.00276297	6.77392	6.47083	6.29038	6.04305	5.80056	5.52944	6.17981	6.36396	6.20896	5.81005	5.28246	5.10765	5.41899	5.20838	5.1722	4.96187	4.94246	4.53515	4.76267	4.71227
P70441	6	Slc9a3r1	1.8132e-06	4.89275	3.4139	4.91167	4.91977	5.48295	4.91107	4.64631	4.59048	4.74284	4.94004	5.53054	5.20943	5.76925	5.09304	5.82689	6.64241	5.7579	5.99936	5.8756	6.11165
P70451	4	Fer	0.000955726	5.38219	4.7975	5.416	4.58521	5.40153	4.9546	5.0288	5.21346	5.44692	5.58554	4.71011	4.91743	4.98952	5.17027	4.88825	4.31935	4.46824	4.33837	4.43136	4.46695
P70670	3	Naca	0.000714026	8.93852	8.80218	8.72374	9.20872	8.82905	7.94557	7.88972	7.5996	7.83143	8.01299	7.52857	7.26578	7.60607	7.82762	7.50578	7.06211	7.34878	7.34794	7.45475	7.42223
P70677	4	Casp3	1.15059e-08	8.95686	8.64959	8.37414	8.43715	8.25211	7.70876	8.02875	7.32142	7.61404	7.61375	6.17062	5.43546	5.62705	5.61742	5.54684	4.73849	4.70035	4.85475	3.70877	4.42907
P70698	4	Ctps1	4.50389e-10	7.14015	7.43527	6.97736	6.79972	6.22442	6.59267	6.92518	6.61777	6.70467	6.59286	5.90427	5.10162	6.0386	5.8966	5.70362	5.04767	5.31084	5.05536	5.21133	5.17307
P70704	5	Atp8a1	7.80221e-07	7.73512	7.89448	8.04615	7.8907	8.01313	8.60637	8.76929	8.96008	8.82793	8.80144	9.16057	8.69191	8.98532	9.12144	9.00959	9.30033	9.40687	9.22355	9.48757	9.52367
P80313	3	Cct7	4.45705e-09	7.65142	7.29588	7.67777	7.69151	7.21717	7.03089	7.11671	6.99696	6.87038	6.86835	6.67574	6.49687	6.7558	6.57073	6.75542	6.69168	6.32807	6.64907	6.74075	6.83431
P80314	3	Cct2	3.18652e-06	7.41008	7.09381	7.62869	7.70126	7.57174	6.69134	6.81722	6.66134	6.55939	6.54556	6.89861	6.42869	6.32486	6.15447	6.39282	6.50421	6.13823	6.03093	6.15695	6.12573
P80315	3	Cct4	1.00479e-06	9.94897	9.8493	9.97031	10.2585	9.97442	9.30844	9.29107	8.91352	8.98796	9.23337	9.04324	8.7523	9.0209	8.80497	8.96282	9.01113	8.78244	8.97701	8.91547	9.03811
P80316	3	Cct5	3.87799e-08	8.22097	8.16576	8.31935	8.58275	8.17898	7.98149	7.73317	7.43777	7.58795	7.75212	7.76381	7.53131	7.65648	7.52076	7.57865	7.45884	7.45188	7.66956	7.51706	7.50609
P80317	3	Cct6a	3.96078e-06	9.29481	8.90647	9.15337	9.31356	9.14311	8.79346	8.66299	8.41345	8.57766	8.74083	8.53747	8.47459	8.61137	8.3904	8.44272	8.34281	8.21398	8.53793	8.27144	8.30869
P80318	7	Cct3	7.98561e-07	9.81222	9.60214	9.72225	10.1295	9.9424	9.20199	8.89742	8.42675	8.76758	9.0661	8.82016	9.12272	8.83634	8.59894	8.80016	8.6872	8.49903	8.82654	8.76979	8.83412
P80560	5	Ptprn2	2.76229e-06	4.10883	4.66418	4.58879	4.14465	3.67302	5.50568	5.2106	5.68575	5.55606	5.68925	5.62369	5.58962	5.77216	5.77246	5.84315	5.55164	5.62956	5.46414	5.52029	5.49163
P81122	4	Irs2	2.87432e-07	6.07541	6.08085	6.19681	6.33369	6.295	6.35355	5.87559	5.67197	6.41204	6.42164	5.72714	6.62712	6.33925	5.80192	5.84653	5.36499	5.85075	5.8914	5.6391	5.68188
P83510	4	Tnik	0.0583804	8.07501	7.99851	8.05891	7.91016	8.15295	8.39152	8.34532	8.23538	8.42335	8.57689	8.29613	8.05558	8.21636	8.30802	8.18672	8.02971	8.18116	7.85527	7.88366	8.01327
P83741	5	Wnk1	0.000235294	7.44313	7.47161	7.59426	7.60091	7.66573	7.38524	7.39653	7.64894	7.87704	7.84929	7.64001	7.83163	7.89057	7.63533	7.65608	7.70336	8.02806	7.79169	7.60505	7.71166
P84075	5	Hpca	0.205804	4.02227	4.26828	5.10016	4.39469	5.84554	6.16994	6.09783	6.34082	6.25183	6.40244	6.69799	7.15132	7.10295	6.94529	6.78897	7.14049	7.12804	7.25098	6.99035	6.99534
P84084	8	Arf5	6.04956e-07	8.90316	8.74617	8.73684	8.87397	8.54611	8.83853	9.05319	8.71149	8.92802	8.95224	9.04	8.30693	8.84955	9.16441	8.82672	8.48954	8.44937	8.39817	8.66878	8.54697
P84089	3	Erh	0.0384866	7.93647	8.0716	8.30031	8.42803	8.18632	6.73128	6.40404	6.02507	7.24336	6.99105	6.32112	7.22731	6.99019	6.8382	6.71077	6.18929	6.12762	6.19528	6.1342	6.21234
P84091	5	Ap2m1	5.49859e-07	8.85848	8.91693	9.25895	9.10257	9.08298	9.72898	9.80823	10.0726	10.0483	9.88386	10.1972	9.95939	10.4205	10.5014	10.4458	10.7766	10.746	10.7013	11.108	10.9665
P84104	3	Srsf3	5.35071e-09	8.4099	8.23878	7.65444	8.75592	9.29326	7.09863	6.5506	6.21548	7.16562	7.26157	6.81493	7.3627	6.88374	7.02331	6.43719	6.02352	6.74539	6.74399	6.19376	6.21727
P84244	3	H3-3a; H3-3b	2.10489e-05	11.507	11.1134	10.6973	11.2017	10.5236	9.12827	9.62471	9.51253	9.6592	9.20707	8.9747	9.06068	9.42234	9.6899	9.13552	9.12804	9.04282	9.1437	9.52348	9.23266
P97300	5	Nptn	2.72125e-07	6.93267	7.07037	7.91252	7.68455	7.32115	8.36506	8.24668	8.55927	8.71059	8.44301	9.10381	9.24132	9.49132	9.63133	9.53392	9.63562	9.70312	9.8505	9.95536	9.6121
P97315	6	Csrp1	7.89982e-09	6.913	7.02881	6.8198	6.93204	6.97084	7.13721	6.62459	7.02805	7.04	6.99979	7.56009	8.16242	8.3082	7.99838	8.21458	8.34262	8.38613	8.45429	8.89291	8.9185
P97351	3	Rps3a	3.07222e-08	9.90758	9.58561	9.76026	10.1079	10.047	8.9313	8.94326	8.71763	8.86492	8.83378	8.40796	8.16307	8.52815	8.36648	8.56827	8.1049	7.97962	8.3131	8.32627	8.28017
P97370	6	Atp1b3	2.19446e-09	4.09281	4.56499	4.48299	4.03009	4.08259	4.60497	4.70621	4.80208	4.85856	4.51057	4.05383	3.32476	4.84665	4.81319	4.78282	5.5599	5.23878	5.26432	5.46601	5.33983
P97371	4	Psme1	0.00124442	7.64666	7.22938	7.2795	7.03292	7.12427	7.00161	7.37337	7.13769	7.29368	7.07403	5.92128	5.8734	5.98991	6.15214	5.71943	5.82641	5.60945	5.22216	5.68786	5.74887
P97379	3	G3bp2	5.63031e-09	8.09342	7.8148	7.81168	8.09965	7.7202	6.53255	6.79581	6.89173	6.92606	6.80624	6.34423	6.85478	7.0976	6.93587	7.03357	6.54156	6.99286	6.79445	7.08021	6.98067
P97384	6	Anxa11	2.37481e-06	5.65888	5.88635	5.62122	5.46521	4.92584	6.02363	5.81128	6.11509	6.23228	6.43967	6.14467	6.37976	6.80466	6.7312	6.67778	7.82458	7.94886	7.869	8.82926	8.67727
P97393	2	Arhgap5	7.38135e-08	4.62312	4.45352	4.80852	4.52115	4.54698	5.46849	5.42486	5.52942	5.54306	5.30771	5.36469	5.49623	5.60021	5.37938	5.21643	4.96752	5.36849	4.74226	5.30958	5.04365
P97411	5	Ica1	3.72499e-06	7.89076	8.09418	7.98219	7.62675	7.51508	8.48749	8.77144	8.82244	9.00215	8.77051	8.58397	8.45211	8.62264	8.86768	8.8034	8.4193	8.43102	8.33534	8.64623	8.41353
P97412	5	Lyst	4.70853e-06	3.61506	4.30193	4.22907	4.07753	4.44699	5.12079	4.84429	5.09008	5.34505	5.26962	5.52213	5.91966	5.66211	5.67728	5.45536	5.5406	5.73175	5.10669	5.71282	5.62898
P97427	4	Crmp1	4.3014e-07	11.1537	11.0217	11.0077	11.0601	10.9291	11.0903	11.0548	10.8045	11.053	11.2379	10.7458	10.6336	10.4647	10.5951	10.4077	9.77097	9.67722	9.73088	9.63986	9.73818
P97434	5	Mprip	5.20391e-10	7.59827	7.4033	7.49217	7.85218	7.98249	7.94892	7.56552	7.85498	7.87806	7.98751	8.19652	8.32986	8.27334	8.25801	8.03735	7.79541	8.15455	7.89508	7.81574	7.85082
P97445	5	Cacna1a	0.00161617	3.74755	4.23092	5.03889	4.46835	4.27	5.55468	5.78107	6.30261	6.25456	6.25735	6.55033	6.54801	6.82388	6.70034	6.7975	7.22157	7.26036	7.213	7.21883	7.06261
P97447	5	Fhl1	6.81158e-09	7.10392	7.79007	7.71039	7.39541	7.2948	7.77367	7.79533	8.44846	7.99505	8.07239	8.30795	7.73161	7.97951	8.36866	8.31633	8.04026	7.90024	7.56427	8.01796	7.94051
P97450	7	Atp5pf	0.00562841	5.34754	5.04348	4.87424	5.08315	6.42732	4.88583	4.34376	4.32413	5.94293	5.50732	5.64377	7.70049	6.5722	6.72481	5.3394	5.85148	6.30151	6.19525	5.31444	5.6482
P97461	3	Rps5	0.0362267	9.50105	9.73359	9.48896	9.97579	9.84769	8.84529	8.47543	8.32654	8.84482	8.72287	8.54916	8.74923	8.53835	8.58585	8.41228	7.9197	8.07439	8.52816	8.18392	8.10474
P97765	1	Wbp2	9.44944e-08	6.859	6.21943	6.73515	6.10912	5.76543	7.15473	7.7133	8.23819	7.62904	7.40924	7.21046	6.58929	8.17901	8.01871	8.01814	8.65399	8.47711	7.98853	8.75997	8.64098
P97789	4	Xrn1	5.71013e-05	6.9402	6.50814	7.03059	6.79121	6.85225	7.04452	7.17562	7.09887	7.49312	7.3058	6.45833	6.45774	6.62448	6.59485	6.36321	6.15646	5.89989	6.15113	5.84877	6.08985
P97792	4	Cxadr	1.43535e-07	9.23857	9.36492	8.92266	8.88119	9.25964	9.01292	9.21149	9.31895	9.24884	9.50525	8.42428	8.11373	7.62255	8.1673	7.77086	5.68871	5.93363	5.34368	5.33569	5.65463
P97797	5	Sirpa	1.56224e-10	5.47698	5.74527	5.97286	5.93947	5.987	6.46334	6.40583	7.35038	7.04871	6.8043	7.07991	7.68232	7.73161	7.77556	8.02796	7.81054	8.07188	7.66622	8.40175	8.33905
P97798	4	Neo1	2.15179e-07	7.11048	6.54933	7.00308	6.35506	6.65314	6.38216	6.91891	7.07431	6.89897	6.97191	5.53898	5.74591	5.63451	5.59872	5.42637	4.89143	5.2761	4.68035	4.54812	4.77807
P97807	6	Fh	1.76229e-08	7.34733	7.07129	7.9855	7.75331	7.28318	7.76635	7.6965	7.58892	7.42398	7.50224	8.09028	8.02612	8.23504	8.05217	8.70773	9.01333	8.35788	8.65047	9.01419	8.95325
P97868	3	Rbbp6	1.10176e-05	4.42169	3.86734	4.45455	4.48967	4.61171	3.50935	4.40169	4.08171	4.15813	4.10714	4.21365	3.49565	4.32696	4.19343	4.08299	4.31469	3.67677	3.82271	3.67459	4.02528
P98200	4	Atp8a2	0.24629	5.49361	5.51061	5.51784	4.8117	5.01998	5.5146	5.83642	5.62217	5.49484	5.57157	4.71189	4.35401	5.12395	4.93437	4.7634	4.64918	4.09424	3.96998	4.48069	4.52545
P98203	3	Arvcf	2.06749e-05	6.81849	6.62895	6.42389	6.64743	6.42342	6.53138	6.43737	6.4823	6.81636	6.95242	6.36646	6.51846	6.33723	6.51225	6.16388	6.09289	6.10471	6.20102	6.02651	6.22358
P99024	3	Tubb5	0.000833302	9.16873	9.03649	9.02668	9.22182	9.07987	8.9372	8.73102	7.90015	8.43473	8.8507	8.18079	7.85295	7.98557	7.7279	7.75221	7.60396	7.65924	7.74272	7.53449	7.6515
P99026	3	Psmb4	5.04853e-07	7.53353	7.21887	7.11254	7.43605	7.15388	6.26685	6.33367	5.89242	5.72185	5.90065	5.62652	4.89102	5.63775	5.33636	5.67163	5.85317	5.33439	4.88832	5.37703	5.43398
P99027	3	Rplp2	1.63744e-07	6.25051	5.87528	6.76956	6.44296	6.62658	5.05494	5.07902	5.12811	5.01545	5.28484	4.82033	5.20901	5.30073	5.27476	4.15705	4.52001	4.37948	4.61812	3.56629	4.44959
P99029	5	Prdx5	3.63592e-06	8.04825	7.84441	8.42669	8.70149	8.49522	8.78689	8.58755	8.45051	8.76555	9.04074	9.2224	9.26673	9.32493	9.37383	9.38198	9.86501	9.55284	9.75981	9.80051	9.70327
Q00612	3	G6pdx	3.41516e-07	7.53978	7.78045	7.3703	7.30297	7.20079	7.38279	7.01931	6.65803	7.28717	7.31218	6.85206	6.89758	6.93616	6.67939	6.48308	6.58482	6.57354	6.59206	6.57974	6.55893
Q00PI9	3	Hnrnpul2	6.75248e-05	7.17391	6.61364	7.20418	7.31359	7.12408	6.19049	6.16012	5.78383	6.18437	6.26783	5.74511	5.87935	5.9846	6.04956	5.93587	5.59847	5.60077	6.07686	6.09153	6.01676
Q01063	5	Pde4d	1.12375e-06	6.41408	6.34584	6.7935	6.4447	6.68893	7.12058	7.03482	7.15697	7.3502	7.39304	7.36247	7.49985	6.97607	7.36133	7.13098	6.98154	7.45071	7.27675	7.06644	6.99817
Q01065	5	Pde1b	8.83681e-05	6.09144	6.22529	7.01892	6.689	6.3401	7.24127	7.15677	7.30919	6.89042	6.86951	7.93335	8.03715	8.7754	7.88282	8.28069	8.40932	8.40919	8.57428	8.55146	8.63755
Q01097	5	Grin2b	7.26828e-08	5.28489	5.10795	5.45294	5.2356	5.50922	5.48336	5.35032	5.17462	5.55447	5.5523	5.90252	6.2634	6.84098	6.26033	6.28867	5.83642	6.25561	6.1015	6.39858	6.26367
Q01405	3	Sec23a	8.11805e-06	7.69455	7.56936	7.41136	7.54111	7.35285	7.29535	7.04032	6.79305	7.43708	7.52242	7.25608	7.31599	7.28823	7.35051	7.23877	7.14396	7.28062	7.25217	7.25638	7.37355
Q01768	3	Nme2	0.0698425	8.71869	8.31607	8.4108	8.26216	8.23312	7.51516	8.02262	8.1245	8.17085	7.74118	7.18537	7.3985	7.77891	7.62186	7.83198	7.65618	7.27818	7.18016	7.69374	7.32396
Q01853	2	Vcp	0.000112897	10.5333	10.488	10.4946	10.5332	10.4852	10.7208	10.7865	10.8386	10.885	10.984	10.7491	10.6701	10.8505	10.8685	10.7667	10.3488	10.3672	10.1451	10.4243	10.3374
Q02053	3	Uba1	3.67418e-07	10.5116	10.5292	10.4069	10.578	10.657	10.3125	10.232	10.0243	10.3828	10.4405	10.0091	9.98135	10.0061	10.0547	9.83156	9.92396	10.0171	10.101	10.0218	10.0311
Q02248	4	Ctnnb1	2.71897e-06	10.0006	10.0831	9.86739	9.93325	9.89992	10.2074	10.1644	10.1609	10.401	10.5344	10.3391	10.2059	10.0094	10.3796	9.98271	9.68802	9.87586	9.83428	9.86104	9.82442
Q02257	7	Jup	0.000294942	10.0253	9.63924	8.87041	11.61	9.2647	8.80416	8.72421	8.38311	8.40015	8.4375	7.83608	8.34887	8.07669	7.65414	7.39841	8.68262	8.91158	8.53795	8.01744	9.63747
Q03137	2	Epha4	0.001795	8.095	8.39358	8.3406	8.21899	8.38955	9.13572	9.06513	9.17167	9.33903	9.32967	9.08895	9.06736	8.77756	9.15434	9.02853	8.55793	8.59799	8.59612	8.70112	8.62161
Q03141	2	Mark3	3.73671e-08	6.51033	6.9523	7.14024	6.92094	7.21402	7.35444	7.54333	7.6105	7.6449	7.64895	7.26976	7.4325	7.26753	7.43399	7.39301	6.87637	7.25158	6.91459	7.06165	6.99215
Q03173	4	Enah	0.000168263	7.48483	7.13974	6.78631	7.17328	6.95383	6.56556	6.59805	6.37093	6.75956	6.6647	5.98052	5.61834	5.57197	5.66123	5.53132	5.3313	5.07005	4.39428	5.11867	5.006
Q03265	6	Atp5f1a	1.53683e-08	10.3955	10.1527	10.8335	10.9116	10.467	10.6425	10.902	10.824	10.2922	10.5288	11.1456	10.4034	11.3227	11.1023	11.7526	12.289	11.6674	11.6961	12.355	12.2811
Q03958	3	Pfdn6	3.71471e-05	7.79581	7.55288	7.52195	7.92122	7.69348	6.59681	6.66315	6.15098	6.619	6.51453	6.15806	6.05288	6.26578	6.10718	6.17967	6.11882	6.0014	5.71275	5.71419	6.08594
Q04447	6	Ckb	2.51125e-09	8.92605	8.53986	9.17712	9.07864	8.85164	9.15628	9.33521	9.43994	9.08772	9.25564	9.77086	9.69413	10.3738	9.91315	10.3048	11.0278	10.86	10.6198	10.8955	10.8791
Q04690	5	Nf1	1.34642e-08	7.9013	8.06392	8.16378	8.1974	8.22571	8.5695	8.55356	8.75345	8.73359	8.73971	8.89896	8.64642	8.70518	8.81019	8.63552	8.65304	8.83669	8.59511	8.57034	8.63987
Q04735	2	Cdk16	1.27718e-06	5.42533	5.46757	5.85516	5.18381	5.61883	5.76428	5.5309	5.65462	5.92921	6.16592	6.23865	6.07719	6.01982	6.20301	6.2821	5.63311	5.53919	5.61435	5.46832	5.49314
Q04750	3	Top1	0.000251914	6.18785	5.63274	6.29735	6.22809	5.26075	5.40648	5.07518	5.22153	5.4494	5.42369	4.70559	4.88602	5.36292	5.47646	5.10507	5.15357	4.73572	5.09662	5.24305	5.26273
Q05186	4	Rcn1	0.00260641	3.01201	4.12243	3.7243	3.18175	3.6554	3.60933	3.56223	3.29679	3.97683	4.11787	3.24151	3.8764	4.0522	4.06993	3.21108	2.67647	3.55193	3.08095	2.92327	2.84634
Q05816	4	Fabp5	0.0463346	9.20214	9.02879	9.44984	9.15435	9.27879	8.03954	8.12189	7.80504	8.27081	8.34484	7.65161	7.63805	7.72287	7.74823	7.31249	6.57441	6.49017	6.53672	5.73633	6.13272
Q05BC3	4	Eml1	1.0001e-09	7.74073	7.30369	7.5641	7.73206	7.5514	7.38376	7.4621	7.27774	7.28715	7.5156	7.16393	6.86829	7.10963	7.05258	6.88969	6.64127	6.29197	6.49147	6.1937	6.6344
Q05D44	7	Eif5b	1.44847e-07	4.30925	4.96575	4.53157	4.77279	4.57481	3.17318	2.21349	2.93032	3.92747	3.84792	3.30875	5.10687	3.99562	3.63344	3.75721	4.38283	3.82077	4.68563	3.79281	3.82104
Q06185	6	Atp5me	0.00976064	6.17435	6.62048	6.75724	6.91155	7.23722	6.64244	6.26209	6.34997	6.68546	6.78405	7.02865	7.51173	7.37888	7.40534	7.16334	7.44041	7.84813	7.95877	7.83429	7.87158
Q06649	4	Sh3bp2	1.2676e-05	7.24966	7.4417	7.02567	7.14081	7.57306	6.40994	5.87602	5.10165	6.29962	6.39163	4.84355	4.97375	4.30368	4.56124	4.23293	2.58431	2.35643	3.21241	0.825369	2.99161
Q07076	5	Anxa7	2.72683e-08	8.33793	8.46381	8.80787	8.26292	8.47013	9.43826	9.54885	9.63278	9.68347	9.81533	9.49886	8.90768	9.44512	9.79688	9.68979	10.4058	10.3455	10.055	10.5433	10.4037
Q07813	3	Bax	6.63079e-08	6.17999	6.79449	6.4644	6.6329	6.74794	5.65272	5.34537	4.94115	5.49903	5.53514	4.94148	5.03031	4.7006	4.77368	4.38469	3.91653	4.21757	4.48466	3.93531	4.14608
Q08274	5	Dmwd	7.73303e-09	4.54351	4.92395	5.11319	5.23693	4.8601	5.20136	5.13827	5.31881	5.16548	5.26621	5.62177	5.99475	5.2362	5.2757	5.29969	5.13547	5.56675	5.3721	4.85148	5.1304
Q08460	5	Kcnma1	0.0319933	1.37048	3.5225	3.76706	2.67023	2.54204	3.77414	4.06479	4.49824	4.02101	4.21483	4.44798	4.12265	4.53797	4.67722	4.6317	4.91437	4.8971	4.60935	4.89426	5.08856
Q09143	3	Slc7a1	8.24087e-05	6.10163	6.47103	6.10717	6.47155	6.49494	5.44275	5.55034	4.96374	5.51368	5.56213	4.7095	4.02305	4.39164	4.74313	3.98346	3.74985	4.3333	4.15195	3.91151	4.08835
Q0KL02	4	Trio	1.36486e-08	10.2114	9.95708	9.89866	9.79795	9.47078	9.9583	10.2359	10.2004	10.1543	9.9587	9.65161	9.28074	9.70621	9.91474	9.71804	9.43108	9.51038	9.11799	9.41725	9.31261
Q0PHV7	3	Dact3	0.000365749	4.16001	3.98646	4.11156	4.5019	3.82799	3.77359	3.7678	3.8912	3.91043	4.36655	3.64797	4.19341	4.20065	4.09943	3.91419	2.75471	3.86874	3.49777	3.82366	3.93408
Q0VBF8	5	Stum	0.0930195	3.58394	3.0202	4.46572	4.29729	3.71084	4.32857	4.62653	5.2137	4.90379	4.64925	5.07377	5.4367	5.16939	5.47248	5.11897	5.43694	5.54768	5.43049	5.89342	5.66021
Q0VE82	4	Cpne7	1.09654e-05	5.43419	6.04509	5.69443	5.82838	6.27791	6.73346	6.55871	6.61324	6.89493	7.10001	6.20364	5.85617	6.37703	6.13831	5.90716	5.46796	5.48566	5.26346	5.26143	5.06815
Q11011	1	Npepps	1.51129e-06	9.3789	9.45918	9.50072	9.40027	9.04672	9.68206	9.92194	9.8194	9.85685	9.83301	9.53982	9.08805	9.63193	9.78222	9.51471	9.70577	9.57486	9.41092	9.64985	9.59507
Q11136	4	Pepd	0.00646468	5.82514	6.12787	5.60009	5.69287	5.50211	5.89888	5.86887	5.84106	6.00782	6.12326	5.71854	5.37964	5.87698	5.48144	5.33054	5.44144	5.6201	5.45817	5.43829	5.42375
Q148V7	5	Relch	0.00520493	7.34235	7.22689	7.48344	7.42717	7.02159	7.70573	7.808	8.0234	8.05105	7.89916	8.00657	8.01213	7.99533	8.11974	8.18165	7.85776	8.08352	7.80615	8.13873	8.01699
Q14BI2	5	Grm2	2.76108e-06	5.93502	6.01808	7.3738	6.70523	6.98841	8.62793	8.48648	8.90861	8.71388	8.86975	9.42229	9.48911	9.21959	9.69534	9.5335	9.64659	9.77442	9.9159	10.0426	9.812
Q14CH0	5	Fam171b	5.6018e-09	4.88617	5.47893	5.21982	5.02059	5.72419	6.09515	6.08195	6.19976	6.44395	6.64121	6.38624	6.37047	6.17795	6.58652	6.29571	5.89834	6.33202	6.00664	6.42484	6.56115
Q2KN98	4	Specc1l	2.81507e-05	6.22874	6.35756	6.03211	6.08264	5.49138	5.85978	6.10691	5.94073	6.25099	6.07237	5.20015	5.23069	5.2607	5.44628	5.20394	4.63979	4.86992	4.61148	4.52284	4.6717
Q2M3X8	5	Phactr1	6.63079e-08	6.52955	6.27402	7.15471	7.10396	7.23267	8.05789	8.03843	8.35424	8.20191	8.43119	8.6757	9.13902	9.01767	8.92843	8.86175	8.79546	9.10236	8.98765	8.98803	9.09196
Q2NL51	1	Gsk3a	1.34099e-08	8.15601	8.27713	8.6139	8.28562	8.46094	8.73145	8.69239	8.57429	8.75825	8.91449	8.72101	8.25969	8.23379	8.41406	8.49295	8.48414	8.58638	8.51526	8.55874	8.52255
Q2PFD7	5	Psd3	0.00711275	8.77564	8.71345	9.10296	8.94987	8.84264	9.60489	9.72883	9.93827	9.80225	9.6976	9.7798	9.67498	10.3307	10.169	10.2777	10.2908	10.3924	10.0175	10.7648	10.5916
Q3B7Z2	5	Osbp	4.09522e-07	7.22233	6.83916	6.90569	6.82691	6.83349	7.01456	7.14772	7.34634	7.50708	7.40642	7.49032	7.38597	7.53143	7.49792	7.66922	7.32833	7.44738	7.44538	7.57612	7.49982
Q3KNM2	7	Marchf5	7.63212e-05	6.20591	6.7477	6.24533	6.73087	6.42374	5.90349	5.65396	5.58291	6.15882	6.05715	6.14323	6.46179	6.14841	6.47972	5.95157	5.44928	5.86744	6.24081	5.74867	5.84534
Q3TDD9	4	Ppp1r21	0.288923	7.4016	7.5371	7.57359	7.61752	7.83881	7.57106	7.52549	7.52731	7.66607	7.91426	7.62932	7.69881	7.55074	7.51184	7.4549	7.09339	7.38194	7.18331	7.08774	7.27066
Q3TDK6	5	Rogdi	0.000687712	5.26559	5.80715	6.77637	6.05831	5.85912	7.15131	6.82026	7.07651	6.7967	7.24147	7.64386	7.57726	7.50479	7.56269	7.86456	8.07975	7.88278	7.78568	8.17577	8.14292
Q3TDQ1	3	Stt3b	3.49188e-07	7.04178	6.99393	6.88056	6.80219	6.79564	6.74509	6.28926	5.86406	6.79036	6.25704	6.51016	6.09587	6.60209	6.66349	6.38905	5.64047	5.67415	6.20558	5.97546	5.94671
Q3TDX8	4	Cyb5r4	0.000245646	5.76117	5.49859	5.91234	5.34888	5.82753	5.76581	6.25348	6.11834	6.06224	5.59277	5.44808	5.89364	5.93438	6.00927	5.95534	5.15792	5.33842	5.15279	3.90689	5.09583
Q3TEA8	3	Hp1bp3	0.00205574	8.83324	8.35566	8.25842	8.9361	9.01207	6.90926	7.28818	7.15334	7.6021	7.45719	7.02098	7.43142	7.47191	7.39966	7.30101	7.52592	7.81098	7.77213	7.54969	7.66875
Q3TEL6	8	Rnf157	9.53771e-07	4.19807	2.95421	3.70051	2.63392	3.3565	3.49736	4.5135	4.68115	4.32743	3.91169	3.3618	2.94557	4.06298	3.81426	4.00352	3.50714	3.18134	2.22339	3.12893	3.047
Q3TES0	5	Iqsec3	0.020362	4.87181	4.67392	5.40174	5.2262	4.8862	5.96904	6.02727	6.37449	6.12484	6.1981	6.42218	6.46106	6.52859	6.38177	6.6548	6.22344	6.4822	6.0811	6.37336	6.27121
Q3THE2	7	Myl12b	4.55449e-08	4.69126	4.1969	4.68321	4.09404	3.1971	2.87973	3.63576	3.98418	3.3197	3.02013	3.5611	3.33469	3.81813	3.8603	3.70998	4.10061	3.81189	3.58072	3.44247	3.36868
Q3THG9	4	Aarsd1	0.0608592	7.52054	7.18209	6.67886	6.28553	6.49567	6.95851	7.12621	6.52258	7.09002	7.14989	5.41602	4.73393	5.48594	5.48512	5.3916	5.2297	4.33886	4.65274	4.36644	4.74997
Q3THK7	3	Gmps	1.93788e-07	7.38572	7.22359	7.37944	7.4246	7.6465	7.08134	6.93672	6.95324	7.27589	7.42019	7.19512	7.2831	7.08481	7.167	7.22819	7.09047	7.0438	7.17934	7.27219	7.39724
Q3THS6	6	Mat2a	0.0574562	6.42386	6.33461	6.70698	6.94966	7.02424	6.58758	6.29723	6.0618	6.28882	6.50086	6.5691	6.65827	6.58509	6.50693	6.71225	7.01786	6.85964	6.96682	7.0549	7.11187
Q3THW5	3	H2az2	0.00107096	7.44836	6.99407	6.99258	7.33465	6.78816	5.4295	5.82381	5.78028	5.96708	5.59702	5.51071	5.70597	5.82734	5.94869	5.84987	6.04723	6.18767	6.14233	6.05752	5.75913
Q3TJZ6	8	Fam98a	1.4825e-07	6.74075	6.37599	6.58399	6.24183	6.09607	6.07659	6.61922	6.72307	6.63898	6.23668	5.86554	5.76038	6.58851	6.51196	6.50682	5.91299	5.87847	5.62618	6.29527	5.86951
Q3TKT4	3	Smarca4	0.0550078	5.67062	6.00978	4.97211	5.20958	4.75919	3.76886	3.63805	3.20401	3.99506	3.99746	2.52157	3.73077	3.25919	3.26491	2.92256	1.03175	2.24664	3.02398	3.54909	3.31245
Q3TLH4	7	Prrc2c	6.15974e-05	6.94711	7.41842	7.1597	7.40584	7.52785	6.75272	6.45532	6.64316	6.96843	6.97064	6.53926	7.34572	7.45529	6.86915	6.76792	6.16838	6.74254	6.78117	6.59129	6.76777
Q3TLI0	1	NA	0.0108662	5.26247	4.0806	5.27892	4.83053	4.69819	5.92025	6.36549	6.39723	6.03706	5.7793	5.81071	5.63382	5.82081	6.14585	5.96822	6.06344	5.90641	5.1268	5.94346	5.75442
Q3TMH2	5	Scrn3	0.000271203	2.24756	2.71029	4.51147	4.06037	4.05728	5.88798	5.51325	6.32762	5.79454	6.04527	7.04964	6.7799	6.86419	6.9325	6.88835	7.18371	7.28374	7.34035	7.26737	7.03393
Q3TPX4	1	Exoc5	9.83782e-08	4.56129	4.86189	4.66017	5.08749	3.90341	4.8735	5.07715	4.89468	4.99338	5.0553	4.72885	4.45226	4.73419	4.86605	4.69127	4.87303	4.76725	4.80487	4.88626	4.78329
Q3TVA9	2	Ccdc136	0.142527	5.83931	5.95427	6.33771	6.51505	6.3306	7.0034	6.87966	6.95859	6.89482	6.79837	6.63889	6.67603	6.67699	6.4052	6.29522	5.96286	6.17018	6.12253	6.05476	6.06871
Q3TWW8	3	Srsf6	0.504292	5.86304	5.37675	5.85846	6.34066	6.19817	4.36884	4.28314	3.86745	4.56902	4.87802	3.9563	3.88363	4.12084	3.75632	3.6487	3.89449	3.64576	4.05907	3.39323	3.30253
Q3TXS7	4	Psmd1	1.20155e-07	4.88792	4.64142	4.77312	4.95734	3.92055	4.9507	4.76743	4.76882	5.03991	4.41888	4.59323	4.32766	4.8821	4.78582	4.85841	3.74531	4.12036	3.92571	4.19758	4.19014
Q3TXX4	5	Slc17a7	0.00382888	1.94026	3.48231	6.34433	5.9392	6.28589	8.71734	8.79083	9.40324	8.57296	8.64857	10.3122	9.44493	9.5352	10.0475	9.87552	10.8793	10.8967	10.6948	10.6011	10.3994
Q3TY60	5	Fam131b	1.59237e-06	5.26332	5.11836	5.42645	5.17449	5.13503	5.85079	6.02415	6.16966	6.59494	6.46131	6.09852	6.28492	5.94254	6.36268	6.1912	6.36664	6.4338	6.1836	6.45281	6.26611
Q3TYX3	4	Smyd5	8.80763e-07	6.05197	6.23371	6.05558	5.82162	5.87224	6.28921	6.45731	6.23068	6.59942	6.51151	5.88036	5.4138	5.82471	6.00465	5.73582	5.78651	5.68161	5.70967	5.68442	5.57861
Q3TZZ7	5	Esyt2	2.35058e-05	4.42581	3.70739	4.51864	3.96177	3.24604	4.61551	4.35508	4.32129	4.67597	4.83834	4.95805	4.65316	4.74033	4.47215	4.72577	4.12232	4.67927	4.61378	4.45563	4.446
Q3U0M1	5	Trappc9	0.0141667	6.07825	5.90163	5.78187	5.40163	5.60224	6.29163	6.32163	6.26607	6.41131	6.52582	6.16484	5.92123	6.27964	6.51253	6.28568	5.83789	6.03427	6.35634	6.25856	6.27324
Q3U0V1	3	Khsrp	0.00231825	8.16021	7.7254	8.64354	8.5522	8.35736	7.72883	7.46209	7.21555	7.37627	7.65123	6.77612	7.44837	7.81165	7.49893	7.47279	7.30309	5.50658	7.10792	7.03328	7.14953
Q3U1F9	3	Pag1	0.00196753	5.34919	5.02101	4.9341	5.5829	5.58575	4.28063	4.44234	3.88036	4.9036	4.8655	4.04539	4.06088	3.88494	3.9323	3.61613	3.95226	3.96561	4.02151	3.24664	3.52863
Q3U1J4	1	Ddb1	1.07148e-05	6.8552	6.38135	6.9585	6.80862	6.43089	7.15384	7.3691	7.64344	7.43388	7.20322	7.32755	6.97536	7.70037	7.68934	7.76645	7.84727	7.73229	7.38858	7.93901	7.98501
Q3U1Y4	5	Dennd4b	0.000100278	3.5311	4.34977	4.60228	3.72599	3.9909	4.60413	4.32	4.34691	5.14215	4.80363	4.67731	5.34616	4.92997	5.06072	4.77057	4.87907	5.20543	4.99577	5.27545	5.38023
Q3U214	5	Mast3	0.000524916	3.52757	3.3281	4.01529	4.18577	4.01278	4.08484	4.49561	4.46917	4.50694	4.2688	5.1981	5.81601	5.78587	5.69304	5.69816	5.35034	5.96518	5.97385	6.14092	5.94312
Q3U2P1	3	Sec24a	4.03164e-08	3.54148	3.8522	3.527	2.448	4.2272	3.37614	3.18962	2.58462	3.84388	3.92597	3.15841	3.56016	2.81024	3.36597	2.70674	2.03009	2.48748	2.78382	3.23937	2.44787
Q3U308	3	Ctu2	0.0635418	6.26379	6.46489	6.05703	5.9322	5.97782	6.02651	5.8439	5.53709	6.23238	6.1796	5.74004	5.84998	5.15579	5.40891	5.39344	4.76989	4.88956	4.56615	4.56281	4.63909
Q3UDK1	3	Trafd1	7.09887e-07	7.09802	7.33991	6.47442	6.83201	7.05755	6.86512	6.45745	6.15562	6.52154	6.67744	6.32066	6.4616	5.34517	5.5442	5.40208	4.82884	5.45472	4.85278	4.46997	4.57825
Q3UEB3	4	Puf60	3.21865e-06	5.1717	4.8005	5.59108	5.67905	4.24265	4.26259	4.9504	4.60834	4.37374	4.37716	3.69281	4.03533	4.06921	3.85993	4.14981	3.70296	3.94929	3.45477	3.88476	3.96881
Q3UFQ8	4	Carmil3	0.000182623	4.1103	4.40509	3.90307	4.51443	4.63193	5.00387	4.76884	4.98953	4.82663	4.82124	4.62438	3.78122	4.09582	4.02479	3.68066	2.64571	2.53853	2.21989	2.27178	3.16032
Q3UFT3	4	Garem1	1.08598e-07	5.73751	6.14192	6.12346	5.98712	6.06493	6.68356	6.52103	6.30933	6.7655	7.11953	6.64011	6.95712	6.2039	6.34676	6.212	5.33485	5.78308	6.01549	5.39698	5.57477
Q3UGS4	7	Mcrip1	0.000120263	3.99506	4.53649	3.2917	3.46905	4.78949	3.31513	2.55742	2.53451	3.81438	3.90442	3.24176	4.78976	4.30934	4.24761	3.4838	2.59594	3.16921	3.32704	3.16186	3.01869
Q3UGY8	5	Arfgef3	0.0342148	7.37168	7.70497	7.55418	7.1483	7.11744	7.90127	7.95422	8.35554	8.22817	8.35811	8.24818	8.2205	8.33079	8.31173	8.36761	7.86785	8.39738	8.05708	8.08683	8.21553
Q3UH60	5	Dip2b	1.38051e-05	7.5357	7.56856	7.55918	7.34897	7.48594	7.74952	7.80146	7.89982	8.02812	7.98413	7.79729	7.87217	8.11467	7.85613	8.08493	7.90853	8.02216	7.86647	8.10629	8.10106
Q3UH66	8	Wnk2	3.38537e-05	9.68242	9.51954	9.31408	9.4543	9.31706	9.51265	9.87495	10.0483	10.2132	9.72768	9.25543	9.42504	9.48031	9.67477	9.58947	9.25978	9.52723	9.19294	9.58533	9.34887
Q3UH93	2	Plxnd1	0.0060176	6.79473	7.62514	7.23714	7.38162	7.22192	8.149	7.97431	7.89524	7.84602	7.77176	8.10443	8.14708	7.50244	7.89688	7.65815	7.05521	7.16185	7.37166	7.03755	6.98923
Q3UHB8	6	Ccdc177	8.50874e-05	4.30411	4.12525	5.09881	4.14809	4.48223	4.68975	4.20054	4.54677	4.9333	5.13262	4.97692	5.77084	5.0863	5.15459	5.2041	5.34621	5.96801	5.9663	5.77349	5.90272
Q3UHC7	2	Dab2ip	8.12373e-05	6.98619	6.73555	6.92402	6.84774	6.81829	7.08189	7.1491	7.37292	7.45693	7.52774	7.23349	7.40171	7.28233	7.44489	7.47168	6.91749	6.99011	7.08628	7.08139	7.05939
Q3UHD1	5	Adgrb1	3.98981e-05	3.40955	4.42809	4.92942	4.89314	4.33269	4.84052	4.6309	4.74047	4.81745	4.90853	5.27695	5.40149	5.16686	5.3171	5.36294	5.2392	5.45555	5.44566	5.59168	5.42835
Q3UHD3	3	Mtus2	0.00054337	5.60801	6.26666	5.4871	4.80571	4.62192	5.50079	5.3359	4.85878	5.34609	5.23286	4.47601	5.01178	4.86896	4.64766	4.78269	4.03807	4.14281	3.70938	4.37689	4.3267
Q3UHD6	5	Snx27	0.000689126	6.05315	5.64705	6.14939	5.97342	5.37054	6.14195	5.99597	6.12528	6.20884	6.28758	6.3465	6.51707	6.56943	6.2723	6.35826	6.44633	6.51762	6.40026	6.59784	6.58837
Q3UHD9	5	Agap2	0.000245263	7.12918	6.96019	7.19351	6.977	7.12913	7.3497	7.48141	8.01547	7.88805	7.79882	7.52616	7.92805	8.25037	8.08159	8.12122	7.29799	7.85993	7.87463	8.21341	8.00402
Q3UHH1	4	Zswim8	0.000485114	3.83459	4.06732	4.13172	3.78711	4.27227	4.44658	4.62635	4.51646	4.71061	4.27897	4.02357	4.09552	4.17869	4.02349	4.02222	3.73063	3.74556	3.03966	3.39043	3.716
Q3UHH2	1	Slc22a23	2.92741e-05	5.41862	4.98416	5.40601	5.47117	5.52318	5.52356	5.68041	5.80392	5.68841	5.69438	5.99578	5.21929	5.70825	5.79832	5.89432	5.93162	5.99954	5.54384	5.94431	5.56201
Q3UHJ0	5	Aak1	0.0381156	7.23254	7.03332	7.68076	7.61669	7.60898	8.39625	8.43528	8.78945	8.73887	8.72341	9.10504	9.33883	9.27618	9.36328	9.45501	9.41242	9.63676	9.41522	9.80745	9.79263
Q3UHK1	5	Slc2a13	2.19446e-09	1.26209	4.4308	3.9476	3.97684	3.52489	4.95045	4.46782	5.1453	5.11104	5.26813	5.48881	5.91421	5.45245	5.54072	5.38491	4.95283	5.19386	5.37543	5.02806	5.44478
Q3UHK6	5	Tenm4	0.000858979	7.08091	7.42737	7.3636	7.01081	7.25754	7.7429	7.39025	7.50832	7.79626	7.92596	7.97489	8.00058	7.54672	7.83273	7.53724	7.72717	7.94177	8.02572	7.67844	7.78738
Q3UHL1	1	Camkv	0.000913832	9.31011	9.12743	9.49696	9.32014	9.18773	10.0307	10.0732	10.0125	9.89847	10.1367	9.99011	8.81815	10.1833	9.83809	10.1208	10.2563	9.48099	10.2852	10.8533	9.95663
Q3UHX2	3	Pdap1	0.0147743	7.32585	6.95	7.22585	7.065	7.43604	6.65808	6.95045	6.79755	7.11767	7.12437	6.48092	6.88706	6.47572	6.6814	6.34347	6.27126	6.51203	6.15626	6.27713	6.42284
Q3UIU2	6	Ndufb6	2.11739e-05	5.01993	5.48107	5.40968	4.82113	5.32322	4.76838	5.22372	5.63549	5.3215	4.83893	5.15789	5.33881	6.01398	6.19722	6.07078	6.00215	6.24088	6.49337	6.88572	6.56634
Q3UJD6	7	Usp19	0.000233773	5.8336	6.20915	6.057	6.65219	6.05284	6.10185	5.81138	6.03811	6.15116	6.07907	6.38283	6.78457	6.50168	6.71238	6.64474	6.11941	6.44836	6.4907	6.55942	6.34016
Q3UJP5	7	NA	0.00297603	4.2668	4.68823	4.02153	4.79791	4.96407	4.44496	4.35758	4.29244	4.69723	4.7221	4.69893	5.30623	4.72769	4.75586	4.74361	4.63791	4.77561	4.81229	5.06664	4.96144
Q3UJU9	6	Rmdn3	0.10999	3.54132	4.25414	3.78114	4.37233	4.60482	4.33486	3.50856	3.80141	4.06508	3.97626	4.69925	4.71265	4.73198	4.47335	4.77539	5.04594	5.39758	4.6584	5.33195	5.44194
Q3UKC1	5	Tax1bp1	9.50556e-05	5.99048	6.21855	5.92015	5.91566	6.37164	5.91831	5.80096	6.20801	6.33164	6.21754	6.38317	6.53853	6.40249	6.46871	6.63012	6.05439	6.55672	6.35738	6.43756	6.24671
Q3UKJ7	3	Smu1	0.0111362	5.6482	5.6677	5.85161	5.8213	5.65314	5.4523	5.52107	5.38478	5.6274	5.22437	5.04715	4.82913	5.19493	4.99986	4.8593	4.89228	4.70981	5.10991	5.02554	5.0461
Q3UL36	3	Arglu1	9.85964e-07	8.57684	8.88415	8.31845	9.20601	9.26527	7.66475	7.19784	7.16898	7.49764	7.59796	7.51763	8.37241	7.82811	8.01147	7.34971	7.17319	7.81441	8.25951	7.57411	7.64367
Q3UM45	5	Ppp1r7	0.0906475	5.3092	5.78287	6.71215	6.22968	5.77073	7.36076	7.09289	7.28547	7.06181	6.98422	7.5665	7.34187	7.47022	7.57052	7.6812	7.86578	7.65878	7.45301	7.75992	7.56329
Q3UMB5	2	Smcr8	1.09528e-06	6.53729	6.61086	6.6079	6.99777	7.1115	7.23455	6.9665	7.14387	7.47505	7.51149	7.31049	7.28816	7.14164	7.37745	7.02226	7.20306	7.17989	7.08559	7.25756	7.06542
Q3UMR0	5	Ankrd27	0.00438408	4.77472	4.12608	4.79541	4.61286	4.52761	5.7369	5.65191	5.99026	5.87107	5.76759	6.23988	6.29477	5.99291	6.37672	6.21556	5.72351	5.99988	5.73764	6.01379	5.9805
Q3UMR5	1	Mcu	9.91502e-09	6.77906	6.22919	6.96296	6.69768	6.44655	7.10398	7.24081	7.10435	6.91373	6.75426	7.14306	5.62083	7.02635	7.01802	7.35481	7.85507	7.29414	6.94503	7.55811	7.52047
Q3UNH4	4	Gprin1	0.653919	12.0338	12.0934	11.7862	11.8165	11.5525	11.7778	12.006	11.7507	12.1695	12.1131	11.155	10.8036	10.6328	11.193	10.8297	9.24107	9.38179	9.24184	9.00249	9.41568
Q3UPL0	5	Sec31a	2.54819e-10	8.54535	8.50942	8.59542	8.52758	8.37485	8.50361	8.67473	8.82185	8.78765	8.83277	8.6888	8.65027	8.6921	8.63085	8.59342	8.54904	8.71225	8.48933	8.77076	8.79496
Q3URD3	5	Slmap	0.141409	5.25702	5.78651	5.84586	5.3196	5.34637	6.0935	6.08769	5.96535	6.11949	6.13081	6.23098	6.08088	6.49529	6.20742	6.50123	6.28778	6.3937	6.25861	6.3485	6.51059
Q3UTJ2	2	Sorbs2	0.448504	7.89862	8.10413	8.27476	8.29643	8.37291	8.89543	8.77444	9.05611	8.92769	9.14173	9.42828	9.59994	9.37401	9.60965	9.39205	8.39372	8.83596	8.70567	8.7389	8.80663
Q3UTQ8	5	Cdkl5	5.82918e-08	4.10844	4.69855	5.27702	4.13125	4.71883	5.07419	4.72351	4.9216	5.23246	5.43052	5.40249	5.94259	6.08364	5.56604	5.7502	4.99348	5.66104	5.75741	5.76174	5.88689
Q3UTZ3	5	NA	0.00054337	4.9028	4.91807	4.79698	4.25877	4.88181	5.33606	5.20769	4.88414	5.30843	5.31922	5.28453	5.09129	5.15383	5.45436	5.30349	5.06039	5.16639	4.97632	5.25222	4.97819
Q3UU96	8	Cdc42bpa	0.00418588	8.38393	8.38166	8.54277	8.27853	8.38356	9.05899	9.24288	9.35988	9.2219	9.18988	8.79869	8.80504	8.94319	8.97555	8.80838	8.24898	8.31942	7.98565	8.27024	8.32976
Q3UUG6	5	Tbc1d24	7.65323e-09	7.43788	7.3649	7.84249	7.63438	7.50504	7.85276	7.86915	7.92384	8.01177	7.79714	8.03603	7.67847	7.95727	7.91637	8.05611	8.2144	8.34559	8.14313	8.25583	8.26786
Q3UV17	7	Krt76	1.23619e-05	10.8146	9.09191	9.3829	11.7457	9.82204	8.56859	8.77124	8.75266	7.20945	8.03826	8.02317	8.17854	8.8152	8.29726	7.61645	9.49952	9.58149	9.03943	8.3999	10.9064
Q3UVC0	5	Ksr2	0.00429863	4.96966	4.90716	5.27067	4.73224	4.9452	5.70032	5.59378	5.84364	5.97144	5.83909	5.74588	5.72928	6.02331	5.95879	6.12804	5.73931	5.87234	6.01831	5.77869	5.90397
Q3UVL4	5	Vps51	4.74795e-07	5.38232	5.64174	5.81417	4.81728	5.07906	6.17522	6.08306	6.32335	6.5997	6.56495	6.27732	6.18359	6.34106	6.62452	6.45849	6.04575	6.46634	6.21271	6.57288	6.46351
Q3UVR3	3	Ttbk2	5.14821e-05	4.36771	4.69742	4.87933	5.09984	5.28571	4.62421	4.56297	4.51159	4.64197	4.92051	4.18047	4.45486	4.38374	4.16267	4.18763	4.12572	4.42742	4.24265	3.60748	3.87814
Q3UVX5	4	Grm5	0.000993567	8.92134	9.03611	8.87484	8.82122	8.40612	9.16795	9.35205	9.2591	9.4051	9.37767	8.74106	8.39233	9.14184	8.75984	8.65585	8.40764	8.47365	8.46445	8.42125	8.57893
Q3UYC0	5	Ppm1h	5.69117e-05	5.28054	5.70169	5.89727	5.993	6.29434	6.80513	6.50425	6.73197	6.78992	6.75813	7.15153	7.40921	6.95393	7.15045	7.13389	6.95088	7.37219	7.09561	7.3523	7.3603
Q3V038	8	Ttc9	6.51489e-07	6.11172	5.89823	6.17742	6.38173	5.78704	6.5749	6.55183	6.41193	6.66104	6.49588	6.43418	5.72089	6.23371	6.19322	6.16191	6.0231	6.0973	5.9232	5.92232	5.87006
Q3V0G7	4	Garnl3	0.00152337	7.00832	7.29751	7.24106	6.96216	6.87178	7.27386	7.49907	7.45999	7.57125	7.63788	6.64754	6.70693	6.77698	6.926	6.57216	6.09784	6.2362	6.22203	5.96556	6.33843
Q3V1U8	6	Elmod1	2.22047e-08	5.99631	5.43856	5.97704	6.21541	6.0195	6.14017	6.54125	6.53095	6.37818	6.23258	6.29926	5.41285	6.46217	6.37103	6.67454	7.31413	7.14672	6.81605	7.22671	7.35187
Q3V3V9	5	Carmil2	0.00016354	5.88305	5.54028	5.89992	5.7407	5.65729	6.2486	6.18831	6.20454	6.66569	6.52816	6.35826	6.39371	6.69243	6.79779	6.64586	6.72012	6.92524	6.78504	7.26088	7.1512
Q4ACU6	5	Shank3	1.49255e-06	3.33107	2.82942	4.96401	3.2946	3.41433	5.59998	5.28818	5.79974	5.81309	6.0215	6.27439	6.76612	7.13343	6.60916	6.68788	6.92181	7.23032	7.19616	7.383	7.50124
Q4JIM5	2	Abl2	0.994537	6.70598	7.07371	7.15998	7.12507	7.47168	7.31735	7.42585	7.58483	7.61245	7.70087	7.2298	7.69063	7.33698	7.4668	7.30715	6.88798	7.08628	7.03241	7.07476	7.09371
Q4KMM3	5	Oxr1	4.65884e-08	6.82232	7.23164	7.97602	7.70151	7.78792	9.18658	9.23239	9.95173	9.43894	9.4722	10.3853	10.608	10.5675	10.8362	10.8664	11.207	11.4488	11.3101	11.8667	11.6763
Q4KUS2	5	Unc13a	0.00233897	7.59253	7.91532	8.33554	8.11126	8.09509	8.98651	9.18992	9.62586	9.43366	9.35232	9.67195	9.29836	9.48255	9.93308	9.71521	9.8813	10.0981	9.80212	10.1772	9.99269
Q4U2R1	3	Herc2	6.90959e-10	5.41014	5.52447	5.24294	4.81855	5.07164	5.2095	4.90806	4.87009	5.01011	5.16205	5.15185	4.86638	4.90458	4.70146	4.48648	4.00004	4.59281	4.40922	4.20646	4.30397
Q4VA53	3	Pds5b	2.11604e-08	4.70466	5.16407	4.74117	5.3541	5.1746	3.40813	3.25276	3.12867	3.84936	4.35256	3.45624	4.2957	3.41785	3.79737	3.24526	3.69689	4.3885	4.02234	3.82602	3.29033
Q4VAA2	3	Cdv3	0.000129222	7.92384	8.1487	7.81945	7.84312	8.25795	7.85228	7.78974	7.52454	8.09897	8.12469	7.45415	7.8177	7.26888	7.40224	7.06984	6.93585	7.49901	7.27998	6.74411	7.2593
Q4VAE3	6	Tmem65	0.000199386	2.70398	2.88346	3.31557	3.90434	3.48698	4.0343	3.69199	3.63513	3.68699	3.47403	4.13412	3.7416	4.20005	4.04853	4.30438	4.59385	4.30696	4.12711	4.95143	4.80031
Q501J6	3	Ddx17	0.000341495	8.89122	8.52752	8.88852	9.25427	8.96133	7.65577	7.47366	6.94068	7.32594	7.39561	6.97032	6.62116	7.16791	6.80545	7.1114	6.77755	6.19271	6.48084	6.86207	6.88729
Q505F5	3	Lrrc47	0.000163794	7.8757	7.96129	7.89726	7.97515	7.99825	7.60784	7.26469	7.02748	7.45832	7.66069	7.13067	7.17379	7.11233	6.92191	7.01617	6.9089	6.96129	6.73855	6.80651	6.9198
Q50L42	4	Pla2g4e	1.49122e-08	6.13611	6.17858	5.92429	5.6255	5.71882	6.2182	6.36643	5.96571	6.718	6.6272	5.74297	5.55359	5.64021	5.84958	5.57512	4.60374	4.82045	4.36557	4.13126	4.64526
Q52KF3	6	Spire1	1.38222e-07	3.90899	4.27416	4.50777	4.0058	4.48532	4.12495	3.69775	3.65119	4.35618	4.71647	4.26213	4.68843	4.02217	4.2358	4.17453	4.5216	4.44024	4.95557	4.5568	4.57568
Q52KI8	3	Srrm1	9.77392e-08	5.54772	5.60031	5.84058	6.66011	6.06624	3.72264	3.7456	3.62942	4.46584	4.45882	3.77361	4.5087	3.44276	4.13292	4.14671	3.87536	3.90157	4.38549	3.11435	3.33224
Q571K4	3	Tab3	0.115144	7.60154	7.71048	6.88891	7.28276	7.35668	6.9205	6.78059	6.36864	6.96772	6.95307	6.56684	6.8894	6.23064	6.22854	6.19137	6.22554	6.62349	6.42884	6.32638	6.32395
Q5BLK4	3	Tut7	0.000121619	5.4518	4.90782	5.47585	5.48142	5.44508	4.6953	4.79182	4.24099	5.16645	5.18936	3.85675	4.65083	4.26526	4.21064	4.1794	3.14495	3.81683	3.35273	3.81618	4.01456
Q5DTN8	5	Jakmip3	0.590501	4.74588	4.95608	4.19901	4.18371	4.84435	5.32441	5.01935	5.26332	5.18851	4.56207	5.70236	5.37293	5.88051	5.60755	5.76656	5.68041	5.76518	5.55068	6.13826	5.78722
Q5DTX6	5	Jcad	5.63471e-06	3.30675	4.18138	5.30256	4.91871	5.49565	6.23985	6.0146	6.78462	6.02365	6.0149	7.3313	7.58569	7.97232	7.43314	7.66356	7.6741	7.79464	7.41743	7.65501	7.57534
Q5DTY9	5	Kctd16	2.67038e-05	4.16423	5.02092	6.18974	4.83553	5.6016	7.49553	7.48598	7.80149	7.9682	8.01009	8.32973	8.466	8.34448	8.73924	8.60346	8.25632	8.44735	8.45722	8.48479	8.47503
Q5DU14	3	Myo16	4.46768e-07	5.22215	5.59314	5.88246	6.0082	6.43383	5.41584	5.11839	4.79706	5.9537	6.04457	4.67936	5.59919	4.10471	4.70824	4.79158	4.01757	4.73158	4.60122	3.87728	4.15607
Q5DU25	5	Iqsec2	1.76229e-08	7.06304	6.96391	7.29262	6.97359	7.07649	7.9428	7.89171	8.29114	8.22036	8.25821	8.10299	8.27779	8.6036	8.53386	8.54166	8.25855	8.44323	8.28288	8.48398	8.54162
Q5F2E8	2	Taok1	0.000693812	7.00698	6.98592	6.69331	6.53505	6.17552	7.03796	6.87911	6.89715	7.16764	7.07474	6.89763	7.12615	7.03996	7.14665	6.95041	6.36594	6.6609	6.62103	6.95246	6.88585
Q5FWK3	6	Arhgap1	1.80193e-08	6.73558	6.57607	6.77102	6.72131	6.38074	6.63939	6.78204	7.01303	6.7099	6.87292	6.90501	6.77706	6.78941	6.97752	6.97795	7.43856	7.39963	7.03053	7.47595	7.50573
Q5GH67	2	Xkr4	0.0389212	5.74626	6.73776	6.61365	5.87139	5.88516	7.26679	6.74778	6.90713	7.32449	7.24277	7.32652	7.47477	7.11786	7.57524	7.25627	6.11229	6.59805	6.57405	6.68582	6.67394
Q5H8C4	5	Vps13a	1.87824e-05	4.71748	4.36769	4.66425	4.36965	4.65105	5.16309	5.27846	5.42042	5.76405	5.54189	5.79343	6.37196	6.24431	6.28369	6.39232	6.17258	6.49203	6.20293	6.71723	6.71015
Q5HZI2	6	C2cd4c	0.000100278	4.17115	4.34247	4.65683	4.28616	5.26851	4.44378	4.23685	3.95486	4.71182	4.82412	4.4358	5.17722	4.7098	4.54613	4.46251	4.70646	4.95765	5.3213	5.13981	5.37539
Q5M8N0	1	Cnrip1	1.92226e-08	7.9013	8.05782	8.36817	8.00054	7.68429	8.41766	8.5022	8.31397	8.45745	8.68752	8.52865	8.17878	8.7528	8.89915	8.67657	8.8088	8.81222	8.64767	9.07021	8.96406
Q5PR69	4	Crad	0.0468661	8.25263	8.23334	8.01612	7.89262	7.68827	7.96814	7.84613	7.56381	8.30983	8.16841	6.76172	6.48574	6.29855	6.7795	6.21218	4.82627	5.11276	5.08119	4.19708	4.74579
Q5QNQ6	5	Osbp2	0.00015475	5.08755	4.79421	5.91136	5.58217	6.11728	6.65257	6.38727	6.58865	6.60318	6.85685	7.08626	7.49754	7.22505	7.26557	7.20068	7.43251	7.48584	7.57249	7.27081	7.30202
Q5RJI5	2	Brsk1	4.19431e-07	7.76573	7.80206	7.87967	7.77668	7.86166	8.20287	8.07134	8.2331	8.42233	8.44229	8.12367	8.56976	8.27548	8.2518	8.45532	7.79839	8.15977	8.13383	8.10204	8.12209
Q5RKR3	3	Islr2	0.751471	8.61235	8.82092	8.63478	8.98281	9.21083	7.67837	7.50714	7.22437	7.6677	7.90133	7.20639	7.3837	6.62548	6.79672	6.72127	6.3829	6.82106	6.52263	5.93953	6.15334
Q5SNZ0	4	Ccdc88a	0.000191253	9.97377	10.0712	9.83977	9.71121	9.77835	10.1187	10.032	9.65055	10.1011	10.1574	9.29997	9.02275	8.95528	9.07368	8.75862	7.9871	8.40432	8.1013	7.79553	8.0924
Q5SP85	5	Ccdc85a	2.76533e-08	6.87968	6.88033	7.41869	6.87788	7.42234	8.03655	7.92567	7.89749	8.38366	8.37725	8.25471	8.73723	8.05805	8.4423	8.35292	7.88607	8.13463	8.03928	8.06844	8.03563
Q5SQX6	1	Cyfip2	2.55346e-09	7.41798	7.75875	7.77001	7.15449	7.24024	8.37921	8.72214	9.2817	8.89857	8.50677	8.38514	8.10298	8.78182	8.85945	8.84574	8.55084	8.51124	8.27331	9.09277	8.79674
Q5SRX1	5	Tom1l2	3.02794e-06	6.40599	6.38414	6.65859	6.51669	6.44574	7.12236	6.88008	7.36818	7.59926	7.73601	7.47116	7.80102	7.66444	7.71777	7.52149	7.35017	7.65813	7.34225	7.77862	7.8939
Q5SSH7	2	Zzef1	5.33563e-05	7.96337	8.26741	7.91564	7.94623	7.82797	8.39289	8.38599	8.57816	8.66554	8.59312	8.42281	8.68026	8.54753	8.63911	8.54982	7.76745	8.1515	7.94662	8.06204	8.05851
Q5SSL4	5	Abr	4.35977e-06	8.24091	8.23952	8.58131	8.24365	8.15715	9.14131	9.22054	9.3451	9.46473	9.4528	9.47419	9.43397	9.53413	9.60291	9.56055	9.33486	9.5131	9.23884	9.461	9.39017
Q5SSM3	5	Arhgap44	4.13742e-06	5.9755	6.51145	6.95739	6.72146	6.89432	8.36382	8.27905	8.70898	8.54521	8.57714	8.93452	9.04445	8.88126	9.09316	8.9658	8.8411	9.16053	8.94645	8.97874	9.01518
Q5SUE8	5	Ankrd40	3.39596e-09	3.48124	3.47422	3.46012	3.78186	3.55798	4.95843	5.05065	5.63415	5.30635	5.24476	5.45108	5.27182	5.9938	5.87096	6.00707	5.65603	5.40974	5.20394	5.82095	5.71762
Q5SUR0	3	Pfas	1.21377e-09	5.12099	4.65944	4.62738	5.1303	4.90754	4.25596	3.80346	3.84122	4.30266	4.30921	3.79482	4.40768	4.4369	4.00388	3.80683	4.05607	4.06639	3.83779	3.89531	4.48552
Q5SV85	3	Synrg	1.31514e-08	7.34706	7.00277	7.01625	7.38794	7.24075	6.75563	6.95489	7.11702	6.95012	6.97419	6.72962	6.7655	6.71981	6.62094	6.85223	6.75933	6.93148	6.75884	6.83001	6.88652
Q5SVL6	5	Rap1gap2	0.000513611	5.94978	6.80511	7.03258	6.96869	6.60481	7.73475	7.61001	7.87179	7.87164	7.84405	8.13095	8.26534	8.1005	8.22197	8.38626	8.33296	8.69577	8.28672	8.39653	8.42159
Q5SW19	2	Cluh	0.000269535	3.71724	3.60613	3.57005	4.30748	2.40392	4.03628	3.97157	3.87685	4.05348	4.27961	4.05349	4.48574	4.1868	4.12355	4.11161	3.12219	3.75233	3.54332	3.92205	3.7486
Q5SW75	4	Ssh2	1.18348e-07	7.32841	7.38296	7.16263	7.06254	7.09841	7.37129	7.18128	7.10809	7.45874	7.48499	6.84815	7.02736	6.60352	6.8071	6.56725	5.34143	5.74155	5.85191	5.57069	5.79247
Q5SWP3	4	Nacad	0.05086	6.4944	6.67745	6.0461	5.91612	5.98399	5.95283	5.91626	5.76738	6.05431	6.06743	5.15464	5.24028	6.0672	5.81262	5.49503	4.13031	4.30582	4.3587	4.69983	4.73148
Q5SXA9	4	Wwc1	5.39539e-09	7.47853	7.61003	7.46158	7.2582	7.27524	7.72798	7.92323	7.87874	8.2308	8.04118	7.20213	6.74323	6.94487	7.28804	7.06603	6.22286	6.34051	6.00862	6.11159	5.97388
Q5U3K5	6	Rabl6	9.07289e-07	6.66744	6.93818	6.91068	7.06788	6.91589	6.80108	6.42923	6.77991	7.10314	7.01945	7.3642	8.24084	7.80061	7.83525	7.9782	7.4698	7.8712	8.0691	8.18794	7.93819
Q5U430	2	Ubr3	4.96568e-09	4.57428	4.79014	4.78714	4.79115	3.44153	5.07	4.89928	4.86135	5.61178	5.27302	5.04666	5.05909	5.0623	4.94002	5.0471	4.27871	4.60495	4.20705	4.60835	4.51244
Q5U458	6	Dnajc11	5.77461e-06	5.01264	5.22334	5.46968	5.3389	5.14121	5.22329	5.26616	5.20514	5.34924	5.43706	5.62521	5.39773	5.85815	5.73297	5.8736	6.23165	5.95215	6.31322	6.20445	6.29154
Q5XG73	3	Acbd5	0.0100875	5.0332	4.79291	4.98933	4.4734	4.4713	4.82674	4.40724	3.64813	5.09132	5.04303	4.28424	4.24745	4.24089	4.3544	4.125	3.14445	3.31047	4.23339	3.18167	3.77954
Q5XJY5	3	Arcn1	4.75104e-07	5.39571	5.14045	5.6393	5.66659	5.70163	4.8055	5.19082	4.87003	4.68485	4.84165	4.95555	4.36155	4.42951	4.27183	4.66715	4.91738	4.14336	4.32217	4.32364	4.61724
Q60575	3	Kif1b	5.34289e-05	6.44602	6.46819	6.08289	6.54397	6.03755	6.22433	5.86868	5.84433	6.31989	6.45916	6.10544	6.4522	5.81941	5.95744	5.97123	5.59274	6.07104	5.88736	5.6524	5.77079
Q60597	6	Ogdh	0.329942	7.24257	7.40758	7.99276	8.06749	7.84006	7.47603	7.49041	7.35633	7.37759	7.62115	8.06029	8.12566	8.12671	8.01023	8.32117	8.67444	8.47109	8.7377	8.91115	8.82746
Q60598	8	Cttn	0.0277132	11.0458	10.7947	10.7514	10.718	10.833	11.2561	11.5205	11.5303	11.5048	11.5056	11.1841	10.7861	11.1836	11.2003	10.9633	10.8889	11.1204	10.6616	11.0378	10.9301
Q60605	3	Myl6	1.47881e-06	5.99098	5.49435	6.07516	6.02171	6.50299	5.72132	5.6899	5.55708	5.50656	5.87024	5.7738	6.39148	5.90748	5.71851	5.53978	5.56532	5.66445	5.50267	5.35147	5.43095
Q60610	2	Tiam1	6.99501e-05	3.25468	2.61121	3.96104	3.83751	4.00435	5.03341	4.11161	4.38358	4.72381	4.8673	4.64576	4.91024	4.58964	4.47317	4.29394	3.65946	4.31093	3.91787	3.56393	4.10117
Q60631	4	Grb2	0.036938	6.8568	6.77999	6.89226	6.51398	6.84552	6.59993	6.76768	6.56003	6.83268	6.81832	6.24613	6.51705	6.62434	6.4628	6.45473	6.30315	6.38842	6.26661	6.11977	6.19394
Q60634	8	Flot2	0.00158215	8.80103	8.6212	8.9372	8.53206	8.49217	9.30672	9.51165	9.38845	9.41636	9.31967	8.86332	8.26801	8.6266	8.73117	8.92747	8.74955	8.51733	8.22275	8.75421	8.90158
Q60668	3	Hnrnpd	6.28447e-05	9.82878	9.47146	9.50305	10.0621	9.5752	8.70695	8.61263	8.00849	8.41476	8.56163	8.20592	7.58661	8.33102	8.16737	8.26147	7.98452	7.33212	7.66149	8.14317	8.13219
Q60676	5	Ppp5c	0.000130798	6.2384	6.23719	6.73056	6.36933	6.63194	7.11489	7.00108	7.23284	7.1031	7.16738	7.50724	7.5674	7.5551	7.50025	7.69918	7.84865	7.81991	7.70804	7.90432	7.82419
Q60692	3	Psmb6	6.23232e-07	7.87584	7.96432	7.73706	8.28139	8.17942	7.07172	6.66989	6.08439	6.68059	6.7194	6.59524	6.46503	6.27445	6.15342	6.48646	6.38726	5.86061	6.3363	6.15513	6.17284
Q60737	3	Csnk2a1	2.89174e-09	6.45642	5.84482	6.3148	6.51027	6.1781	5.88124	5.93535	6.0195	5.46034	5.46991	5.51408	5.09591	5.79633	5.52263	5.91886	6.31644	5.52227	5.27821	5.87826	5.76789
Q60749	3	Khdrbs1	7.88421e-08	9.23991	9.16614	8.78331	9.6103	9.28193	7.41907	7.24908	7.00492	7.42018	7.67162	6.84888	7.30854	7.33319	7.19769	7.14909	6.65809	6.81904	7.3997	6.94227	7.11284
Q60760	4	Grb10	0.0221072	4.63111	4.66766	4.24339	4.3562	4.83983	4.7332	4.22865	4.31979	4.1938	3.86258	3.77705	3.53084	4.26006	3.55348	3.76849	3.04864	3.30278	3.1615	3.68974	3.10302
Q60780	5	Gas7	9.33913e-09	6.66391	6.66321	6.29178	5.65315	6.31907	6.74405	6.4341	6.48214	6.57524	6.67721	6.63297	7.08412	7.47469	7.20862	7.06963	6.41731	6.70661	6.48002	6.37935	6.52977
Q60803	2	Traf3	2.00772e-05	5.00403	5.89972	5.81196	5.5417	5.54072	6.26945	6.24695	6.56819	6.65637	6.6069	6.70086	6.88185	6.81208	6.9283	6.93053	5.84394	6.07112	5.91196	5.94019	6.06416
Q60829	5	Ppp1r1b	0.00328379	4.81421	4.24938	4.67364	5.35841	5.72561	6.41943	5.85255	6.25411	5.89222	5.82263	7.37391	8.63492	7.64347	7.11539	6.22197	6.81618	7.13794	7.29868	5.87888	5.66034
Q60854	1	Serpinb6	8.56345e-07	5.59198	5.35651	5.60859	4.9745	4.83923	5.90424	6.29553	6.61597	6.18428	6.14676	5.87741	5.05574	5.93592	6.25335	6.1917	6.21963	5.60684	5.7095	5.99642	5.83779
Q60864	6	Stip1	0.000369828	8.78328	8.82266	9.01227	8.80538	8.72866	8.90871	8.77806	8.86933	9.0017	9.10537	9.20865	9.36455	9.40635	9.30929	9.27553	9.43736	9.61585	9.50476	9.62752	9.52285
Q60865	4	Caprin1	0.005616	9.70819	9.38421	9.34349	9.52652	9.37915	9.18336	9.12793	8.71831	9.01824	9.13023	8.49585	8.21983	8.69722	8.35585	8.15325	7.92021	8.00046	7.60076	7.7525	7.91398
Q60875	5	Arhgef2	1.07606e-08	6.9916	6.83601	7.40609	7.22583	6.99051	7.80319	7.75681	8.26431	7.96058	7.94868	8.15371	8.42843	8.74515	8.60774	8.74277	7.96768	8.09131	7.97128	8.3403	8.17122
Q60900	3	Elavl3	0.164082	5.17108	5.61445	5.38722	5.74256	5.18165	4.64625	4.11744	3.59628	3.70977	3.93377	3.47459	2.16606	3.40325	3.24187	3.51386	3.71217	2.84971	3.04096	3.21783	3.15062
Q60902	1	Eps15l1	3.55471e-07	7.77799	7.74904	7.68829	7.37162	7.42843	7.71186	8.21982	8.77752	8.3694	7.98754	7.83037	8.28334	8.50047	8.32578	8.47125	8.45169	8.69173	8.09902	8.68113	8.50501
Q60930	5	Vdac2	1.13581e-06	7.42628	7.64222	8.07065	7.95315	7.69949	8.73523	8.98494	9.31458	8.87063	8.818	9.37385	8.71747	9.52799	9.49217	9.70392	10.0697	9.69532	9.65746	10.3748	10.131
Q60931	1	Vdac3	0.00156662	7.55624	7.20177	7.73715	7.40758	6.45756	8.20052	8.89358	9.25458	8.61644	8.32833	8.27686	7.00136	8.86195	8.73516	8.84752	9.14773	8.64639	8.55591	9.34712	9.08301
Q60932	6	Vdac1	1.30091e-07	8.25781	8.42068	8.77043	8.84072	8.52395	8.96114	8.93988	8.85176	8.77327	8.83216	9.61012	8.88316	9.75317	9.42952	10.0778	10.5063	9.97773	10.2854	10.8222	10.6766
Q61016	6	Gng7	0.00126619	6.15265	6.33751	6.70168	6.47408	6.86939	6.7396	6.54361	6.34505	6.86952	6.83396	7.20651	7.90392	7.64092	7.72357	7.51027	7.56918	7.88725	8.44012	8.12489	8.01411
Q61024	3	Asns	6.19757e-07	8.05454	7.90325	7.97252	7.81276	7.90339	7.10747	6.86592	6.68739	7.12658	7.30916	6.55632	6.97032	7.13049	6.44923	6.58511	6.36595	6.5905	7.12424	6.49361	6.55726
Q61029	3	Tmpo	9.43279e-07	8.9919	8.99108	8.48025	8.85119	8.76063	7.32396	7.0515	6.13967	6.99751	6.93989	6.31019	5.83991	5.70287	5.70485	5.87172	5.31634	5.47988	5.6893	5.67517	5.83721
Q61035	3	Hars1	2.78479e-06	5.62249	5.76329	5.99086	6.19381	5.63134	5.25878	5.4885	5.03962	5.20036	5.44739	5.06041	4.78085	4.81885	4.63133	4.99747	4.89811	4.48418	4.47844	4.60894	4.39969
Q61037	5	Tsc2	6.73389e-07	7.27504	7.27532	6.92362	7.1202	7.16053	7.35249	7.41102	7.50438	7.45067	7.32289	7.3013	7.37017	7.26637	7.38108	7.14699	7.41459	7.48297	7.21187	7.39514	7.31168
Q61081	1	Cdc37	0.126629	7.36646	6.8629	7.29073	6.88967	7.13375	7.39341	7.80961	8.01282	7.40348	7.75227	7.45532	7.45483	7.57161	7.6066	7.71535	7.69434	7.80458	7.45419	7.81171	7.80239
Q61097	2	Ksr1	0.0108759	2.81884	2.86653	3.64062	3.13545	3.2022	3.57174	3.32794	3.24658	3.74257	3.73681	3.55531	3.78845	3.5086	3.49769	3.66431	2.90571	3.20897	3.61025	3.05872	3.37825
Q61120	4	Shc3	0.00105086	6.15137	6.12506	6.22604	6.08764	6.16389	5.93472	5.9816	6.02191	6.26402	6.21149	6.11981	6.32778	6.03474	5.83279	6.03537	5.72556	5.84257	5.49134	5.65862	5.70775
Q61136	3	Prpf4b	0.0295942	7.31787	7.31708	7.23462	7.44698	7.32125	6.45024	6.77393	6.70961	6.6963	6.52692	6.27206	6.04013	6.68279	6.74542	6.60192	6.53338	6.47609	6.19668	6.47054	6.46624
Q61140	4	Bcar1	0.000317779	7.54172	7.30872	7.46463	7.10352	7.20684	7.68508	8.0831	7.87118	8.02882	7.8954	7.36695	6.43238	7.15229	7.33953	6.9582	6.88516	7.21386	6.81737	6.72209	6.9467
Q61165	5	Slc9a1	5.01622e-06	1.73003	2.90325	4.08933	4.09873	3.03423	4.91102	4.64922	4.61066	4.70585	4.61637	5.58097	6.00097	5.80405	5.4062	5.97019	6.33664	6.37087	6.55289	6.55322	6.14982
Q61166	4	Mapre1	7.11969e-05	8.62847	7.8368	8.3741	8.16987	8.05248	8.12606	8.57206	8.66242	8.31269	8.40603	7.93134	7.67358	7.95908	7.90398	7.9423	7.3245	7.21112	7.00069	6.91836	7.0663
Q61171	4	Prdx2	7.24579e-07	8.94229	9.22439	9.33279	9.50158	9.1647	8.97232	9.10969	9.01311	9.40297	9.56177	9.4808	9.56563	9.21471	9.39697	9.10961	8.7041	8.87199	8.92183	8.73743	8.65943
Q61187	8	Tsg101	6.51588e-07	8.47883	8.49233	8.20909	8.28456	8.0477	8.81254	8.97783	9.07389	9.04537	8.95491	8.86662	8.41212	8.53367	8.90838	8.5808	8.05256	8.41461	8.14891	8.18091	8.17677
Q61191	3	Hcfc1	0.00237264	4.92558	5.36183	5.08701	5.01145	5.06231	4.52408	4.43451	4.07809	4.44008	4.63704	4.08303	3.74439	4.29726	4.42412	4.29532	3.95885	4.331	4.44198	4.15768	4.09053
Q61205	3	Pafah1b3	1.16921e-05	6.97678	7.0972	6.25365	6.90659	6.26964	5.61436	5.27021	4.38031	5.09795	5.26619	4.2311	3.34813	3.56721	3.67802	3.07861	3.02833	3.03266	2.57725	2.83297	3.08824
Q61234	6	Snta1	2.10531e-05	4.01001	3.39921	4.316	3.39478	3.81839	4.41749	3.82888	3.83424	4.14229	4.55321	4.44678	4.65407	4.94109	4.62034	4.81886	5.0791	4.84053	5.01107	5.34162	5.44587
Q61249	4	Igbp1	4.72312e-09	5.73062	5.79945	5.42815	5.30593	5.71697	5.61696	5.7206	5.62722	5.9716	5.82308	5.06298	4.80166	5.37391	5.2861	5.363	5.20708	5.36675	5.0626	5.30087	5.18109
Q61290	5	Cacna1e	2.85591e-05	6.78469	6.97584	7.05304	7.18399	6.99947	7.25083	7.10908	7.27335	7.6469	7.39566	7.64196	7.91301	8.04299	7.92413	7.84534	7.63588	8.06794	8.10314	8.07188	7.87301
Q61301	4	Ctnna2	0.000526812	9.48151	9.31152	9.25182	9.21076	9.10061	9.25032	9.60453	9.75233	9.67427	9.58069	9.21717	9.03516	9.09347	9.51172	9.16392	8.92654	8.86151	8.73885	8.92053	8.89497
Q61315	4	Apc	1.27209e-06	10.5199	10.5511	10.2913	10.5122	10.5631	10.6146	10.6655	10.87	10.9228	10.9305	10.6308	10.6672	10.3921	10.6698	10.4713	9.49926	9.73994	9.61506	9.56086	9.57273
Q61316	5	Hspa4	5.58032e-05	9.91277	9.98639	10.1848	10.0129	9.98917	10.2087	10.3158	10.4555	10.2655	10.402	10.3993	10.3309	10.4028	10.4352	10.541	10.4708	10.4082	10.2834	10.5453	10.5458
Q61335	6	Bcap31	4.77392e-09	7.76557	7.781	7.77545	7.71254	7.60116	7.72376	7.36404	7.40085	8.00366	7.61443	7.79799	7.95533	7.98737	8.13933	8.11222	8.05578	8.23579	8.33728	8.32091	8.23838
Q61361	5	Bcan	2.03349e-05	4.60897	3.58409	6.07961	5.20099	5.78635	6.49788	5.89729	6.32923	5.91831	6.46782	7.40846	7.18413	7.38962	7.02777	7.72557	8.15212	7.77873	8.22193	8.20305	8.34619
Q61411	5	Hras	0.000129544	6.47745	6.90316	7.14167	7.13101	7.12394	7.60895	7.79011	7.90267	7.62952	7.69406	8.10127	7.74853	8.14755	8.18362	8.25078	8.58064	8.49214	8.46308	8.78756	8.75821
Q61464	3	Znf638	2.22377e-06	5.10879	4.49022	5.32977	5.80922	5.4114	4.50779	4.67287	4.31853	4.63913	4.46569	4.27602	4.60622	4.59485	4.52286	4.3306	3.97744	4.46426	4.57287	4.20601	4.09509
Q61481	5	Pde1a	3.73671e-08	4.63197	5.20724	5.91387	5.1942	5.98574	6.47968	6.33446	7.13691	6.58598	6.71032	8.1238	8.4578	8.23394	8.37124	8.68251	9.05741	9.15704	8.9408	9.25539	9.1786
Q61490	5	Alcam	0.000730243	6.83018	6.97651	6.96889	6.9568	6.75964	7.48562	7.5499	7.74549	7.42646	7.12438	7.55901	7.046	7.81147	7.81995	7.846	7.75292	7.69261	7.73651	8.32685	8.12927
Q61543	3	Glg1	1.4077e-09	4.81907	4.46743	4.95714	5.19238	4.96689	3.82202	3.89562	3.39179	3.85092	3.93485	4.09035	3.30755	3.36649	3.47402	3.85364	3.62817	3.12091	3.41886	3.53962	2.85261
Q61545	3	Ewsr1	0.000139572	8.11292	7.81149	7.75443	8.33869	7.95762	6.55396	6.86248	6.74444	7.14784	6.93077	6.30672	6.74094	7.20694	7.08532	6.84638	6.47788	6.87806	6.714	6.62836	6.80793
Q61548	5	Snap91	3.81548e-06	6.97876	6.80803	8.14097	7.81413	7.73644	8.58083	8.29519	8.26614	8.48342	8.5166	8.72493	9.20687	8.57738	8.56871	8.82654	8.86074	8.96301	8.85152	8.79143	8.78354
Q61553	1	Fscn1	2.92792e-06	9.78039	9.70381	10.0007	9.98188	9.9961	10.0844	10.12	10.1435	10.0499	10.1694	9.93363	9.73566	10.0714	10.0656	10.1535	10.162	10.0474	9.99056	10.0796	10.0702
Q61584	3	Fxr1	3.83343e-05	7.05368	6.86422	6.87021	7.00925	6.91039	6.25326	5.92072	6.05737	6.34026	6.27889	5.9841	6.51978	6.84759	6.269	6.41979	6.09202	6.39789	6.53734	6.4791	6.5107
Q61595	3	Ktn1	0.043166	5.10708	5.40746	5.4792	5.45682	5.45304	4.57267	4.78892	5.08212	4.78453	5.13156	5.25342	4.89605	5.52595	4.95534	5.36123	4.92994	4.97203	4.2046	4.61498	4.96364
Q61598	4	Gdi2	0.000312239	9.04302	9.17144	9.23212	9.29213	9.18196	9.15982	9.24731	9.25346	9.30501	9.39473	9.31947	9.17884	9.01982	9.11581	9.10679	8.6979	8.93603	8.8538	8.80774	8.93443
Q61644	5	Pacsin1	0.00512004	5.90324	6.99131	8.24939	7.86997	7.39442	9.85575	9.87164	10.673	10.1021	10.1513	11.383	11.5548	11.4446	11.6868	11.7	12.227	12.4127	12.1994	12.5127	12.4029
Q61656	3	Ddx5	2.89174e-09	9.97329	9.69018	9.93299	10.4842	10.1691	8.64106	8.4209	7.88765	8.30768	8.49252	7.88892	7.96477	8.11744	7.83168	8.19161	7.8545	7.25244	7.77407	7.9836	8.03373
Q61696	6	Hspa1a	0.772994	5.36653	5.60617	5.34927	5.22757	4.70585	4.64087	5.12683	4.80262	5.07557	5.33844	4.60027	5.00323	4.903	5.05995	5.05285	5.12912	5.62108	5.39895	5.17503	5.5647
Q61699	2	Hsph1	1.52098e-08	9.32173	9.84693	9.93637	9.34267	9.40062	10.1312	10.2043	10.2111	10.1547	10.3258	10.0682	10.037	10.032	10.1692	10.134	9.61727	9.57999	9.67603	9.72786	9.72993
Q61735	6	Cd47	0.0536033	6.98165	7.45671	7.54886	7.07571	7.15139	7.5017	7.41244	7.75007	8.02233	7.92944	7.97329	8.55736	8.36778	8.56265	8.49788	8.68446	8.87635	8.93064	9.27178	9.08913
Q61753	7	Phgdh	3.24301e-05	9.27784	8.55614	9.51122	9.20407	9.08474	8.26595	8.16266	7.94951	7.98193	8.28891	8.30424	8.15734	8.08256	8.24872	8.41799	8.97654	8.48362	8.6738	8.71714	8.65974
Q61768	4	Kif5b	1.67127e-07	9.61914	9.55703	9.30239	9.42392	9.55732	9.32304	9.26626	9.17827	9.45169	9.49372	9.01719	8.92368	9.00757	8.90784	8.82469	8.59683	8.58401	8.64416	8.5405	8.5023
Q61771	3	Kif3b	1.87592e-05	7.94653	7.98114	7.8515	7.96396	8.24017	7.2782	7.26751	6.92726	7.41944	7.53259	6.89842	6.93112	6.88872	6.70623	6.90784	7.18914	6.93787	6.82762	6.93235	6.94908
Q61792	5	Lasp1	9.16975e-09	9.27227	9.18544	9.4094	9.23964	9.46199	9.98725	10.2056	10.3316	10.2522	10.4227	10.2211	10.1587	10.1469	10.3625	10.2978	10.2483	10.4425	10.1062	10.3795	10.3044
Q61879	1	Myh10	9.50786e-08	11.1877	11.2162	11.1245	11.1855	10.9835	11.1244	11.1377	11.2613	11.3228	11.2035	11.2134	11.3604	11.4131	11.3549	11.3723	11.2129	11.3461	11.1961	11.4276	11.3808
Q61937	3	Npm1	2.15819e-08	8.935	8.35738	9.00004	9.02262	8.53789	6.93292	7.37352	7.12182	7.19256	7.13383	6.78482	6.72055	7.08817	6.88594	6.84613	7.49347	6.68015	6.44855	6.64448	6.65058
Q61990	3	Pcbp2	0.0109244	8.21679	8.23665	8.4867	8.48285	8.59587	7.82007	7.50217	7.11084	7.6614	7.99738	7.17223	7.47082	7.30138	7.05414	7.13354	6.82305	6.87433	7.05418	6.76764	7.01047
Q62048	1	Pea15	5.77398e-08	6.2707	5.50199	5.94146	5.56895	5.60399	6.10766	6.77838	6.90598	6.55881	6.32019	6.42478	5.69682	6.60225	6.68028	6.33478	6.56175	6.47513	5.90036	6.50284	6.4377
Q62077	3	Plcg1	2.17335e-07	9.02722	9.05987	8.94085	8.93694	9.12727	8.89122	8.8989	8.7388	8.95916	9.07451	9.00378	9.04982	8.68224	8.88981	8.6587	8.49784	8.67864	8.69574	8.54047	8.54767
Q62083	8	Pick1	0.0147464	6.03856	5.73631	5.83556	5.12233	5.27541	6.17632	6.2362	6.24908	6.28757	6.37194	6.17128	5.8199	5.99949	6.22544	5.94249	5.73144	5.82528	5.59005	5.92763	5.82716
Q62108	5	Dlg4	0.000650305	8.54139	8.32551	8.79389	8.44113	8.53281	9.60042	9.81334	10.0844	9.84054	9.68625	9.86082	9.42657	10.1816	10.0957	10.0814	10.3016	10.1135	9.74047	10.2291	10.0955
Q62188	4	Dpysl3	0.00191174	11.093	11.0516	10.8789	10.9196	10.8424	11.161	11.15	10.7708	11.0541	11.2305	10.7002	10.634	10.2203	10.4575	10.2446	8.85287	8.58101	9.08271	8.48618	8.76299
Q62189	3	Snrpa	1.18348e-07	7.79966	8.03867	7.83071	8.09354	8.38956	7.10419	6.81357	6.54157	7.07819	7.08071	6.88689	6.6913	6.6196	6.49767	6.56012	6.13874	6.46946	6.77511	6.52709	6.71115
Q62203	3	Sf3a2	4.50389e-10	5.90126	5.98282	5.53646	6.0162	6.11016	4.6954	4.18747	4.2093	4.92687	4.94312	4.37758	5.28608	4.43275	4.64178	4.50467	4.37173	4.11158	4.48117	4.54426	4.31099
Q62261	5	Sptbn1	3.88436e-06	12.4112	12.2717	12.5053	12.5218	12.3447	13.0919	13.121	13.4534	13.2514	13.3594	13.4133	13.5058	13.7204	13.7014	13.4878	13.5419	13.7358	13.4278	13.7176	13.6377
Q62277	5	Syp	0.248824	5.27936	5.50916	6.70948	6.35723	6.04387	8.15538	8.10988	8.61282	8.5435	8.39914	9.28377	8.99649	8.97501	9.42203	9.17613	9.66756	9.83734	9.59927	10.1533	9.8378
Q62283	5	Tspan7	5.91954e-09	4.0328	4.10474	4.95306	4.57976	5.37215	5.14337	4.30706	4.41565	4.74559	5.08926	5.73462	5.91812	5.52903	5.65723	5.6905	5.72624	5.95291	6.22697	6.06041	5.85232
Q62318	3	Trim28	1.60292e-09	6.84996	6.10871	6.94403	7.17501	6.41507	5.71997	5.80437	5.17649	5.27552	5.77134	4.55933	4.657	5.07351	4.72888	5.30153	4.80196	3.40838	4.25746	4.55322	4.90148
Q62348	4	Tsn	4.80445e-05	6.28691	5.69757	5.80565	5.81371	5.30008	5.33057	5.57153	5.31011	5.79973	5.60777	4.44206	4.38423	4.8127	4.88913	4.88406	4.35438	4.11461	4.20588	4.15215	4.16303
Q62376	3	Snrnp70	3.9023e-06	9.37749	9.38146	9.10693	9.61263	9.69196	7.75955	7.6946	7.42244	7.92703	7.99641	7.16076	8.05666	7.89556	7.86536	7.61956	7.48966	8.14569	8.23745	7.8943	7.92662
Q62407	5	Speg	2.09779e-07	4.04718	3.56144	4.48356	4.46964	3.7842	5.0998	4.66024	5.04345	5.60397	5.48019	5.52192	6.45362	5.98283	5.84648	5.78601	5.51792	5.94621	5.74203	5.87968	5.94212
Q62415	5	Ppp1r13b	2.84536e-07	6.48383	6.46086	6.56555	7.09595	6.36223	7.23065	7.13424	7.28233	7.13816	7.27785	7.4266	7.38581	7.18448	7.27874	7.25167	7.5361	7.66804	7.48298	7.24107	9.14118
Q62417	5	Sorbs1	1.8766e-06	7.79553	7.8896	7.92913	7.83357	7.95883	8.16857	8.03897	8.25626	8.31446	8.44274	8.48801	8.50019	8.60886	8.44666	8.51273	8.23849	8.4071	8.25666	8.33031	8.28589
Q62418	4	Dbnl	0.00328787	8.40051	8.58635	8.42595	8.54097	8.64402	8.74504	8.58846	8.3297	8.69992	8.96626	8.5408	8.57752	8.60447	8.52198	8.33608	8.14574	8.24478	8.16876	8.09066	8.23984
Q62419	2	Sh3gl1	5.67436e-07	6.91142	6.86428	7.00789	6.98426	7.12526	7.26899	7.11795	7.08054	7.3135	7.15475	7.36312	7.42795	7.17789	7.09679	7.18305	7.08962	7.08202	7.13395	7.20781	7.04289
Q62420	5	Sh3gl2	0.000658394	7.01737	7.14391	7.44327	7.0725	7.29487	8.30876	8.30888	8.54062	8.11547	8.0395	8.78473	8.4124	8.73345	8.90491	8.9796	9.48322	9.4381	9.14374	9.57234	9.47353
Q62425	6	Ndufa4	0.00650608	6.85818	7.07748	7.41275	7.4157	6.88723	7.42146	7.48059	7.52196	7.58424	7.64089	8.2861	7.70042	8.46651	8.73543	8.57177	9.10776	9.05789	9.13398	9.32977	9.13879
Q62426	8	Cstb	1.21377e-09	6.70794	6.2098	6.42178	5.6526	4.13384	6.51742	7.30147	7.44294	7.25118	6.62791	6.28436	5.28092	6.6623	6.75256	6.61119	6.42921	6.49509	5.74774	6.44131	6.13432
Q62446	3	Fkbp3	3.03891e-08	6.33224	6.05125	5.98985	6.65545	6.47656	4.27573	4.81333	4.8733	5.23889	4.96107	4.59028	5.14799	4.74761	4.22833	4.80641	4.62474	4.64096	4.05204	4.2121	4.14035
Q62448	3	Eif4g2	0.0725749	6.44379	6.37243	6.33334	6.77723	6.98802	5.82536	5.68228	5.31829	5.2652	5.55172	5.30341	4.9856	4.97262	4.72772	5.04017	4.60809	5.06487	4.57152	4.89794	4.91209
Q62465	4	Vat1	5.98604e-07	7.38752	6.85755	7.52199	7.43519	7.32862	7.43317	7.83429	7.46239	7.15721	7.36065	6.90025	6.28657	6.54652	6.36189	6.89986	6.67509	5.79393	6.02522	6.30116	6.35339
Q62523	4	Zyx	6.71685e-08	4.9127	5.23812	5.38212	5.14443	5.70764	4.92764	5.05263	5.01059	5.29885	5.75701	5.18912	5.13914	5.05453	5.1057	5.0288	4.70441	4.91522	4.9172	4.34077	4.11378
Q63810	1	Ppp3r1	2.07125e-05	5.50338	5.13932	5.89502	5.28145	5.15684	5.71622	6.62848	7.66624	6.65704	5.9433	6.14617	6.44428	7.72015	7.29783	7.27457	7.50019	7.40295	6.77239	7.70302	7.41483
Q63844	4	Mapk3	0.00953791	8.17797	7.96109	8.39834	8.08206	8.06246	8.68963	8.86807	8.8766	8.63683	8.84088	8.29992	7.87341	8.19914	8.13281	8.22333	7.87616	7.52269	7.35572	7.60065	7.65323
Q64010	4	Crk	0.000406309	5.98587	5.57692	5.59517	5.66217	5.77708	5.82008	5.62259	5.58405	5.85533	5.98531	5.74526	5.81902	5.47526	5.72875	5.53674	5.26846	5.68614	5.6043	5.31058	5.43455
Q64012	3	Raly	2.15405e-07	7.32067	7.14993	6.95778	6.98202	6.21298	5.71954	6.08884	6.3481	6.5828	5.60808	5.25122	5.24292	5.73548	5.92734	5.87964	5.51194	5.79963	5.20846	5.82339	5.31065
Q64096	4	Mcf2l	0.0516649	6.16216	6.54106	6.44857	6.08302	6.18635	6.48543	6.65291	6.68947	6.70528	6.68945	6.08685	5.88675	6.20732	6.36951	6.05128	5.66237	5.72555	5.42747	5.74702	5.75517
Q64105	4	Spr	0.000109731	6.4901	6.78133	6.70704	6.64728	7.08452	6.84299	6.85289	6.54284	6.91793	7.26604	6.86787	6.57007	6.40274	6.57579	6.37312	6.62606	6.7342	6.66901	6.65251	6.74312
Q64133	1	Maoa	1.25251e-06	4.51059	4.78284	5.18566	4.61856	4.73732	5.00833	5.38929	5.4374	5.06136	5.27865	5.23435	4.89454	5.36253	5.45122	5.61115	5.89763	5.47812	5.51748	6.06449	5.94419
Q641K1	4	Agtpbp1	0.121277	7.21288	7.56522	7.20392	7.04393	7.2046	7.4098	7.70442	7.31124	7.7929	7.66289	6.56816	6.51578	6.44887	6.75296	6.44875	5.82937	6.11802	6.04031	5.84782	5.95023
Q641P0	5	Actr3b	0.000168859	1.77644	4.24763	4.07004	3.09538	3.098	5.01598	5.03408	5.42043	5.47583	5.32251	5.24818	5.14248	5.50175	5.54289	5.58848	5.416	5.19002	5.18083	5.72023	5.60963
Q64213	3	Sf1	4.60891e-09	5.67108	5.42092	5.42065	5.87901	5.50157	4.58946	4.42177	3.58992	4.7645	4.7767	4.37387	4.19998	4.22779	4.19648	4.39193	3.76304	4.25216	3.51208	4.05892	4.36138
Q64332	5	Syn2	2.52374e-05	5.01851	6.28836	7.32306	6.85233	7.18518	8.86804	8.85269	9.35025	8.90119	9.06637	9.92365	10.075	9.64324	10.0604	9.97055	10.3309	10.2362	10.1757	10.3174	10.2635
Q64337	4	Sqstm1	9.46473e-06	5.07202	4.39355	4.85406	4.26066	4.59622	4.52452	4.12065	4.36869	4.54062	4.5212	4.03861	3.31883	4.0299	4.08152	4.00036	3.76274	4.03522	2.90331	3.38907	3.63616
Q64433	7	Hspe1	4.65884e-08	8.18254	8.6199	8.70836	9.14204	9.5036	8.17206	7.74206	7.65062	8.41302	8.70604	8.82796	10.0321	9.34416	9.6288	8.64638	8.79543	9.2729	9.40654	8.79403	8.80158
Q64511	3	Top2b	0.000468485	7.66604	7.40593	6.91288	7.44488	7.21244	5.78639	5.84837	5.67912	5.90873	6.04394	5.23144	5.44673	5.67685	5.6433	5.44588	4.90293	4.72754	4.12481	5.461	5.54989
Q64514	2	Tpp2	0.0100986	7.93484	7.85408	8.00015	8.06143	7.97289	8.21425	8.19685	8.31514	8.28413	8.29039	8.46403	8.60015	8.63323	8.54163	8.4982	7.84987	8.02611	8.03937	7.98375	8.05618
Q64516	5	Gk	2.55928e-07	2.50657	3.74329	4.60217	4.17575	4.89111	5.37849	5.28855	5.57638	5.30926	5.22865	6.05861	5.31754	5.84213	5.64352	5.86183	6.52344	6.44259	6.00446	6.36156	6.39002
Q64521	5	Gpd2	1.5542e-08	5.5862	6.10338	6.53923	6.49755	6.5035	7.06739	6.7399	6.8999	6.86184	6.96	7.33662	7.35792	7.62723	7.19995	7.81315	7.89463	7.60844	7.64047	8.07852	8.07843
Q64674	3	Srm	2.51682e-05	4.43988	4.71234	4.83935	5.09776	4.65493	4.25342	3.89081	3.41308	3.65898	3.91457	3.97743	4.35793	3.71995	3.55817	3.64528	3.41176	3.13727	3.61229	3.57921	2.75186
Q64727	7	Vcl	1.28485e-06	6.25505	5.93077	6.19222	6.59607	5.91456	5.67417	5.65638	5.71383	5.51103	6.07193	5.9069	5.74993	6.52852	5.6133	5.80329	6.16932	5.96322	6.21082	5.91501	6.34064
Q64737	3	Gart	3.68989e-05	6.96107	6.27179	6.17839	6.07377	5.90685	5.68993	6.29884	6.26145	5.98556	5.78403	5.33183	4.86414	5.16245	5.20159	5.2021	5.62656	5.60438	5.44191	5.48356	5.35827
Q68ED2	2	Grm7	4.37381e-05	5.97872	6.1364	6.27634	5.27174	5.8005	7.17081	6.84318	6.88317	7.60031	7.28702	6.92656	6.87119	6.41563	6.88354	6.66672	6.13718	6.30599	6.32236	6.45848	6.44843
Q68ED7	3	Crtc1	0.166083	6.47179	6.95824	6.67035	6.76117	7.16847	6.81174	6.67838	6.42715	6.76549	6.93216	6.36533	6.42561	6.25252	6.12597	6.05376	5.91484	6.50399	6.2	6.03378	6.01592
Q68EF6	2	Begain	3.27638e-05	4.69469	4.86948	5.34951	4.34628	4.32243	6.08277	5.99629	6.21046	6.50413	6.53517	6.17502	6.10865	6.39107	6.38089	6.1658	5.24298	5.4185	5.28017	5.38548	5.51543
Q68FD5	5	Cltc	0.000328074	10.5442	10.6442	11.0663	10.8893	10.7593	11.5529	11.857	12.4152	11.8863	11.9382	12.4137	12.0615	12.4593	12.7537	12.57	12.9718	13.0584	12.7821	13.2093	12.99
Q68FE6	4	Ripor1	3.49846e-07	7.20067	7.21516	6.86545	7.02882	6.87272	7.20526	7.16972	6.86719	7.08635	7.05597	6.4667	6.33268	6.19003	6.19609	6.02189	5.82212	6.142	5.78382	5.50402	5.7516
Q68FF0	3	Kiaa1841	1.00907e-08	4.8739	5.39243	5.20123	5.20619	5.39782	4.88168	4.72114	4.42425	5.42603	5.57103	4.4561	4.68796	4.66308	4.39322	4.01983	3.32129	3.8874	4.16466	3.88053	3.39776
Q68FF6	5	Git1	3.73671e-08	9.04766	9.25849	9.19292	9.34338	9.26856	9.57251	9.45594	9.37122	9.67553	9.79263	9.68005	9.80458	9.57166	9.70765	9.68962	9.85102	10.0243	9.88177	9.82233	9.87655
Q68FH0	2	Pkp4	3.85451e-05	8.43582	8.72952	8.67017	8.53242	8.78261	9.25133	9.11664	9.21654	9.45827	9.5231	9.28674	9.23342	9.19359	9.3034	9.01319	8.76429	8.96859	8.99973	8.81591	8.8565
Q68FL6	3	Mars1	2.69444e-06	4.24502	4.01872	4.70733	4.68041	4.79978	4.01498	4.21127	3.96709	4.24747	4.35016	4.27029	4.55667	4.04065	4.20698	4.15348	3.70409	4.09358	4.03998	3.63479	3.98177
Q69Z98	5	Brsk2	4.92572e-06	5.92919	5.48593	5.8201	5.78676	5.46962	6.06071	6.25749	6.20178	6.3764	6.23378	6.18688	6.66392	6.62525	6.4568	6.64656	6.70673	6.78642	6.42868	6.90824	6.72724
Q69Z99	3	Znf512	0.0106703	4.55676	4.65408	4.71884	5.424	5.44586	3.42069	2.54846	2.77134	3.03203	3.18474	1.69377	3.25005	2.21828	2.83537	2.28583	2.33816	2.56882	2.47371	2.57234	2.27122
Q69ZF3	2	Gba2	2.22846e-06	5.73977	5.90825	5.80514	5.73522	6.0572	6.24016	6.41014	6.59043	6.4772	6.41294	6.61559	6.77516	6.28004	6.46636	6.42335	5.90307	6.43858	6.50697	5.91996	6.29016
Q69ZH9	4	Arhgap23	3.72627e-07	8.66726	8.75503	8.91955	8.57714	8.48819	9.15904	9.46723	9.51243	9.66216	9.70269	8.6773	8.44993	8.44235	8.96004	8.49409	7.79408	8.03565	7.55992	7.7931	8.04091
Q69ZI1	4	Sh3rf1	0.000450956	3.95991	3.86728	4.11602	4.1953	4.13458	4.34621	4.18255	4.02976	4.36188	4.75745	4.17677	4.86853	4.02354	4.1713	4.03873	2.91116	4.02986	3.5042	3.85251	3.74543
Q69ZR2	3	Hectd1	6.42958e-08	5.70888	6.0066	5.53162	5.89958	5.92737	5.32308	5.20882	5.0123	5.51873	5.58199	5.19596	5.90504	5.41198	5.07694	5.10111	5.28533	5.52471	5.46878	5.33089	5.14186
Q69ZS0	4	Pdzrn3	0.0126819	7.94273	7.70574	7.81976	7.69108	7.71922	8.16023	8.50548	8.17554	8.39451	8.31953	7.22891	6.52181	6.99944	7.3567	6.77766	6.41796	6.44548	6.53033	5.89884	6.28176
Q69ZS6	5	Sv2c	0.0163736	4.36699	4.61882	4.50404	4.04106	4.54694	5.66664	5.3867	5.94631	5.78995	5.34281	6.01111	5.25771	6.15955	5.90676	6.0938	6.34959	6.26191	5.87742	6.66557	6.03479
Q69ZS7	3	Hbs1l	1.45682e-08	9.38413	9.3804	9.08418	9.06356	9.37197	9.37617	9.26598	9.12156	9.46814	9.42843	8.82281	8.87999	8.58139	8.52993	8.52524	7.74839	8.28628	8.19149	8.09112	8.16992
Q69ZS8	4	Kazn	7.55693e-07	6.49794	6.43619	6.2536	6.5582	6.32966	6.27584	6.31539	5.96659	6.41758	6.55722	5.8492	5.7208	5.66049	5.78588	5.72514	5.55122	5.65767	5.40428	5.31855	5.46321
Q69ZW3	3	Ehbp1	1.83372e-07	10.2554	10.1669	10.1573	10.2485	10.2701	10.0941	10.0707	9.82854	10.4413	10.4318	9.77786	9.6133	9.54267	9.81286	9.5278	9.25786	9.21183	9.18094	9.06768	9.11524
Q69ZX8	4	Ablim3	0.159322	6.94297	7.20175	6.98218	6.81229	7.45162	7.02686	7.06977	7.26564	7.33292	7.40807	6.96701	7.30268	6.74428	6.94458	6.99179	6.76369	7.09346	6.76567	6.81767	6.80949
Q69ZZ6	8	Tmcc1	1.03721e-07	3.5586	4.14235	4.39682	4.20558	3.84576	4.66764	4.80269	5.01731	4.73779	4.71158	4.35397	4.29919	4.31688	4.35523	4.43403	3.72904	4.43101	3.94948	4.31405	4.33306
Q6A065	4	Cep170	0.0576545	11.9846	11.7863	11.5595	11.6547	11.5276	11.3638	11.6674	11.4904	11.8274	11.6876	10.4838	10.4554	10.5229	10.7194	10.5058	9.84861	10.2046	9.93398	9.99919	10.0295
Q6A0A9	1	FAM120A	0.000848435	5.64153	5.21222	5.61201	5.33721	5.0734	5.65929	5.86401	6.27302	5.58805	5.61376	5.75862	5.27285	6.63062	6.34661	6.17135	6.10698	6.27228	5.64467	6.41092	6.35282
Q6A4J8	1	Usp7	6.5595e-10	6.67041	6.66357	6.67758	6.70392	6.59444	6.92754	7.14157	7.65636	7.2479	7.30532	7.08244	6.9	7.61514	7.68988	7.5398	7.41705	7.49628	7.29655	7.71032	7.71391
Q6DFV3	4	Arhgap21	0.0205001	8.9439	9.06758	8.19271	8.25184	8.57345	8.41228	8.36666	8.19451	8.48607	8.51578	7.92928	8.09585	7.85644	8.07641	7.76849	7.58418	7.81047	7.74537	8.09912	8.11433
Q6DFW4	3	Nop58	0.000797075	4.42872	5.30648	4.56489	4.89868	4.51171	4.02604	3.13265	2.77623	3.69257	3.47264	2.89572	3.13264	3.54179	3.50345	3.61313	2.77715	3.03334	4.21526	3.66228	3.32366
Q6EDY6	4	Carmil1	0.291092	7.29426	7.3292	7.12511	7.26772	7.1855	7.19241	7.27602	7.44554	7.61125	7.50525	6.85368	6.69023	7.03143	7.28885	6.9112	5.77457	6.0322	5.95092	5.58256	5.70869
Q6GQT9	5	Nomo1	0.000390276	4.30137	4.78543	4.57567	4.16533	4.21739	4.18225	4.15881	4.15879	4.49822	4.6282	4.79795	4.92549	5.4362	4.97787	5.06193	3.85011	4.35023	4.64862	4.73846	4.77673
Q6I6G8	5	Hecw2	6.26819e-09	5.71685	5.4883	6.08044	5.81946	5.8003	6.92382	6.95156	7.51184	7.16929	7.45159	7.18398	7.04101	7.2117	7.33284	7.17358	6.61603	6.91169	6.64565	6.8062	6.89616
Q6IFX2	7	Krt42	0.00587263	8.78531	8.02115	8.17135	10.229	7.7044	7.59255	7.62205	7.56678	6.71674	6.45403	6.43835	7.81726	7.58879	6.95405	6.54279	8.26023	7.93478	7.70606	7.43713	10.105
Q6IMP4	1	Panx2	4.81468e-08	3.97324	2.74791	3.9657	3.38995	3.40212	4.45311	5.08558	4.91574	4.9271	4.80312	4.27799	3.29396	4.31023	4.57153	4.49136	3.76374	4.45566	4.44724	4.59789	4.65539
Q6IR34	4	Gpsm1	0.0278114	9.2245	9.30683	9.02009	8.87476	9.01009	8.8866	8.96622	8.59406	9.20912	9.15207	7.94164	7.85207	7.62707	7.83944	7.45149	6.68102	6.82765	6.78973	6.45266	6.72394
Q6IRU5	5	Cltb	0.00158648	8.11234	8.34632	8.85215	8.74413	8.87214	9.29594	9.28562	9.6049	9.84957	9.86285	10.0477	9.8708	10.295	10.4496	10.3093	10.478	10.5528	10.1792	10.9108	10.7371
Q6KAR6	3	Exoc3	3.02786e-10	5.58663	5.31913	5.39018	5.25776	5.58754	5.12562	5.26057	5.27517	5.20225	5.41438	5.18937	4.8346	4.83889	4.73363	5.03721	4.98101	5.25321	5.06316	5.16921	5.02373
Q6KAU4	3	Mvb12b	1.93788e-07	6.009	6.10662	5.96442	6.36005	5.97609	6.15317	5.66285	5.63709	6.03357	6.05764	5.87371	5.81181	5.34302	5.56648	5.5743	4.8073	4.93277	5.18559	4.75528	4.82296
Q6NS60	5	Fbxo41	0.000466329	8.18326	8.3236	8.47987	8.35547	8.31827	8.92624	8.80332	8.73015	9.14978	9.19812	9.08804	9.20715	8.9486	9.15445	9.16294	8.98773	9.23851	8.99251	9.09759	9.08737
Q6NSW3	4	Sphkap	1.13617e-06	7.18692	7.46805	7.79951	7.41917	6.94384	8.39158	8.32397	8.19239	8.69154	8.85373	7.74317	7.25061	6.98243	7.59479	7.03262	5.6208	5.57799	5.79166	5.30655	6.06188
Q6NVE8	1	Wdr44	8.33014e-07	7.70137	7.59922	7.57878	7.32709	7.32899	8.10279	8.01881	8.14324	8.16222	7.89174	7.91535	7.5011	7.95798	7.89585	7.88851	7.83851	7.98577	7.74375	7.92723	7.9062
Q6NXJ0	3	Wwc2	1.54138e-08	4.88812	5.0062	5.10612	4.99662	4.78927	4.83005	4.64035	4.57344	5.09351	5.24391	4.3265	4.61937	4.57293	4.32377	4.2379	3.49221	4.15891	3.92792	3.20446	3.98255
Q6NZJ6	4	Eif4g1	0.00027755	8.23791	8.09992	8.05252	7.97379	7.60579	7.9496	8.00971	7.90094	8.26615	7.94085	7.38182	7.40493	7.86916	7.58094	7.69264	7.12599	7.45887	7.1149	7.33256	7.31463
Q6NZL0	4	Soga3	1.52094e-05	10.629	10.6021	10.5996	10.5059	10.3706	10.6265	10.4482	10.2877	10.681	10.6926	10.392	10.3185	10.1468	10.2391	10.1723	10.1185	10.3242	10.1195	10.1193	10.1504
Q6NZM9	8	Hdac4	4.26242e-05	5.45876	5.47713	5.29675	5.07488	5.17656	5.92681	6.60327	6.83632	6.42594	6.41958	6.1342	5.27473	6.19706	6.29179	6.16916	5.77291	5.56179	5.3206	5.53986	5.54552
Q6P069	2	Sri	0.000267493	8.20626	8.84507	8.76727	8.54792	8.76452	9.20322	8.88718	8.81201	9.2298	9.47629	9.18433	9.15053	8.75965	9.03679	8.82812	8.67525	8.77718	8.79856	8.56235	8.70996
Q6P1F6	1	Ppp2r2a	0.00833588	5.57546	5.50476	5.80286	5.48851	5.08189	6.0495	6.0165	5.99078	5.92607	6.09626	6.31193	5.79319	6.20348	6.01257	6.25203	6.52483	6.04449	6.18197	6.3581	6.39907
Q6P1I6	4	Psd2	0.255454	7.34556	7.32671	6.8445	6.75736	6.59015	6.75488	6.62417	6.29602	6.82218	6.54318	5.70235	5.3144	5.46798	5.60223	5.31496	4.70679	4.4735	4.78653	4.58406	4.91151
Q6P4S6	5	Sik3	8.80511e-05	5.57069	5.91068	6.27468	6.03698	6.12639	6.74864	6.90832	7.16003	6.83411	6.93272	7.37698	7.50416	7.79392	7.42425	7.71474	7.69319	7.86398	7.63638	7.84073	7.82693
Q6P4T2	3	Snrnp200	3.56447e-09	6.2764	6.16802	6.08815	6.33849	6.09268	5.28173	5.31444	4.90809	5.2895	5.36679	4.49073	4.85907	4.76288	4.8196	4.9114	4.82277	4.30002	4.30663	4.81568	5.2419
Q6P542	3	Abcf1	4.94753e-09	6.76306	6.68576	6.9647	6.8934	6.93409	6.13084	6.0632	6.20088	6.32943	6.30761	5.93213	6.09293	6.26352	6.08741	6.14109	5.86043	6.0049	5.96505	6.11027	6.052
Q6P5B0	3	Rrp12	4.04532e-07	5.08985	5.6274	5.00739	4.63725	6.52029	4.57294	3.39351	3.50002	4.07311	4.57593	3.64163	4.19194	4.09999	4.27219	3.34857	3.89643	3.77664	4.34649	4.19993	4.16897
Q6P5D3	4	Dhx57	5.29883e-08	6.65719	6.35401	6.78173	6.52066	6.47673	5.95058	6.13182	6.05794	6.34382	6.16899	5.00913	4.75041	5.35831	5.0579	4.91217	4.64248	5.05577	4.79483	4.2649	4.47753
Q6P5D8	3	Smchd1	0.00149898	4.98292	5.13969	5.4323	5.63878	4.76874	4.58964	4.34392	4.14842	4.7006	4.47027	4.13559	4.02795	3.99492	4.62497	3.97339	3.55658	3.66446	3.5264	3.94713	3.90516
Q6P5E8	5	Dgkq	3.94301e-06	5.07785	5.55669	6.108	5.93119	5.94944	6.68736	6.70172	7.12721	6.72927	7.01955	7.52097	7.29539	7.61659	7.63317	7.66315	7.92678	7.86472	7.69979	7.74082	7.84874
Q6P5F7	2	Ttyh3	0.712912	4.68279	5.03233	4.94317	5.12805	5.19431	5.78031	5.48514	5.31188	5.32603	5.27875	5.53029	5.19165	4.9105	5.29494	5.16393	4.75637	4.34692	4.5002	4.77834	5.03133
Q6P5F9	8	Xpo1	1.72942e-08	6.28054	6.28641	6.26246	6.21171	5.71662	6.20384	6.42352	6.7198	6.669	6.43154	6.38772	5.88978	6.46569	6.4233	6.27997	6.2127	6.21612	6.08984	6.44065	6.4079
Q6P5U7	4	Nwd2	0.000816964	9.40238	9.63952	9.31102	8.97482	9.09958	9.6944	9.71486	9.53379	10.0281	9.87112	9.5113	9.21139	8.9347	9.43816	9.22019	8.94965	9.04402	8.89029	8.90732	8.83713
Q6P8X1	6	Snx6	0.141904	6.55539	6.3565	6.63636	6.60208	6.47759	6.67359	6.53864	6.68817	6.52528	6.67112	6.57283	6.5956	6.76815	6.5918	6.85261	7.14933	6.80577	6.84418	7.02529	7.00663
Q6P9K8	5	Caskin1	0.000116764	8.9978	9.12609	9.30676	9.21306	9.34207	9.92171	9.78528	10.0448	10.1743	10.3578	10.0152	10.2696	10.2285	10.403	10.1876	9.74969	10.1156	9.9951	10.1308	10.1535
Q6P9K9	1	Nrxn3	0.00022659	4.50549	4.64144	5.38599	4.77658	3.97197	5.99574	6.6163	7.01062	6.3403	6.16633	6.07264	4.74514	6.17002	6.32384	6.21245	6.18856	6.14722	5.61548	6.33506	6.13534
Q6P9Q6	2	Fkbp15	7.66588e-07	6.56509	6.84445	6.97595	6.68917	6.46401	7.40059	7.28221	7.6058	7.59424	7.50307	7.40241	7.42703	7.38688	7.62869	7.40324	6.69197	6.98858	6.76306	6.83931	6.96822
Q6PA06	5	Atl2	7.78654e-07	4.71845	4.46015	4.68624	4.41021	3.35835	5.3663	5.07334	5.31486	5.88661	5.18354	5.40711	5.41386	5.7201	5.56271	5.69831	5.22828	5.52801	5.35299	5.74707	5.4879
Q6PAK3	5	Prmt8	0.000163794	5.83067	6.2607	5.77628	5.42747	5.47898	5.82404	6.28632	6.88574	6.83539	6.40013	6.28659	6.43151	6.99444	7.16718	7.16085	6.47253	6.51613	6.25012	6.83491	6.57207
Q6PAR5	4	Gapvd1	0.801452	7.91356	7.77925	7.85499	7.77699	7.80029	7.95	7.9706	8.04039	8.16335	8.08289	7.68869	7.60041	7.53497	7.70439	7.56039	7.19057	7.23989	7.11514	7.12511	7.13692
Q6PB44	5	Ptpn23	0.00286148	8.25732	8.07749	7.96524	8.17788	8.10621	8.27001	8.35468	8.36358	8.4754	8.45276	8.41155	8.33009	8.39313	8.46992	8.35254	8.50211	8.74923	8.28389	8.66607	8.57999
Q6PD03	5	Ppp2r5a	0.401937	5.67771	5.39417	5.99435	5.42044	5.16902	6.92542	6.98593	7.35971	7.07713	7.09352	7.31531	7.14984	7.70312	7.82614	7.7536	7.48686	7.66504	7.29688	7.92451	7.92148
Q6PD10	4	Ip6k1	0.326324	6.09506	5.945	6.18409	6.50092	6.57164	6.44775	6.35961	6.16055	6.60383	6.7188	6.3422	6.64889	5.93839	6.03366	6.20887	5.65997	5.77773	5.96626	5.71052	5.85775
Q6PD21	4	Shb	2.55393e-08	5.30995	5.1013	5.00737	5.0883	5.06225	4.82562	4.94443	4.7654	4.75416	4.45858	4.47481	4.47098	4.68689	4.33743	4.23157	3.88537	4.21767	3.59649	3.73672	4.11047
Q6PD28	4	Ppp2r5b	0.00333915	6.66442	6.72347	6.35723	6.5054	5.95901	6.60665	6.62801	6.37326	6.66714	6.58672	5.66961	5.47063	5.85232	5.86044	5.70343	5.33495	5.26605	4.80131	5.38448	5.3668
Q6PDC0	4	Rundc3b	7.02507e-07	4.02658	4.26604	3.98196	4.23592	4.88547	4.60293	4.04762	4.13893	4.32602	4.60437	4.45409	4.59275	4.20612	3.98462	3.95052	2.93457	3.26563	3.49131	3.38391	3.69102
Q6PDH0	3	Phldb1	3.57465e-07	6.96114	7.39391	6.64305	6.85127	7.10277	6.89561	6.71028	6.51761	6.87561	6.86038	6.18798	6.21431	5.92118	5.84563	5.77336	5.21923	5.51982	5.47355	4.71638	5.1924
Q6PDI5	4	Ecpas	0.000317462	5.23043	5.05972	4.89115	5.24076	5.4116	4.61369	5.11203	5.0042	5.0182	4.86731	4.75082	4.03419	5.02489	4.48636	4.61781	3.96197	4.26513	4.19484	4.11957	4.28705
Q6PDQ2	7	Chd4	6.86194e-05	5.8012	5.89151	6.14864	6.12184	5.38487	4.23985	4.41428	4.31908	4.75038	5.38248	5.19935	5.6584	4.93976	4.21411	5.66167	5.06248	5.41825	5.64003	5.39693	5.22693
Q6PDS0	3	Vstm2l	0.950685	4.58671	4.54567	4.17513	4.53304	4.88661	3.70207	3.4568	2.8511	3.73388	3.39012	2.19811	2.96648	2.62665	3.08525	2.14437	1.9794	2.3537	2.56693	1.53878	1.42796
Q6PDS3	4	Sarm1	0.00334441	7.46318	7.61528	7.55317	7.07685	7.32731	7.48919	7.38148	7.28453	7.45842	7.4891	7.04201	6.84047	6.71314	6.87457	6.70043	5.99862	6.25532	6.21762	6.1224	6.24675
Q6PDY2	7	Ado	4.61294e-07	5.76986	5.96301	6.21317	5.88974	6.29648	5.85359	5.58126	5.15635	5.61139	5.98399	5.60413	6.1433	5.87051	5.89441	5.86976	5.95344	5.85614	6.49794	6.09226	6.21388
Q6PE01	3	Snrnp40	7.89982e-09	5.26422	5.05093	5.05545	5.43715	4.51827	3.3474	4.23989	3.24527	3.76252	3.78989	3.61895	3.3173	3.242	3.04034	3.51823	3.56541	2.8553	2.80704	3.44511	3.57438
Q6PER3	5	Mapre3	0.0427542	6.3926	5.96493	7.16827	6.92375	6.56997	7.93792	8.07453	8.06933	7.87231	8.01879	8.57103	8.24693	8.64183	8.60279	8.64825	8.8314	8.86747	8.66113	8.84545	8.71546
Q6PFD5	5	Dlgap3	2.61309e-06	4.84654	5.13934	5.74633	5.76597	5.94499	6.72098	6.65012	6.98401	6.93311	6.92849	7.54175	7.98743	8.20407	7.79739	7.78524	7.5721	7.99066	8.03752	8.11555	8.02577
Q6PGC1	3	Dhx29	1.56913e-08	4.56433	4.38631	4.82526	5.28313	5.11306	4.42642	4.47477	4.25792	4.51646	4.67509	3.97056	3.88506	4.05965	4.22199	3.87733	3.86739	4.00996	3.58265	3.57887	3.06039
Q6PGF7	3	Exoc8	1.36486e-08	7.15402	7.2988	7.21236	7.4194	7.63247	7.30983	6.95251	6.97625	7.09282	7.32212	7.11776	7.25302	6.7302	6.83128	6.65339	6.72992	7.01126	7.03966	6.81339	6.87682
Q6PGN3	3	Dclk2	4.38084e-05	8.73464	8.86256	8.62426	8.74346	8.89206	8.19831	8.029	7.70496	8.2459	8.39391	7.90219	8.09442	7.95499	7.75524	7.67914	7.58698	7.81124	7.9534	7.83597	7.78865
Q6PH08	1	Erc2	0.00853388	9.79773	9.5198	9.30179	9.21868	9.01858	9.93773	10.1292	10.2675	10.3183	10.1766	10.2257	9.96505	10.2125	10.6352	10.5121	10.398	10.5195	10.1019	10.8219	10.7274
Q6PHN9	6	Rab35	1.90511e-06	9.77479	9.96429	9.66614	9.93879	9.76591	9.70845	9.40898	9.11454	9.68702	9.69685	9.78448	9.62442	9.71176	9.94904	9.68967	9.76894	9.86675	10.1352	10.1374	10.0258
Q6PHZ2	5	Camk2d	3.20805e-05	5.74151	5.24357	6.5283	6.94392	6.80827	7.97789	7.7507	8.39031	7.92134	8.10849	8.64265	8.57896	8.38407	8.72507	8.48461	8.37714	8.63246	8.45352	8.50302	8.57294
Q6PIC6	5	Atp1a3	0.00852562	8.92937	9.57976	9.88742	9.35408	9.68198	10.6402	10.5139	10.5482	10.7425	10.8416	11.2366	11.2784	11.5821	11.2883	11.666	11.8622	11.6005	11.836	12.1985	12.0264
Q6PIE5	5	Atp1a2	6.17771e-07	7.40481	7.69379	8.96739	8.18168	8.51647	9.46378	9.34092	9.52291	9.12759	9.44905	10.0677	9.99233	10.3399	9.93223	10.8697	10.8959	10.3347	10.5795	11.0599	11.0698
Q6PNC0	5	Dmxl1	4.83018e-07	6.49839	6.47413	6.34415	6.38417	6.38845	7.08214	7.1551	7.3542	7.30689	7.17731	7.21917	7.0659	7.36063	7.53652	7.42343	7.4294	7.37356	7.46641	7.54235	7.36045
Q6Q477	1	Atp2b4	0.193258	5.24627	5.65581	5.90077	4.96824	4.77673	6.39774	6.52632	7.19433	7.03281	6.85128	6.42919	6.6522	7.06596	7.13681	7.30874	6.97029	7.1018	6.36235	7.50474	7.54793
Q6R0H7	7	Gnas	1.25383e-08	7.03518	6.79142	6.9627	7.17975	7.27773	6.38717	6.22165	5.95059	6.04345	6.32613	6.33763	6.2777	6.08484	6.04832	6.08295	6.03818	6.18256	6.03203	6.22576	6.26908
Q6R891	2	Ppp1r9b	2.82658e-05	8.53833	8.55609	8.72748	8.74035	8.94758	9.01219	9.11177	9.20022	9.31142	9.33653	9.22848	9.10432	9.19131	9.2276	8.99844	8.6122	8.67656	8.6694	8.69123	8.7831
Q6RHR9	5	Magi1	5.0466e-07	8.74206	8.75487	8.68755	8.83677	8.82898	8.79989	8.71541	8.90288	8.94997	9.05366	9.08032	9.30503	9.01322	9.20687	9.14493	8.9882	9.25861	8.98649	9.07021	9.09475
Q6V4S5	2	Sdk2	5.92813e-06	4.66679	4.33641	5.01751	4.60556	3.44907	5.71323	5.59965	6.22489	5.6353	5.89491	6.16685	6.05729	5.93275	6.27621	6.23413	5.1135	5.25539	4.14526	5.11956	5.25156
Q6VNB8	5	Wdfy3	0.000224754	8.19146	8.14501	8.21785	8.23732	8.0733	8.53712	8.61466	8.79267	8.90212	8.87467	8.73074	8.54789	8.65106	8.80831	8.63751	8.65893	8.83788	8.60939	8.74131	8.72168
Q6Y685	5	Tacc1	2.05571e-06	3.7076	2.64487	5.05067	4.92295	4.61271	5.94375	5.74905	6.33167	6.05569	6.20584	6.86951	7.45674	6.63872	6.84787	6.80547	6.20568	6.84428	6.5904	6.32347	6.34112
Q6Y7W8	3	Gigyf2	0.3188	4.08083	3.993	4.11579	4.04504	4.56414	4.02537	3.56171	3.3329	3.43995	3.9362	3.95027	3.54839	4.1024	3.54545	3.61975	3.20331	3.80475	3.50902	3.34582	3.67463
Q6ZPE2	5	Sbf1	1.01703e-05	8.29041	8.58541	8.61149	8.46104	8.53022	8.93065	8.75234	8.91326	9.14276	9.12477	9.13435	9.35089	9.28404	9.29148	9.32213	9.64731	9.90357	9.71277	9.89758	9.88157
Q6ZPF3	5	Tiam2	0.00928879	5.3189	4.7936	5.48779	5.56349	5.32578	5.68008	5.30588	6.2998	5.77427	5.62723	6.10138	7.07748	6.82111	7.05734	6.82658	6.45351	6.67842	6.36564	6.53103	6.46886
Q6ZPJ0	5	Tex2	4.78585e-09	5.33286	5.90753	5.70663	5.50256	5.32449	5.95545	5.53589	5.82568	6.05754	6.22618	6.26334	7.07662	6.31004	6.48319	6.51364	6.03447	6.29184	6.48153	6.36097	6.45562
Q6ZPJ3	4	Ube2o	9.35331e-06	9.16625	9.63308	9.51286	9.14879	9.35571	9.63526	9.52355	9.47896	9.76302	9.92359	9.52456	9.75716	9.49173	9.51947	9.407	8.87178	9.19871	9.19642	8.89454	9.05278
Q6ZPQ6	5	Pitpnm2	0.00016615	6.81384	7.23546	7.3124	7.06703	7.35323	7.69909	7.84438	7.85086	7.93956	8.03273	7.34956	7.4801	7.45351	7.59412	7.45849	7.40384	7.94451	7.49427	7.65029	7.78461
Q6ZPU9	4	Kifbp	0.000341319	6.22492	6.66397	6.51017	6.10619	6.84518	7.0522	6.69191	6.56108	7.10772	7.02863	6.69701	6.7264	6.72492	6.59195	6.34974	5.84005	6.23359	6.33779	6.19872	6.00381
Q6ZPZ3	3	Zc3h4	9.85812e-05	6.10405	5.96033	5.66618	5.89797	6.40799	4.64716	4.20134	3.47484	4.41522	4.56514	2.96982	3.67137	4.01419	3.74601	3.74253	3.24383	4.27333	3.60854	3.56089	3.16023
Q6ZQ08	3	Cnot1	0.00122292	7.07661	6.89511	7.09151	7.40176	7.16625	7.0394	6.77615	6.68644	7.07717	6.91914	6.93752	7.00965	7.03668	6.98434	6.77032	6.64338	6.8405	6.79309	6.5514	6.71437
Q6ZQ18	5	Efr3b	4.29258e-07	5.25575	6.10197	6.07024	6.13515	6.05136	6.81943	6.57376	6.56982	6.73268	6.76609	7.35506	7.36448	7.07489	7.22699	7.10103	7.80245	7.94599	7.90072	7.88158	7.76702
Q6ZQ29	8	Taok2	0.00465833	5.39957	5.0866	4.84072	4.59624	4.83882	4.85798	5.13283	5.20483	5.60117	5.28123	4.68422	3.89007	5.13924	5.1912	5.06785	4.3777	4.19161	4.23461	4.80829	4.34957
Q6ZQ38	1	Cand1	1.27505e-08	9.1979	9.01615	9.13466	8.94583	8.82523	9.04605	9.53134	9.93003	9.48913	9.46873	9.16931	8.80232	9.56904	9.63	9.4721	9.60237	9.66561	9.25144	9.92109	9.796
Q6ZQ58	4	Larp1	0.0205276	8.07493	7.57987	7.82586	7.6455	7.48843	7.95591	8.33009	8.44108	8.48695	8.29134	7.6478	7.25364	7.77882	7.80892	7.70791	7.57843	7.43831	7.06855	7.39199	7.29471
Q6ZQ82	5	Arhgap26	0.0185966	6.88727	6.18494	6.30037	5.5984	5.91418	6.63423	6.9758	7.30743	7.11955	7.31491	6.99403	6.67464	7.56002	7.4023	7.51934	7.07252	6.87923	6.73953	7.2431	7.42108
Q6ZQI3	5	Mlec	5.72755e-05	4.23504	5.35312	5.1387	5.41236	5.15726	5.05242	4.57985	5.06826	4.70673	4.848	5.504	5.41375	6.01898	5.6791	5.25933	5.04558	5.35091	5.11722	5.36395	5.27204
Q6ZWN5	3	Rps9	0.00171824	9.47522	9.29206	9.05537	9.05706	8.60248	8.15191	8.6791	8.82046	8.76886	8.19865	7.74315	7.32393	8.43457	8.64612	8.16713	7.71306	7.95373	7.82814	8.22281	8.04822
Q6ZWR6	1	Syne1	0.0154147	5.72499	6.3032	6.28398	6.46611	6.16158	6.64329	6.93773	7.23159	6.88353	6.87457	6.76258	6.28788	7.1871	6.80698	6.85955	7.17182	7.03718	6.60282	7.14918	6.99783
Q6ZWV3	3	Rpl10	0.000824379	6.93552	6.95462	6.62421	7.01958	6.74055	5.08534	5.43265	5.56075	5.76754	5.45031	5.072	5.765	5.72132	5.72723	5.38739	4.92561	5.47797	5.58209	5.61718	5.45738
Q6ZWV7	3	Rpl35	0.00112069	6.39675	6.02615	6.02035	5.98498	6.30438	4.50983	4.47271	4.03869	4.19344	4.56196	2.95026	4.62328	5.00668	4.98063	4.37726	4.44855	4.77856	5.07317	4.81577	4.55427
Q6ZWX6	3	Eif2s1	6.50833e-07	6.29193	6.47574	6.0127	6.00263	5.37035	5.88368	5.36102	4.49389	5.68468	5.69226	5.13097	5.56103	5.46624	5.36169	5.46799	4.93861	4.95606	5.23396	5.03353	5.00805
Q71LX4	5	Tln2	6.86463e-05	9.09724	9.18237	9.43877	9.25165	9.26689	9.8909	9.93048	10.2834	10.1642	10.2637	10.256	10.1471	10.5795	10.5266	10.4094	10.2777	10.3273	10.1232	10.4692	10.4155
Q71M36	4	Cspg5	0.00559799	6.43632	6.24535	7.13359	6.69555	5.67513	6.71421	6.65405	6.57823	6.82961	6.77471	6.1624	5.99829	6.25471	6.06621	6.48622	6.07532	5.55651	5.72229	5.95436	5.9603
Q76LS9	3	Mindy1	7.57125e-08	3.74861	3.96914	3.82035	3.05318	3.85216	3.48568	3.1783	3.32885	3.84722	3.95379	3.20622	3.80349	3.50379	3.4341	3.50095	2.42165	3.1497	3.75044	2.6461	3.2966
Q76MZ3	1	Ppp2r1a	0.00439677	10.1344	9.77077	10.2063	9.98844	9.72123	10.3658	10.6474	10.7015	10.3233	10.3553	10.2219	9.47239	10.4464	10.4364	10.3475	10.5373	10.421	9.98096	10.4012	10.2885
Q78IK4	6	Apool	0.0915734	5.4995	6.00861	5.63403	5.95273	6.30739	5.18775	5.12568	5.32962	5.44849	5.22105	5.69739	6.17776	5.74351	5.98454	5.85424	5.99385	6.68212	6.67692	6.65707	6.42641
Q78JE5	3	Fbxo22	0.0545519	6.02876	5.30201	6.25895	6.13239	5.7447	5.67986	5.60179	5.26845	5.69202	5.8693	5.47983	5.4263	5.25086	5.3773	5.32902	4.87583	5.07734	5.36602	5.30031	5.35855
Q78JW9	4	Ubfd1	2.14064e-05	6.74783	6.3477	6.48696	6.01266	5.76105	6.59364	6.93434	7.10549	7.14326	6.71497	6.31899	5.91829	6.40432	6.39081	6.23673	5.81739	5.68043	5.3424	5.75105	5.49497
Q78PY7	3	Snd1	0.00325547	8.73581	8.66495	8.67667	8.99019	8.58272	8.31478	8.01471	7.74114	8.1059	8.25711	8.12946	8.13866	8.14378	7.94948	7.96578	7.39053	7.47388	7.5832	7.64352	7.68526
Q78ZA7	4	Nap1l4	3.21089e-05	7.63601	6.84702	7.52662	7.43192	6.95015	6.75765	7.28963	7.32071	6.86036	6.68887	6.396	6.06309	6.55273	6.49472	6.78135	6.45247	6.19802	6.13131	6.2204	6.22354
Q791T5	6	Mtch1	1.94578e-07	7.08933	7.47525	7.29324	7.43934	7.76166	7.11588	6.88282	7.08668	7.33748	7.16695	7.32715	7.51036	7.53493	7.81452	7.26637	7.34672	7.60257	7.99458	7.82411	7.81429
Q791V5	6	Mtch2	0.000119178	4.51373	4.51167	4.65845	5.03501	5.28142	5.07329	5.29355	5.51876	5.12223	4.98739	5.69309	4.40332	5.73663	5.5861	5.79818	6.34491	6.12926	5.74115	6.36497	6.05732
Q7M6Y3	4	Picalm	0.00672586	5.57286	4.68564	5.09346	5.32698	5.21502	5.44906	5.08348	4.61006	4.82298	5.03705	4.37442	5.08507	4.63792	4.26381	4.45376	4.30745	4.58887	3.59672	4.54018	4.47145
Q7SIG6	5	Asap2	0.00059264	6.15262	6.62948	6.89277	6.61708	5.89153	7.16969	7.31581	7.7008	7.45101	7.25197	7.45921	7.22791	7.43493	7.56106	7.66214	7.33643	7.43876	7.2136	7.44173	7.48578
Q7TME0	2	Plppr4	0.00485912	7.38588	8.20618	8.246	8.07249	8.05421	8.7678	8.54452	8.31243	8.8451	9.00515	8.49691	8.4942	8.54514	8.40919	8.30756	7.67491	7.88276	8.12874	7.95962	8.08201
Q7TMF3	6	Ndufa12	2.88371e-05	5.84217	6.01539	6.08732	6.22145	5.82898	6.08103	6.06958	6.21772	6.16563	5.91234	6.80264	6.13985	6.96681	7.06031	7.13995	7.34012	7.50502	7.41119	7.92209	7.66933
Q7TMK9	3	Syncrip	0.000526551	11.1682	10.8209	10.7925	11.1833	11.0058	9.95552	10.1989	10.1157	10.1605	10.2319	9.48421	9.6696	10.1531	9.97036	9.89239	9.47366	9.57529	9.66296	9.73247	9.71524
Q7TMM9	1	Tubb2a	3.49523e-07	7.62105	7.30673	7.72819	7.81898	7.29214	8.28575	8.79024	8.60761	8.22887	8.33692	8.27424	7.41256	8.58419	8.41575	8.55091	8.56133	8.19216	7.82871	8.52396	8.38972
Q7TMY8	2	Huwe1	5.82918e-08	8.38002	8.44307	8.3013	8.58045	8.36294	8.62438	8.54476	8.651	8.91173	8.80014	8.56567	8.64654	8.66943	8.78316	8.56128	8.01724	8.38815	8.1232	8.27719	8.33461
Q7TN29	6	Smap2	0.00367514	6.09642	6.0093	6.08411	6.22942	6.47678	6.27881	6.17633	6.12334	6.26339	6.40235	6.35057	6.26172	6.38811	6.22736	6.29999	6.50775	6.60739	6.62234	6.70089	6.7676
Q7TN79	4	Akap7	0.000121328	6.12037	6.00829	6.64639	5.95938	5.38145	6.24056	6.32211	6.29697	6.62868	6.35814	5.79932	5.48006	5.99244	6.08717	5.88138	5.45236	5.35684	5.33853	5.47553	4.94986
Q7TNC4	3	Luc7l2	0.00015778	9.17998	8.74555	9.18478	9.31305	9.09812	8.18153	8.37316	8.06125	8.27208	8.32487	7.7289	7.58843	8.02957	7.88424	8.14163	7.94437	8.03173	8.09463	7.93366	8.16784
Q7TNF0	5	Doc2a	0.000384443	3.43189	4.00776	3.39609	3.01544	3.89847	4.28736	4.14167	3.92654	4.59367	5.02674	3.91742	4.16511	4.11822	4.14491	4.64179	3.95798	4.35685	3.74477	4.32048	4.46044
Q7TNG5	4	Eml2	1.33325e-07	5.57312	5.90491	5.84221	5.44468	5.46394	6.42045	6.03555	6.06207	6.45781	6.55874	6.01524	6.06647	6.29645	6.04279	5.75024	4.63961	4.76717	5.16637	4.84089	5.11774
Q7TNM2	3	Trim46	0.0127616	5.18454	5.21629	5.02505	5.58155	5.13462	4.68364	4.69212	4.86662	4.82639	4.71112	4.5425	4.72053	4.99138	4.86197	4.97908	4.64918	4.83637	4.84162	5.13557	4.89343
Q7TPB0	4	Plppr3	0.00296325	10.504	10.4371	10.0489	10.1901	10.5141	9.63476	9.48866	9.26454	9.9724	9.99646	9.05341	9.03308	8.61732	8.80977	8.50197	7.26617	7.31439	7.59594	6.41536	7.01743
Q7TPD3	8	Robo2	0.448288	8.95348	9.20345	9.06369	8.86199	8.7677	9.57522	9.745	9.75688	9.97175	9.82302	9.54154	9.20249	9.17199	9.7589	9.36264	8.80165	8.805	8.72894	8.93552	8.75174
Q7TPH6	4	Mycbp2	4.26102e-09	9.42472	9.36235	9.29426	9.3487	9.15052	9.07217	9.2214	9.08293	9.38871	9.28411	8.54758	8.44271	8.63484	8.5245	8.36791	8.16666	8.45618	8.02937	8.00365	8.10249
Q7TPM6	8	Fsd1	1.35054e-06	8.48011	8.29896	8.39578	8.19737	8.14249	8.40192	8.74729	8.66331	8.60821	8.4977	8.07736	7.96644	8.36367	8.27326	8.36554	8.13093	8.0944	7.89157	8.11478	8.03893
Q7TPR4	5	Actn1	6.38941e-09	7.08588	6.69538	7.29819	6.60455	6.87361	7.27002	7.25851	7.38444	7.15301	7.52825	7.86085	8.14978	8.88586	7.9989	8.25509	8.56957	8.48748	8.38806	8.6892	8.66283
Q7TPS5	6	C2cd5	0.000302098	5.31469	5.57684	5.40034	5.82355	5.76697	5.81058	5.62618	5.72936	5.71272	5.84947	5.81726	5.96531	5.96394	6.01662	5.82314	6.10309	6.21394	6.24432	6.40574	6.44723
Q7TQ95	6	Lnpk	2.89301e-07	6.96932	7.24497	7.01858	7.35538	7.18612	7.01894	6.65916	6.85997	7.02868	7.15274	7.08589	7.23801	7.07958	7.45786	7.40754	7.12418	7.55167	7.43552	7.44715	7.63911
Q7TQD2	5	Tppp	1.6768e-05	5.12411	5.82029	7.26139	6.56495	7.22811	7.94633	8.01581	8.36549	7.96078	8.30086	9.38871	9.75594	9.87052	9.47864	10.1248	10.8693	10.8288	10.5096	10.9446	11.0039
Q7TQF7	1	Amph	0.00563962	8.0695	7.91372	8.2256	7.83085	7.5833	8.64956	9.26142	9.85328	9.06426	9.0385	8.89062	8.99396	9.4538	9.56403	9.71484	9.8116	9.68193	9.11656	10.067	9.82503
Q7TQH0	3	Atxn2l	1.52368e-08	7.59909	7.23805	7.40715	7.85147	7.5895	7.08119	7.08377	7.03146	7.2347	7.21055	6.7557	6.78273	7.13477	6.61453	6.67291	6.46077	6.80341	6.38323	6.61597	6.77679
Q7TQI3	1	Otub1	1.04113e-05	7.31104	6.84728	7.3387	6.93838	7.03389	7.51075	8.00008	8.40161	7.81414	7.72159	7.53293	7.25148	7.97775	8.01871	7.99018	8.3715	8.06707	7.54505	7.93162	7.92473
Q7TSC1	5	Prrc2a	7.89116e-06	5.69885	5.84255	5.73783	6.05434	6.33154	6.10644	5.99209	6.25822	6.24883	6.15036	6.10175	6.40782	6.79801	6.51206	6.33141	5.9579	6.34665	6.02386	6.21304	6.28267
Q7TSG2	3	Ctdp1	0.00177476	5.22669	4.6179	5.09534	5.38458	5.27001	4.58987	4.30347	4.13839	4.72941	4.91476	4.15343	4.61567	3.9044	4.29838	4.25657	3.38448	3.92061	3.75722	3.4694	3.55065
Q7TSJ2	5	Map6	0.0178586	9.59961	9.6971	10.0263	9.77083	9.99002	10.536	10.7146	11.2138	11.1322	10.9182	10.9434	11.4392	11.8154	11.7357	11.7749	11.5669	12.0852	11.5195	12.3418	12.1714
Q7TSS2	5	Ube2q1	5.71969e-06	3.44889	3.15389	3.80554	3.88978	3.98522	4.84016	4.46702	4.65533	4.51158	4.73426	4.79484	4.70219	4.46699	4.5423	4.47452	4.83059	5.00105	4.54641	4.44043	4.51771
Q7TT50	2	Cdc42bpb	1.56649e-05	9.72456	9.78945	9.8852	9.71253	9.86346	10.2811	10.1444	10.1511	10.3881	10.4868	10.1412	10.2799	10.0359	10.176	10.013	9.73162	9.9562	9.80952	9.80478	9.79134
Q80SW1	1	Ahcyl1	0.753476	5.87954	5.50788	6.21693	5.85627	5.56939	6.39619	6.39011	6.41383	6.09684	6.20012	6.4532	5.17916	6.60916	6.4111	6.75746	7.05528	6.42089	6.29771	6.77384	6.83627
Q80SZ7	6	Gng5	7.0853e-06	7.16494	7.08979	7.20057	6.68062	6.48529	5.99012	6.02709	6.35677	6.3732	5.97079	6.29728	6.69209	6.84379	7.01258	7.29612	7.80691	7.69564	7.92347	8.32793	7.99359
Q80T41	5	Gabbr2	0.0255912	5.75142	6.36095	6.56764	6.32613	6.75313	7.17573	7.17	7.33574	7.35114	7.53062	7.49631	7.26356	7.28456	7.71412	7.43925	7.16968	7.43042	7.17547	7.4226	7.40935
Q80TA9	5	Epg5	1.4774e-06	3.84064	5.28601	4.19327	4.37774	4.85597	5.06636	5.3736	4.96818	5.17373	5.21314	5.58336	5.9076	5.11496	5.33591	5.18577	5.49219	5.74155	4.98891	5.18736	5.07067
Q80TE7	5	Lrrc7	9.33646e-06	6.74558	7.14304	7.89257	7.48866	7.70248	8.79586	8.57921	8.79597	8.73453	8.93719	9.46607	9.43289	9.96077	9.38322	9.44008	9.20139	9.30898	9.22832	9.29534	9.37446
Q80TF3	4	Pcdh19	0.00771895	6.81458	7.03168	7.35138	7.28771	7.60892	7.45247	7.27103	7.20231	7.91246	8.01909	7.14513	7.45672	6.83038	7.19722	6.95911	5.80737	5.88679	6.0776	5.64899	5.72488
Q80TJ1	5	Cadps	3.26347e-08	8.11268	8.18325	8.41351	7.93752	8.18509	9.07701	9.10149	9.31987	9.45183	9.24404	9.59197	9.36918	9.52024	9.682	9.58853	9.90891	9.94975	9.86124	10.0772	9.78747
Q80TK0	5	Kiaa1107	7.40682e-07	7.83342	7.92326	8.20484	7.89063	7.71128	8.50059	8.64372	8.95132	9.31718	8.88071	8.41297	8.98784	9.10948	8.98024	9.06326	8.13439	8.76465	8.48439	8.70282	8.62469
Q80TL0	5	Ppm1e	6.45879e-10	7.33086	7.32641	7.29932	6.89688	6.57551	7.98475	8.3899	8.67783	8.53438	8.36074	8.27267	8.06721	8.6128	8.79032	8.84214	8.30311	8.20908	7.81297	8.53613	8.30693
Q80TL4	5	Phf24	0.000105156	8.08912	8.37264	8.80915	8.52669	8.6192	9.08074	8.86011	9.06242	9.18456	9.26939	9.58118	10.0677	9.74796	9.78221	9.83174	9.94991	10.0611	9.90342	10.0619	10.0857
Q80TM6	2	R3hdm2	9.35159e-06	5.86288	6.14784	6.61679	6.07159	5.44725	7.43829	7.10596	7.27789	7.58489	7.67732	7.24405	7.18774	7.0347	7.32825	6.87763	5.73588	6.00256	5.99917	5.96387	6.20989
Q80TM9	5	Nisch	1.57249e-08	5.63358	5.89119	5.99234	5.60857	5.53662	5.6367	5.66129	5.65393	6.11921	6.01252	6.02769	6.25925	6.16879	6.14683	6.19076	6.20795	6.3269	6.10884	6.07846	6.17395
Q80TN5	7	Zdhhc17	6.66723e-07	3.47779	3.78852	4.0173	4.09448	4.45709	3.42555	3.16271	3.47491	3.78517	3.18044	3.46491	3.95606	4.04957	3.80175	3.57077	3.12395	3.21087	4.16823	3.35997	3.07479
Q80TN7	4	Nav3	0.000993246	9.25984	9.57235	9.43791	9.4226	9.49519	10.1889	9.98072	10.0516	10.2788	10.4364	10.1202	10.1751	9.82374	10.1484	9.77219	8.33995	8.71769	8.77636	8.46094	8.76348
Q80TQ2	5	Cyld	0.0462626	5.10607	6.08874	6.47211	6.10297	6.40334	6.99424	6.80008	6.933	6.98839	7.29684	7.53505	7.83079	7.74215	7.49395	7.46556	7.48765	7.62963	7.7612	7.71989	7.81735
Q80TR1	5	Adgrl1	8.74384e-09	7.05755	7.56919	7.66954	7.54189	7.65765	8.39342	8.43903	8.63996	8.80376	9.01446	8.79107	8.79618	8.58276	8.97401	8.61542	8.15549	8.41581	8.19346	8.36185	8.24785
Q80TS3	5	Adgrl3	1.95934e-06	4.44025	3.93774	4.37677	4.58702	4.07774	4.79537	4.93725	5.04977	5.02824	5.10056	5.35936	4.89146	4.93103	5.2719	5.16394	5.22953	5.22893	5.00464	5.39771	5.34144
Q80TT8	4	Cul9	5.49647e-07	6.6955	6.52013	6.65378	6.16075	6.25217	6.36284	6.8842	7.01485	6.99809	6.89404	6.30433	5.79121	6.57468	6.53082	6.11461	6.17749	6.0356	5.53211	5.92798	5.89269
Q80TV8	3	Clasp1	8.11805e-06	8.53463	8.29624	8.11837	8.24535	8.11342	7.81711	8.09612	8.20177	8.17617	8.29991	7.4015	7.55168	7.9601	7.7884	7.86569	7.49759	7.82554	7.44584	7.72217	7.64303
Q80TY0	1	Fnbp1	0.0008472	5.38867	5.34858	5.16448	4.55482	4.43785	5.29779	5.86296	6.55857	6.14265	5.88745	5.4092	5.00494	6.04654	5.78755	6.23134	5.9211	5.85362	5.19789	6.13814	5.72427
Q80TZ3	5	Dnajc6	0.000208042	7.44156	7.40346	7.84969	7.53766	7.29246	8.22536	8.41993	8.80379	8.61757	8.57184	8.81843	8.56762	8.87264	9.08364	9.0209	9.35794	9.32779	9.03781	9.45245	9.25113
Q80U22	5	Rusc2	0.0194242	4.21577	4.74307	4.79361	4.35577	4.30593	3.90468	4.75816	4.91762	4.50018	5.41094	4.90052	5.56666	5.02889	5.1551	5.09438	3.6421	5.03352	4.84095	4.67077	4.49517
Q80U23	5	Snph	1.48575e-08	4.53191	4.84264	6.26542	5.77151	6.24685	7.13212	7.05212	7.60105	7.45581	7.56162	8.07809	8.57529	8.21683	8.23977	8.40163	8.3458	8.68644	8.64563	8.60469	8.58
Q80U28	5	Madd	0.106141	8.17747	8.49835	8.59909	8.63712	8.64561	9.19575	9.11348	9.41301	9.39797	9.37013	9.73522	9.65055	9.60444	9.90031	9.85886	9.82096	9.99729	9.82761	9.95987	9.87557
Q80U30	5	Clec16a	1.34084e-07	4.1499	3.40816	3.93025	3.33079	4.65035	4.75765	4.53218	4.46779	4.61275	4.3591	4.17494	4.12329	4.70196	4.51432	4.56922	4.23204	4.40055	4.10079	4.47149	4.36229
Q80U40	5	Rimbp2	3.92938e-09	4.08938	5.00128	5.99117	5.10814	5.16521	6.97956	6.77542	7.34304	7.25198	7.43836	8.12262	8.24565	7.90994	8.25558	8.24804	8.23281	8.51493	8.29235	8.5341	8.57096
Q80U49	5	Cep170b	0.0334143	9.90457	10.0281	10.212	9.9243	9.92713	10.5976	10.6122	10.7713	10.9197	10.944	10.4946	10.8023	10.6485	10.7731	10.7318	10.2689	10.6726	10.2482	10.5872	10.581
Q80U56	5	Avl9	9.33125e-09	3.38325	3.84925	3.75274	3.61345	3.9887	4.12562	3.85042	3.75241	4.39977	4.47469	4.34959	4.45504	4.15657	4.44104	4.46192	4.28895	4.50573	3.95624	4.81657	4.92832
Q80U63	5	Mfn2	7.81433e-06	6.70653	7.23073	7.31125	7.21541	7.31201	7.58988	7.45816	7.65348	7.72879	7.76711	8.1765	7.88408	8.33247	8.20199	8.27301	8.61061	8.62844	8.51336	8.73412	8.69434
Q80U87	5	Usp8	0.00373323	3.62286	3.74757	3.57579	5.27968	4.11832	4.57941	4.33777	4.52026	4.68928	4.69115	4.92398	5.49328	5.04857	4.74166	4.86483	4.67494	5.10518	4.76219	4.33116	4.91046
Q80U95	4	Ube3c	1.76229e-08	5.92676	6.09119	5.69852	5.4941	5.74925	5.80663	6.09938	6.21719	5.95907	5.93227	5.77807	5.85882	5.79227	5.83352	5.58295	5.49554	5.49902	5.23274	5.30529	5.29354
Q80UG2	4	Plxna4	0.019745	10.1323	10.2756	10.0287	9.9672	9.99944	10.2039	10.1998	10.1356	10.3401	10.4164	10.029	9.56934	9.56382	9.9393	9.64646	9.35819	9.37952	9.30628	9.21987	9.29158
Q80UG5	6	Septin9	0.000191479	7.08433	6.14069	7.19743	7.04749	6.42741	7.82834	7.47751	7.91155	7.38104	7.52964	8.87681	9.02174	9.17188	9.49101	9.49396	9.83525	10.0067	9.94021	10.4475	10.3925
Q80UJ7	5	Rab3gap1	3.00352e-07	4.99027	5.26623	5.73799	5.5608	5.82235	6.38735	5.99204	6.56098	6.51449	6.25535	6.95428	7.32356	7.13195	7.12462	7.21142	6.93363	6.96693	7.01342	7.21693	7.04432
Q80UK0	4	Sestd1	2.35192e-09	8.50013	8.7196	8.59194	8.44165	8.50875	8.71501	8.59711	8.56159	8.74977	8.85351	8.52697	8.28007	8.08014	8.31801	8.04992	6.85269	7.0654	6.92213	6.6205	6.93653
Q80UM3	3	Naa15	4.97551e-08	6.25224	6.1378	6.04363	6.29466	6.16593	5.54792	5.16151	4.97334	5.42147	5.28477	5.31103	4.56175	5.27877	5.0768	5.01327	5.29866	5.51381	5.1317	5.21245	5.32308
Q80UP3	6	Dgkz	4.94162e-10	7.62212	7.94965	7.96416	7.83047	8.03635	7.9165	7.79782	7.74145	8.13362	8.1133	8.10342	8.51164	8.30977	8.35614	8.30976	8.15	8.60613	8.59525	8.52965	8.5401
Q80VC9	3	Camsap3	2.79978e-06	9.34272	9.46434	9.38734	9.37135	9.50412	9.49961	9.34343	9.09843	9.60214	9.71952	9.18448	9.18711	8.97158	9.19087	8.97204	8.35151	8.63697	8.71664	8.39465	8.54731
Q80VD1	3	Fam98b	0.000125906	6.67565	6.42349	6.9378	6.77544	6.77667	5.90861	6.14677	5.92029	5.92426	6.06509	5.23279	5.13776	5.48246	5.41994	5.67949	5.67061	4.96339	5.19205	5.6953	5.87344
Q80VP0	5	Tecpr1	1.95959e-06	8.92906	8.99062	9.21424	9.13376	9.30358	9.82702	9.78536	9.95011	9.94099	10.11	10.2936	10.0434	10.0933	10.3621	10.191	10.3121	10.4631	10.3577	10.4455	10.3969
Q80W04	3	Tmcc2	0.685966	3.50049	4.58033	3.51634	3.48609	3.67725	3.98726	3.19749	3.23841	3.95183	3.7932	3.29666	3.38031	3.40355	3.3822	3.23294	2.97891	2.92176	3.20628	2.93201	3.02808
Q80W47	5	Wipi2	2.89174e-09	4.01864	3.12501	4.5501	3.71604	2.52869	4.7748	4.79114	5.00846	4.87506	4.89439	5.00447	4.87801	5.21613	5.20565	5.27434	5.28051	5.28359	4.67436	5.37302	5.2716
Q80WC7	5	Agfg2	0.0100379	3.91807	4.48686	3.79451	3.92077	4.45234	4.98944	5.00047	4.96532	5.14135	4.90937	5.22855	5.54126	6.08417	5.68172	5.94109	5.53128	5.58625	5.6188	6.23728	6.08098
Q80WJ7	7	Mtdh	0.000111796	7.81261	8.27901	7.8819	8.16762	7.92409	7.35471	7.33496	7.61373	7.858	7.59808	7.44941	7.90103	7.9344	8.01342	7.6715	7.33189	7.61145	7.62462	7.66175	7.68186
Q80X50	7	Ubap2l	0.00927041	7.86822	7.83411	7.67124	8.08916	8.15063	7.4584	7.21079	7.17585	7.53407	7.72858	7.15994	7.96638	7.84588	7.37877	7.25756	6.89384	7.31687	7.29801	7.05437	7.247
Q80X80	5	C2cd2l	0.505434	3.93851	4.28771	4.8049	3.94428	4.5985	6.01177	5.42933	5.63057	5.86911	6.05286	6.30409	6.75056	6.96588	6.71446	6.86001	6.56529	6.87131	7.04332	7.23578	7.28665
Q80XA6	1	Reps2	0.00270077	4.83456	4.92551	4.80166	4.49983	3.74447	5.11353	5.32245	5.52947	5.76063	5.33633	5.50854	5.49934	5.9169	5.90422	5.94147	6.05464	6.19628	5.77227	6.61877	6.43804
Q80XI3	3	Eif4g3	1.00907e-08	7.57577	8.01761	7.95898	7.90206	8.09682	7.82585	7.69636	7.80732	7.96325	8.11487	7.29295	7.80446	7.72643	7.48454	7.53858	6.8898	7.29424	7.00986	6.79107	6.9948
Q80XI4	1	Pip4k2b	1.63514e-05	8.68983	8.48943	8.61515	8.51507	8.27071	8.78349	9.21733	9.1336	9.10058	9.10037	8.74596	8.0196	8.70365	8.86874	8.89067	8.92667	8.62339	8.54826	8.88323	8.7328
Q80XK6	5	Atg2b	6.50624e-06	8.33966	8.62536	8.59283	8.46258	8.49711	9.05793	8.99251	9.10963	9.13321	9.22201	9.02426	8.91742	8.92687	8.97773	8.94372	8.84179	9.09603	8.77229	8.93994	8.98439
Q80XP9	4	Wnk3	9.35127e-07	6.75566	6.46945	5.91972	6.43942	5.17024	6.01622	6.17899	6.08921	6.45937	6.20981	5.6505	5.39797	5.65152	5.68748	5.52375	5.04514	5.19378	5.09002	5.13265	4.80655
Q80XQ2	5	Tbc1d5	0.722829	4.74415	5.47671	5.39432	5.3193	5.61053	5.44269	5.2484	5.35847	5.74513	6.04267	5.88061	6.22048	5.56433	5.64979	5.88381	5.59231	5.95367	6.123	5.70058	5.84691
Q80Y24	2	Prickle2	0.000278255	6.60586	7.00569	7.01166	6.63182	6.49316	7.33828	7.49178	7.73288	7.80153	7.66076	7.20752	7.47354	7.52409	7.6602	7.64081	6.67517	6.93289	6.93656	7.02096	7.04348
Q80YA7	4	Dpp8	8.71778e-06	7.1684	6.99048	6.68131	6.43437	6.70567	6.8972	7.53846	7.54356	7.49455	7.3062	6.44695	5.91191	6.8633	6.80851	6.66283	6.10193	6.01655	6.02298	6.26132	6.17048
Q80YA9	5	Cnksr2	0.812356	7.9488	8.49699	8.92907	8.75669	8.99118	9.30823	9.13826	9.51347	9.52354	9.55169	9.63434	9.88558	9.51161	9.54005	9.483	9.28718	9.32766	9.25377	9.16271	9.15133
Q80YE4	8	Aatk	5.97513e-05	4.59145	3.65425	4.38308	3.44084	2.98403	5.2807	5.32324	5.33013	5.68184	5.34256	4.96263	4.91455	5.35617	5.30144	4.96225	4.49392	4.54258	3.98839	4.58546	4.73809
Q80YF9	3	Arhgap33	0.000124517	5.76855	6.0045	5.36399	5.69925	5.9332	5.62327	5.26259	5.10345	5.63749	5.76917	5.30416	5.34343	5.15763	5.4015	5.0839	4.6353	4.9635	5.09078	4.76992	5.03377
Q80YN3	5	Bcas1	6.95293e-05	3.95783	3.87079	6.35149	2.90612	5.28392	7.30193	7.23144	8.37408	7.97364	8.27862	8.28706	9.27494	9.89631	9.3887	9.63584	8.30712	8.96487	8.90168	8.8714	9.1853
Q80YV4	5	Pank4	0.000215643	4.55233	4.95052	4.55562	4.44437	5.05831	4.92682	5.17081	5.50832	5.17397	5.09121	5.5689	5.63596	5.56257	5.5024	5.5766	6.23077	6.64555	6.01359	6.2405	6.25585
Q80Z24	6	Negr1	7.28026e-07	5.79989	5.80217	6.69985	6.61535	6.18719	6.96436	6.76139	6.46786	6.03312	6.67381	7.22329	6.72424	7.07544	6.65393	7.58035	7.88862	7.22389	7.43813	7.86617	8.12865
Q80Z38	4	Shank2	1.21334e-07	8.20185	8.28377	8.26221	8.30682	8.29468	8.37463	8.35006	8.39595	8.76751	8.83807	8.33104	8.50042	8.3733	8.59259	8.40958	7.61909	7.86752	7.87138	7.8983	7.99627
Q80ZI6	4	Lrsam1	0.000164363	7.06912	7.6083	7.41086	7.22449	7.43446	7.69481	7.4558	7.30031	7.80465	7.83127	7.25973	7.44337	7.06512	7.22736	7.08545	6.62757	6.84469	6.89149	6.80525	6.90856
Q80ZS3	7	Mrps26	1.77191e-05	6.92029	7.03652	7.16822	7.44917	7.28398	6.84545	6.42185	6.1805	6.79657	6.82768	6.98286	7.05388	6.89177	7.12903	6.90009	6.53042	6.90413	7.19751	6.96468	6.95839
Q810A7	3	Ddx42	6.28447e-05	5.53547	5.01731	5.19006	5.59041	5.14036	4.2716	4.08399	3.52217	4.33161	4.3931	3.65455	4.03946	4.26793	4.22243	4.2798	3.70216	4.15521	4.03856	4.464	4.37494
Q810B7	2	Slitrk5	0.0116369	4.32971	4.1061	3.97363	3.9869	3.41253	4.4323	4.38466	4.29256	4.66936	4.86069	4.41263	4.86334	4.90066	4.65997	4.67074	4.23979	3.8649	4.4393	4.34783	4.42599
Q810J8	5	Zfyve1	2.6363e-05	4.27887	4.57699	5.19574	4.00549	4.83669	5.37293	5.19248	5.57365	5.35941	5.46564	6.13793	6.43954	6.21872	6.27807	6.52133	6.17347	6.17675	6.22888	6.02697	6.15241
Q810U3	5	Nfasc	0.00249755	9.047	9.1029	9.36147	9.25911	9.23566	9.58149	9.35215	9.6404	9.73381	9.95888	9.9631	10.2072	10.124	9.96828	10.1667	10.7323	10.8925	10.655	10.8728	10.9325
Q810U4	5	Nrcam	1.6672e-07	5.08934	5.27133	5.0412	4.71554	5.17697	5.34465	5.43368	5.82457	5.44846	5.54793	5.76838	5.85803	5.5374	5.598	5.70263	5.69613	5.6291	4.69312	5.70155	5.5702
Q811D0	5	Dlg1	2.89174e-09	6.35459	6.51529	7.20699	6.79691	7.14807	8.63058	8.62374	9.49662	8.91473	9.02835	9.71959	10.1291	10.0142	10.1938	10.1954	10.3279	10.5651	10.3032	10.7339	10.6099
Q811L6	3	Mast4	0.0139905	4.93523	4.93038	4.77002	4.7756	5.38562	4.4443	4.15181	3.8346	4.14411	4.49197	3.62443	4.24477	3.91761	3.67512	2.88685	3.29744	3.84061	3.75218	3.80125	4.36581
Q811P8	5	Arhgap32	4.33307e-10	7.23918	7.2675	7.43703	7.61517	7.499	7.5694	7.51137	7.78699	7.99397	7.91587	8.15188	8.48603	8.30148	8.26577	8.36591	8.15445	8.5146	8.18537	8.45353	8.33909
Q812A2	4	Srgap3	0.000283189	9.67369	9.83713	9.75946	9.58493	9.67128	9.95601	9.97652	9.97424	10.1699	10.2907	9.78392	9.78072	9.52646	9.85528	9.61014	9.41565	9.62073	9.50982	9.41827	9.51109
Q8BFQ8	3	Gatd1	7.40682e-07	5.94441	5.93013	6.13313	6.02831	6.12334	6.06621	5.55287	5.52365	5.72095	5.8451	5.66107	5.38772	5.42757	5.36047	5.82731	5.61022	5.15881	5.23482	5.52681	5.67315
Q8BFR5	6	Tufm	2.43464e-05	7.56926	7.11882	7.86479	8.0047	8.0465	7.54574	7.42692	7.13551	6.96387	7.27947	7.83341	7.37436	7.59596	7.07487	7.95545	8.5886	7.7378	7.88825	8.27682	8.35754
Q8BFS6	5	Cpped1	0.00145746	3.96714	3.18475	4.96892	4.92032	4.49997	5.58892	6.12285	6.383	5.79583	5.5367	6.05056	6.01445	6.03177	5.98918	6.17454	6.08875	6.13401	5.5659	5.66204	5.59067
Q8BFT9	1	Svop	0.00657025	6.87729	6.98088	7.11516	6.69031	6.57335	7.24825	7.41322	7.6157	7.61376	7.32772	7.21641	6.89582	7.47327	7.70116	7.32141	7.26063	7.27645	7.20703	7.6652	7.47855
Q8BFU3	8	Rnf214	5.93276e-05	8.09681	7.92236	8.23885	8.04151	7.51872	8.09829	8.6846	8.94691	8.58515	8.42708	8.00582	8.03331	8.21975	8.35621	8.45904	7.68342	7.87972	7.3858	7.54391	7.60444
Q8BFY6	5	Pef1	0.00354866	4.56732	5.16533	5.13708	4.20278	4.94666	5.33288	5.18883	5.34754	5.32996	5.54643	5.53385	5.54788	5.43581	5.53644	5.44649	6.03283	6.22672	6.23098	6.18222	6.11683
Q8BG05	3	Hnrnpa3	0.000292276	7.96883	7.53916	8.01317	7.81534	7.51313	6.50659	6.55306	6.40663	6.80365	6.47159	6.12648	6.42281	6.92266	6.67813	6.53719	6.7587	6.49252	6.37232	6.83149	6.81658
Q8BG32	4	Psmd11	1.73845e-06	7.2709	6.72583	7.25435	7.25963	6.81593	6.96588	7.15112	7.18619	6.99886	6.88194	6.76671	6.60483	6.93459	6.9159	6.97275	6.63045	6.37208	6.60483	6.61705	6.69717
Q8BG39	5	Sv2b	1.11439e-06	5.56753	4.81983	6.019	5.05394	5.77073	7.07866	7.88304	9.11883	7.8165	7.45382	8.4757	8.02634	8.70814	9.32821	9.06613	9.47118	9.41823	8.74997	9.92034	9.54365
Q8BG40	4	Katnb1	0.00286148	5.57632	5.34648	5.73114	5.70789	5.82805	5.90453	5.7008	5.81375	5.95069	6.09201	5.86533	5.96262	5.7085	5.62068	5.81669	5.90624	5.87554	5.41786	5.57299	5.51937
Q8BG51	6	Rhot1	1.77623e-07	3.7446	4.42837	4.38404	3.87382	4.28187	4.23579	3.85765	4.07936	4.1943	4.24135	4.45722	4.2405	4.7176	4.53671	4.5415	4.67317	4.68479	4.46777	5.0686	4.75408
Q8BG95	4	Ppp1r12b	0.121277	4.66787	4.7085	4.81173	5.00456	4.89376	4.79873	4.96944	5.24615	4.83692	5.16162	3.47974	3.43655	4.53819	4.5901	4.40652	4.84332	5.09433	4.13415	4.26744	4.70127
Q8BGB5	3	Limd2	0.00174627	5.56802	5.6698	5.26499	5.71526	5.45685	4.87376	5.01889	4.88328	5.06278	5.13703	5.12888	4.34629	4.94525	5.07432	5.0219	4.64699	4.82837	3.91612	4.76302	4.91019
Q8BGD5	5	Cpt1c	0.0101537	4.33477	4.37821	5.39055	5.07679	5.20953	5.81936	5.58304	5.87394	5.93869	5.96822	6.50341	6.87841	6.49253	6.54629	6.44257	6.28667	6.6249	6.65343	6.68088	6.72497
Q8BGH4	3	Reep1	4.26466e-07	7.61159	7.62496	7.33621	7.66089	7.78948	7.03189	6.75981	6.59407	7.07801	7.056	6.71101	6.45848	6.32426	6.82476	6.16073	6.06383	6.46014	6.74352	6.37472	6.32884
Q8BGQ1	1	Vipas39	0.433046	5.30491	4.59226	5.22031	5.06061	5.35869	5.38703	5.9347	6.0593	5.71622	5.2129	5.23147	4.90725	5.17621	5.38618	5.34022	5.5869	5.49914	4.84798	5.50133	5.63508
Q8BGQ7	4	Aars1	2.93147e-06	9.72512	9.78072	9.81066	9.54218	9.68186	9.79512	9.98513	9.90315	9.84025	9.82779	9.40915	9.06992	9.6382	9.3918	9.4192	9.2585	9.26154	9.19941	9.13927	9.14309
Q8BGR6	3	Arl15	0.0534028	5.03999	4.94049	4.76407	4.40331	5.38193	4.46709	4.23395	4.03091	4.35753	4.52186	4.05389	3.94223	3.71852	3.74772	3.6388	3.58537	3.7133	3.40535	3.51535	3.73616
Q8BGT6	3	Micall1	2.4079e-06	6.48724	6.73871	6.38442	6.57265	6.61418	6.31268	5.84523	5.38383	6.23777	6.41168	5.5669	5.54791	5.35121	5.56389	5.28158	4.53113	4.93204	4.82137	4.43465	4.82869
Q8BGT8	8	Phyhipl	1.82073e-06	8.27696	8.19257	8.16088	7.90076	8.11333	8.45923	8.58539	8.47352	8.47863	8.5737	8.50301	8.04183	8.5582	8.45638	8.35917	7.96222	8.08973	8.01863	8.12427	8.1323
Q8BGX2	6	Timm29	1.57575e-07	5.30526	5.27565	5.23534	5.15466	5.71577	4.91311	4.6265	4.15607	4.97677	4.80361	5.07889	5.50178	5.23529	5.25097	5.56506	5.54799	5.56729	5.72839	5.88771	5.67552
Q8BH43	6	Wasf2	0.000279911	3.52786	2.06415	4.23741	3.13869	3.7528	4.07601	3.77605	3.7914	3.48307	3.78741	4.11971	4.22558	5.13462	3.92194	4.17936	4.19378	4.12488	4.16839	4.06317	4.28452
Q8BH44	5	Coro2b	9.40036e-05	5.26356	5.76598	6.40319	6.35258	6.51344	7.05924	6.60916	6.68187	6.88092	6.77571	7.52978	7.47762	7.56032	7.50442	7.74711	7.83202	7.84009	8.12766	8.11262	8.03416
Q8BH57	1	Wdr48	0.0310865	6.36609	6.41572	6.6196	6.57604	6.76559	6.81916	6.98041	7.07556	6.92303	6.91902	6.91461	6.57717	6.88794	6.90409	6.86946	7.04634	6.9887	6.81131	6.89511	7.0127
Q8BH58	8	Tiprl	3.45016e-07	8.36942	8.02847	8.09654	7.87078	8.01258	8.23105	8.73018	8.78553	8.67812	8.17088	7.86733	7.64127	8.04216	8.10306	8.23109	8.03461	7.70688	7.53925	7.87831	7.69091
Q8BH59	6	Slc25a12	0.00056264	7.27862	7.45459	8.10176	8.13526	8.26056	8.12336	8.00023	7.98748	8.02038	8.32628	8.73281	8.66255	8.92203	8.69923	9.1029	9.92021	9.75627	9.97389	10.2031	10.1367
Q8BH60	4	Gopc	0.00108462	6.59025	6.23305	6.67503	6.28741	5.06556	6.80782	7.4255	7.51311	7.18554	7.18221	6.24735	5.31376	6.19027	6.42405	6.27645	5.80647	5.71171	5.11647	5.5194	5.77093
Q8BH66	1	Atl1	2.72683e-08	7.62368	7.91047	8.24957	7.72753	7.75543	8.84588	8.8672	8.98284	8.84978	8.98349	8.88074	8.29613	8.76781	9.06845	8.93574	8.75105	8.70529	8.49294	8.70311	8.72324
Q8BHC1	1	Rab39b	3.5789e-06	5.34884	5.38704	5.98092	5.75092	5.76119	6.21146	6.0789	6.22272	6.1229	6.14087	6.462	5.69935	6.29979	6.46008	6.34301	6.50011	6.33812	6.3388	6.52657	6.40706
Q8BHE3	1	Atcay	0.159494	5.70945	6.22119	6.2113	6.183	6.30293	6.46446	6.53931	6.62959	6.57232	6.5294	6.82185	6.11631	6.48621	6.85759	6.76055	6.85395	6.75568	6.84124	7.07755	7.0592
Q8BHG1	4	Nrdc	0.000357439	7.36411	7.27373	7.25878	6.95689	6.72643	7.19179	7.31461	7.09799	7.47576	7.34166	6.54923	6.47522	6.96256	6.82715	6.75371	5.74257	6.05509	6.03195	5.81794	5.99472
Q8BHL3	6	Tbc1d10b	0.000367179	6.51487	6.37254	6.32544	6.24194	6.45606	6.73938	6.6854	6.83901	6.87347	6.91687	6.77475	6.45172	6.98598	6.86627	6.93069	7.11817	7.32471	6.99424	7.42476	7.40056
Q8BHN3	5	Ganab	6.68209e-06	5.56368	5.76261	6.48183	6.33761	6.11246	5.88012	5.92735	6.15128	5.5656	5.76216	6.18562	6.16013	6.73476	6.37174	6.18404	6.14718	5.92453	6.09068	6.11201	6.44438
Q8BIE6	4	Frmd4a	0.505859	9.75742	9.75323	9.39467	9.30694	9.26918	9.50514	9.68258	9.37252	9.81341	9.67333	8.56932	8.31289	8.32453	8.52177	8.003	6.51975	6.92047	6.66558	6.22803	6.67533
Q8BIF0	3	Cd99l2	0.385962	4.70241	4.49701	4.30655	4.97481	4.56307	4.19911	4.55136	4.33449	4.47335	4.34481	4.48373	3.85137	4.35399	4.55622	4.62269	4.29561	4.17375	4.23649	4.20403	4.34033
Q8BIF2	3	Rbfox3	2.38464e-10	3.57567	3.2885	2.56494	3.39044	3.51343	2.46232	2.99448	2.72552	2.77716	2.96227	2.82671	2.69426	3.15822	2.80772	2.6661	1.87164	2.17759	2.27022	3.01111	2.89722
Q8BIG7	6	Comtd1	0.10831	5.34304	5.76924	5.70447	5.38775	5.65296	5.81665	5.79981	5.83805	5.87697	5.78779	5.91408	5.75294	6.08075	5.98362	6.11006	6.14876	5.98236	6.19439	6.74954	6.44246
Q8BIK4	8	Dock9	0.0195267	8.05107	8.55296	8.60857	8.25345	7.86368	9.4572	9.76758	9.819	9.87987	9.77478	9.17093	8.30463	9.00977	9.24975	8.86391	8.50124	8.36519	8.23236	8.51623	8.54101
Q8BIW1	4	Prune1	0.000289649	7.35798	7.22416	7.3441	6.96202	7.34273	7.60598	7.6146	7.42815	7.65375	7.7452	6.90614	6.65027	6.41529	6.74976	6.57903	5.91138	5.9877	6.1114	5.70069	5.74661
Q8BIZ1	5	Anks1b	2.14113e-06	7.49016	6.9744	7.49304	7.0884	7.37469	8.25786	8.41766	8.67522	8.33182	8.37867	8.48724	8.5046	8.90532	8.6162	8.90335	8.87354	8.65182	8.39574	9.00741	8.99554
Q8BJ42	5	Dlgap2	2.31065e-09	3.22129	4.03158	5.32593	4.20533	4.47204	6.50852	6.18118	6.94454	6.50172	6.69795	7.28266	7.54603	7.49344	7.46227	7.38446	6.8722	7.06735	6.64948	7.17568	7.18714
Q8BJ71	3	Nup93	1.39172e-07	4.65038	4.92657	5.03246	4.41011	3.86019	3.90326	3.81894	3.68915	4.41475	4.18851	3.93346	3.68813	4.13259	3.36965	3.17195	3.24081	3.37662	3.52216	4.21053	3.6979
Q8BJH1	3	Zc2hc1a	6.75743e-08	9.55586	9.45439	9.54178	9.48669	9.6453	9.44579	9.45118	9.22189	9.78859	9.80535	8.99051	8.98793	9.133	9.20833	8.96161	8.28832	8.4391	8.47381	8.33321	8.5548
Q8BJI1	5	Slc6a17	0.00547198	4.99416	5.10882	6.04898	5.90585	5.76398	7.21898	7.17333	7.83959	7.3894	7.47709	8.34244	8.13479	8.21468	8.52826	8.45457	8.52523	8.61269	8.5276	8.59932	8.65616
Q8BJU0	3	Sgta	3.73671e-08	6.30035	6.25326	6.4796	6.0616	6.52253	6.19997	5.76148	5.64356	5.98429	6.22669	5.84632	6.39189	5.67259	5.65637	5.52178	5.2552	5.30524	5.67748	5.23424	5.27893
Q8BJW6	3	Eif2a	1.93846e-09	3.78605	4.47787	4.21572	3.83961	4.22515	3.78171	3.40358	3.34223	3.59101	3.63496	3.18372	2.81861	3.59204	3.21931	3.44628	3.43337	3.09587	3.47313	2.8259	3.1695
Q8BJY1	4	Psmd5	0.00025748	6.67595	5.5986	6.2132	6.24886	5.94176	6.03864	6.46697	6.32398	6.046	6.12789	5.74195	5.0473	6.08521	5.85084	5.91249	6.0065	6.14354	5.49918	6.15123	6.22971
Q8BK08	6	Tmem11	0.00027163	7.45113	7.63621	7.54791	7.42121	7.31656	7.31742	7.5296	7.91873	7.86846	7.45695	7.63326	7.22081	8.19442	8.35075	8.11144	8.65734	8.58757	8.59279	9.08631	8.76678
Q8BK63	3	Csnk1a1	0.168719	4.05941	4.44168	4.69774	4.53921	4.83729	4.53254	4.56481	4.59956	4.61727	4.51972	3.83448	3.44293	4.0159	3.88031	4.21955	3.63692	3.34001	4.09371	3.82306	3.53011
Q8BK64	8	Ahsa1	3.67434e-05	6.59116	6.30653	6.42777	6.05707	5.53651	6.43371	6.85681	6.82643	6.72492	6.59943	6.17485	5.64173	6.57093	6.50069	6.51251	6.49653	6.1885	5.69421	6.54648	6.30457
Q8BK67	3	Rcc2	9.35135e-05	7.901	7.77727	7.79813	8.30212	7.90962	6.41113	6.12492	6.07456	6.46969	6.43901	6.45253	6.79046	6.49011	5.94935	6.28469	6.30308	6.27728	6.5493	6.43731	6.53437
Q8BKC5	3	Ipo5	0.132749	7.86652	7.92156	7.99893	7.89741	7.86788	7.64633	7.67833	7.66807	7.78571	7.67363	7.59974	7.54826	7.41572	7.60855	7.53539	7.45751	7.68077	7.51836	7.66043	7.5703
Q8BKI2	2	Tnrc6b	3.03891e-08	6.04628	5.98141	6.2353	6.19448	6.3221	6.97536	6.75416	7.13211	7.07627	7.32875	6.99184	7.06395	7.22011	7.19194	7.04165	5.9958	6.41549	6.29828	6.05863	6.14166
Q8BKX1	5	Baiap2	4.80955e-06	7.84144	7.82352	8.60498	8.30167	8.16837	9.48343	9.65685	10.0834	9.50941	9.59347	10.1733	9.76668	10.4072	10.3394	10.435	10.6251	10.5602	10.0178	10.5454	10.5137
Q8BKZ9	6	Pdhx	9.00105e-08	5.53473	5.19422	6.53327	6.26427	6.18889	6.40909	6.21528	6.03313	5.77168	6.16087	6.71956	6.17402	6.52036	6.08157	6.93779	7.64847	6.98852	6.98536	7.37289	7.47407
Q8BL48	4	Unk	1.75531e-08	5.35335	5.78529	5.43611	5.41585	5.75953	5.61303	5.35078	5.25493	5.36893	5.47768	5.35285	4.97716	4.97476	5.07593	4.94989	4.60513	4.78188	4.4485	4.66241	4.65512
Q8BL65	5	Ablim2	0.000319333	6.06834	5.76868	7.09332	6.01951	6.09277	7.32028	7.36369	7.91522	7.55135	7.4695	7.69318	7.99227	8.18874	7.96299	8.22817	8.27449	8.42132	7.99209	8.43413	8.39815
Q8BL66	6	Eea1	1.48488e-06	6.01806	6.02923	6.75839	6.43663	6.88006	6.73645	6.63279	6.83862	6.68499	6.74564	7.26779	7.51119	7.47111	7.31706	7.47153	8.01843	8.15	7.72271	7.98783	8.14595
Q8BL86	4	Mblac2	2.89331e-07	6.4765	6.43575	6.63947	6.52315	6.53219	6.4384	6.54979	6.09841	6.26129	6.2848	5.91424	5.54047	5.72163	5.72235	5.95431	5.59108	5.32972	5.34856	5.60417	5.794
Q8BLE7	8	Slc17a6	1.56237e-07	5.71932	5.77824	5.61125	5.81	6.09205	6.16821	6.54837	7.10909	6.49929	6.75513	6.19591	5.82199	6.35009	6.53143	6.33273	6.41128	6.06133	5.97314	6.41116	6.39185
Q8BLF1	5	Nceh1	3.41563e-07	3.42749	2.76093	4.27639	3.48616	2.73532	4.79885	4.31445	4.13758	4.67226	4.2871	4.83916	4.87685	5.03947	5.21653	5.28269	5.17962	5.0075	5.32909	5.56456	5.54728
Q8BLK3	5	Lsamp	0.00210832	8.20123	8.29369	8.72748	8.78994	8.83266	9.38459	8.99229	8.87255	8.97033	9.19782	9.70492	9.44795	9.5967	9.27355	9.93321	9.86867	9.46323	9.85195	10.0509	10.0807
Q8BLK9	8	Rps6kc1	4.4064e-06	4.85957	5.06404	4.60289	4.68972	4.66327	4.87037	4.85678	5.29191	5.27775	5.0402	4.87323	4.43738	5.03569	4.83701	4.98424	4.8572	4.5128	4.60446	4.52298	4.63855
Q8BLN5	4	Lss	5.88071e-06	6.36126	6.29496	5.85966	6.04577	6.19184	5.58835	5.49585	4.88274	5.20251	5.08359	4.39878	3.89131	4.29009	4.0842	3.95668	2.62872	2.26897	2.76947	2.73725	2.63407
Q8BLQ9	1	Cadm2	0.0244048	5.50129	5.08724	6.02917	5.78571	5.11524	6.49312	7.08603	7.48198	6.75897	6.44824	6.60847	5.71244	6.92619	6.92304	7.14893	7.37915	7.0798	6.91586	7.47942	7.19121
Q8BLR2	8	Cpne4	1.62509e-10	7.79831	7.92249	7.72807	7.74469	7.90297	8.63376	8.78985	8.69282	8.77105	8.57283	8.11224	8.13793	7.87937	8.29331	7.78664	7.49436	7.8194	7.6892	7.78162	7.80548
Q8BM65	5	Nyap2	1.30091e-07	6.32427	6.1798	6.89097	7.02786	7.08112	8.10901	8.13507	8.67823	8.41259	8.5369	8.55824	8.67794	8.61037	8.90941	8.81448	7.82706	8.20234	7.91777	7.90166	8.00903
Q8BM85	4	Tbck	0.92453	6.19235	6.44378	6.39727	6.2212	6.60703	6.55669	6.18291	6.26036	6.49421	6.62511	6.46788	6.27084	6.02462	6.2684	5.99161	5.71328	5.92293	5.81098	5.63347	5.8863
Q8BMA6	3	Srp68	6.92908e-08	4.73228	4.72526	4.71938	5.06331	5.25995	3.88266	3.63651	3.073	3.78821	3.92866	3.39298	4.36387	3.78477	3.68352	3.59713	3.13448	3.97219	3.94177	3.54514	3.66118
Q8BMF3	5	Me3	0.000187121	4.7565	4.05932	4.98057	4.16372	3.75918	5.56051	5.49928	6.07575	5.60378	5.74832	6.1661	6.24151	6.96434	6.49352	7.63333	7.95973	6.9436	6.75144	7.91519	7.8815
Q8BMG7	5	Rab3gap2	6.00599e-05	4.57269	4.03152	4.44309	4.26615	4.0936	4.6497	4.42229	4.67924	4.66852	4.92966	5.09971	5.3345	5.19691	5.30351	5.32377	5.15106	5.41343	5.79851	5.38522	5.42678
Q8BMJ2	3	Lars1	8.35647e-07	5.4592	5.64255	5.78585	5.9197	5.89921	4.89827	5.65663	5.78208	5.15991	5.3909	4.68978	3.92873	4.94918	4.79254	4.73366	5.01724	5.18481	4.68583	4.55662	4.73958
Q8BMJ3	3	Eif1ax	6.15558e-07	7.60825	7.50311	7.06067	7.62335	7.39742	5.906	5.49761	5.34315	6.07252	6.0489	5.36771	6.15363	5.84636	5.47585	5.67565	5.61538	5.84647	5.47586	5.14865	5.52201
Q8BMK4	3	Ckap4	0.000216878	5.28422	4.89668	5.73302	6.02283	5.93758	4.72128	4.49725	4.33633	4.05293	4.61862	4.503	3.7361	4.69223	4.19538	4.0141	3.52627	3.38267	3.35404	2.4648	3.23262
Q8BMS1	6	Hadha	1.42641e-07	6.82634	6.76722	7.57456	7.28271	7.00589	7.26382	7.02469	7.24631	6.95113	7.14218	7.38507	7.30478	7.5281	7.39855	7.84116	7.75381	7.514	7.65612	7.91523	7.88333
Q8BNA6	4	Fat3	1.95079e-06	4.24104	4.90121	4.27287	3.64661	4.63906	5.00543	4.91395	5.02945	5.38572	5.18465	5.03614	4.12054	4.24309	4.62805	4.34025	3.19973	3.29818	3.05079	2.9731	2.37882
Q8BNU0	4	Armc6	0.00108913	4.5532	4.13131	4.8506	4.73991	4.05411	4.66632	4.18129	4.22451	4.23201	3.69956	4.04402	3.98214	3.74465	3.80458	3.9253	3.19643	3.27492	3.84547	3.46718	3.80489
Q8BNY6	8	Ncs1	2.12113e-06	5.97651	5.55605	5.76242	5.38801	4.75399	5.0459	6.44332	6.48393	6.30534	6.04743	4.81042	3.55778	5.51343	5.43205	5.29393	5.55497	4.93974	4.9484	5.16123	5.12965
Q8BP47	8	NARS1	0.00112094	8.76142	8.62485	8.80195	8.68582	8.70657	8.55851	9.03825	9.23399	9.01178	8.82789	8.42682	8.32339	8.70597	8.52533	8.70397	8.66017	8.49329	8.25599	8.62673	8.60408
Q8BP48	3	Metap1	0.0352758	6.57222	6.83078	6.6364	6.77568	6.92463	6.08547	5.72708	5.28064	6.10435	6.10051	4.93739	5.0945	5.03327	4.61276	4.5817	3.97472	4.5353	4.85762	4.04354	4.46515
Q8BP67	3	Rpl24	0.00871168	7.17879	6.85953	6.38935	7.56183	7.47288	5.29939	5.5365	5.74432	5.87708	5.72323	5.29829	6.48748	6.21138	6.07759	6.00066	5.68061	6.00715	6.01887	5.46774	5.8177
Q8BPM0	4	Daam1	2.72683e-08	7.4624	7.42575	7.30392	7.42463	7.73541	7.47857	7.37203	7.32299	7.57321	7.50199	7.16065	6.96678	6.82912	7.06426	6.9465	7.02021	6.97636	6.76158	6.8162	6.907
Q8BPN8	5	Dmxl2	7.51116e-05	9.48183	9.74693	10.0966	9.82329	9.74787	11.0251	11.3654	11.8886	11.2898	11.3592	11.6057	11.2253	11.6999	12.0328	11.8758	11.9502	12.0416	11.7048	12.1612	12.0349
Q8BPQ7	5	Sgsm1	3.15802e-06	4.84835	5.2047	5.71867	6.08949	5.38172	6.66184	6.38504	6.60296	6.85786	6.80899	7.21091	7.52062	6.85544	7.12121	7.08706	7.03919	7.18523	7.1969	6.9308	7.00376
Q8BQP9	5	Rgs7bp	1.66583e-08	3.44359	3.31071	5.33731	4.27326	3.77878	6.20495	6.23478	6.69917	6.13157	6.1477	6.93934	6.4537	7.49787	7.45876	7.46309	7.64524	7.45546	7.44883	7.89067	7.71563
Q8BR63	3	Fam177a1	6.73389e-07	4.94715	4.91867	4.72775	4.88933	4.86283	4.38634	4.2818	3.35058	4.55988	4.75481	4.03976	4.27668	3.54729	3.91782	3.84016	3.00692	3.23527	3.71463	3.19094	3.87055
Q8BR86	2	Kirrel3	9.71e-08	2.95746	3.41574	3.33208	3.76681	3.60191	4.36041	4.02915	3.86661	3.90098	3.97289	4.34398	4.38859	3.51803	4.10428	3.73822	3.21161	3.16908	2.92528	2.697	3.19899
Q8BR92	8	Palm2	0.000124151	8.85832	8.57971	8.76495	8.70159	8.73978	8.93812	9.01902	9.28754	9.17206	9.18679	8.69355	8.56226	8.76219	8.84694	8.75477	8.84892	8.85673	8.54868	8.77867	8.62238
Q8BRK8	5	Prkaa2	0.000152242	4.50398	4.24767	4.26502	3.99717	4.79655	4.83025	4.69362	4.74668	5.1835	5.27671	5.05603	4.72333	4.99021	5.20921	5.12465	4.70409	4.56043	4.99785	4.99568	5.10434
Q8BRT1	4	Clasp2	0.000266807	10.4266	10.4478	10.5852	10.4873	10.5369	10.9705	11.1044	11.205	11.2901	11.2562	10.7093	10.4473	10.5778	10.8555	10.5436	9.78159	10.0951	9.82711	9.89	9.88048
Q8BRV5	5	Kiaa1671	0.00384741	4.23762	4.78281	5.8719	5.98261	5.78473	7.15931	6.73519	6.99975	7.13869	7.27568	7.56997	8.04016	7.28962	7.7149	7.67299	7.54378	7.74051	7.75593	7.65143	7.61806
Q8BSS9	4	Ppfia2	5.49144e-09	8.86301	8.97457	8.78565	8.62097	8.95845	8.9852	8.8517	8.83838	9.11591	9.23866	8.79128	8.73465	8.32097	8.61114	8.38441	7.82989	8.15388	7.90461	7.90341	8.02095
Q8BSY0	5	Asph	1.29105e-06	3.34986	4.43503	5.03251	5.06709	4.74132	5.45772	5.6135	6.08646	5.20416	5.14221	6.29291	5.89535	7.14629	6.6677	6.05173	5.25589	5.76811	5.54244	5.5618	5.52535
Q8BTG7	4	Ndrg4	5.98604e-07	4.20687	4.85463	5.15137	4.66486	4.83009	5.02798	4.96121	4.72593	5.24345	5.38001	4.04591	4.65222	4.6949	4.46381	4.69542	3.93941	4.50794	4.19781	4.12905	4.23307
Q8BTI8	3	Srrm2	0.000265671	8.24031	8.07979	7.84525	8.35913	8.18141	6.88258	7.03863	6.90552	7.26391	7.21011	6.66577	6.91676	7.07522	7.2375	7.16761	6.90062	6.70588	6.94358	6.90801	6.99266
Q8BTU1	3	Cfap20	0.00155932	6.56201	6.79703	6.26992	6.68874	6.62757	5.67981	5.41485	5.17297	5.69217	5.59707	5.26238	5.08414	5.29335	5.38186	4.91023	4.5901	4.72393	5.09146	4.86409	4.69029
Q8BTX9	3	Hsdl1	1.09572e-07	8.18696	8.00197	7.90569	8.23265	7.92094	7.69234	7.8903	7.5212	7.63041	7.56445	7.56441	6.82934	7.48859	7.33804	7.53979	7.59489	7.08831	7.35515	7.65787	7.59383
Q8BU30	3	Iars1	1.45135e-08	4.6548	5.18612	4.38267	4.91365	4.81286	3.90419	3.68509	3.89628	4.05571	4.19104	3.77074	4.03864	4.23306	4.08742	3.71136	3.13081	3.56475	3.61702	3.7553	3.37832
Q8BUK6	7	Hook3	0.000969088	2.93359	3.72974	4.04783	3.71702	3.65253	3.14936	3.01688	3.04212	2.99224	3.4422	3.37366	3.49759	3.64236	2.9613	3.29271	3.66361	3.7572	3.96284	3.52703	3.76588
Q8BUM9	4	Usp43	6.50624e-06	3.43392	4.72501	4.04271	3.62519	3.62665	4.44985	4.19479	3.9067	4.44655	4.58962	4.10661	4.71476	4.07951	4.26296	4.01633	3.18881	3.8279	2.84184	3.20832	3.47424
Q8BUV3	5	Gphn	0.0150211	8.58099	8.32538	8.48945	8.54614	8.44115	8.94704	8.84974	8.86458	9.04395	9.02202	8.76299	8.95439	8.93258	8.86783	8.97021	8.71313	8.892	8.63692	8.86712	8.85467
Q8BVE3	5	Atp6v1h	0.00301958	7.29659	7.21007	7.95108	7.75384	7.75303	8.54022	8.24511	8.59305	8.65941	8.66923	9.07539	9.29379	9.00917	9.13513	9.18738	9.44104	9.56999	9.49333	9.66545	9.61742
Q8BVI4	6	Qdpr	9.28109e-06	6.73013	6.721	6.71224	6.61312	6.62867	6.60189	6.86002	6.71567	6.5626	6.88452	6.53084	6.33865	6.93468	6.80799	7.2786	7.81681	7.56027	7.43389	8.01409	7.97047
Q8BVL9	3	Jakmip1	4.77392e-09	5.53992	5.79896	5.97377	6.48061	6.48666	5.7584	5.40665	5.44105	6.23504	6.19822	5.64609	5.80371	5.81868	5.75313	5.80377	5.81151	5.94467	5.70857	5.29307	5.70543
Q8BW75	6	Maob	8.40302e-06	4.83941	5.11131	4.85527	4.55714	5.46314	5.06638	5.32648	5.49186	5.13095	4.89619	5.04479	5.08407	5.4128	5.39282	5.76219	6.0196	5.79852	5.71315	6.7153	6.64578
Q8BW96	8	Camk1d	0.339895	4.08364	5.08895	4.97062	4.34351	3.7013	5.54373	5.29069	5.3009	5.52647	5.51426	4.94722	4.88654	5.18618	4.97103	4.95041	4.95003	5.03829	4.73754	4.8664	4.80657
Q8BWF0	6	Aldh5a1	0.00039784	7.89952	7.68903	8.37808	8.25196	8.33941	8.32321	8.22735	8.1504	7.91557	8.15202	8.6767	8.6683	8.86421	8.55431	9.25031	9.602	8.8582	9.05192	9.59246	9.6289
Q8BWG8	1	Arrb1	0.00174456	5.23996	5.49056	5.78275	5.39291	4.98308	5.74131	5.5323	5.36782	5.72972	5.60705	5.22466	5.17651	5.31629	5.26224	5.2859	5.78275	5.7555	5.20516	5.6947	5.72971
Q8BWS5	2	Gprin3	0.0372516	7.07097	7.08764	6.99931	6.63333	6.48889	7.68003	7.52128	7.46828	7.62186	7.72437	7.45644	7.50122	8.14336	7.47675	7.82868	6.96597	6.94589	6.785	7.13771	7.04509
Q8BWT5	4	Dip2a	3.8482e-05	7.68124	8.00654	7.6286	7.5418	7.60988	7.66109	7.66155	7.4149	7.74636	7.71824	7.37661	6.81713	7.27105	7.1656	7.08143	7.04765	7.16827	7.15494	7.17664	7.18025
Q8BWW4	3	Larp4	0.238032	6.34386	6.39459	6.5025	6.59922	6.48778	5.922	5.46174	5.26219	5.74777	5.98937	5.09911	5.54719	5.68944	5.18826	5.30772	4.75413	4.90067	5.04753	5.14652	5.1165
Q8BWY3	8	Etf1	3.68082e-05	7.02269	6.32526	6.94738	6.72639	5.24415	6.71771	7.05097	6.84366	6.65869	6.39158	5.95566	5.13182	6.66745	6.12005	6.44017	6.29111	5.65884	5.32179	5.82037	5.65836
Q8BWZ3	2	Naa25	4.11662e-07	2.57016	4.2153	4.42025	4.13263	4.51936	4.38446	3.95083	3.71335	3.93317	4.00861	3.96098	4.25084	3.82558	3.34641	3.35672	2.96148	3.56191	3.4871	3.20621	3.13519
Q8BX10	3	Pgam5	0.0456966	7.64251	7.53672	7.83757	8.11399	8.26619	7.57978	7.13943	7.02833	7.27535	7.44185	7.15592	7.38024	7.30144	6.93565	7.39752	6.63805	6.38837	6.58866	6.43577	6.73909
Q8BX70	5	Vps13c	0.10782	6.21873	6.22894	6.50518	6.22897	5.90845	7.27917	7.26382	7.91113	7.38212	7.44277	7.99492	7.63061	8.18443	8.33393	8.37801	8.60599	8.54623	8.3563	8.98002	8.75272
Q8BXK8	3	Agap1	2.98061e-06	5.759	5.77128	4.90571	4.94968	4.76777	5.55156	5.39582	5.10162	5.44169	5.50874	4.80157	5.13035	5.12715	4.94165	4.81129	4.31174	4.50802	4.69044	4.60534	4.5629
Q8BXR9	5	Osbpl6	7.77035e-09	7.51257	7.77941	7.80612	7.6639	7.81886	8.12913	7.92787	7.90553	8.18167	8.36209	8.29182	8.69375	8.35275	8.26293	8.38345	8.10114	8.42739	8.35055	8.32316	8.30589
Q8BXT1	5	Rgs8	0.00153085	4.48241	4.44714	5.15763	5.07747	5.32493	5.32974	5.00999	4.92433	5.02609	4.84447	6.05741	6.4771	5.71025	5.87633	5.77883	6.0038	6.18836	6.39226	6.18482	6.10877
Q8BXV2	3	Bri3bp	3.52679e-05	6.5452	6.56229	6.38042	6.85737	6.39447	5.83749	5.67359	5.75809	5.93454	5.71847	5.49334	5.0605	5.74181	6.00531	5.52223	5.84425	5.8266	6.2602	5.95901	5.9145
Q8BY87	4	Usp47	4.34676e-06	9.52923	9.3579	8.99701	9.09608	9.12099	8.92117	8.94994	8.64104	9.02842	8.93001	8.50996	8.20918	8.43462	8.27295	8.09111	7.76233	8.11355	7.82498	7.67133	7.80701
Q8BYA0	4	Tbcd	4.7193e-05	6.30335	6.63387	6.29972	6.0301	5.85048	6.44588	6.19759	5.89629	6.46245	6.26109	5.82352	5.71789	5.85698	5.91003	5.78556	4.92874	5.40159	5.22824	5.10641	5.21384
Q8BYK6	4	Ythdf3	4.2671e-08	8.24728	8.10676	7.9802	8.15269	7.86093	7.78197	7.69465	7.51262	7.81973	7.8079	7.7446	7.32421	7.77596	7.61102	7.47385	6.94033	7.05928	7.25038	7.22191	7.18539
Q8BYN5	4	Fsd1l	3.28965e-06	7.13371	7.27749	7.19882	6.77983	6.65384	7.14133	7.06006	6.65541	7.12806	7.21211	6.47475	6.0654	6.23024	6.19089	6.21676	5.8488	5.72418	5.48152	5.60596	5.74431
Q8BZ05	5	Arap2	1.38065e-06	3.46656	2.82975	3.88642	1.84136	3.10773	4.09218	3.9602	3.9177	4.45022	4.45736	4.13744	4.59082	4.42795	4.1197	4.33032	2.92821	3.91778	4.00944	4.12272	4.08218
Q8BZ98	6	Dnm3	1.06521e-07	8.23833	8.23216	7.96514	8.03237	8.05022	8.16289	8.21906	8.31224	8.27463	8.23894	8.11529	7.71409	8.45058	8.3469	8.3295	8.86816	8.89845	8.70694	9.14968	9.03109
Q8C015	4	Pak5	1.51762e-05	8.32	8.38997	8.28796	8.29802	8.35088	8.37203	8.30277	8.15918	8.53377	8.68849	8.07399	8.18273	7.72855	8.02764	7.99513	8.0958	8.38284	8.26966	8.20436	8.25964
Q8C050	3	Rps6ka5	0.373425	4.53907	4.42449	4.84494	5.19982	4.81068	3.93272	3.944	3.46697	3.66173	3.89339	3.4543	3.33311	2.7381	3.65755	2.40126	3.48059	2.88614	2.79759	3.42133	2.16168
Q8C052	3	Map1s	0.00311492	6.2975	6.70184	6.27367	6.44461	6.16492	6.35317	6.20324	6.02861	6.54086	6.51973	6.11163	6.1537	6.04883	6.20099	5.98178	5.65434	5.72617	5.6653	5.40853	5.87473
Q8C078	5	Camkk2	2.95841e-05	6.43966	6.56708	7.30026	6.70924	6.70267	8.01464	8.01278	8.1728	8.17887	8.25102	8.15549	8.25847	8.23823	8.35942	8.52709	8.26894	8.40243	7.95697	8.02222	7.94466
Q8C079	3	Strip1	6.46871e-05	4.8434	5.51402	5.34049	5.54418	5.63897	5.21547	4.84637	5.11003	5.14903	5.33222	5.1126	5.38468	4.88168	5.14293	5.11331	5.25801	4.86402	5.04985	4.81106	4.98663
Q8C080	3	Snx16	5.74474e-08	6.20321	6.34133	6.23609	6.29005	6.46727	6.27902	5.96376	5.61227	6.26471	6.28311	5.52547	5.46503	5.37044	5.26387	5.15805	4.73757	4.95758	5.19618	4.87257	4.85235
Q8C0D4	4	Arhgap12	7.25802e-08	5.28753	4.77823	5.45919	4.96791	5.27671	5.06006	5.3311	4.93286	5.2795	5.38894	4.64548	4.81189	4.76128	4.68169	4.89854	4.69308	4.90221	4.63954	4.54836	4.68904
Q8C0D5	2	Efl1	0.293011	5.5039	6.55987	6.29054	6.02822	6.50102	6.52604	6.05738	6.2547	6.48156	6.44494	6.51889	6.47399	6.16016	6.34936	6.19409	5.81021	6.08651	6.19267	5.81257	5.82729
Q8C0E2	1	Vps26b	0.000998848	7.11908	7.21444	7.22827	7.33766	6.88076	7.53379	7.63401	7.59314	7.59818	7.52178	7.49363	7.0945	7.52064	7.62279	7.49979	7.32256	7.27983	7.33598	7.50081	7.37873
Q8C0L0	4	Tmx4	0.101585	5.47708	4.80429	5.42902	5.30822	4.95519	4.82266	5.34776	5.27776	5.10522	4.94509	4.40675	3.90799	4.75501	4.69743	4.91519	4.5377	4.40625	4.76415	4.79857	4.42309
Q8C0M9	1	Asrgl1	0.00280946	6.11181	6.11168	6.0852	6.12792	6.39544	6.20326	6.53933	6.6895	6.48984	6.60963	6.37752	6.06175	7.13817	6.69706	6.64268	6.83457	6.5751	6.77458	6.39264	6.45485
Q8C0T5	5	Sipa1l1	0.00408022	6.962	7.22519	7.78883	7.38556	7.66927	8.51352	8.43045	8.69487	8.57615	8.6934	8.86631	9.0021	9.03938	8.98808	8.95999	8.643	8.92232	8.69264	8.84347	8.93029
Q8C170	3	Myo9a	0.0518553	6.47296	6.52256	6.11344	5.93831	5.95873	6.1315	5.82412	5.7052	6.39118	6.4474	5.71159	6.04054	5.83616	5.95982	5.65711	5.0239	5.84155	5.78247	5.63069	5.58261
Q8C1A5	2	Thop1	2.09059e-08	7.69965	7.69397	8.33652	8.09377	8.28809	8.62969	8.32602	8.42679	8.71798	8.89767	8.7502	9.15825	8.83188	8.95039	8.94788	8.35778	8.26226	8.45334	8.31931	8.329
Q8C1B1	5	Camsap2	0.0153834	8.5615	8.67532	8.8067	8.72604	8.49404	9.09221	9.03862	9.14998	9.30009	9.41979	9.07774	9.0813	9.25397	9.2014	9.16306	8.855	9.30374	9.02126	9.07949	9.17782
Q8C1B7	5	Septin11	6.73267e-05	5.81563	5.31191	7.02898	6.39307	6.12466	7.42142	7.73604	8.15148	7.68147	7.6385	8.53331	8.10252	8.63586	8.58926	8.8863	9.33451	9.32268	9.03705	9.45498	9.2711
Q8C2Q3	3	Rbm14	6.00345e-05	6.66598	6.97671	6.55844	7.16559	7.0839	5.51862	5.22937	4.79006	5.40835	5.5818	4.81807	5.46246	5.22577	5.07858	5.26526	4.54043	4.48238	4.62752	4.8676	5.13237
Q8C3W1	4	NA	3.64814e-08	5.73363	5.99544	5.5652	5.4777	5.6346	5.20122	5.73579	5.61296	6.02773	5.72796	5.18881	5.43513	5.1312	5.51065	5.34499	4.71745	5.13472	4.40664	4.90486	4.76485
Q8C419	5	Gpr158	4.84215e-08	3.3531	3.66383	7.34222	6.80159	7.21885	9.49875	9.51373	10.5336	9.36018	9.37326	10.9775	11.0634	10.6887	10.8232	10.8146	11.3017	11.545	11.2919	11.1199	10.929
Q8C437	5	Pex5l	9.94504e-05	4.53	3.92561	5.50608	4.76304	5.02682	6.32171	6.16956	6.58128	6.50378	6.33403	6.56726	7.14698	6.6869	6.7155	7.14322	6.93277	7.14023	7.09836	7.03044	6.89577
Q8C522	6	Endod1	2.25405e-06	4.00512	5.69748	5.12948	5.27739	5.8602	5.22885	4.73688	4.99938	5.29775	5.20387	5.71492	6.11851	5.75184	5.93823	5.95202	6.16735	6.26005	6.47044	6.49259	6.41111
Q8C561	5	Lmbrd2	1.77322e-07	4.98261	5.55531	5.35267	5.87267	5.54016	5.90764	5.83733	5.71306	6.02834	6.00535	6.00219	5.75537	5.91064	6.03494	5.82118	5.9295	5.97446	5.98024	6.13629	5.97921
Q8C570	4	Rae1	0.000459833	5.97608	5.5852	5.80096	5.58225	5.5713	5.42929	5.71738	5.42736	5.85126	5.59057	5.22244	4.83086	4.79133	4.952	4.97736	4.87973	4.63212	4.51233	4.68063	4.56256
Q8C5H8	6	Nadk2	0.00223631	4.88565	4.17434	4.64509	5.10111	4.56312	4.43612	4.40012	4.21879	4.00695	4.01515	4.35908	4.26789	4.04292	3.75611	4.80723	5.0747	4.45003	4.45864	5.16905	5.18428
Q8C6G8	1	Wdr26	2.3933e-07	5.39344	5.62362	5.97452	5.64311	5.5422	6.28822	6.521	6.46623	6.44682	6.47634	6.38092	6.30107	6.59338	6.64232	6.65081	6.4217	6.30833	6.14697	6.33367	6.43139
Q8C754	5	Vps52	0.0216374	5.75132	6.45547	6.54907	6.56776	6.74424	6.76413	6.34998	6.40845	6.50537	6.77971	6.82368	7.03112	6.62918	6.74871	6.64249	6.64739	6.89694	6.77109	6.82937	6.82508
Q8C7M3	5	Trim9	9.46065e-07	4.85163	4.35921	7.14514	6.66984	6.48623	8.28671	8.02495	8.93888	8.00582	8.13136	9.67178	9.90891	9.32565	9.49336	9.64729	9.43711	9.72164	9.43043	9.44552	9.41859
Q8C7R4	1	Uba6	0.0716847	7.71452	7.39214	7.63874	7.26213	7.36835	7.64675	7.8053	7.95289	7.90994	7.75442	7.50529	7.66152	7.92814	7.81619	7.79885	7.64371	7.73147	7.58172	7.81445	7.69708
Q8C878	7	Uba3	0.0157767	5.99037	6.29758	6.63752	6.20994	6.49591	6.20717	5.79187	5.58055	6.171	6.2937	5.82126	5.97105	6.19482	5.8485	6.18073	6.3107	6.36927	6.50972	6.45356	6.47879
Q8C8N2	5	Scai	0.508401	6.42562	5.78647	6.50708	6.23603	6.25921	6.97005	6.89464	7.53699	7.4356	7.05433	7.42148	7.38072	7.45775	7.81071	7.94496	8.02086	8.06899	7.5743	8.59602	8.19998
Q8C8R3	2	Ank2	0.0173681	12.9203	13.1141	13.057	13.0156	12.7952	13.5699	13.5832	13.6649	13.9678	13.9431	13.5605	13.591	13.4244	13.7309	13.4775	12.9753	13.308	13.0336	13.2057	13.1583
Q8C996	2	Tmem163	1.1198e-06	2.55762	3.6757	3.01334	3.42606	3.76994	4.12198	3.13428	2.93198	3.40885	3.80219	3.97778	3.9402	3.74993	4.0276	3.81391	3.53005	2.91713	3.22945	3.51831	3.85658
Q8CA95	5	Pde10a	2.47648e-06	8.44695	8.29413	7.83412	7.59852	7.54165	8.62428	8.81402	8.88877	7.94831	7.9668	9.0348	8.63401	9.52939	8.49938	8.68207	9.35609	9.26851	9.45553	8.95644	8.68908
Q8CAA7	5	Pgm2l1	0.131054	7.52222	7.98096	8.27055	7.94065	7.62388	8.65963	8.6926	9.06352	8.95139	8.92922	9.06417	9.09927	9.31737	9.53232	9.42937	9.25058	9.35118	9.14377	9.60116	9.48472
Q8CAQ8	6	Immt	0.00185521	9.46033	9.14458	9.77154	9.65736	9.53279	9.52533	9.75678	9.86605	9.41588	9.62739	10.0285	9.84418	10.3737	10.125	10.5353	11.0926	10.767	10.6545	11.1144	11.0788
Q8CAY6	4	Acat2	1.48156e-07	6.92948	6.05154	6.66366	6.45827	6.42908	5.64198	6.42487	6.49004	6.04472	5.773	5.11229	4.95545	5.34445	5.21295	5.49041	4.62579	4.70355	4.11462	4.57272	4.51072
Q8CBW3	5	Abi1	1.93788e-07	7.65487	7.61751	7.71994	7.60089	7.61682	8.24895	7.9416	8.11932	8.27248	8.47852	8.14282	8.56978	8.23181	8.23246	8.28781	8.16852	8.38887	8.21726	8.60327	8.54717
Q8CBX0	2	Tmem63c	0.351457	2.12134	2.77998	2.09712	2.45503	1.57254	2.7653	2.56614	2.54064	2.8102	3.26973	3.06513	2.9159	2.93806	2.96835	2.85876	2.47245	2.25462	2.20334	3.04573	2.75727
Q8CBY8	4	Dctn4	1.75243e-05	7.5741	7.66832	7.56266	7.66429	7.57606	7.70914	7.75585	7.72845	7.73213	7.82124	7.45309	7.3036	7.56758	7.51699	7.60226	7.49396	7.47174	7.42859	7.61418	7.55962
Q8CC35	5	Synpo	0.0151895	5.97068	5.63459	6.37752	5.96418	6.06593	6.82404	6.86898	7.04754	7.17077	7.37504	7.59496	7.91643	8.70598	8.2463	8.35907	8.61629	9.03749	8.94103	9.26911	9.3369
Q8CCJ4	3	Amer2	5.39539e-09	8.85593	8.75351	8.0406	8.81592	9.06442	7.51234	7.25601	7.08716	7.68771	7.64154	6.88654	7.35779	7.03047	6.92182	6.62944	6.24036	6.58112	6.629	6.36805	6.51351
Q8CCK0	3	Macroh2a2	0.210163	8.67717	8.33409	8.30348	8.47131	8.21356	6.98251	7.21957	6.7391	6.92868	6.99563	5.99242	6.14034	6.51944	6.51607	6.50012	5.94186	6.44113	6.2229	6.05077	5.94626
Q8CCN5	5	Bcas3	5.01182e-08	6.78917	7.16621	7.32091	7.04738	7.30553	7.74931	7.40442	7.67221	7.82706	8.03118	8.2619	8.55545	8.19926	8.34074	8.33336	8.28679	8.48864	8.44045	8.56366	8.49986
Q8CCS6	3	Pabpn1	1.19105e-09	5.18736	4.44655	4.52003	5.31525	4.7675	3.25792	3.05312	2.95757	3.75798	3.89204	2.73094	3.23889	3.52012	2.95238	2.90959	2.55274	3.10349	3.34941	2.43195	3.02435
Q8CCT4	7	Tceal5	5.37032e-08	4.6525	4.78919	3.81557	4.60459	5.39187	4.4944	3.26221	4.22671	5.29309	4.70294	4.81706	6.71163	5.74156	5.61367	4.9381	4.59457	5.35813	5.38303	4.94699	5.22611
Q8CDA1	3	Inpp5f	0.0499211	7.0243	7.35608	6.99512	7.04884	6.51484	6.66671	6.54151	6.13171	6.99958	6.80435	6.08081	6.2572	6.349	6.13044	6.29292	6.07251	6.04341	6.32289	6.09668	5.96821
Q8CEE7	4	Rdh13	0.202014	4.95531	3.4416	4.88113	4.96738	4.85845	4.64506	4.57943	4.27861	4.32625	4.32585	4.06374	3.64519	3.92322	4.08138	4.54894	4.02888	4.10045	3.53611	4.15804	4.06839
Q8CES0	4	Naa30	0.171827	4.8646	4.54729	4.78408	5.05162	4.54052	4.51067	4.74985	4.61446	4.81545	4.79765	3.92262	4.17824	3.92119	4.04941	4.33972	3.51368	3.84808	3.59741	3.49134	3.33941
Q8CFI0	4	Nedd4l	0.072416	7.37844	7.24783	7.04426	7.16086	7.48898	7.2237	7.23106	7.20965	7.42921	7.40743	7.35021	7.73386	7.04666	7.36048	7.37815	6.72043	7.13768	7.27338	7.1007	6.91953
Q8CFI2	8	Cdc34	1.4619e-07	3.57521	2.71601	3.89806	3.3589	2.55162	4.19381	4.0996	4.0755	4.30215	4.22679	3.83477	3.3616	3.98531	3.51582	3.65122	3.20375	3.19244	3.56169	3.57182	3.30769
Q8CGC7	3	Eprs1	0.070639	7.29238	7.29665	7.36007	7.47316	6.93484	6.90514	6.84811	6.87527	7.02247	7.00275	6.98345	6.80065	7.39696	7.16432	7.17	6.61992	6.59128	6.78146	6.92622	7.00846
Q8CGF6	4	Wdr47	0.00203011	10.1811	10.1865	10.1516	9.96006	9.91347	10.3635	10.3661	10.3502	10.4431	10.4952	9.93037	9.8966	9.7195	9.9966	9.7925	9.29633	9.41275	9.32053	9.15316	9.25072
Q8CGK3	6	Lonp1	0.00477388	5.94507	5.4514	6.22831	6.01401	5.88292	5.15799	5.32482	5.4032	5.39909	5.10076	5.5132	5.94167	5.81236	5.75404	6.05643	6.04993	6.3175	6.10515	6.52689	6.35188
Q8CGK7	5	Gnal	2.80542e-09	4.09138	5.41099	6.15226	5.70421	5.04362	6.89262	7.20748	7.41862	6.43398	6.44826	7.41874	7.01771	7.68926	7.20419	7.64981	7.96551	7.60009	7.73097	7.9485	7.68556
Q8CGY8	5	Ogt	3.61756e-05	6.93714	7.3958	7.55759	7.40636	7.50016	8.13544	8.19496	8.5356	8.34268	8.36695	8.75364	8.8107	8.79965	8.96736	9.01607	9.17461	9.31108	9.2279	9.22812	9.19986
Q8CH09	3	Sugp2	4.80955e-06	6.29626	6.23045	6.05416	5.55192	5.52579	5.38833	5.16432	4.79461	5.78746	5.55182	4.90369	5.29879	5.34316	5.76082	5.48511	4.50306	4.69645	4.98661	5.24793	5.07088
Q8CH18	3	Ccar1	9.64397e-10	5.49709	5.09733	5.21234	5.62266	5.05363	4.22833	4.22875	3.40223	3.94533	4.05775	3.97617	2.89646	3.84069	3.97551	3.96946	3.93777	2.84315	3.68021	3.68611	4.08702
Q8CH25	3	Sltm	0.00291184	6.52135	6.92916	6.38257	7.26867	7.28445	5.46444	4.89766	4.81103	5.64501	5.58128	4.85011	4.9194	5.03217	4.90581	4.96014	4.77074	5.17901	5.35165	4.92852	5.0647
Q8CH72	5	Trim32	3.54082e-05	5.76685	6.3089	6.21803	6.14347	5.88355	6.4422	6.55228	6.80487	6.68276	6.59919	6.68724	6.5646	6.65754	6.81162	6.93964	6.77231	6.6005	6.57322	6.72112	6.66608
Q8CH77	4	Nav1	3.1636e-07	10.6403	10.7505	10.7474	10.6208	10.6187	11.4063	11.2771	11.3173	11.5043	11.678	10.9774	10.8692	10.5697	10.891	10.5495	8.82649	9.09892	9.23637	8.85069	9.15267
Q8CHC4	5	Synj1	3.25678e-05	9.39793	9.29321	9.75921	9.42209	9.31872	10.4745	10.9051	11.3576	10.8523	10.8914	10.9166	10.6195	11.2112	11.3377	11.367	11.7858	11.7548	11.3787	11.9758	11.8918
Q8CHG3	2	Gcc2	2.38464e-10	6.92414	6.78452	6.86013	6.96434	7.00297	7.00396	6.94483	7.47394	7.20507	7.23121	7.17518	7.20724	7.39683	7.1556	7.22391	6.92288	6.98627	6.50054	6.64911	6.6422
Q8CHG7	5	Rapgef2	2.46899e-08	7.80876	7.67427	7.86213	7.85312	7.67466	8.23558	8.26052	8.74441	8.51414	8.52093	8.78758	8.96879	9.08314	9.05308	9.17706	9.32195	9.6287	9.18623	9.61983	9.54186
Q8CHP5	3	Pym1	0.000777132	4.18415	4.7674	4.48942	4.3739	4.76739	3.62082	3.41317	3.55354	4.25042	3.83822	3.03851	3.93072	3.57103	3.5223	3.16465	2.79592	3.35635	2.85792	3.00162	3.13118
Q8CHP8	5	Pgp	4.94753e-09	4.38535	4.66859	5.75057	5.52687	5.39122	5.95506	6.12962	6.19393	5.9084	6.26833	6.63992	6.60243	6.48719	6.46152	6.82366	6.84127	6.69185	6.90827	6.47442	6.5559
Q8CHT1	6	Ngef	1.18018e-05	7.10752	7.17086	7.26997	7.0213	6.78848	6.98209	7.04791	6.73506	6.94342	6.89314	7.02764	6.81299	7.48035	6.92843	7.27362	7.3922	7.35595	7.10797	7.41883	7.21917
Q8CHU3	5	Epn2	8.93634e-06	4.8805	4.74644	5.2623	5.18785	4.88513	5.64863	5.55229	5.59606	5.76117	5.89513	5.80273	6.0911	6.09358	5.83087	6.46503	6.03363	6.22704	6.15236	5.98953	6.22644
Q8CI08	3	Slain2	0.0453115	6.41092	6.368	5.62952	5.77011	6.18839	5.07321	4.75043	3.88143	5.34254	5.39954	3.81285	3.91406	3.6728	3.50913	3.26163	2.8354	2.37745	2.89741	2.5882	3.48441
Q8CI32	1	Bag5	8.61607e-07	6.97136	6.74823	6.9733	6.77838	6.68925	7.06557	7.19792	7.33565	7.0909	7.07386	6.87646	6.622	7.39467	7.13976	7.20843	7.48575	7.44396	7.01772	7.35141	7.25762
Q8CI51	3	Pdlim5	8.21369e-08	4.63244	5.73371	5.54289	5.0802	5.38435	5.07506	4.82707	4.65964	4.98212	5.13409	5.00411	4.95757	4.88589	4.60128	4.70343	4.47638	4.16555	4.00289	4.49808	4.78495
Q8CI61	5	Bag4	0.013654	2.88858	2.85535	3.74492	4.04328	3.92631	3.73786	4.08381	4.37784	4.25411	4.29976	4.81714	5.01644	4.73675	4.80224	4.38088	4.66371	4.7062	4.57704	4.92823	4.92452
Q8CI71	1	Vps50	0.00275653	6.12711	6.46423	6.14078	6.30194	6.30296	6.88409	6.97822	7.24015	6.96663	6.79408	6.99177	6.56356	7.15066	7.30714	7.13721	6.92248	7.10142	6.85627	7.06542	6.98099
Q8CI75	4	Dis3l2	0.000106223	5.37845	6.02765	5.52285	5.52639	5.47609	5.48054	5.4293	5.26475	5.41825	5.5685	5.14512	4.5251	4.85802	4.89956	4.73401	4.75908	4.99905	4.96999	4.74135	4.83272
Q8CI94	1	Pygb	2.94566e-05	9.08924	8.8229	9.17204	8.87391	8.72614	9.25825	9.53614	9.57667	9.5203	9.44144	9.17877	8.82316	9.47391	9.41525	9.31369	9.32577	9.1514	9.10611	9.45428	9.285
Q8CIB5	3	Fermt2	1.81152e-05	2.81298	3.92577	3.42609	4.35988	2.38494	3.76847	3.43181	3.71564	3.34221	3.33191	3.343	3.87621	3.42653	3.34687	3.33548	2.20602	3.41176	2.35141	3.24483	3.26628
Q8CIE6	4	Copa	0.00438023	9.59251	9.24238	9.37484	9.47665	9.33568	8.97213	8.90886	8.73055	8.92479	8.85241	8.59241	8.23387	8.57107	8.5042	8.42957	8.11512	8.10723	8.02563	8.15488	8.24967
Q8CIG8	4	Prmt5	0.260248	7.91594	7.98343	7.90169	8.16061	8.23771	8.10536	8.05249	7.98687	8.11953	8.16625	8.13551	8.10536	7.86303	8.03499	7.98469	7.40404	7.39288	7.48736	7.47952	7.55867
Q8CIN4	3	Pak2	2.07878e-09	7.20658	7.18685	6.94865	7.15795	7.11883	6.68684	6.47421	6.11531	6.46801	6.54461	6.41842	6.39466	5.91322	5.79957	5.91682	5.90447	5.92212	5.63113	5.67625	5.73917
Q8CIP4	8	Mark4	4.86112e-07	7.08566	7.16157	7.25784	6.80864	7.07966	7.46334	7.82679	7.81851	8.09553	7.80983	7.28138	7.13093	7.36158	7.53373	7.55423	6.70395	6.82853	6.73056	6.8893	6.96439
Q8CIQ7	8	Dock3	3.31682e-07	7.44057	7.24682	7.17532	6.77674	6.68229	7.36003	7.94828	8.28253	7.71385	7.41471	7.13737	6.8543	7.60781	7.54791	7.43006	7.21232	7.24325	6.6136	7.30374	7.05769
Q8CIV8	3	Tbce	2.86323e-06	4.5408	4.62634	4.62044	4.88909	4.72918	5.00962	4.27953	4.46134	4.47755	4.97571	4.44848	4.63234	4.49088	4.06096	4.22186	4.30214	4.12865	4.45496	4.21077	4.27265
Q8CJ19	8	Mical3	0.0194461	9.15901	9.03973	9.09834	9.1602	9.23866	9.35749	9.62253	9.85973	9.71215	9.61821	9.5871	9.45011	9.31966	9.60583	9.52646	9.42917	9.63145	9.21032	9.41065	9.37523
Q8CJF7	7	Ahctf1	0.02828	2.83418	3.0317	2.62034	2.8301	3.64755	1.70716	1.56509	0.762604	2.16421	1.7655	1.82458	2.3356	2.19771	2.06899	1.8165	2.22423	1.99044	2.43824	2.71459	2.26229
Q8CJG0	7	Ago2	0.000435326	4.13182	4.83717	4.27642	4.77427	4.94759	3.2926	3.79872	3.79636	3.97616	3.76349	4.08743	4.49504	3.99249	3.69449	3.85165	4.07544	3.86219	4.72953	4.06984	4.00945
Q8JZN5	6	Acad9	0.00028762	5.00374	4.74742	5.55834	5.52508	5.35999	4.92528	4.75263	4.67257	4.77532	4.84937	5.33316	5.27556	5.26144	5.10649	5.53533	5.38798	5.16651	5.30535	5.30896	5.54116
Q8JZP2	3	Syn3	0.00585497	7.36224	7.27154	7.15639	7.62634	7.16167	7.02125	6.83612	6.48246	6.87651	7.0817	6.64944	6.37186	6.3403	6.34689	6.57524	6.71065	6.5789	6.55789	6.63112	6.91413
Q8JZS0	6	Lin7a	0.00357159	5.91172	5.14252	5.69335	5.72304	5.55776	6.00992	5.8814	6.21283	5.51064	5.7114	6.14468	5.84189	6.79524	6.56382	7.09068	7.44709	7.13413	6.97634	7.71243	7.57795
Q8JZU2	1	Slc25a1	2.56374e-05	4.27977	5.10146	5.07254	5.19057	4.66892	4.88067	5.46571	5.53908	4.88552	5.0376	5.47042	4.72152	5.22611	5.24252	5.58122	5.67528	4.81539	5.30105	5.82027	5.6235
Q8JZW4	7	Cpne5	7.52016e-06	8.7651	9.02625	8.44202	9.31748	9.15556	8.73451	7.75949	7.56836	8.34964	8.52379	7.98678	7.85798	8.10707	8.32927	7.88676	8.34767	8.34215	8.56894	8.49232	8.53953
Q8JZX4	3	Rbm17	0.129718	6.44689	5.82716	6.39015	6.8413	6.9687	5.6434	5.47685	4.75552	5.54402	5.65604	5.10655	4.95413	4.86627	4.79582	4.82302	4.5672	4.41503	4.60895	4.55764	4.73585
Q8JZZ7	3	Adgrl2	0.00303115	5.65595	5.38885	5.60125	5.43756	6.05416	5.25755	5.04765	4.78035	4.98066	5.10675	4.89361	5.21187	4.89001	4.90766	4.78615	4.61921	4.56959	4.72131	4.74267	4.87458
Q8K004	5	Spata2	6.19757e-07	4.27403	4.01969	3.67877	4.68026	4.66639	4.7367	4.83489	5.09486	4.97784	4.91085	4.63758	5.05036	4.42583	4.62539	4.75068	4.54691	4.90375	5.10851	4.40668	4.5435
Q8K010	1	Oplah	1.39478e-05	2.91871	2.82225	3.25648	2.74195	2.58751	3.19767	3.64709	3.58563	3.58702	3.9727	2.98747	2.91391	3.71308	3.73946	3.47354	3.65649	3.66434	3.83565	3.73432	4.09679
Q8K012	4	Fnbp1l	0.0241833	7.76473	7.89084	7.74609	7.93801	7.72644	7.9659	7.74997	7.80462	7.91505	7.9719	7.97497	7.80479	7.56515	7.79209	7.74826	7.48212	7.73289	7.40196	7.46703	7.50678
Q8K021	5	Scamp1	0.000929666	7.76623	7.87475	8.05607	7.99778	7.98407	8.34195	8.20287	8.54749	8.59041	8.52542	8.73131	8.35645	8.78011	9.06755	8.82506	8.96542	9.06986	9.15919	9.28943	9.08278
Q8K0C4	4	Cyp51a1	0.00145746	7.29472	7.26461	7.00285	7.01174	6.57495	6.15969	6.30888	5.86581	6.23581	6.16371	5.74633	5.175	5.58499	5.28202	5.3764	3.22011	3.61658	4.39278	3.63836	3.9276
Q8K0D5	1	Gfm1	2.30797e-09	1.93952	2.61282	3.67416	3.06723	2.86781	3.39603	3.3703	3.36649	3.0681	2.9965	3.64474	2.82545	2.94405	3.54463	3.90757	3.92456	3.6588	3.73094	3.89445	3.86199
Q8K0P3	4	Meak7	0.246441	4.54533	5.58209	5.24418	5.29688	5.69502	5.45588	5.28516	5.10444	5.35707	5.6515	5.42834	5.55799	5.08221	5.14303	5.10292	4.36491	4.71617	4.87276	4.39576	4.39914
Q8K0S0	5	Phyhip	0.0164063	4.6094	5.24206	6.44363	5.36533	5.18881	7.85846	8.00136	8.42131	7.88139	7.92819	8.54584	7.71936	9.08436	8.92353	9.26717	9.49954	9.14641	9.08434	9.59552	9.53757
Q8K0T0	1	Rtn1	0.00193672	9.30407	9.35438	9.45306	9.15242	8.85435	9.85092	10.0737	10.2959	10.356	10.2687	10.0416	10.0828	10.3308	10.607	10.3299	10.4092	10.6013	10.1716	10.7515	10.5668
Q8K0T4	5	Katnal1	2.59009e-08	5.6473	6.05684	6.09536	6.16937	6.3388	6.41859	6.00508	5.85354	6.23029	6.34749	6.3075	6.61256	6.1685	6.26806	6.19618	6.34711	6.42525	6.41503	6.23197	6.41462
Q8K0U4	5	Hspa12a	1.61043e-06	9.69473	9.42938	9.68567	9.46154	9.38737	10.1661	10.2614	10.563	10.3523	10.4175	10.6712	10.4189	11.1968	10.9367	11.0973	11.4005	11.3339	11.124	11.4135	11.2555
Q8K183	6	Pdxk	0.11795	3.89581	3.48071	4.45226	4.04375	4.2674	4.70271	4.14857	4.66841	4.49469	4.51958	5.07391	5.08883	5.58932	4.98653	5.16114	5.91816	6.11511	5.90481	6.15086	6.08883
Q8K1A6	4	Cc2d1a	1.56913e-08	5.48214	5.45707	5.84956	5.71409	5.27401	5.54918	5.67319	5.61623	5.739	5.69246	5.27882	5.3546	5.24062	5.27901	5.18878	4.97469	4.99689	4.88338	4.78471	4.96632
Q8K1H1	3	Tdrd7	4.84215e-08	5.23409	5.58399	5.07273	4.92551	4.66254	5.25794	4.88584	4.81139	5.279	4.89608	4.93573	5.16818	5.16641	4.64088	4.60606	4.30325	4.32345	4.70478	4.69042	4.4651
Q8K1M6	1	Dnm1l	1.70433e-06	8.13005	8.17516	8.37689	8.23426	8.2082	8.67134	9.19788	9.67559	8.93003	8.9155	8.8247	8.289	9.36445	9.21408	9.2604	9.43199	9.10021	8.78654	9.376	9.232
Q8K1X1	3	Wdr11	0.0140879	3.1729	3.2397	2.87153	3.51835	3.64651	2.98976	2.25771	2.98375	2.84039	3.3137	3.00248	2.91038	2.89545	2.93733	2.57143	3.00255	2.16187	1.91992	2.83815	3.05007
Q8K212	1	Pacs1	0.00132605	9.19323	9.32026	9.31123	9.11118	9.03312	9.58454	9.81966	9.83955	9.85044	9.80091	9.65961	9.47786	9.61255	9.82689	9.73977	9.64322	9.72726	9.63543	9.78863	9.77493
Q8K221	1	Arfip2	0.0665552	5.51845	5.71501	5.93228	5.45665	4.83251	6.14422	6.66234	7.05396	6.42004	6.29	6.53226	6.05624	6.75449	6.9484	7.18705	7.10005	6.95197	6.46898	7.18617	7.14449
Q8K274	6	Fn3krp	3.35956e-06	3.71367	3.43943	4.32582	4.45823	3.54092	3.83088	3.60142	3.57464	3.71223	3.89349	4.52261	4.68448	4.36235	4.13091	4.63836	5.28459	4.94744	5.18613	4.75008	4.9815
Q8K2B3	6	Sdha	0.000132627	7.88329	7.76452	8.26228	8.15779	8.22173	7.99902	8.07774	7.9349	7.95957	8.14477	8.36063	8.12595	8.33276	8.00791	8.76378	9.03686	8.54061	8.74262	8.81553	8.9782
Q8K2C9	8	Hacd3	1.75333e-05	7.38458	6.64086	7.09072	6.67139	6.29731	7.22892	7.95527	8.12123	7.74308	7.32168	7.12068	6.18198	7.64472	7.87014	7.6257	7.34646	6.92404	6.90459	7.45885	7.25872
Q8K2I1	3	Fntb	0.000108029	6.53819	6.61542	6.11883	6.33777	6.67629	6.70299	6.45481	5.89302	6.64137	6.66413	6.25029	6.02338	6.03823	5.9643	5.65904	5.4095	5.65372	5.44642	5.30488	5.43922
Q8K2K6	6	Agfg1	0.0740763	5.78445	5.85417	5.71649	5.73255	5.54132	5.61755	5.76961	5.87976	5.81567	5.8784	5.68317	5.60832	5.60815	5.49552	5.68458	5.69756	6.0821	5.73792	5.92662	5.77387
Q8K2Q7	3	Brox	2.11739e-05	7.14821	6.86352	7.05483	7.32667	7.47623	6.39204	6.48375	5.84699	6.33357	6.33214	5.19165	5.18268	5.13106	4.84819	4.96167	5.49962	5.11932	5.40384	5.0125	5.18533
Q8K2Q9	4	Shtn1	0.0490788	9.18356	8.96203	8.41042	8.13358	8.20519	8.25288	8.39159	7.5531	7.98543	7.83655	6.94781	6.21644	5.85151	6.32874	5.93205	4.74477	4.31513	4.07866	3.39589	4.50003
Q8K2T1	3	Nmral1	2.55246e-09	8.08418	8.21361	7.76279	8.10268	7.79919	7.36991	7.31066	6.90075	7.39789	7.47366	6.85616	6.94409	6.12515	6.48094	6.10137	6.27528	6.32	6.58139	6.18649	6.54055
Q8K310	3	Matr3	3.73023e-09	9.35448	8.99829	9.04315	9.44951	9.81642	8.16643	8.22977	7.89449	7.98585	8.21194	7.04852	7.37462	7.53551	7.66291	7.80429	7.60287	6.36251	7.2941	7.67318	7.64478
Q8K341	4	Atat1	3.98857e-07	6.49627	6.63343	6.14537	6.01169	5.93188	6.0126	5.73329	5.26751	5.68221	5.52138	4.93245	4.84196	4.40454	4.4583	4.16519	3.6828	3.6753	3.82461	3.47758	3.59031
Q8K382	5	Dennd1a	1.69198e-06	4.24985	5.74865	5.48601	5.27816	5.21437	5.6485	5.37582	5.44517	5.87223	5.90414	6.05931	5.99338	5.50383	5.8033	5.76795	5.4262	5.86286	5.98541	5.78076	5.65295
Q8K386	5	Rab15	5.26659e-09	6.60883	7.10032	6.74545	6.8506	6.92236	7.3768	7.27784	7.28798	7.41001	7.53396	7.88921	7.86028	7.71984	7.91218	7.81664	7.59379	7.68462	7.95543	8.13792	8.02751
Q8K394	6	Plcl2	0.0527128	6.48293	6.04976	6.48155	6.4187	6.12595	6.43086	6.53735	6.57537	6.66297	6.71392	6.39875	6.39356	6.92473	6.67677	6.78785	6.93076	7.111	6.93915	7.10859	7.15894
Q8K3H0	1	Appl1	2.33729e-07	5.15884	4.04072	5.53682	5.20937	5.26666	5.76248	6.14811	6.10876	5.60724	5.61106	5.7295	5.19533	5.61091	5.46072	5.56181	6.13288	5.9485	5.74524	5.70135	5.75129
Q8K3I4	5	Myrip	0.000111127	4.0748	4.84726	6.01394	5.40227	4.93113	7.11458	7.02113	7.46546	7.49192	7.66085	7.3075	7.3318	7.03139	7.50234	7.33171	6.23336	6.72782	6.69543	6.62251	6.81913
Q8K3J1	6	Ndufs8	0.00714838	6.17981	6.43424	7.03283	7.16835	7.01921	6.80435	6.47899	6.58618	6.73535	6.93687	7.33503	7.76288	7.44621	7.47331	7.68396	7.99873	8.14277	8.50909	8.30925	8.33712
Q8K400	5	Stxbp5	1.068e-06	5.03149	5.52634	5.60752	5.10679	5.71898	5.92779	5.79605	5.74419	6.06282	6.22767	6.40193	6.15633	6.13128	6.19163	6.13346	6.0771	6.31161	6.24137	6.33148	6.49342
Q8K4B0	3	Mta1	6.90058e-07	5.14784	5.34678	4.95784	5.45599	5.56719	3.86694	3.48128	3.26791	3.71254	3.74026	3.3442	3.50649	3.27332	3.39019	3.03498	2.22983	3.00145	2.91372	2.9678	3.40005
Q8K4G5	4	Ablim1	3.32136e-05	9.95844	10.2424	10.0686	9.64641	9.94151	9.89044	9.84695	10.0545	10.194	10.1943	9.63145	9.81678	9.50758	9.72987	9.59746	9.10759	9.47145	9.18344	9.24943	9.28359
Q8K4P8	4	Hecw1	2.21297e-08	6.79189	6.72083	6.76175	6.00621	6.46544	6.68102	6.61913	6.60747	7.03813	7.04713	6.22689	6.42509	6.46044	6.58838	6.36504	5.54827	5.95513	5.53321	5.2512	5.64896
Q8K4Q0	5	Rptor	9.583e-06	6.60073	6.59312	6.60157	6.55479	7.2036	6.90192	6.75453	6.77569	7.01242	7.17995	7.18812	7.45253	7.15086	7.18799	7.24241	7.1619	7.55524	7.25608	7.38431	7.51632
Q8K4R4	4	Pitpnc1	1.14396e-05	6.13512	6.19818	6.18259	6.28103	6.42711	6.50558	6.40442	6.6338	6.60321	6.68147	6.41708	6.69535	6.61248	6.37879	6.48178	5.91616	5.89148	5.82297	5.86287	6.02101
Q8K4X7	7	Agpat4	0.000344788	4.7972	4.9536	4.80249	5.29499	5.16244	4.68646	4.33438	4.49859	5.04254	4.91331	5.31267	6.05721	5.50205	5.59204	5.49631	4.58668	4.8483	5.43851	5.06425	5.0018
Q8K4Z3	6	Naxe	6.04956e-07	4.41769	2.52082	4.07145	3.8982	4.22402	3.76917	3.57999	3.43705	3.07563	3.46597	4.03967	3.80384	3.61915	3.48166	3.91513	4.61927	4.38332	4.24779	4.52071	4.29494
Q8K4Z5	3	Sf3a1	0.00132304	6.48811	5.7482	6.40192	6.42449	6.38042	5.26664	5.05006	4.68574	5.12191	5.28529	5.08084	4.96726	4.91349	4.87514	5.13983	4.66949	4.32166	4.74346	4.89117	5.03331
Q8K596	1	Slc8a2	0.0227094	7.27438	7.45172	6.86482	6.14776	6.08461	7.61795	7.66368	8.0445	8.25409	8.20423	7.85154	7.86666	8.83217	8.76379	8.98313	8.59514	8.82873	8.3653	9.59669	9.37666
Q8QZY1	3	Eif3l	6.86463e-05	7.26358	6.97529	7.04564	7.07566	6.72305	6.76329	6.84259	6.96126	6.85372	6.49704	6.45627	6.12294	7.02705	6.72906	6.70342	6.25653	6.21712	6.27445	6.54242	6.39056
Q8R001	4	Mapre2	0.59208	9.03524	8.9253	9.05477	8.88958	8.70333	9.49883	9.51052	9.3909	9.47618	9.45304	9.23159	8.91744	9.1449	9.08178	8.88252	8.64098	8.69391	8.33371	8.50502	8.60068
Q8R050	4	Gspt1	0.00215126	6.07846	5.63793	5.74746	5.47316	5.60843	5.35743	5.70211	5.43916	5.81608	5.72478	5.11624	4.32005	5.06356	4.98358	5.03199	4.98502	4.60896	4.74165	4.7385	4.93598
Q8R071	5	Itpka	2.63451e-07	4.59013	4.44265	5.66787	5.22398	5.06637	6.27552	6.49498	6.60672	6.15725	6.46207	7.07763	6.47949	7.51151	7.07476	7.62578	8.05587	7.96557	7.66642	8.19932	8.2252
Q8R081	3	Hnrnpl	2.74714e-05	8.79402	8.80204	8.72992	9.26587	8.90848	7.80694	7.52402	6.98095	7.6491	7.81183	7.1508	7.56637	7.51644	7.41493	7.56486	7.14985	6.68537	7.33575	7.45861	7.41615
Q8R0A7	5	Kiaa0513	3.79476e-08	6.44994	6.50505	7.01109	6.68514	6.67638	7.70276	7.52459	8.02728	7.64738	7.76673	8.75212	8.86655	8.92163	9.17369	9.19938	9.61873	9.80063	9.38771	9.8177	9.67678
Q8R0F8	6	Fahd1	4.7251e-07	3.35917	3.12933	2.89669	3.04535	3.13831	2.54503	3.64711	3.2379	3.13473	3.29529	3.77371	2.93998	3.63974	3.39292	3.95777	4.46984	3.83999	3.49851	4.5964	4.61481
Q8R0J7	3	Vps37b	1.56224e-10	4.59506	5.44494	4.81932	4.77872	5.32121	4.84365	4.28065	4.7203	5.13025	5.30321	4.99828	5.04323	4.44624	4.64168	4.54557	3.77017	4.15511	4.26689	4.24271	4.20836
Q8R0S2	5	Iqsec1	0.00196293	8.34038	8.39983	8.84427	8.66928	8.71286	9.76282	9.86732	10.4818	10.1075	9.99479	10.2903	10.3677	10.4831	10.6454	10.6759	10.477	10.7533	10.4079	10.8292	10.6677
Q8R0Y6	7	Aldh1l1	0.00396329	8.58642	8.29692	8.75289	8.74293	8.35679	7.98076	7.82459	7.50867	7.77857	7.75968	7.83534	7.95501	7.83472	7.71141	8.24198	8.21149	7.93264	8.02397	8.32288	8.02948
Q8R105	2	Vps37c	4.77392e-09	6.71621	6.91488	7.04733	7.15159	7.61459	7.54199	7.43037	7.68707	7.73984	7.94164	8.13843	7.94111	7.50848	8.12756	7.62213	7.15321	7.51302	7.34108	7.38804	7.37087
Q8R127	6	Sccpdh	7.59047e-05	5.10958	5.43811	5.6255	5.17563	5.30378	5.66001	5.55326	5.29802	5.50349	5.63358	6.14156	5.51633	5.89846	6.02611	6.26109	6.47916	6.0685	6.23734	6.4551	6.50773
Q8R164	6	Bphl	0.00119584	4.14641	4.0505	4.55357	4.69324	4.68646	4.7823	4.15439	4.45379	4.19115	4.18933	4.98072	4.84474	5.17852	4.75451	5.49454	6.05479	5.68249	5.9447	6.38582	6.37438
Q8R191	5	Syngr3	1.14394e-05	3.40201	5.4448	5.55838	5.18254	5.64108	6.44219	6.21395	6.45735	6.42467	6.62141	7.32354	7.22275	6.69483	7.18086	6.73456	7.20212	7.31629	7.3482	7.40804	7.36376
Q8R1A4	3	Dock7	6.31477e-07	6.99056	6.59057	6.71875	6.82122	7.02122	6.55066	6.40763	6.13816	6.49176	6.66073	6.08224	6.08941	5.82699	5.78313	5.63562	5.2883	5.65221	5.80548	5.3589	5.37508
Q8R1Q8	8	Dync1li1	1.98241e-05	7.83628	7.62692	7.72395	7.60115	7.17901	7.79091	8.1168	8.30222	8.11947	8.28338	7.8409	7.78359	7.82797	7.98194	7.81378	7.65908	7.54093	7.24687	7.61476	7.56891
Q8R1R3	4	Stard7	2.7626e-07	4.01613	4.92869	5.00473	4.69887	5.04275	5.81644	5.40427	5.20031	5.56388	5.84489	5.46836	5.49379	4.98886	5.31195	4.75224	3.85024	3.96625	4.11862	3.64607	3.88992
Q8R2R9	5	Ap3m2	0.000612278	4.42602	4.82555	5.40902	4.14298	4.37067	5.51488	5.03011	5.11116	5.61147	5.56206	5.8396	6.08062	6.00116	6.10253	6.06628	6.11892	6.19292	6.48693	6.54544	6.56408
Q8R2Y0	1	Abhd6	1.87379e-06	5.89259	6.00312	6.26283	5.99621	5.16043	6.7006	6.8141	6.87257	6.79459	6.95494	6.86386	6.13885	7.14698	7.20325	7.13149	6.83234	6.63578	6.37897	6.8327	6.9056
Q8R307	4	Vps18	0.69104	5.52371	5.82052	5.73277	5.52256	5.10766	5.74022	5.68693	5.60303	6.03804	5.99269	5.7292	5.57917	5.46077	5.61273	5.59569	5.27708	5.48342	5.46693	5.26465	5.48824
Q8R313	8	Exoc6	0.000583428	5.02251	4.47978	5.29226	4.55826	3.52482	5.06896	5.63206	5.81682	5.59295	5.39584	4.87236	4.53219	5.21691	5.36493	5.21192	4.96311	4.67504	4.15013	4.87315	4.63817
Q8R326	3	Pspc1	0.0230769	7.47284	7.09937	7.53267	8.02942	7.45331	6.76756	6.41394	5.61352	6.03357	6.22845	5.91429	5.39828	6.11369	5.72866	6.39858	6.26356	4.76	5.61266	5.96887	6.3227
Q8R361	5	Rab11fip5	0.0178637	6.28348	6.42079	6.48213	6.16471	6.37681	6.71365	6.54585	6.68018	7.00412	7.118	6.69901	6.77337	6.91877	6.9194	7.09018	6.71	6.94688	6.88875	7.07376	7.04669
Q8R366	6	Igsf8	0.000121328	5.95179	6.41137	7.55694	7.3155	7.25743	7.7573	7.2879	7.08755	7.39269	7.42895	8.01805	8.29828	8.0566	7.68528	8.58267	9.35444	9.04459	9.45593	9.49104	9.50676
Q8R3Q2	2	Ppp6r2	0.000304354	7.0282	7.30869	7.2367	7.46207	7.56846	7.74395	7.66619	7.71788	8.07598	8.18899	7.86417	8.3534	7.72561	7.90946	7.85204	7.32935	7.67719	7.49963	7.24893	7.24326
Q8R3S6	4	Exoc1	1.09243e-06	7.17584	7.10173	7.05483	7.08815	6.84777	7.02225	6.89294	6.8153	7.1124	7.12213	7.02462	6.63979	6.76293	6.83174	6.71921	6.86989	6.85304	6.7159	6.65878	6.78455
Q8R3V5	5	Sh3glb2	0.000654376	6.81437	6.87986	7.49554	6.99539	7.03294	8.11201	7.9206	8.27394	8.18225	8.33381	8.74887	8.84922	8.77858	8.99743	8.99781	9.2779	9.46639	9.30407	9.51148	9.41994
Q8R464	6	Cadm4	2.83823e-10	3.56981	3.20915	3.47236	3.37779	3.11475	2.96683	3.0812	3.5801	3.52474	3.66895	3.94178	4.09986	4.01002	3.98224	4.48565	4.4839	4.41163	4.04538	4.79645	4.68444
Q8R4H2	4	Arhgef12	0.137605	8.87072	8.86052	8.51935	8.55873	8.30085	8.51859	8.74817	8.65223	8.7714	8.73759	8.13518	8.02101	8.17418	8.2767	8.0831	7.50886	7.83655	7.67115	7.53272	7.61533
Q8R4U7	5	Luzp1	9.46473e-06	5.55537	5.57442	5.97977	5.79242	6.4686	6.17666	6.03065	6.17416	6.53791	6.40816	6.54013	7.323	6.95941	6.76551	7.09849	6.49405	7.11941	6.9877	6.81158	6.84847
Q8R550	5	Sh3kbp1	1.3033e-07	4.83807	4.47072	5.13171	5.7827	5.45274	5.31898	4.9994	5.34219	5.24657	5.05343	5.32326	5.78525	5.5192	5.30459	5.4857	5.60422	5.76428	5.52867	5.79311	5.75621
Q8R554	5	Otud7a	9.94759e-05	2.98438	3.75231	3.04808	3.28529	4.85517	4.97316	4.68896	4.90812	5.07178	5.34887	5.4396	5.64801	5.32866	5.53589	5.48656	4.64563	5.0335	5.17518	5.05997	4.82753
Q8R570	8	Snap47	0.0318852	6.71546	6.05014	6.37703	6.20904	5.3981	6.38845	6.71425	7.08344	6.84408	6.37403	6.09105	5.93652	6.34804	6.47695	6.5966	5.95546	5.91576	5.46905	6.39543	6.12792
Q8R574	7	Prpsap2	3.48231e-05	5.69807	5.4613	5.84994	6.07394	6.61191	5.41157	5.22176	5.1519	5.30826	5.57189	5.64875	5.65001	5.22102	5.27478	5.46101	6.05232	5.76084	5.83553	5.6223	5.76605
Q8R5H1	1	Usp15	0.0463853	8.42472	8.06307	8.35166	8.09982	7.60138	8.45861	8.89998	9.03649	8.90228	8.72658	8.61293	8.32939	9.01014	8.95637	8.86336	8.72363	8.7007	8.41883	8.83556	8.71154
Q8R5H6	1	Wasf1	0.00886051	7.74334	7.78493	7.95609	7.54448	7.78073	8.65886	8.56699	8.85199	8.51465	8.58696	8.40334	8.43296	8.46094	8.46641	8.60576	8.51125	8.45848	8.16624	8.55547	8.56536
Q8VBT0	3	Tmx1	3.51991e-07	6.21086	6.38801	6.27978	6.35966	6.12139	5.8406	5.50338	5.40485	6.01802	5.60351	5.4005	5.67485	5.54727	5.72116	5.17145	5.00745	5.23678	5.40101	5.22714	5.22258
Q8VBY2	5	Camkk1	4.06419e-06	5.59221	5.14771	5.75548	5.45866	6.30875	5.88562	5.7458	5.65623	6.1094	6.12272	6.00402	6.41754	5.97915	6.12726	6.01801	6.24772	6.63789	6.48721	6.43245	6.48481
Q8VBZ3	2	Clptm1	0.0788171	4.9192	5.43035	5.07078	5.04912	5.50111	5.37628	5.47834	5.72802	5.88562	5.4357	5.30395	5.40068	5.38846	5.68533	5.36492	4.8773	5.13125	5.16176	5.23612	5.14721
Q8VC30	4	Tkfc	0.00210832	5.08299	5.2376	5.60529	5.14777	5.33732	5.25978	5.47331	5.08687	5.58392	5.66168	5.40195	4.89686	5.5761	5.22104	5.26002	5.02091	5.3903	5.12957	4.64296	4.6753
Q8VCC9	3	Spon1	0.0074923	5.26521	4.52863	5.34202	5.34782	5.28098	4.79943	4.51598	4.48332	4.8678	4.8997	4.22274	4.72676	4.27947	4.52806	4.22089	3.75382	4.41255	4.40676	4.43028	4.43803
Q8VCD6	3	Reep2	0.0916817	7.48577	6.98205	6.9538	7.41726	7.68476	6.49376	6.42907	6.96256	6.60815	6.60672	6.20058	6.42501	6.38797	6.71726	6.21961	6.05149	6.78291	5.94234	6.31189	6.22358
Q8VCH8	4	Ubxn4	0.000896089	8.07161	8.07594	8.07532	8.21545	7.90776	7.92188	7.72651	7.38804	7.78504	7.98091	7.51126	7.32517	7.37682	7.27223	7.39814	6.80998	6.80767	6.98884	6.91634	6.97939
Q8VCT3	6	Rnpep	0.000134306	6.90908	6.98714	7.15519	6.9772	7.15732	7.30588	7.34578	7.4777	7.3127	7.12053	7.36378	6.89884	7.45115	7.47042	7.40245	7.72245	7.74387	7.58873	7.96953	7.85727
Q8VD04	5	Gripap1	3.59412e-08	6.88974	7.05486	7.19497	6.98663	7.15681	7.30621	7.13539	7.42742	7.45002	7.56002	7.58583	7.89243	7.72691	7.67379	7.67296	7.52696	7.75778	7.49911	7.70011	7.66044
Q8VD37	5	Sgip1	4.84015e-05	6.56969	6.71007	7.91357	7.48978	7.35176	8.86778	9.0809	9.70051	9.37768	9.34808	9.68119	9.57401	9.84951	9.9214	9.96479	10.0604	10.1001	9.75884	10.0737	10.0235
Q8VD62	1	Bles03	5.71174e-06	4.10015	4.6182	4.51823	4.21848	4.11728	4.4804	4.61535	4.47209	4.71084	4.90155	4.59752	4.57889	4.66905	4.73387	4.62093	4.97983	4.97728	4.7593	4.93653	4.88048
Q8VD65	5	Pik3r4	1.72286e-08	6.78264	6.63589	6.78	6.9944	6.81331	7.17597	7.01121	7.09567	7.20048	7.26179	7.42181	7.41682	7.454	7.50173	7.4493	7.66334	7.88596	7.67934	7.93411	7.88153
Q8VD75	4	Hip1	0.000430818	7.04372	7.16148	7.40343	7.06147	7.448	7.30999	7.25801	7.33739	7.58985	7.59421	7.1599	7.07815	7.10646	6.97998	6.90808	6.46792	6.18837	6.32463	6.07508	6.01093
Q8VDD5	6	Myh9	7.06365e-09	8.78251	8.90501	9.12381	9.34906	8.67784	8.84208	8.98301	9.40386	9.14779	9.19672	9.58762	9.98106	10.2999	9.97858	10.175	10.1355	10.5157	10.269	10.3834	10.3348
Q8VDJ3	4	Hdlbp	9.72702e-08	7.03836	6.89191	7.28449	6.86198	6.78922	6.95528	6.89697	6.8416	6.95226	7.04505	6.74307	6.54081	7.0855	6.75339	6.87255	6.58189	6.66019	6.34668	6.53109	6.52067
Q8VDM4	8	Psmd2	3.47965e-07	7.37236	6.84675	7.14601	7.08125	6.62924	6.73622	7.04186	7.15523	7.06721	6.83045	6.49166	6.22176	6.91767	6.85221	6.90952	6.67101	6.30286	6.00361	6.51336	6.43118
Q8VDM6	3	Hnrnpul1	0.00195183	7.24706	7.31163	7.50431	7.91119	7.63708	6.63409	6.44177	6.10259	6.50383	6.53731	6.09142	6.55332	6.52105	6.44962	6.56455	6.16128	5.99608	6.33958	6.34801	6.63312
Q8VDN2	5	Atp1a1	0.00658271	6.92736	7.47226	9.01888	8.57872	8.64163	9.94001	9.77832	10.0868	9.82757	9.99375	10.8555	11.1045	10.9485	10.927	11.1697	11.4327	11.4842	11.4267	11.6206	11.5648
Q8VDP4	3	Ccar2	1.9168e-06	6.03689	5.41073	5.48113	5.64935	5.77234	4.24781	4.09664	3.69476	4.67179	4.09442	3.42778	4.2072	4.12504	3.94053	4.26279	3.82616	3.00471	4.10584	4.30233	3.92625
Q8VDQ8	5	Sirt2	5.18153e-06	4.81423	4.39981	5.68761	4.98136	4.60806	6.28603	6.33063	7.16271	6.13737	6.22555	7.48324	6.97115	8.29857	7.5292	8.66899	8.5053	7.65116	7.64004	8.41702	8.44349
Q8VDU5	5	Snrk	0.241127	3.52505	3.6013	4.34946	4.43369	3.96993	4.95782	5.58511	6.049	5.33489	5.17294	5.30765	5.23981	5.33822	5.59377	5.48318	5.33919	5.62759	4.83888	5.4065	5.1859
Q8VDZ4	5	Zdhhc5	4.35919e-07	4.69538	5.81784	5.70758	5.42007	5.45355	6.10975	6.13448	6.4161	6.33523	6.39619	6.80859	6.6657	6.70587	6.93377	6.72608	6.95077	7.08685	6.91882	7.08335	7.12223
Q8VE18	3	Smg8	1.72273e-05	3.39382	3.98165	3.75848	3.56861	3.59105	2.8976	3.42005	2.93739	3.41698	3.67712	3.07845	3.21376	2.94674	3.21493	2.75125	2.72097	2.93732	3.05788	3.07429	2.76263
Q8VE33	8	Gdap1l1	2.89301e-07	8.44922	8.27918	8.24367	8.28278	7.9814	8.56206	8.85935	8.92821	8.86216	8.63016	8.55024	8.00597	8.55156	8.63867	8.67158	8.5486	8.32988	8.03371	8.53777	8.34873
Q8VE47	8	Uba5	0.00119251	4.50013	4.75932	4.88995	4.92448	4.4285	5.33278	5.36101	5.29587	5.23084	5.02406	5.16393	4.68964	5.12954	4.85565	4.98124	4.30051	5.03307	5.1285	5.02746	5.02118
Q8VE62	8	Paip1	0.00865994	6.51886	6.1331	5.76318	5.91801	5.66309	5.63929	6.6255	6.89103	6.48724	6.10539	5.40113	4.59444	5.89318	5.91677	5.69091	5.52275	5.4294	4.60599	5.92686	5.69105
Q8VEH3	4	Arl8a	0.0199464	8.58603	8.37649	8.40965	8.41058	8.33145	8.31557	8.54869	8.79937	8.71667	8.25529	8.18102	7.84926	8.20662	8.17813	8.22295	7.6781	7.71379	7.56646	7.8764	7.6816
Q8VEH5	3	Epm2aip1	0.0277232	6.73406	7.02759	6.98977	7.30884	7.15064	6.52873	6.23687	6.07746	6.40889	6.6874	6.24768	6.57414	6.29636	6.19634	6.11134	5.58372	6.09225	6.09983	5.80874	6.02963
Q8VEJ9	3	Vps4a	5.16736e-06	4.85322	4.45869	4.51314	4.63389	4.62202	4.23727	4.80476	4.56238	4.34873	4.51701	4.18869	3.29953	4.30445	4.09193	4.01076	4.18983	4.20087	3.47994	3.73532	3.95472
Q8VEK3	3	Hnrnpu	9.20102e-06	11.4946	11.2935	11.1247	11.5139	11.1009	10.0364	10.4596	10.313	10.4579	10.1123	9.55442	9.71992	10.1831	10.0669	10.1194	9.61473	9.723	9.85912	10.155	9.86369
Q8VEM8	5	Slc25a3	0.00254661	7.4334	7.44806	8.11947	8.13446	7.70877	8.23834	8.74089	9.22257	8.5551	8.25833	9.18077	8.22273	9.3667	9.62634	9.54804	9.99894	10.0281	9.98909	10.6411	10.2632
Q8VH51	3	Rbm39	1.88668e-07	6.38095	6.50444	6.38327	6.79581	6.71613	5.24065	5.18954	4.9	4.95303	5.21695	5.13627	4.76176	4.95154	5.12396	5.0428	4.69309	4.77339	5.32298	5.12482	5.13
Q8VHH5	4	Agap3	2.278e-06	9.08643	9.03576	8.74897	8.36292	8.30234	9.35715	9.42117	9.21001	9.15952	9.17938	8.53475	7.75953	8.0007	8.30182	8.08363	7.77666	7.6355	7.48912	7.59446	7.66361
Q8VHI6	5	Wasf3	1.46064e-08	4.9378	5.18141	5.32408	4.82607	5.27125	5.57691	5.5338	5.60793	5.68437	5.82788	5.75975	5.70058	5.85663	5.82129	5.66709	6.24974	6.4726	6.19282	6.29613	6.25999
Q8VHJ5	5	Mark1	4.11662e-07	7.4829	7.717	7.63218	7.76815	7.9612	8.07113	7.93195	7.81189	8.36392	8.27039	8.01444	8.21302	8.08614	8.12062	8.20352	7.94167	8.27825	8.13382	8.08399	8.12765
Q8VHR5	3	Gatad2b	4.05636e-08	4.45991	4.71549	4.77305	5.30088	5.00975	3.75085	3.69327	2.88547	3.0122	3.0459	2.48326	2.79474	2.8741	2.61682	3.0016	2.50924	2.12404	2.86228	2.67605	2.64818
Q8VIJ6	3	Sfpq	0.00303372	9.67803	9.52462	9.53386	9.89059	9.43584	8.35233	8.16148	7.68606	8.33389	8.3486	7.73357	8.08266	8.08514	8.11265	8.03842	7.60997	7.67762	7.90448	8.04431	8.09141
Q8VIM9	4	Irgq	6.92908e-08	6.77447	7.10667	6.82918	6.7615	6.60633	6.41894	6.64218	6.36755	6.81596	6.66345	5.91802	6.19196	5.99089	6.03804	5.98678	5.04968	5.53988	5.27637	5.24193	5.55677
Q8WTY4	4	Ciapin1	1.75531e-08	5.99318	6.4953	6.24658	5.40105	6.00915	6.18556	6.36679	6.30307	6.55991	6.34205	6.0775	6.26374	6.30325	6.40581	6.27661	5.38901	5.60815	5.46538	5.13577	5.09344
Q91V09	5	Wdr13	1.84e-08	5.30729	5.93587	5.88606	5.59303	5.81747	5.9834	5.78117	5.83978	6.25616	6.04711	6.15704	6.86874	6.2704	6.34247	6.52947	6.04703	6.54525	6.51189	6.71347	6.54933
Q91V12	2	Acot7	5.71929e-05	7.31942	7.96755	8.11904	8.1249	8.27435	8.53737	8.23572	8.01517	8.36609	8.64142	8.71599	8.82555	8.57318	8.6058	8.56708	8.1645	8.21984	8.48279	8.23374	8.44315
Q91V14	1	Slc12a5	0.000507637	6.07212	6.21403	6.60987	6.25737	6.29416	6.87888	7.76494	8.43643	7.48631	7.07187	7.17754	7.28827	8.30012	7.89648	8.45931	8.0622	7.87207	7.47534	8.66717	8.41674
Q91V36	8	Nrbp2	0.00438023	5.94127	6.65817	6.30914	5.7319	5.86357	7.21434	7.3218	6.95035	6.92371	6.93352	6.32135	5.81453	6.23941	6.37858	6.4122	6.11707	5.69388	5.43079	6.00763	6.14262
Q91V57	3	Chn1	7.40752e-05	6.87189	7.09656	6.92684	6.79241	6.89168	6.97244	6.69366	6.51947	6.87085	6.89634	6.57594	6.32231	6.17703	6.34329	6.17302	5.95372	6.24752	6.04911	6.02554	5.92187
Q91V61	6	Sfxn3	0.186295	7.44466	7.54277	7.86571	8.00406	8.14888	8.07607	8.02552	8.24637	8.06984	8.01263	8.55575	8.34159	8.8939	8.72541	9.21023	9.98257	9.63826	9.66121	10.2641	10.0898
Q91V92	4	Acly	6.51588e-07	10.1329	10.2023	10.1405	9.91288	9.82811	10.2475	10.2184	10.1043	10.4553	10.306	9.99035	9.79255	10.2254	10.0384	9.89305	10.018	9.99971	9.87989	10.1672	9.9932
Q91VD9	6	Ndufs1	3.35215e-08	6.92652	6.46979	7.13621	7.20252	7.08171	6.78509	6.89711	6.67748	6.44736	6.95738	7.16891	7.20027	7.35221	7.12474	7.75083	8.02366	7.55448	7.6733	7.96878	8.06062
Q91VF2	5	Hnmt	3.21285e-05	2.25531	4.15099	4.49996	4.0561	4.11869	5.41746	5.51475	5.9186	5.71491	4.99164	5.27075	5.47466	5.76036	5.4668	6.1202	5.68565	5.55804	5.3669	5.52505	5.55885
Q91VI7	6	Rnh1	0.230954	4.9309	4.8198	4.71002	4.73214	4.56876	4.36998	4.30744	4.4375	4.46385	4.91014	4.64691	4.03515	5.0765	4.74491	4.45964	5.46453	5.54619	5.16842	5.22167	5.19451
Q91VM5	3	Rbmxl1	0.000130849	6.54962	5.58642	5.51598	6.22164	6.57805	4.7119	5.0022	4.95205	5.12167	4.96035	4.36831	5.03562	4.94503	4.89255	4.63999	3.30488	4.25937	4.76883	4.56582	4.63062
Q91VN4	6	Chchd6	0.000632621	6.39949	6.56063	6.82497	6.88627	7.0836	6.55093	6.35999	6.24498	6.48645	6.62484	6.72818	6.95165	6.88032	6.79254	6.91377	7.31436	7.1444	7.17592	7.26678	7.27971
Q91VR2	6	Atp5f1c	7.63212e-05	7.6708	7.4221	8.00628	7.91139	7.22887	8.03788	8.57379	8.37164	7.89588	7.85383	8.44597	7.18147	8.60186	8.30498	9.19349	9.65393	8.61454	8.59768	9.74186	9.5726
Q91VR5	3	Ddx1	3.29491e-05	7.78411	7.3468	7.56773	7.91147	7.5508	7.09237	7.35945	7.37345	7.06417	7.11917	6.87541	6.57201	7.39958	6.8703	7.2827	7.11133	6.82426	6.46574	6.89236	7.12168
Q91VR8	6	Brk1	0.00220215	6.62674	5.89112	6.72027	7.12781	7.05874	6.67355	6.1271	6.35697	6.48021	6.3815	6.67811	7.38709	7.14013	7.04757	7.13717	7.43728	7.39535	7.49982	7.59071	7.5033
Q91VX2	3	Ubap2	0.00189651	6.94403	6.43442	5.8524	6.67819	6.74843	4.98152	5.09047	4.52255	5.185	5.39743	4.62677	4.90551	5.296	4.65851	4.54176	3.75147	4.00475	4.43729	4.29816	4.49884
Q91VZ6	1	Smap1	0.000291625	7.47243	7.29268	7.6123	7.41376	7.34404	7.99197	8.06461	8.1932	8.22075	8.29028	7.81595	7.69108	7.9436	8.07831	8.11317	7.92328	7.93628	7.79175	8.08376	8.0704
Q91W18	3	Tdrd3	3.72642e-07	4.58747	4.44888	4.50893	4.95808	4.6313	4.08592	3.80139	3.04082	3.70263	3.90895	3.74708	3.30093	3.24422	3.2247	3.15518	2.3526	2.6082	3.47014	3.16696	3.3133
Q91W39	3	Ncoa5	6.50624e-06	5.08269	4.23527	5.03109	4.70089	4.15288	3.87571	4.12944	3.08059	3.41277	3.57187	3.15146	2.89254	3.02128	3.49008	3.72752	3.22553	1.00051	2.2209	2.97715	3.26473
Q91W50	2	Csde1	2.03298e-05	8.93823	8.87509	9.02231	8.97455	8.85632	9.06488	9.08061	9.25824	9.10094	8.99415	9.00493	9.13409	9.09554	8.99546	9.06491	8.75229	8.80582	8.58976	8.71918	8.60848
Q91W86	8	Vps11	0.000547817	5.46865	5.75224	5.97022	5.23604	5.28258	6.05574	6.03065	6.19136	5.9282	6.00621	5.61297	5.41598	6.02669	6.01968	5.79172	5.84551	5.59805	5.59383	5.66169	5.80198
Q91W89	6	Man2c1	6.6118e-06	6.13054	6.03402	6.44468	6.27253	6.39977	6.46853	6.72618	6.86713	6.71012	6.66541	6.46242	6.27783	6.89749	6.72353	6.66691	7.08314	7.11934	6.7375	7.12385	6.97466
Q91WC3	5	Acsl6	0.0204857	7.13324	7.60201	7.7395	7.39965	7.51808	8.05464	7.81478	8.03837	8.18942	8.03523	8.24599	8.22794	8.75925	8.54346	8.71353	8.47516	8.26008	8.56007	8.69283	8.58758
Q91WD5	6	Ndufs2	0.000161983	4.70931	3.79764	5.54684	5.16987	4.21269	5.23067	5.26907	4.94162	4.49026	4.87426	5.46731	4.85193	5.4695	5.36967	6.01639	6.50349	5.88801	5.90188	6.27575	6.42287
Q91WE4	3	NA	2.43242e-06	6.51485	5.94376	5.78759	5.91657	5.74957	5.0477	5.22141	6.0127	5.46155	4.84933	4.34443	4.52112	5.23456	5.33785	5.15639	5.09162	4.85385	4.97578	5.48926	5.14873
Q91WJ8	3	Fubp1	0.000772367	7.36012	7.11456	7.55077	7.94293	7.75633	5.98031	5.72857	5.28429	5.95371	6.27561	4.91822	5.79332	5.39699	5.31471	5.36486	4.99229	4.62161	5.1124	4.97804	5.50025
Q91WK2	3	Eif3h	0.00290449	6.52153	6.02424	6.40632	6.81865	5.98879	5.88927	6.24337	5.99338	6.00075	5.96176	5.83244	5.57827	5.94771	5.62816	6.0102	5.68221	5.31075	5.25381	5.24147	5.51661
Q91WQ3	3	Yars1	6.12431e-08	7.04721	6.67284	7.10718	6.99102	6.78595	6.64434	6.75989	6.65215	6.49661	6.53217	6.53815	6.06467	6.48296	6.50243	6.74439	6.57044	6.31232	6.41678	6.55041	6.36005
Q91WS0	6	Cisd1	0.000121301	7.87759	8.11138	8.19619	8.21183	7.95154	8.37846	8.51754	8.88638	8.56795	8.32037	8.73735	8.5042	9.22626	9.46872	9.51291	9.86884	10.1347	9.83003	10.3843	10.0869
Q91X78	6	Erlin1	0.00224938	4.42152	4.91511	5.48556	5.56728	5.40089	5.49353	4.9258	4.65873	4.3789	4.82759	5.14493	4.67793	5.22201	4.61738	5.39455	5.92629	5.34355	5.18308	5.4142	6.05407
Q91X97	5	Ncald	2.16558e-07	5.72749	5.98145	6.38956	6.47667	5.94504	6.72011	6.49427	6.45424	6.90353	6.93611	6.89517	7.08053	6.62322	7.03885	6.76506	6.83212	6.88679	6.90603	6.93448	6.99651
Q91XD6	4	Vps36	0.0736205	5.40859	5.34882	5.63452	5.20365	5.87177	5.75946	5.51642	5.51857	5.77418	5.54472	5.5606	5.39639	5.30597	5.247	5.34308	4.9122	4.85512	5.06752	4.48949	4.98711
Q91XL9	1	Osbpl1a	0.000126792	6.38929	6.43558	6.66241	6.18467	5.64157	7.08242	7.10737	7.27644	7.2046	7.14081	6.71072	6.31016	7.18436	7.11145	7.36202	7.04549	6.80401	6.65316	7.35953	7.22254
Q91XM9	1	Dlg2	0.000127341	9.11728	9.05385	9.44398	9.15173	8.99476	9.87475	10.0753	10.3392	10.0832	10.0766	9.95023	9.79082	10.2462	10.1193	10.1618	10.0497	9.96526	9.6304	10.0518	10.0489
Q91XU3	5	Pip4k2c	0.00301576	4.31524	5.29915	5.56013	5.12826	5.27162	5.70065	5.8286	6.39169	5.89642	5.90709	6.59847	6.73453	6.77599	6.76804	7.10638	7.77989	7.86123	7.45736	7.81746	7.79993
Q91XV3	6	Basp1	1.70647e-06	10.4351	10.3017	10.3078	10.29	10.1442	9.80059	10.1457	10.3932	10.3141	10.1255	10.3041	10.5328	10.4632	10.6736	10.5108	10.6456	10.9336	10.6265	11.0425	11.0008
Q91Y86	3	Mapk8	1.6522e-08	8.14023	8.05517	8.11999	7.9967	8.34591	8.13461	8.09765	7.90675	8.24831	8.38537	7.90383	8.00223	7.64504	7.76703	7.80828	7.05742	7.36021	7.41089	7.12215	7.23758
Q91YD9	6	Wasl	0.000112897	3.84149	4.06975	4.3438	4.3237	4.59263	4.4699	4.53696	4.56456	4.18388	4.516	4.69195	4.39341	4.83723	4.55446	4.76456	5.17587	5.36008	4.6474	5.49818	5.43846
Q91YE6	8	Ipo9	4.29038e-07	7.6184	7.51538	7.34906	7.22636	7.13401	7.67825	7.94818	8.1315	7.95889	7.93329	7.85819	7.25068	7.95427	8.01098	7.75755	7.42272	7.53068	7.3068	7.55962	7.5502
Q91YJ2	5	Snx4	0.00258588	4.56652	4.83417	5.32437	4.20148	4.70959	5.36945	4.93532	4.59672	5.62962	5.54521	5.68584	5.97969	5.93903	5.59984	5.70187	5.15089	5.56027	5.75355	5.41073	5.31384
Q91YL2	3	Rnf126	0.270825	3.9846	4.23457	3.93777	3.66716	3.87361	4.18721	3.40786	3.41228	4.11845	3.1894	3.9285	4.44952	3.92997	3.79865	3.85219	2.99224	3.62555	3.30163	3.48304	3.33032
Q91YM2	4	Arhgap35	0.00153518	9.70818	9.68276	9.52925	9.58306	9.68734	9.78004	9.72116	9.61725	9.88126	9.92196	9.51564	9.39388	9.37941	9.50414	9.26015	9.06822	9.18092	8.95432	8.96129	8.99516
Q91YP2	3	Nln	0.0188679	7.91542	7.93803	7.83472	7.85985	7.93137	7.85909	7.57543	7.25173	7.92751	7.89136	7.24118	7.39548	7.11141	7.11831	7.20512	6.81764	6.74168	6.91833	6.62326	6.75676
Q91YQ5	3	Rpn1	9.77392e-08	7.1539	6.87554	7.50073	7.3901	7.25615	7.03509	7.20874	6.86008	6.81663	6.91086	6.86882	6.5896	7.13712	6.64792	7.15802	6.66293	6.37272	6.35691	6.50988	6.76116
Q91YR1	7	Twf1	1.88694e-07	7.17318	6.74977	7.11878	7.206	7.39744	6.91394	6.8804	6.52787	6.75888	6.87761	6.91439	6.73951	6.71269	6.58015	6.79305	6.91845	6.74328	6.68074	6.85258	6.79246
Q91YR7	3	Prpf6	0.00137372	5.53182	5.32229	5.41043	5.72117	5.49761	4.09668	4.13819	3.35585	3.99098	4.04885	3.6593	3.58345	3.85941	3.26904	3.97343	3.84221	3.60617	3.55505	3.50671	3.7953
Q91YS8	8	Camk1	0.00804448	5.30993	5.49102	5.80899	5.43379	4.60259	6.0914	6.25992	6.27981	6.20847	6.11069	5.80928	5.50783	5.91703	6.12345	6.06427	5.71592	5.81097	5.57855	5.77452	5.49158
Q91YT0	6	Ndufv1	1.92226e-08	6.64992	6.37352	6.85505	7.276	6.6463	7.08864	7.21234	7.12994	6.75513	6.83827	7.31163	6.40465	7.52245	7.29846	7.9888	8.47863	7.67778	7.77021	8.37132	8.35487
Q91Z31	3	Ptbp2	0.00128801	7.29094	6.63493	7.04553	7.17835	7.01813	6.15412	6.23282	5.69247	5.68949	5.93149	5.27767	4.91105	5.4199	5.08819	5.68769	5.56201	4.96056	4.74546	5.45372	5.65747
Q91Z38	2	Ttc1	0.00046745	6.82654	7.09761	7.04394	6.94375	6.66992	7.45083	7.33168	7.23094	7.64997	7.62188	7.67374	7.51624	7.49712	7.66039	7.63159	7.10777	7.11294	7.12805	7.26415	7.14257
Q91Z61	5	Diras1	7.35213e-07	4.77448	4.74328	5.59627	5.55457	6.14781	6.26825	5.88063	6.12917	6.28921	6.26592	6.64121	6.93798	6.38515	6.63721	6.56733	6.37678	6.49437	6.65907	6.64793	6.34672
Q91Z67	4	Srgap2	6.31678e-06	10.3961	10.3838	10.1593	10.1287	10.2183	10.435	10.5077	10.1242	10.3081	10.4274	9.65476	9.16753	9.11601	9.32277	8.96279	7.96543	8.06888	8.04195	7.71419	8.03065
Q91Z69	4	Srgap1	0.000140042	9.4807	9.69564	9.34374	9.3557	9.54297	9.08092	9.15492	8.82488	9.21937	9.29605	8.12322	7.86581	8.11462	7.93246	7.54932	7.03612	7.09538	7.11467	6.89058	7.002
Q91ZJ5	1	Ugp2	2.38464e-10	7.07327	7.02603	7.51027	7.01591	6.956	7.57028	7.43106	7.31626	7.30031	7.50981	7.30758	7.05219	7.44756	7.26891	7.68487	7.92092	7.40073	7.56501	7.61431	7.79114
Q91ZU6	5	Dst	0.00667476	8.29762	8.28879	8.61989	8.58885	8.25532	8.82505	8.71897	9.07081	9.05011	8.9785	9.40381	9.95671	10.1192	9.68159	9.92085	9.71236	10.0327	9.79043	10.0152	9.96452
Q91ZW3	3	Smarca5	0.255655	4.39474	4.32487	4.77861	5.03788	4.74177	3.35526	2.61672	2.66693	3.64874	3.70008	3.30067	3.49046	3.19559	3.35874	3.33098	3.13239	2.98277	3.26206	2.7196	2.66729
Q91ZX7	3	Lrp1	2.22705e-08	8.48128	8.55914	8.50945	8.86943	8.65503	8.06855	7.98976	7.67691	7.93036	7.89423	7.76656	7.53349	7.69892	7.4362	7.54362	7.27787	7.24877	7.39076	7.45608	7.53673
Q91ZZ3	5	Sncb	4.86729e-06	5.49386	6.1056	6.61497	6.47699	6.88902	7.69958	7.73102	7.94387	8.10105	8.45474	8.90494	8.70612	8.80149	9.17985	9.00683	9.21899	9.66601	9.53858	9.92237	9.70199
Q920E5	4	Fdps	1.48849e-08	9.74277	9.36764	9.51538	9.1919	8.87584	9.03159	9.53703	9.09657	9.18938	8.94138	7.95005	6.8931	7.41237	7.64866	7.56501	6.99861	6.8539	6.55187	6.50184	6.83261
Q920I9	5	Wdr7	7.77035e-09	6.72428	6.9764	7.50551	6.88291	7.25104	8.30108	8.28317	8.81017	8.43118	8.364	8.72875	8.5881	8.73279	9.04599	8.8416	9.02483	9.14827	8.8091	9.14935	9.04068
Q920N2	6	Hlcs	5.49134e-09	3.90412	3.81209	5.2705	4.77708	4.1351	4.11362	3.93658	4.27506	4.71698	5.00884	4.76118	4.718	4.76006	4.92472	5.07187	5.86055	5.67282	6.14053	5.46856	5.37543
Q920N7	5	Syt12	9.30442e-09	1.7449	2.43413	1.59909	2.3614	1.99205	3.93075	3.5893	4.38864	3.63828	3.99242	4.91432	4.64607	5.26582	5.18043	5.3685	5.6581	5.68261	5.51982	6.23316	6.10517
Q920P5	5	Ak5	0.000600872	4.09389	4.14158	4.44518	4.90155	3.8548	5.05854	4.66289	4.81798	4.99383	5.20343	5.47513	5.29853	5.07798	5.32942	5.12027	4.62203	5.0161	4.94843	4.79331	5.0681
Q920R0	4	Als2	0.000306339	5.48818	5.29898	5.26802	5.42546	5.44843	5.51643	5.76696	5.63123	5.5857	5.5895	5.39549	4.71894	5.35698	5.52487	5.34452	5.42872	5.89115	5.20658	5.53331	5.35509
Q921F2	3	Tardbp	0.232224	6.46303	5.84202	6.69274	6.72615	6.55216	5.72709	5.23246	4.52192	5.24753	5.42008	5.17772	5.227	4.98513	4.75478	5.22531	4.76534	4.5074	4.67582	4.72558	4.79261
Q921F4	3	Hnrnpll	0.116631	6.98723	6.59846	6.94355	7.3095	6.9151	6.29625	6.52128	6.49136	6.34928	6.12322	5.83003	5.74292	6.32708	6.08688	6.2673	5.87561	5.65595	5.53071	6.10365	5.94116
Q921G7	6	Etfdh	2.12073e-06	5.26984	3.43217	5.40577	5.37717	5.48804	4.90856	5.64431	5.92224	5.26927	5.00339	5.735	4.70485	5.50602	5.53957	5.98509	6.84016	6.58038	6.07401	6.45911	6.34946
Q921J2	8	Rheb	1.13428e-05	7.3344	6.83539	7.23836	6.88735	7.20326	7.06389	7.50387	7.73513	7.31869	6.99714	6.99229	6.5468	7.13235	7.15427	7.1999	7.03744	6.93952	6.6839	7.12443	7.0933
Q921M3	3	Sf3b3	0.00679103	6.73223	6.45799	6.81745	7.11749	6.30038	5.91537	6.10884	5.73735	5.94958	6.10794	5.6396	5.47909	5.71199	5.5193	5.89347	5.36189	5.22732	5.21933	5.59469	5.64019
Q921S7	3	Mrpl37	1.66128e-06	3.67221	4.51478	3.86482	4.74353	4.11785	3.72588	3.61079	3.37246	3.687	3.47985	3.72852	3.4887	3.78739	3.48981	4.13039	3.33268	3.89526	3.58335	3.7673	3.58595
Q921W0	3	Chmp1a	0.266793	5.58983	5.68246	5.48743	6.15859	6.30067	4.90704	4.69476	4.28295	4.6822	5.06111	4.64149	5.06902	4.39232	4.52285	4.4244	4.24117	4.09476	4.26171	4.20854	4.40815
Q922B2	3	Dars1	0.0206711	7.93385	7.72136	8.14692	8.04425	7.81794	7.57534	7.30934	7.20994	7.41638	7.38874	7.40592	7.65344	7.48824	7.2788	7.75387	7.28682	7.05963	7.42462	7.4584	7.34662
Q922E4	1	Pcyt2	0.000155654	5.68253	4.86514	5.91885	5.80401	5.09224	6.14981	6.73132	7.03635	6.0944	6.03718	6.56078	5.56467	6.35794	6.12379	6.41327	6.81008	6.68138	6.14514	6.3691	6.28479
Q922H1	3	Prmt3	0.302611	6.03033	5.58754	5.48765	5.52992	5.6937	5.57111	5.4636	4.85437	5.43692	5.56567	4.76789	5.35145	4.62446	4.68682	4.42408	4.21473	4.62132	4.33462	4.26139	4.47908
Q922H9	4	Znf330	0.00598078	5.77496	5.50936	5.88614	5.78151	5.85295	5.83191	5.61265	5.55159	5.94227	5.93974	5.67641	5.92565	5.82036	5.76071	5.65142	5.51878	5.65913	5.56384	5.44887	5.44784
Q922J3	8	Clip1	9.668e-06	8.7769	8.76665	8.9495	8.88147	8.62978	8.91279	9.10144	9.23756	9.1163	9.24725	8.91336	8.99454	9.03122	9.21057	9.12496	8.63747	8.98415	8.76861	8.90021	8.94622
Q922P8	4	Tmem132a	0.0362267	4.87566	5.88191	5.47378	5.26401	5.4065	5.38248	5.3606	5.44879	5.72342	5.75062	5.41254	5.83198	5.12069	5.55842	5.63368	4.69384	4.8395	4.78834	4.81552	4.88422
Q922Q8	3	Lrrc59	0.00350859	7.20117	7.29371	6.80391	7.18892	7.10775	6.28531	5.70213	5.52638	6.19912	6.05652	5.72298	5.79708	5.96792	5.94434	5.85308	5.33586	5.30089	5.93292	5.64277	5.68277
Q922R1	1	NA	0.00106651	4.69243	4.2017	3.94842	4.00925	4.15082	4.66027	4.72933	5.14714	4.61814	4.50122	4.54692	3.80547	5.27209	5.19403	5.52052	5.53571	5.28832	5.15977	5.63843	5.65748
Q922R8	3	Pdia6	3.53014e-07	6.41663	5.47809	6.67921	6.80744	5.96174	6.2183	6.13807	5.54585	5.52036	5.85309	6.17947	5.28326	6.39576	5.73136	6.08404	5.60445	5.16944	5.73792	5.77596	5.89205
Q922S4	5	Pde2a	0.00262041	8.37339	8.79456	9.11066	8.82577	8.89705	10.1175	10.1721	10.5289	10.273	10.3486	10.5752	10.5194	10.6878	10.9256	10.608	10.3757	10.3923	10.3284	10.4236	10.3881
Q923D2	6	Blvrb	1.96324e-09	3.52192	3.59067	4.02254	3.54922	4.21503	3.55052	3.19356	3.26304	3.69996	3.55467	3.87136	3.42786	4.21131	3.64011	4.17368	4.42092	4.10063	4.63062	4.17418	3.80482
Q923T9	5	Camk2g	0.17276	6.97442	6.98418	6.87306	6.96624	6.98694	7.64673	7.91404	8.30127	8.26343	8.077	8.17774	8.30504	8.44455	8.72165	8.82707	8.39716	8.8165	8.612	8.96885	8.7439
Q924C1	4	Xpo5	0.0100534	5.96605	6.1388	5.8382	5.76351	5.80593	5.61169	5.81288	5.61821	5.63495	5.99745	5.46151	5.14249	5.8996	5.62388	5.03642	4.64036	5.21755	5.10494	5.3532	5.30261
Q924T2	7	Mrps2	3.73671e-08	4.651	4.36308	4.68394	4.83432	5.32334	4.65325	3.85245	3.55038	4.32559	4.57384	4.45656	4.72069	4.47088	4.0479	4.27002	4.14301	4.2506	4.6082	4.18666	4.36604
Q924T7	2	Rnf31	0.00132967	5.37174	5.81371	5.55775	5.5429	5.94711	5.52234	5.38568	5.78976	5.53184	5.76719	5.8248	5.70513	5.61662	5.66837	5.63315	5.51045	5.68325	5.70996	5.40424	5.61257
Q925I1	6	Atad3	0.0817626	6.12583	6.17758	6.23799	6.85752	6.59464	6.24121	5.80513	5.24955	5.98285	6.01268	6.33216	6.71522	6.4208	6.10849	6.73158	6.88957	6.40257	6.87539	6.93662	6.91759
Q925N0	5	Sfxn5	0.741924	5.77113	6.44691	6.60292	6.03668	6.11581	7.11559	7.50959	8.01836	7.58185	7.09786	7.41348	6.92474	8.11616	8.2355	8.23431	8.21265	7.93499	8.00613	8.619	8.26985
Q925T6	4	Grip1	0.00185468	8.76903	9.00562	8.80397	8.47643	8.78523	8.98864	8.99282	8.7671	9.1243	9.17862	8.4509	8.04986	8.15707	8.16498	7.76985	6.98706	7.14509	7.09325	6.95119	7.09566
Q93092	3	Taldo1	1.31432e-05	7.08997	6.67805	7.60273	7.46808	6.64659	6.76587	6.90469	6.8248	6.20786	6.58484	6.71426	6.2733	6.47179	6.56989	6.97514	6.72148	6.22299	6.2961	6.36122	6.32031
Q99020	3	Hnrnpab	1.4216e-09	10.2543	9.8064	9.69352	10.2388	9.76099	8.37552	8.64033	8.12186	8.59977	8.58558	7.97368	7.54969	7.91979	7.96116	7.87986	7.74888	7.48754	7.43982	7.88834	7.76352
Q99104	5	Myo5a	0.0182914	11.2269	11.2604	11.3292	11.2536	11.279	11.5907	11.6347	11.7209	11.8591	11.9057	11.757	11.7882	11.9258	12.087	11.9594	12.0327	12.2466	12.0781	12.2878	12.2254
Q99J77	3	Nans	1.93846e-09	6.7979	6.71868	6.89088	6.76433	6.78601	6.33462	6.22702	5.77516	5.96272	5.95706	5.63552	5.45738	5.26791	4.87235	5.06647	4.69965	4.69425	4.64749	4.68187	4.7289
Q99JF8	3	Psip1	6.22647e-08	9.12374	9.30442	8.69635	9.4258	8.98561	7.47576	7.49174	7.5821	8.20696	7.80371	7.23449	8.25489	8.00566	8.0278	7.56943	7.71772	8.18946	8.00665	7.82131	7.861
Q99JI4	3	Psmd6	1.88312e-09	6.07058	5.61429	6.43675	6.52098	6.17655	5.89486	5.68476	5.25051	5.75702	5.49035	5.66219	5.81548	5.44831	5.41279	5.65891	5.12921	5.20024	5.44651	5.31705	5.43171
Q99JP7	5	Ggt7	0.000623849	4.2381	3.57391	4.57964	4.35219	4.32323	5.39383	5.73989	6.02314	5.56293	5.64394	5.72664	5.23599	5.37563	5.66663	5.26158	5.29896	5.68338	5.32215	5.45177	5.36252
Q99JR1	6	Sfxn1	0.332241	6.97573	7.15356	7.08834	7.23568	6.94012	6.98626	6.7763	6.63101	7.16905	6.99668	7.19927	7.32381	7.07935	7.16005	7.3264	7.64661	7.39662	7.37718	7.95422	7.85851
Q99JY0	6	Hadhb	1.71097e-06	4.12029	4.71112	5.00409	4.12593	4.42401	4.60982	5.10956	5.37645	4.83406	4.23652	4.836	4.04886	5.18809	4.82875	5.66189	5.71563	4.84406	4.59911	5.67746	5.55432
Q99JY9	4	Actr3	0.00015475	9.05373	9.0925	9.12406	9.07134	8.56074	9.0733	9.04529	8.70222	9.0129	9.14242	8.87107	8.82595	8.70747	8.7883	8.82217	8.74877	8.57607	8.68836	8.69993	8.73314
Q99K01	3	Pdxdc1	0.132749	3.84819	3.60822	4.15284	4.58216	4.24589	4.14554	4.02927	3.76166	4.06383	4.2967	3.66558	3.37709	3.49801	3.25913	3.50808	3.70246	3.73507	3.74652	3.67989	3.74257
Q99K48	3	Nono	0.00161617	8.0562	7.65544	7.95779	8.29449	7.88718	6.88296	6.85101	6.34532	6.56522	6.66331	6.27312	6.06374	6.43272	6.28104	6.5225	6.42598	5.7136	6.03551	6.24229	6.35577
Q99KB8	6	Hagh	3.51462e-08	3.15191	3.33174	4.28456	4.84983	3.79036	4.05616	3.88748	3.73965	3.49881	4.19339	4.60099	3.80337	4.37535	3.82053	4.79083	5.36288	4.89592	4.94198	4.982	4.872
Q99KE1	6	Me2	0.83775	4.54617	4.38382	4.5685	4.6298	3.8441	4.48892	4.62892	4.79323	4.54145	4.82917	5.2733	5.29723	5.68247	5.56595	5.90536	6.33955	5.85782	6.20318	6.47824	6.44597
Q99KI0	6	Aco2	0.00397735	9.38547	9.32429	9.95447	10.0627	9.92015	9.82335	9.80817	9.83382	9.6219	9.84106	10.4984	10.4593	10.6338	10.4971	10.9724	11.5187	11.1412	11.2016	11.6802	11.5612
Q99KJ8	4	Dctn2	6.4327e-08	8.9952	9.16314	9.18989	9.04802	9.06301	9.2894	9.10713	9.09676	9.13222	9.33243	9.15423	9.17653	9.14519	9.07492	9.08315	8.98785	9.00697	9.01363	8.88163	8.94601
Q99KK2	3	Cmas	6.87398e-08	4.43447	4.63369	4.59077	4.54729	3.96169	3.94432	3.70525	3.70367	3.89564	3.96135	3.11006	3.95305	3.73749	3.91862	4.14607	3.87459	3.27105	3.53409	4.4446	4.24329
Q99KK7	4	Dpp3	0.00333389	8.28733	8.33038	8.6967	8.57661	8.57963	8.62474	8.70226	8.41608	8.53801	8.78901	8.72431	8.40666	8.64496	8.4944	8.4068	8.37391	8.3526	8.28792	8.0263	8.33946
Q99KN9	6	Clint1	0.035568	6.62041	6.1858	6.65525	6.66708	6.29385	6.34384	6.57463	6.80393	6.4566	6.42129	6.58721	6.81734	6.74895	6.7021	6.94434	6.91235	6.62035	6.45692	6.85836	6.78036
Q99KP3	1	Cryl1	0.0216103	3.68042	2.78304	4.91493	4.64396	4.05307	5.04643	5.51575	5.58106	5.01791	5.05075	5.29331	4.77359	5.87692	5.55889	5.82094	6.20098	5.86035	5.65022	5.89856	5.73346
Q99KR7	6	Ppif	0.000321667	4.86992	3.8076	3.64354	4.47456	4.50288	3.56392	3.23856	2.85542	3.3084	3.4286	5.7103	6.17351	5.56847	5.35255	5.67074	6.48834	3.48508	3.7183	4.57118	4.70379
Q99KY4	5	Gak	0.000593514	7.65131	8.04433	7.97309	7.98562	8.03297	8.62443	8.34475	8.64181	8.7749	8.70644	9.09839	9.1075	8.87592	9.16217	9.07761	8.97106	9.18063	9.12157	9.0955	9.0536
Q99L43	1	Cds2	9.22528e-09	3.24192	3.3768	3.78888	3.27288	2.4758	2.97097	4.41264	5.23078	4.28985	3.49172	3.8856	3.36904	4.6037	4.74588	4.52366	4.80823	4.43773	4.44407	5.4453	5.09299
Q99L45	3	Eif2s2	0.095088	5.83865	5.5155	5.58571	5.97385	5.21438	4.67846	5.28367	5.06954	5.09561	5.15359	4.43376	4.60428	4.88111	5.05186	5.07172	4.43744	4.5255	4.73561	4.98394	4.42775
Q99L47	8	St13	0.00865994	8.87687	8.47672	8.84407	8.65555	8.46419	8.78544	8.91893	8.90454	8.6724	8.71829	8.61607	8.28516	8.56723	8.4456	8.61714	8.73128	8.50525	8.32245	8.47466	8.5009
Q99LC3	6	Ndufa10	0.000173943	7.67761	7.06328	7.90958	7.59506	7.36304	7.52207	8.03895	8.06028	7.24557	7.25696	7.81106	7.04491	7.9967	7.50995	8.63022	9.14327	7.91616	7.97545	8.98206	8.89093
Q99LC5	6	Etfa	0.0238979	4.67205	4.60948	5.72286	4.93857	3.97588	5.18086	5.34467	4.65393	4.33819	5.06435	5.349	3.91855	5.3244	4.79735	5.98024	6.33224	5.38429	5.55877	5.83512	5.97025
Q99LD8	3	Ddah2	0.0171946	7.78575	7.71118	7.60368	7.59211	7.65855	6.7097	6.56107	5.74595	6.27982	6.45197	5.62655	5.66955	4.80235	5.11497	5.09184	4.36681	4.24172	4.25909	4.02764	4.31906
Q99LF4	3	Rtcb	6.5595e-10	8.50399	8.17364	8.43662	8.59553	8.37203	8.00046	8.07093	7.86522	7.89238	7.95837	7.86242	7.45821	7.78929	7.38906	7.97594	7.95627	7.27071	7.21217	7.63538	7.81748
Q99LG2	4	Tnpo2	0.521687	5.49301	5.66704	5.53639	5.32149	5.41067	5.64422	5.74342	5.58445	5.58706	5.66935	5.2311	4.70054	5.08184	5.32696	4.98941	5.21098	5.33666	5.0853	5.23996	5.06249
Q99LI8	5	Hgs	0.000106955	9.3565	9.35269	9.35869	9.32053	9.46816	9.53292	9.62519	9.79763	9.81523	9.95637	9.84954	9.67236	9.78698	10.0285	9.8019	9.83144	10.0888	9.78416	10.0665	9.9551
Q99LJ0	4	Cttnbp2nl	0.644391	8.13854	8.06738	7.61481	7.67522	7.87893	7.7247	7.56937	6.99586	7.28256	7.49437	6.65274	6.1969	5.43815	5.98179	5.74627	4.96169	4.9763	5.18365	4.55768	4.8787
Q99LR1	1	Abhd12	3.72929e-05	5.27168	5.3679	5.57433	5.28649	4.91113	5.64257	5.15199	5.73018	5.76273	5.67445	5.9599	5.85454	6.51758	6.387	6.38783	6.01222	6.00776	5.92559	6.38432	6.24342
Q99LX0	7	Park7	5.26659e-09	7.93784	7.73578	8.23108	8.18575	8.24312	7.58066	7.7322	7.65635	7.52756	7.70641	7.92048	7.84635	7.92833	7.71756	7.98778	8.23799	7.78051	7.54836	7.7948	7.73954
Q99LX5	3	Mmtag2	8.0626e-05	5.36124	5.21412	4.6784	5.07098	4.38416	3.43181	3.99483	3.50243	3.85315	3.75539	3.58675	2.89971	3.69861	3.90079	3.75671	3.35682	3.46437	3.35219	3.64673	3.54697
Q99M71	6	Epdr1	0.0190542	2.89003	3.3934	4.05794	4.16355	3.57579	3.50848	3.17956	3.08992	3.42276	3.30626	4.18971	5.31556	4.64657	4.32506	4.83246	4.53212	4.78494	4.80206	4.73349	4.75185
Q99MB7	5	Rnf141	7.97886e-06	5.80721	5.91999	6.11687	5.77855	5.79798	6.07201	6.07709	6.19227	6.22335	6.2669	6.2647	6.18909	6.0836	6.43885	6.49072	6.40641	6.31522	6.47479	6.49872	6.51279
Q99ME2	4	Wdr6	2.07125e-05	4.71172	5.07307	5.02459	4.41973	4.81551	4.73792	4.85572	4.54229	4.87707	4.84797	4.1198	3.22991	3.63925	3.9449	3.70074	3.00769	3.44222	3.32381	2.73546	2.98596
Q99MI1	4	Erc1	4.82415e-05	9.82673	9.89573	9.94412	9.89826	9.95849	9.79693	10.1042	10.0989	10.435	10.3347	9.48267	8.78481	8.9935	9.4218	8.94023	8.89602	8.88507	8.43865	7.81744	8.12654
Q99MN9	6	Pccb	1.38315e-07	5.99441	6.16589	6.55895	6.68216	6.47022	6.18577	6.25577	6.12136	6.37137	6.42449	6.79844	7.03112	7.03875	6.8339	7.3631	8.10478	8.049	8.31499	8.48331	8.50495
Q99MR6	3	Srrt	1.64519e-06	7.06722	7.06406	7.02096	7.37939	6.97676	5.79177	5.70814	5.3965	5.84579	5.83141	5.35878	5.41594	5.70311	5.59066	5.60737	5.28153	4.55976	5.58833	5.54309	5.56138
Q99N28	1	Cadm3	5.49134e-09	5.91397	6.82473	6.61101	6.01108	6.21605	7.39572	7.65289	7.88064	7.74179	7.58641	7.4864	6.99361	7.564	7.8356	7.78679	7.78132	7.6061	7.47037	8.09078	7.87431
Q99N84	7	Mrps18b	1.51609e-07	4.36401	4.48209	4.56227	5.24902	5.41166	4.37994	4.18819	3.61226	4.27471	4.23936	4.06058	3.97637	4.35774	4.38366	4.19891	4.67859	4.14545	4.48449	4.34064	4.32621
Q99NB9	3	Sf3b1	6.05351e-06	6.11075	6.22031	5.97083	6.23496	6.10435	4.71768	4.4747	4.4556	5.04221	5.22485	4.30602	5.03862	4.80781	4.59978	4.62612	4.37279	4.31231	4.81327	4.83923	4.81319
Q99NE5	5	Rims1	0.0180844	7.58955	7.8556	8.14362	8.11376	8.0938	8.55233	8.54318	8.85151	8.95888	8.93988	9.09307	8.96166	8.74007	9.2112	9.06963	8.81172	9.18089	9.07023	9.17794	9.06927
Q99NF2	5	Nsmf	6.03682e-07	3.58464	5.73186	6.55463	5.73953	5.25158	7.51628	7.12998	7.50335	7.57936	7.72467	8.07921	8.45191	7.9767	8.17248	8.04884	7.30603	7.75878	7.69922	7.59017	7.58174
Q99P58	5	Rab27b	1.07796e-06	5.95116	5.83065	6.16036	5.7913	5.92295	6.42263	6.97498	7.15082	6.76274	6.57425	6.72241	6.39652	6.92454	7.03645	6.86397	7.10637	7.03017	6.88753	7.44345	7.57006
Q99P72	4	Rtn4	1.3035e-05	12.3507	12.0927	11.9568	11.912	11.8791	12.0501	12.5086	12.3722	12.4566	12.3696	11.4087	10.9533	11.2342	11.51	11.1133	10.6699	10.8245	10.5127	10.5804	10.5898
Q99PG2	4	Ogfr	1.14396e-05	8.23621	7.66341	7.85179	7.63094	7.06903	7.69499	8.82204	8.98639	8.42604	7.99649	7.23546	6.56026	7.60453	7.54207	7.51242	6.23864	6.22884	5.65767	5.89773	5.98996
Q99PJ0	5	Ntm	5.39539e-09	6.37928	5.97177	7.0074	6.7943	6.54254	7.534	7.44041	7.34014	7.27842	7.36075	7.80219	7.80187	7.90452	7.69851	8.55058	8.35218	8.00208	8.11431	8.68299	8.61423
Q99PL5	7	Rrbp1	3.69091e-06	8.54713	8.35688	8.6617	8.79065	9.10854	7.72314	7.87743	8.10911	8.12242	8.50449	7.85443	8.89759	8.5484	8.44824	8.42565	7.64994	7.9223	8.22004	7.45475	7.8361
Q99PL6	6	Ubxn6	1.3624e-06	6.14624	6.08601	6.47379	6.39817	6.30574	6.04979	6.07776	5.69406	5.82327	6.02739	6.27729	5.85936	6.15138	5.93651	6.52224	7.01747	6.41636	6.49704	6.86512	6.86318
Q99PV0	3	Prpf8	0.000415501	5.54186	5.03293	5.39927	6.0346	5.10836	4.25457	4.17323	4.15593	4.14574	4.14741	3.68353	3.03245	3.86998	3.68723	4.04268	3.80682	3.80017	3.24683	3.48983	3.75435
Q99PV8	3	Bcl11b	0.097288	5.8812	5.8934	5.09323	5.0293	4.75768	4.89172	4.64945	4.09269	4.58228	4.90196	3.8762	4.19758	4.69586	4.63927	4.63158	3.89981	4.20552	4.20642	4.93048	4.91652
Q9CPP6	6	Ndufa5	5.81832e-07	4.5994	4.29508	4.91558	5.24295	4.03407	4.13477	4.2047	4.16871	4.77869	4.60758	4.78488	5.27909	5.66277	5.08884	4.77181	5.6452	5.65675	5.68397	5.87795	5.82198
Q9CPR4	3	Rpl17	0.0137622	9.60132	9.5738	9.1177	9.7074	9.56327	8.40656	8.25205	8.38444	8.90158	8.80215	8.30373	8.8766	8.89532	8.87808	8.61013	8.2462	8.55342	8.64776	8.77143	8.7381
Q9CPT4	8	Mydgf	0.00010025	6.79305	6.75399	6.70749	6.88111	6.57168	6.79336	6.75667	6.80314	6.66424	6.7642	6.82177	6.32537	7.15269	7.10153	6.71359	6.53467	6.47331	6.44614	6.63839	6.63809
Q9CPV4	7	Glod4	6.33683e-05	6.79869	6.56927	7.13655	7.21649	6.92444	6.23804	6.20502	5.76461	5.78414	6.04873	6.08388	5.90841	5.89661	5.63989	6.13299	6.65383	6.40259	6.14808	6.13555	6.12989
Q9CPW4	3	Arpc5	0.153628	5.40715	5.62477	5.48459	5.73378	5.70993	4.93573	4.87006	4.79795	4.9224	4.91722	4.67967	4.63317	4.84594	4.79917	4.55735	4.24626	3.9694	4.4247	4.48141	4.06093
Q9CPX6	8	Atg3	2.81017e-05	7.77465	7.50925	7.71558	7.33658	7.08262	7.71699	8.06612	8.20404	7.99429	7.97483	7.56185	7.20584	7.75204	7.81941	7.72641	7.61136	7.65015	7.27305	7.62025	7.66682
Q9CQ54	6	Ndufc2	1.54138e-08	8.21595	8.60998	8.75352	8.58834	8.5979	8.49744	8.52637	8.75766	8.83311	8.44393	8.99728	9.17702	9.43894	9.62661	9.54591	9.73524	9.92256	10.0093	10.2753	9.99434
Q9CQ69	6	Uqcrq	0.0143849	6.36241	6.42732	5.97381	5.88852	5.87278	5.6675	5.76226	5.89222	6.32165	5.99337	6.27122	6.95507	6.98609	7.24811	6.90473	6.77166	7.10873	7.32507	7.86823	7.63174
Q9CQ75	6	Ndufa2	9.82548e-08	5.48543	5.81357	6.45121	6.66484	6.93005	6.30788	5.97268	5.93896	6.25132	6.45347	7.17077	7.66747	7.21298	7.2089	7.28576	7.61157	7.90407	8.21721	7.94443	7.94121
Q9CQA3	6	Sdhb	3.30286e-06	7.13893	7.11688	7.56832	7.36487	7.4054	7.29873	7.29875	6.88285	6.77961	6.98235	7.38607	6.767	7.30562	6.94152	7.73968	8.17279	7.46517	7.43119	8.06693	8.00574
Q9CQB5	7	Cisd2	0.394383	4.68661	3.53267	3.5656	4.02882	4.01625	3.07945	3.86603	4.25519	3.6503	3.57594	3.56248	3.5933	3.78364	4.06834	4.04662	4.0209	4.16	4.09989	4.53165	4.36335
Q9CQC7	6	Ndufb4	0.00714838	7.02635	7.53287	7.64994	7.8153	7.58829	7.72858	7.48216	7.83704	7.95627	7.69259	8.28495	8.59011	8.5842	8.77298	8.69852	8.94209	9.20481	9.5345	9.52229	9.30592
Q9CQD1	6	Rab5a	0.136076	6.79884	6.85387	6.55973	6.76026	6.69177	6.55187	6.45336	6.49144	6.58144	6.63401	6.71213	6.69709	6.72324	6.78858	6.82904	6.61672	6.6224	6.84484	7.09685	7.04801
Q9CQE8	7	RTRAF	3.64814e-08	4.09363	4.1027	5.16121	4.80332	4.87473	4.13653	3.69621	3.40538	3.29158	3.5273	3.50817	3.96588	3.18092	3.41862	3.62838	3.39348	3.3186	3.34154	3.06261	3.44721
Q9CQF0	8	Mrpl11	0.0225439	6.13443	5.93485	6.207	5.73068	5.70444	5.3601	6.00271	6.13008	5.87336	5.74979	5.14139	5.1941	5.85617	5.9116	6.02153	5.41213	5.38601	5.40143	5.72213	5.54122
Q9CQH3	1	Ndufb5	0.000129552	6.77798	6.8797	6.95022	6.71617	6.47522	6.6292	7.35166	8.20522	7.36715	6.78043	7.04263	6.67949	7.71131	7.80416	7.9795	8.38663	8.09834	7.34787	8.70992	8.26799
Q9CQI3	5	Gmfb	0.117727	4.00274	3.85579	4.80268	4.64397	5.03368	4.67202	4.17758	3.82116	4.42412	5.14048	5.32324	5.54246	5.05233	4.80744	4.75682	5.03608	5.1648	4.92435	4.60324	4.9003
Q9CQI6	3	Cotl1	0.00464707	8.84398	8.75641	8.84459	8.90001	8.85968	8.7027	8.60014	8.34157	8.56525	8.70924	8.17633	7.86816	8.03074	8.16486	7.90135	7.92458	7.74041	8.09183	7.86624	7.92583
Q9CQJ8	6	Ndufb9	0.0585884	4.77486	4.14414	4.60055	4.62128	4.9648	4.82287	4.87441	4.79678	4.90906	4.75725	5.13725	5.23318	5.56295	5.47147	5.50675	5.77399	6.00783	5.96806	6.4663	6.1827
Q9CQM9	4	Glrx3	3.07222e-08	9.32892	8.95105	8.84889	8.7284	8.32622	8.95497	9.23935	9.31329	9.26602	9.06047	8.5514	8.36178	8.5501	8.90372	8.65123	8.05629	8.26497	7.89526	8.16645	8.07737
Q9CQN3	6	Tomm6	3.1162e-05	3.70192	4.70838	4.2228	4.63718	3.92513	4.44584	3.64128	4.49659	4.72909	4.42847	4.4745	4.53085	4.95623	4.9897	4.71957	5.00078	4.92114	5.02881	5.42035	5.00677
Q9CQQ7	6	Atp5pb	0.314433	7.82783	7.50588	8.24123	8.10676	7.61009	8.11525	8.108	7.90383	7.87612	7.924	8.28314	8.28486	8.6878	8.47576	9.24	9.39555	8.7359	9.00196	9.79142	9.60101
Q9CQR2	3	Rps21	0.00611168	6.32704	6.22904	6.15315	6.69715	6.76328	5.12748	4.55655	4.01914	5.5609	5.3295	5.06061	5.48083	4.98166	5.69482	4.50414	4.34951	4.63351	4.36143	3.67225	3.80332
Q9CQR4	6	Acot13	3.09278e-05	5.15251	4.58005	5.70765	5.06578	5.25398	5.51587	6.02378	6.43033	5.9606	5.49358	5.98643	4.54115	6.84235	7.05052	7.10858	8.37766	8.05453	7.97158	8.63788	8.28635
Q9CQS4	6	Slc25a46	1.20158e-05	3.9933	1.88898	3.53832	2.97282	4.19534	3.66915	3.70489	4.37653	3.92679	3.2065	4.03427	4.38257	4.39014	4.54188	4.88272	4.87079	4.90535	4.87371	5.40313	5.18629
Q9CQS8	3	Sec61b	0.920154	5.52282	6.51841	5.72494	6.04836	6.1446	5.10655	4.45402	4.52461	5.04543	5.008	4.77015	5.15721	4.79118	5.04991	4.73819	3.8864	4.57325	5.00463	4.58285	4.43518
Q9CQV8	1	Ywhab	0.00103948	8.77184	8.27554	8.85961	8.5126	7.86667	8.75877	9.33223	9.29786	8.89343	8.8454	8.72381	8.05745	8.92047	8.85718	9.1409	9.3211	8.80185	8.62101	9.19466	9.01755
Q9CQW1	4	Ykt6	3.26167e-05	8.73531	8.59656	8.70068	8.64389	8.32408	8.73263	8.75694	8.53176	8.63343	8.57814	8.29495	7.61853	8.16221	8.31918	8.39594	8.16394	7.94373	7.89459	8.26716	8.18158
Q9CQW2	5	Arl8b	0.0768252	7.41856	7.20008	7.67652	7.71191	7.85251	8.34639	8.07419	8.41723	8.34552	8.34412	8.68566	8.47092	8.77867	8.81365	8.7766	8.53811	8.69396	8.65586	8.72626	8.69852
Q9CQX2	6	Cyb5b	0.000699881	4.55534	3.82653	4.65938	4.95972	4.82716	4.14841	4.49805	3.56613	3.84298	4.154	4.56778	4.2408	4.25843	4.34869	4.28704	4.93253	5.49456	4.98165	5.14739	5.17936
Q9CQZ6	6	Ndufb3	1.30091e-07	5.02862	5.61765	5.47964	5.22078	5.22856	4.86848	5.32078	5.6729	5.51507	5.26244	5.88293	5.70337	6.20962	6.35702	6.3057	6.57552	6.66244	6.6671	7.09943	6.88223
Q9CR16	6	Ppid	0.000483887	6.15722	5.09758	6.08461	5.81085	5.40208	5.83066	5.89705	5.71295	5.48099	5.57837	5.69767	5.58638	5.6112	5.55909	5.92426	6.21406	6.04162	5.69595	6.06718	5.88378
Q9CR26	3	Vta1	8.11452e-07	8.11308	8.23852	8.05032	8.28113	8.42348	8.04383	7.70626	7.45023	7.93212	7.98872	7.93529	7.96885	7.43435	7.62116	7.48347	7.66752	7.84215	7.86888	7.67944	7.71219
Q9CR51	4	Atp6v1g1	0.296814	5.11344	4.34781	4.82511	5.45259	5.0137	5.16172	4.85863	4.74082	5.0918	4.7748	4.67961	4.63307	4.8396	4.70955	4.76012	4.24531	4.66586	4.3924	4.36076	4.34413
Q9CR62	6	Slc25a11	0.00322245	7.02158	7.02913	7.2867	7.56622	7.42796	7.45459	7.2412	7.44479	7.67863	7.50054	8.02312	8.23798	8.39937	8.51105	8.52758	8.9092	9.1195	9.33249	9.6129	9.39632
Q9CR68	6	Uqcrfs1	0.0105776	7.86681	7.98336	8.33812	8.40651	8.39913	8.19241	8.11029	8.24666	8.26584	8.21924	8.53648	8.86817	8.92131	9.07859	9.06813	9.56632	9.57717	9.71126	9.98459	9.84961
Q9CR84	6	Atp5mc1	7.35399e-09	7.84078	8.33693	8.40505	8.61677	7.97741	8.24755	8.22748	7.8708	8.10095	8.46642	8.74227	8.42394	8.82234	8.78672	8.69407	9.00208	8.81741	9.3887	9.42397	9.42693
Q9CR95	5	Necap1	1.71865e-08	6.40715	6.39763	6.88467	6.65734	6.47548	7.23111	7.46356	7.69109	7.4193	7.14224	7.70336	6.99751	7.97688	8.02252	7.98805	8.47762	8.20061	8.22624	8.63302	8.43691
Q9CRB6	4	Tppp3	6.42444e-07	8.10129	8.49336	9.05352	8.45744	8.82721	9.40261	9.39028	9.47048	9.76942	9.85239	9.21125	9.19294	9.27967	9.34624	9.2587	8.12881	7.87538	7.93003	7.80367	8.06832
Q9CRB9	6	Chchd3	0.0641137	8.03419	7.53783	8.23479	8.45176	8.2296	8.04484	7.84487	7.60136	7.62107	7.84728	8.40949	8.01302	8.37154	8.06383	8.67607	9.2432	8.88734	8.86206	9.19431	9.30893
Q9CRC8	3	Lrrc40	1.15608e-07	6.30011	6.35595	6.22263	6.16758	5.8213	5.78045	5.6223	4.91636	5.78811	5.56516	5.4976	5.37414	5.24967	5.06202	5.32736	5.08353	5.00765	5.37721	5.03696	5.09088
Q9CRD0	6	Ociad1	1.11247e-05	6.27837	6.11881	6.15419	6.40046	6.60171	6.06775	5.87958	5.96934	5.94697	6.01643	6.17388	6.12821	6.18829	5.98226	6.19142	6.18072	6.15502	6.15911	6.41858	6.34604
Q9CRY7	3	Gdpd1	3.128e-05	5.91015	6.89199	6.21149	6.35723	6.66618	6.09354	5.72571	5.52306	6.03116	5.84575	5.80217	5.51652	5.6019	5.71562	5.63007	5.773	5.59432	5.58609	5.55719	5.65698
Q9CS84	8	Nrxn1	0.0054898	7.65586	7.79941	7.75928	7.62315	7.51733	8.69922	8.65946	8.62061	8.80536	8.58247	8.09732	7.23306	7.79375	8.18155	7.8779	7.66144	7.76053	7.59548	7.67786	7.54544
Q9CVB6	6	Arpc2	0.000390654	8.58601	8.24114	8.45674	8.62951	8.28387	8.57212	8.71933	8.61084	8.41911	8.23703	8.3713	7.89123	8.57973	8.46064	8.79439	8.83683	8.29484	8.43102	9.18285	9.0618
Q9CWE0	7	Mtfr1l	3.25793e-06	5.85149	5.94144	5.90359	6.09653	5.90711	5.89445	5.67812	5.57067	5.8926	6.09947	6.07986	6.17157	5.90724	5.9756	6.08461	5.70555	5.73217	5.82992	5.81722	5.92029
Q9CWF2	4	Tubb2b	0.264369	8.65841	8.27553	8.31234	8.36858	7.55295	8.25132	8.81964	8.02974	7.91384	8.04767	7.14019	6.06994	6.60306	6.7794	6.6304	5.44658	4.3101	5.00854	4.6831	4.93159
Q9CWJ9	3	Atic	0.0430601	6.66632	6.24613	6.65151	6.72949	6.64906	5.97976	5.94521	5.15372	5.51598	5.85152	5.47642	4.57482	5.21037	5.1089	5.34331	5.69834	5.29399	5.38344	5.47473	5.47655
Q9CWM4	3	Pfdn1	8.74384e-09	8.17158	8.25475	8.14559	8.40434	9.32206	7.4116	6.77989	6.28768	7.02812	7.29399	6.6072	7.38607	6.6123	6.56684	6.5337	6.44466	6.4434	6.85027	6.29801	6.52877
Q9CWS0	7	Ddah1	6.3788e-06	7.89504	7.43691	8.23939	8.15942	7.84946	7.14802	7.01286	6.54334	6.5429	7.01419	7.21678	7.14815	6.88498	6.75096	7.29886	7.53684	6.86597	7.18867	6.9028	6.98639
Q9CWZ7	5	Napg	6.7019e-06	9.13016	9.0686	9.33844	9.12467	8.98491	10.0587	10.2947	10.7211	10.2759	10.14	10.2857	10.112	10.2924	10.6343	10.6292	10.6445	10.5161	10.2638	10.7345	10.5268
Q9CX00	4	Ist1	0.000162286	7.38576	7.34898	7.11622	7.27398	7.56635	7.45133	7.39171	7.20224	7.57383	7.66253	7.6927	7.16651	7.17532	7.36573	7.14458	6.89341	7.19594	7.216	6.96094	6.91563
Q9CX34	5	Sugt1	1.2948e-07	8.12604	8.12105	8.58714	8.01741	8.13523	8.57529	8.67405	8.71587	8.66545	8.66365	8.65252	8.59999	8.83633	8.6902	8.91785	9.08933	9.05851	8.91867	9.06037	9.07248
Q9CX86	3	Hnrnpa0	0.0199315	9.42249	9.08002	8.78511	9.32388	8.67158	7.54814	8.18028	7.79489	7.89376	7.62673	6.88266	6.64456	7.27778	7.55597	7.31236	6.87381	6.59286	6.76534	7.07292	6.78202
Q9CXJ4	6	Abcb8	4.84215e-08	2.61781	4.21459	4.11161	3.91698	3.71255	4.23715	4.01334	4.21385	4.4229	4.44737	4.63617	4.91783	5.19623	5.10442	4.77388	5.3193	5.61305	5.855	5.86451	5.78526
Q9CXS4	7	Cenpv	0.449292	6.45341	7.22185	6.81284	7.1278	7.36977	5.87996	4.89782	4.91858	5.68572	5.69006	5.42749	6.23111	5.69867	5.83518	5.62071	5.73218	6.00966	6.60975	6.23361	6.24345
Q9CXW3	3	Cacybp	5.0545e-06	5.3546	6.40394	5.88734	5.96844	6.02408	5.78474	5.57911	5.34147	5.65101	5.62489	5.15713	5.7865	5.26398	5.28698	5.48676	4.9732	5.14426	5.64476	5.43033	5.4167
Q9CXW4	3	Rpl11	6.18107e-05	5.46091	5.92101	5.68434	6.03292	6.24699	5.01741	4.72333	4.20464	4.09999	5.00698	4.72344	4.36075	4.52416	4.44098	4.11459	3.92305	4.08064	4.39235	4.03177	4.43701
Q9CXZ1	6	Ndufs4	0.016265	8.61845	8.09837	8.50313	8.91725	8.53057	8.18971	8.4801	8.48579	8.60435	8.47055	8.51053	8.8001	9.37474	9.30023	9.25912	9.74749	9.70337	9.34753	10.001	9.89367
Q9CY27	7	Tecr	2.65015e-06	7.45556	7.14017	7.41097	7.39509	7.14781	7.02595	6.99995	7.43074	7.39467	7.15972	7.2768	7.2859	7.69252	7.68678	7.52471	7.29979	7.21129	7.19363	7.46546	7.29742
Q9CY58	3	Serbp1	1.23398e-05	9.78991	9.90951	9.49262	10.3175	10.3025	8.47782	8.21777	7.91252	8.55144	8.6053	7.79649	8.53427	8.29614	8.40512	7.81525	7.11448	7.79259	8.12871	7.60055	7.7373
Q9CY64	6	Blvra	0.103915	5.88991	5.4953	6.54244	6.19722	6.56241	6.37699	6.13303	5.827	5.91971	6.18661	6.49554	6.22164	6.11989	6.14205	6.69453	6.9492	6.61848	6.89529	6.95183	7.03706
Q9CYR6	3	Pgm3	0.00255098	5.2855	5.58405	5.31528	5.24242	5.42068	4.67715	4.83408	4.46988	5.01154	4.93383	4.85507	4.88098	4.33856	4.48998	4.30134	4.34691	4.33516	4.69995	4.18404	4.25372
Q9CYT6	5	Cap2	0.632156	5.89217	6.07778	7.19738	6.90912	6.84175	7.83046	7.86174	8.50104	7.9291	7.97076	8.83167	8.99795	8.90741	9.01287	9.24503	9.51939	9.64312	9.34855	9.64283	9.5697
Q9CYZ2	5	Tpd52l2	2.09926e-05	2.29499	3.8742	3.2771	3.4607	2.7774	3.80569	3.30965	2.75841	3.55924	2.88827	3.90831	3.08956	3.34936	3.64532	4.05517	4.03842	3.76306	4.01303	3.97847	3.92727
Q9CZ04	6	Cops7a	1.13797e-08	3.30436	3.53846	3.39065	3.88688	3.09063	3.48023	3.63138	3.24686	3.05061	3.02656	3.5404	1.34129	3.40396	3.22468	3.75879	4.31003	3.78678	3.50628	3.90865	3.78157
Q9CZ13	6	Uqcrc1	0.0437743	7.88008	7.96226	8.99806	8.62539	8.59916	8.61324	8.49571	8.38453	8.04666	8.49635	8.97617	8.86382	8.86029	8.73861	9.3791	9.93185	9.28671	9.5693	9.71748	9.80197
Q9CZ44	4	Nsfl1c	0.714077	9.3043	9.34042	9.17344	9.02759	9.33634	9.0527	9.00483	8.92625	9.26545	9.38022	8.98257	9.1933	8.88097	8.97853	8.89293	9.01014	9.22729	9.06275	9.09177	9.11335
Q9CZC8	4	Scrn1	0.585509	7.62752	7.77855	8.15403	7.41375	7.52671	7.65307	7.94362	8.17061	7.97746	7.97538	7.52068	7.71378	8.06437	7.91065	7.94033	7.75147	7.70438	7.39589	7.48736	7.48449
Q9CZD3	3	Gars1	0.0840926	9.15896	9.3641	9.0213	8.89983	9.01353	8.2349	7.85349	7.19955	8.18396	8.18058	7.34633	7.56324	7.68397	7.07091	7.2486	7.20011	7.211	7.55562	6.98029	7.06007
Q9CZM2	3	Rpl15	0.0768252	7.9707	8.04109	7.39733	7.21253	7.86675	6.36623	6.12887	5.71641	6.44659	6.5749	5.75951	6.33896	6.43099	6.32406	6.04172	5.30339	6.2185	6.12454	6.11272	6.16562
Q9CZS1	7	Aldh1b1	2.63874e-07	6.78326	5.75094	5.70481	5.56116	5.78745	4.67218	4.86962	5.2529	4.56984	4.96359	4.3209	4.82079	5.00665	4.91539	5.25894	5.31143	4.97606	5.07738	5.35174	5.51491
Q9CZT8	1	Rab3b	5.22094e-06	7.18282	6.78012	7.03896	6.53678	6.79363	7.63516	8.30678	8.71519	8.09512	7.72914	7.57816	6.93229	8.06864	8.13255	8.2805	8.02322	8.11534	7.42112	8.59532	8.36382
Q9CZU6	6	Cs	0.000773426	8.08904	8.00412	8.55748	8.66959	8.28284	8.34745	8.28481	8.07041	7.95763	8.31846	8.6649	8.4151	8.72841	8.48552	9.21341	9.37566	8.82498	9.03844	9.5249	9.4751
Q9CZW5	5	Tomm70	0.00142113	7.66929	7.64172	8.19006	7.99246	7.80833	8.35932	8.54426	8.84558	8.24208	8.3685	9.02243	8.66732	9.31606	9.05243	9.67786	10.0276	9.73191	9.57455	10.1605	10.1158
Q9CZX8	3	Rps19	0.000127341	7.08988	6.76699	6.66005	6.8841	6.92518	5.99572	5.89379	5.56473	5.82122	5.55527	5.33265	4.75341	5.47751	5.45946	5.29275	5.1926	4.89257	4.6734	5.12158	4.98568
Q9CZY3	6	Ube2v1	1.30091e-07	7.23081	7.07667	7.44493	7.22212	7.27148	7.36465	7.2832	7.29212	7.29932	7.32656	7.4481	6.96411	7.53983	7.56002	7.59726	7.76216	7.64356	7.74772	7.87019	7.75469
Q9D051	6	Pdhb	1.72688e-08	7.37245	7.10116	8.28438	7.78775	7.75659	8.05845	7.95179	7.74358	7.35781	7.78111	8.31363	7.55655	8.2725	7.89913	8.84959	9.47442	8.68516	8.8249	9.21558	9.40344
Q9D0E1	3	Hnrnpm	0.000593207	8.34856	8.23255	8.2466	8.55641	8.08156	7.20119	6.84124	6.27851	6.70995	6.92162	6.67301	6.74244	6.97589	6.86909	6.82872	6.51677	5.81089	6.26667	6.47329	6.6003
Q9D0F9	6	Pgm1	0.000175478	4.58961	5.81972	5.83775	5.91763	5.23017	5.55447	5.29221	5.74829	5.7473	5.58218	5.65051	5.57695	5.98964	5.86439	6.00482	6.62612	6.43502	6.60748	6.76793	6.6288
Q9D0G0	3	Mrps30	6.59152e-08	3.73864	3.97839	3.88664	4.5604	3.98096	3.52214	3.15687	2.9753	3.12055	3.692	3.63448	2.92557	2.97094	3.08654	3.44826	3.52356	2.95053	2.95032	3.66881	3.28659
Q9D0I9	7	Rars1	0.00304356	6.72293	6.7748	6.9584	6.91889	7.02006	6.68345	6.58653	6.45071	6.48668	6.71644	6.3388	6.48295	6.55883	6.57546	6.46646	6.62135	6.83916	6.77505	6.70192	6.70618
Q9D0J4	3	Arl2	0.336549	4.36104	4.96127	5.09773	5.03803	5.07307	4.6851	4.91735	4.44728	4.29678	4.42234	4.50566	3.58801	4.14312	4.08559	4.13207	4.34811	3.61083	4.3451	4.05346	4.07709
Q9D0K2	1	Oxct1	0.00023174	6.73695	6.52908	7.29286	7.2335	6.99181	7.19276	7.35953	7.30829	6.85559	7.00881	7.51815	7.21002	7.6682	7.35024	8.07624	7.64703	6.80736	6.9468	7.38307	7.29951
Q9D0M3	6	Cyc1	0.0488547	7.682	7.95784	8.04573	8.17313	7.76953	8.06431	8.31487	8.49972	8.18296	8.03598	8.45827	8.17669	8.95554	8.91837	9.1865	9.71149	9.61167	9.41865	10.0834	9.90745
Q9D0R2	7	Tars1	0.938006	4.74212	5.54588	5.12935	5.2234	5.3176	4.12969	4.1457	3.80183	4.37791	4.61752	4.63698	4.7509	4.4819	4.40578	4.69907	4.40658	4.48348	4.72293	4.83022	4.7303
Q9D0R8	3	Lsm12	3.91829e-07	6.86741	6.91557	6.89192	7.02358	7.24148	6.56963	6.28257	5.98362	6.53268	6.39965	6.32485	6.4405	6.30781	6.19251	6.39739	6.00767	5.94808	6.127	6.01956	5.96922
Q9D0S9	6	Hint2	0.000175982	3.26927	3.57999	4.12719	4.28866	4.48769	3.88384	3.66077	3.91662	3.8841	4.06637	4.52031	4.96255	4.46578	4.50556	4.60675	5.4222	5.42733	5.5286	5.50138	5.55132
Q9D0T1	3	Snu13	8.45776e-07	5.91659	5.59453	5.88537	6.10099	6.07407	4.48506	3.98377	3.81531	4.22794	4.16405	4.04279	3.83763	3.85451	3.4422	4.08764	3.65423	3.44322	4.05891	3.7606	3.90288
Q9D0W5	3	Ppil1	1.07915e-06	6.68245	6.17175	6.27825	6.68637	6.37257	5.86274	5.62129	5.26096	5.67403	5.69686	5.34965	4.92189	5.29164	5.2507	5.04632	5.31021	5.12673	5.20708	5.06168	4.97548
Q9D164	3	Fxyd6	5.39539e-09	4.20237	4.7209	4.44817	4.63506	4.05629	3.23848	3.96809	4.06396	3.76135	3.37944	3.51156	2.42398	3.47884	3.53259	3.07008	3.14115	3.50999	2.67001	3.4497	3.23104
Q9D172	6	Gatd3a	1.65818e-07	7.28231	7.17669	7.99851	7.88735	8.04903	8.01006	7.79686	7.71631	7.79335	8.02061	8.83978	8.76262	8.85666	8.67612	9.33426	9.9386	9.28155	9.49801	9.87814	9.79524
Q9D1A2	5	Cndp2	0.000370707	6.59159	6.31736	6.72226	6.24404	6.65014	7.03562	6.83974	7.04104	6.93541	7.03706	7.01557	6.83821	7.10546	7.02211	6.92826	6.83023	6.77704	6.55349	6.86148	6.81449
Q9D1D4	3	Tmed10	1.03433e-07	5.67013	5.2614	5.32929	5.55883	5.48278	4.77254	5.35118	5.59544	5.12264	4.8737	4.5787	4.60871	4.74289	4.94667	4.98475	4.8221	4.68541	4.50149	4.95733	4.54745
Q9D1E6	3	Tbcb	0.000246851	8.5542	8.81378	8.53692	8.63003	8.63356	8.37061	8.26763	8.07502	8.57105	8.51757	7.95213	8.09723	7.64032	7.95967	7.61213	7.31598	7.50872	7.45719	7.38092	7.42624
Q9D1G1	1	Rab1b	0.000433546	6.11444	5.34881	5.78882	5.77352	4.70784	6.36407	6.58331	6.76204	6.58745	6.25493	6.46434	5.63311	6.89061	6.92087	6.90625	6.82149	6.5908	6.35656	6.96507	6.87639
Q9D1G5	6	Lrrc57	6.34113e-08	5.82116	6.19627	6.56958	6.13523	6.45271	6.55792	6.3468	6.32953	6.21171	6.42571	6.80461	6.82265	7.10163	6.90304	7.27138	7.66718	7.22687	7.23319	7.33727	7.42574
Q9D1H6	6	Ndufaf4	0.00226992	5.47237	5.36805	5.67372	5.89124	5.91791	5.72761	5.17271	5.00243	5.40574	5.40555	5.8572	6.12429	5.89049	5.87095	6.05856	6.40896	6.16193	6.80826	6.72815	6.66006
Q9D1K2	6	Atp6v1f	1.48488e-06	4.44817	4.86581	4.58014	4.81508	4.7795	4.48612	3.97389	3.85013	4.68826	4.33877	4.89019	5.44101	5.45742	5.2218	5.37524	5.33437	5.38288	5.34649	5.62162	5.43552
Q9D1L0	3	Chchd2	8.627e-06	7.42025	7.28044	7.23117	7.50366	7.98562	6.06327	6.08751	5.79249	6.37065	6.44443	5.95834	6.25286	6.31057	6.23873	5.96681	5.92009	6.12679	6.10587	5.80261	5.82025
Q9D1P4	6	Chordc1	5.96364e-06	5.33891	5.55598	5.40738	5.62962	5.37059	5.15913	5.56342	5.58907	5.41046	5.58725	5.70951	5.41892	5.59569	5.809	5.81074	5.97437	5.66935	5.59906	5.95258	5.86431
Q9D1Q4	3	Dpm3	1.75562e-07	5.94087	5.97634	5.85438	6.21898	6.00132	5.29991	4.96525	5.16048	5.32765	5.13334	5.12913	5.00188	5.16528	5.43704	5.07634	4.89897	4.98278	5.2871	5.11731	5.03784
Q9D1Q6	3	Erp44	0.0104327	4.36145	4.47119	4.57699	4.67838	4.35197	3.98247	3.82892	3.20376	3.51728	3.66698	3.6333	3.92059	4.3426	3.94632	4.0894	3.13131	2.67214	3.74428	2.99181	3.52421
Q9D1R9	3	Rpl34	3.17161e-07	9.45423	8.97385	8.79274	8.8834	9.45587	7.58452	7.51251	7.14181	7.4919	7.61438	6.61942	7.0994	7.56881	7.53383	7.31103	6.93566	7.59628	7.41888	7.23299	7.28513
Q9D2G2	6	Dlst	1.9654e-07	5.28128	4.58216	5.62643	5.48314	5.42585	5.56351	5.89574	5.82418	5.10247	5.46785	5.97391	5.02282	5.79897	5.54421	6.37486	7.13437	6.23212	6.34433	6.92421	6.88601
Q9D2M8	7	Ube2v2	0.242994	5.47717	5.93492	5.82353	6.1764	5.88391	5.43329	5.22233	5.09775	5.29759	5.34237	5.21695	5.6376	5.40229	5.46821	5.3462	5.43773	5.55143	5.65777	5.67433	5.57953
Q9D328	3	Tmem35a	0.580991	6.51752	7.14182	6.63992	7.41084	7.6449	5.9949	5.59937	5.36207	5.90097	6.03235	5.51702	5.83229	5.39949	5.67279	5.10569	5.20354	5.48836	5.51975	5.26737	5.14329
Q9D358	6	Acp1	0.122824	5.85843	6.05434	6.2475	6.66402	6.61236	6.43334	6.41939	5.89477	6.04378	6.00009	6.19606	5.98087	6.46668	6.23599	6.21254	6.75764	6.70699	6.70814	6.65897	6.82875
Q9D394	4	Rufy3	2.66613e-06	10.1972	10.3595	10.2705	9.85795	9.63066	10.2497	10.1467	9.9803	10.2929	10.4119	10.0787	10.1028	10.1242	10.1263	10.0774	9.48554	9.80601	9.8968	9.62766	9.6291
Q9D3D9	6	Atp5f1d	0.00676732	6.25995	5.77421	7.05829	6.32072	6.81113	5.43312	5.26343	5.70706	5.32451	5.81488	6.00861	7.18086	6.25943	6.469	6.0557	6.7398	6.81258	7.20575	6.5574	6.73634
Q9D486	4	Cmip	0.000779062	6.4677	6.387	6.28224	6.43976	7.11425	6.43292	6.39555	6.59439	6.36643	6.52822	5.99369	5.76414	5.88731	5.71995	5.6398	5.03206	5.18161	5.19796	5.19483	5.16956
Q9D4H1	8	Exoc2	0.233782	4.93648	4.73941	4.67138	4.45254	4.26519	4.63839	4.91035	5.26421	4.7429	4.65715	4.5227	3.04797	4.32691	4.30975	4.38398	4.54666	4.6488	3.51555	4.45541	4.47592
Q9D4H8	5	Cul2	4.96725e-08	7.72924	7.89934	7.84658	7.87064	7.91159	8.31741	8.06709	8.17485	8.41486	8.4161	8.22604	8.25416	8.34184	8.45142	8.22136	8.25781	8.16144	8.17694	8.27875	8.31043
Q9D517	5	Agpat3	0.0794275	3.25633	3.33002	3.0776	2.54546	3.71553	2.73883	3.6936	3.88388	3.71618	3.38451	3.43383	3.46593	3.6187	4.06501	3.76816	3.31526	3.51992	3.45081	3.56399	3.48676
Q9D5V5	6	Cul5	0.214898	6.48662	6.57316	6.79603	6.85034	6.73636	6.72566	6.59498	6.64659	6.6036	6.59801	7.17134	6.69118	6.99989	6.99166	7.03012	7.03827	7.1587	7.07984	7.26692	7.19519
Q9D6E4	4	Ttc9b	0.39809	4.98873	5.46101	5.73544	5.63525	4.94338	5.2663	5.23559	4.99142	5.56637	5.42086	5.04278	4.91697	4.80247	5.0732	4.89392	4.50624	4.79669	4.34551	4.45172	4.75126
Q9D6F9	6	Tubb4a	4.3895e-05	7.43834	7.45254	7.65709	7.63583	7.63171	7.52089	7.71595	7.61751	7.73538	7.71179	8.03456	8.27137	8.5642	8.0237	8.70395	9.12972	8.99128	8.80148	9.13213	9.13827
Q9D6J5	6	Ndufb8	0.000489481	5.64379	6.09143	5.87481	6.18761	5.89793	5.98452	5.676	6.07613	6.21575	6.21671	6.45406	6.77027	6.75133	6.73275	7.03329	7.14054	7.21224	7.48134	7.62694	7.53027
Q9D6J6	6	Ndufv2	2.03917e-08	4.66258	3.89649	4.50795	4.67253	3.87107	3.94511	4.60114	4.27824	4.26726	4.73203	4.73502	4.27905	5.41314	4.97794	5.42561	6.00955	5.11521	4.85439	5.64159	5.30814
Q9D6M3	5	Slc25a22	1.07919e-07	4.31263	4.9055	4.87452	4.75945	4.66721	5.33317	5.56736	5.52402	5.57325	5.46724	6.2672	5.78429	6.80523	6.50115	7.21705	7.27685	6.63086	6.80682	7.6783	7.44605
Q9D6R2	6	Idh3a	0.00324863	6.84155	6.30472	7.74964	7.45167	7.13137	7.39148	7.34717	7.05881	6.58233	7.17181	7.81138	7.37424	7.65966	7.38575	8.28392	8.83919	7.87624	8.23656	8.49871	8.52683
Q9D6Y9	5	Gbe1	2.98866e-07	5.81684	6.3928	6.00315	5.94082	6.48224	6.82036	6.69548	6.99522	6.85467	6.91775	7.07114	7.30265	7.74121	7.23018	7.29265	7.00079	7.10601	7.16745	7.03491	6.84435
Q9D6Z1	3	Nop56	0.000553003	4.16451	4.30664	4.33987	4.53739	4.42043	3.34091	3.09503	2.96916	3.40755	3.07194	3.30537	3.51449	3.16117	3.0571	3.28732	3.00029	3.0383	3.6087	3.29201	3.22831
Q9D7A8	1	Armc1	2.38688e-07	3.77649	4.30134	5.02632	4.69774	4.3242	4.89273	5.0425	5.21961	4.73716	4.92392	5.2751	4.87031	5.1758	4.82545	5.56865	5.72978	5.26289	5.5199	5.80028	5.72318
Q9D7E4	3	NA	0.785513	3.73843	3.5604	3.68593	3.98192	3.24152	3.01185	2.83634	2.51573	3.05223	2.39408	2.65254	3.206	3.13818	2.90388	3.05446	1.97392	2.74097	2.29989	2.30524	2.78927
Q9D7G0	6	Prps1	0.000351349	5.06584	4.7916	5.04199	4.7882	4.21026	4.91417	5.07116	5.05178	4.73928	4.65597	5.09097	4.08786	5.09278	4.80946	5.25944	5.56219	5.12477	5.02859	5.44507	5.36454
Q9D7S9	3	Chmp5	7.56361e-05	6.04562	5.94207	6.06536	6.61169	6.3404	5.21254	5.41366	5.56213	5.83792	5.24885	4.9446	5.27487	5.38892	5.18922	5.09904	5.08594	5.26543	5.01437	5.17078	5.32346
Q9D7X3	5	Dusp3	0.0948246	4.47904	3.77621	5.14063	5.18672	5.1899	5.68424	5.38664	5.58459	5.61271	5.72323	6.46386	6.86548	6.43469	6.53607	6.70196	6.64614	6.85197	6.88653	6.94454	7.00204
Q9D7X8	1	Ggct	6.20093e-06	5.67021	5.52797	6.59169	6.354	6.4589	6.42552	6.91781	7.55371	6.53055	6.11519	6.54025	6.73734	6.66589	6.85336	6.93039	6.83582	6.74535	6.52237	6.80501	6.69254
Q9D819	4	Ppa1	3.93259e-07	8.04479	8.14252	8.21707	7.75272	7.37679	8.04884	8.28494	8.34555	8.24629	8.19326	7.68795	7.55963	7.83718	7.90609	8.04846	7.47122	7.04071	6.98638	7.36301	7.2321
Q9D855	6	Uqcrb	0.0610295	7.34705	7.26814	7.37853	7.62465	7.36175	6.55885	6.63817	6.69605	6.9079	6.82044	7.00967	7.64989	7.79536	7.626	7.60083	8.31481	8.11949	7.97425	8.35721	8.48527
Q9D880	7	Timm50	6.45569e-05	6.15153	5.61946	6.32043	6.29116	5.87407	5.70542	5.55116	5.12735	5.34306	5.43611	5.38962	5.52614	5.41854	5.06366	5.64757	5.62047	5.25986	5.80869	5.88485	5.9137
Q9D898	6	Arpc5l	0.00434054	4.00741	3.9031	4.54747	3.71031	4.13392	3.82574	3.67718	3.9198	3.60291	3.64793	3.29379	4.52281	4.33478	4.17831	4.36378	4.9502	4.80307	4.67282	5.24704	5.23766
Q9D8B3	3	Chmp4b	0.856887	6.17662	5.97659	6.19525	6.33911	6.2688	5.54569	5.50194	5.41583	5.78086	5.5584	5.17314	5.35101	6.08178	5.86503	5.89001	5.25909	5.60604	5.6351	5.5657	6.17394
Q9D8B4	6	Ndufa11	0.0002053	4.94913	4.83244	4.74555	4.65346	4.4776	4.38453	4.36238	4.47082	4.5516	4.53606	4.57012	5.00318	5.13685	5.18585	5.18208	5.44697	5.23256	5.65392	5.76654	5.70482
Q9D8B7	6	Jam3	0.0106714	2.23289	3.71354	3.10306	3.28844	2.80891	2.89652	3.23866	4.2885	2.96169	3.1291	4.31039	4.52707	5.13355	4.96747	5.48798	5.75493	5.63808	5.68035	6.12492	6.19728
Q9D8E6	3	Rpl4	3.17207e-06	10.0379	9.77858	10.0144	9.63016	9.83291	8.23519	7.89471	7.55038	8.12999	8.5175	7.42164	8.4276	8.75045	8.47526	8.31854	8.30829	9.06373	8.99534	8.58898	8.35919
Q9D8N0	3	Eef1g	4.85312e-07	6.56155	6.70611	6.6079	6.72084	6.49342	5.42077	5.96366	5.80469	5.51813	5.68929	5.28467	5.0544	5.57286	5.21439	5.77587	5.63713	4.81666	4.78708	5.33764	5.41543
Q9D8U8	6	Snx5	3.53729e-06	3.48572	4.23084	4.0942	3.1626	3.29922	3.64269	4.06314	4.44613	2.97606	3.6987	3.08312	3.42898	4.10421	3.64242	4.55859	4.9398	4.15162	3.94809	4.94466	4.82874
Q9D8W7	5	Ociad2	0.133622	3.18582	3.84272	4.63642	4.74866	4.89474	5.1646	5.09616	5.52077	5.36236	5.57924	6.43967	6.99308	6.87835	7.05767	6.77372	7.21123	7.41148	7.77854	7.82421	7.62259
Q9D8X2	3	Ccdc124	0.0566388	5.4853	5.3122	4.94517	5.38114	5.80181	3.95287	3.48314	3.20035	3.96721	4.12719	2.85896	3.3952	3.40916	3.66093	3.08687	2.34808	3.44697	3.54291	3.02809	2.57764
Q9D8Y0	6	Efhd2	3.40921e-08	5.42923	4.99647	6.10742	5.91299	6.28146	5.43734	5.32073	5.49687	5.55055	5.81749	6.28895	6.51831	6.54639	6.54651	6.65703	7.98032	7.90096	7.69539	7.41001	7.40212
Q9D906	1	Atg7	7.00937e-07	6.85291	7.08213	7.22356	6.7929	6.8502	7.43937	7.45884	7.40757	7.58495	7.60011	7.45131	7.14705	7.4095	7.40143	7.47546	7.60921	7.47677	7.36875	7.50854	7.44393
Q9DAK9	2	Phpt1	3.33098e-05	7.05187	6.82916	7.16924	7.07312	7.09921	7.97574	7.72549	7.41025	8.04352	7.87317	7.9505	7.86793	7.76663	7.75132	7.69866	7.37068	7.42754	7.41719	7.28508	7.30725
Q9DAS9	6	Gng12	2.68572e-06	4.86785	5.48892	6.20745	5.5223	5.82038	5.97809	5.51097	5.53188	5.82403	6.19949	6.63665	6.92328	6.90514	6.96963	6.98286	7.10302	7.13768	7.67895	7.40299	7.49524
Q9DB05	5	Napa	0.175107	5.30995	5.77633	6.39414	5.85778	6.2086	6.3726	6.16779	6.44273	6.02665	6.18813	6.61793	6.86536	6.40301	6.49081	6.86607	6.87633	6.76162	6.78524	6.88645	6.87108
Q9DB15	7	Mrpl12	8.64911e-07	5.65236	5.17301	5.88315	6.17001	5.88786	4.83757	4.71033	4.29002	4.43012	4.76844	5.03171	5.44309	5.29881	4.84163	5.03079	5.41219	4.49975	5.21416	4.56044	4.79484
Q9DB20	6	Atp5po	0.000188646	5.68449	5.61602	5.94542	5.811	5.78038	5.81548	5.815	5.91695	5.92626	5.71027	6.22129	5.76255	6.776	6.49784	6.86004	7.23634	7.01847	7.23837	7.64762	7.31922
Q9DB60	8	Prxl2b	0.000455982	6.75396	6.92659	7.1355	6.73863	6.78113	7.09217	7.27642	7.18407	7.27318	7.1995	6.91043	6.6817	6.9204	7.12582	7.11182	6.86128	6.82097	6.54988	6.81287	6.96116
Q9DB75	5	Cdip1	7.86983e-07	3.19919	4.26772	4.26719	3.03791	4.58215	4.40185	4.43841	4.52024	4.81981	5.15813	5.40602	5.90293	5.11972	5.40192	5.42734	5.32007	5.90011	5.96898	5.59247	5.5713
Q9DB77	6	Uqcrc2	0.00432233	7.94009	7.61875	8.64467	8.38634	8.01588	8.24322	8.33624	8.17888	7.77381	8.17038	8.60802	8.23369	8.80706	8.62794	9.30654	9.86577	9.08711	9.28003	9.79591	9.70389
Q9DBC7	1	Prkar1a	4.33767e-05	5.74677	5.72613	5.28027	5.47249	5.89794	6.17347	6.41174	6.67238	6.4524	6.44319	6.01834	5.87404	6.52687	6.64959	6.69811	6.45167	6.49776	6.23326	6.90052	6.64291
Q9DBE8	3	Alg2	3.42075e-05	3.42218	3.51717	3.74284	3.9769	2.46762	2.8289	2.68005	2.94981	3.34303	3.09442	2.85662	3.40496	3.03376	2.63709	2.83175	1.44131	2.58623	2.22809	2.86305	2.86966
Q9DBF1	6	Aldh7a1	0.000419441	4.01963	3.79531	3.53684	3.55192	3.74308	3.65134	2.607	2.87713	3.15762	3.212	3.35051	3.96915	3.53077	3.12426	3.91221	4.24724	3.93566	3.35161	4.18015	4.30603
Q9DBG3	5	Ap2b1	0.0260863	7.84586	7.99273	8.14409	8.03051	7.97803	8.74046	8.88054	8.96859	8.7514	8.92885	9.04517	8.46937	9.17451	9.27333	9.18625	9.57617	9.51692	9.28796	9.57356	9.52713
Q9DBG6	8	Rpn2	0.0077473	6.86503	6.74894	6.61612	6.54471	5.89689	6.2854	6.86155	7.19314	6.58445	6.10484	6.1731	6.12042	6.54183	6.64756	6.81178	5.83739	5.91267	5.52128	6.45668	6.28326
Q9DBJ1	6	Pgam1	6.92908e-08	8.14501	8.09941	8.70008	8.67791	8.64967	8.65616	8.5991	8.36194	8.39077	8.59859	9.14618	8.945	9.03008	8.73604	9.39314	9.69074	9.15944	9.41274	9.7393	9.70461
Q9DBL1	7	Acadsb	0.0947217	3.88105	3.53466	4.12305	4.04514	4.247	3.68782	3.91155	3.3842	3.35342	3.56629	3.51798	3.06478	3.66723	3.46834	3.57568	4.12759	3.47639	3.74625	3.92918	3.99422
Q9DBL7	1	Coasy	1.33728e-05	4.32399	4.29157	4.14974	4.19584	3.387	4.95063	4.98038	5.27262	5.37651	5.27492	5.03496	4.22667	5.24477	5.23012	5.02458	4.59415	4.40722	4.40969	4.63846	4.79795
Q9DBP5	3	Cmpk1	0.0215238	8.31565	8.50593	8.4877	8.39933	8.68011	8.15983	8.01012	7.72239	7.98547	8.28103	8.25007	8.37224	8.33978	8.15349	8.09622	7.85988	8.0165	7.90347	7.65527	7.83948
Q9DBR7	5	Ppp1r12a	0.000373535	7.44999	7.29354	7.3306	7.55927	7.45202	7.63968	7.6733	7.95603	8.23209	8.13116	7.78728	8.16559	8.27278	8.33143	8.2025	7.63673	8.15093	7.85605	8.08319	8.12491
Q9DBS1	3	Tmem43	0.000101464	5.05422	5.13754	4.8867	5.12246	4.92707	3.90922	3.88129	3.77641	3.96391	4.06483	3.33226	2.98357	3.66836	3.91325	3.34472	4.0664	3.76847	3.65922	3.18018	3.26186
Q9DBS5	3	Klc4	0.000495329	6.47183	6.23568	6.10631	6.29801	6.95189	5.83523	5.28685	5.04863	5.91466	5.78679	5.20936	5.76103	5.38408	5.05299	5.12777	4.72378	5.19939	5.32157	5.09127	5.00694
Q9DBT5	4	Ampd2	8.32491e-07	7.30396	7.36692	7.19288	7.3333	7.24041	7.2354	6.90067	6.88966	7.15761	7.3696	7.06249	7.10876	6.75891	6.91613	6.78429	7.24887	7.40936	7.2156	7.18515	7.32635
Q9DC07	5	Nebl	4.68103e-05	5.56091	5.4566	6.73049	6.3315	6.65215	7.40898	7.41339	7.83939	7.46579	7.78046	8.18946	8.67974	8.91571	8.58555	8.36699	9.10561	9.37736	9.03309	9.2292	9.15795
Q9DC16	4	Ergic1	0.0042498	6.88185	6.62973	6.68124	6.69483	6.1929	6.32893	6.44542	6.2826	6.49197	6.15286	6.38099	5.5223	6.33373	6.38814	6.49332	6.16268	5.99613	6.07794	6.49014	6.32401
Q9DC51	4	Gnai3	1.94451e-08	8.61898	8.30822	8.03464	8.11775	8.05042	8.20959	8.01537	7.86807	8.0361	7.88809	7.70399	7.07795	7.67491	7.74338	7.76298	7.74637	7.71339	7.45457	7.6426	7.5498
Q9DC53	4	Cpne8	0.102982	8.23781	8.01198	5.83009	8.11793	6.99965	7.32432	7.062	6.45702	7.40608	6.94003	5.81376	4.47005	6.09853	6.29052	5.4011	5.4529	5.02143	5.4218	5.33307	5.30629
Q9DC69	6	Ndufa9	0.000655455	6.26977	6.43094	6.6308	6.54818	6.35253	6.59727	6.87214	7.18191	6.9461	6.74263	7.03399	6.90466	7.61594	7.61578	7.7981	8.0238	7.90687	8.11458	8.55691	8.38333
Q9DC70	6	Ndufs7	0.000290446	4.05102	4.05948	4.70299	2.85957	4.63408	4.06695	5.27806	5.82296	4.91043	4.36711	4.63353	4.07605	5.38275	5.43022	5.44821	5.87644	5.57765	5.50927	6.24181	6.27372
Q9DCB4	4	Arpp21	5.98604e-07	4.97554	5.30898	5.2419	5.48655	5.63536	5.98841	5.48244	5.38633	5.77938	5.84378	5.58938	6.44107	5.66501	5.46364	5.24985	4.82672	5.21837	5.42123	4.92281	5.14112
Q9DCD0	4	Pgd	0.0036076	8.45879	8.18233	8.351	8.37493	8.11341	8.38682	8.49738	8.328	8.54773	8.16397	8.09064	7.34845	8.14549	8.0211	8.03782	8.06015	7.7231	7.6362	7.8555	7.72948
Q9DCJ1	6	Mlst8	0.0260033	5.81017	5.13138	5.45892	5.82117	5.57542	5.59349	5.454	5.57962	5.61232	5.71474	5.79023	5.57934	5.83601	5.63124	5.94589	6.11513	5.83681	5.62532	5.90338	6.14644
Q9DCJ5	6	Ndufa8	0.00149227	5.0155	4.97487	5.64883	5.36101	5.81109	5.57209	5.48225	5.61796	5.51367	5.60119	6.06827	5.47331	6.19656	5.97534	6.36677	6.89529	6.75667	6.59631	6.92052	7.00079
Q9DCL9	4	Paics	0.0428067	6.50687	6.01473	6.31314	6.32071	5.86135	6.26246	6.26085	6.17327	6.01223	5.97985	5.6718	5.2729	5.77024	5.49921	5.36971	5.61743	5.58665	4.46662	5.21855	5.28884
Q9DCN2	4	Cyb5r3	2.16068e-06	7.95969	7.61968	7.79592	7.7983	7.3945	7.46582	7.92081	8.02012	7.6814	7.21894	7.24984	6.40243	7.47435	7.58997	7.49525	7.71265	7.25247	7.18765	7.96883	7.7609
Q9DCP2	1	Slc38a3	0.00024217	5.59316	6.31531	6.48529	6.07736	5.528	7.07271	7.66892	8.02972	7.58627	6.97572	6.91459	5.85981	7.32263	7.5644	7.71566	7.44213	7.56802	7.17154	7.91285	7.56813
Q9DCS9	6	Ndufb10	0.000861273	6.88611	6.89633	7.3274	7.61643	7.37857	7.37224	7.24011	7.11815	7.12694	7.27544	7.74498	7.76735	7.87118	7.82966	8.142	8.4539	8.36415	8.53409	8.79196	8.70437
Q9DCT2	6	Ndufs3	0.840716	4.29434	4.23067	5.5636	4.744	4.71324	4.88512	5.08795	4.54365	4.28732	4.66642	5.06341	4.74586	5.06144	4.73965	5.77166	6.10213	5.27414	5.72265	5.91585	6.08229
Q9DCT8	4	Crip2	1.52359e-07	8.53532	8.80851	8.97276	8.6669	8.83881	8.97225	9.10095	9.1795	9.46165	9.52514	8.88757	8.60831	8.58792	8.9809	8.72979	8.07328	8.34732	8.10481	8.14797	8.35743
Q9DCW4	6	Etfb	0.00207701	6.86976	6.30682	6.97957	7.2812	7.05314	6.79403	6.41468	6.25782	6.27232	6.39975	7.03251	6.80756	6.94386	6.60304	7.28605	7.64384	7.10988	7.28114	7.6817	7.52924
Q9DCX2	6	Atp5pd	4.1017e-06	7.02546	6.48498	7.50062	7.32674	7.0983	6.74385	6.84881	6.66416	6.75638	6.80123	7.36395	7.65727	7.726	7.53092	7.92005	8.51064	8.04818	8.28229	8.26945	8.39719
Q9DCZ4	6	Apoo	0.000459833	7.35636	7.74379	7.71493	8.0931	8.21975	7.77751	7.33602	7.38347	7.70923	7.80135	8.25554	8.50843	8.32729	8.3773	8.53672	8.80938	9.12676	9.34915	9.39196	9.39248
Q9EP69	6	Sacm1l	3.26973e-07	5.52442	4.958	5.33001	5.28693	4.9532	5.32275	5.39007	5.57615	5.69866	5.37124	5.49695	4.98134	5.98824	5.80202	5.89203	5.76435	5.85151	6.23182	6.41352	6.12333
Q9EPE9	4	Atp13a1	0.332818	4.76861	4.06891	4.69965	4.60863	4.39213	4.68352	4.32869	4.45251	4.70147	4.76152	4.572	4.25942	4.54106	4.6719	4.49201	4.1717	4.03427	4.21047	4.05429	4.23346
Q9EPJ9	5	Arfgap1	0.00226388	5.70141	5.47677	6.23859	5.66981	6.46117	6.53006	6.90587	7.60592	7.02558	7.07039	7.51462	7.72954	7.68496	7.86221	8.04807	8.17046	8.19633	7.67321	8.16996	8.11148
Q9EPK7	6	Xpo7	0.0111462	5.17127	5.89469	5.21755	5.03188	5.66147	4.96043	5.29254	5.36669	5.41213	5.43336	5.16452	5.76368	5.40395	5.45414	5.55618	5.58786	5.95859	5.73232	5.88715	5.7829
Q9EPL8	4	Ipo7	2.42066e-07	8.74601	8.79303	8.81351	8.78242	8.91081	8.92405	8.82372	8.7072	9.0859	9.17061	8.73348	8.91505	8.91115	8.90674	8.64076	8.4995	8.80162	8.61614	8.60252	8.65266
Q9EPN1	4	Nbea	0.0352997	10.0746	10.0509	9.9329	9.79618	9.74908	10.0428	10.232	10.2891	10.3035	10.2633	9.86214	9.60642	9.80789	9.93492	9.77066	9.38937	9.65034	9.28233	9.39009	9.53642
Q9EPU0	3	Upf1	0.0179711	7.10052	7.06216	6.75578	6.89918	7.07796	6.81351	6.64162	6.67637	6.68583	6.93343	6.52141	6.51785	6.92782	6.43821	6.28785	6.50683	6.72233	6.65752	6.70303	6.69393
Q9EPW0	5	Inpp4a	2.3278e-06	7.11924	7.31905	7.32377	6.9648	6.79797	7.61895	7.6678	7.56081	7.67544	7.72345	7.63745	7.63203	7.57745	7.67695	7.55527	7.42998	7.71213	7.49946	7.69081	7.62569
Q9EQ06	6	Hsd17b11	0.00440772	2.56498	2.71817	2.64763	2.27667	3.59783	2.53029	1.85917	2.40457	3.00176	3.12761	2.53093	2.98525	3.13843	3.11146	3.31919	2.53547	3.3935	4.28691	3.48396	3.28715
Q9EQF6	4	Dpysl5	0.102957	11.2376	11.0035	11.3301	11.379	11.1023	10.9648	10.9952	10.4881	10.6165	10.8866	10.3876	10.1461	10.131	10.0492	10.2467	9.31778	8.99475	9.05911	9.05322	9.23731
Q9EQH3	5	Vps35	0.267255	6.47959	6.99195	7.42027	7.32714	7.17902	7.79287	7.79623	8.00545	7.85972	7.84766	7.92142	7.55384	7.75145	7.96976	7.75366	7.87989	7.98299	7.73968	7.81104	7.76205
Q9EQJ9	4	Magi3	6.23697e-10	6.52889	6.57991	6.46408	6.23671	6.34963	6.5647	6.61963	6.78099	6.79151	6.78702	6.527	6.53439	6.34997	6.41583	6.21477	5.78745	6.14053	5.69771	5.91604	5.90572
Q9EQQ9	3	Oga	0.000101305	9.57325	9.96829	9.58229	9.46409	9.5625	9.40135	9.14001	8.79627	9.31036	9.42963	8.81093	8.83422	8.21585	8.66967	8.40541	8.19686	8.42282	8.13317	8.00375	8.24477
Q9EQZ6	5	Rapgef4	2.15225e-06	6.64702	6.81781	6.8414	6.80866	7.00162	7.35422	7.23433	7.45024	7.43619	7.25094	7.66658	7.31399	7.70935	7.82805	7.72308	8.2163	8.24767	8.04273	8.54744	8.28189
Q9EQZ7	5	Rims2	4.28032e-07	5.16137	4.87263	4.73692	4.04334	4.68656	5.02658	4.97634	4.7063	5.58838	5.51293	5.07569	5.73937	5.39562	5.60065	5.53175	5.23687	5.56456	5.66967	5.87033	5.56135
Q9ER00	4	Stx12	1.41111e-08	9.01173	9.15378	8.81442	8.8953	8.65824	8.78322	9.06832	9.01844	8.97001	8.77585	8.44669	7.80408	8.33956	8.63916	8.35336	8.34982	8.40757	8.2227	8.517	8.44152
Q9ER72	3	Cars1	0.00361731	7.24556	7.10955	7.1219	7.15322	7.36755	6.55924	6.50953	6.2128	6.65725	6.80661	6.31115	6.14839	6.0384	5.98351	6.02614	6.06672	6.05994	5.9253	6.29324	6.21912
Q9ER73	3	Elp4	0.000235793	4.73368	4.77395	4.89972	4.98634	5.19216	4.45818	4.63173	4.57603	4.73485	4.8857	4.03274	4.34319	4.34279	4.18494	4.26996	3.48121	4.36148	3.8535	3.63901	3.99067
Q9ERB0	4	Snap29	7.8511e-08	9.17018	8.89925	9.10662	8.95309	8.85273	9.14393	9.25508	9.40147	9.61029	9.44086	9.08133	9.01991	8.81932	9.10489	8.91832	8.1621	8.29887	7.97815	7.93446	8.12482
Q9ERD7	4	Tubb3	1.28366e-05	9.59968	9.2013	9.12287	9.00479	8.91596	9.30394	9.67199	9.35797	9.45815	9.18676	8.41339	7.63676	8.38968	8.40421	8.37909	8.22905	7.99053	7.85174	8.16681	8.08978
Q9ERI6	6	Rdh14	2.28414e-08	7.00987	7.62043	7.33834	7.32116	7.3961	7.54012	7.24033	7.48832	7.73441	7.49773	7.83878	7.93504	8.06086	8.21616	8.10011	7.75623	8.03088	8.32998	8.36672	8.24024
Q9ERK4	3	Cse1l	7.78654e-07	6.54042	6.64227	6.75216	6.77542	6.83475	6.35615	6.3797	6.56015	6.71182	6.6849	6.24646	6.64748	6.33238	6.46812	6.46496	6.4701	6.45277	6.4363	6.53947	6.48759
Q9ERL9	4	Gucy1a1	3.32136e-05	9.28075	9.16793	8.53365	8.46212	8.20533	7.96346	8.54328	8.32797	8.35216	8.03323	6.78314	6.367	6.66371	6.82669	6.457	6.07115	6.14895	6.09994	6.11971	6.15777
Q9ERR1	2	Ndel1	0.0223424	6.80851	7.0232	7.22922	7.30332	7.18878	7.99373	7.6318	7.79496	7.70823	7.89556	8.14789	8.19399	7.4082	7.69653	7.59947	7.54002	7.55217	7.37134	7.00358	7.22989
Q9ERS2	6	Ndufa13	3.77087e-09	6.32428	6.84899	6.99589	7.0813	7.24843	6.86693	6.80498	6.76826	7.13017	6.84382	7.44496	8.01286	7.79514	7.92647	7.87633	8.13326	8.2982	8.64399	8.73803	8.46864
Q9ERU9	3	Ranbp2	0.000715838	5.3612	5.70391	5.53976	5.65405	5.76725	4.92319	4.80216	4.37021	4.76849	4.97957	4.60783	4.83854	5.27282	4.74099	4.5237	4.75627	4.50899	4.62699	4.82265	4.87618
Q9ES00	4	Ube4b	2.0065e-07	7.01065	6.82649	6.73701	6.50142	6.97036	6.74778	6.79082	6.54391	6.75886	6.68977	6.27034	5.65711	6.32099	6.07779	5.93357	5.57918	5.77745	5.63983	5.68618	5.54603
Q9ES28	4	Arhgef7	3.42802e-05	9.25299	9.19712	9.18899	9.25041	9.29018	9.38295	9.52504	9.58348	9.52379	9.59307	9.38958	9.32077	9.19054	9.42597	9.2665	8.98062	9.10424	9.01977	8.94776	9.00384
Q9ES97	5	Rtn3	1.98431e-07	6.91008	7.31219	8.06146	7.85363	7.64791	9.59152	9.77591	10.5032	10.1038	10.1752	10.2051	10.5438	10.4471	10.6545	10.6806	10.0142	10.1964	9.76832	10.1682	10.1386
Q9ESK9	8	Rb1cc1	3.39956e-07	7.86961	7.73523	7.77173	7.53404	7.20096	8.07971	8.26523	8.34218	8.42277	8.16789	7.91481	7.61962	7.87938	8.10283	7.98573	7.76947	7.95538	7.52209	7.79255	7.73263
Q9ESN6	3	Trim2	5.63438e-09	8.76081	9.12078	9.20956	8.80447	9.00609	8.77737	8.56727	8.35273	8.79009	8.99073	8.65065	8.65739	8.43604	8.44365	8.56259	8.62059	8.58873	8.58343	8.42866	8.45272
Q9ESN9	2	Mapk8ip3	0.00077604	8.66779	8.82282	8.72609	8.62627	8.5402	8.98071	8.99773	9.11643	9.17758	9.30544	8.99318	9.02202	8.98467	9.16071	8.90011	8.49224	8.85509	8.44485	8.63317	8.58551
Q9ESW4	6	Agk	0.00350132	5.73801	6.02319	5.61235	5.644	5.68922	5.45087	5.6359	5.81707	5.67715	5.27383	5.7248	4.96297	5.86186	5.71662	6.21387	6.03035	6.0792	5.67172	6.25222	5.97032
Q9ESX4	3	Zcchc17	2.69269e-05	6.55177	6.98879	6.78196	6.82221	6.67283	5.56315	5.77338	6.28361	5.89098	5.99005	5.7924	6.08849	5.76974	6.4081	6.34332	5.7641	5.74591	5.68916	5.76985	5.96594
Q9JHK4	1	Rabggta	0.166055	5.91421	5.77416	5.9285	6.15024	5.27956	6.1495	6.09738	5.90085	6.27257	6.38129	6.25231	5.83026	6.01938	6.18649	5.83525	6.15231	6.05203	6.31878	6.16729	6.26817
Q9JHL1	2	Slc9a3r2	2.98315e-05	4.25718	4.55369	4.65397	4.92046	4.98121	5.17357	5.14898	5.18378	5.52568	5.30222	5.20386	5.18492	5.65067	5.53998	5.25527	4.30218	4.36404	4.44811	4.403	4.87852
Q9JHQ5	3	Lztfl1	0.0577687	5.0868	4.92897	4.59089	4.72624	4.4843	4.00492	4.59207	4.89208	4.38301	4.3821	3.9103	4.20719	4.44105	4.11856	4.23558	4.44214	3.6728	4.33131	4.18866	3.96018
Q9JHR7	4	Ide	3.99329e-05	7.41236	7.5631	7.76699	7.77556	7.33087	8.18404	8.39161	8.4498	8.16809	8.17731	7.84267	7.16615	7.67181	7.84469	7.59631	7.14599	6.93181	6.69225	6.83771	6.96258
Q9JHU2	5	Palmd	0.00885886	3.56592	2.70672	3.17039	2.91888	4.28471	4.87572	4.53545	5.17743	4.63417	4.60226	5.51789	5.69414	4.79763	5.14587	4.97106	4.32755	5.06558	4.68991	4.73517	4.68798
Q9JHU4	1	Dync1h1	6.42167e-07	12.3316	12.2634	12.1515	12.378	11.8001	12.4487	12.7429	12.8716	12.6931	12.5845	12.4725	12.1523	12.7394	12.6817	12.4931	12.4741	12.6234	12.2433	12.6167	12.4977
Q9JI46	1	Nudt3	2.39099e-05	9.11564	8.96895	9.08031	8.93953	8.76404	9.20702	9.49194	9.4299	9.30687	9.32177	9.20306	8.47795	9.12468	9.34687	9.2267	9.39223	9.32019	9.01476	9.4336	9.32363
Q9JI90	4	Rnf14	0.0129661	6.51928	7.26823	7.11011	6.61492	6.62386	6.87413	6.94164	7.05114	6.79813	7.03068	6.71226	6.69289	6.70653	6.71608	6.67791	6.37971	6.44752	6.32999	6.43412	6.32076
Q9JI91	5	Actn2	0.0416057	5.29784	5.70674	6.47112	5.97942	6.03121	7.14245	7.08092	7.36789	7.06818	7.24164	7.63208	7.33002	8.75049	7.70244	7.88136	8.02741	7.74685	7.87131	8.21309	8.24647
Q9JIF0	4	Prmt1	0.00144814	7.32064	6.7416	7.10421	6.88568	6.46709	6.77107	7.56101	7.23291	6.95603	6.71883	6.09996	5.1624	6.22661	6.23485	6.06878	5.93782	5.59581	5.06932	5.81627	5.61848
Q9JIF7	4	Copb1	9.91928e-07	7.60406	7.77461	7.54147	7.34395	7.19434	7.51112	7.44341	7.23501	7.43365	7.48091	7.01023	6.64679	6.99288	7.02589	6.85602	6.62781	6.44323	6.34355	6.61608	6.74874
Q9JIG4	5	Ppp1r3f	3.98271e-05	4.00146	4.06795	3.8403	3.71364	3.38611	5.0079	4.43234	4.30154	4.90019	5.00851	4.74029	5.50277	5.05684	5.02754	5.01328	4.46322	4.98752	4.88249	4.87083	4.6644
Q9JIG8	6	Praf2	1.07673e-06	6.52771	6.82401	6.7552	6.98333	6.6095	6.44513	6.27541	6.57549	6.65629	6.37779	6.81149	6.62739	6.8569	7.32631	6.69949	6.62971	7.01983	7.24573	7.29759	7.04165
Q9JII5	3	Dazap1	2.72685e-05	2.84343	2.8587	3.16731	3.6824	3.56094	1.48299	2.31471	2.11209	1.93895	2.40042	0.590547	2.04486	1.861	1.94189	1.92855	1.48405	2.7237	1.81284	1.82456	2.05761
Q9JII6	3	Akr1a1	0.00797461	7.61056	6.97712	7.74032	7.62229	7.41746	7.27084	7.36879	7.20382	7.10145	7.05776	6.82669	6.67001	7.03776	6.71171	7.25784	7.38425	6.90737	6.91024	7.20855	7.16194
Q9JIL5	4	Tulp4	0.000650352	6.59829	6.2905	6.23595	6.66367	6.60892	6.28397	6.3388	6.18159	6.5983	6.67907	5.73143	5.57109	5.8386	6.08261	5.53418	5.57075	5.73363	5.65391	5.4984	5.83002
Q9JIS5	5	Sv2a	0.0116056	5.58736	6.66172	6.91457	6.78433	6.73406	7.76939	7.9868	8.63728	8.27808	8.10673	8.70895	8.47571	8.72661	8.92055	8.80617	9.16976	9.17525	8.90684	9.37538	9.2212
Q9JJ28	4	Flii	7.57849e-06	6.61494	6.30801	6.05125	5.92777	5.41375	5.92586	6.22164	6.36719	6.43054	6.04593	5.87617	5.7402	5.66389	5.75802	5.73057	5.82575	6.12828	5.86842	5.64519	5.66326
Q9JJG0	4	Tacc2	5.07122e-08	8.4571	8.2869	8.18467	8.20668	8.37651	8.04332	8.10441	7.95634	8.33023	8.41218	7.16451	7.37938	7.19201	7.32909	7.01704	6.52422	6.83041	6.82093	6.48039	6.69707
Q9JJK2	5	Lancl2	0.0731803	5.22906	5.53978	5.14639	4.97081	5.03191	5.11571	5.38483	5.77257	5.48576	5.72603	5.67755	6.32704	5.65412	5.84434	5.86703	4.95471	5.60177	5.79808	6.15006	6.08508
Q9JJV2	2	Pfn2	1.19105e-09	8.52993	8.64969	8.72469	8.58117	8.61972	8.93464	8.9153	8.91271	9.08425	9.14694	9.03821	9.33401	9.01931	9.12134	9.08651	8.65256	8.71707	8.65226	8.67257	8.62916
Q9JK48	3	Sh3glb1	9.09104e-07	8.3714	8.43613	8.31973	8.38638	8.35774	8.34521	8.15872	8.10455	8.38127	8.46043	8.16794	8.30866	7.80895	8.08514	7.85376	7.61464	7.76902	7.74712	7.63852	7.66222
Q9JKB1	3	Uchl3	0.592349	6.97043	7.33626	6.8952	6.50494	6.83239	7.19563	6.83453	6.64993	6.96446	6.85342	6.74966	6.5216	6.26762	6.56294	6.26329	6.05334	6.30623	5.99319	6.17	6.17748
Q9JKC6	1	Cend1	5.88709e-06	6.31593	6.65927	7.37757	7.24353	4.41357	7.70359	8.0044	8.28026	8.37582	7.88093	8.788	8.79988	9.56544	9.73045	9.7162	9.57869	9.59345	9.71387	10.4246	10.0189
Q9JKC8	4	Ap3m1	0.000130205	4.0817	4.63189	4.49495	3.9632	3.93934	4.68792	4.98843	4.8626	4.57283	4.37427	3.99873	3.89783	4.12846	4.44238	4.25481	3.92395	3.71452	2.76731	3.56486	3.82734
Q9JKD3	5	Scamp5	6.20978e-06	5.31135	5.06892	5.73828	5.40506	4.79464	6.58725	6.6395	7.38113	6.90881	6.50328	7.28692	6.66885	7.20882	7.67431	7.3844	7.56672	7.59932	7.32599	7.9483	7.61082
Q9JKF6	5	Nectin1	0.000746329	5.27158	5.50862	5.1985	4.99271	5.46071	6.43856	6.31278	6.38831	6.34674	6.59188	6.63122	6.52446	5.83107	6.32524	6.27869	6.51885	6.76949	6.81738	6.50159	6.61274
Q9JKK7	8	Tmod2	1.4735e-07	8.36796	8.12923	8.17495	8.25301	8.11381	8.35424	8.77823	8.69414	8.59032	8.36546	8.32921	8.03961	8.21036	8.20194	8.42249	8.5026	7.90538	7.94315	8.32994	8.23505
Q9JKS5	5	Habp4	0.0207108	4.27298	3.6426	5.59038	5.04189	5.8441	5.57924	4.89375	5.67774	5.48742	5.75231	5.83558	7.19637	6.93574	6.3368	6.65419	6.06233	6.45663	6.85131	6.70183	6.91154
Q9JKY5	5	Hip1r	0.000632227	8.19294	8.28197	8.43422	8.51625	8.15869	8.89573	8.95089	9.28139	9.15656	9.04417	9.38239	9.36523	9.43977	9.39824	9.42618	9.02177	9.11578	8.83762	9.15025	9.18519
Q9JL04	5	Fmn2	0.668561	7.74958	8.01038	8.28367	8.1787	8.30182	8.91735	8.70377	9.02836	9.0894	9.33112	9.44018	9.97053	9.56499	9.59143	9.67114	9.494	9.94327	9.71501	9.65165	9.6996
Q9JLB0	7	Mpp6	3.87799e-08	7.13864	7.25213	6.85551	6.80213	6.73741	6.63694	6.64289	6.61175	6.63994	6.8206	6.55451	6.40184	7.11411	6.57728	6.74128	7.19879	6.68252	6.79468	7.12188	7.1533
Q9JLB9	8	Nectin3	2.99781e-08	4.48815	4.60386	5.12585	4.81716	4.50152	6.07012	5.93386	5.79392	6.24007	5.6633	5.62967	4.62601	4.96688	5.77908	5.23702	4.45863	4.20846	4.33138	4.45924	3.98848
Q9JLC8	5	Sacs	0.0577388	6.67159	6.35712	6.33529	6.49661	6.10691	6.66869	6.74165	6.85815	6.89747	6.71472	6.89713	6.5129	7.46803	7.14357	7.32499	7.54372	7.66459	7.33059	7.67113	7.54433
Q9JLJ2	7	Aldh9a1	5.02011e-06	6.62658	6.40965	6.81058	6.6607	6.75473	6.39797	6.24967	5.93801	5.99793	6.14342	6.12625	6.11252	6.12751	5.94847	6.53639	6.801	6.46999	6.20514	6.68894	6.70199
Q9JLM8	4	Dclk1	1.33728e-05	9.70054	9.85014	9.72624	9.6145	9.77054	9.84983	9.86884	9.81505	10.0256	10.116	9.44849	9.40267	9.19991	9.3876	9.24097	8.11585	8.24635	8.17249	8.15934	8.32027
Q9JLN9	5	Mtor	0.00175527	7.32745	7.6868	7.64277	7.50899	7.60944	8.00904	7.81054	8.0356	8.14209	8.09606	8.24018	8.33308	8.29133	8.273	8.29001	8.19325	8.57993	8.53488	8.41142	8.37228
Q9JLV5	1	Cul3	1.10503e-10	6.79422	6.60085	6.68868	6.51984	6.3161	6.93978	7.4274	7.65208	7.17294	7.1053	7.08134	6.36818	7.20623	7.30395	7.16234	7.41531	7.20387	6.72285	7.48529	7.39196
Q9JM13	1	Rabgef1	1.6672e-07	6.18565	6.05792	6.428	6.05398	5.90637	6.40202	6.36152	6.64752	6.29861	6.47778	6.47907	6.21541	6.33836	6.2311	6.42217	6.46554	6.53315	6.21824	6.47022	6.2959
Q9JM52	5	Mink1	0.00953264	5.9653	6.07864	6.6552	5.86759	6.51579	7.62822	7.41655	7.78057	7.85099	7.87011	8.40184	8.99425	8.99661	8.76907	8.84627	8.67292	8.9659	8.95	9.05405	9.03851
Q9JM96	3	Cdc42ep4	9.64397e-10	3.59149	4.16525	3.19728	2.90712	4.06502	2.66928	1.78148	1.84291	2.4773	2.75573	2.6841	2.78775	2.35348	1.86667	2.35963	0.85771	1.84681	1.25362	1.38561	1.26892
Q9JMA1	5	Usp14	0.194103	7.42205	7.68287	7.66633	7.51376	7.58735	7.98698	7.93723	7.93043	7.90459	8.05627	8.10791	7.7435	7.95253	7.95253	7.88837	8.22104	8.23707	8.16165	8.15422	8.25969
Q9JMC3	6	Dnaja4	1.25159e-05	3.85406	3.85868	4.33978	3.80204	4.17566	4.60526	4.43571	4.43595	4.65281	4.4657	5.27654	5.16032	5.4222	5.13627	5.91466	6.09599	6.05311	6.04695	6.50313	6.41372
Q9JME5	1	Ap3b2	5.32522e-07	9.30279	9.25417	9.51732	9.40048	9.06562	10.0371	10.1991	10.4532	10.2881	10.2124	10.2926	9.63078	10.2145	10.4245	10.2737	10.4476	10.3511	10.1741	10.4613	10.3793
Q9JMH9	5	Myo18a	5.93077e-09	9.28599	9.39892	9.60977	9.48256	9.46253	9.88317	9.97393	10.4205	10.2233	10.2558	10.2463	10.3425	10.2662	10.4322	10.3906	9.98748	10.1426	9.87829	10.0687	10.0912
Q9JMK2	3	Csnk1e	3.00959e-06	5.01323	5.49679	4.96012	5.48586	5.66364	4.80851	4.64917	4.30325	4.82834	4.93093	4.32823	4.58811	4.08897	4.01551	4.3072	3.9493	3.5998	3.66539	3.77694	3.95868
Q9QUG9	4	Rasgrp2	6.73389e-07	9.38419	9.95312	9.70072	9.13267	9.20865	10.0198	9.76628	9.33283	9.86926	9.92938	9.1531	8.81848	8.98196	8.78764	8.80207	7.76838	7.63466	7.9576	7.51912	7.63188
Q9QUI0	6	Rhoa	8.32491e-07	6.49648	6.28197	6.5474	6.66429	6.33787	6.66952	6.4838	6.52013	6.50782	6.6427	6.49201	6.55702	6.64335	6.78932	6.66957	6.57105	6.71873	6.87385	6.93403	6.70765
Q9QUM9	3	Psma6	1.98676e-08	6.69733	6.19471	6.46469	6.92211	6.45874	6.35909	5.83643	5.19238	5.58395	5.55236	5.39338	5.12342	5.22471	5.06904	5.41896	5.73595	4.84305	5.28435	5.11703	5.22542
Q9QUR6	4	Prep	0.0186309	9.74123	9.65667	9.61164	9.57272	9.54952	10.002	10.0599	9.95284	10.0641	10.0243	9.64487	9.27936	9.40336	9.5397	9.30205	8.68819	8.64487	8.60247	8.48842	8.52019
Q9QUR7	3	Pin1	3.00032e-05	6.10779	5.85112	6.16832	6.04326	5.69632	5.43467	5.31497	5.00277	5.71433	5.52674	5.46829	5.97831	5.84113	5.46567	5.67509	5.29901	5.32685	5.21305	5.35888	5.54622
Q9QUR8	2	Sema7a	2.54819e-10	3.3333	3.75506	4.14758	4.24692	3.61539	4.0977	4.27668	3.62097	3.92586	4.27409	4.50487	4.25062	3.97034	3.83344	4.37038	4.03604	3.62546	3.57602	3.32235	3.74458
Q9QVP9	1	Ptk2b	0.0010983	8.5963	8.70874	8.81695	8.42562	8.49903	9.03591	9.07174	8.94111	9.28303	9.35796	8.80329	8.99627	9.10886	8.90128	9.0777	9.3578	9.55011	9.20238	9.47429	9.42717
Q9QWI6	5	Srcin1	0.071555	10.5336	10.6507	10.8787	10.8822	10.8621	11.4714	11.4458	11.7984	11.7869	11.8853	12.0524	12.1039	12.0111	12.2594	12.0743	11.9101	12.1698	12.0073	12.0325	12.0666
Q9QWY8	5	Asap1	7.28116e-06	7.20084	6.83618	7.65955	7.4558	7.46437	8.53842	8.47816	8.83711	8.81268	8.88565	9.20482	9.609	9.17703	9.4275	9.62259	9.47154	9.70142	9.55041	9.81098	9.79862
Q9QX47	3	Son	5.59094e-09	8.09119	7.51672	8.12064	8.20261	8.05377	6.83722	7.28218	7.47269	6.989	6.90203	6.57664	6.77483	6.7286	6.99384	6.79222	6.79248	6.69341	6.52196	6.78492	6.86615
Q9QXB9	4	Drg2	2.31065e-09	6.1857	5.62312	5.95611	5.55963	5.43153	6.14332	6.16794	5.88866	6.25496	6.00668	6.00742	5.16735	5.88402	5.83164	5.8275	5.38171	5.52664	4.92223	5.31582	5.43705
Q9QXG2	1	Chm	7.2788e-07	4.6539	4.96462	5.06088	4.92272	4.62376	5.27846	5.58766	5.78938	5.55744	5.74476	5.33958	5.28285	5.33832	5.34408	5.61255	5.21651	5.64094	5.60302	5.80493	5.66441
Q9QXJ1	2	Apbb1	0.00381543	5.1461	5.36296	5.52761	5.19849	5.67396	5.95208	5.96553	5.94841	5.96556	6.02646	6.17929	6.14715	5.57183	5.93978	5.77869	5.5469	5.8935	5.7134	5.64201	5.69472
Q9QXL1	4	Kif21b	5.7686e-05	9.29946	9.46238	9.29082	9.0667	8.79326	9.80633	9.89108	9.76647	10.1875	10.1929	8.87398	8.12799	8.39091	8.94716	8.1429	5.7966	6.06324	6.34252	4.4044	6.14841
Q9QXL2	5	Kif21a	0.000550319	7.3985	7.56845	7.8261	7.70743	7.68462	8.06598	8.31761	8.88653	8.451	8.34878	8.53918	8.67287	8.92794	8.92686	8.99925	9.19648	9.4102	9.01978	9.52881	9.44002
Q9QXS1	5	Plec	1.14514e-08	9.59115	9.65284	10.585	10.7687	10.4381	11.2173	11.0251	11.3706	11.2514	11.4029	11.8324	12.2883	12.2595	11.8671	12.1581	12.7468	13.0671	12.8225	12.8394	12.8151
Q9QXS6	4	Dbn1	1.14968e-07	11.5149	11.4327	11.1574	11.122	11.0505	10.9876	10.9848	10.7876	11.0746	11.1073	10.6172	10.5604	10.5148	10.5665	10.4128	9.84863	9.89158	9.79617	9.73886	9.77579
Q9QXY6	5	Ehd3	2.31063e-08	4.49445	5.07725	5.26552	4.95992	5.08459	5.91996	5.77667	5.73641	5.95549	6.17133	6.37336	6.14911	6.34072	6.19008	6.05955	6.61928	6.96735	6.74597	7.02272	7.04331
Q9QXZ0	3	Macf1	1.42751e-09	11.9247	11.8372	11.6554	11.9492	11.67	11.4338	11.4912	11.5015	11.5529	11.5985	11.2201	11.1257	11.1882	11.2676	11.1264	10.9824	11.2414	10.9261	11.0976	11.0715
Q9QY01	8	Ulk2	1.3557e-08	6.51469	6.35635	6.29125	6.00904	5.80015	6.69627	7.03821	6.99081	7.17183	7.14544	6.45826	6.04679	6.33239	6.74976	6.37005	5.63857	6.1381	5.68733	5.80451	5.75927
Q9QY76	6	Vapb	7.81503e-08	8.97004	9.31644	9.46331	9.4267	9.34727	9.31112	9.09844	9.16353	9.29609	9.44935	9.54761	9.68463	9.59343	9.65138	9.7599	9.49923	9.77587	9.89042	9.93904	9.92172
Q9QY81	3	Nup210	1.14396e-05	5.28571	5.64671	5.74672	5.70987	5.70496	5.493	5.39247	5.01703	5.20156	5.38406	5.32888	4.79363	5.81815	5.37035	5.04086	4.69817	4.43765	4.52799	4.87751	5.11825
Q9QYB5	5	Add3	0.000150043	6.18965	6.84514	7.0515	6.40287	6.45961	7.10857	7.33824	7.37553	7.39406	7.45169	7.43039	7.10406	7.23882	7.39375	7.20764	7.0369	7.16034	6.98775	7.30763	7.47716
Q9QYB8	6	Add2	0.00132607	9.93255	9.74752	9.69241	9.65425	9.61839	9.46062	9.6295	9.6364	9.67862	9.70189	9.53667	9.73322	9.98038	9.72367	9.95921	10.2185	10.2172	9.90187	10.3261	10.301
Q9QYC0	8	Add1	0.000383983	10.3911	10.2691	10.2786	10.1169	10.0299	10.4775	10.5714	10.5369	10.7017	10.6031	10.4157	10.3404	10.412	10.4318	10.466	10.3765	10.4345	10.1037	10.4028	10.3796
Q9QYC1	2	Pcnx1	0.000149169	3.77945	3.58399	4.00932	3.86473	4.65466	4.7105	4.50985	4.52794	4.92335	4.97412	4.72649	4.73085	4.17451	4.5432	4.10316	3.61914	3.80511	4.15494	3.93941	3.65195
Q9QYF9	4	Ndrg3	0.00106555	3.61086	3.58055	4.34095	3.82136	4.1495	5.00335	4.82431	4.5618	4.85146	5.20833	4.75856	4.24736	3.98154	4.04567	4.00681	3.50499	3.28188	3.4498	3.30931	3.29419
Q9QYI3	3	Dnajc7	0.000958228	6.73185	6.83587	6.58062	6.25044	6.12844	6.01732	6.07097	5.86136	6.13234	6.04799	5.75295	5.83493	6.03833	5.61821	5.90892	5.3213	5.73501	5.50474	5.66961	5.56912
Q9QYR6	5	Map1a	0.288923	11.1664	10.8556	11.4191	11.1932	10.8921	11.727	11.8847	12.3755	12.1409	12.0521	12.1024	12.7483	13.2087	12.6197	12.9384	12.7201	13.1734	12.6257	13.1315	13.0167
Q9QYS2	1	Grm3	0.0879445	8.33869	8.35165	8.47698	8.16973	7.86389	8.92653	9.37596	9.37615	9.2444	9.14242	8.96297	7.99854	8.71064	9.14466	8.91831	9.15684	9.13976	8.69457	9.18081	9.11076
Q9QYX7	5	Pclo	5.04853e-07	10.7553	11.0717	11.3047	11.3862	11.3531	12.1695	12.1598	12.6116	12.4946	12.6034	13.0901	13.1584	13.0045	13.4071	13.2361	13.1526	13.5676	13.2434	13.5541	13.4434
Q9QYY8	4	Spast	0.000540513	5.32264	5.64214	5.3161	5.8588	5.51728	5.28115	5.33693	5.15134	5.27255	5.37828	4.56946	4.30223	4.39663	4.37828	4.42065	4.22849	4.547	4.53548	4.1993	4.31583
Q9QZ06	5	Tollip	2.00177e-09	5.31475	5.86579	6.31874	6.31278	5.98578	6.96469	7.01827	7.24043	7.09527	7.14985	7.58135	6.83991	7.26811	7.36936	7.32319	7.34794	7.6132	7.31207	7.42372	7.52547
Q9QZ88	8	Vps29	1.28369e-06	7.9708	7.60594	7.99894	8.05481	7.91037	8.46973	8.71314	8.84688	8.75998	8.95416	8.71631	8.09153	8.38398	8.89409	8.45527	8.27178	8.46852	8.38697	8.23239	8.27619
Q9QZB9	4	Dctn5	0.000123402	5.74833	4.28768	4.9361	5.12725	4.70044	4.56786	5.32699	5.12211	4.60041	4.44664	3.70343	3.53472	4.48535	4.48969	4.636	4.25144	4.23056	4.28384	4.70698	4.5265
Q9QZE5	3	Copg1	0.471373	3.87401	4.51658	4.14596	4.19336	4.98395	3.51739	3.50523	3.04766	3.43077	3.47294	3.21193	2.94197	2.74348	2.78678	2.96407	2.61317	2.44955	2.66994	1.99576	2.69084
Q9QZK2	5	Bcar3	0.0437743	1.93335	3.18749	3.89225	3.22283	2.79509	3.80343	3.89869	4.04047	3.84904	4.15709	4.1866	3.80393	3.57776	4.16705	4.08032	3.72152	3.94936	3.59831	3.718	3.82014
Q9QZM0	4	Ubqln2	6.42167e-07	7.1593	6.85815	7.25501	6.93016	7.078	7.14582	7.25049	7.08252	7.05614	7.46594	6.92402	6.95681	7.06472	6.99428	6.68111	6.8877	6.96008	6.60354	6.63048	6.79371
Q9QZQ1	3	Afdn	0.00552598	10.3527	10.3973	9.93689	10.17	10.1317	10.1787	10.0359	9.99032	10.3235	10.1983	9.93051	9.92338	9.6935	9.92792	9.59651	9.12329	9.5619	9.37032	9.334	9.3338
Q9QZQ8	3	Macroh2a1	0.00531199	8.81515	8.89715	8.40281	9.06458	8.98739	7.02183	6.89219	6.94682	7.42691	7.42229	7.09176	8.04961	7.41001	7.34724	7.47756	7.35261	7.80314	7.85899	7.64632	7.66535
Q9QZR0	4	Rnf25	2.22846e-06	5.01877	5.21268	4.75148	4.54695	4.40796	4.73662	4.7931	4.29874	4.6856	4.58374	4.34234	3.1462	4.33073	4.59991	4.22532	3.53909	4.56134	4.19875	4.23312	4.41452
Q9QZS3	5	Numb	7.79894e-07	5.91993	4.89058	6.42364	6.18594	5.67353	6.46793	6.73969	7.19295	7.67191	7.29566	7.24808	7.70948	7.54414	7.70058	7.71001	8.00369	8.26929	7.94902	7.81386	7.66081
Q9QZS8	4	Sh2d3c	0.0520339	3.97615	3.7772	4.5537	4.34046	4.45796	4.1482	4.11378	3.61143	4.55454	4.59016	3.99273	3.41462	3.69129	4.03455	3.9781	3.75193	2.9931	3.20122	3.45746	3.73758
Q9QZX7	5	Srr	5.6694e-06	5.73559	5.93384	6.70056	6.10164	6.17127	7.42583	7.09598	7.2702	7.42111	7.75894	8.01432	8.2245	8.10463	8.00524	8.21581	8.1846	8.26147	8.3877	8.4559	8.56095
Q9R0D8	1	Wdr54	0.00657025	4.31231	4.37305	4.45322	4.61954	2.93411	4.89117	5.08354	5.11665	4.68813	4.72496	4.85613	4.08221	4.91183	5.0278	5.1354	5.03846	4.79313	4.26167	5.07926	5.31565
Q9R0H0	4	Acox1	5.49134e-09	7.77376	7.39658	7.74109	7.58865	7.23117	7.34199	7.43389	7.25008	7.13302	7.25496	7.16013	6.41945	6.76341	6.75121	7.15431	6.38496	6.15893	6.1407	6.35058	6.44091
Q9R0K7	5	Atp2b2	0.0583315	8.26055	8.36632	9.06887	8.86621	8.40388	9.81707	9.91878	10.1916	10.0412	10.0697	10.303	10.2371	10.516	10.5964	10.7329	10.6688	10.5983	10.5106	11.015	10.8542
Q9R0M6	3	Rab9a	1.41879e-06	4.51515	4.12378	4.37196	4.3486	3.90252	3.79852	4.16295	3.71684	4.10607	4.228	3.76142	3.52771	3.77838	3.15713	3.94934	3.82054	3.28482	3.58674	3.52089	3.93939
Q9R0N7	5	Syt7	9.94217e-09	5.96082	5.87335	5.94757	6.04735	6.13739	6.4254	6.42437	6.75594	6.4856	6.52948	7.0178	7.2045	6.90591	7.31875	7.33594	7.42925	7.37729	7.13055	7.49327	7.3412
Q9R0P3	6	Esd	0.00475681	7.84098	8.00678	8.10746	8.06107	8.29756	7.78627	7.44467	7.03785	7.35794	7.52626	7.64479	7.86139	7.78688	7.33548	7.95952	8.3705	7.95385	8.28293	8.30057	8.33947
Q9R0P5	4	Dstn	5.26659e-09	8.92703	9.0281	9.13621	8.94264	9.09205	8.88356	8.84249	8.98665	9.11116	9.29275	8.92407	9.0421	8.8806	8.92487	8.89436	8.53062	8.55516	8.63281	8.5183	8.47065
Q9R0P9	3	Uchl1	0.000163794	9.70467	9.74952	9.69852	9.5528	9.88291	9.39283	9.30462	9.04446	9.35034	9.42355	9.10715	9.25042	9.11641	9.04237	8.93789	9.18284	9.03118	8.91967	9.01646	9.01715
Q9R0Q6	1	Arpc1a	1.64506e-05	7.32547	7.03568	7.34024	7.24057	6.82802	7.46042	7.82162	7.7686	7.52642	7.45281	7.40402	6.72385	7.48869	7.62201	7.47461	7.62065	7.33335	7.38931	7.8764	7.78637
Q9R0Q7	3	Ptges3	1.45301e-06	7.76778	7.38756	7.60668	7.61805	7.78198	6.91816	7.16858	6.90934	6.9022	6.97798	6.73611	6.60511	6.9322	6.79793	6.97557	7.14713	6.88984	6.57747	6.71393	6.68698
Q9R0Y5	5	Ak1	0.0403833	6.27554	6.12121	6.7213	7.18977	7.25382	6.66553	6.55489	6.70349	6.53337	6.68976	6.86178	7.31692	7.18753	6.92951	7.08445	7.35125	7.20361	7.17203	7.24128	7.07328
Q9R111	5	Gda	3.4888e-06	6.85344	6.82805	7.69716	7.17129	7.12061	8.74463	8.86267	9.76194	9.00162	9.08991	9.64564	9.76283	10.0037	10.0472	10.2884	10.1602	10.0079	9.71521	10.2948	10.283
Q9R190	3	Mta2	0.0158302	7.78343	7.98173	7.65759	8.23259	7.96362	6.32889	6.19027	5.84288	6.3276	6.31476	6.05753	6.22979	5.91301	5.95942	5.81689	5.54057	5.90294	6.18169	5.90986	5.96023
Q9R1C7	3	Prpf40a	5.2641e-09	4.85831	5.02856	5.01159	5.38579	5.39108	4.05043	3.63024	3.29003	3.59463	3.59181	3.67294	3.35767	3.71154	3.41553	3.65459	3.40523	3.03295	2.17534	3.17883	3.59925
Q9R1L5	4	Mast1	2.31676e-09	8.67405	8.9366	8.53368	8.64538	8.61342	8.96396	8.82804	8.56218	9.06725	9.19029	8.23256	8.14563	7.91056	8.17403	7.83341	7.46231	7.85681	7.47532	7.5452	7.79596
Q9R1P0	3	Psma4	1.04279e-06	6.49345	6.22686	6.47042	6.69887	6.51798	5.82269	6.05741	5.91084	5.85361	5.7854	5.54815	5.36549	5.47136	5.35031	5.57495	5.5974	4.62536	4.9002	5.25867	5.39052
Q9R1P1	3	Psmb3	1.75348e-07	5.56346	5.28265	5.00274	5.33483	4.93777	4.58463	4.62298	3.99526	4.41057	4.26771	4.43505	3.40139	4.03859	4.01413	4.28215	4.28195	3.80058	3.75794	4.19805	4.27734
Q9R1P4	3	Psma1	1.44034e-06	8.63915	8.11388	8.22469	8.59166	8.19168	7.49778	7.67323	7.32224	7.42817	7.20428	6.95591	6.48992	6.94282	6.70496	7.2247	6.89742	6.50608	6.72093	6.99651	6.75511
Q9R1Q8	6	Tagln3	5.3635e-05	7.32571	7.4348	7.34941	7.54435	7.67832	7.50433	7.38437	7.33521	7.80311	7.63091	7.86883	8.33062	7.92143	8.03798	8.37946	8.49341	8.44772	8.45934	8.74483	8.5902
Q9R1R2	2	Trim3	1.06521e-07	5.78986	5.98469	6.47291	6.37743	6.06755	6.60982	6.4081	6.60545	6.3855	6.91632	6.87772	6.79103	6.63552	6.83967	6.80151	6.00324	6.2728	6.41617	6.00671	6.13658
Q9R1T2	3	Sae1	3.97694e-07	7.62364	7.36394	7.74497	7.95338	7.71764	6.64395	6.6533	6.12318	6.24247	6.4122	5.88618	5.87906	6.17237	5.81533	6.56087	6.37301	4.87329	5.84364	6.21134	6.41126
Q9R1T4	5	Septin6	0.000316734	5.23039	5.54111	7.04542	7.00345	6.86271	6.95651	7.21389	7.77189	7.44654	7.5669	8.19512	8.15079	7.7859	7.85397	8.00398	9.13586	9.04712	8.89301	8.7099	8.63929
[truncated: 275 more rows]

## Sheet: meta_analysis
Protein	Gene Symbol	cluster	Protein names	padjust	Terms	Ontology_group	norm_neonate	norm_earlypostnatal	norm_preweanling	norm_adult	Gonzalez adult P70-P9 log2FC	Chauhan GCMs P9-P3 log2FC	Chauhan GCPs P9-P3 log2FC	Peixoto STR P18-P8 log2FC	trend_adult this study	trend_adult_Gonzalez	adult Gonzalez vs this study	trend_preweanling this study	trend_preweanling_Peixoto	preweanling Peixoto vs this study	trend_earlypostnatal this study	trend_earlypost_GCMs	trend_earlypost_GCP	earlyp_GCM vs this study	earlyp_GCP vs this study
A2A5R2	Arfgef2	1	Brefeldin A-inhibited guanine nucleotide-exchange protein 2, Brefeldin A-inhibited GEP 2 (ADP-ribosylation factor guanine nucleotide-exchange factor 2)	0.00142497	presynapse	presynapse	0	0.812331	0.988229	1.22434	0.172399	NA	NA	-0.0741809	+	+	TRUE	+	-	FALSE	+	NA	NA	NA	NA
A2CG49	Kalrn	4	Kalirin, EC 2.7.11.1 (Protein Duo) (Serine/threonine-protein kinase with Dbl- and pleckstrin homology domain)	7.01066e-08	presynapse	presynapse	0	0.49685	0.112008	-0.696703	0.152083	NA	NA	-0.342287	-	+	FALSE	+	-	FALSE	+	NA	NA	NA	NA
B0V2N1	Ptprs	8	Receptor-type tyrosine-protein phosphatase S, R-PTP-S, EC 3.1.3.48 (PTPNU-3) (Receptor-type tyrosine-protein phosphatase sigma, R-PTP-sigma)	5.78162e-05	integral component of presynaptic membrane	presynaptic membrane	0	0.477765	0.228715	0.13937	0.0822998	0.977512	-3.61463	0.571136	+	+	TRUE	+	+	TRUE	+	+	-	TRUE	FALSE
B1AWN6	Scn2a	5	Sodium channel protein type 2 subunit alpha (Voltage-gated sodium channel subunit alpha Nav1.2)	1.44542e-08	integral component of presynaptic membrane	presynaptic membrane	0	1.33727	1.6636	1.90782	NA	NA	NA	0.236964	+	NA	NA	+	+	TRUE	+	NA	NA	NA	NA
B2RUJ5	Apba1	4	Amyloid-beta A4 precursor protein-binding family A member 1 (Adapter protein X11alpha) (Neuron-specific X11 protein) (Neuronal Munc18-1-interacting protein 1, Mint-1)	6.48952e-08	presynaptic active zone membrane	presynaptic active zone	0	1.15518	0.0658999	-0.734943	-0.538356	-0.619693	-6.63051	-1.17427	-	-	TRUE	+	-	FALSE	+	-	-	FALSE	FALSE
E9PUL5	Prrt2	5	Proline-rich transmembrane protein 2 (Dispanin subfamily B member 3, DSPB3)	8.25757e-07	integral component of presynaptic membrane	presynaptic membrane	0	0.621999	0.989068	1.80336	0.375354	0.346205	4.15205	0.458244	+	+	TRUE	+	+	TRUE	+	+	+	TRUE	TRUE
G5E829	Atp2b1	5	Plasma membrane calcium-transporting ATPase 1, EC 7.2.2.10 (Plasma membrane calcium ATPase isoform 1, PMCA1) (Plasma membrane calcium pump isoform 1)	2.99781e-08	integral component of presynaptic active zone membrane	presynaptic active zone	0	0.996683	1.60908	1.76217	NA	5.05768	3.55975	1.95639	+	NA	NA	+	+	TRUE	+	+	+	TRUE	TRUE
O08539	Bin1	5	Myc box-dependent-interacting protein 1 (Amphiphysin II) (Amphiphysin-like protein) (Bridging integrator 1) (SH3 domain-containing protein 9)	5.91954e-09	extrinsic component of synaptic vesicle membrane	NA	0	1.18091	1.45058	1.31343	0.408483	4.76741	1.89574	1.41033	+	+	TRUE	+	+	TRUE	+	+	+	TRUE	TRUE
O08547	Sec22b	NA	Vesicle-trafficking protein SEC22b (ER-Golgi SNARE of 24 kDa, ERS-24, ERS24) (SEC22 vesicle-trafficking protein homolog B) (SEC22 vesicle-trafficking protein-like 1, mSec22b)	0.303522	synaptic vesicle	NA	0	0.112603	0.0101624	0.338438	-0.16415	0.419685	1.4064	-0.0544674	+	-	FALSE	+	-	FALSE	+	+	+	TRUE	TRUE
O08553	Dpysl2	4	Dihydropyrimidinase-related protein 2, DRP-2 (Unc-33-like phosphoprotein 2, ULIP-2)	7.58598e-05	presynapse	presynapse	0	-0.0140777	-0.388252	-0.144758	0.217819	-0.53078	0.408624	-0.281931	-	+	FALSE	-	-	TRUE	-	-	+	TRUE	FALSE
O08585	Clta	5	Clathrin light chain A, Lca	5.96106e-09	presynaptic endocytic zone membrane	presynaptic endocytic zone	0	1.41167	1.90292	2.59177	0.56241	1.93786	1.24359	NA	+	+	TRUE	+	NA	NA	+	+	+	TRUE	TRUE
O08599	Stxbp1	5	Syntaxin-binding protein 1 (Protein unc-18 homolog 1, Unc18-1) (Protein unc-18 homolog A, Unc-18A)	6.81613e-09	extrinsic component of presynaptic membrane	presynaptic membrane	0	1.20535	1.62847	2.2833	0.514078	1.35088	0.67355	0.984028	+	+	TRUE	+	+	TRUE	+	+	+	TRUE	TRUE
O08917	Flot1	1	Flotillin-1	3.80772e-05	presynaptic active zone	presynaptic active zone	0	0.762756	0.797301	1.25202	0.160539	NA	NA	0.0984211	+	+	TRUE	+	+	TRUE	+	NA	NA	NA	NA
O35129	Phb2	6	Prohibitin-2 (B-cell receptor-associated protein BAP37) (Repressor of estrogen receptor activity)	0.0013467	presynaptic active zone	presynaptic active zone	0	-0.455431	-0.189258	0.374903	-0.376054	1.45521	-0.490764	0.155617	+	-	FALSE	-	+	FALSE	-	+	-	FALSE	TRUE
O35382	Exoc4	8	Exocyst complex component 4 (Exocyst complex component Sec8)	0.0442232	synaptic vesicle	NA	0	0.750688	-0.0178464	0.183898	-0.266365	-0.785868	-6.63051	-0.881854	+	-	FALSE	-	-	TRUE	+	-	-	FALSE	FALSE
O35526	Stx1a	5	Syntaxin-1A (Neuron-specific antigen HPC-1)	1.43535e-07	integral component of synaptic vesicle membrane	NA	0	1.20127	1.72184	2.3463	0.483482	2.62261	2.383	1.45347	+	+	TRUE	+	+	TRUE	+	+	+	TRUE	TRUE
O35551	Rabep1	4	Rab GTPase-binding effector protein 1 (Rabaptin-5) (Rabaptin-5alpha)	0.0122565	presynaptic cytosol	cytosol, cytoskeleton, endosome	0	0.0655092	0.0565911	-0.1374	0.546599	NA	NA	NA	-	+	FALSE	+	NA	NA	+	NA	NA	NA	NA
O35633	Slc32a1	1	Vesicular inhibitory amino acid transporter (GABA and glycine transporter) (Solute carrier family 32 member 1) (Vesicular GABA transporter, mVGAT, mVIAAT)	0.000394894	integral component of synaptic vesicle membrane	NA	0	0.952409	1.52101	1.73352	0.424537	-0.193407	1.32844	-0.34033	+	+	TRUE	+	-	FALSE	+	-	+	FALSE	TRUE
O35963	Rab33b	NA	Ras-related protein Rab-33B	0.449187	presynapse	presynapse	0	0.19475	0.159245	0.0429516	-0.013461	NA	NA	-1.19707	+	-	FALSE	+	-	FALSE	+	NA	NA	NA	NA
O54774	Ap3d1	5	AP-3 complex subunit delta-1 (AP-3 complex subunit delta) (Adaptor-related protein complex 3 subunit delta-1) (Delta-adaptin, mBLVR1)	6.28288e-06	presynaptic endosome	cytosol, cytoskeleton, endosome	0	0.496638	1.21497	1.49706	0.042052	-4.17944	2.50457	-0.0783086	+	+	TRUE	+	-	FALSE	+	-	+	FALSE	TRUE
O54828	Rgs9	5	Regulator of G-protein signaling 9, RGS9	1.91998e-07	presynaptic membrane	presynaptic membrane	0	2.92611	3.5861	4.06871	0.238133	NA	NA	0.626681	+	+	TRUE	+	+	TRUE	+	NA	NA	NA	NA
O54829	Rgs7	5	Regulator of G-protein signaling 7, RGS7	1.13553e-07	presynapse	presynapse	0	0.973832	1.50369	1.97788	0.354433	-5.71928	-0.059217	0.507509	+	+	TRUE	+	+	TRUE	+	-	-	FALSE	FALSE
O54865	Gucy1b1	4	Guanylate cyclase soluble subunit beta-1, GCS-beta-1, EC 4.6.1.2 (Guanylate cyclase soluble subunit beta-3, GCS-beta-3) (Soluble guanylate cyclase small subunit)	1.62638e-08	presynaptic active zone cytoplasmic component	presynaptic active zone	0	-0.442761	-1.49145	-1.64904	-0.28397	NA	NA	-0.742955	-	-	TRUE	-	-	TRUE	-	NA	NA	NA	NA
O54991	Cntnap1	5	Contactin-associated protein 1, Caspr, Caspr1 (MHDNIV) (NCP1) (Neurexin IV) (Neurexin-4) (Paranodin)	6.30817e-07	presynaptic active zone	presynaptic active zone	0	1.64491	3.58358	3.49198	0.30157	2.18482	3.63796	0.895796	+	+	TRUE	+	+	TRUE	+	+	+	TRUE	TRUE
O55017	Cacna1b	5	Voltage-dependent N-type calcium channel subunit alpha-1B (Brain calcium channel III, BIII) (Calcium channel, L type, alpha-1 polypeptide isoform 5) (Voltage-gated calcium channel subunit alpha Cav2.2)	3.15511e-06	integral component of presynaptic membrane	presynaptic membrane	0	0.626981	0.865126	0.969726	0.141307	NA	NA	NA	+	+	TRUE	+	NA	NA	+	NA	NA	NA	NA
O55042	Snca	5	Alpha-synuclein (Non-A beta component of AD amyloid) (Non-A4 component of amyloid precursor, NACP)	3.58568e-08	synaptic vesicle membrane	NA	0	1.56493	2.37984	2.98162	1.0255	4.63892	4.15839	0.806526	+	+	TRUE	+	+	TRUE	+	+	+	TRUE	TRUE
O55131	Septin7	5	Septin-7 (CDC10 protein homolog)	8.50287e-10	presynaptic membrane	presynaptic membrane	0	1.08682	1.89691	2.49706	0.404755	NA	NA	0.905341	+	+	TRUE	+	+	TRUE	+	NA	NA	NA	NA
O55142	Rpl35a	3	60S ribosomal protein L35a	0.00581727	presynaptic ribosome	presynaptic ribosome and ER	0	-0.69141	-1.37011	-1.19056	-0.915707	-3.54176	1.02802	-1.84017	-	-	TRUE	-	-	TRUE	-	-	+	TRUE	FALSE
O70161	Pip5k1c	5	Phosphatidylinositol 4-phosphate 5-kinase type-1 gamma, PIP5K1-gamma, PtdIns(4)P-5-kinase 1 gamma, EC 2.7.1.68 (Phosphatidylinositol 4-phosphate 5-kinase type I gamma, PIP5KIgamma)	2.38464e-10	presynaptic endocytic zone membrane	presynaptic endocytic zone	0	1.26103	2.10689	2.85266	0.527152	-1.18443	0.965107	NA	+	+	TRUE	+	NA	NA	+	-	+	FALSE	TRUE
O70439	Stx7	4	Syntaxin-7	7.08085e-05	integral component of synaptic vesicle membrane	NA	0	0.0215405	-0.396557	-0.446456	-0.228529	-1.28842	-1.25228	-1.64171	-	-	TRUE	-	-	TRUE	+	-	-	FALSE	FALSE
O70589	Cask	8	Peripheral plasma membrane protein CASK, EC 2.7.11.1 (Calcium/calmodulin-dependent serine protein kinase)	0.00124552	presynapse	presynapse	0	0.469284	0.230626	0.131849	0.029177	-4.16091	-0.155336	NA	+	+	TRUE	+	NA	NA	+	-	-	FALSE	FALSE
O88704	Hcn1	5	Potassium/sodium hyperpolarization-activated cyclic nucleotide-gated channel 1 (Brain cyclic nucleotide-gated channel 1, BCNG-1) (Hyperpolarization-activated cation channel 2, HAC-2)	4.77043e-08	integral component of presynaptic active zone membrane	presynaptic active zone	0	1.3991	2.22929	2.34239	0.416689	NA	NA	-0.153043	+	+	TRUE	+	-	FALSE	+	NA	NA	NA	NA
O88712	Ctbp1	5	C-terminal-binding protein 1, CtBP1, EC 1.1.1.-	9.43279e-07	extrinsic component of presynaptic endocytic zone membrane	presynaptic endocytic zone	0	1.05229	1.24149	2.07928	0.331209	NA	NA	0.705041	+	+	TRUE	+	+	TRUE	+	NA	NA	NA	NA
O88737	Bsn	5	Protein bassoon	2.12814e-08	presynaptic active zone cytoplasmic component	presynaptic active zone	0	2.43019	3.8957	4.39289	0.510951	NA	NA	0.692446	+	+	TRUE	+	+	TRUE	+	NA	NA	NA	NA
O88935	Syn1	5	Synapsin-1 (Synapsin I)	8.29564e-10	extrinsic component of synaptic vesicle membrane	NA	0	1.37735	2.27163	3.22045	0.764031	2.05431	0.828811	1.1827	+	+	TRUE	+	+	TRUE	+	+	+	TRUE	TRUE
O89116	Vti1a	NA	Vesicle transport through interaction with t-SNAREs homolog 1A (Vesicle transport v-SNARE protein Vti1-like 2) (Vti1-rp2)	0.229409	synaptic vesicle	NA	0	0.107003	-0.1384	0.225959	-0.0273654	NA	NA	1.71371	+	-	FALSE	-	+	FALSE	+	NA	NA	NA	NA
P05132	Prkaca	NA	cAMP-dependent protein kinase catalytic subunit alpha, PKA C-alpha, EC 2.7.11.11	0.267295	presynapse	presynapse	0	0.152308	-0.0604928	0.134693	0.0376858	3.99768	4.50016	-0.559695	+	+	TRUE	-	-	TRUE	+	+	+	TRUE	TRUE
P06837	Gap43	4	Neuromodulin (Axonal membrane protein GAP-43) (Calmodulin-binding protein P-57) (Growth-associated protein 43)	8.15097e-07	presynapse	presynapse	0	0.178763	0.0741191	-0.903599	-1.60829	-1.99317	0.823354	-0.420399	-	-	TRUE	+	-	FALSE	+	-	+	FALSE	TRUE
P08551	Nefl	5	Neurofilament light polypeptide, NF-L (68 kDa neurofilament protein) (Neurofilament triplet L protein)	2.89301e-07	presynaptic intermediate filament cytoskeleton	cytosol, cytoskeleton, endosome	0	2.56333	3.78309	3.87994	0.400256	5.73219	4.72725	0.634072	+	+	TRUE	+	+	TRUE	+	+	+	TRUE	TRUE
P08553	Nefm	5	Neurofilament medium polypeptide, NF-M (160 kDa neurofilament protein) (Neurofilament 3) (Neurofilament triplet M protein)	6.64897e-08	presynaptic intermediate filament cytoskeleton	cytosol, cytoskeleton, endosome	0	2.40151	3.54223	3.47922	0.367947	5.48797	3.4174	-0.154372	+	+	TRUE	+	-	FALSE	+	+	+	TRUE	TRUE
P08752	Gnai2	4	Guanine nucleotide-binding protein G(i) subunit alpha-2 (Adenylate cyclase-inhibiting G alpha protein)	1.9372e-07	neuronal dense core vesicle	neuronal dense core vesicle	0	-0.0819291	-0.42056	-0.565459	-0.176302	1.04902	-1.41444	0.130389	-	-	TRUE	-	+	FALSE	-	+	-	FALSE	TRUE
P11798	Camk2a	5	Calcium/calmodulin-dependent protein kinase type II subunit alpha, CaM kinase II subunit alpha, CaMK-II subunit alpha, EC 2.7.11.17	2.35327e-08	presynaptic cytosol	cytosol, cytoskeleton, endosome	0	4.02149	5.34608	5.81354	1.11126	5.98255	6.22611	NA	+	+	TRUE	+	NA	NA	+	+	+	TRUE	TRUE
P11881	Itpr1	5	Inositol 1,4,5-trisphosphate receptor type 1 (IP3 receptor isoform 1, IP3R 1, InsP3R1) (Inositol 1,4,5-trisphosphate-binding protein P400) (Protein PCD-6) (Purkinje cell protein 1) (Type 1 inositol 1,4,5-trisphosphate receptor, Type 1 InsP3 receptor)	2.45808e-09	integral component of presynaptic SER membrane	presynaptic ribosome and ER	0	1.41089	2.54274	3.02941	0.375722	NA	NA	0.902357	+	+	TRUE	+	+	TRUE	+	NA	NA	NA	NA
P12658	Calb1	1	Calbindin (Calbindin D28) (D-28K) (PCD-29) (Spot 35 protein) (Vitamin D-dependent calcium-binding protein, avian-type)	0.147586	presynaptic cytosol	cytosol, cytoskeleton, endosome	0	0.345089	0.482094	0.863509	0.356413	-1.54425	4.41492	-0.56451	+	+	TRUE	+	-	FALSE	+	-	+	FALSE	TRUE
P12960	Cntn1	1	Contactin-1 (Neural cell surface protein F3)	0.0038317	anchored component of presynaptic membrane	presynaptic membrane	0	0.258673	0.380053	0.582175	-0.292893	0.79323	0.394356	-0.47742	+	-	FALSE	+	-	FALSE	+	+	+	TRUE	TRUE
P12970	Rpl7a	3	60S ribosomal protein L7a (Surfeit locus protein 3)	0.000337159	presynaptic ribosome	presynaptic ribosome and ER	0	-1.36221	-1.17656	-0.969247	-0.923167	-1.5372	0.253714	NA	-	-	TRUE	-	NA	NA	-	-	+	TRUE	FALSE
P13595	Ncam1	8	Neural cell adhesion molecule 1, N-CAM-1, NCAM-1 (CD antigen CD56)	0.000628306	integral component of presynaptic membrane	presynaptic membrane	0	0.0203507	-0.234205	-0.595159	-1.23314	-1.69726	-1.37795	-0.858726	-	-	TRUE	-	-	TRUE	+	-	-	FALSE	FALSE
P14115	Rpl27a	3	60S ribosomal protein L27a (L29)	4.61717e-06	presynaptic ribosome	presynaptic ribosome and ER	0	-1.87036	-2.05661	-1.91788	-0.4299	-2.09017	0.294713	-0.841297	-	-	TRUE	-	-	TRUE	-	-	+	TRUE	FALSE
P14131	Rps16	3	40S ribosomal protein S16	6.68054e-07	presynaptic ribosome	presynaptic ribosome and ER	0	-1.29632	-1.36337	-1.76226	-0.79391	-3.10665	-2.27911	-1.25709	-	-	TRUE	-	-	TRUE	-	-	-	TRUE	TRUE
P14148	Rpl7	3	60S ribosomal protein L7	5.41296e-05	presynaptic ribosome	presynaptic ribosome and ER	0	-1.03964	-0.995622	-0.85724	-0.976144	-2.53951	-2.20128	-1.13629	-	-	TRUE	-	-	TRUE	-	-	-	TRUE	TRUE
P14869	Rplp0	3	60S acidic ribosomal protein P0 (60S ribosomal protein L10E)	0.000422085	presynaptic ribosome	presynaptic ribosome and ER	0	-0.827739	-0.848075	-1.32848	-0.634669	-1.53876	-1.87392	NA	-	-	TRUE	-	NA	NA	-	-	-	TRUE	TRUE
P15116	Cdh2	6	Cadherin-2 (Neural cadherin, N-cadherin) (CD antigen CD325)	0.000581488	integral component of presynaptic membrane	presynaptic membrane	0	-0.545397	-0.329665	-0.0887258	0.0484208	-3.07581	-2.97715	-0.0622479	-	+	FALSE	-	-	TRUE	-	-	-	TRUE	TRUE
P16054	Prkce	1	Protein kinase C epsilon type, EC 2.7.11.13 (nPKC-epsilon)	3.13418e-05	presynaptic cytosol	cytosol, cytoskeleton, endosome	0	0.524635	0.610689	0.71438	0.060236	-6.65414	-6.63051	-0.178766	+	+	TRUE	+	-	FALSE	+	-	-	FALSE	FALSE
P16858	Gapdh	6	Glyceraldehyde-3-phosphate dehydrogenase, GAPDH, EC 1.2.1.12 (Peptidyl-cysteine S-nitrosylase GAPDH, EC 2.6.99.-)	1.33339e-07	extrinsic component of synaptic vesicle membrane	NA	0	0.155532	0.978839	1.61124	0.474225	1.6051	0.784547	NA	+	+	TRUE	+	NA	NA	+	+	+	TRUE	TRUE
P18242	Ctsd	NA	Cathepsin D, EC 3.4.23.5	0.171428	presynaptic endosome	cytosol, cytoskeleton, endosome	0	0.020445	0.2879	0.4511	0.206894	NA	NA	0.499519	+	+	TRUE	+	+	TRUE	+	NA	NA	NA	NA
P20444	Prkca	6	Protein kinase C alpha type, PKC-A, PKC-alpha, EC 2.7.11.13	8.25888e-05	presynaptic cytosol	cytosol, cytoskeleton, endosome	0	0.426248	0.400991	0.984412	0.060365	NA	NA	NA	+	+	TRUE	+	NA	NA	+	NA	NA	NA	NA
P22892	Ap1g1	1	AP-1 complex subunit gamma-1 (Adaptor protein complex AP-1 subunit gamma-1) (Adaptor-related protein complex 1 subunit gamma-1) (Clathrin assembly protein complex 1 gamma-1 large chain) (Gamma-adaptin) (Gamma1-adaptin) (Golgi adaptor HA1/AP1 adaptin subunit gamma-1)	0.0790206	presynapse	presynapse	0	0.754802	0.454332	0.529646	-0.146814	0.329885	0.318931	NA	+	-	FALSE	+	NA	NA	+	+	+	TRUE	TRUE
P23818	Gria1	5	Glutamate receptor 1, GluR-1 (AMPA-selective glutamate receptor 1) (GluR-A) (GluR-K1) (Glutamate receptor ionotropic, AMPA 1, GluA1)	1.5264e-05	integral component of presynaptic active zone membrane	presynaptic active zone	0	0.565647	0.752666	1.15063	0.0733231	NA	NA	-1.621	+	+	TRUE	+	-	FALSE	+	NA	NA	NA	NA
P23819	Gria2	5	Glutamate receptor 2, GluR-2 (AMPA-selective glutamate receptor 2) (GluR-B) (GluR-K2) (Glutamate receptor ionotropic, AMPA 2, GluA2)	7.33059e-05	integral component of presynaptic active zone membrane	presynaptic active zone	0	0.790804	1.18853	1.19819	0.265806	0.334823	3.60769	NA	+	+	TRUE	+	NA	NA	+	+	+	TRUE	TRUE
P26645	Marcks	3	Myristoylated alanine-rich C-kinase substrate, MARCKS	1.18348e-07	anchored component of presynaptic membrane	presynaptic membrane	0	-1.25837	-1.44472	-1.76111	-1.42773	-1.92009	-0.259403	-0.945726	-	-	TRUE	-	-	TRUE	-	-	-	TRUE	TRUE
P28663	Napb	5	Beta-soluble NSF attachment protein, SNAP-beta (Brain protein I47) (N-ethylmaleimide-sensitive factor attachment protein beta)	1.83372e-07	presynaptic active zone membrane	presynaptic active zone	0	0.605968	1.12335	1.63261	0.341234	3.07211	1.93583	0.614771	+	+	TRUE	+	+	TRUE	+	+	+	TRUE	TRUE
P28667	Marcksl1	4	MARCKS-related protein (Brain protein F52) (MARCKS-like protein 1) (Macrophage myristoylated alanine-rich C kinase substrate, Mac-MARCKS, MacMARCKS)	2.64828e-10	anchored component of presynaptic membrane	presynaptic membrane	0	-0.864186	-1.36775	-3.84902	-4.33375	-1.86878	-0.82686	-1.71741	-	-	TRUE	-	-	TRUE	-	-	-	TRUE	TRUE
P30999	Ctnnd1	4	Catenin delta-1 (Cadherin-associated Src substrate, CAS) (p120 catenin, p120(ctn)) (p120(cas))	8.25573e-06	presynaptic active zone cytoplasmic component	presynaptic active zone	0	0.479645	0.316037	-0.193055	-0.163542	1.71398	-8.83493	-1.36699	-	-	TRUE	+	-	FALSE	+	+	-	TRUE	FALSE
P31648	Slc6a1	5	Sodium- and chloride-dependent GABA transporter 1, GAT-1 (Solute carrier family 6 member 1)	1.88912e-05	integral component of presynaptic membrane	presynaptic membrane	0	0.577879	0.970001	1.04718	0.357152	-1.07904	-0.67819	-0.10076	+	+	TRUE	+	-	FALSE	+	-	-	FALSE	FALSE
P31650	Slc6a11	NA	Sodium- and chloride-dependent GABA transporter 3, GAT-3 (Sodium- and chloride-dependent GABA transporter 4, GAT-4) (Solute carrier family 6 member 11)	0.938006	integral component of presynaptic membrane	presynaptic membrane	0	0.0854346	0.125439	0.109626	0.0904725	-0.307313	1.7617	0.376139	+	+	TRUE	+	+	TRUE	+	-	+	FALSE	TRUE
P35278	Rab5c	3	Ras-related protein Rab-5C, EC 3.6.5.2	0.137733	anchored component of synaptic vesicle membrane	NA	0	-0.114643	-0.277969	-0.363386	-0.263265	2.73358	0.654194	NA	-	-	TRUE	-	NA	NA	-	+	+	FALSE	FALSE
P35279	Rab6a	4	Ras-related protein Rab-6A, Rab-6	0.280813	presynapse	presynapse	0	0.0170055	-0.195104	0.034594	0.293393	-3.36499	-3.64627	0.162063	+	+	TRUE	-	+	FALSE	+	-	-	FALSE	FALSE
P35564	Canx	NA	Calnexin	0.627691	integral component of presynaptic active zone membrane	presynaptic active zone	0	-0.139166	-0.184293	-0.240095	-0.609024	0.752232	1.18287	-0.173862	-	-	TRUE	-	-	TRUE	-	+	+	FALSE	FALSE
P35802	Gpm6a	1	Neuronal membrane glycoprotein M6-a, M6a	6.16254e-05	integral component of presynaptic active zone membrane	presynaptic active zone	0	0.756834	1.08417	1.48672	0.406159	0.897892	2.08211	0.717256	+	+	TRUE	+	+	TRUE	+	+	+	TRUE	TRUE
P35922	Fmr1	3	Synaptic functional regulator FMR1 (Fragile X mental retardation protein 1 homolog, FMRP, Protein FMR-1, mFmr1p)	9.90383e-05	presynaptic cytosol	cytosol, cytoskeleton, endosome	0	-1.04583	-0.869778	-1.02565	-0.386	-6.28096	-4.16365	NA	-	-	TRUE	-	NA	NA	-	-	-	TRUE	TRUE
P35979	Rpl12	3	60S ribosomal protein L12	8.74384e-09	presynaptic ribosome	presynaptic ribosome and ER	0	-0.782006	-1.11302	-1.39238	-0.491575	-1.42432	-1.58186	-0.411729	-	-	TRUE	-	-	TRUE	-	-	-	TRUE	TRUE
P35980	Rpl18	3	60S ribosomal protein L18	2.89301e-07	presynaptic ribosome	presynaptic ribosome and ER	0	-1.70192	-1.88469	-1.51386	-0.416542	-0.600243	-0.347906	-0.568546	-	-	TRUE	-	-	TRUE	-	-	-	TRUE	TRUE
P39053	Dnm1	5	Dynamin-1, EC 3.6.5.5	1.68143e-08	presynaptic endocytic zone membrane	presynaptic endocytic zone	0	2.01973	3.2605	4.03261	0.598027	2.80506	3.55932	NA	+	+	TRUE	+	NA	NA	+	+	+	TRUE	TRUE
P41105	Rpl28	3	60S ribosomal protein L28	2.04834e-05	presynaptic ribosome	presynaptic ribosome and ER	0	-1.17856	-1.57378	-1.42519	-1.39013	-2.06587	-1.20222	-1.22823	-	-	TRUE	-	-	TRUE	-	-	-	TRUE	TRUE
P42859	Htt	5	Huntingtin (Huntington disease protein homolog, HD protein homolog) [Cleaved into: Huntingtin, myristoylated N-terminal fragment ]	9.64397e-10	presynaptic cytosol	cytosol, cytoskeleton, endosome	0	0.727639	1.44659	1.34978	0.177182	NA	NA	NA	+	+	TRUE	+	NA	NA	+	NA	NA	NA	NA
P43006	Slc1a2	5	Excitatory amino acid transporter 2 (GLT-1) (Sodium-dependent glutamate/aspartate transporter 2) (Solute carrier family 1 member 2)	3.88254e-08	integral component of presynaptic membrane	presynaptic membrane	0	3.14776	4.26712	4.53652	0.667655	3.01389	3.38925	2.31023	+	+	TRUE	+	+	TRUE	+	+	+	TRUE	TRUE
P46096	Syt1	5	Synaptotagmin-1 (Synaptotagmin I, SytI) (p65)	7.55271e-07	integral component of synaptic vesicle membrane	NA	0	2.22268	2.80471	3.68474	0.533797	-0.638663	2.24618	1.79899	+	+	TRUE	+	+	TRUE	+	-	+	FALSE	TRUE
P46460	Nsf	5	Vesicle-fusing ATPase, EC 3.6.4.6 (N-ethylmaleimide-sensitive fusion protein, NEM-sensitive fusion protein) (Suppressor of K(+) transport growth defect 2, Protein SKD2) (Vesicular-fusion protein NSF)	6.56828e-09	presynaptic cytosol	cytosol, cytoskeleton, endosome	0	1.69153	2.53348	3.12553	0.564214	3.26223	2.05838	1.12921	+	+	TRUE	+	+	TRUE	+	+	+	TRUE	TRUE
P46638	Rab11b	3	Ras-related protein Rab-11B, EC 3.6.5.2	1.73938e-06	anchored component of synaptic vesicle membrane	NA	0	-0.805664	-1.04851	-0.823224	-0.221822	0.356827	-0.750859	NA	-	-	TRUE	-	NA	NA	-	+	-	FALSE	TRUE
P47708	Rph3a	5	Rabphilin-3A (Exophilin-1)	1.56237e-07	extrinsic component of synaptic vesicle membrane	NA	0	2.59279	3.73604	4.19091	0.42158	NA	NA	0.78391	+	+	TRUE	+	+	TRUE	+	NA	NA	NA	NA
P47743	Grm8	1	Metabotropic glutamate receptor 8, mGluR8	0.07679	integral component of presynaptic active zone membrane	presynaptic active zone	0	0.333661	0.320431	0.302246	0.732212	NA	NA	0.513411	+	+	TRUE	+	+	TRUE	+	NA	NA	NA	NA
P47746	Cnr1	5	Cannabinoid receptor 1, CB-R, CB1 (Brain-type cannabinoid receptor)	2.17026e-05	integral component of presynaptic membrane	presynaptic membrane	0	0.453755	1.20261	1.33191	0.18252	NA	NA	0.929249	+	+	TRUE	+	+	TRUE	+	NA	NA	NA	NA
P47911	Rpl6	3	60S ribosomal protein L6 (TAX-responsive enhancer element-binding protein 107, TAXREB107)	1.93788e-07	presynaptic ribosome	presynaptic ribosome and ER	0	-1.21092	-1.16348	-1.37316	-0.532116	-1.28245	-0.384351	-0.550925	-	-	TRUE	-	-	TRUE	-	-	-	TRUE	TRUE
P47915	Rpl29	3	60S ribosomal protein L29	4.38812e-06	presynaptic ribosome	presynaptic ribosome and ER	0	-1.66217	-1.60798	-1.58969	-1.17713	-2.20606	1.11361	-0.199894	-	-	TRUE	-	-	TRUE	-	-	+	TRUE	FALSE
P47962	Rpl5	3	60S ribosomal protein L5	5.63438e-09	presynaptic ribosome	presynaptic ribosome and ER	0	-0.756838	-1.15802	-1.31716	-0.443119	-1.56258	-1.48405	-0.370974	-	-	TRUE	-	-	TRUE	-	-	-	TRUE	TRUE
P47963	Rpl13	3	60S ribosomal protein L13 (A52)	1.43226e-06	presynaptic ribosome	presynaptic ribosome and ER	0	-1.62035	-2.04086	-1.7809	-0.517815	-2.28324	-0.541125	-0.0628242	-	-	TRUE	-	-	TRUE	-	-	-	TRUE	TRUE
P50396	Gdi1	NA	Rab GDP dissociation inhibitor alpha, Rab GDI alpha (Guanosine diphosphate dissociation inhibitor 1, GDI-1)	0.503691	presynaptic cytosol	cytosol, cytoskeleton, endosome	0	0.0984563	-0.0920262	-0.0980222	0.157164	0.0837817	-0.521912	-0.0679543	-	+	FALSE	-	-	TRUE	+	+	-	TRUE	FALSE
P50516	Atp6v1a	5	V-type proton ATPase catalytic subunit A, V-ATPase subunit A, EC 7.1.2.2 (V-ATPase 69 kDa subunit) (Vacuolar proton pump subunit alpha)	9.47828e-08	extrinsic component of synaptic vesicle membrane	NA	0	1.03118	1.58739	2.10471	0.569701	0.38717	1.48465	1.13703	+	+	TRUE	+	+	TRUE	+	+	+	TRUE	TRUE
P50518	Atp6v1e1	6	V-type proton ATPase subunit E 1, V-ATPase subunit E 1 (V-ATPase 31 kDa subunit, p31) (Vacuolar proton pump subunit E 1)	2.3933e-07	extrinsic component of synaptic vesicle membrane	NA	0	0.302092	0.988844	1.60667	0.592576	1.13404	1.78634	0.283516	+	+	TRUE	+	+	TRUE	+	+	+	TRUE	TRUE
P51150	Rab7a	6	Ras-related protein Rab-7a, EC 3.6.5.2	0.0103594	anchored component of synaptic vesicle membrane	NA	0	0.0919168	0.174815	0.273392	-0.339156	NA	NA	-0.38386	+	-	FALSE	+	-	FALSE	+	NA	NA	NA	NA
P51410	Rpl9	3	60S ribosomal protein L9	3.53729e-06	presynaptic ribosome	presynaptic ribosome and ER	0	-0.794081	-0.97975	-1.14886	-0.558968	-2.82418	-2.74821	NA	-	-	TRUE	-	NA	NA	-	-	-	TRUE	TRUE
P51791	Clcn3	NA	H(+)/Cl(-) exchange transporter 3 (Chloride channel protein 3, ClC-3) (Chloride transporter ClC-3)	0.230777	integral component of synaptic vesicle membrane	NA	0	0.407447	-0.355463	-0.121723	0.230419	NA	NA	-0.358423	-	+	FALSE	-	-	TRUE	+	NA	NA	NA	NA
P51863	Atp6v0d1	5	V-type proton ATPase subunit d 1, V-ATPase subunit d 1 (P39) (Physophilin) (V-ATPase 40 kDa accessory protein) (V-ATPase AC39 subunit) (Vacuolar proton pump subunit d 1)	8.74384e-09	integral component of synaptic vesicle membrane	NA	0	1.17484	1.82378	2.35082	0.48302	2.15457	5.13235	1.59854	+	+	TRUE	+	+	TRUE	+	+	+	TRUE	TRUE
P52795	Efnb1	3	Ephrin-B1 (CEK5 receptor ligand, CEK5-L) (EFL-3) (ELK ligand, ELK-L) (EPH-related receptor tyrosine kinase ligand 2, LERK-2) (Stimulated by retinoic acid gene 1 protein) [Cleaved into: Ephrin-B1 C-terminal fragment, Ephrin-B1 CTF; Ephrin-B1 intracellular domain, Ephrin-B1 ICD ]	0.012374	integral component of presynaptic membrane	presynaptic membrane	0	-0.436093	-0.624519	-0.764391	NA	-5.71928	-6.63051	-0.835642	-	NA	NA	-	-	TRUE	-	-	-	TRUE	TRUE
P53994	Rab2a	7	Ras-related protein Rab-2A, EC 3.6.5.2	0.000116515	anchored component of synaptic vesicle membrane	NA	0	-0.883067	-0.901118	-0.600097	-0.167897	-0.793182	-1.43497	-0.568594	-	-	TRUE	-	-	TRUE	-	-	-	TRUE	TRUE
P56695	Wfs1	6	Wolframin	2.37703e-05	integral component of synaptic vesicle membrane	NA	0	0.250697	0.874306	1.26923	0.35858	NA	NA	-0.291364	+	+	TRUE	+	-	FALSE	+	NA	NA	NA	NA
P57746	Atp6v1d	5	V-type proton ATPase subunit D, V-ATPase subunit D (V-ATPase 28 kDa accessory protein) (Vacuolar proton pump subunit D)	0.000820497	extrinsic component of synaptic vesicle membrane	NA	0	1.30536	1.70334	2.25484	0.45611	4.10812	2.24243	0.0201278	+	+	TRUE	+	+	TRUE	+	+	+	TRUE	TRUE
P60469	Ppfia3	5	Liprin-alpha-3 (Protein tyrosine phosphatase receptor type f polypeptide-interacting protein alpha-3, PTPRF-interacting protein alpha-3)	0.00015475	presynaptic active zone cytoplasmic component	presynaptic active zone	0	1.01014	0.968683	0.854599	0.174063	1.19484	-6.63051	NA	+	+	TRUE	+	NA	NA	+	+	-	TRUE	FALSE
P60879	Snap25	5	Synaptosomal-associated protein 25, SNAP-25 (Super protein, SUP) (Synaptosomal-associated 25 kDa protein)	9.43739e-08	extrinsic component of presynaptic membrane	presynaptic membrane	0	0.99832	1.89644	2.19268	0.46548	1.82098	2.45966	1.44028	+	+	TRUE	+	+	TRUE	+	+	+	TRUE	TRUE
P60904	Dnajc5	6	DnaJ homolog subfamily C member 5 (Cysteine string protein, CSP) (Cysteine-string protein isoform alpha)	3.87799e-08	anchored component of synaptic vesicle membrane	NA	0	0.0580057	0.420863	1.17695	0.403922	-0.362235	2.03698	1.08655	+	+	TRUE	+	+	TRUE	+	-	+	FALSE	TRUE
P61021	Rab5b	NA	Ras-related protein Rab-5B, EC 3.6.5.2	0.0170265	anchored component of synaptic vesicle membrane	NA	0	-0.130227	0.143265	0.256146	-0.08557	-3.39287	-2.583	-0.159321	+	-	FALSE	+	-	FALSE	-	-	-	TRUE	TRUE
[truncated: 180 more rows]

## Sheet: SynGO_categories
Ontology_term	Ontology_group
[truncated: 26 more rows]

[truncated: 1 more sheets: SynGO_presynapse]
