# Supplementary material for: Dynamic proteomic and phosphoproteomic atlas of corticostriatal axons in neurodevelopment
Source: eLife. 2022 Oct 14;11:e78847. doi: 10.7554/eLife.78847 (PMC9629834; doi:10.7554/eLife.78847)
Supplement: Supplementary file 8. [file elife-78847-supp8.xlsx]

## Sheet: Source
Disorder	Source of List: Title	PMID/dio/webstite
Autism	Fu et al 2021 + SFARI 1 and 2	https://gene.sfari.org/database/human-gene; https://www.medrxiv.org/content/10.1101/2021.12.20.21267194v1
Developmental Delay	Prevalence and architecture of de novo mutations in developmental disorders	28135719
Epilepsy	De novo variants in neurodevelopmental disorders with epilepsy	29942082
ADHD	Discovery of the first genome-wide significant risk loci for attention deficit/hyperactivity disorder	30478444
Schizophrenia	Mapping genomic loci prioritises genes and implicates synaptic biology in schizophrenia/Current Broad Sz Priority Genes	https://doi.org/10.1101/2020.09.12.20192922
Major Depressive Disorder	Genome-wide association analyses identify 44 risk variants and refine the genetic architecture of major depression	29700475
Multiple Sclerosis	Multiple sclerosis genomic map implicates peripheral immune cells and microglia in susceptibility	31604244
Parkinson's Disease	A meta-analysis of genome-wide association studies identifies 17 new Parkinson's disease risk loci	28892059
Alzheimer's disease	A genome-wide association study with 1,126,563 individuals identifies new risk loci for Alzheimer’s disease	34493870
Glioma	Understanding inherited genetic risk of adult glioma – a review	26941959
Bipolar Disorder	Genome-wide association study identifies 30 loci associated with bipolar disorder	31043756

## Sheet: Gene lists
Developmental Delay	Epilepsy	ADHD	Major Depressive Disorder	Multiple Sclerosis	Parkinsons Disease	Alzheimer's	Glioma	Bipolar Disorder	Autism Spectrum Disorders	Schizophrenia
E9Q4N7	Q9Z351	ADHD	Q9CQW7	Q8VHH7	Q8BXK8	A2ASQ1	Glioma	P61166	F6SEU4	Q80TZ9
E9Q4F7	B1AWN6	P97325	Q8CHG5	P97490	Q8VC19	Q64735	O70372	Q9Z0R9	Q09XV5	Q80TT8
P16381	A2ASI5	Q8BW72	E9PZJ8	O88573	A2AB59	P19070	Q01279	Q0VAX3	Q9Z103	Q61548
Q62167	Q62205	A2A8L5	Q80Z10	Q91ZB0	A0A0B4J1F4	P51865	P55271	Q9JJE7	Q4ACU6	P23188
Q9Z103	A2APX8	A2A9C3	Q8CI32	Q8BLD6	Q9Z1G4	O55033	Q6PDH0	P12672	B1AWN6	Q60991
P55200	E9PZM4	Q06806	P86174	Q9CQE6	Q99PU7	O08539	P02340	Q01815	P0DI97	Q91W10
F6SEU4	Q9ERC8	Q08351	Q924M5	P54254	Q6RHR9	Q9QZE2	Q0VGM9	Q920L1	Q9CS84	Q9CWY3
B1AWN6	F6SEU4	Q9JJ66	A0A0A6YY25	Q9JMK0	Q9CQJ4	Q9WUU8	Q6H1L8	Q61006	O08586	O08584
A2ASI5	O08599	Q8R1F5	Q3UQA7	Q9WVK5	Q9JI08	Q8VIM0		A4QPC6	Q8BZH4	Q925F2
Q62205	Q9WTU3	P28571	Q61290	P97303	Q66JV7	P04230		Q64475	P58462	P70671
Q61214	Q8CFN5	Q9JLJ5	O08532	O35284	Q9DB16	P04231		P43276	E9PZM4	O55176
Q5XJV7	P31648	Q8K2I4	E9Q7T7	Q9D275	Q6PHZ2	P18468		Q8C3J5	Q01097	Q99NB9
Q9Z2D6	P48057	Q8CFN5	A3KFM7	Q80YN3	Q8VEG0	P18469		A6X935	Q3U8K7	D4PHA7
Q8C4A5	P39053	P58463	A2AJK6	P41183	Q7TQK0	Q99NH8		Q8CI11	E9Q4N7	Q8VI59
O08599	P10126	Q8VI51	O55229	Q67FY2	P56528	Q9JLQ0		Q3UR85	Q99MY8	P51791
Q9Z351	P62631	Q9JLB4	Q04447	Q7TN12	P51791	Q80X71		Q6GQV1	P31648	Q9WUA6
Q6JPI3	Q3UTQ8	Q9ERV7	Q99LI9	Q9CWU4	P35347	Q6IR42		Q3UF25	Q80Y84	P09470
Q02248	Q61214	Q9DBB1	Q8K4Q8	Q5NC83	P10605	Q06890		Q6NSU3	Q8C4A5	D0G895
Q8VI24	Q9CU62	Q9WTM3	Q8R409	Q923T9	Q80WW9	Q91WA6		Q99PN3	Q9JHU4	Q8C0X2
Q91VM3	P63080	Q76KF0	P30999	Q8CIS0	Q6P5E8	Q80XC3		E9PXB6	Q61214	O88338
P49698	Q5DTT1	P97291	Q9R1S7	Q3TTA7	E9Q8T7	D3YZP9		Q9Z1J2	Q99MR1	Q9R100
Q60722	Q8C4A5		P70211	Q9D273	Q9D2Y9	Q99LC5		Q8BSQ9	Q62108	Q99M87
Q924A0	Q91VM3		Q8K382	Q9ES57	P08101	Q9DCW4		Q9JK39	Q04690	Q91ZP6
B2RWS6	E9Q4N7		Q9D2G2	Q6XJV6	P08508	Q921G7		Q8C1Q6	B1AYB6	Q6PEB6
P58462	P18872		P61168	Q5UKY4	P54818	Q80U28		Q9D6Y7	Q5DW34	Q8BWQ5
Q69ZA1	Q9D8C3		P59900	Q6XJV4	P17439	Q99N05		Q9D958	O08599	Q9CQ18
Q9CU62	B2RRE7		A6H6E2	Q8K4F0	Q8BWM0	Q7M6Y3		Q61704	Q5SWW4	Q923L3
P42669	Q60603		Q8BHR2	P31041	Q05915	O88307		Q99P91	Q8VI24	P21995
Q8BHJ5	Q01097		B2RWS6	P18181	Q8K259	Q8CIB5		Q9CR53	P48381	Q07916
Q8VHR5	Q8VEK3		O08537	Q61003	Q99P91	P59729		Q64478	Q9Z1T5	Q6P5F9
Q8VH37	P42669		Q920L1	P42082	Q61038	O35598		Q8CGP1	Q5XJV7	Q9D2A5
Q8K212	P63137		Q61006	Q8BL00	P01910	Q8BVF7		P10853	Q9R0K7	Q7TT15
P31648	Q9EQG9		Q9Z0R9	Q99LL3	P04227	Q8C7N7		Q8R4Y4	Q8R1B8	Q68FD9
P48057	Q9Z2D6		Q0VAX3	O35454	P04228	Q9DCZ9		Q99JI1	Q6JPI3	Q01815
Q6PAL7	Q60987		Q9JJE7	Q80U30	P14434	Q3UU41		Q8BHZ4	P62743	Q9JMH6
P18872	E9Q4F7		P12672	Q91V08	P14435	P28798		P25976	Q8C8R3	Q80T41
Q8VEK3	P60879		Q3TNH5	Q80XD9	P14436	Q8BYZ1		Q3USZ2	Q5NCY0	Q80Z24
Q80TG1	P16381		Q9CTH6	Q8VI21	P14437	P09470		Q9QYB5	Q69Z98	Q8BHR2
Q60737	Q62167		P39749	Q9D676	P14438	D0G895		Q9CWR1	Q9JLV5	A2AKY4
O54833	Q5DU25		P06909	Q8C1T8	P23150	Q91V24		Q62445	Q6KCD5	Q61200
Q8BRB7			P97807	Q9WVF9	P27931	P08226		Q9EQU3	Q8BRH4	B0F2B4
Q01097			P35951	P47936	Q80V72	Q3UQ22		O08674	O55047	Q91YI1
E9PZM4			O89106	P26955	Q9QUM0	Q63994		Q9JMD1	O08791	P82347
Q9ERC8			Q61626	P26954	A2ARA8	P97484		Q8R0K2	Q6PDG5	P35822
Q9D8C3			Q3UVX5	P49935	Q61702	Q08EC4		Q8BV79	O88508	Q99PV8
B2RRE7			Q9R0Z9	P70658	Q61704	P12023		Q9WUT3	Q8K3F6	Q69Z26
Q8BZ21			Q61646	Q64441	A6X935	Q6PFX7		Q8K212	Q924H7	Q9JMB8
Q3UTQ8			Q921I1	P54823	Q80TG1	Q9D7J9		Q99PV8	A2APX8	Q8CHY6
O35604			Q03717	Q9D6N5	Q9D1P2	P26595		Q61702	Q9QYY8	Q9QUQ5
Q8BZH4			O88447	Q8BPU7	Q8BUL5	Q63969		Q8CC27	Q02248	Q0II04
Q8CFN5			P59178	O54839	Q61595	P22599		Q3TCH7	P55200	Q9DC07
Q5DW34			Q45KJ6	Q8R0W0	Q9EP89	Q00896		Q03717	Q8K3X4	Q9WVH4
B2RSH2			Q7TNN8	Q60902	Q5S006	Q00897		Q07230	Q5F2E8	P97772
O70589			Q99PI4	P81270	Q9CQQ8	Q00898		Q9QXS1	Q08460	P0C192
Q5DU25			Q8BXA0	Q9ET47	P08923	P29621		Q9CYZ8	Q60698	Q80TG1
P97471			Q8C1S0	P27577	P97820	Q03734		P61957	Q6ZPK0	P35347
Q61164			Q8CFN5	P97366	P10637	P17433		Q8CIE4	Q61483	P10637
P45481			Q9QWV4	Q9DB60	Q99MR8	O35551		Q91VW9	Q80UM3	A6PWY4
Q6DIC0			Q922D8	Q9D6I7	Q5SWW4			Q8BX94	E9Q4F7	P27773
Q9QY36			Q9JMH9	P58462	Q9CTY5			P35436	Q8K0L9	Q9JJG7
Q3UX61			Q3UZZ4	Q8C0V9	Q9ESJ4			P26883	P70206	Q61127
P83877			P32114	Q99KR8	Q59J78			P45878	Q9ERC8	P27046
Q8K327			Q02650	P23772	Q80TM9			Q9R0P6	P62812	Q8BTQ0
Q9QZ67			P63015	P70338	Q80XU3			Q9D8V7	Q80YQ2	Q9Z2F7
O88491			Q91Y11	Q60631	Q8CIC2			Q8VC19	A0A087WPF7	Q8BPT6
Q9EQG9			Q91Y20	Q69ZS7	Q9CQ04			Q3TNW5	Q61164	Q8CHU3
P39053			O88689	P43120	Q7TPH6			Q9JI11	Q6P9K8	P35802
Q80YA9			Q91Y13	P09022	P97467			Q8C172	Q80Z38	Q9R1S7
Q8K0V4			Q9QYX7	Q9ESY9	Q8R1G6			Q9JM14	Q9EPQ8	P70211
P33173			Q9WVQ0	Q9CQW9	Q9DAG9			Q9WV18	P42337	O55143
A2APX8			Q9DAC9	O08900	O35047			P63072	Q03717	Q920Q6
Q9WVG9			Q8BII1	Q6PHB0	O70348			P07978	Q8CFN5	Q3ULB5
Q60603			Q99P58	P01590	Q61818			Q32P12	Q60737	Q9WTX8
Q8K3F6			P46061	P16872	Q5GAM8			P68433	Q8K212	P59823
Q9QYE3			Q9JJ43	Q8CBR1	Q80ZJ1			Q8VHS5	Q02650	P58462
P10126			Q9JHG6	Q80V86	Q80TE0			Q8BWL5	P27038	Q8BIP0
P62631			Q05186	Q8BP00	Q60611			Q9D1G5	Q60722	Q80TM6
Q924H7			Q80TZ9	P23611	B1AWN6			Q922B1	Q924A0	A2AP18
O08586			Q8CHX7	Q6ZQF7	A2ASI5			P30355	P70227	P97500
Q9WUK6			Q9R1A8	P52332	Q62205			Q6ZWR6	O08553	Q9CQB5
P35486			Q8R2S1	Q80ZQ5	Q62420			Q9WVE8	P61982	Q7TMY4
P70257			Q9DBU6	Q3U492	Q8BJA2			Q9WTX8	Q9EP53	Q3UV71
Q09XV5			Q8K0T0	Q8BLB7	Q9CWV4			Q9R1C8	Q6DIC0	Q80Y81
P63080			Q9WTM3	Q8R043	O55042			P68500	Q6P9K9	Q99MN9
P70398			Q76KF0	Q9CX60	Q9R1Z8			P39749	Q8C985	P61164
Q9JHU4			Q9CZN4	P06240	A2A6C4			Q8K3A2	Q80TP3	Q8R5C5
Q3U8K7			P70390	P27782	Q925E8			Q80TF6	P97500	Q80TI0
Q60987			Q61045	O54785	Q9WTN3			P23188	Q69ZA1	Q62445
Q9EPQ8			O70579	Q8BFW7	Q8R4Y4			Q8R1R3	P41778	Q80Y98
Q9WTU3			Q3T9X0	Q9DAM1	Q9Z1W9			P16627	P84309	Q80ZF8
Q3UEB3			Q5IRJ6	P50284	Q920M7			Q9QUM7	P05142	O89106
Q68FG0			Q8VI51	O88188	Q71LX4			Q9D2R8	P05143	P35436
P97500			P35710	P54843	Q9EQU3			J3QMY9	Q8R1U2	Q8CBD1
Q6PDQ2			Q9CUS9	Q9CQY7	Q8C996			Q8C796	Q00PI9	Q04742
Q0KL02			Q6ZWQ0	Q2TBA3	Q9CXY1			Q8R2V3	Q80Y50	Q925N0
P11881			Q66JZ4	Q9WUL6	Q8BFQ2			D4PHA7	Q9DBG7	Q9R1P0
P28028			P49698	P63085	P58771			Q8BFV2	Q2VPU4	Q8VE88
Q76MZ3			Q60722	Q63844	Q8VCK3			Q6P1B1	Q60575	Q9D7I8
P35235			Q924A0	Q6NZQ8	Q6NV66			Q3V209	Q7TPD0	Q63844
Q9EQU5			Q9WTS5	Q60805				P52483	Q7TMK9	Q9CPY0
A0A087WPF7			Q80X71	Q9WU20				Q05BC3	Q80T41	B1AX39
Q9R0M8			Q8C2L6	O70468				Q7TNG5	Q05512	Q2TA57
Q80Y84			P61166	P97369				Q8BLQ9	Q8BHJ5	Q8VC85
P59598			Q9D710	Q91W39				P68404	Q9JHZ2	Q2VPU4
			E5FYH1	Q8R0W6				Q80WM4	Q9ER47	Q8R1F5
			Q80XC2	Q99KS2				Q8BG89	E9PYL2	Q8VDB2
			Q8BN21	C3VPR6				Q05512	Q62441	Q9DB54
			Q9R0I7	Q11011				Q8C120	P46096	Q3UD82
			B1AX39	Q3UV55				Q9JHA8	A2AAJ9	O88704
			Q8VDZ4	Q920N1				P62259	Q9QXJ1	O88689
			Q8R2V3	Q5M8M2				P97390	Q61301	Q91Y20
			Q8K083	Q6PFG8				Q61735	O70481	Q91Y11
				Q8K2C7				Q9JIY0	Q60865	Q99MH5
				Q61409				O89029	P28660	Q8R3B7
				O89084				O35083	A2A8L5	P38647
				Q61753				Q80TL1	P97367	Q8BWY3
				Q6PDH0				Q91WU2	Q9JMK2	Q8BXQ8
				Q6ZPQ6				Q8BGP5	Q6ZPY7	Q6ZPY7
				Q9JHK5				Q9ESF4	Q9CU65	Q8VCD6
				Q9QZC2				Q9Z2D3	Q6EBV9	O35118
				P99029				Q9D9D3	Q62504	P48967
				P02319				F2Z472	Q9Z2J6	Q9QZ03
				A2AVJ5				P30933	Q6PAL7	Q9JHI9
				Q9D3U0				Q9Z1Q5	Q5SPL2	Q8VHR5
				O35719				Q61983	Q8BG32	Q3U182
				Q8CFE3				Q7TSC1	Q6P2B1	Q3U1Y4
				P97492				P04919	G5E870	P23818
				Q9D3G9				O35144	Q64436	Q91WD7
				P62071				Q9Z1D7	Q08122	Q6PFD6
				Q64131				Q8BHE4	P23819	Q9DCL4
				Q9R1T2				P61315	B1AWL2	Q8BHD1
				O09039				Q8K039	Q61290	Q03141
				Q9QUM4				Q6P9L6	P28659	Q62415
				Q9JKN1				Q9Z2V6	Q6NZM9	P59325
				Q8C0X2				P62806	Q60520	Q8VCM3
				Q3TKT4				Q9CQG0	Q91YI1	O88447
				O35716				Q00896	P45481	Q9CXE6
				Q04886				Q9JHY4	G3X939	P56379
				Q924S7				Q9WTL8	Q61818	Q14BI7
				P42227				Q9CQW3	Q5SQX6	O55229
				Q9JLY0				P97825	Q9ESG2	Q04447
				P42228				Q01705	Q7TPD1	Q80XC2
				B2RWW0				Q80W71	P35710	Q8CI32
				P0CAX8				Q80Z38	Q9Z1L3	A0JNU3
				P70327				Q9R0A1	Q3UA37	Q9CQW7
				Q00417				Q99PP2	Q9WTU0	Q8C6A8
				Q4JK59				G5E8K5	Q6R891	Q9CZ00
				O88393				Q9ERS5	Q9Z0R4	P31428
				Q8BGW0				Q8CI33	P50615	Q96EQ9
				Q8BUY5				P13595	Q8BQZ4	Q99J78
				Q921Z5					O08810	Q8R3L2
				P25118					O55192	Q60779
				Q9QYH9					Q8CJF8	E9Q4F7
				Q60803					Q8CFT2	Q9D1P0
				Q8BVW3					Q8BWT5	P47963
				Q1PSW8					Q7TSZ8	Q0VE82
				P42682					O89053	Q3UMM4
				Q9R117					P11798	Q9JL70
				Q99PL6					Q91V92	Q3ULF4
				Q91ZD4					Q8R5C8	Q01727
				P29533					O88685	Q9ERD7
				Q99KU0					Q80TQ2	Q5U458
				Q91WL8					Q60668	Q8BJ25
				Q64321					Q80TN7	Q8K2W6
				Q3UPF5					A2A935	Q3U410
				Q6P1E1					P48025	Q1H9T6
				Q8BG89					Q9Z0H4	Q3UEB3
				Q9CQK1					O88491	Q80U72
									Q66JY2	Q91V36
									Q9CQL7	Q8BW72
									P39429	P97325
									Q8BWZ3	A2A8L5
									Q9ESN9	Q8CFN5
									Q8BQP8	Q8C2L6
									Q8VBZ3	Q924C5
									P48542	Q9R0P6
									Q80X66	Q9D8V7
									Q80U30	Q8BHZ4
									Q8BIA3	Q07230
									Q9CWL2	Q9CWR1
									P70298	Q99P91
									Q9JMH9	Q9CR53
									Q01705	O35074
									Q9CXS4	Q03717
									Q9Z180	Q922T2
									Q6PDH0	Q6P9S7
									P37238	Q8CHR6
									P63080	Q9JIY0
									Q6P5F9	P97390
									P54265	P12025
									Q8BKI2	A2AH22
									Q9Z1K5	Q80UP3
									Q64336	Q9Z125
									O89001	Q5FWK3
									Q8BPX9	Q8BR93
									Q8BG26	Q8VDN4
									Q9JME5	Q4VA44
									P01027	Q8K3W0
									P97464	Q8R1Q9
									Q6PDS3	Q9CQP0
									P70662	P61406
									Q8K4J6	Q9QZX7
									P27106	Q9R0G7
									E9Q8T7	D3YWQ0
									Q9Z1D1	Q80YA9
									Q99PH1	Q9CW73
									A2AVA0	Q3UPY5
									Q6NZR2	O54774
									Q61909	Q62203
									O54774	Q8BWL5
									Q9ESP5	Q8BTG7
									Q6P4T2	Q6ZQ08
									Q7TSY6	Q8VBW5
									Q7TNB8	Q6DFY8
									P21661	Q9D2X5
									Q6PCL9	D3Z7H8
									Q6P9L4	Q925K9
									Q7M6Z0	Q9ERS2
									P63087	F6W8I0
									Q61183	Q9WTR0
									P97489	Q9Z109
									Q8C5W3	Q6NZR2
									Q9JLK7	P60761
									Q91W50	Q9Z2H2
									Q8BUD0	Q91W50
									P49962	Q9CPR7
									Q91VW5	Q922J6
									Q5XJV6	Q62209
									Q9D5V5	P54099
									Q99J21	Q9Z275
									A2A690	Q8K368
									Q921M3	Q9QXM0
									P06876	Q3UG20
									Q80U28	O54781
									Q9D8W5	Q61387
									Q9ESN2	Q5U4C3
									O88343	Q8BI21
									Q80U59	Q8R4G9
									Q8C079	Q8R493
									Q811P8	Q2MKA5
									P63101	O08543
									Q91VL9	P46460
									Q7TSE6	P17553
									P21836	A2A6C4
									P60710	Q7TSI1
									P03958	Q8BN21
									Q8VHH7	Q5SP85
									P54822	Q9CR14
									O55112	Q3THF9
									Q3UHD9	Q64433
									Q8CJG1	P63038
									Q70FJ1	Q8CHX7
									Q8BWF0	Q80VR2
									Q3V1D3	C0HKD8
									Q8CFA2	C0HKD9
									G5E8K5	P84102
									Q8CJG0	A2ARP9
									P10107	A2ARP1
									Q8BVF7	Q6P5H6
									Q3UTH8	Q5XK03
									O35085	Q8VIM6
									Q7SIG6	A2AFR3
									Q8CJ27	P84084
									Q80Z10	P32115
									O54827	Q99PH1
									Q61687	Q78PY7
									Q62463	Q9CWV4
									A2AUY4	O55042
									O55028	O35382
									Q9QYE3	A2AR50
									P28028	P62259
									F8VPZ9	Q9CWG8
									P97445	Q8C547
									Q01815	O55106
									Q99246	Q8K1Y2
									O88427	Q9CYK2
									Q9Z1L5	Q8BTE5
									Q8CC27	Q3U3T8
									O70589	Q3U276
									Q8K1A6	Q7TNF0
									P51945	Q6ZQ29
									P80315	Q9D123
									Q7TT50	P53351
									Q9WTR5	Q9JME5
									Q3UTQ8	P70166
									Q6P5D4	Q99LI5
									Q99NF3	Q8CIR4
									Q6AW69	Q9ERG0
									Q8K327	Q61466
									A2AJK6	Q6NXK8
									Q921W0	Q9D9R9
									P49582	Q8CJG1
									Q9Z309	Q80YR7
									Q924A2	Q8CJF9
									Q80TV8	Q8CJF8
									Q80YA9	Q8BP99
									Q8K0V4	Q8CHK4
									O88689	Q04207
									P47746	Q80XI6
									Q69Z26	P46062
									P68500	Q3TAP4
									Q9JMB8	Q91Z31
									Q9CPW0	Q4ACU6
									Q99P47	Q8VHQ3
									Q6ZQ08	P51954
									Q7TN98	P32300
									O35927	Q8VE65
									B9EJA2	Q9CZ82
									Q8VE73	Q9JL60
									P53564	Q80VC6
									P70403	Q8VE37
									Q7TMB8	Q0PD08
									Q9QXT1	Q91YT7
									Q62167	Q501J7
									Q80Y98	Q8VCK5
									Q9CQJ6	Q9CXW3
									O88455	P32261
									Q811T9	Q9CR88
									Q91XM9	Q3U3S3
									Q9D415	A6H6A9
									Q64205	Q810N6
									Q8C147	Q80UF4
									Q6NXK7	Q6A065
									Q8BG67	P40764
									P70211	Q64317
									Q60900	Q6A0A9
									Q9ER73	Q9Z1B8
									B2RWS6	Q9WTU0
									Q8CHI8	Q8CC27
									Q8BMB0	Q9D4P0
									Q9DCW4	Q7TS68
									Q80TH2	Q8K4E0
									Q61554	Q80XQ2
									P35922	Q8K2I4
									Q60987	Q6ZWY6
									P58463	P61079
									P27681	Q5BKR2
									P97376	O88819
									P63137	Q9QYS2
									P03995	O89091
									Q5SV77	Q8R4I1
									Q6Y7W8	Q9DB40
									P51655	Q9JLV5
									Q8BUV3	Q80XM9
									P23818	Q06890
									Q61627	Q9QVP9
									P39087	Q91X60
									Q61626	P34914
									P35438	Q8C850
									P35436	Q5SSM3
									Q61026	Q9D7R2
									Q925T6	Q9D3E6
									Q8VDJ3	O70472
									P16092	Q3TC72
									Q6P9S7	Q24JP3
									B2RSH2	Q32NY4
									Q6I6G8	Q8BV79
									Q3UHF7	Q8BHJ5
									A2A884	Q80TB7
									P70333	Q6PDL0
									Q8VEK3	Q8VBW6
									Q61411	Q9ERQ8
									P97411	Q8C0V1
									Q9CXY6	P16092
									Q6PCM2	Q3UMZ3
									Q5DU25	Q6P2L6
									O54890	Q7TNU7
									Q62315	Q8BG89
									Q80TG1	Q9D1Q1
									Q9JHD1	Q9JLB0
									Q8BZ21	Q9Z2D3
									Q9D3R6	Q8VDZ4
									Q9JM63	Q8C1S0
									Q9Z351	P30999
									Q8BQZ8	Q3UQA7
									Q8VCD7	Q9D710
									P41230	A0A0A6YY25
									O70546	Q9DB75
									L0N7N1	O70252
									Q8BR86	Q9D2V7
									Q3UG20	Q8K2T1
									P02469	Q9CZ30
									Q5XJE5	Q9D8B1
									P18608	Q6NZN0
									Q3UXZ9	P62838
									Q91ZX7	Q91WA4
									Q8C031	Q8K394
									O88609	Q5SXY1
									Q9CQ33	Q6NSU3
									Q3UYG8	Q8BI36
									Q9QZ04	Q3UMR0
									Q9QYR6	Q9CQ04
									Q8CHK3	Q9DD18
									Q9Z2D6	Q99KK9
									P16056	Q9Z1M8
									Q8CH25	O89109
									Q8K480	Q8BXG3
									Q9WVG9	Q9Z1J2
									Q9JLN9	Q9CQ75
									Q61879	Q9JHW4
									Q99104	Q5SV80
									Q9QY06	Q3UQ22
									Q9EPN1	Q9CPW7
									Q60974	Q99MR1
									Q9WTM4	Q9JJ59
									Q6ZQ12	Q8CI11
									Q5DTT1	Q8BFQ4
									Q99K10	Q9CWB7
									Q69ZK9	Q99JB8
									Q8BYM5	Q9CQV8
									B0F2B4	Q8QZY2
									Q8VDD5	Q14B98
									P70365	Q80WM4
									Q8VII8	Q9QWR8
									Q06219	Q8BZ64
									E9Q7X7	Q91Y13
									Q641K5	Q3UF25
									Q9CQ48
									Q99J31
									Q8R554
									P97926
									Q60716
									P16331
									Q8CIN4
									Q9CSB4
									Q99P88
									Q99MN9
									Q80TF3
									Q8BVE8
									O54943
									Q8VDD9
									A6H619
									Q9Z1B3
									Q80UG2
									Q8CJH3
									Q91X88
									Q69ZK0
									Q3U5C7
									Q80Y24
									P68404
									Q8BZ03
									Q9WU79
									Q14B62
									Q9WVS6
									P67778
									Q9DAG9
									P52430
									Q60676
									Q8BKG3
									P35235
									Q8BV49
									P53994
									Q0PD08
									Q8CG50
									Q99NF8
									Q9JJ43
									Q5SFM8
									Q60841
									Q80TZ9
									Q99NE5
									Q7TPD3
									Q9R1T2
									Q60611
									Q6ZPE2
									Q9WTU3
									Q7TSH6
									Q62205
									Q62217
									Q9EQU5
									E9PYH6
									E9Q5F9
									D3YZU1
									Q91V14
									Q5I012
									Q61327
									P70423
									Q9Z127
									Q810B7
									P97471
									Q3TKT4
									Q9D8U8
									Q9QX47
									P70663
									O35696
									Q8VI51
									Q8K400
									O88935
									Q62311
									Q6ZQ29
									Q6NXY1
									Q8BM85
									Q920B9
									O35144
									Q4JK59
									Q91ZE0
									P97858
									Q02858
									Q8BH24
									Q922B6
									Q3U0M1
									Q0KL02
									Q61143
									Q2TV84
									Q61037
									Q8CGV9
									O08759
									Q80U95
									Q80WC1
									Q0KK59
									Q8R5H1
									Q8K387
									Q6A4J8
									P70398
									Q62468
									Q80TY5
									Q8BGX0
									Q6VNB8
									E9Q2M9
									Q91WL8
									Q6ZPZ3
									A2AKY4
									Q6P1E1
