# Supplementary material for: Dynamic proteomic and phosphoproteomic atlas of corticostriatal axons in neurodevelopment
Source: eLife. 2022 Oct 14;11:e78847. doi: 10.7554/eLife.78847 (PMC9629834; doi:10.7554/eLife.78847)
Supplement: Supplementary file 9. [file elife-78847-supp9.xlsx]

## Sheet: webgestal_disease
cluster	geneSet	symbol	link	size	overlap	expect	enrichmentRatio	pValue	FDR	overlapId	userId
1	Developmental Delay	DD	Developmental Delay	31	5	2.74684	1.82028	0.124278	0.854457	107975;14677;13628;13424;51792	B2RSH2;P62631;Q76MZ3;Q8K212;Q9JHU4
1	SczGenes	Scz	SczGenes	92	9	8.1519	1.10404	0.430125	0.854457	70369;26554;11775;234267;218236;108069;19229;15369;54401	O70252;P35802;Q6A0A9;Q8CI32;Q9CQV8;Q9JLV5;Q9JME5;Q9QVP9;Q9QYS2
1	Major Depressive Disorder	MDD	Major Depressive Disorder	17	2	1.50633	1.32773	0.456173	0.854457	70369;104001	Q8CI32;Q8K0T0
1	Multiple Sclerosis	MS	Multiple Sclerosis	22	2	1.94937	1.02597	0.601387	0.854457	13859;19155	Q11011;Q60902
1	BipolarGenes	BP	BipolarGenes	34	3	3.01266	0.995798	0.60249	0.854457	107975;64009;239857	Q6ZWR6;Q8BLQ9;Q8K212
1	ASDgenes	ASD	ASDgenes	154	13	13.6456	0.95269	0.674227	0.854457	107975;14677;13424;26554;18191;50884;76884;11775;22631;23859;77579;57138;14479	B2RSH2;P28660;P63101;Q5SQX6;Q61879;Q6P9K9;Q8K212;Q8R5H1;Q91V14;Q91XM9;Q9JHU4;Q9JLV5;Q9JME5
1	Epilepsy	EP	Epilepsy	14	1	1.24051	0.806122	0.734942	0.854457	13628	P62631
1	Parkinsons	PD	Parkinsons	15	1	1.32911	0.752381	0.759517	0.854457	53416	Q9Z1W9
2	ASDgenes	ASD	ASDgenes	154	17	10.7215	1.5856	0.00471337	0.0424203	19211;109676;216965;11785;217124;231713;30957;56457;213988;229663;77097;12294;217866;12554;67703;243548;75409	A2A690;O08586;Q5F2E8;Q6R891;Q7TT50;Q80Y24;Q810B7;Q8BKI2;Q8BR86;Q8BWZ3;Q8C8R3;Q8VBZ3;Q91W50;Q9ESN9;Q9QXJ1;Q9WTR5;Q9Z1L5
2	Multiple Sclerosis	MS	Multiple Sclerosis	22	2	1.53165	1.30579	0.464793	1	66922;22031	P62071;Q60803
2	Parkinsons	PD	Parkinsons	15	1	1.0443	0.957576	0.669821	1	72160	Q8C996
2	Developmental Delay	DD	Developmental Delay	31	1	2.15823	0.463343	0.905116	1	19211	O08586
2	SczGenes	Scz	SczGenes	92	3	6.40506	0.468379	0.978358	1	229663;71750;17169	Q03141;Q80TM6;Q91W50
3	BipolarGenes	BP	BipolarGenes	34	18	6.88608	2.61397	6.35608e-06	5.72047e-05	56473;56702;20112;58208;170930;319159;97122;319160;69386;100041230;319161;319157;319156;319155;326620;326619;319158;320332	P43276;P61957;P62806;P62806;P62806;P62806;P62806;P62806;P62806;P62806;P62806;P62806;P62806;P62806;P62806;Q99PV8;Q9WUT3;Q9Z0R9
3	Multiple Sclerosis	MS	Multiple Sclerosis	22	6	4.4557	1.34659	0.272506	0.973294	13209;56422;228869;102693;56459;20586	P54823;Q3TKT4;Q69ZS7;Q6PDH0;Q91W39;Q9R1T2
3	ASDgenes	ASD	ASDgenes	154	31	31.1899	0.993912	0.576266	0.973294	11538;51810;12995;13176;102693;56459;20586;68693;16561;56403;27373;14897;20624;19182;11991;14007;53356;320632;101943;229707;11461;12464;234852;234594;13360;15571;77766;227331;66660;224105;20658	G5E870;O08810;O88455;O88685;P60710;P70211;P80315;Q00PI9;Q3TKT4;Q60575;Q60668;Q60737;Q60900;Q6P4T2;Q6PDH0;Q6Y7W8;Q6ZQ08;Q7TMK9;Q8C079;Q8CH25;Q8CIN4;Q8VEK3;Q921M3;Q921W0;Q9ER73;Q9JMK2;Q9QX47;Q9R1T2;Q9Z0H4;Q9Z103;Q9Z1D1
3	Alzheimer<d5>s Disease	AD	Alzheimer<d5>s Disease	8	1	1.62025	0.617188	0.840134	0.973294	218952	Q8CIB5
3	Major Depressive Disorder	MDD	Major Depressive Disorder	17	2	3.44304	0.580882	0.893172	0.973294	13176;56473	P70211;Q9Z0R9
3	Developmental Delay	DD	Developmental Delay	31	4	6.27848	0.637097	0.910551	0.973294	11538;229542;51810;12995	Q60737;Q8VEK3;Q8VHR5;Q9Z103
3	Epilepsy	EP	Epilepsy	14	1	2.83544	0.352679	0.960991	0.973294	51810	Q8VEK3
3	Parkinsons	PD	Parkinsons	15	1	3.03797	0.329167	0.969258	0.973294	347722	Q8BXK8
3	SczGenes	Scz	SczGenes	92	13	18.6329	0.69769	0.973294	0.973294	229542;13176;58208;234594;26441;225362;217869;270106;56463;241308;56195;12301;67824	A2AR50;P47963;P59325;P70211;Q6ZQ08;Q78PY7;Q8K2T1;Q8VCD6;Q8VHR5;Q91Z31;Q99PV8;Q9CXW3;Q9R1P0
4	Alzheimer<d5>s Disease	AD	Alzheimer<d5>s Disease	8	3	1.26582	2.37	0.11687	0.80843	76551;233489;54189	D3YZP9;O35551;Q7M6Y3
4	ASDgenes	ASD	ASDgenes	154	25	24.3671	1.02597	0.483316	0.80843	12387;223435;19268;210274;50850;18844;12934;12386;22222;53872;69077;16443;64451;104112;23806;237868;212139;74053;110611;26422;18190;279653;243743;243961;100763	A2A8L5;D3YZU1;E9Q7X7;O08553;O70481;P70206;Q02248;Q0KL02;Q60865;Q61301;Q6PDS3;Q80TF3;Q80U95;Q80UG2;Q80Z38;Q8BG32;Q8BWT5;Q8K1A6;Q8VDJ3;Q91V92;Q925T6;Q9EPN1;Q9QYY8;Q9Z0R4;Q9Z1K5
4	Major Depressive Disorder	MDD	Major Depressive Disorder	17	3	2.68987	1.11529	0.522478	0.80843	12388;108071;19672	P30999;Q05186;Q3UVX5
4	Developmental Delay	DD	Developmental Delay	31	5	4.90506	1.01935	0.564311	0.80843	12387;73945;13627;67959;223435	B2RRE7;P10126;Q02248;Q0KL02;Q3UEB3
4	SczGenes	Scz	SczGenes	92	14	14.557	0.961739	0.634506	0.80843	67959;19268;12388;26417;17762;54722;23797;54130;102278;22152;234593;333605;29809;545389	A2A8L5;A2AFR3;A6H6A9;P10637;P30999;P61164;Q0VE82;Q3UEB3;Q63844;Q6A065;Q8BTG7;Q9ERD7;Q9WUA6;Q9Z2D3
4	BipolarGenes	BP	BipolarGenes	34	5	5.37975	0.929412	0.654894	0.80843	99138;68519;72205;54722;210274	Q05BC3;Q7TNG5;Q80Z38;Q8R1R3;Q9Z2D3
4	Epilepsy	EP	Epilepsy	14	2	2.21519	0.902857	0.680531	0.80843	73945;13627	B2RRE7;P10126
4	Parkinsons	PD	Parkinsons	15	2	2.37342	0.842667	0.718605	0.80843	17762;105689	P10637;Q7TPH6
4	Multiple Sclerosis	MS	Multiple Sclerosis	22	2	3.48101	0.574545	0.892595	0.892595	14784;26417	Q60631;Q63844
5	Epilepsy	EP	Epilepsy	14	8	4.03165	1.9843	0.022039	0.198351	240057;20910;19290;232333;14681;382253;13429;20614	F6SEU4;O08599;P18872;P31648;P39053;P42669;P60879;Q3UTQ8
5	Parkinsons	PD	Parkinsons	15	7	4.31962	1.62051	0.104145	0.468652	11975;14924;108058;110524;64652;20404;20617	O55042;Q62420;Q6P5E8;Q6PHZ2;Q6RHR9;Q80TM9;Q9Z1G4
5	Developmental Delay	DD	Developmental Delay	31	10	8.92722	1.12017	0.396917	0.776707	240057;20910;19290;232333;14681;382253;13429;245684;16438;109880	F6SEU4;O08599;P11881;P18872;P28028;P31648;P39053;P42669;Q3UTQ8;Q80YA9
5	Multiple Sclerosis	MS	Multiple Sclerosis	22	7	6.33544	1.1049	0.456126	0.776707	76960;12325;74374;26413;18577;19679;54683	O89084;P63085;P99029;Q6ZPQ6;Q80U30;Q80YN3;Q923T9
5	ASDgenes	ASD	ASDgenes	154	45	44.3481	1.0147	0.484772	0.776707	240057;20910;232333;382253;245684;109880;360013;74374;18751;11735;58234;13385;18015;11941;232910;75770;14394;268932;242425;20979;12322;74256;11776;330914;216439;211914;12286;12801;30785;268566;14799;329152;15461;15893;17754;56717;17918;170711;18795;19060;77980;78808;20964;76510;72145	B9EJA2;F6SEU4;G5E8K5;O08599;O54774;O88935;P11798;P23818;P28028;P31648;P46096;P47746;P62743;P62812;P68404;P97411;P97445;Q04690;Q3U0M1;Q3UHD9;Q3UTQ8;Q4ACU6;Q60676;Q61411;Q62108;Q69Z98;Q6I6G8;Q6P9K8;Q6VNB8;Q6ZPE2;Q7SIG6;Q80T41;Q80TQ2;Q80U30;Q80YA9;Q811P8;Q8BUV3;Q8K400;Q8R554;Q99104;Q9JLN9;Q9JMH9;Q9QYR6;Q9R0K7;Q9Z1B3
5	Major Depressive Disorder	MDD	Major Depressive Disorder	17	5	4.89557	1.02133	0.57229	0.776707	227801;360013;26875;80718;228136	Q8K382;Q8VDZ4;Q99P58;Q9JMH9;Q9QYX7
5	SczGenes	Scz	SczGenes	92	26	26.4937	0.981366	0.604106	0.776707	245684;228136;20617;58234;242425;11776;14799;74103;13855;11938;269615;94282;15165;229541;21981;27364;64011;50779;18195;216613;268980;13446;72238;216831;66626;245886	A2AP18;O54774;O55042;O55106;O55143;O88704;P23818;P46460;P60761;Q3U1Y4;Q3UMR0;Q4ACU6;Q5SP85;Q5SSM3;Q62415;Q7TNF0;Q80T41;Q80XQ2;Q80YA9;Q8CHU3;Q8VDZ4;Q925N0;Q9DB75;Q9DC07;Q9QZX7;Q9Z2H2
5	Alzheimer<d5>s Disease	AD	Alzheimer<d5>s Disease	8	1	2.3038	0.434066	0.936306	0.962487	30948	O08539
5	BipolarGenes	BP	BipolarGenes	34	6	9.79114	0.612799	0.962487	0.962487	27360;18810;23970;18751;53761;11735	G5E8K5;P68404;Q7TSC1;Q9QXS1;Q9QYB5;Q9WVE8
6	Alzheimer<d5>s Disease	AD	Alzheimer<d5>s Disease	8	3	0.683544	4.38889	0.023408	0.210672	110842;110826;66841	Q921G7;Q99LC5;Q9DCW4
6	Major Depressive Disorder	MDD	Major Depressive Disorder	17	3	1.45253	2.06536	0.168439	0.597432	12709;78920;14194	P97807;Q04447;Q9D2G2
6	SczGenes	Scz	SczGenes	92	10	7.86076	1.27214	0.230328	0.597432	12709;66904;320840;230935;104418;228359;67184;15510;224860;17991	P63038;Q04447;Q5FWK3;Q5U458;Q80UP3;Q80Z24;Q8K394;Q99MN9;Q9CQ75;Q9ERS2
6	Developmental Delay	DD	Developmental Delay	31	4	2.64873	1.51016	0.265525	0.597432	17257;13000;18597;19247	O54833;P35235;P35486;Q9Z2D6
6	Epilepsy	EP	Epilepsy	14	2	1.1962	1.67196	0.339954	0.611916	17257;14401	P63137;Q9Z2D6
6	Multiple Sclerosis	MS	Multiple Sclerosis	22	1	1.87975	0.531987	0.869537	1	66530	Q99PL6
6	ASDgenes	ASD	ASDgenes	154	10	13.1582	0.759981	0.930419	1	17257;19247;14401;110826;12721;214579;17886;66904;18673;69178	O89053;P35235;P63137;P67778;Q8BWF0;Q8VDD5;Q99MN9;Q9D8U8;Q9DCW4;Q9Z2D6
6	BipolarGenes	BP	BipolarGenes	34	1	2.90506	0.344227	0.959884	1	16423	Q61735
7	SczGenes	Scz	SczGenes	92	5	2.91139	1.71739	0.131886	1	67006;15526;15528;56524;56550	P38647;P62838;Q64433;Q9CQB5;Q9JLB0
7	Multiple Sclerosis	MS	Multiple Sclerosis	22	1	0.696203	1.43636	0.519298	1	236539	Q61753
7	Developmental Delay	DD	Developmental Delay	31	1	0.981013	1.01935	0.649486	1	107932	Q6PDQ2
7	ASDgenes	ASD	ASDgenes	154	3	4.87342	0.615584	0.938852	1	73139;239528;59021	P53994;Q8CJG0;Q9CXS4
8	SczGenes	Scz	SczGenes	92	7	3.78481	1.8495	0.0499902	0.449912	22627;103573;381921;225363;223649;11844;20336	O35382;P62259;P84084;Q6P5F9;Q6ZQ29;Q8BWY3;Q91V36
8	Parkinsons	PD	Parkinsons	15	1	0.617089	1.62051	0.475263	1	22003	P58771
8	Multiple Sclerosis	MS	Multiple Sclerosis	22	1	0.905063	1.1049	0.615997	1	66469	Q9DB60
8	ASDgenes	ASD	ASDgenes	154	6	6.33544	0.947053	0.680512	1	12361;18189;208727;103573;381921;22215	O08759;O70589;Q6NZM9;Q6P5F9;Q6ZQ29;Q9CS84
8	Developmental Delay	DD	Developmental Delay	31	1	1.27532	0.784119	0.74587	1	12361	O70589
8	BipolarGenes	BP	BipolarGenes	34	1	1.39873	0.714932	0.779195	1	22627	P62259

## Sheet: webgestal_reactome
cluster	geneSet	description	link	size	overlap	expect	enrichmentRatio	pValue	FDR	overlapId	userId
1	R-MMU-425393	Transport of inorganic cations/anions and amino acids/oligopeptides	http://reactome.org/PathwayBrowser/#/R-MMU-425393	17	6	1.48934	4.02862	0.00219494	0.76048	110891;20512;20536;22348;57138;76257	O35633;P16283;P56564;Q8K596;Q91V14;Q9DCP2
1	R-MMU-425407	SLC-mediated transmembrane transport	http://reactome.org/PathwayBrowser/#/R-MMU-425407	24	7	2.1026	3.3292	0.00323547	0.76048	110891;20501;20512;20536;22348;57138;76257	O35633;P16283;P53986;P56564;Q8K596;Q91V14;Q9DCP2
1	R-MMU-180024	DARPP-32 events	http://reactome.org/PathwayBrowser/#/R-MMU-180024	13	5	1.13891	4.39016	0.00343074	0.76048	12568;18749;19084;19085;51792	P12849;P49615;P68181;Q76MZ3;Q9DBC7
1	R-MMU-2029480	Fcgamma receptor (FCGR) dependent phagocytosis	http://reactome.org/PathwayBrowser/#/R-MMU-2029480	36	8	3.15391	2.53654	0.0101398	1	12540;14083;15519;18754;18807;50884;76884;83767	O35405;P07901;P16054;P28660;P34152;P60766;Q5SQX6;Q8R5H6
1	R-MMU-182971	EGFR downregulation	http://reactome.org/PathwayBrowser/#/R-MMU-182971	11	4	0.963694	4.1507	0.0113584	1	12402;12540;13859;20844	P22682;P60766;P70297;Q60902
1	R-MMU-109582	Hemostasis	http://reactome.org/PathwayBrowser/#/R-MMU-109582	128	19	11.2139	1.69433	0.0115926	1	109689;110891;11932;12345;12540;14083;14677;18749;18754;19084;19085;20501;20719;22151;22631;381290;51792;66082;76192	B2RSH2;P12849;P14231;P16054;P34152;P47757;P53986;P60766;P63101;P68181;Q60854;Q6Q477;Q76MZ3;Q7TMM9;Q8BWG8;Q8K596;Q8R2Y0;Q99LR1;Q9DBC7
1	R-MMU-114508	Effects of PIP2 hydrolysis	http://reactome.org/PathwayBrowser/#/R-MMU-114508	7	3	0.61326	4.89189	0.017643	1	18754;66082;76192	P16054;Q8R2Y0;Q99LR1
1	R-MMU-111447	Activation of BAD and translocation to mitochondria	http://reactome.org/PathwayBrowser/#/R-MMU-111447	7	3	0.61326	4.89189	0.017643	1	19058;22631;54401	P63101;Q63810;Q9CQV8
1	R-MMU-112043	PLC beta mediated events	http://reactome.org/PathwayBrowser/#/R-MMU-112043	20	5	1.75217	2.8536	0.0251134	1	14677;14687;18749;19084;19085	B2RSH2;O70443;P12849;P68181;Q9DBC7
1	R-MMU-418594	G alpha (i) signalling events	http://reactome.org/PathwayBrowser/#/R-MMU-418594	50	9	4.38043	2.05459	0.0255574	1	108069;12568;14677;14687;14823;18749;19084;19085;51792	B2RSH2;O70443;P12849;P47743;P49615;P68181;Q76MZ3;Q9DBC7;Q9QYS2
2	R-MMU-425561	Sodium/Calcium exchangers	http://reactome.org/PathwayBrowser/#/R-MMU-425561	5	4	0.157853	25.34	4.17844e-06	0.0018171	109552;12313;12314;12315	P0DP27;P0DP27;P0DP27;Q6P069
2	R-MMU-2672351	Stimuli-sensing channels	http://reactome.org/PathwayBrowser/#/R-MMU-2672351	10	5	0.315706	15.8375	5.46496e-06	0.0018171	109552;12313;12314;12315;78339	P0DP27;P0DP27;P0DP27;Q6P069;Q6P5F7
2	R-MMU-2025928	Calcineurin activates NFAT	http://reactome.org/PathwayBrowser/#/R-MMU-2025928	6	4	0.189424	21.1167	1.22496e-05	0.00203649	12313;12314;12315;19056	P0DP27;P0DP27;P0DP27;P48453
2	R-MMU-5607763	CLEC7A (Dectin-1) induces NFAT activation	http://reactome.org/PathwayBrowser/#/R-MMU-5607763	6	4	0.189424	21.1167	1.22496e-05	0.00203649	12313;12314;12315;19056	P0DP27;P0DP27;P0DP27;P48453
2	R-MMU-8876725	Protein methylation	http://reactome.org/PathwayBrowser/#/R-MMU-8876725	8	4	0.252565	15.8375	5.45894e-05	0.00726039	12313;12314;12315;269523	P0DP27;P0DP27;P0DP27;Q01853
2	R-MMU-1855204	Synthesis of IP3 and IP4 in the cytosol	http://reactome.org/PathwayBrowser/#/R-MMU-1855204	9	4	0.284136	14.0778	9.60232e-05	0.00798193	12313;12314;12315;19211	O08586;P0DP27;P0DP27;P0DP27
2	R-MMU-418359	Reduction of cytosolic Ca++ levels	http://reactome.org/PathwayBrowser/#/R-MMU-418359	9	4	0.284136	14.0778	9.60232e-05	0.00798193	109552;12313;12314;12315	P0DP27;P0DP27;P0DP27;Q6P069
2	R-MMU-2871809	FCERI mediated Ca+2 mobilization	http://reactome.org/PathwayBrowser/#/R-MMU-2871809	9	4	0.284136	14.0778	9.60232e-05	0.00798193	12313;12314;12315;19056	P0DP27;P0DP27;P0DP27;P48453
2	R-MMU-111931	PKA-mediated phosphorylation of CREB	http://reactome.org/PathwayBrowser/#/R-MMU-111931	10	4	0.315706	12.67	0.000156395	0.00945481	12313;12314;12315;432530	O88444;P0DP27;P0DP27;P0DP27
2	R-MMU-163615	PKA activation	http://reactome.org/PathwayBrowser/#/R-MMU-163615	10	4	0.315706	12.67	0.000156395	0.00945481	12313;12314;12315;432530	O88444;P0DP27;P0DP27;P0DP27
3	R-MMU-8953854	Metabolism of RNA	http://reactome.org/PathwayBrowser/#/R-MMU-8953854	110	86	24.7435	3.47566	0	0	100862468;101943;107686;108989;11737;11991;13204;13209;14113;15381;15387;15388;16549;16898;17975;19166;19167;19170;19172;19173;19175;19177;19179;19182;19184;19185;192159;19386;19704;20044;20084;20091;20115;20383;20384;20462;20624;20637;20826;22123;229279;232989;233908;234594;23983;26440;26441;26442;26443;26444;26446;267019;27050;27207;27370;27373;320632;51810;53379;53607;53817;54127;54563;55989;5…	F6ZDS4;O08810;O09061;O35226;O35286;O35326;O35381;O55234;O70435;O88569;O88685;P09405;P14685;P25444;P35550;P49722;P54823;P56959;P60335;P61979;P62082;P62192;P62196;P62245;P62264;P62267;P62270;P62281;P62301;P62317;P62334;P62855;P62858;P62908;P62996;P70195;P84104;P97351;P99026;Q3TWW8;Q3U0V1;Q60668;Q60692;Q62189;Q62376;Q69ZS7;Q6DFW4;Q6P4T2;Q6PE01;Q6ZQ08;Q6ZWN5;Q810A7;Q8BG05;Q8BJ71;Q8BTI8;Q8CH18;Q8JZX4;…
3	R-MMU-8878171	Transcriptional regulation by RUNX1	http://reactome.org/PathwayBrowser/#/R-MMU-8878171	49	38	11.0221	3.44762	0	0	100041230;12995;15078;15081;19166;19167;19170;19172;19173;19175;19177;19179;19182;19184;19185;20586;22123;26440;26441;26442;26443;26444;26446;319155;319156;319157;319158;319159;319160;319161;320332;326619;326620;66413;67089;69386;77605;97122	O09061;O35226;O55234;O70435;O88685;P14685;P49722;P62192;P62196;P62334;P62806;P62806;P62806;P62806;P62806;P62806;P62806;P62806;P62806;P62806;P62806;P62806;P62806;P70195;P84244;P84244;P99026;Q3THW5;Q3TKT4;Q60692;Q60737;Q99JI4;Q9QUM9;Q9R1P0;Q9R1P1;Q9R1P4;Q9Z2U0;Q9Z2U1
3	R-MMU-72203	Processing of Capped Intron-Containing Pre-mRNA	http://reactome.org/PathwayBrowser/#/R-MMU-72203	45	41	10.1223	4.05045	0	0	100862468;101943;107686;108989;11991;13204;15381;15387;15388;192159;19386;20383;20384;20462;20624;20637;20826;229279;232989;233908;23983;320632;51810;53379;53607;53817;54563;56194;66585;67465;67500;67996;68816;68879;71805;72047;75956;76936;76938;77134;83701	F6ZDS4;O08810;O35286;O35326;O88569;P56959;P60335;P61979;P62317;P62996;P84104;Q3TWW8;Q60668;Q62189;Q62376;Q6P4T2;Q6PE01;Q810A7;Q8BG05;Q8BJ71;Q8BTI8;Q8CH18;Q8JZX4;Q8K4Z5;Q8R081;Q8VDM6;Q8VEK3;Q91YR7;Q921M3;Q99MR6;Q99PV0;Q9CX86;Q9D0E1;Q9D0T1;Q9D0T1;Q9D0W5;Q9ERU9;Q9QY81;Q9R1C7;Q9Z1N5;Q9Z204
3	R-MMU-72163	mRNA Splicing - Major Pathway	http://reactome.org/PathwayBrowser/#/R-MMU-72163	38	36	8.54775	4.21163	0	0	100862468;101943;107686;11991;13204;15381;15387;15388;192159;20383;20384;20462;20624;20637;20826;229279;232989;233908;23983;320632;51810;53379;53607;56194;66585;67465;67500;67996;68816;68879;72047;75956;76936;76938;77134;83701	O08810;O35286;O35326;O88569;P56959;P60335;P61979;P62317;P62996;P84104;Q3TWW8;Q60668;Q62189;Q62376;Q6P4T2;Q6PE01;Q810A7;Q8BG05;Q8BTI8;Q8CH18;Q8JZX4;Q8K4Z5;Q8R081;Q8VDM6;Q8VEK3;Q91YR7;Q921M3;Q99MR6;Q99PV0;Q9CX86;Q9D0E1;Q9D0T1;Q9D0T1;Q9D0W5;Q9R1C7;Q9Z204
3	R-MMU-72172	mRNA Splicing	http://reactome.org/PathwayBrowser/#/R-MMU-72172	38	36	8.54775	4.21163	0	0	100862468;101943;107686;11991;13204;15381;15387;15388;192159;20383;20384;20462;20624;20637;20826;229279;232989;233908;23983;320632;51810;53379;53607;56194;66585;67465;67500;67996;68816;68879;72047;75956;76936;76938;77134;83701	O08810;O35286;O35326;O88569;P56959;P60335;P61979;P62317;P62996;P84104;Q3TWW8;Q60668;Q62189;Q62376;Q6P4T2;Q6PE01;Q810A7;Q8BG05;Q8BTI8;Q8CH18;Q8JZX4;Q8K4Z5;Q8R081;Q8VDM6;Q8VEK3;Q91YR7;Q921M3;Q99MR6;Q99PV0;Q9CX86;Q9D0E1;Q9D0T1;Q9D0T1;Q9D0W5;Q9R1C7;Q9Z204
3	R-MMU-2990846	SUMOylation	http://reactome.org/PathwayBrowser/#/R-MMU-2990846	36	31	8.09787	3.82817	2.22045e-16	2.46099e-14	100041230;108989;116870;15204;15381;15387;170930;19386;21969;21974;22196;224903;27223;319155;319156;319157;319158;319159;319160;319161;320332;326619;326620;50995;54563;55989;56459;67040;69386;71805;97122	D3YXK2;F6ZDS4;P61957;P61979;P62806;P62806;P62806;P62806;P62806;P62806;P62806;P62806;P62806;P62806;P62806;P62806;P62806;P63280;P70399;Q04750;Q4U2R1;Q501J6;Q64511;Q6DFW4;Q8BJ71;Q8K4B0;Q9ERU9;Q9QY81;Q9R1T2;Q9Z1F9;Q9Z204
3	R-MMU-3108232	SUMO E3 ligases SUMOylate target proteins	http://reactome.org/PathwayBrowser/#/R-MMU-3108232	34	29	7.64799	3.79185	4.66294e-15	4.42979e-13	100041230;108989;116870;15204;15381;15387;170930;19386;21969;21974;22196;224903;27223;319155;319156;319157;319158;319159;319160;319161;320332;326619;326620;54563;55989;67040;69386;71805;97122	D3YXK2;F6ZDS4;P61957;P61979;P62806;P62806;P62806;P62806;P62806;P62806;P62806;P62806;P62806;P62806;P62806;P62806;P62806;P63280;P70399;Q04750;Q4U2R1;Q501J6;Q64511;Q6DFW4;Q8BJ71;Q8K4B0;Q9ERU9;Q9QY81;Q9Z204
3	R-MMU-6791226	Major pathway of rRNA processing in the nucleolus and cytosol	http://reactome.org/PathwayBrowser/#/R-MMU-6791226	21	21	4.72376	4.44561	1.37668e-14	9.1549e-13	100862468;14113;16898;17975;20044;20084;20091;20115;20826;267019;27050;27207;27370;27373;54127;55989;66475;66481;67134;68052;76846	P09405;P25444;P35550;P62082;P62245;P62264;P62267;P62270;P62281;P62301;P62855;P62858;P62908;P97351;Q6DFW4;Q6ZWN5;Q9CQR2;Q9D0T1;Q9D0T1;Q9D6Z1;Q9JMK2
3	R-MMU-72312	rRNA processing	http://reactome.org/PathwayBrowser/#/R-MMU-72312	21	21	4.72376	4.44561	1.37668e-14	9.1549e-13	100862468;14113;16898;17975;20044;20084;20091;20115;20826;267019;27050;27207;27370;27373;54127;55989;66475;66481;67134;68052;76846	P09405;P25444;P35550;P62082;P62245;P62264;P62267;P62270;P62281;P62301;P62855;P62858;P62908;P97351;Q6DFW4;Q6ZWN5;Q9CQR2;Q9D0T1;Q9D0T1;Q9D6Z1;Q9JMK2
3	R-MMU-8868773	rRNA processing in the nucleus and cytosol	http://reactome.org/PathwayBrowser/#/R-MMU-8868773	21	21	4.72376	4.44561	1.37668e-14	9.1549e-13	100862468;14113;16898;17975;20044;20084;20091;20115;20826;267019;27050;27207;27370;27373;54127;55989;66475;66481;67134;68052;76846	P09405;P25444;P35550;P62082;P62245;P62264;P62267;P62270;P62281;P62301;P62855;P62858;P62908;P97351;Q6DFW4;Q6ZWN5;Q9CQR2;Q9D0T1;Q9D0T1;Q9D6Z1;Q9JMK2
4	R-MMU-399956	CRMPs in Sema3A signaling	http://reactome.org/PathwayBrowser/#/R-MMU-399956	9	8	1.31413	6.08769	1.42694e-06	0.000948918	12933;12934;14360;18844;22240;243743;56637;65254	O08553;P39688;P70206;P97427;Q62188;Q80UG2;Q9EQF6;Q9WV60
4	R-MMU-1266738	Developmental Biology	http://reactome.org/PathwayBrowser/#/R-MMU-1266738	113	32	16.4996	1.93944	5.44623e-05	0.0181087	12386;12387;12933;12934;13800;14026;14360;14432;14783;14784;16443;18844;20418;20779;22142;22152;22240;223435;230126;232906;23797;243743;26417;384783;54126;545156;56637;65254;69632;71529;73710;74117	A2CG49;O08553;P05480;P06837;P39688;P68369;P70206;P70429;P81122;P97427;Q02248;Q03173;Q0KL02;Q60631;Q60760;Q61120;Q61301;Q62188;Q63844;Q69ZS8;Q6PD21;Q80UG2;Q8R4H2;Q91YM2;Q99JY9;Q9CWF2;Q9EQF6;Q9ERD7;Q9ES28;Q9WUA6;Q9WV60;Q9Z0R4
4	R-MMU-422475	Axon guidance	http://reactome.org/PathwayBrowser/#/R-MMU-422475	96	28	14.0174	1.99752	9.62305e-05	0.0213311	12933;12934;13800;14026;14360;14432;14783;14784;16443;18844;20418;20779;22142;22152;22240;223435;230126;232906;243743;26417;384783;54126;545156;56637;65254;69632;73710;74117	A2CG49;O08553;P05480;P06837;P39688;P68369;P70206;P70429;P81122;P97427;Q03173;Q0KL02;Q60631;Q60760;Q61120;Q62188;Q63844;Q6PD21;Q80UG2;Q8R4H2;Q91YM2;Q99JY9;Q9CWF2;Q9EQF6;Q9ERD7;Q9ES28;Q9WV60;Q9Z0R4
4	R-MMU-1169408	ISG15 antiviral mechanism	http://reactome.org/PathwayBrowser/#/R-MMU-1169408	6	5	0.876085	5.70721	0.000334916	0.0556798	17999;19043;208643;23806;26417	P36993;P46935;Q63844;Q6NZJ6;Q9Z1K5
4	R-MMU-373755	Semaphorin interactions	http://reactome.org/PathwayBrowser/#/R-MMU-373755	22	10	3.21231	3.11302	0.000456878	0.0607647	12933;12934;14360;18844;22240;232906;243743;56637;65254;69632	O08553;P39688;P70206;P97427;Q62188;Q80UG2;Q8R4H2;Q91YM2;Q9EQF6;Q9WV60
4	R-MMU-1169410	Antiviral mechanism by IFN-stimulated genes	http://reactome.org/PathwayBrowser/#/R-MMU-1169410	7	5	1.0221	4.89189	0.00103332	0.105686	17999;19043;208643;23806;26417	P36993;P46935;Q63844;Q6NZJ6;Q9Z1K5
4	R-MMU-162582	Signal Transduction	http://reactome.org/PathwayBrowser/#/R-MMU-162582	386	74	56.3615	1.31295	0.00179799	0.105686	108071;108841;117600;12367;12387;12388;12927;12928;12929;12988;13589;14026;14158;14163;14270;14360;14569;14678;14679;14682;14783;14784;15469;16443;16563;16572;16573;16592;17999;18108;18221;18412;19088;19186;19395;20418;20779;208643;208846;20901;211652;21402;22142;22152;22258;223435;225849;230126;232906;23797;23997;26417;320795;329251;384783;54126;545156;56324;56424;56637;58996;59035;66290;66998;6…	A2APV2;A2CG49;O35685;O70311;O88811;P05480;P08752;P21279;P28740;P30999;P31324;P33175;P35123;P39688;P41241;P46935;P47941;P52734;P68369;P70268;P70429;P70451;P70677;P81122;P97371;Q02248;Q05816;Q0KL02;Q3TXS7;Q3UVX5;Q5SXA9;Q60631;Q60760;Q61120;Q61140;Q61166;Q61598;Q61768;Q63844;Q64010;Q64337;Q69ZH9;Q6IR34;Q6NZJ6;Q6PD21;Q6PD28;Q8BG32;Q8BG95;Q8BJY1;Q8BPM0;Q8C0D4;Q8CEE7;Q8K4P8;Q8R4H2;Q91YM2;Q91Z67;Q91Z69;…
4	R-MMU-194840	Rho GTPase cycle	http://reactome.org/PathwayBrowser/#/R-MMU-194840	34	12	4.96448	2.41717	0.00190491	0.105686	117600;14163;14270;14569;16443;223435;232906;54126;545156;58996;69632;75415	A2CG49;P52734;Q0KL02;Q61598;Q69ZH9;Q8C0D4;Q8R4H2;Q91YM2;Q91Z67;Q91Z69;Q9ES28;Q9Z0R4
4	R-MMU-191273	Cholesterol biosynthesis	http://reactome.org/PathwayBrowser/#/R-MMU-191273	5	4	0.730071	5.47892	0.00195682	0.105686	110196;110460;13121;16987	Q8BLN5;Q8CAY6;Q8K0C4;Q920E5
4	R-MMU-204998	Cell death signalling via NRAGE, NRIF and NADE	http://reactome.org/PathwayBrowser/#/R-MMU-204998	18	8	2.62826	3.04384	0.00210292	0.105686	12367;14163;16443;18412;223435;54126;545156;69632	A2CG49;P52734;P70677;Q0KL02;Q64337;Q8R4H2;Q9ES28;Q9Z0R4
5	R-MMU-112315	Transmission across Chemical Synapses	http://reactome.org/PathwayBrowser/#/R-MMU-112315	81	46	17.1334	2.68482	3.42948e-13	2.2806e-10	108058;109880;11472;11515;11771;11772;11773;12286;12287;12297;12322;12323;12325;13383;13385;14394;14645;14680;14697;14799;15461;18039;18195;18607;18751;18752;18795;19339;19417;20511;20614;20907;20910;20964;20979;21912;232333;232910;242425;26413;52589;53310;55984;71770;72961;76787	O08599;O35526;O55017;O88935;P08551;P11798;P15105;P17426;P17427;P23818;P27671;P28028;P28652;P31648;P43006;P46096;P46460;P51830;P54285;P60469;P60879;P62743;P62812;P62881;P63011;P63085;P63318;P68404;P70175;P84091;P97445;Q3TXX4;Q61411;Q62108;Q62283;Q6PHZ2;Q80T41;Q811D0;Q8CGK7;Q8VBY2;Q91X97;Q923T9;Q9DBG3;Q9JI91;Q9Z1B3;Q9Z2A0
5	R-MMU-112316	Neuronal System	http://reactome.org/PathwayBrowser/#/R-MMU-112316	104	53	21.9984	2.40926	1.59872e-12	5.31575e-10	108058;109880;11472;11515;11771;11772;11773;12286;12287;12297;12322;12323;12325;13383;13385;13822;13823;14394;14645;14680;14697;14799;15165;15461;16508;18039;18195;18607;18751;18752;18795;19339;19417;20168;20511;20614;20907;20910;20964;20979;21912;232333;232910;242425;242667;244310;26413;52589;53310;55984;71770;72961;76787	O08599;O35526;O55017;O70318;O88704;O88935;P08551;P11798;P15105;P17426;P17427;P23818;P27671;P28028;P28652;P31648;P43006;P46096;P46460;P51830;P54285;P60469;P60879;P62743;P62812;P62881;P63011;P63085;P63318;P68404;P70175;P84091;P97445;Q3TXX4;Q61411;Q62108;Q62283;Q6PFD5;Q6PHZ2;Q80T41;Q811D0;Q8BJ42;Q8CGK7;Q8VBY2;Q91X97;Q923T9;Q9DBG3;Q9ES97;Q9JI91;Q9WV92;Q9Z0V2;Q9Z1B3;Q9Z2A0
5	R-MMU-112314	Neurotransmitter receptors and postsynaptic signal transmission	http://reactome.org/PathwayBrowser/#/R-MMU-112314	51	32	10.7877	2.96634	5.37733e-11	1.19198e-08	108058;109880;11472;11515;11771;11772;11773;12322;12323;12325;13383;13385;14394;14680;14697;14799;15461;18039;18195;18607;18751;18752;18795;19417;21912;232910;242425;26413;52589;53310;55984;71770	P08551;P11798;P17426;P17427;P23818;P27671;P28028;P28652;P46460;P51830;P62743;P62812;P62881;P63085;P63318;P68404;P70175;P84091;Q61411;Q62108;Q62283;Q6PHZ2;Q80T41;Q811D0;Q8CGK7;Q8VBY2;Q91X97;Q923T9;Q9DBG3;Q9JI91;Q9Z1B3;Q9Z2A0
5	R-MMU-399719	Trafficking of AMPA receptors	http://reactome.org/PathwayBrowser/#/R-MMU-399719	18	16	3.80742	4.20232	1.12414e-09	1.4951e-07	108058;11771;11772;11773;12322;12323;12325;13383;13385;14799;18195;18751;18752;21912;232910;71770	P11798;P17426;P17427;P23818;P28652;P46460;P62743;P63318;P68404;P84091;Q62108;Q62283;Q6PHZ2;Q811D0;Q923T9;Q9DBG3
5	R-MMU-399721	Glutamate binding, activation of AMPA receptors and synaptic plasticity	http://reactome.org/PathwayBrowser/#/R-MMU-399721	18	16	3.80742	4.20232	1.12414e-09	1.4951e-07	108058;11771;11772;11773;12322;12323;12325;13383;13385;14799;18195;18751;18752;21912;232910;71770	P11798;P17426;P17427;P23818;P28652;P46460;P62743;P63318;P68404;P84091;Q62108;Q62283;Q6PHZ2;Q811D0;Q923T9;Q9DBG3
5	R-MMU-983712	Ion channel transport	http://reactome.org/PathwayBrowser/#/R-MMU-983712	39	23	8.24941	2.78808	1.85212e-07	2.05277e-05	108058;108664;11928;11931;11938;11941;11964;11966;11972;11975;11980;12322;12323;12325;20191;22368;232341;232975;65973;66335;67972;73834;98660	E9Q401;G5E829;O55143;P11798;P14094;P28652;P50516;P51863;P57746;P62814;P70704;P83741;Q6PHZ2;Q6PIC6;Q6PIE5;Q8BSY0;Q8BVE3;Q8VDN2;Q923T9;Q9R0K7;Q9WTR1;Q9Z1G3;Q9Z1G4
5	R-MMU-442755	Activation of NMDA receptors and postsynaptic events	http://reactome.org/PathwayBrowser/#/R-MMU-442755	22	16	4.65351	3.43826	2.3654e-07	2.24713e-05	108058;109880;11472;12322;12323;12325;13383;13385;14799;15461;18039;18607;19417;26413;53310;55984	P08551;P11798;P23818;P27671;P28028;P28652;P63085;P70175;Q61411;Q62108;Q6PHZ2;Q811D0;Q8VBY2;Q923T9;Q9JI91;Q9Z2A0
5	R-MMU-438064	Post NMDA receptor activation events	http://reactome.org/PathwayBrowser/#/R-MMU-438064	21	15	4.44199	3.37687	8.52543e-07	7.08676e-05	108058;109880;11472;12322;12323;12325;13383;13385;15461;18039;18607;19417;26413;53310;55984	P08551;P11798;P27671;P28028;P28652;P63085;P70175;Q61411;Q62108;Q6PHZ2;Q811D0;Q8VBY2;Q923T9;Q9JI91;Q9Z2A0
5	R-MMU-442742	CREB phosphorylation through the activation of Ras	http://reactome.org/PathwayBrowser/#/R-MMU-442742	19	14	4.01894	3.4835	1.1136e-06	8.22825e-05	108058;109880;11472;12322;12323;12325;13383;13385;15461;18039;18607;19417;26413;53310	P08551;P11798;P27671;P28028;P28652;P63085;P70175;Q61411;Q62108;Q6PHZ2;Q811D0;Q923T9;Q9JI91;Q9Z2A0
5	R-MMU-438066	Unblocking of NMDA receptors, glutamate binding and activation	http://reactome.org/PathwayBrowser/#/R-MMU-438066	11	10	2.32676	4.29783	1.40264e-06	8.47961e-05	108058;11472;12322;12323;12325;13383;13385;14799;18039;53310	P08551;P11798;P23818;P28652;P70175;Q62108;Q6PHZ2;Q811D0;Q923T9;Q9JI91
6	R-MMU-1430728	Metabolism	http://reactome.org/PathwayBrowser/#/R-MMU-1430728	348	112	49.165	2.27805	0	0	100041273;100042503;104130;107029;109731;109778;110391;110695;110826;110842;110948;11429;114664;11668;11671;11676;11677;11740;11946;11947;11949;11950;11958;12389;12709;12974;13000;13382;13806;13885;14194;14660;14661;14688;14693;14701;14704;14707;14751;14870;15929;17254;17448;17449;17991;17995;18041;18102;18293;18597;18641;18648;18655;18746;19139;20916;216134;225887;226646;227197;229211;230075;231…	D3Z7P3;O08749;O09111;O54833;P05063;P06745;P08249;P09411;P10852;P12382;P14152;P15532;P17182;P17182;P19157;P24549;P26443;P35486;P45376;P47740;P49817;P51881;P52480;P56382;P56480;P62874;P62880;P63216;P70404;P97807;Q03265;Q04447;Q06185;Q3THS6;Q3UIU2;Q60597;Q7TMF3;Q80SZ7;Q8BH59;Q8BKZ9;Q8BMS1;Q8BVI4;Q8BW75;Q8C5H8;Q8JZN5;Q8K183;Q8K2B3;Q8K3J1;Q8K4Z3;Q8R0F8;Q8R164;Q91VD9;Q91VR2;Q91W89;Q91WD5;Q91YD9;Q91YT0;…
6	R-MMU-1428517	The citric acid (TCA) cycle and respiratory electron transport	http://reactome.org/PathwayBrowser/#/R-MMU-1428517	65	56	9.18311	6.09815	0	0	100041273;100042503;104130;107029;110826;110842;11429;11946;11947;11949;11950;11958;12974;13382;14194;15929;17448;17991;17995;18293;18597;20916;225887;226646;227197;229211;230075;27402;56451;66043;66108;66218;66414;66416;66495;66841;66945;67126;67184;67264;67273;67680;67834;68194;68197;68202;68263;68342;68349;68375;68493;68636;71679;72900;75406;78920	O08749;O09111;P08249;P35486;P56382;P56480;P70404;P97807;Q03265;Q06185;Q3UIU2;Q60597;Q7TMF3;Q8BKZ9;Q8JZN5;Q8K2B3;Q8K3J1;Q8R0F8;Q91VD9;Q91VR2;Q91WD5;Q91YT0;Q921G7;Q99KE1;Q99KI0;Q99LC3;Q99LC5;Q9CPP6;Q9CQ54;Q9CQ75;Q9CQA3;Q9CQC7;Q9CQC7;Q9CQC7;Q9CQJ8;Q9CQQ7;Q9CQZ6;Q9CZU6;Q9D051;Q9D1H6;Q9D2G2;Q9D3D9;Q9D6J5;Q9D6J6;Q9D6R2;Q9DC69;Q9DC70;Q9DCJ5;Q9DCS9;Q9DCT2;Q9DCW4;Q9DCX2;Q9ERS2;Q9WUM5;Q9Z1P6;Q9Z2I9
6	R-MMU-163200	Respiratory electron transport, ATP synthesis by chemiosmotic coupling, and heat production by uncoupling proteins.	http://reactome.org/PathwayBrowser/#/R-MMU-163200	41	38	5.79242	6.56029	0	0	100041273;100042503;104130;110826;110842;11946;11947;11949;11950;11958;17991;17995;225887;226646;227197;229211;230075;66043;66108;66218;66414;66416;66495;66841;67126;67184;67264;67273;68194;68197;68202;68342;68349;68375;68493;71679;72900;75406	O09111;P56382;P56480;Q03265;Q06185;Q3UIU2;Q7TMF3;Q8JZN5;Q8K3J1;Q91VD9;Q91VR2;Q91WD5;Q91YT0;Q921G7;Q99LC3;Q99LC5;Q9CPP6;Q9CQ54;Q9CQ75;Q9CQC7;Q9CQC7;Q9CQC7;Q9CQJ8;Q9CQQ7;Q9CQZ6;Q9D1H6;Q9D3D9;Q9D6J5;Q9D6J6;Q9DC69;Q9DC70;Q9DCJ5;Q9DCS9;Q9DCT2;Q9DCW4;Q9DCX2;Q9ERS2;Q9Z1P6
6	R-MMU-611105	Respiratory electron transport	http://reactome.org/PathwayBrowser/#/R-MMU-611105	32	30	4.52092	6.63582	0	0	100041273;100042503;104130;110826;110842;17991;17995;225887;226646;227197;229211;230075;66108;66218;66414;66416;66495;66841;67184;67264;67273;68194;68197;68202;68342;68349;68375;68493;72900;75406	O09111;Q3UIU2;Q7TMF3;Q8JZN5;Q8K3J1;Q91VD9;Q91WD5;Q91YT0;Q921G7;Q99LC3;Q99LC5;Q9CPP6;Q9CQ54;Q9CQ75;Q9CQC7;Q9CQC7;Q9CQC7;Q9CQJ8;Q9CQZ6;Q9D1H6;Q9D6J5;Q9D6J6;Q9DC69;Q9DC70;Q9DCJ5;Q9DCS9;Q9DCT2;Q9DCW4;Q9ERS2;Q9Z1P6
6	R-MMU-6799198	Complex I biogenesis	http://reactome.org/PathwayBrowser/#/R-MMU-6799198	29	27	4.09708	6.59006	0	0	100041273;100042503;104130;17991;17995;225887;226646;227197;229211;230075;66108;66218;66414;66416;66495;67184;67264;67273;68194;68197;68202;68342;68349;68375;68493;72900;75406	O09111;Q3UIU2;Q7TMF3;Q8JZN5;Q8K3J1;Q91VD9;Q91WD5;Q91YT0;Q99LC3;Q9CPP6;Q9CQ54;Q9CQ75;Q9CQC7;Q9CQC7;Q9CQC7;Q9CQJ8;Q9CQZ6;Q9D1H6;Q9D6J5;Q9D6J6;Q9DC69;Q9DC70;Q9DCJ5;Q9DCS9;Q9DCT2;Q9ERS2;Q9Z1P6
6	R-MMU-71403	Citric acid cycle (TCA cycle)	http://reactome.org/PathwayBrowser/#/R-MMU-71403	16	15	2.26046	6.63582	1.48792e-12	1.64911e-10	107029;11429;12974;13382;14194;15929;17448;18293;20916;56451;66945;67680;67834;68636;78920	O08749;P08249;P70404;P97807;Q60597;Q8K2B3;Q8R0F8;Q99KE1;Q99KI0;Q9CQA3;Q9CZU6;Q9D2G2;Q9D6R2;Q9WUM5;Q9Z2I9
6	R-MMU-71406	Pyruvate metabolism and Citric Acid (TCA) cycle	http://reactome.org/PathwayBrowser/#/R-MMU-71406	24	18	3.39069	5.30866	1.44359e-11	1.37141e-09	107029;11429;12974;13382;14194;15929;17448;18293;18597;20916;27402;56451;66945;67680;67834;68263;68636;78920	O08749;P08249;P35486;P70404;P97807;Q60597;Q8BKZ9;Q8K2B3;Q8R0F8;Q99KE1;Q99KI0;Q9CQA3;Q9CZU6;Q9D051;Q9D2G2;Q9D6R2;Q9WUM5;Q9Z2I9
6	R-MMU-70263	Gluconeogenesis	http://reactome.org/PathwayBrowser/#/R-MMU-70263	13	10	1.83662	5.44478	4.91656e-07	4.08689e-05	11676;13806;14751;17448;17449;18648;18655;433182;67863;78830	P05063;P06745;P08249;P09411;P14152;P17182;P17182;Q8BH59;Q9CR62;Q9DBJ1
6	R-MMU-1592230	Mitochondrial biogenesis	http://reactome.org/PathwayBrowser/#/R-MMU-1592230	11	9	1.55406	5.79126	7.98109e-07	5.89714e-05	11946;11947;11949;11950;11958;14661;66043;67126;71679	P26443;P56382;P56480;Q03265;Q06185;Q91VR2;Q9CQQ7;Q9D3D9;Q9DCX2
6	R-MMU-163210	Formation of ATP by chemiosmotic coupling	http://reactome.org/PathwayBrowser/#/R-MMU-163210	9	8	1.27151	6.29174	1.09569e-06	6.62396e-05	11946;11947;11949;11950;11958;66043;67126;71679	P56382;P56480;Q03265;Q06185;Q91VR2;Q9CQQ7;Q9D3D9;Q9DCX2
7	R-MMU-5419276	Mitochondrial translation termination	http://reactome.org/PathwayBrowser/#/R-MMU-5419276	7	4	0.259669	15.4043	5.37751e-05	0.023192	118451;56282;66973;99045	Q80ZS3;Q924T2;Q99N84;Q9DB15
7	R-MMU-5368287	Mitochondrial translation	http://reactome.org/PathwayBrowser/#/R-MMU-5368287	8	4	0.296764	13.4787	0.000104625	0.023192	118451;56282;66973;99045	Q80ZS3;Q924T2;Q99N84;Q9DB15
7	R-MMU-5389840	Mitochondrial translation elongation	http://reactome.org/PathwayBrowser/#/R-MMU-5389840	8	4	0.296764	13.4787	0.000104625	0.023192	118451;56282;66973;99045	Q80ZS3;Q924T2;Q99N84;Q9DB15
7	R-MMU-6805567	Keratinization	http://reactome.org/PathwayBrowser/#/R-MMU-6805567	7	2	0.259669	7.70213	0.0251193	1	16480;77055	Q02257;Q3UV17
7	R-MMU-6809371	Formation of the cornified envelope	http://reactome.org/PathwayBrowser/#/R-MMU-6809371	7	2	0.259669	7.70213	0.0251193	1	16480;77055	Q02257;Q3UV17
7	R-MMU-8852135	Protein ubiquitination	http://reactome.org/PathwayBrowser/#/R-MMU-8852135	7	2	0.259669	7.70213	0.0251193	1	56550;70620	P62838;Q9D2M8
7	R-MMU-2559584	Formation of Senescence-Associated Heterochromatin Foci (SAHF)	http://reactome.org/PathwayBrowser/#/R-MMU-2559584	7	2	0.259669	7.70213	0.0251193	1	14958;50708	P10922;P15864
7	R-MMU-140342	Apoptosis induced DNA fragmentation	http://reactome.org/PathwayBrowser/#/R-MMU-140342	8	2	0.296764	6.73936	0.032708	1	14958;50708	P10922;P15864
7	R-MMU-211227	Activation of DNA fragmentation factor	http://reactome.org/PathwayBrowser/#/R-MMU-211227	8	2	0.296764	6.73936	0.032708	1	14958;50708	P10922;P15864
7	R-MMU-109581	Apoptosis	http://reactome.org/PathwayBrowser/#/R-MMU-109581	36	4	1.33544	2.99527	0.0409803	1	14958;16905;18107;50708	O70310;P10922;P15864;P48678
8	R-MMU-390522	Striated Muscle Contraction	http://reactome.org/PathwayBrowser/#/R-MMU-390522	5	3	0.173639	17.2773	0.000372811	0.140269	11459;22003;50876	P58771;P68134;Q9JKK7
8	R-MMU-5628897	TP53 Regulates Metabolic Genes	http://reactome.org/PathwayBrowser/#/R-MMU-5628897	20	5	0.694554	7.19886	0.000421862	0.140269	19744;22166;22627;22629;22630	P10639;P62259;P68254;P68510;Q921J2
8	R-MMU-75035	Chk1/Chk2(Cds1) mediated inactivation of Cyclin B:Cdk1 complex	http://reactome.org/PathwayBrowser/#/R-MMU-75035	6	3	0.208366	14.3977	0.000727521	0.161267	22627;22629;22630	P62259;P68254;P68510
8	R-MMU-111447	Activation of BAD and translocation to mitochondria	http://reactome.org/PathwayBrowser/#/R-MMU-111447	7	3	0.243094	12.3409	0.00124229	0.165224	22627;22629;22630	P62259;P68254;P68510
8	R-MMU-1445148	Translocation of SLC2A4 (GLUT4) to the plasma membrane	http://reactome.org/PathwayBrowser/#/R-MMU-1445148	7	3	0.243094	12.3409	0.00124229	0.165224	22627;22629;22630	P62259;P68254;P68510
8	R-MMU-114452	Activation of BH3-only proteins	http://reactome.org/PathwayBrowser/#/R-MMU-114452	8	3	0.277822	10.7983	0.00193951	0.214962	22627;22629;22630	P62259;P68254;P68510
8	R-MMU-69620	Cell Cycle Checkpoints	http://reactome.org/PathwayBrowser/#/R-MMU-69620	72	8	2.50039	3.19949	0.00248888	0.236444	103573;18472;21762;22627;22629;22630;235661;56430	P62259;P63005;P68254;P68510;Q6P5F9;Q8R1Q8;Q8VDM4;Q922J3
8	R-MMU-109606	Intrinsic Pathway for Apoptosis	http://reactome.org/PathwayBrowser/#/R-MMU-109606	10	3	0.347277	8.63864	0.00395749	0.328966	22627;22629;22630	P62259;P68254;P68510
8	R-MMU-1632852	Macroautophagy	http://reactome.org/PathwayBrowser/#/R-MMU-1632852	12	3	0.416732	7.19886	0.00690946	0.383618	12421;19744;67841	Q921J2;Q9CPX6;Q9ESK9
8	R-MMU-141424	Amplification of signal from the kinetochores	http://reactome.org/PathwayBrowser/#/R-MMU-141424	23	4	0.798737	5.00791	0.00692242	0.383618	103573;18472;235661;56430	P63005;Q6P5F9;Q8R1Q8;Q922J3
