# Supplementary material for: Dynamic proteomic and phosphoproteomic atlas of corticostriatal axons in neurodevelopment
Source: eLife. 2022 Oct 14;11:e78847. doi: 10.7554/eLife.78847 (PMC9629834; doi:10.7554/eLife.78847)
Supplement: Supplementary file 10. [file elife-78847-supp10.xlsx]

## Sheet: 20220217_phosphopeptide_STRaxon
prot	feature	cluster	pep	padjust	Plex1.neonate1	Plex1.neonate2	Plex2.neonate3	Plex2.neonate4	Plex2.neonate5	Plex1.earlypostnatal1	Plex1.earlypostnatal2	Plex1.earlypostnatal3	Plex2.earlypostnatal4	Plex2.earlypostnatal5	Plex1.preweanling1	Plex1.preweanling2	Plex2.preweanling3	Plex2.preweanling4	Plex2.preweanling5	Plex1.adult1	Plex1.adult2	Plex1.adult3	Plex2.adult4	Plex2.adult5	seq	modStr	Positions.in.Master.Proteins	Modifications.in.Master.Proteins	numPhos	centered_motif	Gene Symbol
A2A5R2	RcsVTSVESTVSSGTQTAIQDDPEQFEVIk.A2A5R2	NA	RcsVTSVESTVSSGTQTAIQDDPEQFEVIk	0.274778	3.19471	3.89667	3.88781	3.89209	4.00209	3.36511	3.5265	3.11595	4.23226	3.87956	3.33262	3.40513	3.62625	3.37388	3.84571	4.1226	3.94102	3.4225	3.9572	4.28296	[R].RCSVTSVESTVSSGTQTAIQDDPEQFEVIK.[Q]	1xCarbamidomethyl [C2]; 1xPhospho [S3]; 1xTMTpro [K30]; 1xTMTpro [N-Term]	A2A5R2 [619-648]	A2A5R2 1xPhospho [S621]	1	_____RCsVTSVEST	Arfgef2
A2A5R2	ERGsPVSGR.A2A5R2	3	ERGsPVSGR	0.000279343	4.89872	4.81709	5.23301	5.18315	4.36385	5.06425	4.94718	5.12815	5.3118	5.57379	5.47109	5.26766	5.78553	5.85664	5.71373	5.99964	5.73092	5.75534	6.43868	6.37169	[R].ERGSPVSGR.[A]	1xPhospho [S4]; 1xTMTpro [N-Term]	A2A5R2 [273-281]	A2A5R2 1xPhospho [S276]	1	____ERGsPVSGR__	Arfgef2
A2A690	HTPLRTsLR.A2A690	NA	HTPLRTsLR	0.348931	6.48721	6.49158	6.43939	6.62991	6.45185	6.5827	6.5221	6.47286	6.92686	7.14822	6.77148	6.32819	6.85053	6.87567	6.67102	6.30323	6.29262	6.33649	6.77181	6.89038	[R].HTPLRTSLR.[M]	1xPhospho [S7]; 1xTMTpro [N-Term]	A2A690 [288-296]	A2A690 1xPhospho [S294]	1	_HTPLRTsLR_____	Tanc2
A2A690	QSsVDSR.A2A690	NA	QSsVDSR	0.953229	6.05646	6.01183	6.4649	6.64262	7.00523	6.4173	6.05083	5.41675	7.02332	7.24419	6.03455	6.97593	6.94564	6.40753	6.32209	6.72778	6.96528	7.11099	6.18435	6.00252	[R].QSSVDSR.[Q]	1xPhospho [S3]; 1xTMTpro [N-Term]	A2A690 [34-40]	A2A690 1xPhospho [S36]	1	_____QSsVDSR___	Tanc2
A2A690	YQQETNVSQLPGRPksPLSk.A2A690	2	YQQETNVSQLPGRPksPLSk	0.00201869	4.94447	4.77665	4.82921	4.99456	5.11907	5.18574	5.09771	5.27478	5.45976	5.38768	5.11621	4.70982	5.21382	5.29783	4.81842	4.03656	4.30597	4.63019	4.81301	4.80192	[R].YQQETNVSQLPGRPKSPLSK.[M]	1xPhospho [S16]; 2xTMTpro [K15; K20]; 1xTMTpro [N-Term]	A2A690 [1568-1587]	A2A690 1xPhospho [S1583]	1	QLPGRPKsPLSK___	Tanc2
A2A690	SNSSVGsPTR.A2A690	2	SNSSVGsPTR	0.00823313	6.26584	6.1514	6.4322	6.14288	5.80928	6.34547	6.75139	7.28077	6.78548	6.66286	6.52008	5.99216	6.72601	6.86692	6.54563	5.76606	5.71305	5.40239	6.33452	6.35052	[R].SNSSVGSPTR.[Q]	1xPhospho [S7]; 1xTMTpro [N-Term]	A2A690 [1474-1483]	A2A690 1xPhospho [S1480]	1	_SNSSVGsPTR____	Tanc2
A2A690	FsPPPVGGQSk.A2A690	2	FsPPPVGGQSk	0.121503	5.69422	5.64361	5.99896	5.45864	5.20743	5.46771	5.90509	6.18687	6.08623	5.76601	5.09513	5.23281	5.92159	5.72062	5.87288	5.32514	5.37207	5.25599	5.561	5.4797	[R].FSPPPVGGQSK.[E]	1xPhospho [S2]; 1xTMTpro [K11]; 1xTMTpro [N-Term]	A2A690 [1520-1530]	A2A690 1xPhospho [S1521]	1	______FsPPPVGGQ	Tanc2
A2A690	QLsRDSR.A2A690	5	QLsRDSR	0.000281665	5.47837	5.82178	5.05781	5.64476	6.104	5.34468	5.04639	3.75298	5.31229	5.44427	3.93863	4.69792	4.57406	4.46033	3.91739	3.4945	3.85927	4.02713	4.13498	3.3835	[R].QLSRDSR.[Q]	1xPhospho [S3]; 1xTMTpro [N-Term]	A2A690 [1970-1976]	A2A690 1xPhospho [S1972]	1	_____QLsRDSR___	Tanc2
A2A690	SQSGsPVR.A2A690	2	SQSGsPVR	0.113336	6.1218	5.96141	5.96021	6.00255	5.4094	5.47152	6.14052	6.71124	6.08443	5.66009	5.60519	4.848	6.68473	6.31934	5.39709	5.10588	4.8433	4.84535	5.69973	5.52752	[R].SQSGSPVR.[Y]	1xPhospho [S5]; 1xTMTpro [N-Term]	A2A690 [1560-1567]	A2A690 1xPhospho [S1564]	1	___SQSGsPVR____	Tanc2
A2A690	ELPLTQAPSAHSSITSGScPGtPEmR.A2A690	5	ELPLTQAPSAHSSITSGScPGtPEmR	0.222324	7.16799	7.09945	7.11602	7.24743	7.28529	7.08846	7.08133	7.02149	7.14524	7.24775	6.83456	6.92747	7.1256	6.97226	7.1964	6.84315	7.022	6.83529	7.16236	7.27404	[R].ELPLTQAPSAHSSITSGSCPGTPEMR.[R]	1xCarbamidomethyl [C19]; 1xPhospho [T22]; 1xOxidation [M25]; 1xTMTpro [N-Term]	A2A690 [413-438]	A2A690 1xPhospho [T434]	1	TSGSCPGtPEMR___	Tanc2
A2A690	SQsASYYPVcHSk.A2A690	NA	SQsASYYPVcHSk	0.385046	7.55662	7.48213	7.54546	7.66189	7.73876	7.68384	7.6487	6.96993	7.75183	7.86419	7.27731	7.73284	7.82223	7.42814	7.5558	7.30931	7.39712	7.4159	7.31715	7.43148	[R].SQSASYYPVCHSK.[L]	1xCarbamidomethyl [C10]; 1xPhospho [S3]; 1xTMTpro [K13]; 1xTMTpro [N-Term]	A2A690 [1724-1736]	A2A690 1xPhospho [S1726]	1	_____SQsASYYPVC	Tanc2
A2A699	sVEGPGGLEPSLDEYR.A2A699	1	sVEGPGGLEPSLDEYR	0.00023089	5.7766	5.66193	5.94181	5.80679	5.74742	5.43476	5.42489	5.19482	5.69929	5.72525	5.0711	4.77436	5.23665	5.05354	5.0507	4.77673	5.10351	5.34725	5.3567	5.3293	[R].SVEGPGGLEPSLDEYR.[R]	1xPhospho [S1]; 1xTMTpro [N-Term]	A2A699 [445-460]	A2A699 1xPhospho [S445]	1	_______sVEGPGGL	Fam171a2
A2A699	SARsVEGPGGLEPSLDEYRR.A2A699	1	SARsVEGPGGLEPSLDEYRR	0.00101082	6.69678	6.86613	7.11332	7.22008	7.55139	6.65707	6.40695	6.16303	6.65074	6.86384	6.38894	6.30619	6.25759	6.44818	5.94833	6.38539	6.43137	6.46065	6.6115	6.39448	[K].SARSVEGPGGLEPSLDEYRR.[G]	1xPhospho [S4]; 1xTMTpro [N-Term]	A2A699 [442-461]	A2A699 1xPhospho [S445]	1	____SARsVEGPGGL	Fam171a2
A2A699	sVEGPGGLEPSLDEYRR.A2A699	5	sVEGPGGLEPSLDEYRR	0.00115616	6.84918	6.75506	6.81066	7.00505	6.84056	6.48866	6.70405	6.61679	7.06179	6.82812	6.26722	6.19532	6.48342	6.50448	6.21039	6.32534	6.30221	6.12487	6.62279	6.59498	[R].SVEGPGGLEPSLDEYRR.[G]	1xPhospho [S1]; 1xTMTpro [N-Term]	A2A699 [445-461]	A2A699 1xPhospho [S445]	1	_______sVEGPGGL	Fam171a2
A2A699	DLASsRDDFFR.A2A699	5	DLASsRDDFFR	2.15e-05	5.64462	5.91192	6.26716	5.86264	5.99024	5.61538	5.21965	5.41336	5.59494	5.71519	5.15073	4.30266	5.04692	4.91176	4.4641	5.00765	4.74098	4.58684	4.99919	4.82669	[R].DLASSRDDFFR.[A]	1xPhospho [S5]; 1xTMTpro [N-Term]	A2A699 [406-416]	A2A699 1xPhospho [S410]	1	___DLASsRDDFFR_	Fam171a2
A2A699	SARsVEGPGGLEPSLDEYR.A2A699	1	SARsVEGPGGLEPSLDEYR	0.00171823	6.88741	6.88583	6.89356	6.7399	7.13074	6.6467	6.44088	6.24805	6.57194	6.67295	6.4715	6.16371	6.45603	6.29175	6.29573	6.13049	6.27881	6.43829	6.63007	6.74311	[K].SARSVEGPGGLEPSLDEYR.[R]	1xPhospho [S4]; 1xTMTpro [N-Term]	A2A699 [442-460]	A2A699 1xPhospho [S445]	1	____SARsVEGPGGL	Fam171a2
A2AAE1	TTFSENLsPkQDIR.A2AAE1	3	TTFSENLsPkQDIR	0.0460251	6.94209	6.88014	7.28717	7.21841	7.47232	7.13802	7.14147	7.01838	7.34401	7.80577	7.5543	7.44428	7.37625	7.39199	7.42857	7.47701	7.56325	7.66441	7.46544	7.70316	[K].TTFSENLSPKQDIR.[G]	1xPhospho [S8]; 1xTMTpro [K10]; 1xTMTpro [N-Term]	A2AAE1 [1674-1687]	A2AAE1 1xPhospho [S1681]	1	TTFSENLsPKQDIR_	Kiaa1109
A2AAE1	SSETFGPAGVRsPTEPTcR.A2AAE1	3	SSETFGPAGVRsPTEPTcR	0.000134719	6.1295	6.33312	6.25009	6.30207	6.44684	6.3971	6.48062	6.56869	6.78676	6.96832	6.77819	6.90979	7.18399	7.13249	7.07267	6.7823	6.79225	6.95412	7.21312	7.16323	[K].SSETFGPAGVRSPTEPTCR.[V]	1xCarbamidomethyl [C18]; 1xPhospho [S12]; 1xTMTpro [N-Term]	A2AAE1 [2726-2744]	A2AAE1 1xPhospho [S2737]	1	FGPAGVRsPTEPTCR	Kiaa1109
A2AAE1	VVFENEQDNNsLTk.A2AAE1	3	VVFENEQDNNsLTk	0.0339771	5.61206	4.93047	5.81512	5.88014	5.84275	5.79868	5.81652	5.79593	6.19102	6.36761	6.39726	5.82968	6.17295	6.45992	6.32234	5.81537	5.97684	5.98959	6.23005	6.24891	[R].VVFENEQDNNSLTK.[T]	1xPhospho [S11]; 1xTMTpro [K14]; 1xTMTpro [N-Term]	A2AAE1 [2745-2758]	A2AAE1 1xPhospho [S2755]	1	ENEQDNNsLTK____	Kiaa1109
A2AAE1	IGETDELPEIRVDAAsPGPR.A2AAE1	NA	IGETDELPEIRVDAAsPGPR	0.161761	5.73725	6.01749	6.28843	6.57262	6.56014	5.91928	5.48776	5.37102	5.85289	6.25943	6.10132	6.22655	5.54792	5.81829	5.60081	5.63848	5.85697	6.08368	6.05595	5.87513	[R].IGETDELPEIRVDAASPGPR.[V]	1xPhospho [S16]; 1xTMTpro [N-Term]	A2AAE1 [3638-3657]	A2AAE1 1xPhospho [S3653]	1	EIRVDAAsPGPR___	Kiaa1109
A2AAE1	AsPGSSSYLk.A2AAE1	NA	AsPGSSSYLk	0.498185	5.23284	5.13762	5.34182	5.00174	5.2459	5.02287	5.41651	5.44955	5.47015	5.27523	5.08637	5.03797	5.53247	5.58945	5.1536	5.00649	4.91986	4.84	5.43303	5.39175	[K].ASPGSSSYLK.[L]	1xPhospho [S2]; 1xTMTpro [K10]; 1xTMTpro [N-Term]	A2AAE1 [3195-3204]	A2AAE1 1xPhospho [S3196]	1	______AsPGSSSYL	Kiaa1109
A2AAE1	ALETIPItPIER.A2AAE1	3	ALETIPItPIER	0.0347064	5.61772	5.78575	6.03952	5.96647	6.12075	5.9211	5.69527	5.6282	6.12144	6.15222	6.40223	5.98029	6.14791	6.15406	6.2444	6.4091	6.35206	6.05926	6.15023	6.13238	[K].ALETIPITPIER.[N]	1xPhospho [T8]; 1xTMTpro [N-Term]	A2AAE1 [3989-4000]	A2AAE1 1xPhospho [T3996]	1	ALETIPItPIER___	Kiaa1109
A2AAE1	TTFSENLsPk.A2AAE1	4	TTFSENLsPk	0.0225333	5.02744	4.67007	5.1615	4.80983	5.01755	5.07845	5.5559	6.28958	5.66311	5.50977	5.50025	5.32226	5.6437	6.10742	5.98115	5.38944	5.53516	5.01845	6.08944	6.02389	[K].TTFSENLSPK.[Q]	1xPhospho [S8]; 1xTMTpro [K10]; 1xTMTpro [N-Term]	A2AAE1 [1674-1683]	A2AAE1 1xPhospho [S1681]	1	TTFSENLsPK_____	Kiaa1109
A2AAE1	YTAGSAsPTPTFk.A2AAE1	3	YTAGSAsPTPTFk	3.62e-05	6.84395	6.82476	7.00013	6.87107	6.89775	7.07938	7.21891	7.16038	7.37692	7.68571	7.58992	7.38313	7.41114	7.60626	7.57121	7.51404	7.47326	7.48173	7.69526	7.74279	[R].YTAGSASPTPTFK.[T]	1xPhospho [S7]; 1xTMTpro [K13]; 1xTMTpro [N-Term]	A2AAE1 [2597-2609]	A2AAE1 1xPhospho [S2603]	1	_YTAGSAsPTPTFK_	Kiaa1109
A2AAE1	SDENVLDsPk.A2AAE1	NA	SDENVLDsPk	0.416211	5.38491	5.60144	5.80648	5.67979	5.66694	5.48045	5.92835	6.12828	5.6888	5.56149	5.34313	5.20926	5.68166	5.75684	5.69721	5.70894	5.4193	5.10509	5.79659	5.52579	[R].SDENVLDSPK.[Q]	1xPhospho [S8]; 1xTMTpro [K10]; 1xTMTpro [N-Term]	A2AAE1 [1348-1357]	A2AAE1 1xPhospho [S1355]	1	SDENVLDsPK_____	Kiaa1109
A2AAE1	TEsPNASR.A2AAE1	2	TEsPNASR	0.0931061	5.27595	5.38814	5.62362	5.40263	5.19825	5.37333	5.64281	5.84699	5.77703	5.54926	4.89925	4.74981	5.29721	6.04241	5.43294	4.74605	5.15415	5.15945	5.27798	5.15481	[K].TESPNASR.[G]	1xPhospho [S3]; 1xTMTpro [N-Term]	A2AAE1 [3892-3899]	A2AAE1 1xPhospho [S3894]	1	_____TEsPNASR__	Kiaa1109
A2AAE1	QIsDLIR.A2AAE1	4	QIsDLIR	0.000667375	5.32238	5.43458	5.72245	5.61418	5.658	6.50176	6.64001	6.85334	6.4584	6.40789	5.90226	5.84394	6.54445	6.59833	6.85442	6.57165	6.49429	6.02614	6.79018	6.23838	[K].QISDLIR.[Q]	1xPhospho [S3]; 1xTMTpro [N-Term]	A2AAE1 [2922-2928]	A2AAE1 1xPhospho [S2924]	1	_____QIsDLIR___	Kiaa1109
A2AAE1	RDsISk.A2AAE1	7	RDsISk	0.0359285	7.76754	7.66231	7.53038	7.49742	7.31662	8.19898	8.60872	8.12459	8.472	8.33472	8.13657	6.99219	8.3315	8.36916	8.24511	8.35307	8.05459	7.4634	8.23467	7.94103	[R].RDSISK.[T]	1xPhospho [S3]; 1xTMTpro [K6]; 1xTMTpro [N-Term]	A2AAE1 [4376-4381]	A2AAE1 1xPhospho [S4378]	1	_____RDsISK____	Kiaa1109
A2AG50	EEsLEkR.A2AG50	4	EEsLEkR	0.00202442	4.74298	4.94432	5.20122	4.97129	5.06664	5.58341	5.93354	7.05726	6.02682	5.67345	5.73028	5.85327	6.9604	6.18379	6.83396	5.70992	6.22825	6.00425	6.53232	6.17197	[R].EESLEKR.[M]	1xPhospho [S3]; 1xTMTpro [K6]; 1xTMTpro [N-Term]	A2AG50 [399-405]	A2AG50 1xPhospho [S401]	1	_____EEsLEKR___	Map7d2
A2AHC3	RPsEGSQPmVR.A2AHC3	NA	RPsEGSQPmVR	0.253914	4.96983	5.25752	5.3445	5.99752	5.58282	6.11268	5.76039	4.83112	5.94332	5.95552	5.08968	5.87299	5.97456	5.85892	5.42863	5.29596	5.34353	5.29663	5.23119	5.07668	[K].RPSEGSQPMVR.[K]	1xPhospho [S3]; 1xOxidation [M9]; 1xTMTpro [N-Term]	A2AHC3 [624-634]	A2AHC3 1xPhospho [S626]	1	_____RPsEGSQPMV	Camsap1
A2AHC3	APVHFVEPLsPTGVPGHR.A2AHC3	5	APVHFVEPLsPTGVPGHR	0.0142968	7.29789	7.33933	7.68462	7.68788	7.43969	7.01055	7.19434	7.07826	7.59888	7.4365	7.02761	6.94579	7.30438	7.25831	7.18432	6.93464	6.90477	6.90285	7.14881	7.23482	[K].APVHFVEPLSPTGVPGHR.[K]	1xPhospho [S10]; 1xTMTpro [N-Term]	A2AHC3 [1060-1077]	A2AHC3 1xPhospho [S1069]	1	VHFVEPLsPTGVPGH	Camsap1
A2AHC3	LNscETk.A2AHC3	NA	LNscETk	0.0939842	4.68551	3.76914	4.82047	4.47705	4.58426	4.56186	4.69119	4.37898	4.96799	5.24319	4.56676	4.75662	4.46425	4.66706	4.96514	4.25411	3.95493	4.47007	4.47015	4.17435	[R].LNSCETK.[S]	1xCarbamidomethyl [C4]; 1xPhospho [S3]; 1xTMTpro [K7]; 1xTMTpro [N-Term]	A2AHC3 [821-827]	A2AHC3 1xPhospho [S823]	1	_____LNsCETK___	Camsap1
A2AHC3	TSPQAPGLVASIRsPQR.A2AHC3	5	TSPQAPGLVASIRsPQR	0.000995765	7.61422	7.56134	6.97681	7.05318	6.89552	7.27706	7.33481	7.01632	7.26283	7.20654	6.59679	5.9508	6.80413	6.8245	6.63837	5.82389	6.03598	6.01136	6.62079	6.77176	[R].TSPQAPGLVASIRSPQR.[Q]	1xPhospho [S14]; 1xTMTpro [N-Term]	A2AHC3 [559-575]	A2AHC3 1xPhospho [S572]	1	GLVASIRsPQR____	Camsap1
A2AHC3	IkAPVHFVEPLsPTGVPGHR.A2AHC3	5	IkAPVHFVEPLsPTGVPGHR	3.11e-05	6.73821	6.54772	6.83565	6.81188	7.02053	6.73678	6.84465	6.51408	6.52478	6.57865	6.43644	6.20639	6.02962	6.17387	6.28121	5.97934	5.94106	6.11178	6.1958	6.30407	[K].IKAPVHFVEPLSPTGVPGHR.[K]	1xPhospho [S12]; 1xTMTpro [K2]; 1xTMTpro [N-Term]	A2AHC3 [1058-1077]	A2AHC3 1xPhospho [S1069]	1	VHFVEPLsPTGVPGH	Camsap1
A2AHC3	EQsPGRHSk.A2AHC3	5	EQsPGRHSk	0.100197	5.58254	5.41618	5.52107	5.63529	5.24619	5.71603	5.66485	4.67334	5.02682	6.23565	5.62254	4.77158	5.28187	5.47267	5.01663	5.03497	4.86372	4.71075	4.13033	5.32043	[R].EQSPGRHSK.[D]	1xPhospho [S3]; 1xTMTpro [K9]; 1xTMTpro [N-Term]	A2AHC3 [856-864]	A2AHC3 1xPhospho [S858]	1	_____EQsPGRHSK_	Camsap1
A2AJA9	VEGsPR.A2AJA9	3	VEGsPR	0.00106923	5.30423	5.2092	5.05296	5.48865	5.27814	5.11187	5.23645	6.35704	5.25182	5.08715	6.07225	5.50594	7.27245	7.04901	6.40979	6.89505	6.53689	6.15235	7.7159	7.48965	[R].VEGSPR.[R]	1xPhospho [S4]; 1xTMTpro [N-Term]	A2AJA9 [126-131]	A2AJA9 1xPhospho [S129]	1	____VEGsPR_____	Ajm1
A2AJA9	ASQGLATAPAsPPVLQR.A2AJA9	NA	ASQGLATAPAsPPVLQR	0.356841	5.33433	4.76549	5.03003	5.17784	5.2527	4.91097	4.63021	4.65518	5.1751	5.31004	4.64489	4.57533	5.07828	5.05355	4.95692	5.09898	4.79719	5.00656	5.24949	5.35396	[R].ASQGLATAPASPPVLQR.[R]	1xPhospho [S11]; 1xTMTpro [N-Term]	A2AJA9 [99-115]	A2AJA9 1xPhospho [S109]	1	GLATAPAsPPVLQR_	Ajm1
A2AJA9	VALAAGsPTRPPPAR.A2AJA9	6	VALAAGsPTRPPPAR	0.000256239	5.21303	5.60864	5.24858	5.71495	5.59732	5.33183	4.84457	5.22298	5.29514	5.51425	5.61571	5.62461	5.95664	5.78327	6.03942	5.95062	5.90527	6.0264	6.27131	6.39983	[K].VALAAGSPTRPPPAR.[G]	1xPhospho [S7]; 1xTMTpro [N-Term]	A2AJA9 [848-862]	A2AJA9 1xPhospho [S854]	1	_VALAAGsPTRPPPA	Ajm1
A2AJA9	RPPVVVNLStSPR.A2AJA9	NA	RPPVVVNLStSPR	0.700552	5.98837	6.01204	6.16928	5.97564	6.20469	5.85772	6.02187	6.45622	5.97827	5.93864	5.9443	5.92702	6.47969	6.29174	6.41211	5.74835	6.00665	6.01304	6.65169	6.65826	[R].RPPVVVNLSTSPR.[R]	1xPhospho [T10]; 1xTMTpro [N-Term]	A2AJA9 [489-501]	A2AJA9 1xPhospho [T498]	1	PVVVNLStSPR____	Ajm1
A2AJA9	GRsYENLLGR.A2AJA9	6	GRsYENLLGR	0.00327208	5.60269	5.59096	5.98142	6.02621	6.06974	5.49076	5.27147	5.55657	5.76815	5.85315	5.96769	5.62162	6.36763	5.94114	5.7986	6.29766	6.11778	6.18644	6.36514	6.55746	[R].GRSYENLLGR.[E]	1xPhospho [S3]; 1xTMTpro [N-Term]	A2AJA9 [466-475]	A2AJA9 1xPhospho [S468]	1	_____GRsYENLLGR	Ajm1
A2AJA9	GSsPEGR.A2AJA9	3	GSsPEGR	2.76e-05	5.12449	5.41141	5.39765	5.53876	5.70595	5.56345	5.67469	6.14759	5.99289	5.93684	6.25243	5.97668	6.89368	6.74218	6.71948	6.83736	6.55733	6.44066	7.09005	6.91574	[R].GSSPEGR.[R]	1xPhospho [S3]; 1xTMTpro [N-Term]	A2AJA9 [482-488]	A2AJA9 1xPhospho [S484]	1	_____GSsPEGR___	Ajm1
A2AJI0	LSTGSELsPk.A2AJI0	5	LSTGSELsPk	0.0514254	4.75982	4.51106	4.94719	5.11193	5.12376	4.2274	3.98795	4.47265	4.51891	4.36808	4.6305	4.30163	4.89833	4.8002	4.10932	4.20761	4.11034	4.19028	4.83215	4.78615	[R].LSTGSELSPK.[S]	1xPhospho [S8]; 1xTMTpro [K10]; 1xTMTpro [N-Term]	A2AJI0 [453-462]	A2AJI0 1xPhospho [S460]	1	LSTGSELsPK_____	Map7d1
A2AJI0	sAVTLPR.A2AJI0	1	sAVTLPR	5.19e-06	7.83978	7.7141	7.62033	7.6732	7.70511	7.0987	6.94	6.92388	7.15759	6.97247	6.78546	6.7062	7.25025	7.05953	7.08677	6.77702	6.59677	6.6412	6.94334	7.01838	[R].SAVTLPR.[N]	1xPhospho [S1]; 1xTMTpro [N-Term]	A2AJI0 [315-321]	A2AJI0 1xPhospho [S315]	1	_______sAVTLPR_	Map7d1
A2AJI0	cSVsAVNLPk.A2AJI0	1	cSVsAVNLPk	0.0295444	5.10116	4.31769	5.24125	5.09719	5.14687	4.60272	4.23638	3.96108	4.75751	4.66414	4.71253	4.36105	4.60837	4.53653	4.37594	4.52998	4.15771	4.3983	4.69556	4.3296	[R].CSVSAVNLPK.[H]	1xCarbamidomethyl [C1]; 1xPhospho [S4]; 1xTMTpro [K10]; 1xTMTpro [N-Term]	A2AJI0 [253-262]	A2AJI0 1xPhospho [S256]	1	____CSVsAVNLPK_	Map7d1
A2AJI0	RkPGAGGsPALAR.A2AJI0	5	RkPGAGGsPALAR	0.0105579	6.94761	6.88182	6.85834	7.35428	7.5075	6.42669	6.2062	6.76046	6.7248	6.65844	6.63484	6.62947	6.74672	7.17351	6.71208	5.98215	6.13931	6.68077	6.60919	6.67685	[R].RKPGAGGSPALAR.[R]	1xPhospho [S8]; 1xTMTpro [K2]; 1xTMTpro [N-Term]	A2AJI0 [394-406]	A2AJI0 1xPhospho [S401]	1	RKPGAGGsPALAR__	Map7d1
A2AJI0	SRsAVTLPR.A2AJI0	6	SRsAVTLPR	0.0876857	6.21043	6.3976	6.3346	6.5878	6.54168	6.15364	5.97603	5.9518	6.27728	6.17977	6.43641	6.27008	6.28725	6.60269	6.27018	5.97724	5.96118	6.4172	6.52536	6.36265	[R].SRSAVTLPR.[N]	1xPhospho [S3]; 1xTMTpro [N-Term]	A2AJI0 [313-321]	A2AJI0 1xPhospho [S315]	1	_____SRsAVTLPR_	Map7d1
A2AJI0	GTTAsPk.A2AJI0	3	GTTAsPk	0.00180594	4.17232	4.22219	4.69156	5.06606	4.69413	4.17678	4.43201	5.35506	4.97977	4.44481	5.07149	5.51693	5.86444	5.66793	5.24546	5.24192	5.44697	5.42942	5.63437	5.41001	[R].GTTASPK.[G]	1xPhospho [S5]; 1xTMTpro [K7]; 1xTMTpro [N-Term]	A2AJI0 [499-505]	A2AJI0 1xPhospho [S503]	1	___GTTAsPK_____	Map7d1
A2ALS5	REsPPAGQk.A2ALS5	4	REsPPAGQk	0.0320869	6.00441	5.33855	5.77889	5.70412	5.55528	5.82219	6.51258	6.98794	6.25614	5.82156	5.66572	6.00312	7.15273	6.74212	7.15835	6.63411	6.17868	6.5155	6.88904	6.78223	[K].RESPPAGQK.[T]	1xPhospho [S3]; 1xTMTpro [K9]; 1xTMTpro [N-Term]	A2ALS5 [513-521]	A2ALS5 1xPhospho [S515]	1	_____REsPPAGQK_	Rap1gap
A2ALS5	RSsAIGIENIQEVQEkR.A2ALS5	1	RSsAIGIENIQEVQEkR	0.00763531	6.7273	6.88756	6.92403	6.77323	7.74072	6.42734	5.63399	4.99332	5.96187	6.42059	6.21406	6.80701	6.19732	5.83564	6.02727	6.27239	6.25454	6.52251	6.32767	6.44463	[R].RSSAIGIENIQEVQEKR.[E]	1xPhospho [S3]; 1xTMTpro [K16]; 1xTMTpro [N-Term]	A2ALS5 [497-513]	A2ALS5 1xPhospho [S499]	1	_____RSsAIGIENI	Rap1gap
A2ALS5	NRVEsAAQR.A2ALS5	5	NRVEsAAQR	0.0010756	4.71486	4.97046	5.07179	4.44232	5.42054	4.12441	4.1514	4.61523	4.24839	4.72698	4.66981	4.31765	4.6086	5.11199	4.39294	3.72401	3.48031	3.84936	4.30692	3.77303	[K].NRVESAAQR.[T]	1xPhospho [S5]; 1xTMTpro [N-Term]	A2ALS5 [550-558]	A2ALS5 1xPhospho [S554]	1	___NRVEsAAQR___	Rap1gap
A2ALS5	RSsAIGIENIQEVQEk.A2ALS5	NA	RSsAIGIENIQEVQEk	0.341252	6.83748	6.52533	6.69749	6.64587	6.93342	6.56786	6.79227	6.15469	7.08527	6.72882	6.24529	6.36011	6.58334	6.26236	6.93765	6.63752	6.47808	6.29643	6.64644	6.34699	[R].RSSAIGIENIQEVQEK.[R]	1xPhospho [S3]; 1xTMTpro [K16]; 1xTMTpro [N-Term]	A2ALS5 [497-512]	A2ALS5 1xPhospho [S499]	1	_____RSsAIGIENI	Rap1gap
A2ALS5	SSAIGIENIQEVQEkREsPPAGQk.A2ALS5	3	SSAIGIENIQEVQEkREsPPAGQk	0.00612025	5.74314	5.32683	6.42005	5.97472	6.23961	6.11067	6.22713	6.26739	6.22969	6.2538	6.50315	6.32403	6.8483	6.32106	6.70316	6.93822	6.75997	6.51666	6.42454	6.51436	[R].SSAIGIENIQEVQEKRESPPAGQK.[T]	1xPhospho [S18]; 2xTMTpro [K15; K24]; 1xTMTpro [N-Term]	A2ALS5 [498-521]	A2ALS5 1xPhospho [S515]	1	EVQEKREsPPAGQK_	Rap1gap
A2ALU4	SPsPQFAPQk.A2ALU4	4	SPsPQFAPQk	0.0155165	6.60622	6.06081	6.76477	6.5356	6.22723	6.65163	7.12071	7.20158	7.07104	6.9241	6.46191	6.21167	7.17699	6.76934	7.18731	7.36874	7.10811	6.73865	7.38453	7.37257	[R].SPSPQFAPQK.[L]	1xPhospho [S3]; 1xTMTpro [K10]; 1xTMTpro [N-Term]	A2ALU4 [1041-1050]	A2ALU4 1xPhospho [S1043]	1	_____SPsPQFAPQK	Shroom2
A2ALU4	kAPsPPPLGLPLR.A2ALU4	5	kAPsPPPLGLPLR	6.17e-07	6.19003	6.0179	6.50071	6.34035	6.39378	6.19588	6.32962	6.17745	6.54167	6.31122	5.49121	5.16606	5.91471	5.52092	5.45639	5.18506	5.21325	4.94181	5.25317	5.12118	[K].KAPSPPPLGLPLR.[S]	1xPhospho [S4]; 1xTMTpro [K1]; 1xTMTpro [N-Term]	A2ALU4 [315-327]	A2ALU4 1xPhospho [S318]	1	____KAPsPPPLGLP	Shroom2
A2AN08	HVTLPSsPR.A2AN08	8	HVTLPSsPR	0.0924546	5.9559	5.95913	6.22869	6.17957	6.00473	5.9611	5.99432	6.14496	6.49047	6.34245	6.07842	6.14575	6.73816	6.52958	6.76653	6.12021	6.16681	6.1785	6.36353	6.33939	[R].HVTLPSSPR.[S]	1xPhospho [S7]; 1xTMTpro [N-Term]	A2AN08 [2710-2718]	A2AN08 1xPhospho [S2716]	1	_HVTLPSsPR_____	Ubr4
A2AN08	TLSDVEDQkELAsPVSPELR.A2AN08	2	TLSDVEDQkELAsPVSPELR	1.72e-06	8.46713	8.67618	8.7094	8.5332	8.59175	8.71661	8.85183	8.86433	8.98832	9.08017	8.79931	8.47049	8.60513	8.75023	8.72939	8.02903	8.17003	8.15203	8.17901	8.18803	[K].TLSDVEDQKELASPVSPELR.[Q]	1xPhospho [S13]; 1xTMTpro [K9]; 1xTMTpro [N-Term]	A2AN08 [166-185]	A2AN08 1xPhospho [S178]	1	EDQKELAsPVSPELR	Ubr4
A2AP18	VAsVEEGDETLDSPGSQSR.A2AP18	6	VAsVEEGDETLDSPGSQSR	0.0036369	6.63447	6.55335	6.54753	6.86131	6.53797	6.54879	6.44709	6.50028	6.93688	6.92517	6.53542	6.89271	7.05446	6.87433	7.05595	6.98435	7.08307	7.06811	7.27176	7.41638	[K].VASVEEGDETLDSPGSQSR.[G]	1xPhospho [S3]; 1xTMTpro [N-Term]	A2AP18 [674-692]	A2AP18 1xPhospho [S676]	1	_____VAsVEEGDET	Plch2
A2AP18	kVAsVEEGDETLDSPGSQSR.A2AP18	3	kVAsVEEGDETLDSPGSQSR	1.7e-06	5.74291	5.97164	5.72012	6.10642	6.02868	6.41156	6.49073	6.59591	6.90621	6.84122	6.54703	7.08235	7.09606	7.22016	7.22995	7.25007	7.39362	7.07374	7.32447	7.55315	[K].KVASVEEGDETLDSPGSQSR.[G]	1xPhospho [S4]; 1xTMTpro [K1]; 1xTMTpro [N-Term]	A2AP18 [673-692]	A2AP18 1xPhospho [S676]	1	____KVAsVEEGDET	Plch2
A2APV2	sIEDLHR.A2APV2	5	sIEDLHR	0.000456404	7.32672	6.77605	7.39444	7.58147	7.0719	6.75342	7.09027	6.9524	7.2143	7.05366	6.31499	6.12869	7.03889	6.56239	6.52363	6.64235	6.2889	6.23484	5.9608	6.16409	[R].SIEDLHR.[G]	1xPhospho [S1]; 1xTMTpro [N-Term]	A2APV2 [171-177]	A2APV2 1xPhospho [S171]	1	_______sIEDLHR_	Fmnl2
A2AQ25	TRAsLPVVR.A2AQ25	3	TRAsLPVVR	0.000102015	4.93638	5.11582	5.53183	5.48961	5.31438	5.65368	5.63925	5.08906	6.08084	6.29931	6.36062	6.77342	6.28857	6.45555	6.66683	6.36179	6.34161	6.14048	6.28683	6.1052	[R].TRASLPVVR.[S]	1xPhospho [S4]; 1xTMTpro [N-Term]	A2AQ25 [166-174]	A2AQ25 1xPhospho [S169]	1	____TRAsLPVVR__	Skt
A2AQ25	NRPGsLDk.A2AQ25	3	NRPGsLDk	6.31e-07	6.10703	5.97467	5.99674	5.87472	6.11474	7.40579	7.52123	7.97729	7.84223	7.90308	8.11108	8.11845	9.38286	9.31759	8.46846	9.44771	9.11503	8.24344	9.827	9.09063	[K].NRPGSLDK.[A]	1xPhospho [S5]; 1xTMTpro [K8]; 1xTMTpro [N-Term]	A2AQ25 [1758-1765]	A2AQ25 1xPhospho [S1762]	1	___NRPGsLDK____	Skt
A2AQ25	RQEQLsPEGTLPASR.A2AQ25	3	RQEQLsPEGTLPASR	2e-05	6.10024	6.19889	5.95987	6.3229	6.16532	5.96754	5.80298	5.95871	6.13578	6.35227	6.43456	6.74378	7.0254	6.98624	7.21594	6.73144	6.92538	7.08491	7.24822	7.38835	[R].RQEQLSPEGTLPASR.[T]	1xPhospho [S6]; 1xTMTpro [N-Term]	A2AQ25 [1642-1656]	A2AQ25 1xPhospho [S1647]	1	__RQEQLsPEGTLPA	Skt
A2AQ25	IPALsPSSGk.A2AQ25	4	IPALsPSSGk	0.000324654	6.07091	6.05096	5.71802	5.21268	5.54099	6.52325	6.67001	6.95832	6.92055	7.1796	6.97725	6.41056	7.56117	7.82097	7.40741	6.94683	6.94153	6.59498	7.61273	7.52693	[K].IPALSPSSGK.[S]	1xPhospho [S5]; 1xTMTpro [K10]; 1xTMTpro [N-Term]	A2AQ25 [1804-1813]	A2AQ25 1xPhospho [S1808]	1	___IPALsPSSGK__	Skt
A2AQ25	SIsPSPSAILER.A2AQ25	3	SIsPSPSAILER	9.12e-05	7.00839	6.88826	6.85197	6.95689	6.93085	6.89779	6.90018	7.43667	7.05304	7.29635	7.70082	7.12425	7.75671	7.85788	7.61904	7.70846	7.74029	7.64119	8.05779	8.25481	[R].SISPSPSAILER.[R]	1xPhospho [S3]; 1xTMTpro [N-Term]	A2AQ25 [359-370]	A2AQ25 1xPhospho [S361]	1	_____SIsPSPSAIL	Skt
A2AR50	LVSskEDLAGPSAGSSSAR.A2AR50	5	LVSskEDLAGPSAGSSSAR	3.85e-08	8.48977	8.4721	8.58594	8.67518	8.49572	8.28165	8.18562	7.93532	8.26429	8.45921	7.94675	7.39964	7.8083	7.81039	7.45141	6.83973	6.85094	7.11555	6.98429	7.08001	[R].LVSSKEDLAGPSAGSSSAR.[F]	1xPhospho [S4]; 1xTMTpro [K5]; 1xTMTpro [N-Term]	A2AR50 [295-313]	A2AR50 1xPhospho [S298]	1	____LVSsKEDLAGP	Ralgps1
A2AWA9	ILITkEsPQDSAITR.A2AWA9	NA	ILITkEsPQDSAITR	0.96002	5.62189	5.50076	5.68212	5.49628	5.76625	5.47711	5.71107	5.59956	5.58415	5.56574	5.52413	5.45139	5.40962	5.62144	5.89044	5.56041	5.4323	5.64122	5.78752	5.68305	[R].ILITKESPQDSAITR.[D]	1xPhospho [S7]; 1xTMTpro [K5]; 1xTMTpro [N-Term]	A2AWA9 [589-603]	A2AWA9 1xPhospho [S595]	1	_ILITKEsPQDSAIT	Rabgap1
A2CG49	ScsWHTLR.A2CG49	2	ScsWHTLR	0.000327894	5.80827	5.84768	5.45826	5.73765	5.7984	5.86992	5.51535	5.5168	5.53282	5.93597	5.68409	5.24656	5.51433	5.9061	5.26194	4.62615	4.68966	5.02714	5.05658	5.14673	[K].SCSWHTLR.[M]	1xCarbamidomethyl [C2]; 1xPhospho [S3]; 1xTMTpro [N-Term]	A2CG49 [2372-2379]	A2CG49 1xPhospho [S2374]	1	_____SCsWHTLR__	Kalrn
A2RSJ4	SAsDTNLQk.A2RSJ4	8	SAsDTNLQk	3.16e-05	6.16919	6.00466	6.56468	6.2905	6.6573	6.59415	6.64235	6.80006	6.88736	6.97559	7.14354	7.1043	7.26782	7.39104	7.35079	7.10443	7.06161	6.85631	7.03984	6.81646	[K].SASDTNLQK.[G]	1xPhospho [S3]; 1xTMTpro [K9]; 1xTMTpro [N-Term]	A2RSJ4 [950-958]	A2RSJ4 1xPhospho [S952]	1	_____SAsDTNLQK_	Uhrf1bp1l
A2TJV2	QGTSsPELPTWVk.A2TJV2	2	QGTSsPELPTWVk	3.36e-05	4.60967	4.84358	5.41341	4.56059	4.97405	5.67274	5.57481	5.35084	5.51563	5.63868	5.24273	5.10456	5.17322	5.2558	5.17848	4.25167	4.59767	4.55311	4.73719	4.56053	[R].QGTSSPELPTWVK.[E]	1xPhospho [S5]; 1xTMTpro [K13]; 1xTMTpro [N-Term]	A2TJV2 [266-278]	A2TJV2 1xPhospho [S270]	1	___QGTSsPELPTWV	Palm3
B1AWN6	kSAsEDSIR.B1AWN6	3	kSAsEDSIR	6.5e-06	6.09903	5.94721	5.68442	5.93064	5.97584	6.86775	7.08957	6.91519	7.28773	7.32783	6.78601	6.56779	7.42929	7.61004	7.48088	7.74141	7.55432	7.39517	8.20847	8.07004	[R].KSASEDSIR.[K]	1xPhospho [S4]; 1xTMTpro [K1]; 1xTMTpro [N-Term]	B1AWN6 [525-533]	B1AWN6 1xPhospho [S528]	1	____KSAsEDSIR__	Scn2a
B1AWN6	GSLFsPR.B1AWN6	4	GSLFsPR	0.0261808	6.07523	6.19597	6.41703	6.11145	6.28035	6.03647	5.96354	6.7892	6.31587	6.11872	7.07517	6.56075	6.98515	7.14918	6.34474	6.42623	6.31899	6.24343	7.04548	6.69151	[R].GSLFSPR.[R]	1xPhospho [S5]; 1xTMTpro [N-Term]	B1AWN6 [564-570]	B1AWN6 1xPhospho [S568]	1	___GSLFsPR_____	Scn2a
B1AWN6	GFRFsLEGSR.B1AWN6	3	GFRFsLEGSR	3.51e-09	4.50103	4.59557	4.35437	4.43604	4.68785	5.44555	5.51323	5.82567	5.95861	5.80418	6.65661	6.59936	6.88243	6.93207	6.71906	6.64419	6.49	6.2977	6.86681	6.37668	[K].GFRFSLEGSR.[L]	1xPhospho [S5]; 1xTMTpro [N-Term]	B1AWN6 [536-545]	B1AWN6 1xPhospho [S540]	1	___GFRFsLEGSR__	Scn2a
B1AWN6	ASLFsFkGR.B1AWN6	5	ASLFsFkGR	0.129587	6.56436	6.92873	7.1139	6.9924	7.11578	7.74502	7.6686	6.45781	8.34726	8.42891	6.21011	7.83502	7.9234	6.23827	6.81497	6.82665	6.95048	7.05315	6.63678	6.63748	[R].ASLFSFKGR.[V]	1xPhospho [S5]; 1xTMTpro [K7]; 1xTMTpro [N-Term]	B1AWN6 [575-583]	B1AWN6 1xPhospho [S579]	1	___ASLFsFKGR___	Scn2a
B1AY13	VSDQNsPVLPk.B1AY13	5	VSDQNsPVLPk	0.119791	8.16016	8.12616	8.36017	8.22563	8.06058	8.10368	8.23104	8.25905	8.55916	8.56901	8.02166	7.9073	8.43472	8.35959	8.19868	8.02477	7.98126	8.03901	8.14169	8.10684	[R].VSDQNSPVLPK.[K]	1xPhospho [S6]; 1xTMTpro [K11]; 1xTMTpro [N-Term]	B1AY13 [2039-2049]	B1AY13 1xPhospho [S2044]	1	__VSDQNsPVLPK__	Usp24
B1AZP2	AIQAGcSQEEDSVSLQSLsPPPSTGSLSNSR.B1AZP2	NA	AIQAGcSQEEDSVSLQSLsPPPSTGSLSNSR	0.204324	5.40515	5.47611	5.51186	5.89058	6.59757	5.53321	5.46436	5.52759	5.38385	5.54577	5.36688	5.35507	5.4541	5.36625	5.51167	5.48951	5.67687	5.51937	5.18961	5.45234	[R].AIQAGCSQEEDSVSLQSLSPPPSTGSLSNSR.[T]	1xCarbamidomethyl [C6]; 1xPhospho [S19]; 1xTMTpro [N-Term]	B1AZP2 [516-546]	B1AZP2 1xPhospho [S534]	1	SVSLQSLsPPPSTGS	Dlgap4
B1AZP2	QNsATESADSIEIYVPEAQTR.B1AZP2	5	QNsATESADSIEIYVPEAQTR	1.27e-05	5.68691	5.22005	5.36518	5.49842	5.81846	5.28674	5.25407	4.86417	5.37966	5.52169	5.04909	4.84864	4.82381	4.672	4.86034	4.2976	4.53747	4.11858	4.66812	4.15535	[R].QNSATESADSIEIYVPEAQTR.[L]	1xPhospho [S3]; 1xTMTpro [N-Term]	B1AZP2 [971-991]	B1AZP2 1xPhospho [S973]	1	_____QNsATESADS	Dlgap4
B1AZP2	RQsYLR.B1AZP2	8	RQsYLR	0.000850656	5.34997	5.71343	5.66079	5.56156	5.95754	6.61751	6.07923	5.59321	6.62824	6.81821	6.49878	6.70859	6.87108	6.62476	6.8642	6.16183	5.83589	6.05983	5.99002	6.28264	[R].RQSYLR.[A]	1xPhospho [S3]; 1xTMTpro [N-Term]	B1AZP2 [395-400]	B1AZP2 1xPhospho [S397]	1	_____RQsYLR____	Dlgap4
B1AZP2	RsLDRLDSVDmLLPSk.B1AZP2	NA	RsLDRLDSVDmLLPSk	0.515626	4.09846	2.64514	3.48443	3.3863	2.75683	2.76692	3.87778	4.49689	3.54919	3.18527	3.41705	2.93384	3.98381	4.11051	4.30517	3.27224	3.95548	3.81263	4.14176	3.61521	[R].RSLDRLDSVDMLLPSK.[C]	1xPhospho [S2]; 1xOxidation [M11]; 1xTMTpro [K16]; 1xTMTpro [N-Term]	B1AZP2 [414-429]	B1AZP2 1xPhospho [S415]	1	______RsLDRLDSV	Dlgap4
B1AZP2	ANSWQLVEtPEkR.B1AZP2	2	ANSWQLVEtPEkR	0.000683398	6.80746	6.63479	6.79197	6.82995	6.64655	6.83554	7.21761	7.11544	7.13267	6.86307	6.64228	6.22182	6.86535	6.64284	6.85095	6.23983	6.26697	6.28297	6.4918	6.55297	[K].ANSWQLVETPEKR.[K]	1xPhospho [T9]; 1xTMTpro [K12]; 1xTMTpro [N-Term]	B1AZP2 [907-919]	B1AZP2 1xPhospho [T915]	1	NSWQLVEtPEKR___	Dlgap4
B2RUJ5	QDIsPTR.B2RUJ5	1	QDIsPTR	0.0183916	6.93527	6.90501	7.44317	6.85894	6.80117	6.67678	6.34719	6.65922	6.92386	6.8625	6.7695	7.03348	6.71061	6.80121	6.6515	6.57234	6.58885	6.07146	6.34031	6.67112	[R].QDISPTR.[D]	1xPhospho [S4]; 1xTMTpro [N-Term]	B2RUJ5 [388-394]	B2RUJ5 1xPhospho [S391]	1	____QDIsPTR____	Apba1
B2RUJ5	SDGESDsPEkEAEFAPYPR.B2RUJ5	2	SDGESDsPEkEAEFAPYPR	0.00287794	5.81404	5.78581	6.22693	6.05298	6.48491	6.34731	6.7508	7.15002	6.34993	6.63686	5.93681	5.94213	5.97049	6.03819	6.1392	5.94	5.8989	5.98658	6.20929	6.14613	[R].SDGESDSPEKEAEFAPYPR.[M]	1xPhospho [S7]; 1xTMTpro [K10]; 1xTMTpro [N-Term]	B2RUJ5 [246-264]	B2RUJ5 1xPhospho [S252]	1	_SDGESDsPEKEAEF	Apba1
B2RUJ5	SNsQENVEASHPSQDGk.B2RUJ5	2	SNsQENVEASHPSQDGk	6.22e-05	6.24894	6.08746	6.46834	5.87391	5.77937	6.54389	7.0319	7.09585	7.3627	6.98534	6.36485	5.91419	6.4498	6.89762	6.52428	5.6242	5.92595	5.67063	5.57992	5.75615	[R].SNSQENVEASHPSQDGK.[R]	1xPhospho [S3]; 1xTMTpro [K17]; 1xTMTpro [N-Term]	B2RUJ5 [571-587]	B2RUJ5 1xPhospho [S573]	1	_____SNsQENVEAS	Apba1
B2RUJ5	VVGtPGGSEVGQR.B2RUJ5	1	VVGtPGGSEVGQR	0.000399371	5.91701	6.25739	6.73539	6.33328	6.66809	5.74443	5.30323	5.22388	5.85159	5.81519	5.92402	5.81068	5.24943	5.75861	5.53466	5.2474	5.38556	5.2361	5.45855	5.52619	[R].VVGTPGGSEVGQR.[Y]	1xPhospho [T4]; 1xTMTpro [N-Term]	B2RUJ5 [330-342]	B2RUJ5 1xPhospho [T333]	1	____VVGtPGGSEVG	Apba1
B2RUJ5	SPYtPDEPkEPIWVmR.B2RUJ5	2	SPYtPDEPkEPIWVmR	0.000677256	8.14655	7.90585	8.2156	7.9397	8.13036	8.50942	8.55849	8.38655	8.57916	8.71752	8.39596	8.13939	8.07207	8.33052	8.43058	8.1727	8.18724	7.959	8.26242	8.24039	[R].SPYTPDEPKEPIWVMR.[Q]	1xPhospho [T4]; 1xOxidation [M15]; 1xTMTpro [K9]; 1xTMTpro [N-Term]	B2RUJ5 [372-387]	B2RUJ5 1xPhospho [T375]	1	____SPYtPDEPKEP	Apba1
B9EJA2	DVsPTSR.B9EJA2	NA	DVsPTSR	0.522317	5.85689	5.73757	5.86891	5.51062	4.85509	5.28384	5.39427	6.05144	5.72907	5.34282	5.49255	5.42447	5.97529	6.27437	6.148	5.35838	5.06837	5.25108	5.98172	5.93814	[R].DVSPTSR.[D]	1xPhospho [S3]; 1xTMTpro [N-Term]	B9EJA2 [470-476]	B9EJA2 1xPhospho [S472]	1	_____DVsPTSR___	Cttnbp2
D3YVF0	SSAIQmGtPELEk.D3YVF0	6	SSAIQmGtPELEk	0.0376559	5.69363	5.87117	6.17352	5.90189	6.24741	5.43248	5.39946	5.48873	5.76069	5.91731	5.42786	5.88422	5.95109	5.67554	5.84417	5.89776	6.02667	5.76078	6.06338	6.16089	[K].SSAIQMGTPELEK.[E]	1xPhospho [T8]; 1xOxidation [M6]; 1xTMTpro [K13]; 1xTMTpro [N-Term]	D3YVF0 [213-225]	D3YVF0 1xPhospho [T220]	1	SSAIQMGtPELEK__	Akap5
D3YVF0	GPVAAsPQk.D3YVF0	6	GPVAAsPQk	0.000153485	6.13495	5.74115	6.51445	6.2634	6.15742	5.48047	5.37631	5.66798	6.13632	5.95001	5.44578	6.24708	6.6006	6.39407	6.22611	7.51693	7.2429	7.01875	6.82542	7.09539	[K].GPVAASPQK.[E]	1xPhospho [S6]; 1xTMTpro [K9]; 1xTMTpro [N-Term]	D3YVF0 [17-25]	D3YVF0 1xPhospho [S22]	1	__GPVAAsPQK____	Akap5
D3YVF0	ASLLESSAAGsPR.D3YVF0	6	ASLLESSAAGsPR	0.0123269	7.9579	8.32305	8.20333	8.4823	8.5221	8.0744	7.63485	8.01396	8.07026	8.21351	8.32648	8.4157	8.89628	8.90985	8.20677	8.42903	8.494	8.38066	8.93752	8.89975	[R].ASLLESSAAGSPR.[S]	1xPhospho [S11]; 1xTMTpro [N-Term]	D3YVF0 [241-253]	D3YVF0 1xPhospho [S251]	1	LESSAAGsPR_____	Akap5
D3YVF0	GPVAAsPQkER.D3YVF0	6	GPVAAsPQkER	0.00546052	6.31083	6.02867	6.65564	6.63817	6.86725	5.67893	5.84113	6.19774	6.48362	6.63907	5.73068	6.25163	6.52803	6.43324	6.3231	7.03472	7.33479	6.88088	6.91731	6.9142	[K].GPVAASPQKER.[Q]	1xPhospho [S6]; 1xTMTpro [K9]; 1xTMTpro [N-Term]	D3YVF0 [17-27]	D3YVF0 1xPhospho [S22]	1	__GPVAAsPQKER__	Akap5
D3YXK2	APTAALsPEPQDSkEDVk.D3YXK2	6	APTAALsPEPQDSkEDVk	0.00313486	6.36142	6.26089	6.77204	6.75924	6.56938	5.79492	5.81706	5.49654	6.02474	6.08621	5.94117	5.62421	6.26536	6.14077	5.99727	5.72588	6.15014	5.93676	6.33893	6.17721	[R].APTAALSPEPQDSKEDVK.[K]	1xPhospho [S7]; 2xTMTpro [K14; K18]; 1xTMTpro [N-Term]	D3YXK2 [360-377]	D3YXK2 1xPhospho [S366]	1	_APTAALsPEPQDSK	Safb
D3YXK2	SEsPSTR.D3YXK2	6	SEsPSTR	0.00349956	6.87568	6.82406	7.03792	7.48387	6.85909	6.16461	6.18475	6.117	6.39481	6.4172	6.18567	5.95779	6.72421	6.72469	6.57216	6.0182	6.29635	6.52012	6.502	6.68889	[K].SESPSTR.[C]	1xPhospho [S3]; 1xTMTpro [N-Term]	D3YXK2 [296-302]	D3YXK2 1xPhospho [S298]	1	_____SEsPSTR___	Safb
D3YXK2	RLsEGR.D3YXK2	1	RLsEGR	0.000117551	6.62071	6.22474	6.38047	7.14922	6.5929	5.58859	5.71265	5.48531	5.84787	5.63018	5.25839	4.72869	5.88861	5.89837	5.38839	5.17782	5.15965	5.05613	5.4964	5.39525	[K].RLSEGR.[G]	1xPhospho [S3]; 1xTMTpro [N-Term]	D3YXK2 [827-832]	D3YXK2 1xPhospho [S829]	1	_____RLsEGR____	Safb
D3YZP9	LDQPVSAPPsPR.D3YZP9	2	LDQPVSAPPsPR	0.0585713	6.57339	6.40429	6.69285	7.10443	6.58816	6.42017	6.8051	7.10126	6.67535	6.45124	6.1002	6.19228	6.55431	6.68357	6.61959	6.30008	6.28903	6.25198	6.3732	6.25176	[K].LDQPVSAPPSPR.[D]	1xPhospho [S10]; 1xTMTpro [N-Term]	D3YZP9 [228-239]	D3YZP9 1xPhospho [S237]	1	QPVSAPPsPR_____	Ccdc6
D3YZP9	RSSsPDk.D3YZP9	7	RSSsPDk	0.0500266	5.64985	5.33586	5.31209	5.47283	4.8824	5.61344	6.36609	6.62768	6.3462	5.90623	5.50466	4.71338	5.68619	6.37925	5.99444	5.52687	5.17815	5.26541	5.92256	5.67258	[R].RSSSPDK.[F]	1xPhospho [S4]; 1xTMTpro [K7]; 1xTMTpro [N-Term]	D3YZP9 [409-415]	D3YZP9 1xPhospho [S412]	1	____RSSsPDK____	Ccdc6
D3YZU1	RAPsPSLLPASDHk.D3YZU1	5	RAPsPSLLPASDHk	2.85e-06	5.75886	5.52867	5.67384	5.67485	5.70585	4.88544	4.90123	4.79523	4.83456	4.71431	4.61603	3.68147	4.82167	4.31009	4.13734	3.73305	4.16966	3.76122	4.43511	4.02195	[R].RAPSPSLLPASDHK.[V]	1xPhospho [S4]; 1xTMTpro [K14]; 1xTMTpro [N-Term]	D3YZU1 [2003-2016]	D3YZU1 1xPhospho [S2006]	1	____RAPsPSLLPAS	Shank1
E9PUL5	AHGGHPGsPR.E9PUL5	6	AHGGHPGsPR	5.92e-05	2.6179	3.58507	3.15168	3.7446	3.36918	2.64576	3.08063	3.36441	3.14704	2.82374	3.78337	4.05532	4.0808	4.6295	4.33869	4.07833	4.125	4.52847	4.69525	4.40873	[R].AHGGHPGSPR.[G]	1xPhospho [S8]; 1xTMTpro [N-Term]	E9PUL5 [237-246]	E9PUL5 1xPhospho [S244]	1	AHGGHPGsPR_____	Prrt2
E9Q3L2	RRsFNDFR.E9Q3L2	3	RRsFNDFR	2.81e-06	5.45114	5.63664	6.05781	6.06626	6.04568	5.66875	5.46041	5.6343	5.96717	5.93536	6.30068	6.24369	6.44483	6.63975	6.12109	6.89414	6.98238	7.21089	6.88716	7.00722	[R].RRSFNDFR.[S]	1xPhospho [S3]; 1xTMTpro [N-Term]	E9Q3L2 [231-238]	E9Q3L2 1xPhospho [S233]	1	_____RRsFNDFR__	Pi4ka
E9Q401	IAEDPSRDGPsPTSGSSk.E9Q401	3	IAEDPSRDGPsPTSGSSk	3.52e-07	5.91216	5.92084	6.60482	6.64684	6.76572	6.51828	6.81295	7.34908	6.92566	7.11528	7.77326	7.67429	7.6057	7.88997	8.2136	8.7264	8.68378	8.32239	8.56725	8.52161	[K].IAEDPSRDGPSPTSGSSK.[T]	1xPhospho [S11]; 1xTMTpro [K18]; 1xTMTpro [N-Term]	E9Q401 [2352-2369]	E9Q401 1xPhospho [S2362]	1	DPSRDGPsPTSGSSK	Ryr2
E9Q401	RIsQTSQVSIDAAHGYSPR.E9Q401	6	RIsQTSQVSIDAAHGYSPR	0.00443042	3.92999	4.184	4.41004	4.24327	4.7492	4.08363	3.54317	3.66388	3.8917	4.02846	4.05593	4.29059	4.13889	4.04325	4.53697	4.52766	4.32044	4.62632	4.48134	4.54048	[R].RISQTSQVSIDAAHGYSPR.[A]	1xPhospho [S3]; 1xTMTpro [N-Term]	E9Q401 [2805-2823]	E9Q401 1xPhospho [S2807]	1	_____RIsQTSQVSI	Ryr2
E9Q7G0	TQPDGTSVPGEPAsPISQR.E9Q7G0	6	TQPDGTSVPGEPAsPISQR	0.0517684	5.73064	5.85748	6.39535	6.14568	6.30128	5.46149	5.4608	5.45131	6.02617	5.81249	5.40466	6.19058	5.80952	5.74166	5.83694	5.94071	5.98405	6.06135	6.26883	5.96048	[R].TQPDGTSVPGEPASPISQR.[L]	1xPhospho [S14]; 1xTMTpro [N-Term]	E9Q7G0 [1726-1744]	E9Q7G0 1xPhospho [S1739]	1	SVPGEPAsPISQR__	Numa1
E9Q8I9	SSsPDLSSSSk.E9Q8I9	7	SSsPDLSSSSk	0.00531183	6.55624	6.656	6.73163	6.75221	6.71731	6.98536	6.99337	7.35006	7.4013	7.41563	6.79843	6.88163	7.48346	7.10411	7.37081	6.81672	6.86238	6.87029	6.80806	7.16018	[R].SSSPDLSSSSK.[L]	1xPhospho [S3]; 1xTMTpro [K11]; 1xTMTpro [N-Term]	E9Q8I9 [1938-1948]	E9Q8I9 1xPhospho [S1940]	1	_____SSsPDLSSSS	Fry
F6SEU4	FRsADHDR.F6SEU4	7	FRsADHDR	0.000175996	5.49728	5.27569	5.74215	5.70241	5.90269	6.52766	6.67756	6.86078	6.39304	6.75122	6.40356	6.29169	7.12652	7.40209	7.09822	6.1749	6.02147	5.8147	6.38189	6.32827	[R].FRSADHDR.[A]	1xPhospho [S3]; 1xTMTpro [N-Term]	F6SEU4 [163-170]	F6SEU4 1xPhospho [S165]	1	_____FRsADHDR__	Syngap1
F6SEU4	QQsLSk.F6SEU4	NA	QQsLSk	0.578182	7.13896	6.91438	7.1933	7.16513	7.15228	6.95199	7.38367	7.20033	7.6243	7.40625	6.79725	6.78095	7.91355	7.21304	7.18048	7.06434	6.80534	6.80146	7.46322	7.09106	[R].QQSLSK.[E]	1xPhospho [S3]; 1xTMTpro [K6]; 1xTMTpro [N-Term]	F6SEU4 [1103-1108]	F6SEU4 1xPhospho [S1105]	1	_____QQsLSK____	Syngap1
F6ZDS4	QTPQAPQsPR.F6ZDS4	6	QTPQAPQsPR	0.0427562	5.92498	6.02673	5.46491	6.49479	6.17274	5.28553	5.04439	5.08736	5.53408	5.34492	5.29214	5.27484	6.06421	5.863	5.72641	5.2541	5.02579	5.4787	6.11926	5.91461	[R].QTPQAPQSPR.[R]	1xPhospho [S8]; 1xTMTpro [N-Term]	F6ZDS4 [2134-2143]	F6ZDS4 1xPhospho [S2141]	1	QTPQAPQsPR_____	Tpr
G5E8K5	RQsFASLALR.G5E8K5	3	RQsFASLALR	8.98e-06	6.05602	6.0841	5.6508	5.66906	6.02793	6.36126	6.24585	6.23978	6.85253	6.64528	6.50143	7.05651	7.55225	7.16463	7.72143	7.79161	7.47681	7.35141	8.1919	7.90022	[R].RQSFASLALR.[K]	1xPhospho [S3]; 1xTMTpro [N-Term]	G5E8K5 [1449-1458]	G5E8K5 1xPhospho [S1451]	1	_____RQsFASLALR	Ank3
G5E8K5	TEEPVsPLTAYQk.G5E8K5	3	TEEPVsPLTAYQk	4.97e-05	5.67785	5.67153	5.72234	6.03898	5.66654	5.87723	6.1719	6.5956	6.3419	6.23288	6.50762	6.09578	6.76416	6.65765	6.3678	7.01919	7.02972	6.76155	7.90071	7.63988	[R].TEEPVSPLTAYQK.[S]	1xPhospho [S6]; 1xTMTpro [K13]; 1xTMTpro [N-Term]	G5E8K5 [1878-1890]	G5E8K5 1xPhospho [S1883]	1	__TEEPVsPLTAYQK	Ank3
O08539	VNHEPEPASGASPGATIPksPSQLR.O08539	NA	VNHEPEPASGASPGATIPksPSQLR	0.267068	6.6911	6.76532	6.94108	7.01777	6.99335	6.74544	6.47844	6.52698	6.60175	6.87144	6.66723	6.47826	6.79442	6.42649	7.13297	6.70962	6.53252	6.72655	6.63886	6.83188	[R].VNHEPEPASGASPGATIPKSPSQLR.[K]	1xPhospho [S20]; 1xTMTpro [K19]; 1xTMTpro [N-Term]	O08539 [313-337]	O08539 1xPhospho [S332]	1	PGATIPKsPSQLR__	Bin1
O08539	GNksPsPPPDGSPAATPEIR.O08539	4	GNksPsPPPDGSPAATPEIR	0.0127841	6.34982	6.2416	6.51972	6.36624	6.46696	6.37768	6.56672	6.84462	6.87312	6.5931	6.64098	6.62435	6.869	6.90384	7.36862	6.6963	6.77346	6.67012	6.93677	6.73424	[K].GNKSPSPPPDGSPAATPEIR.[V]	2xPhospho [S4; S6]; 1xTMTpro [K3]; 1xTMTpro [N-Term]	O08539 [293-312]	O08539 2xPhospho [S296; S298]	2	____GNKsPsPPPDG	Bin1
O08553	NLHQSGFSLsGAQIDDNIPR.O08553	1	NLHQSGFSLsGAQIDDNIPR	0.000952745	7.11622	7.14409	6.94852	6.83843	7.11026	6.91906	6.32109	5.96599	6.60701	6.67158	6.28668	6.47546	6.42564	6.33725	6.33923	6.37258	6.15739	5.82426	6.4723	6.32869	[R].NLHQSGFSLSGAQIDDNIPR.[R]	1xPhospho [S10]; 1xTMTpro [N-Term]	O08553 [533-552]	O08553 1xPhospho [S542]	1	HQSGFSLsGAQIDDN	Dpysl2
O08553	GLYDGPVcEVSVtPk.O08553	5	GLYDGPVcEVSVtPk	0.000788184	7.07831	6.93384	7.30117	7.17323	6.83528	7.01676	7.37035	6.9975	7.38277	7.26534	6.54006	6.40187	6.583	6.49504	6.67859	7.33482	6.9065	6.75415	7.36945	7.2785	[R].GLYDGPVCEVSVTPK.[T]	1xCarbamidomethyl [C8]; 1xPhospho [T13]; 1xTMTpro [K15]; 1xTMTpro [N-Term]	O08553 [497-511]	O08553 1xPhospho [T509]	1	PVCEVSVtPK_____	Dpysl2
O08553	TsPAkQQAPPVR.O08553	5	TsPAkQQAPPVR	0.00223117	9.8178	9.35379	9.88071	9.87019	9.35467	9.53168	10.0368	9.50327	9.47212	9.8165	9.02483	8.37204	9.09901	9.02411	9.30207	9.27449	9.20381	8.83091	9.14152	9.22378	[K].TSPAKQQAPPVR.[N]	1xPhospho [S2]; 1xTMTpro [K5]; 1xTMTpro [N-Term]	O08553 [521-532]	O08553 1xPhospho [S522]	1	______TsPAKQQAP	Dpysl2
O08715	RLsEEAcPGVLSVAPTVTQPPGREEQR.O08715	1	RLsEEAcPGVLSVAPTVTQPPGREEQR	0.00233404	6.74243	6.76521	6.66192	7.01169	7.00691	6.61571	6.28955	6.07516	6.47304	6.53257	6.29445	6.25973	6.61234	6.34921	6.46762	6.27881	6.22963	6.40116	6.59174	6.37524	[R].RLSEEACPGVLSVAPTVTQPPGREEQR.[C]	1xCarbamidomethyl [C7]; 1xPhospho [S3]; 1xTMTpro [N-Term]	O08715 [53-79]	O08715 1xPhospho [S55]	1	_____RLsEEACPGV	Akap1
O08784	kLsGDLEAGAPk.O08784	NA	kLsGDLEAGAPk	0.113517	6.12679	6.28905	6.72744	6.76376	6.63468	5.79812	6.25936	5.97037	6.2445	6.25719	6.14925	5.84342	6.12193	6.4058	6.54118	6.16589	6.10387	6.39417	6.09015	6.46562	[R].KLSGDLEAGAPK.[N]	1xPhospho [S3]; 2xTMTpro [K1; K12]; 1xTMTpro [N-Term]	O08784 [1189-1200]	O08784 1xPhospho [S1191]	1	_____KLsGDLEAGA	Tcof1
O08784	ASAVsPEkAPmTSk.O08784	1	ASAVsPEkAPmTSk	0.000151558	7.72689	7.7414	8.22787	8.09461	8.01606	6.9556	7.20139	7.27055	7.27806	7.57191	7.13993	7.16933	7.3529	7.57042	7.46329	7.21148	7.14508	7.40484	7.2849	7.27966	[R].ASAVSPEKAPMTSK.[A]	1xPhospho [S5]; 1xOxidation [M11]; 2xTMTpro [K8; K14]; 1xTMTpro [N-Term]	O08784 [1212-1225]	O08784 1xPhospho [S1216]	1	___ASAVsPEKAPMT	Tcof1
O08919	RTPsEAER.O08919	4	RTPsEAER	0.000234259	6.22481	6.40563	6.26291	5.22166	5.71968	6.98855	7.68042	8.06966	7.94904	7.46079	7.44464	6.88918	8.18937	8.22193	8.45498	8.04518	7.63633	7.13449	8.4593	8.25502	[K].RTPSEAER.[W]	1xPhospho [S4]; 1xTMTpro [N-Term]	O08919 [408-415]	O08919 1xPhospho [S411]	1	____RTPsEAER___	Numbl
O08919	QLsLRLNELPSTLQR.O08919	NA	QLsLRLNELPSTLQR	0.60534	5.63955	5.83141	6.67422	6.43567	6.88017	6.31374	5.35603	4.52728	6.14273	6.80867	6.15548	6.88504	5.6989	5.47655	5.56344	5.67851	5.93174	6.26382	5.45896	5.63967	[R].QLSLRLNELPSTLQR.[R]	1xPhospho [S3]; 1xTMTpro [N-Term]	O08919 [322-336]	O08919 1xPhospho [S324]	1	_____QLsLRLNELP	Numbl
O35099	LSALSTGsNEYLR.O35099	NA	LSALSTGsNEYLR	0.219673	5.59951	5.76767	6.08841	5.73137	5.9811	6.04879	5.81461	5.93652	6.1946	6.16344	6.07909	6.11321	5.99603	6.16965	6.02005	5.75793	5.91713	5.93833	6.40729	6.13734	[K].LSALSTGSNEYLR.[S]	1xPhospho [S8]; 1xTMTpro [N-Term]	O35099 [958-970]	O35099 1xPhospho [S965]	1	LSALSTGsNEYLR__	Map3k5
O35495	RVHsENNAcINFk.O35495	NA	RVHsENNAcINFk	0.156255	5.4897	5.57928	6.09245	6.2924	6.40392	5.9763	5.54565	5.63684	6.022	6.21289	6.12822	6.3897	5.85099	6.29458	6.26398	6.35922	6.10879	6.3925	6.35706	6.16197	[K].RVHSENNACINFK.[S]	1xCarbamidomethyl [C9]; 1xPhospho [S4]; 1xTMTpro [K13]; 1xTMTpro [N-Term]	O35495 [92-104]	O35495 1xPhospho [S95]	1	____RVHsENNACIN	Cdk14
O35495	SSSAGkEsPkVR.O35495	3	SSSAGkEsPkVR	5.32e-08	6.19591	6.03216	6.37069	6.29848	6.32506	6.82113	6.662	6.74246	7.03493	7.24363	7.54059	7.49412	7.54484	7.85236	7.56205	7.638	7.69742	7.7372	8.08895	8.04492	[K].SSSAGKESPKVR.[R]	1xPhospho [S8]; 2xTMTpro [K6; K10]; 1xTMTpro [N-Term]	O35495 [105-116]	O35495 1xPhospho [S112]	1	SSSAGKEsPKVR___	Cdk14
O35526	TAkDsDDDDDVTVTVDR.O35526	3	TAkDsDDDDDVTVTVDR	1.85e-05	5.48104	5.70806	6.40732	6.08968	6.33645	5.70478	6.049	6.78608	6.52024	6.47925	6.6002	7.22181	7.16284	7.25333	7.46521	7.72938	7.82941	7.42547	7.64755	7.72729	[R].TAKDSDDDDDVTVTVDR.[D]	1xPhospho [S5]; 1xTMTpro [K3]; 1xTMTpro [N-Term]	O35526 [10-26]	O35526 1xPhospho [S14]	1	___TAKDsDDDDDVT	Stx1a
O35526	TAkDsDDDDDVTVTVDRDR.O35526	3	TAkDsDDDDDVTVTVDRDR	7.65e-06	6.75208	6.91142	7.16811	7.58305	7.46384	7.11114	7.33253	7.83027	7.34003	7.45477	7.66381	7.78015	8.10969	8.13079	8.4341	8.78289	8.78903	8.374	8.93863	8.84669	[R].TAKDSDDDDDVTVTVDRDR.[F]	1xPhospho [S5]; 1xTMTpro [K3]; 1xTMTpro [N-Term]	O35526 [10-28]	O35526 1xPhospho [S14]	1	___TAKDsDDDDDVT	Stx1a
O35551	RAQsTDSLGTSSSLQSk.O35551	6	RAQsTDSLGTSSSLQSk	0.073898	7.29724	7.26729	6.85355	7.33322	7.3333	7.06639	6.9243	6.74681	6.92795	7.15953	7.1041	7.33529	7.02982	7.17369	7.13462	7.19071	7.10426	7.20635	7.22119	7.17693	[R].RAQSTDSLGTSSSLQSK.[A]	1xPhospho [S4]; 1xTMTpro [K17]; 1xTMTpro [N-Term]	O35551 [404-420]	O35551 1xPhospho [S407]	1	____RAQsTDSLGTS	Rabep1
O35607	SVsPTVNPmSTAmQNER.O35607	NA	SVsPTVNPmSTAmQNER	0.98708	6.80582	6.83185	7.22155	7.35217	7.20559	6.96666	7.06183	7.17299	7.20428	7.17369	6.75407	7.14305	7.15945	7.12419	7.34156	7.04749	7.09804	7.01237	7.182	7.28166	[K].SVSPTVNPMSTAMQNER.[N]	1xPhospho [S3]; 2xOxidation [M9; M13]; 1xTMTpro [N-Term]	O35607 [513-529]	O35607 1xPhospho [S515]	1	_____SVsPTVNPMS	Bmpr2
O35607	LNINSsPDEHEPLLR.O35607	2	LNINSsPDEHEPLLR	0.0424105	6.9136	6.68637	6.7309	6.8537	6.76005	6.75778	7.42123	7.66857	7.53953	6.99548	6.515	6.57627	7.03514	7.11573	7.35395	6.53071	6.75182	6.55054	6.9278	6.85343	[R].LNINSSPDEHEPLLR.[R]	1xPhospho [S6]; 1xTMTpro [N-Term]	O35607 [858-872]	O35607 1xPhospho [S863]	1	__LNINSsPDEHEPL	Bmpr2
O35609	kLsPTEPR.O35609	3	kLsPTEPR	1.16e-05	8.40201	8.5905	8.44653	8.52683	8.50577	8.86181	8.81896	8.8952	9.07396	9.24816	9.2421	9.02694	9.4977	9.73572	9.54526	9.45599	9.28842	9.39633	9.83009	9.66951	[R].KLSPTEPR.[N]	1xPhospho [S3]; 1xTMTpro [K1]; 1xTMTpro [N-Term]	O35609 [76-83]	O35609 1xPhospho [S78]	1	_____KLsPTEPR__	Scamp3
O35681	GLSEkENsE.O35681	3	GLSEkENsE	1.62e-05	7.56285	7.53522	7.69569	7.57398	7.48826	8.12157	8.31704	8.41098	8.34106	8.49076	8.49023	8.0403	8.83376	8.8111	9.00197	9.03667	8.57881	8.48119	8.94623	8.959	[K].GLSEKENSE.[-]	1xPhospho [S8]; 1xTMTpro [K5]; 1xTMTpro [N-Term]	O35681 [579-587]	O35681 1xPhospho [S586]	1	GLSEKENsE______	Syt3
O35691	ESRQEsDPEDDDVkkPALQSSVVATSk.O35691	1	ESRQEsDPEDDDVkkPALQSSVVATSk	0.00421912	7.48462	6.92922	7.2161	7.23316	7.2038	6.79924	6.73611	6.39366	6.72758	6.7747	6.46957	6.18141	6.96471	6.50573	6.87382	6.28389	6.08896	6.22216	6.63128	6.96282	[R].ESRQESDPEDDDVKKPALQSSVVATSK.[E]	1xPhospho [S6]; 3xTMTpro [K14; K15; K27]; 1xTMTpro [N-Term]	O35691 [95-121]	O35691 1xPhospho [S100]	1	__ESRQEsDPEDDDV	Pnn
O35691	EAGIVHsDAEk.O35691	1	EAGIVHsDAEk	1.63e-05	7.11836	6.70486	6.96254	7.49382	7.05064	5.84062	5.54669	5.69167	5.9446	6.12365	5.62712	5.95317	5.93377	5.97893	5.71297	5.99467	5.86715	6.40273	5.76842	6.5285	[K].EAGIVHSDAEK.[E]	1xPhospho [S7]; 1xTMTpro [K11]; 1xTMTpro [N-Term]	O35691 [340-350]	O35691 1xPhospho [S346]	1	_EAGIVHsDAEK___	Pnn
O35927	NSSLsPGLNTSNGDGSETETTSAILASVk.O35927	2	NSSLsPGLNTSNGDGSETETTSAILASVk	0.0293407	3.80974	3.02627	4.50714	4.18809	4.38824	3.71005	4.66859	4.76882	4.82069	4.74351	4.00607	3.30537	4.24484	4.24362	3.98614	3.3426	3.49272	3.18287	3.89798	3.68492	[K].NSSLSPGLNTSNGDGSETETTSAILASVK.[E]	1xPhospho [S5]; 1xTMTpro [K29]; 1xTMTpro [N-Term]	O35927 [28-56]	O35927 1xPhospho [S32]	1	___NSSLsPGLNTSN	Ctnnd2
O35927	ALQsPEHHIDPIYEDR.O35927	8	ALQsPEHHIDPIYEDR	0.0569077	7.92167	7.93741	7.96434	7.99752	8.0053	7.94213	7.92397	7.84307	8.16071	8.20029	7.96377	7.90911	8.08657	8.27378	8.05184	7.80346	7.71936	7.808	7.90929	7.9387	[R].ALQSPEHHIDPIYEDR.[V]	1xPhospho [S4]; 1xTMTpro [N-Term]	O35927 [409-424]	O35927 1xPhospho [S412]	1	____ALQsPEHHIDP	Ctnnd2
O35927	TGsQHGPQNAAAATFQR.O35927	5	TGsQHGPQNAAAATFQR	0.00242707	6.71539	6.7982	6.77283	6.79993	7.03832	6.54113	6.31578	5.83615	6.96333	6.89454	6.22634	6.56953	6.35664	6.26265	6.38821	6.12671	6.09259	6.02056	5.95175	5.91608	[R].TGSQHGPQNAAAATFQR.[A]	1xPhospho [S3]; 1xTMTpro [N-Term]	O35927 [469-485]	O35927 1xPhospho [S471]	1	_____TGsQHGPQNA	Ctnnd2
O35927	GGSPLTTTQGGsPTkLQR.O35927	8	GGSPLTTTQGGsPTkLQR	0.0875569	7.00695	7.01943	7.11852	6.94084	7.60414	6.98646	6.36436	6.1142	6.90773	7.43689	6.99544	7.31896	7.0225	6.8548	6.82284	6.54148	6.63638	6.79991	6.39427	6.6062	[R].GGSPLTTTQGGSPTKLQR.[G]	1xPhospho [S12]; 1xTMTpro [K15]; 1xTMTpro [N-Term]	O35927 [262-279]	O35927 1xPhospho [S273]	1	LTTTQGGsPTKLQR_	Ctnnd2
O35927	SLsQSQGDPLPPAHTGTFR.O35927	6	SLsQSQGDPLPPAHTGTFR	0.0606064	4.54957	4.61309	5.14579	4.8467	5.06027	4.47475	4.41124	4.10616	4.67081	4.64376	4.58664	4.78632	4.88031	4.77658	4.54043	4.56309	4.70607	4.77473	4.8841	4.73193	[R].SLSQSQGDPLPPAHTGTFR.[T]	1xPhospho [S3]; 1xTMTpro [N-Term]	O35927 [433-451]	O35927 1xPhospho [S435]	1	_____SLsQSQGDPL	Ctnnd2
O35927	EmIsLkER.O35927	NA	EmIsLkER	0.368414	7.15527	6.77046	6.99342	6.77273	7.14364	7.06874	7.09232	6.26183	7.50566	7.20975	6.33554	7.05182	7.06303	6.73972	7.06857	6.95739	6.72792	6.36796	6.87186	6.38342	[R].EMISLKER.[K]	1xPhospho [S4]; 1xOxidation [M2]; 1xTMTpro [K6]; 1xTMTpro [N-Term]	O35927 [1101-1108]	O35927 1xPhospho [S1104]	1	____EMIsLKER___	Ctnnd2
O35927	TPSIsPVR.O35927	4	TPSIsPVR	0.00428155	7.46198	7.36408	7.86285	7.4784	7.19195	7.58608	8.07017	8.47222	8.01571	7.9766	7.96457	7.71596	8.30851	8.36146	8.58151	8.19904	8.20072	7.91998	8.37427	8.35042	[R].TPSISPVR.[V]	1xPhospho [S5]; 1xTMTpro [N-Term]	O35927 [1078-1085]	O35927 1xPhospho [S1082]	1	___TPSIsPVR____	Ctnnd2
O35927	GGsAPEGAAYAAPR.O35927	NA	GGsAPEGAAYAAPR	0.667999	6.18701	6.19597	6.50351	6.7331	6.8494	6.82331	6.51923	6.17661	6.71431	6.68112	6.44307	6.90835	6.85351	6.59376	6.50334	6.21247	6.62634	6.63088	6.54816	6.44353	[R].GGSAPEGAAYAAPR.[G]	1xPhospho [S3]; 1xTMTpro [N-Term]	O35927 [280-293]	O35927 1xPhospho [S282]	1	_____GGsAPEGAAY	Ctnnd2
O35954	SSTEARPGTSTAGTPDGPEAPPGPDAsPDASFGk.O35954	4	SSTEARPGTSTAGTPDGPEAPPGPDAsPDASFGk	0.000321417	4.11805	3.70897	3.84809	4.16224	4.34179	4.18443	4.58431	4.96715	4.7396	4.71386	4.51147	4.54838	5.13837	4.89658	5.13035	5.11994	5.05134	4.82905	4.94881	5.0179	[K].SSTEARPGTSTAGTPDGPEAPPGPDASPDASFGK.[Q]	1xPhospho [S27]; 1xTMTpro [K34]; 1xTMTpro [N-Term]	O35954 [274-307]	O35954 1xPhospho [S300]	1	APPGPDAsPDASFGK	Pitpnm1
O35954	AsPEPSALPAQR.O35954	5	AsPEPSALPAQR	0.000980292	5.80613	5.8894	6.10321	6.1403	6.14704	5.71143	6.10685	6.32804	6.0689	5.89816	5.83102	5.59845	5.86162	5.72939	5.39414	4.89049	5.27107	5.3187	5.61593	5.55622	[R].ASPEPSALPAQR.[T]	1xPhospho [S2]; 1xTMTpro [N-Term]	O35954 [620-631]	O35954 1xPhospho [S621]	1	______AsPEPSALP	Pitpnm1
O35954	WNsNDFIDAFASPTEVEGVPDPTVmATk.O35954	7	WNsNDFIDAFASPTEVEGVPDPTVmATk	0.0876048	2.78533	3.03288	3.63633	3.29011	2.64112	3.40777	4.07375	3.98104	3.68187	3.54452	3.08814	2.91093	4.06734	3.8031	3.51961	3.36319	3.1512	2.34914	3.27013	3.4948	[K].WNSNDFIDAFASPTEVEGVPDPTVMATK.[G]	1xPhospho [S3]; 1xOxidation [M25]; 1xTMTpro [K28]; 1xTMTpro [N-Term]	O35954 [371-398]	O35954 1xPhospho [S373]	1	_____WNsNDFIDAF	Pitpnm1
O54774	NAEAVksPEkEGVLGVEk.O54774	4	NAEAVksPEkEGVLGVEk	0.000594292	5.8555	5.82144	6.03403	5.88703	6.01624	5.85823	6.5815	7.27567	7.16151	6.8634	7.01946	6.69074	7.11961	7.14945	7.4462	7.21325	6.9487	6.65042	7.12954	6.94428	[R].NAEAVKSPEKEGVLGVEK.[K]	1xPhospho [S7]; 3xTMTpro [K6; K10; K18]; 1xTMTpro [N-Term]	O54774 [819-836]	O54774 1xPhospho [S825]	1	_NAEAVKsPEKEGVL	Ap3d1
O54829	SHsPTHTPTPETkPPTEDELHQQIk.O54829	3	SHsPTHTPTPETkPPTEDELHQQIk	4.31e-05	3.94976	4.07729	4.29786	4.26097	4.27955	4.74165	4.22451	4.2261	4.27416	4.84744	4.80153	4.96633	5.20681	5.01496	5.08699	5.38246	5.23874	4.79127	5.30966	5.68616	[R].SHSPTHTPTPETKPPTEDELHQQIK.[Y]	1xPhospho [S3]; 2xTMTpro [K13; K25]; 1xTMTpro [N-Term]	O54829 [239-263]	O54829 1xPhospho [S241]	1	_____SHsPTHTPTP	Rgs7
O55017	AkEVAEVsPmSAANISIAAR.O55017	6	AkEVAEVsPmSAANISIAAR	0.0167328	6.56863	6.62501	6.50629	6.49828	7.06104	6.53111	6.48367	6.46661	6.81679	6.97867	6.6415	7.03836	6.84222	7.00496	7.18214	6.9195	7.09007	7.11424	6.98534	7.17667	[K].AKEVAEVSPMSAANISIAAR.[Q]	1xPhospho [S8]; 1xOxidation [M10]; 1xTMTpro [K2]; 1xTMTpro [N-Term]	O55017 [738-757]	O55017 1xPhospho [S745]	1	AKEVAEVsPMSAANI	Cacna1b
O55017	ESLsWGTQR.O55017	4	ESLsWGTQR	0.208031	4.79777	4.8753	5.80071	5.47806	5.02547	4.7629	5.1078	5.49086	5.17895	5.21597	5.41381	4.96842	5.16594	5.79214	5.48325	5.87002	5.41551	5.3651	6.05466	5.32982	[K].ESLSWGTQR.[T]	1xPhospho [S4]; 1xTMTpro [N-Term]	O55017 [1926-1934]	O55017 1xPhospho [S1929]	1	____ESLsWGTQR__	Cacna1b
O55017	RSHskETPGADTQVR.O55017	3	RSHskETPGADTQVR	0.000119863	5.50039	5.48982	5.37538	5.78804	5.97381	5.94323	5.66566	5.87215	6.18573	6.30949	6.50621	6.29804	6.49598	6.64591	6.43304	6.37545	6.49076	6.20608	6.89608	6.62104	[R].RSHSKETPGADTQVR.[C]	1xPhospho [S4]; 1xTMTpro [K5]; 1xTMTpro [N-Term]	O55017 [889-903]	O55017 1xPhospho [S892]	1	____RSHsKETPGAD	Cacna1b
O55017	GsPEEATER.O55017	6	GsPEEATER	7.58e-05	3.54222	3.81685	4.08627	4.64694	4.78079	3.32427	2.91996	3.32664	3.82596	3.95717	5.62469	5.20493	4.08524	4.76227	4.83337	6.67428	5.11356	5.92806	5.71637	5.76875	[R].GSPEEATER.[E]	1xPhospho [S2]; 1xTMTpro [N-Term]	O55017 [914-922]	O55017 1xPhospho [S915]	1	______GsPEEATER	Cacna1b
O55017	GLsEHNALLQkEPLSQPLAPGSR.O55017	NA	GLsEHNALLQkEPLSQPLAPGSR	0.161114	6.81092	6.68384	6.80184	7.31898	7.38134	6.61105	6.4127	5.63539	6.80019	7.09087	6.61746	7.00496	6.72455	6.52779	6.75205	6.73206	6.59502	6.59414	6.51016	6.32286	[R].GLSEHNALLQKEPLSQPLAPGSR.[I]	1xPhospho [S3]; 1xTMTpro [K11]; 1xTMTpro [N-Term]	O55017 [2219-2241]	O55017 1xPhospho [S2221]	1	_____GLsEHNALLQ	Cacna1b
O55017	RGsPEEATEREPR.O55017	3	RGsPEEATEREPR	0.0225848	3.9677	4.05298	4.21692	4.3376	3.96776	3.87965	4.00428	4.13756	4.33212	4.92712	4.47095	4.40558	4.37682	4.9663	4.61084	4.37677	4.54303	4.76418	5.08183	4.82339	[R].RGSPEEATEREPR.[R]	1xPhospho [S3]; 1xTMTpro [N-Term]	O55017 [913-925]	O55017 1xPhospho [S915]	1	_____RGsPEEATER	Cacna1b
O55017	GLsEHNALLQk.O55017	3	GLsEHNALLQk	0.00578903	6.50328	5.97279	6.02549	5.90374	5.98976	6.00419	6.4029	5.97267	6.74465	6.50139	6.50697	6.44196	7.12744	6.81052	7.31765	7.11286	6.65464	6.39404	7.41389	7.08736	[R].GLSEHNALLQK.[E]	1xPhospho [S3]; 1xTMTpro [K11]; 1xTMTpro [N-Term]	O55017 [2219-2229]	O55017 1xPhospho [S2221]	1	_____GLsEHNALLQ	Cacna1b
O55017	IGsDPYLGQR.O55017	3	IGsDPYLGQR	0.00165646	7.54335	7.73483	7.8226	8.04552	7.87828	7.69678	7.34669	7.5272	7.83723	8.00427	8.44928	8.06079	8.15629	8.28191	8.06996	8.29229	7.94685	8.16568	8.36613	8.383	[R].IGSDPYLGQR.[L]	1xPhospho [S3]; 1xTMTpro [N-Term]	O55017 [2242-2251]	O55017 1xPhospho [S2244]	1	_____IGsDPYLGQR	Cacna1b
O55106	FLESAAADVsDEDEDEDTDGRAk.O55106	NA	FLESAAADVsDEDEDEDTDGRAk	0.411933	6.85359	6.49295	7.1008	7.12478	6.8611	7.12316	7.02044	5.72159	6.75265	7.00766	7.20395	5.476	6.23898	6.71572	6.25526	6.39679	6.83071	6.7801	6.73343	6.94767	[K].FLESAAADVSDEDEDEDTDGRAK.[S]	1xPhospho [S10]; 1xTMTpro [K23]; 1xTMTpro [N-Term]	O55106 [236-258]	O55106 1xPhospho [S245]	1	ESAAADVsDEDEDED	Strn
O55106	FLESAAADVsDEDEDEDTDGR.O55106	NA	FLESAAADVsDEDEDEDTDGR	0.735884	4.69265	4.76233	4.81106	4.5078	4.36285	3.75587	4.86861	4.16268	4.72764	4.57577	4.45685	4.43492	4.7302	4.78692	3.86715	4.29931	4.3467	3.96333	4.55271	4.83232	[K].FLESAAADVSDEDEDEDTDGR.[A]	1xPhospho [S10]; 1xTMTpro [N-Term]	O55106 [236-256]	O55106 1xPhospho [S245]	1	ESAAADVsDEDEDED	Strn
O55131	IYEFPEtDDEEENkLVk.O55131	4	IYEFPEtDDEEENkLVk	0.0670626	4.82698	5.16904	5.42278	5.28331	5.11489	5.08127	5.46734	5.32707	5.4062	5.43023	5.35147	5.01672	5.38939	5.50551	5.69486	5.73802	5.26896	5.47404	5.84671	5.59359	[K].IYEFPETDDEEENKLVK.[K]	1xPhospho [T7]; 2xTMTpro [K14; K17]; 1xTMTpro [N-Term]	O55131 [221-237]	O55131 1xPhospho [T227]	1	_IYEFPEtDDEEENK	Septin7
O55201	DVTNLTVGGFTPmsPR.O55201	NA	DVTNLTVGGFTPmsPR	0.398901	4.87073	4.57555	5.22256	5.03549	5.14068	4.64294	4.81206	4.33149	4.98081	5.01325	4.4778	5.19797	4.65066	4.72596	4.77969	4.49154	4.36284	4.63618	4.90316	4.96585	[R].DVTNLTVGGFTPMSPR.[I]	1xPhospho [S14]; 1xOxidation [M13]; 1xTMTpro [N-Term]	O55201 [651-666]	O55201 1xPhospho [S664]	1	VGGFTPMsPR_____	Supt5h
O70161	RTQsSGQDGRPQEEPHAEDLQk.O70161	3	RTQsSGQDGRPQEEPHAEDLQk	1.09e-07	4.75546	4.67225	4.82371	4.93317	4.80989	5.29686	5.16225	5.31552	5.02053	5.87319	6.0431	6.01632	5.91803	6.26673	6.19285	6.93057	6.58747	6.55844	7.35877	7.20545	[R].RTQSSGQDGRPQEEPHAEDLQK.[I]	1xPhospho [S4]; 1xTMTpro [K22]; 1xTMTpro [N-Term]	O70161 [551-572]	O70161 1xPhospho [S554]	1	____RTQsSGQDGRP	Pip5k1c
O70161	SWVYSPLHYSARPASDGEsDT.O70161	6	SWVYSPLHYSARPASDGEsDT	0.00435827	6.39383	6.59382	6.30831	5.92845	6.21495	6.12086	6.08389	5.86159	6.43242	6.40922	6.12722	6.48669	6.65036	6.1802	6.62086	6.69556	6.68343	6.67998	7.08497	7.16652	[R].SWVYSPLHYSARPASDGESDT.[-]	1xPhospho [S19]; 1xTMTpro [N-Term]	O70161 [641-661]	O70161 1xPhospho [S659]	1	RPASDGEsDT_____	Pip5k1c
O70166	DAsLEELQk.O70166	7	DAsLEELQk	0.0287347	7.61151	7.25036	7.55894	7.62449	7.69951	7.82314	8.21501	8.48343	8.61118	8.45036	7.70335	7.31944	7.97246	8.44911	8.5947	7.84945	7.80609	7.59915	8.14119	8.11831	[K].DASLEELQK.[R]	1xPhospho [S3]; 1xTMTpro [K9]; 1xTMTpro [N-Term]	O70166 [79-87]	O70166 1xPhospho [S81]	1	_____DAsLEELQK_	Stmn3
O70166	RkDAsLEELQk.O70166	5	RkDAsLEELQk	0.00485587	7.72762	7.64066	7.71063	7.81852	7.89685	7.96479	8.13829	7.95167	8.16691	8.21101	7.54361	7.43705	7.74063	7.90005	8.00961	7.70107	7.40417	7.47282	7.77819	7.74379	[K].RKDASLEELQK.[R]	1xPhospho [S5]; 2xTMTpro [K2; K11]; 1xTMTpro [N-Term]	O70166 [77-87]	O70166 1xPhospho [S81]	1	___RKDAsLEELQK_	Stmn3
O70305	ALtPSIEAk.O70305	1	ALtPSIEAk	1.39e-05	6.48785	5.96501	5.49592	6.87583	6.2827	4.51552	4.2735	4.6753	4.39722	4.63634	4.57239	3.85688	5.5071	4.68703	3.75921	3.12359	3.72097	3.79467	3.90677	3.66986	[R].ALTPSIEAK.[D]	1xPhospho [T3]; 1xTMTpro [K9]; 1xTMTpro [N-Term]	O70305 [708-716]	O70305 1xPhospho [T710]	1	_____ALtPSIEAK_	Atxn2
O70433	YIsFEER.O70433	3	YIsFEER	2.31e-06	6.11551	6.021	6.35481	6.32739	6.30188	6.79086	6.6512	6.93405	6.79777	6.83749	7.42331	7.67551	8.23265	8.04213	7.59577	7.4535	7.58504	7.01537	8.03126	7.58329	[K].YISFEER.[Q]	1xPhospho [S3]; 1xTMTpro [N-Term]	O70433 [236-242]	O70433 1xPhospho [S238]	1	_____YIsFEER___	Fhl2
O70435	ESLkEEDEsDDDNm.O70435	6	ESLkEEDEsDDDNm	0.0062202	7.26378	7.09375	7.43333	7.49343	7.35086	6.95705	6.91921	6.77553	6.8501	7.04359	6.74053	6.75745	7.18475	6.80728	7.09752	7.03024	6.7901	6.86692	7.09269	7.25231	[K].ESLKEEDESDDDNM.[-]	1xPhospho [S9]; 1xOxidation [M14]; 1xTMTpro [K4]; 1xTMTpro [N-Term]	O70435 [242-255]	O70435 1xPhospho [S250]	1	SLKEEDEsDDDNM__	Psma3
O70439	TLNQLGtPQDSPELR.O70439	5	TLNQLGtPQDSPELR	3.22e-06	7.47815	7.46093	7.74034	7.45747	7.52975	6.97644	7.14868	6.96305	7.4183	7.37288	6.84268	6.66724	6.78623	6.86187	6.8291	6.59166	6.66917	6.66831	6.93221	6.67042	[R].TLNQLGTPQDSPELR.[Q]	1xPhospho [T7]; 1xTMTpro [N-Term]	O70439 [35-49]	O70439 1xPhospho [T41]	1	_TLNQLGtPQDSPEL	Stx7
O70443	QSSEEkEAARRsR.O70443	6	QSSEEkEAARRsR	0.0864815	4.78675	5.26752	5.72963	5.42774	5.61202	5.12411	4.16293	4.12564	4.74425	5.45212	4.6248	5.81721	5.43872	4.83192	4.56615	5.48038	5.23268	5.46504	5.53849	5.69955	[R].QSSEEKEAARRSR.[R]	1xPhospho [S12]; 1xTMTpro [K6]; 1xTMTpro [N-Term]	O70443 [5-17]	O70443 1xPhospho [S16]	1	EKEAARRsR______	Gnaz
O70589	FTSsPGLSTEDLkR.O70589	8	FTSsPGLSTEDLkR	0.00143387	7.70154	7.51531	7.70902	7.75192	7.70443	7.85672	8.00725	7.98988	8.17275	8.27293	8.23595	7.83789	7.96821	8.29398	8.26308	7.81362	7.84358	7.89838	7.90617	7.93606	[K].FTSSPGLSTEDLKR.[E]	1xPhospho [S4]; 1xTMTpro [K13]; 1xTMTpro [N-Term]	O70589 [48-61]	O70589 1xPhospho [S51]	1	____FTSsPGLSTED	Cask
O70589	DsPSTSR.O70589	1	DsPSTSR	0.00537554	5.73324	5.33882	5.79122	5.98322	5.14692	4.81555	4.86595	4.90379	4.79288	4.94391	4.66545	4.85872	4.19152	5.20381	4.85919	4.60514	4.38537	4.59942	4.10258	5.47957	[R].DSPSTSR.[Q]	1xPhospho [S2]; 1xTMTpro [N-Term]	O70589 [581-587]	O70589 1xPhospho [S582]	1	______DsPSTSR__	Cask
O88447	VDsPTVTTTLk.O88447	5	VDsPTVTTTLk	3.04e-06	6.80729	6.6411	6.91219	6.89111	6.41145	6.69667	6.95805	7.02869	7.17004	6.91854	6.03101	5.8879	6.33243	6.40823	6.36802	5.9053	5.92423	5.90614	5.93569	5.95409	[K].VDSPTVTTTLK.[N]	1xPhospho [S3]; 1xTMTpro [K11]; 1xTMTpro [N-Term]	O88447 [457-467]	O88447 1xPhospho [S459]	1	_____VDsPTVTTTL	Klc1
O88448	ASsLNFLNk.O88448	5	ASsLNFLNk	0.000547012	7.83699	7.7398	7.96888	7.66067	8.04317	7.75104	7.71836	7.28048	7.93308	7.93056	7.52481	7.39965	7.34821	7.31384	7.50308	7.44173	7.22353	7.26179	7.11594	7.2444	[R].ASSLNFLNK.[S]	1xPhospho [S3]; 1xTMTpro [K9]; 1xTMTpro [N-Term]	O88448 [573-581]	O88448 1xPhospho [S575]	1	_____ASsLNFLNK_	Klc2
O88448	SGsFGk.O88448	7	SGsFGk	0.00480277	8.65554	8.39843	8.69859	8.14894	8.1166	8.7342	9.22842	9.24434	9.31908	9.01387	8.47562	8.10985	8.85688	8.72169	8.94791	8.5853	8.30096	8.14361	8.57564	8.57499	[R].SGSFGK.[L]	1xPhospho [S3]; 1xTMTpro [K6]; 1xTMTpro [N-Term]	O88448 [537-542]	O88448 1xPhospho [S539]	1	_____SGsFGK____	Klc2
O88448	SGsFGkLR.O88448	NA	SGsFGkLR	0.130884	8.03036	8.53541	8.63184	8.90004	9.26158	8.45017	7.23251	6.21256	7.59517	8.89656	8.31277	8.55507	7.86891	7.54103	7.37103	7.69962	7.84701	8.16255	6.94452	7.95044	[R].SGSFGKLR.[D]	1xPhospho [S3]; 1xTMTpro [K6]; 1xTMTpro [N-Term]	O88448 [537-544]	O88448 1xPhospho [S539]	1	_____SGsFGKLR__	Klc2
O88448	RGsRDVAGPQSESDLEESGPAAEWSGDGSGSLR.O88448	NA	RGsRDVAGPQSESDLEESGPAAEWSGDGSGSLR	0.847822	3.51226	4.20942	3.73732	3.66179	4.37698	3.90727	4.06165	3.78249	4.04389	4.43188	3.7818	4.06668	3.72692	4.31738	3.9226	3.99478	4.03433	3.89584	3.85501	4.28724	[R].RGSRDVAGPQSESDLEESGPAAEWSGDGSGSLR.[R]	1xPhospho [S3]; 1xTMTpro [N-Term]	O88448 [503-535]	O88448 1xPhospho [S505]	1	_____RGsRDVAGPQ	Klc2
O88485	ANRADsEEEGAVELAA.O88485	1	ANRADsEEEGAVELAA	0.0233186	7.41332	7.63536	7.4578	7.31692	7.34231	7.37034	7.22487	6.89358	7.30312	7.39899	6.90761	7.09683	7.16305	7.11906	7.07754	6.87472	6.9793	7.01983	7.34063	7.32961	[R].ANRADSEEEGAVELAA.[-]	1xPhospho [S6]; 1xTMTpro [N-Term]	O88485 [613-628]	O88485 1xPhospho [S618]	1	__ANRADsEEEGAVE	Dync1i1
O88487	EAEALLQSmGLTTDSPIVPPPmsPSSk.O88487	NA	EAEALLQSmGLTTDSPIVPPPmsPSSk	0.766628	3.25541	3.47194	3.50267	3.81717	3.67835	3.31619	3.48767	3.4143	3.78733	3.88598	3.26106	3.05427	4.06185	3.78237	4.35661	3.29795	3.60253	4.07744	3.77096	4.0519	[R].EAEALLQSMGLTTDSPIVPPPMSPSSK.[S]	1xPhospho [S23]; 2xOxidation [M9; M22]; 1xTMTpro [K27]; 1xTMTpro [N-Term]	O88487 [59-85]	O88487 1xPhospho [S81]	1	PIVPPPMsPSSK___	Dync1i2
O88532	RRDsDGVDGFEAEGkk.O88532	NA	RRDsDGVDGFEAEGkk	0.303882	5.75089	5.75478	6.02898	6.33811	5.99126	5.55852	5.67139	5.55636	5.68023	5.73568	5.45767	5.29655	5.97687	5.4912	6.1888	5.68826	5.49415	5.44996	6.16049	5.99397	[R].RRDSDGVDGFEAEGKK.[D]	1xPhospho [S4]; 2xTMTpro [K15; K16]; 1xTMTpro [N-Term]	O88532 [1051-1066]	O88532 1xPhospho [S1054]	1	____RRDsDGVDGFE	Zfr
O88532	RRDsDGVDGFEAEGk.O88532	NA	RRDsDGVDGFEAEGk	0.199289	7.19668	7.18695	7.68358	7.6455	7.6555	6.96881	7.06481	7.0599	7.38862	7.2518	6.91795	6.94096	7.52639	7.40784	7.42334	7.15403	7.21477	7.31965	7.50033	7.48766	[R].RRDSDGVDGFEAEGK.[K]	1xPhospho [S4]; 1xTMTpro [K15]; 1xTMTpro [N-Term]	O88532 [1051-1065]	O88532 1xPhospho [S1054]	1	____RRDsDGVDGFE	Zfr
O88704	LGtPPGGGAAGk.O88704	3	LGtPPGGGAAGk	0.00158734	4.82553	4.7433	4.47503	4.00644	4.5691	4.81291	4.76354	5.24288	5.01274	4.98076	4.86044	5.18357	5.83318	5.84348	6.05017	5.60503	5.59978	5.09653	6.36929	6.20917	[R].LGTPPGGGAAGK.[E]	1xPhospho [T3]; 1xTMTpro [K12]; 1xTMTpro [N-Term]	O88704 [37-48]	O88704 1xPhospho [T39]	1	_____LGtPPGGGAA	Hcn1
O88737	SPGPPsPmVAQGTQTPHRPSTPR.O88737	3	SPGPPsPmVAQGTQTPHRPSTPR	5.79e-05	5.54988	5.6414	5.74077	5.65484	5.81878	5.57203	5.52888	5.93958	6.39322	6.52514	6.51141	6.0856	6.54029	6.5333	6.47397	6.87485	6.61788	6.95926	7.06356	7.12985	[R].SPGPPSPMVAQGTQTPHRPSTPR.[L]	1xPhospho [S6]; 1xOxidation [M8]; 1xTMTpro [N-Term]	O88737 [1525-1547]	O88737 1xPhospho [S1530]	1	__SPGPPsPMVAQGT	Bsn
O88737	ISkFsPIEEAk.O88737	6	ISkFsPIEEAk	0.0192822	5.7315	5.854	7.2009	7.3033	7.30467	5.99421	6.30503	7.09298	7.28178	7.19525	6.98127	7.15949	7.03767	7.01312	7.13058	8.22601	8.50066	7.66554	7.5021	7.54545	[K].ISKFSPIEEAK.[D]	1xPhospho [S5]; 2xTMTpro [K3; K11]; 1xTMTpro [N-Term]	O88737 [3378-3388]	O88737 1xPhospho [S3382]	1	___ISKFsPIEEAK_	Bsn
O88737	EkPLsGGDSEVGAPQPSR.O88737	3	EkPLsGGDSEVGAPQPSR	6.12e-07	4.11469	4.20667	4.50395	4.46599	4.52386	4.35405	4.48112	4.74668	4.63135	4.7134	5.45214	5.12361	5.64038	5.80083	5.22246	5.66863	5.60467	5.56182	6.02153	6.00459	[R].EKPLSGGDSEVGAPQPSR.[G]	1xPhospho [S5]; 1xTMTpro [K2]; 1xTMTpro [N-Term]	O88737 [1456-1473]	O88737 1xPhospho [S1460]	1	___EKPLsGGDSEVG	Bsn
O88737	ATsVPGPTQATAPPEVGR.O88737	6	ATsVPGPTQATAPPEVGR	0.000239982	5.8505	6.09415	6.10498	5.98383	6.14694	5.83678	5.62589	5.66767	5.89786	6.08329	5.99423	6.37983	6.5639	6.37367	6.53015	6.36739	6.61536	6.50433	6.94046	6.43316	[R].ATSVPGPTQATAPPEVGR.[V]	1xPhospho [S3]; 1xTMTpro [N-Term]	O88737 [282-299]	O88737 1xPhospho [S284]	1	_____ATsVPGPTQA	Bsn
O88737	SADcSVQtDDEDNADWEQPVR.O88737	6	SADcSVQtDDEDNADWEQPVR	0.0549359	5.1704	5.19288	5.79786	5.12172	5.74479	5.01089	5.21028	5.04148	5.31207	5.08974	5.31463	5.22278	5.25924	5.49268	5.63487	5.41379	5.50281	5.52842	5.66386	5.60687	[R].SADCSVQTDDEDNADWEQPVR.[R]	1xCarbamidomethyl [C4]; 1xPhospho [T8]; 1xTMTpro [N-Term]	O88737 [2615-2635]	O88737 1xPhospho [T2622]	1	SADCSVQtDDEDNAD	Bsn
O88737	TGGTAsPk.O88737	3	TGGTAsPk	4.56e-06	5.96537	5.6746	5.52229	6.15671	6.18654	6.80744	6.91607	7.95379	6.85223	7.1142	8.18357	7.20714	8.07665	8.44815	8.12615	8.33345	8.23544	7.93041	9.191	9.00798	[K].TGGTASPK.[H]	1xPhospho [S6]; 1xTMTpro [K8]; 1xTMTpro [N-Term]	O88737 [430-437]	O88737 1xPhospho [S435]	1	__TGGTAsPK_____	Bsn
O88737	ASPQATkAsPQTTk.O88737	3	ASPQATkAsPQTTk	2.24e-06	5.85402	6.01593	6.52954	6.48383	7.00424	6.05324	5.85125	6.61612	6.38877	6.60965	7.57718	7.71377	7.45607	7.3605	7.51138	7.83497	8.00363	7.99932	7.76513	7.93865	[K].ASPQATKASPQTTK.[A]	1xPhospho [S9]; 2xTMTpro [K7; K14]; 1xTMTpro [N-Term]	O88737 [585-598]	O88737 1xPhospho [S593]	1	SPQATKAsPQTTK__	Bsn
O88737	QILEmsAEEDNLEEDDTAVSGR.O88737	6	QILEmsAEEDNLEEDDTAVSGR	0.0015504	6.96817	6.84942	6.94858	7.15332	7.21076	6.69161	6.48528	6.47837	6.82513	6.89604	6.96555	6.72765	6.82448	6.87123	6.71133	7.03076	7.01775	7.11236	7.13672	7.2122	[R].QILEMSAEEDNLEEDDTAVSGR.[G]	1xPhospho [S6]; 1xOxidation [M5]; 1xTMTpro [N-Term]	O88737 [860-881]	O88737 1xPhospho [S865]	1	__QILEMsAEEDNLE	Bsn
O88737	QASATAPGREsPRETR.O88737	3	QASATAPGREsPRETR	4.35e-05	5.27033	5.5839	5.16265	5.25596	5.98691	5.89421	5.2505	5.41717	5.76985	6.41284	6.78599	6.90315	6.756	7.22729	6.81922	6.33044	6.67185	7.01943	7.1833	7.52818	[K].QASATAPGRESPRETR.[A]	1xPhospho [S11]; 1xTMTpro [N-Term]	O88737 [95-110]	O88737 1xPhospho [S105]	1	ATAPGREsPRETR__	Bsn
O88737	GLPSSAsDmSLQTEEQWEAGR.O88737	6	GLPSSAsDmSLQTEEQWEAGR	0.0663628	5.9627	5.96693	5.9726	5.90905	6.19042	5.85315	5.86937	5.77485	5.72241	5.80323	5.87017	5.70953	5.91996	5.88243	5.78084	5.91247	5.8338	5.75523	6.19558	5.97843	[R].GLPSSASDMSLQTEEQWEAGR.[S]	1xPhospho [S7]; 1xOxidation [M9]; 1xTMTpro [N-Term]	O88737 [2538-2558]	O88737 1xPhospho [S2544]	1	_GLPSSAsDMSLQTE	Bsn
O88737	FsPIEEAk.O88737	3	FsPIEEAk	0.000525107	4.77131	3.91967	5.41005	5.50135	5.59135	4.66508	4.39217	4.69771	5.4557	5.2828	5.42948	6.61534	5.72864	5.54362	5.67152	7.19023	6.9573	6.38064	6.16453	6.87634	[K].FSPIEEAK.[D]	1xPhospho [S2]; 1xTMTpro [K8]; 1xTMTpro [N-Term]	O88737 [3381-3388]	O88737 1xPhospho [S3382]	1	______FsPIEEAK_	Bsn
O88737	QASATAPGREsPR.O88737	4	QASATAPGREsPR	3.22e-05	4.63688	4.69749	4.74596	5.46416	5.64308	5.86202	6.46766	7.41591	6.16688	6.09472	6.7308	6.35967	7.51445	7.39255	7.12452	7.44599	7.29805	6.83312	7.56931	7.25422	[K].QASATAPGRESPR.[E]	1xPhospho [S11]; 1xTMTpro [N-Term]	O88737 [95-107]	O88737 1xPhospho [S105]	1	ATAPGREsPR_____	Bsn
O88737	LHSsPVSSTLTSk.O88737	3	LHSsPVSSTLTSk	0.00202859	6.30895	6.42766	6.01674	6.12083	5.91673	6.33471	6.58967	7.21417	6.68318	6.56391	6.64556	6.4011	7.38756	7.6388	7.45612	7.37927	7.1882	6.84684	8.04777	7.8272	[K].LHSSPVSSTLTSK.[E]	1xPhospho [S4]; 1xTMTpro [K13]; 1xTMTpro [N-Term]	O88737 [1367-1379]	O88737 1xPhospho [S1370]	1	____LHSsPVSSTLT	Bsn
O88737	AQGPSGQEAEsPRR.O88737	3	AQGPSGQEAEsPRR	1.23e-05	4.06957	4.08638	3.52349	4.82733	3.63123	4.22882	4.54883	5.26778	4.97778	4.84034	5.76946	5.3784	6.0127	6.72637	6.41011	5.97002	6.03643	5.83867	6.57051	6.40023	[R].AQGPSGQEAESPRR.[T]	1xPhospho [S11]; 1xTMTpro [N-Term]	O88737 [111-124]	O88737 1xPhospho [S121]	1	PSGQEAEsPRR____	Bsn
O88737	GEEEsEEDSYDPR.O88737	3	GEEEsEEDSYDPR	2.1e-06	4.16005	3.80008	4.16193	3.66371	4.42142	4.40113	4.77361	6.13623	4.97906	4.79524	5.88783	5.94826	7.01724	6.91104	7.12415	7.40283	7.32484	6.48189	7.91995	7.59587	[R].GEEESEEDSYDPR.[G]	1xPhospho [S5]; 1xTMTpro [N-Term]	O88737 [3297-3309]	O88737 1xPhospho [S3301]	1	___GEEEsEEDSYDP	Bsn
O88737	RIADSSVQtDDEEGEGR.O88737	3	RIADSSVQtDDEEGEGR	0.000805296	4.69393	4.70429	4.25582	4.80067	5.20403	4.81779	4.45191	4.40754	5.01779	5.40706	5.90691	5.24873	5.84165	5.65093	4.98709	5.59003	5.94627	5.64613	6.10609	5.76965	[R].RIADSSVQTDDEEGEGR.[Y]	1xPhospho [T9]; 1xTMTpro [N-Term]	O88737 [2587-2603]	O88737 1xPhospho [T2595]	1	IADSSVQtDDEEGEG	Bsn
O88737	DYLsDSELNQLR.O88737	3	DYLsDSELNQLR	0.000167092	5.52825	5.43666	4.83807	4.95393	5.21226	5.70854	5.40275	6.48392	5.68766	5.58845	6.24531	6.20429	7.34585	7.47003	7.12754	6.86784	6.8511	6.6425	8.34602	7.87406	[R].DYLSDSELNQLR.[L]	1xPhospho [S4]; 1xTMTpro [N-Term]	O88737 [3019-3030]	O88737 1xPhospho [S3022]	1	____DYLsDSELNQL	Bsn
O88737	AHVsPQkQFIADSTLR.O88737	3	AHVsPQkQFIADSTLR	0.00212091	4.75001	4.93382	5.15883	4.99133	5.19194	4.67634	4.72312	4.64789	5.30725	5.26641	5.55078	5.25744	5.34	5.40634	5.09529	5.5615	5.47033	5.84727	5.39688	5.62508	[K].AHVSPQKQFIADSTLR.[Q]	1xPhospho [S4]; 1xTMTpro [K7]; 1xTMTpro [N-Term]	O88737 [2829-2844]	O88737 1xPhospho [S2832]	1	____AHVsPQKQFIA	Bsn
O88737	SADcSVQtDDEDNADWEQPVRR.O88737	3	SADcSVQtDDEDNADWEQPVRR	4.27e-06	4.45997	4.3305	4.06616	4.40924	4.18749	4.46148	3.99095	4.30575	4.55833	4.54518	5.61739	5.03563	5.72147	5.39188	4.95948	5.37922	5.70027	5.4336	6.17994	5.90762	[R].SADCSVQTDDEDNADWEQPVRR.[R]	1xCarbamidomethyl [C4]; 1xPhospho [T8]; 1xTMTpro [N-Term]	O88737 [2615-2636]	O88737 1xPhospho [T2622]	1	SADCSVQtDDEDNAD	Bsn
O88737	IADSSVQtDDEEGEGR.O88737	3	IADSSVQtDDEEGEGR	0.00206209	6.65644	6.67101	7.2442	6.9653	7.04519	6.90707	6.65749	6.49662	6.95153	7.09214	7.77127	7.22722	7.76204	7.41439	7.03402	7.42807	7.77346	7.32876	7.65859	7.31875	[R].IADSSVQTDDEEGEGR.[Y]	1xPhospho [T8]; 1xTMTpro [N-Term]	O88737 [2588-2603]	O88737 1xPhospho [T2595]	1	IADSSVQtDDEEGEG	Bsn
O88737	SPSVsPDR.O88737	3	SPSVsPDR	9.42e-08	5.02898	5.35144	5.55391	5.05569	5.31398	5.50072	5.23606	5.70173	5.72979	5.62423	6.47822	6.83179	7.23112	7.38201	7.08238	8.07044	7.78506	7.24341	8.14906	8.63757	[R].SPSVSPDR.[G]	1xPhospho [S5]; 1xTMTpro [N-Term]	O88737 [138-145]	O88737 1xPhospho [S142]	1	___SPSVsPDR____	Bsn
O88737	LLDTSFAsSER.O88737	3	LLDTSFAsSER	0.000124592	5.69508	4.92054	5.60501	5.79867	5.40814	5.5996	6.17966	7.10254	6.13004	5.81859	6.87165	6.1481	7.66928	7.20074	7.10585	7.61229	7.45654	6.84843	8.13597	7.76222	[R].LLDTSFASSER.[L]	1xPhospho [S8]; 1xTMTpro [N-Term]	O88737 [2815-2825]	O88737 1xPhospho [S2822]	1	LLDTSFAsSER____	Bsn
O88737	LLDTSFAsSERLNk.O88737	3	LLDTSFAsSERLNk	1.53e-05	5.77188	5.78757	5.79888	5.73616	6.21474	5.68466	5.12216	5.15535	5.29435	5.93081	7.05446	6.67541	7.26653	6.55435	6.03336	6.92107	7.00993	7.24341	7.45048	7.9135	[R].LLDTSFASSERLNK.[A]	1xPhospho [S8]; 1xTMTpro [K14]; 1xTMTpro [N-Term]	O88737 [2815-2828]	O88737 1xPhospho [S2822]	1	LLDTSFAsSERLNK_	Bsn
O88737	SPSVsPDRGSTPTSPYSVPQIAPLPSSTLcPIck.O88737	3	SPSVsPDRGSTPTSPYSVPQIAPLPSSTLcPIck	8.56e-06	3.58118	3.79771	3.9959	3.80404	3.93112	3.64669	3.58581	4.6904	4.56098	4.55627	4.69581	5.13081	5.30251	5.95391	5.79502	5.70941	5.79854	5.6924	6.29959	6.42837	[R].SPSVSPDRGSTPTSPYSVPQIAPLPSSTLCPICK.[T]	2xCarbamidomethyl [C30; C33]; 1xPhospho [S5]; 1xTMTpro [K34]; 1xTMTpro [N-Term]	O88737 [138-171]	O88737 1xPhospho [S142]	1	___SPSVsPDRGSTP	Bsn
O88737	TTsPTPk.O88737	4	TTsPTPk	3.14e-06	7.87018	7.88895	7.57451	7.85227	7.72922	9.22413	9.24494	9.81903	9.49583	9.75795	10.6142	9.33466	10.5191	10.9469	9.99903	9.43975	9.51885	9.5772	10.3411	10.2913	[R].TTSPTPK.[Q]	1xPhospho [S3]; 1xTMTpro [K7]; 1xTMTpro [N-Term]	O88737 [88-94]	O88737 1xPhospho [S90]	1	_____TTsPTPK___	Bsn
O88737	SkSQQQLHsPALsPAHSPAkQPLGkPEQER.O88737	3	SkSQQQLHsPALsPAHSPAkQPLGkPEQER	0.00176193	4.73187	5.20138	4.97903	5.217	5.30426	5.07869	4.79224	4.55776	5.09424	5.5294	6.03573	5.52725	5.82718	6.03784	5.10733	5.81393	5.58888	5.95383	5.779	6.10152	[R].SKSQQQLHSPALSPAHSPAKQPLGKPEQER.[S]	2xPhospho [S9; S13]; 3xTMTpro [K2; K20; K25]; 1xTMTpro [N-Term]	O88737 [233-262]	O88737 2xPhospho [S241; S245]	2	KSQQQLHsPALsPAH	Bsn
O88737	mASAYsGEk.O88737	3	mASAYsGEk	3.49e-05	6.83106	6.80247	7.62224	7.67162	7.65718	7.33963	7.7698	8.73675	8.02676	7.92072	8.79755	8.30222	9.07534	8.94486	8.79691	9.60814	9.24144	8.77973	9.51022	9.0456	[R].MASAYSGEK.[L]	1xPhospho [S6]; 1xOxidation [M1]; 1xTMTpro [K9]; 1xTMTpro [N-Term]	O88737 [3455-3463]	O88737 1xPhospho [S3460]	1	__MASAYsGEK____	Bsn
O88737	TLPsPPPEEAHLPLAGQVPSQLYAASLLQR.O88737	6	TLPsPPPEEAHLPLAGQVPSQLYAASLLQR	0.000687406	3.47762	3.35855	3.3894	2.60578	3.39135	2.27679	2.70429	3.09408	3.16302	3.04995	3.56214	3.64172	3.68269	4.31217	4.33652	3.83298	3.79564	4.05947	4.91485	4.63525	[R].TLPSPPPEEAHLPLAGQVPSQLYAASLLQR.[G]	1xPhospho [S4]; 1xTMTpro [N-Term]	O88737 [2905-2934]	O88737 1xPhospho [S2908]	1	____TLPsPPPEEAH	Bsn
O88737	SQGsFEYQDTQDHDYGGR.O88737	3	SQGsFEYQDTQDHDYGGR	6.74e-06	6.6174	6.66218	6.85789	6.6563	6.75357	6.90854	6.77164	6.64467	6.96243	7.24027	7.0772	7.50876	7.77426	7.40603	7.52037	7.59197	7.76057	7.76679	8.23168	8.03015	[R].SQGSFEYQDTQDHDYGGR.[A]	1xPhospho [S4]; 1xTMTpro [N-Term]	O88737 [1233-1250]	O88737 1xPhospho [S1236]	1	____SQGsFEYQDTQ	Bsn
O88738	VITDPSLSkTDsFkR.O88738	5	VITDPSLSkTDsFkR	0.0439481	6.83949	6.86028	7.10658	7.07377	7.11636	7.33156	6.75724	6.33773	7.03157	7.72455	7.27429	7.13382	7.13735	7.06482	7.16897	6.59851	6.77168	6.62291	6.35222	6.57128	[K].VITDPSLSKTDSFKR.[L]	1xPhospho [S12]; 2xTMTpro [K9; K14]; 1xTMTpro [N-Term]	O88738 [4036-4050]	O88738 1xPhospho [S4047]	1	PSLSKTDsFKR____	Birc6
O88809	GNPSAAAGPkAsPTPQk.O88809	1	GNPSAAAGPkAsPTPQk	8.78e-07	8.23557	7.59992	8.83076	8.9531	8.61528	6.81094	6.98048	6.69795	7.53229	7.66793	5.99954	6.18321	5.64519	5.75397	5.71978	6.13237	6.1008	6.15998	5.58435	5.31777	[K].GNPSAAAGPKASPTPQK.[T]	1xPhospho [S12]; 2xTMTpro [K10; K17]; 1xTMTpro [N-Term]	O88809 [276-292]	O88809 1xPhospho [S287]	1	AAAGPKAsPTPQK__	Dcx
O88809	TSAksPGPmR.O88809	5	TSAksPGPmR	3.51e-09	8.95944	8.49184	8.41716	8.83841	8.23971	7.44082	7.94747	7.10231	7.9903	7.46419	4.97355	3.65732	5.09463	5.01353	4.31724	3.901	3.71876	4.12302	3.26919	3.48056	[K].TSAKSPGPMR.[R]	1xPhospho [S5]; 1xOxidation [M9]; 1xTMTpro [K4]; 1xTMTpro [N-Term]	O88809 [293-302]	O88809 1xPhospho [S297]	1	___TSAKsPGPMR__	Dcx
O88809	QSPISTPTsPGSLR.O88809	5	QSPISTPTsPGSLR	3.46e-08	6.21396	6.06614	6.11065	6.44411	6.75358	5.49575	5.41978	5.44913	5.6127	5.55647	5.07723	4.79253	5.09611	5.09144	4.9196	4.69185	4.8464	4.72525	4.91494	4.74221	[K].QSPISTPTSPGSLR.[K]	1xPhospho [S9]; 1xTMTpro [N-Term]	O88809 [331-344]	O88809 1xPhospho [S339]	1	SPISTPTsPGSLR__	Dcx
O88809	TSAksPGPmRR.O88809	5	TSAksPGPmRR	1.89e-07	7.80784	7.67004	7.66883	8.19097	8.29083	6.4712	5.89065	4.60552	6.0383	6.59514	4.38359	3.78438	3.81545	4.95941	3.55877	3.41339	3.59702	3.97723	3.52808	2.38665	[K].TSAKSPGPMRR.[S]	1xPhospho [S5]; 1xOxidation [M9]; 1xTMTpro [K4]; 1xTMTpro [N-Term]	O88809 [293-303]	O88809 1xPhospho [S297]	1	___TSAKsPGPMRR_	Dcx
O88935	QPQRDAsPGR.O88935	6	QPQRDAsPGR	0.000850129	4.89927	5.37399	5.84529	6.13723	6.40469	5.53697	4.42255	3.53179	4.91137	5.71209	6.41303	6.04109	5.64011	6.35706	5.28426	7.08449	6.83273	7.27365	6.64458	7.43252	[R].QPQRDASPGR.[G]	1xPhospho [S7]; 1xTMTpro [N-Term]	O88935 [421-430]	O88935 1xPhospho [S427]	1	_QPQRDAsPGR____	Syn1
O88935	QAsISGPAPTk.O88935	6	QAsISGPAPTk	0.0760489	6.32767	5.86315	6.05668	6.34197	7.05965	6.32401	6.01498	5.29201	6.4094	6.4364	6.49876	6.46627	6.73513	6.16559	6.45077	7.06249	6.94062	6.34287	7.113	6.59867	[R].QASISGPAPTK.[A]	1xPhospho [S3]; 1xTMTpro [K11]; 1xTMTpro [N-Term]	O88935 [566-576]	O88935 1xPhospho [S568]	1	_____QAsISGPAPT	Syn1
O89026	kVPsFTFTPTVTYQR.O89026	5	kVPsFTFTPTVTYQR	7.2e-08	6.62525	6.41477	6.40862	6.5739	6.56125	5.7778	5.25159	4.88304	5.59392	5.66263	5.16325	4.55719	4.85753	5.10227	4.77411	4.57336	4.45381	4.31314	4.59694	4.33558	[R].KVPSFTFTPTVTYQR.[G]	1xPhospho [S4]; 1xTMTpro [K1]; 1xTMTpro [N-Term]	O89026 [898-912]	O89026 1xPhospho [S901]	1	____KVPsFTFTPTV	Robo1
O89026	LAsIEAR.O89026	5	LAsIEAR	0.00486032	6.15987	6.44423	6.08957	5.96633	6.56979	6.13632	5.85344	5.23546	6.16602	6.16343	5.41555	5.82765	5.97107	5.59036	5.57759	5.45647	5.38652	5.44682	5.7015	5.47422	[K].LASIEAR.[T]	1xPhospho [S3]; 1xTMTpro [N-Term]	O89026 [1472-1478]	O89026 1xPhospho [S1474]	1	_____LAsIEAR___	Robo1
O89026	GSSTSGsQGHk.O89026	2	GSSTSGsQGHk	0.00255023	6.35671	5.99446	6.20979	6.09657	5.35378	5.63853	6.51683	6.43936	6.69312	6.15844	5.15504	4.95362	5.9914	6.29642	5.88648	5.2067	4.77046	5.08805	5.21716	4.74947	[R].GSSTSGSQGHK.[K]	1xPhospho [S7]; 1xTMTpro [K11]; 1xTMTpro [N-Term]	O89026 [1117-1127]	O89026 1xPhospho [S1123]	1	_GSSTSGsQGHK___	Robo1
O89026	EAYADDLPPPPVPPPAIksPTVQSk.O89026	5	EAYADDLPPPPVPPPAIksPTVQSk	9.2e-07	5.90886	5.4004	5.17365	5.60354	5.7188	5.32162	4.94976	4.85423	5.15235	5.06541	4.46777	4.25521	4.20875	4.49937	4.3549	3.55231	3.07728	3.96906	4.10433	3.87007	[R].EAYADDLPPPPVPPPAIKSPTVQSK.[A]	1xPhospho [S19]; 2xTMTpro [K18; K25]; 1xTMTpro [N-Term]	O89026 [1435-1459]	O89026 1xPhospho [S1453]	1	VPPPAIKsPTVQSK_	Robo1
O89032	AQISsPNLR.O89032	6	AQISsPNLR	0.0441666	5.72891	5.78463	5.37712	6.47081	5.37223	5.19155	4.95791	5.21057	5.3224	5.73145	5.59318	5.81789	5.87586	6.23332	5.98655	5.55113	5.45245	5.62357	5.89564	5.75643	[R].AQISSPNLR.[T]	1xPhospho [S5]; 1xTMTpro [N-Term]	O89032 [416-424]	O89032 1xPhospho [S420]	1	___AQISsPNLR___	Sh3pxd2a
O89032	AAsQGSESPLLPTQR.O89032	6	AAsQGSESPLLPTQR	0.0122255	5.26824	5.50772	5.23018	5.84021	5.57892	5.13012	5.03045	4.90689	5.41249	5.41575	5.34567	5.73062	5.87551	5.69552	5.57443	5.39773	5.79964	5.80325	5.98231	5.63179	[R].AASQGSESPLLPTQR.[K]	1xPhospho [S3]; 1xTMTpro [N-Term]	O89032 [1027-1041]	O89032 1xPhospho [S1029]	1	_____AAsQGSESPL	Sh3pxd2a
O89032	RIsPASSLQR.O89032	3	RIsPASSLQR	3.37e-07	6.86633	6.79738	6.64356	7.2352	6.91616	6.9008	6.78243	6.94723	6.97212	7.04052	7.65653	7.85448	8.04282	8.21353	8.24777	7.99023	7.90315	8.09972	8.23809	8.48661	[R].RISPASSLQR.[A]	1xPhospho [S3]; 1xTMTpro [N-Term]	O89032 [590-599]	O89032 1xPhospho [S592]	1	_____RIsPASSLQR	Sh3pxd2a
O89084	SLsLSLPGPR.O89084	3	SLsLSLPGPR	3.23e-06	4.07022	4.24235	4.85024	5.05757	4.73121	5.22938	5.03045	4.85186	5.31812	5.58592	5.53763	6.11683	5.89387	5.9578	5.9627	6.3328	6.60409	6.20631	6.30496	6.10462	[R].SLSLSLPGPR.[E]	1xPhospho [S3]; 1xTMTpro [N-Term]	O89084 [11-20]	O89084 1xPhospho [S13]	1	_____SLsLSLPGPR	Pde4a
O89084	GYsDSAER.O89084	3	GYsDSAER	6.8e-07	4.65327	4.46892	4.81076	4.60558	4.79136	5.18807	5.26111	5.65073	5.81805	5.59306	5.97359	6.21383	6.57257	6.98239	7.03696	6.80256	6.83706	6.3094	7.22528	6.7521	[R].GYSDSAER.[S]	1xPhospho [S3]; 1xTMTpro [N-Term]	O89084 [47-54]	O89084 1xPhospho [S49]	1	_____GYsDSAER__	Pde4a
O89084	LVHTGsLNINVPR.O89084	NA	LVHTGsLNINVPR	0.282327	4.90443	4.73798	5.20636	6.00715	5.90303	4.90109	4.95689	4.66345	5.44709	5.51329	5.33107	5.89548	5.19043	5.2985	5.31832	5.87708	5.82857	5.62877	5.59873	5.18253	[K].LVHTGSLNINVPR.[F]	1xPhospho [S6]; 1xTMTpro [N-Term]	O89084 [328-340]	O89084 1xPhospho [S333]	1	__LVHTGsLNINVPR	Pde4a
P05480	LFGGFNSSDTVTsPQR.P05480	5	LFGGFNSSDTVTsPQR	0.0336342	5.37976	4.93123	5.50097	5.74054	5.39699	5.29799	5.20299	5.30672	5.26184	5.4157	5.36038	4.83364	5.10009	5.25532	4.93191	4.97163	4.74333	4.40657	4.99364	5.28228	[K].LFGGFNSSDTVTSPQR.[A]	1xPhospho [S13]; 1xTMTpro [N-Term]	P05480 [62-77]	P05480 1xPhospho [S74]	1	NSSDTVTsPQR____	Src
P05480	RRsLEPSENVHGAGGAFPASQTPSkPASADGHR.P05480	NA	RRsLEPSENVHGAGGAFPASQTPSkPASADGHR	0.652777	4.51009	4.47398	5.1365	4.62981	4.59095	4.6156	4.96873	4.85885	4.61957	4.87602	4.04236	4.37983	4.75629	4.94905	4.71063	4.47934	4.40915	4.1229	4.9877	4.88455	[R].RRSLEPSENVHGAGGAFPASQTPSKPASADGHR.[G]	1xPhospho [S3]; 1xTMTpro [K25]; 1xTMTpro [N-Term]	P05480 [15-47]	P05480 1xPhospho [S17]	1	_____RRsLEPSENV	Src
P06837	IQAsFRGHITR.P06837	1	IQAsFRGHITR	3.84e-05	6.82035	7.34215	7.11177	7.49436	7.84586	6.78184	6.14893	5.30424	5.85164	6.23947	5.62417	6.19847	5.99305	5.52004	5.7372	5.17875	5.23635	5.59236	5.7572	5.72415	[K].IQASFRGHITR.[K]	1xPhospho [S4]; 1xTMTpro [N-Term]	P06837 [38-48]	P06837 1xPhospho [S41]	1	____IQAsFRGHITR	Gap43
P06837	ATTDNsPSSk.P06837	8	ATTDNsPSSk	0.00708607	6.69872	6.87866	7.27036	6.95004	6.20534	6.8654	6.91407	7.28904	7.63475	7.01971	7.04945	7.45895	8.04768	7.96844	8.00758	7.04762	6.96396	6.96318	6.66032	7.07207	[K].ATTDNSPSSK.[A]	1xPhospho [S6]; 1xTMTpro [K10]; 1xTMTpro [N-Term]	P06837 [137-146]	P06837 1xPhospho [S142]	1	__ATTDNsPSSK___	Gap43
P06837	AGsAETESAAk.P06837	8	AGsAETESAAk	0.0157702	5.784	6.01347	6.21946	6.16355	6.06877	5.79396	6.07549	6.42212	6.36494	6.03222	6.01156	6.66496	6.95492	6.69022	6.94392	6.20372	6.35799	6.31575	6.32582	6.68783	[K].AGSAETESAAK.[A]	1xPhospho [S3]; 1xTMTpro [K11]; 1xTMTpro [N-Term]	P06837 [126-136]	P06837 1xPhospho [S128]	1	_____AGsAETESAA	Gap43
P06837	kEGDGSATTDAAPATsPk.P06837	1	kEGDGSATTDAAPATsPk	0.0244951	6.2709	6.96819	7.50841	6.76822	6.73549	5.90142	5.78476	5.89756	6.37955	6.13868	5.96595	7.19043	6.95503	6.565	6.46377	5.87403	6.23839	6.27025	5.35329	6.65653	[K].KEGDGSATTDAAPATSPK.[A]	1xPhospho [S16]; 2xTMTpro [K1; K18]; 1xTMTpro [N-Term]	P06837 [81-98]	P06837 1xPhospho [S96]	1	TDAAPATsPK_____	Gap43
P07901	EVsDDEAEEk.P07901	1	EVsDDEAEEk	0.00231076	7.55065	7.33455	7.49181	7.3277	7.23711	6.82033	6.82496	6.68762	6.80649	6.86639	6.1966	6.83681	6.89183	7.10183	6.96344	6.83246	6.64923	6.72914	6.94655	7.15268	[K].EVSDDEAEEK.[E]	1xPhospho [S3]; 1xTMTpro [K10]; 1xTMTpro [N-Term]	P07901 [229-238]	P07901 1xPhospho [S231]	1	_____EVsDDEAEEK	Hsp90aa1
P07901	ESDDkPEIEDVGsDEEEEEk.P07901	6	ESDDkPEIEDVGsDEEEEEk	0.0281705	6.75088	6.424	7.26745	7.1475	6.61922	6.19378	6.33915	6.10836	6.25244	6.31514	5.94692	6.60431	6.55925	6.27959	6.30968	6.84856	6.55234	5.99849	6.42056	6.72533	[K].ESDDKPEIEDVGSDEEEEEK.[K]	1xPhospho [S13]; 2xTMTpro [K5; K20]; 1xTMTpro [N-Term]	P07901 [251-270]	P07901 1xPhospho [S263]	1	PEIEDVGsDEEEEEK	Hsp90aa1
P08551	DEPPsEGEAEEEEk.P08551	3	DEPPsEGEAEEEEk	0.000296558	5.49232	5.3837	5.96093	5.70822	5.57705	5.3377	5.24916	5.65745	5.56124	5.89075	5.7205	6.7761	6.25576	6.08646	6.45617	6.7332	6.36019	6.51818	6.45964	7.2736	[K].DEPPSEGEAEEEEK.[E]	1xPhospho [S5]; 1xTMTpro [K14]; 1xTMTpro [N-Term]	P08551 [469-482]	P08551 1xPhospho [S473]	1	___DEPPsEGEAEEE	Nefl
P08551	EEsAGEEQVAk.P08551	6	EEsAGEEQVAk	0.0956679	5.11261	5.12751	5.35476	5.23131	5.13172	4.74175	4.63569	4.68301	4.70178	5.02127	4.80246	5.38444	5.14944	4.72749	5.10485	5.17591	4.90699	4.75139	5.10882	5.84934	[K].EESAGEEQVAK.[K]	1xPhospho [S3]; 1xTMTpro [K11]; 1xTMTpro [N-Term]	P08551 [530-540]	P08551 1xPhospho [S532]	1	_____EEsAGEEQVA	Nefl
P08553	QLsDIEER.P08553	4	QLsDIEER	0.000205613	7.06601	6.97906	6.37973	5.89525	6.20103	7.23099	7.4536	7.99524	7.36814	7.44736	7.73528	7.83049	9.42883	8.81084	9.62247	8.33623	8.06103	7.92914	8.67854	8.67222	[R].QLSDIEER.[H]	1xPhospho [S3]; 1xTMTpro [N-Term]	P08553 [342-349]	P08553 1xPhospho [S344]	1	_____QLsDIEER__	Nefm
P08553	GVVTNGLDVsPAEEkkGEDSSDDkVVVTk.P08553	4	GVVTNGLDVsPAEEkkGEDSSDDkVVVTk	0.000111687	8.25287	8.1443	7.51568	6.82759	7.66429	8.64731	9.68571	10.6762	9.79643	9.59768	9.3524	9.65274	11.262	10.4457	11.4095	10.6488	10.3705	9.85915	10.2716	9.91335	[K].GVVTNGLDVSPAEEKKGEDSSDDKVVVTK.[K]	1xPhospho [S10]; 4xTMTpro [K15; K16; K24; K29]; 1xTMTpro [N-Term]	P08553 [760-788]	P08553 1xPhospho [S769]	1	VTNGLDVsPAEEKKG	Nefm
P08553	sPQESk.P08553	3	sPQESk	3.28e-05	5.24455	5.29422	6.29945	5.74233	5.32627	5.66687	5.68307	6.3369	6.12965	5.58595	6.29163	7.42772	7.65325	6.94789	7.22553	7.8387	7.28967	7.34131	6.89223	7.79112	[R].SPQESK.[K]	1xPhospho [S1]; 1xTMTpro [K6]; 1xTMTpro [N-Term]	P08553 [723-728]	P08553 1xPhospho [S723]	1	_______sPQESK__	Nefm
P08553	EEEPEAEksPVksPEAk.P08553	3	EEEPEAEksPVksPEAk	4.83e-05	4.05966	4.05777	5.33251	4.4626	4.25804	4.42023	4.39336	5.20978	5.08654	5.01104	5.38827	6.8957	6.54696	5.79636	6.23821	6.76422	6.66807	6.22818	5.8354	6.81216	[K].EEEPEAEKSPVKSPEAK.[E]	2xPhospho [S9; S13]; 3xTMTpro [K8; K12; K17]; 1xTMTpro [N-Term]	P08553 [494-510]	P08553 2xPhospho [S502; S506]	2	EEPEAEKsPVKsPEA	Nefm
P08553	EGSsEk.P08553	4	EGSsEk	0.00165198	6.24183	6.03045	5.83065	5.5496	5.36944	6.35372	6.77386	7.20725	6.90625	6.9209	6.06686	7.41758	8.18826	7.75088	8.11247	7.03955	6.61619	7.23714	7.32894	6.7917	[K].EGSSEK.[D]	1xPhospho [S4]; 1xTMTpro [K6]; 1xTMTpro [N-Term]	P08553 [548-553]	P08553 1xPhospho [S551]	1	____EGSsEK_____	Nefm
P08553	EVTkEsPk.P08553	3	EVTkEsPk	3.62e-05	6.71469	6.8159	7.16181	6.68737	6.73838	6.74808	6.89626	7.66251	7.41413	7.11374	7.34389	8.79067	9.1286	8.02668	8.32513	9.01462	8.81327	8.35478	8.53799	9.37693	[K].EVTKESPK.[E]	1xPhospho [S6]; 2xTMTpro [K4; K8]; 1xTMTpro [N-Term]	P08553 [640-647]	P08553 1xPhospho [S645]	1	__EVTKEsPK_____	Nefm
P08553	sPVEEVkPkPEAk.P08553	3	sPVEEVkPkPEAk	6.93e-05	6.52283	6.69188	6.84674	6.54116	6.80767	6.92804	7.36969	8.27691	7.63894	7.56497	7.52271	9.05168	9.1572	8.12023	9.05731	8.88573	8.95773	8.15725	8.39528	8.76192	[K].SPVEEVKPKPEAK.[A]	1xPhospho [S1]; 3xTMTpro [K7; K9; K13]; 1xTMTpro [N-Term]	P08553 [610-622]	P08553 1xPhospho [S610]	1	_______sPVEEVKP	Nefm
P08553	GSGREEEkGVVTNGLDVsPAEEk.P08553	4	GSGREEEkGVVTNGLDVsPAEEk	0.147257	6.05153	5.46496	6.3775	5.9288	6.35185	5.53589	6.84514	7.92812	6.98683	7.14801	6.07294	6.40439	7.86828	7.25476	8.0049	8.4209	7.99102	7.08001	6.47411	6.12684	[K].GSGREEEKGVVTNGLDVSPAEEK.[K]	1xPhospho [S18]; 2xTMTpro [K8; K23]; 1xTMTpro [N-Term]	P08553 [752-774]	P08553 1xPhospho [S769]	1	VTNGLDVsPAEEK__	Nefm
P08553	kAEsPVkEk.P08553	3	kAEsPVkEk	4.49e-07	8.42556	8.36686	8.81519	8.68692	8.73402	9.0638	9.15134	9.74753	9.30463	9.48129	9.76366	10.2835	10.5312	9.97557	10.5885	10.497	10.4009	10.4652	10.1678	10.18	[K].KAESPVKEK.[A]	1xPhospho [S4]; 3xTMTpro [K1; K7; K9]; 1xTMTpro [N-Term]	P08553 [666-674]	P08553 1xPhospho [S669]	1	____KAEsPVKEK__	Nefm
P08553	VTETRSsFSR.P08553	8	VTETRSsFSR	0.0220644	7.03088	7.3376	7.54926	7.19878	7.61004	7.91815	7.21987	6.62041	7.9327	8.31703	8.03878	8.92714	8.49347	7.95351	8.15826	7.92088	7.63824	8.02065	7.6863	7.72084	[R].VTETRSSFSR.[V]	1xPhospho [S7]; 1xTMTpro [N-Term]	P08553 [17-26]	P08553 1xPhospho [S23]	1	_VTETRSsFSR____	Nefm
P08553	VSGsPSSGFR.P08553	3	VSGsPSSGFR	1.4e-05	6.51972	6.80526	6.86383	6.3465	6.3045	7.10516	6.9286	7.78049	7.54489	7.8351	7.76194	8.4596	8.48791	8.26795	8.95396	7.71557	7.66315	8.10478	8.01531	8.10874	[R].VSGSPSSGFR.[S]	1xPhospho [S4]; 1xTMTpro [N-Term]	P08553 [27-36]	P08553 1xPhospho [S30]	1	____VSGsPSSGFR_	Nefm
P08553	AEEEGGsEEEGSDR.P08553	3	AEEEGGsEEEGSDR	0.000100848	2.57363	3.57085	4.68094	3.45956	2.37365	4.21742	3.93672	5.22343	4.79151	4.554	4.75402	6.55994	6.42133	5.40273	6.48249	6.3204	6.08054	5.91166	5.55848	6.39275	[K].AEEEGGSEEEGSDR.[S]	1xPhospho [S7]; 1xTMTpro [N-Term]	P08553 [709-722]	P08553 1xPhospho [S715]	1	_AEEEGGsEEEGSDR	Nefm
P08553	sIELESVR.P08553	3	sIELESVR	0.00111295	6.00798	6.26442	6.03772	5.98848	6.10963	6.18562	6.08034	6.79782	6.3308	5.96731	6.35747	6.71233	7.67693	7.24239	8.03405	7.2471	6.96527	6.84642	7.50556	7.34321	[K].SIELESVR.[G]	1xPhospho [S1]; 1xTMTpro [N-Term]	P08553 [326-333]	P08553 1xPhospho [S326]	1	_______sIELESVR	Nefm
P08553	QLQSksIELESVR.P08553	3	QLQSksIELESVR	2.75e-07	6.45412	6.73977	6.81182	6.92193	7.15014	6.91312	6.83214	6.95355	7.04538	7.16823	7.69142	8.13782	8.28359	7.8329	8.35968	8.32716	8.08091	8.24862	8.0189	8.23764	[R].QLQSKSIELESVR.[G]	1xPhospho [S6]; 1xTMTpro [K5]; 1xTMTpro [N-Term]	P08553 [321-333]	P08553 1xPhospho [S326]	1	__QLQSKsIELESVR	Nefm
P08553	GVVTNGLDVsPAEEk.P08553	7	GVVTNGLDVsPAEEk	0.00169046	6.33044	6.3893	6.24704	6.04176	6.34479	6.6004	7.45805	8.54595	7.43646	6.95172	6.8362	7.64803	8.15625	7.5602	8.33319	6.62299	6.79917	6.50753	6.71112	6.48896	[K].GVVTNGLDVSPAEEK.[K]	1xPhospho [S10]; 1xTMTpro [K15]; 1xTMTpro [N-Term]	P08553 [760-774]	P08553 1xPhospho [S769]	1	VTNGLDVsPAEEK__	Nefm
P08553	AEsPVkEk.P08553	3	AEsPVkEk	1.71e-06	6.55749	6.69089	6.47377	6.01554	6.25483	7.06654	7.2787	7.77717	7.5851	7.96261	7.81976	8.45525	9.31981	8.55593	9.31701	8.69056	8.52858	8.75942	8.81773	8.95889	[K].AESPVKEK.[A]	1xPhospho [S3]; 2xTMTpro [K6; K8]; 1xTMTpro [N-Term]	P08553 [667-674]	P08553 1xPhospho [S669]	1	_____AEsPVKEK__	Nefm
P08553	AEsPVk.P08553	3	AEsPVk	8.88e-05	5.89397	5.83426	6.41568	5.81792	5.47902	6.01723	6.3496	7.01264	6.77322	6.35579	6.52407	7.91605	8.47605	7.37386	8.07775	8.48187	7.96069	7.46185	7.5961	8.55921	[K].AESPVK.[E]	1xPhospho [S3]; 1xTMTpro [K6]; 1xTMTpro [N-Term]	P08553 [667-672]	P08553 1xPhospho [S669]	1	_____AEsPVK____	Nefm
P0C0A3	mHQVmsIEEVER.P0C0A3	NA	mHQVmsIEEVER	0.101377	4.55374	4.33074	4.81195	4.83481	4.99688	4.34457	4.39736	4.17488	4.03446	4.45356	4.27915	3.90507	4.61903	4.52081	4.60241	4.13016	4.56871	4.87966	4.90559	4.57634	[K].MHQVMSIEEVER.[I]	1xPhospho [S6]; 2xOxidation [M1; M5]; 1xTMTpro [N-Term]	P0C0A3 [114-125]	P0C0A3 1xPhospho [S119]	1	__MHQVMsIEEVER_	Chmp6
P0C7L0	AQLVsPPAPPTk.P0C7L0	4	AQLVsPPAPPTk	0.00970035	6.23884	6.00411	6.401	6.56297	6.34599	6.16785	6.44575	6.63872	6.34705	6.38123	6.25435	6.31018	6.84675	6.50109	6.63131	6.98416	6.68335	6.52468	6.99542	7.11043	[K].AQLVSPPAPPTK.[V]	1xPhospho [S5]; 1xTMTpro [K12]; 1xTMTpro [N-Term]	P0C7L0 [207-218]	P0C7L0 1xPhospho [S211]	1	___AQLVsPPAPPTK	Wipf3
P0C7L0	LNPPPAPPARsPTTELSSk.P0C7L0	NA	LNPPPAPPARsPTTELSSk	0.405737	6.683	6.49427	6.38718	6.48972	6.51768	6.46449	6.30398	6.39751	6.55102	6.5333	6.35842	6.0639	6.554	6.53072	6.13826	6.59503	6.23783	6.20961	6.93455	6.81455	[K].LNPPPAPPARSPTTELSSK.[S]	1xPhospho [S11]; 1xTMTpro [K19]; 1xTMTpro [N-Term]	P0C7L0 [382-400]	P0C7L0 1xPhospho [S392]	1	PPAPPARsPTTELSS	Wipf3
P10637	sPSASk.P10637	1	sPSASk	1.33e-05	7.62468	7.37565	7.96003	7.40539	7.35759	6.80428	6.83836	6.67438	7.03252	6.84519	6.19789	6.16779	6.45235	6.66256	5.82136	6.61553	5.96852	6.19698	6.29952	6.63567	[K].SPSASK.[S]	1xPhospho [S1]; 1xTMTpro [K6]; 1xTMTpro [N-Term]	P10637 [527-532]	P10637 1xPhospho [S527]	1	_______sPSASK__	Mapt
P10637	GAAsPAQk.P10637	2	GAAsPAQk	0.00168507	9.91703	9.04258	9.20578	9.32604	8.91122	9.74261	10.2071	10.1721	10.1607	9.84918	9.52861	7.9001	9.49031	9.9235	8.93935	8.54445	8.05524	7.91914	8.89468	8.38752	[R].GAASPAQK.[G]	1xPhospho [S4]; 1xTMTpro [K8]; 1xTMTpro [N-Term]	P10637 [448-455]	P10637 1xPhospho [S451]	1	____GAAsPAQK___	Mapt
P10637	IPAkTtPSPktPPGSGEPPkSGER.P10637	5	IPAkTtPSPktPPGSGEPPkSGER	9.18e-06	6.33832	6.57715	6.67681	6.41684	7.01499	6.043	5.58913	4.86908	5.54531	6.28713	5.23586	5.35408	5.11811	4.7303	4.89536	4.83031	4.56429	4.73927	4.55505	5.03746	[R].IPAKTTPSPKTPPGSGEPPKSGER.[S]	2xPhospho [T6; T11]; 3xTMTpro [K4; K10; K20]; 1xTMTpro [N-Term]	P10637 [463-486]	P10637 2xPhospho [T468; T473]	2	__IPAKTtPSPKtPP	Mapt
P10637	SRtPSLPTPPTR.P10637	5	SRtPSLPTPPTR	0.000195051	6.64288	6.38102	6.7844	6.88377	6.71127	6.17926	6.27475	6.75162	6.53662	6.20265	5.83996	5.81951	6.29379	6.22401	5.98386	5.79799	5.87636	5.87001	6.0479	6.0011	[R].SRTPSLPTPPTR.[E]	1xPhospho [T3]; 1xTMTpro [N-Term]	P10637 [502-513]	P10637 1xPhospho [T504]	1	_____SRtPSLPTPP	Mapt
P10637	IGsLDNITHVPGGGNk.P10637	5	IGsLDNITHVPGGGNk	0.00779816	7.91697	7.9458	7.62142	7.43778	7.90849	8.51737	8.16181	7.47875	8.1624	8.12451	7.72208	7.50635	8.06659	8.23306	7.00236	7.01664	7.15063	6.9193	7.49872	7.12256	[K].IGSLDNITHVPGGGNK.[K]	1xPhospho [S3]; 1xTMTpro [K16]; 1xTMTpro [N-Term]	P10637 [646-661]	P10637 1xPhospho [S648]	1	_____IGsLDNITHV	Mapt
P10637	IGsLDNITHVPGGGNkk.P10637	5	IGsLDNITHVPGGGNkk	0.00321473	7.93446	7.94031	7.53412	7.53579	7.73357	8.54481	8.08399	7.26683	7.77283	7.78091	7.59961	7.35662	7.59306	7.53948	7.238	6.56142	6.83192	6.63241	7.4634	7.17539	[K].IGSLDNITHVPGGGNKK.[I]	1xPhospho [S3]; 2xTMTpro [K16; K17]; 1xTMTpro [N-Term]	P10637 [646-662]	P10637 1xPhospho [S648]	1	_____IGsLDNITHV	Mapt
P10637	TPPksPSASk.P10637	5	TPPksPSASk	1.8e-06	8.51427	8.38024	8.28798	8.28469	8.16079	8.51998	8.70577	8.52223	8.4019	8.42774	7.75229	6.98788	7.60059	7.69303	7.24509	6.78322	6.96107	7.11248	7.56802	7.27162	[R].TPPKSPSASK.[S]	1xPhospho [S5]; 2xTMTpro [K4; K10]; 1xTMTpro [N-Term]	P10637 [523-532]	P10637 1xPhospho [S527]	1	___TPPKsPSASK__	Mapt
P10637	tPPGSGEPPk.P10637	1	tPPGSGEPPk	0.0204992	8.64446	8.80443	9.84453	8.6962	8.50981	8.56644	8.06047	8.23743	8.55567	8.42472	7.96718	8.30706	8.40256	8.08706	8.21004	8.37145	8.14599	7.79811	8.02838	8.58331	[K].TPPGSGEPPK.[S]	1xPhospho [T1]; 1xTMTpro [K10]; 1xTMTpro [N-Term]	P10637 [473-482]	P10637 1xPhospho [T473]	1	_______tPPGSGEP	Mapt
P11499	IEDVGsDEEDDSGkDkk.P11499	NA	IEDVGsDEEDDSGkDkk	0.347065	6.94731	6.68438	6.92901	6.84177	6.65586	6.67858	7.26048	7.50727	7.11537	6.99523	6.61515	6.45671	7.70512	7.36854	7.55464	7.16576	7.13221	6.88469	7.85448	7.255	[K].IEDVGSDEEDDSGKDKK.[K]	1xPhospho [S6]; 3xTMTpro [K14; K16; K17]; 1xTMTpro [N-Term]	P11499 [250-266]	P11499 1xPhospho [S255]	1	__IEDVGsDEEDDSG	Hsp90ab1
P11499	EIsDDEAEEEk.P11499	1	EIsDDEAEEEk	0.000937767	8.19422	7.90512	8.87726	8.4683	7.99825	7.57335	7.63193	7.53231	7.47029	7.65219	7.28173	7.77257	7.63355	7.60855	7.47823	7.76902	7.47318	7.43774	7.35427	7.80502	[K].EISDDEAEEEK.[G]	1xPhospho [S3]; 1xTMTpro [K11]; 1xTMTpro [N-Term]	P11499 [224-234]	P11499 1xPhospho [S226]	1	_____EIsDDEAEEE	Hsp90ab1
P11499	IEDVGsDEEDDSGk.P11499	1	IEDVGsDEEDDSGk	0.00029966	7.73942	7.66516	8.38423	8.06157	7.50658	6.97175	7.10251	7.03718	7.01321	7.06895	6.96022	7.26761	7.39701	7.11941	7.06385	7.26757	6.99998	6.99391	7.0582	7.49722	[K].IEDVGSDEEDDSGK.[D]	1xPhospho [S6]; 1xTMTpro [K14]; 1xTMTpro [N-Term]	P11499 [250-263]	P11499 1xPhospho [S255]	1	__IEDVGsDEEDDSG	Hsp90ab1
P11798	NFsGGk.P11798	3	NFsGGk	9.98e-09	7.71696	7.78713	7.2118	7.31919	8.01785	9.10437	9.05638	10.1252	9.61859	9.8382	10.8509	11.1212	11.8134	11.976	12.4583	12.241	11.9915	11.8579	12.5665	12.5807	[R].NFSGGK.[S]	1xPhospho [S3]; 1xTMTpro [K6]; 1xTMTpro [N-Term]	P11798 [312-317]	P11798 1xPhospho [S314]	1	_____NFsGGK____	Camk2a
P11798	HPWIsHR.P11798	3	HPWIsHR	6.13e-06	3.52661	3.96697	4.22393	4.23667	4.0581	3.82344	3.62274	3.90046	3.2136	3.69373	4.3875	4.61681	4.78891	5.11017	5.79314	7.1228	5.92151	5.4145	6.15923	6.58623	[K].HPWISHR.[S]	1xPhospho [S5]; 1xTMTpro [N-Term]	P11798 [268-274]	P11798 1xPhospho [S272]	1	___HPWIsHR_____	Camk2a
P11881	REsLTSFGNGPLSPGGPSkPGGGGGGPGSSSTSR.P11881	6	REsLTSFGNGPLSPGGPSkPGGGGGGPGSSSTSR	0.000353312	5.41534	5.36883	5.32253	5.49988	5.27834	5.13965	5.25472	4.83767	5.24254	5.12164	5.37778	5.62824	5.89597	5.79474	6.06642	5.77521	5.57162	5.68248	6.16334	5.87139	[R].RESLTSFGNGPLSPGGPSKPGGGGGGPGSSSTSR.[G]	1xPhospho [S3]; 1xTMTpro [K19]; 1xTMTpro [N-Term]	P11881 [1753-1786]	P11881 1xPhospho [S1755]	1	_____REsLTSFGNG	Itpr1
P12367	RVsVcAETFNPDEEEEDNDPRVVHPk.P12367	6	RVsVcAETFNPDEEEEDNDPRVVHPk	0.032361	6.14443	6.34905	6.69416	6.46272	7.05413	6.30624	5.68011	5.45698	5.97125	6.68075	6.5173	6.75122	6.43401	6.2509	6.56823	6.54174	6.72061	6.79638	6.58882	6.87947	[R].RVSVCAETFNPDEEEEDNDPRVVHPK.[T]	1xCarbamidomethyl [C5]; 1xPhospho [S3]; 1xTMTpro [K26]; 1xTMTpro [N-Term]	P12367 [94-119]	P12367 1xPhospho [S96]	1	_____RVsVCAETFN	Prkar2a
P12367	RVsVcAETFNPDEEEEDNDPR.P12367	4	RVsVcAETFNPDEEEEDNDPR	0.227679	3.94654	4.20489	4.58708	3.83625	3.64715	4.05994	4.40427	4.0247	4.51639	4.54207	4.18141	4.28317	4.2349	4.34356	4.47725	4.49656	4.41779	3.89754	4.61707	4.80438	[R].RVSVCAETFNPDEEEEDNDPR.[V]	1xCarbamidomethyl [C5]; 1xPhospho [S3]; 1xTMTpro [N-Term]	P12367 [94-114]	P12367 1xPhospho [S96]	1	_____RVsVCAETFN	Prkar2a
P12382	TLsIDkGF.P12382	3	TLsIDkGF	1.64e-08	6.83513	6.57792	7.57923	7.35182	7.55243	7.4437	7.70433	7.79408	8.05531	8.19023	8.83962	9.06357	8.90339	8.80122	9.13057	9.99242	10.0259	9.91698	10.2845	9.9388	[R].TLSIDKGF.[-]	1xPhospho [S3]; 1xTMTpro [K6]; 1xTMTpro [N-Term]	P12382 [773-780]	P12382 1xPhospho [S775]	1	_____TLsIDKGF__	Pfkl
P12382	RTLsIDkGF.P12382	3	RTLsIDkGF	2.45e-08	7.49567	7.36379	7.85597	7.75119	8.0142	7.83436	7.84715	7.79576	8.25845	8.4512	8.7494	9.02945	8.81674	8.79761	9.00613	9.71372	9.68088	9.7246	10.0867	9.81899	[R].RTLSIDKGF.[-]	1xPhospho [S4]; 1xTMTpro [K7]; 1xTMTpro [N-Term]	P12382 [772-780]	P12382 1xPhospho [S775]	1	____RTLsIDKGF__	Pfkl
P13595	APPASkAsPAPTPTPAGAASPLAAVAAPATDAPQAk.P13595	NA	APPASkAsPAPTPTPAGAASPLAAVAAPATDAPQAk	0.838736	6.3854	6.28355	7.16026	7.16953	7.13692	6.72236	6.63999	6.5892	7.04323	7.03178	6.6273	6.83755	6.73395	6.66811	6.58418	6.80052	6.87965	6.87449	6.38943	6.61774	[K].APPASKASPAPTPTPAGAASPLAAVAAPATDAPQAK.[Q]	1xPhospho [S8]; 2xTMTpro [K6; K36]; 1xTMTpro [N-Term]	P13595 [939-974]	P13595 1xPhospho [S946]	1	APPASKAsPAPTPTP	Ncam1
P13595	GPDPEPTQPGTVkNPPEAATAPAsPk.P13595	5	GPDPEPTQPGTVkNPPEAATAPAsPk	0.0468879	6.52548	5.97584	6.7826	6.79822	6.46564	6.52623	6.46762	5.94573	6.04468	6.67277	6.2532	5.46515	6.37965	6.13218	6.03492	6.07499	6.00878	5.86029	5.83804	6.00929	[K].GPDPEPTQPGTVKNPPEAATAPASPK.[S]	1xPhospho [S24]; 2xTMTpro [K13; K26]; 1xTMTpro [N-Term]	P13595 [982-1007]	P13595 1xPhospho [S1005]	1	EAATAPAsPK_____	Ncam1
P13595	QEAPSTkGPDPEPTQPGTVkNPPEAATAPAsPk.P13595	1	QEAPSTkGPDPEPTQPGTVkNPPEAATAPAsPk	0.0470703	6.96703	7.12135	7.47012	7.6482	7.96218	7.36722	6.31478	5.7557	6.46534	7.35091	6.99197	6.95021	6.70058	6.62808	6.69593	6.67651	6.46647	6.84901	6.46813	6.98415	[K].QEAPSTKGPDPEPTQPGTVKNPPEAATAPASPK.[S]	1xPhospho [S31]; 3xTMTpro [K7; K20; K33]; 1xTMTpro [N-Term]	P13595 [975-1007]	P13595 1xPhospho [S1005]	1	EAATAPAsPK_____	Ncam1
P13595	NPPEAATAPAsPk.P13595	NA	NPPEAATAPAsPk	0.473829	5.56371	5.12816	5.44755	5.8144	5.7963	5.48356	5.61927	5.79362	6.10707	5.7715	5.36551	5.65506	5.92938	5.87501	6.40522	5.92571	5.63865	5.79629	5.61647	5.07912	[K].NPPEAATAPASPK.[S]	1xPhospho [S11]; 1xTMTpro [K13]; 1xTMTpro [N-Term]	P13595 [995-1007]	P13595 1xPhospho [S1005]	1	EAATAPAsPK_____	Ncam1
P13595	NPPEAATAPAsPkSk.P13595	1	NPPEAATAPAsPkSk	0.0122255	5.67653	5.86584	6.22013	6.34819	6.72477	5.69919	4.54993	3.73496	4.97048	5.71591	5.67816	5.4143	5.19817	5.06969	5.14858	5.06034	5.34806	5.4554	5.1729	5.46247	[K].NPPEAATAPASPKSK.[A]	1xPhospho [S11]; 2xTMTpro [K13; K15]; 1xTMTpro [N-Term]	P13595 [995-1009]	P13595 1xPhospho [S1005]	1	EAATAPAsPKSK___	Ncam1
P13595	TEEERtPNHDGGk.P13595	5	TEEERtPNHDGGk	1.15e-05	7.28272	6.91114	7.0275	7.31486	6.6325	5.6345	6.50729	6.98799	6.63933	6.01873	5.55752	5.31564	6.07861	6.20062	6.01557	5.11155	4.88806	4.77422	5.23271	5.01422	[R].TEEERTPNHDGGK.[H]	1xPhospho [T6]; 1xTMTpro [K13]; 1xTMTpro [N-Term]	P13595 [783-795]	P13595 1xPhospho [T788]	1	__TEEERtPNHDGGK	Ncam1
P13595	GVTASSSsPASAPk.P13595	2	GVTASSSsPASAPk	0.000153302	8.25478	8.09925	8.41394	8.28338	7.6721	7.96128	8.34084	8.16324	8.18327	8.14151	7.57671	7.25861	8.10011	7.96733	8.18015	7.28277	6.99557	7.03996	7.27345	7.19511	[K].GVTASSSSPASAPK.[V]	1xPhospho [S8]; 1xTMTpro [K14]; 1xTMTpro [N-Term]	P13595 [880-893]	P13595 1xPhospho [S887]	1	GVTASSSsPASAPK_	Ncam1
P13595	tPNHDGGk.P13595	1	tPNHDGGk	4.29e-09	7.37197	6.98147	7.55497	7.55914	7.05866	5.72012	5.70365	5.33581	5.88546	5.75355	5.26361	5.39	5.376	5.547	5.26808	5.15966	4.73282	4.99462	4.85581	4.80938	[R].TPNHDGGK.[H]	1xPhospho [T1]; 1xTMTpro [K8]; 1xTMTpro [N-Term]	P13595 [788-795]	P13595 1xPhospho [T788]	1	_______tPNHDGGK	Ncam1
P13595	DEskEPIVEVR.P13595	1	DEskEPIVEVR	0.000263039	8.39897	8.02815	8.78311	8.53261	7.88227	7.53891	7.61446	7.51689	7.8067	7.68164	7.2332	7.63861	7.7708	7.55172	7.50837	7.67922	7.18038	7.14936	7.36771	7.50888	[K].DESKEPIVEVR.[T]	1xPhospho [S3]; 1xTMTpro [K4]; 1xTMTpro [N-Term]	P13595 [772-782]	P13595 1xPhospho [S774]	1	_____DEsKEPIVEV	Ncam1
P14873	TPQASTYsYETSDR.P14873	5	TPQASTYsYETSDR	0.012635	6.92988	6.90835	7.14618	6.96989	6.84087	7.34942	7.1591	6.71772	7.16984	7.03063	6.5195	6.23902	6.77119	6.74392	6.39105	6.05061	6.50576	6.7758	7.07445	6.51416	[K].TPQASTYSYETSDR.[C]	1xPhospho [S8]; 1xTMTpro [N-Term]	P14873 [2047-2060]	P14873 1xPhospho [S2054]	1	TPQASTYsYETSDR_	Map1b
P14873	EVSSkEEQsPVkAEVAEk.P14873	2	EVSSkEEQsPVkAEVAEk	0.00131696	8.1158	7.30558	8.23567	7.99517	7.22615	7.71024	8.95216	9.02414	8.91776	8.31806	6.91059	6.48877	7.51286	7.61617	7.55243	7.34749	7.29902	7.02106	7.37239	6.89913	[K].EVSSKEEQSPVKAEVAEK.[Q]	1xPhospho [S9]; 3xTMTpro [K5; K12; K18]; 1xTMTpro [N-Term]	P14873 [606-623]	P14873 1xPhospho [S614]	1	VSSKEEQsPVKAEVA	Map1b
P14873	GEAEQsEEEGEEEDkAEDAR.P14873	1	GEAEQsEEEGEEEDkAEDAR	0.000661658	8.33156	8.22956	9.14847	8.49177	7.67759	7.13462	6.27393	6.86009	7.21915	7.22373	6.56436	7.41259	7.07952	6.56617	6.94993	7.71965	7.73718	7.13038	6.77886	7.77702	[K].GEAEQSEEEGEEEDKAEDAR.[E]	1xPhospho [S6]; 1xTMTpro [K15]; 1xTMTpro [N-Term]	P14873 [1008-1027]	P14873 1xPhospho [S1013]	1	__GEAEQsEEEGEEE	Map1b
P14873	TIktPEDGGYTcEITEk.P14873	5	TIktPEDGGYTcEITEk	6.16e-09	10.1551	9.98383	9.8801	9.95194	9.66833	9.74934	9.93673	9.53827	10.0403	10.1163	8.63609	8.07992	8.22424	8.49951	8.19148	7.71877	8.0796	7.92063	8.25346	7.83166	[K].TIKTPEDGGYTCEITEK.[T]	1xCarbamidomethyl [C12]; 1xPhospho [T4]; 2xTMTpro [K3; K17]; 1xTMTpro [N-Term]	P14873 [1925-1941]	P14873 1xPhospho [T1928]	1	____TIKtPEDGGYT	Map1b
P14873	tAkSRtPVQDHR.P14873	5	tAkSRtPVQDHR	2.04e-08	7.16721	6.68927	6.68493	6.528	6.36338	6.49504	6.77569	5.94918	6.33887	6.41602	4.63688	4.17216	4.7453	4.71906	4.8916	3.93908	4.17988	4.51291	4.22575	4.60331	[K].TAKSRTPVQDHR.[S]	2xPhospho [T1; T6]; 1xTMTpro [K3]; 1xTMTpro [N-Term]	P14873 [1624-1635]	P14873 2xPhospho [T1624; T1629]	2	_______tAKSRtPV	Map1b
P14873	RSEsPFEGkNGk.P14873	1	RSEsPFEGkNGk	3.33e-07	9.20959	9.00682	8.67289	9.32836	9.493	8.19557	7.38147	6.66894	6.96289	7.84115	7.14638	6.44417	6.51873	6.36665	5.89602	6.16125	6.09117	6.12729	5.99514	6.02353	[R].RSESPFEGKNGK.[Q]	1xPhospho [S4]; 2xTMTpro [K9; K12]; 1xTMTpro [N-Term]	P14873 [1419-1430]	P14873 1xPhospho [S1422]	1	____RSEsPFEGKNG	Map1b
P14873	RSEsPFEGk.P14873	5	RSEsPFEGk	1.71e-06	11.2927	10.6443	10.5802	10.6484	9.94387	9.98066	10.6894	10.4333	10.2792	9.91997	9.05479	7.31096	8.57257	9.01075	7.62504	7.38729	7.54913	7.61641	8.05782	7.89535	[R].RSESPFEGK.[N]	1xPhospho [S4]; 1xTMTpro [K9]; 1xTMTpro [N-Term]	P14873 [1419-1427]	P14873 1xPhospho [S1422]	1	____RSEsPFEGK__	Map1b
P14873	GEAEQsEEEGEEEDk.P14873	1	GEAEQsEEEGEEEDk	0.0042195	7.14592	6.98595	8.5348	7.44593	6.36691	6.2178	6.04881	6.00539	6.76019	6.44973	5.7483	6.43275	5.89615	5.77708	6.19693	6.21116	6.1531	6.1302	5.67539	6.47291	[K].GEAEQSEEEGEEEDK.[A]	1xPhospho [S6]; 1xTMTpro [K15]; 1xTMTpro [N-Term]	P14873 [1008-1022]	P14873 1xPhospho [S1013]	1	__GEAEQsEEEGEEE	Map1b
P14873	DVSDERLsPAk.P14873	1	DVSDERLsPAk	1.38e-06	8.53396	8.65138	8.7823	8.48907	8.38498	7.52013	7.41817	7.29615	7.88268	7.73026	6.78922	7.35315	7.46586	6.88799	7.07953	6.86547	7.41581	6.79603	7.15169	7.25052	[K].DVSDERLSPAK.[S]	1xPhospho [S8]; 1xTMTpro [K11]; 1xTMTpro [N-Term]	P14873 [1240-1250]	P14873 1xPhospho [S1247]	1	DVSDERLsPAK____	Map1b
P14873	ksPSEARQDVDLcLVSScEFk.P14873	2	ksPSEARQDVDLcLVSScEFk	0.00155433	6.32495	5.71581	6.53533	6.10401	5.9736	6.2614	6.68881	6.45848	7.17257	6.46432	5.34092	5.54697	6.04496	6.00708	5.93545	5.69383	5.4833	5.1802	5.90548	5.7656	[K].KSPSEARQDVDLCLVSSCEFK.[H]	2xCarbamidomethyl [C13; C18]; 1xPhospho [S2]; 2xTMTpro [K1; K21]; 1xTMTpro [N-Term]	P14873 [2067-2087]	P14873 1xPhospho [S2068]	1	______KsPSEARQD	Map1b
P14873	tPVQDHR.P14873	5	tPVQDHR	4.29e-09	8.34825	8.13105	8.43408	8.41926	8.33674	6.69631	6.57572	5.98489	7.08415	6.6677	5.60962	5.19126	5.21788	5.66482	4.87406	4.89407	5.21952	5.18785	4.82554	5.35736	[R].TPVQDHR.[S]	1xPhospho [T1]; 1xTMTpro [N-Term]	P14873 [1629-1635]	P14873 1xPhospho [T1629]	1	_______tPVQDHR_	Map1b
P14873	LGGDVsPTQIDVSQFGSFk.P14873	5	LGGDVsPTQIDVSQFGSFk	0.00032058	4.38442	4.81419	5.0882	4.80618	4.65315	3.79705	3.76049	3.52835	4.78163	4.32248	3.4181	2.69883	3.47222	3.60966	3.234	3.25064	3.37651	2.38859	3.66627	3.61635	[K].LGGDVSPTQIDVSQFGSFK.[E]	1xPhospho [S6]; 1xTMTpro [K19]; 1xTMTpro [N-Term]	P14873 [1492-1510]	P14873 1xPhospho [S1497]	1	__LGGDVsPTQIDVS	Map1b
P14873	tPEDGGYTcEITEk.P14873	1	tPEDGGYTcEITEk	0.000245824	7.61091	7.40725	8.42257	7.3932	7.12059	7.14847	6.94454	6.89202	7.16517	6.94843	6.5235	6.46548	6.69367	6.61455	6.57598	6.47034	6.58416	6.43982	6.50588	6.92782	[K].TPEDGGYTCEITEK.[T]	1xCarbamidomethyl [C9]; 1xPhospho [T1]; 1xTMTpro [K14]; 1xTMTpro [N-Term]	P14873 [1928-1941]	P14873 1xPhospho [T1928]	1	_______tPEDGGYT	Map1b
P14873	FsPEVPGQk.P14873	1	FsPEVPGQk	9.17e-07	5.11203	5.05439	5.25589	5.49078	5.25846	4.54637	4.69826	4.65476	5.3288	4.74285	3.59643	4.32379	3.94127	3.75399	3.64864	3.79596	3.62296	3.8651	3.96435	3.83683	[R].FSPEVPGQK.[I]	1xPhospho [S2]; 1xTMTpro [K9]; 1xTMTpro [N-Term]	P14873 [90-98]	P14873 1xPhospho [S91]	1	______FsPEVPGQK	Map1b
P14873	QPGIQsPSR.P14873	1	QPGIQsPSR	3.3e-07	9.00534	8.83244	9.76642	9.37928	8.58531	7.65388	7.52821	7.27056	8.10203	7.96441	7.04199	7.16667	7.00334	6.71956	6.94356	7.0091	6.91775	7.02068	6.51109	6.83992	[K].QPGIQSPSR.[E]	1xPhospho [S6]; 1xTMTpro [N-Term]	P14873 [1068-1076]	P14873 1xPhospho [S1073]	1	__QPGIQsPSR____	Map1b
P14873	TPLGERsVNFSLTPNEIk.P14873	5	TPLGERsVNFSLTPNEIk	3.63e-06	6.19435	5.4547	6.2986	6.04476	5.74553	5.63186	6.30747	5.92954	6.12553	5.78338	4.77915	4.98045	4.94856	5.08083	5.07697	4.60674	4.85219	4.65682	4.99158	4.81503	[K].TPLGERSVNFSLTPNEIK.[V]	1xPhospho [S7]; 1xTMTpro [K18]; 1xTMTpro [N-Term]	P14873 [1265-1282]	P14873 1xPhospho [S1271]	1	_TPLGERsVNFSLTP	Map1b
P14873	DLTGQVPtPPVk.P14873	5	DLTGQVPtPPVk	1.62e-05	8.18949	7.58262	7.51448	7.55528	7.4686	7.63303	8.0422	7.64831	7.68611	7.66259	6.56675	5.95467	6.70448	7.0644	6.94457	6.35541	6.47309	6.22507	6.64542	6.68038	[K].DLTGQVPTPPVK.[Q]	1xPhospho [T8]; 1xTMTpro [K12]; 1xTMTpro [N-Term]	P14873 [520-531]	P14873 1xPhospho [T527]	1	DLTGQVPtPPVK___	Map1b
P14873	TTRtPEVSGYTYEk.P14873	5	TTRtPEVSGYTYEk	9.15e-07	8.92416	8.7019	8.38039	8.32029	7.74724	7.91464	8.27228	8.26245	7.86019	7.69714	7.03725	5.92776	6.49438	6.54144	6.38958	5.52173	5.98799	5.84006	6.57045	6.36009	[K].TTRTPEVSGYTYEK.[T]	1xPhospho [T4]; 1xTMTpro [K14]; 1xTMTpro [N-Term]	P14873 [1959-1972]	P14873 1xPhospho [T1962]	1	____TTRtPEVSGYT	Map1b
P14873	TTRtPEVSGYTYEkTER.P14873	1	TTRtPEVSGYTYEkTER	5.29e-06	7.89547	8.63015	8.11702	8.4339	8.79304	7.38312	6.66681	6.6283	7.03218	7.40468	7.24255	6.66812	6.51625	6.5703	6.52932	6.87908	6.90946	6.7008	6.53218	6.56111	[K].TTRTPEVSGYTYEKTER.[S]	1xPhospho [T4]; 1xTMTpro [K14]; 1xTMTpro [N-Term]	P14873 [1959-1975]	P14873 1xPhospho [T1962]	1	____TTRtPEVSGYT	Map1b
P14873	EEQsPVk.P14873	1	EEQsPVk	4.25e-06	9.50776	9.09757	9.75144	9.43103	8.56984	8.17414	7.63405	7.69526	8.19928	8.13214	7.35537	7.57429	7.69702	7.57546	7.5634	8.1034	7.80214	7.46818	7.57777	7.89081	[K].EEQSPVK.[A]	1xPhospho [S4]; 1xTMTpro [K7]; 1xTMTpro [N-Term]	P14873 [611-617]	P14873 1xPhospho [S614]	1	____EEQsPVK____	Map1b
P14873	kEskEETPEVTk.P14873	2	kEskEETPEVTk	0.000221053	9.47079	8.94282	9.10073	9.01603	8.57769	9.73687	10.328	9.99196	9.85724	9.68219	8.80371	8.03514	9.08662	9.06551	9.00135	8.52258	8.74105	8.33612	8.98032	8.7185	[R].KESKEETPEVTK.[T]	1xPhospho [S3]; 3xTMTpro [K1; K4; K12]; 1xTMTpro [N-Term]	P14873 [559-570]	P14873 1xPhospho [S561]	1	_____KEsKEETPEV	Map1b
P14873	QGFPDREsPVSDLTSTGLYQDk.P14873	5	QGFPDREsPVSDLTSTGLYQDk	0.00225369	5.48814	5.50828	6.01213	5.64869	5.58842	5.00143	5.14072	5.55986	6.15626	5.65999	4.56065	4.65851	4.93634	5.0138	5.16902	4.18673	4.93012	4.86455	5.0185	4.90112	[K].QGFPDRESPVSDLTSTGLYQDK.[Q]	1xPhospho [S8]; 1xTMTpro [K22]; 1xTMTpro [N-Term]	P14873 [1431-1452]	P14873 1xPhospho [S1438]	1	QGFPDREsPVSDLTS	Map1b
P14873	ASAELDIkDVsDER.P14873	5	ASAELDIkDVsDER	0.0551938	7.1542	7.05572	7.39547	7.33565	7.26865	7.02816	7.42228	7.53721	7.55741	7.24612	6.47209	7.02258	7.03253	6.93377	7.27426	7.17929	7.36334	7.01276	7.41038	7.37606	[K].ASAELDIKDVSDER.[L]	1xPhospho [S11]; 1xTMTpro [K8]; 1xTMTpro [N-Term]	P14873 [1232-1245]	P14873 1xPhospho [S1242]	1	ELDIKDVsDER____	Map1b
P14873	TPQASTYSYETSDRcYTTEkksPSEAR.P14873	5	TPQASTYSYETSDRcYTTEkksPSEAR	0.00758756	6.54989	7.69848	6.72081	6.83477	6.89059	6.58492	4.64342	4.32404	6.75112	6.47983	5.53532	6.3162	5.12221	5.05375	5.47175	4.41236	5.00336	5.72343	5.04634	4.88212	[K].TPQASTYSYETSDRCYTTEKKSPSEAR.[Q]	1xCarbamidomethyl [C15]; 1xPhospho [S22]; 2xTMTpro [K20; K21]; 1xTMTpro [N-Term]	P14873 [2047-2073]	P14873 1xPhospho [S2068]	1	CYTTEKKsPSEAR__	Map1b
P14873	QDVDLcLVSscEFkHPk.P14873	5	QDVDLcLVSscEFkHPk	2.18e-05	7.00845	6.37108	6.92664	6.33005	6.87388	6.66835	7.22208	6.99559	7.34022	6.90671	5.91506	5.6896	6.20357	6.09563	5.81021	5.70944	5.79585	5.62772	6.23164	5.91445	[R].QDVDLCLVSSCEFKHPK.[T]	2xCarbamidomethyl [C6; C11]; 1xPhospho [S10]; 2xTMTpro [K14; K17]; 1xTMTpro [N-Term]	P14873 [2074-2090]	P14873 1xPhospho [S2083]	1	VDLCLVSsCEFKHPK	Map1b
P14873	LGGDVsPTQIDVSQFGSFkEDTk.P14873	5	LGGDVsPTQIDVSQFGSFkEDTk	1.97e-07	6.80376	6.68565	6.44156	6.65976	6.54502	6.11464	6.32085	5.60923	6.34201	6.40526	4.59507	4.19858	4.71633	4.80766	4.48624	3.2358	3.9307	3.95872	4.74175	4.47219	[K].LGGDVSPTQIDVSQFGSFKEDTK.[M]	1xPhospho [S6]; 2xTMTpro [K19; K23]; 1xTMTpro [N-Term]	P14873 [1492-1514]	P14873 1xPhospho [S1497]	1	__LGGDVsPTQIDVS	Map1b
P14873	tPLGER.P14873	1	tPLGER	7.24e-08	9.02828	9.26588	10.2601	9.25317	8.42285	7.5785	7.15144	6.75669	7.63662	7.42428	6.25837	6.00921	6.05566	6.07447	5.39261	5.587	5.63205	5.68225	5.33427	6.07629	[K].TPLGER.[S]	1xPhospho [T1]; 1xTMTpro [N-Term]	P14873 [1265-1270]	P14873 1xPhospho [T1265]	1	_______tPLGER__	Map1b
P14873	SEsPFEGk.P14873	5	SEsPFEGk	1.21e-06	9.75685	9.25897	9.61709	9.30959	8.60414	8.09509	8.43872	8.53679	8.73026	8.1284	7.29913	5.86781	7.17429	7.281	6.16506	5.84457	6.07472	5.44938	6.44032	6.80634	[R].SESPFEGK.[N]	1xPhospho [S3]; 1xTMTpro [K8]; 1xTMTpro [N-Term]	P14873 [1420-1427]	P14873 1xPhospho [S1422]	1	_____SEsPFEGK__	Map1b
P14873	AEtEEAEEPEEDGEDNASGSASk.P14873	1	AEtEEAEEPEEDGEDNASGSASk	0.000445238	6.3199	6.08908	7.76594	6.96467	5.66607	4.95549	4.8247	4.94291	5.42923	5.25001	4.68503	5.34294	4.6636	4.28089	5.07623	5.16391	5.1939	4.82952	4.79084	5.38087	[K].AETEEAEEPEEDGEDNASGSASK.[H]	1xPhospho [T3]; 1xTMTpro [K23]; 1xTMTpro [N-Term]	P14873 [943-965]	P14873 1xPhospho [T945]	1	_____AEtEEAEEPE	Map1b
P14873	ASAELDIkDVSDERLsPAk.P14873	2	ASAELDIkDVSDERLsPAk	8.53e-05	6.91374	6.59521	6.80354	6.55579	6.83531	6.68019	7.28984	7.48084	7.0332	6.83446	5.87503	5.56344	6.25222	6.27455	6.30182	5.94658	6.12423	5.69232	6.22576	6.20125	[K].ASAELDIKDVSDERLSPAK.[S]	1xPhospho [S16]; 2xTMTpro [K8; K19]; 1xTMTpro [N-Term]	P14873 [1232-1250]	P14873 1xPhospho [S1247]	1	DVSDERLsPAK____	Map1b
P14873	SRtPVQDHR.P14873	5	SRtPVQDHR	7.6e-09	8.9909	8.95159	8.92752	8.92125	8.85282	8.32102	8.3068	7.74599	8.35347	8.29958	7.07126	6.09501	6.19145	6.91225	5.85178	5.91696	5.89975	5.97997	5.99678	6.11582	[K].SRTPVQDHR.[S]	1xPhospho [T3]; 1xTMTpro [N-Term]	P14873 [1627-1635]	P14873 1xPhospho [T1629]	1	_____SRtPVQDHR_	Map1b
P14873	ESVVsGDDR.P14873	1	ESVVsGDDR	1.12e-07	8.06537	7.8275	8.41911	8.36376	7.76639	6.77983	6.69689	6.43288	7.24237	6.9231	6.27708	6.32163	6.43197	6.20598	6.05174	6.264	6.36574	6.41519	6.29902	6.59665	[R].ESVVSGDDR.[A]	1xPhospho [S5]; 1xTMTpro [N-Term]	P14873 [988-996]	P14873 1xPhospho [S992]	1	___ESVVsGDDR___	Map1b
P14873	DAYcsEEkELk.P14873	7	DAYcsEEkELk	0.0038249	7.53123	6.95939	7.40892	7.37499	6.72446	7.94161	8.88903	8.93481	8.48797	8.05809	7.15593	6.50984	7.70837	7.93094	7.90457	7.5004	7.66555	6.84528	7.69749	7.38752	[R].DAYCSEEKELK.[A]	1xCarbamidomethyl [C4]; 1xPhospho [S5]; 2xTMTpro [K8; K11]; 1xTMTpro [N-Term]	P14873 [1221-1231]	P14873 1xPhospho [S1225]	1	___DAYCsEEKELK_	Map1b
P14873	REsVVSGDDR.P14873	1	REsVVSGDDR	0.00878703	6.62025	6.90563	7.69264	6.95149	6.17454	6.49882	6.18992	5.80333	6.80593	6.71063	5.57979	5.94075	6.00003	6.02079	5.96347	6.38863	6.11421	5.70278	5.38359	6.07957	[K].RESVVSGDDR.[A]	1xPhospho [S3]; 1xTMTpro [N-Term]	P14873 [987-996]	P14873 1xPhospho [S989]	1	_____REsVVSGDDR	Map1b
P14873	TESkPSVTEkEVSSkEEQsPVkAEVAEk.P14873	2	TESkPSVTEkEVSSkEEQsPVkAEVAEk	0.000667375	6.09481	5.43038	6.69229	6.06908	5.39494	5.97946	7.02994	6.67829	7.33617	6.85369	5.18892	5.30039	5.40963	5.72006	5.69	5.52858	5.59955	5.51844	5.59564	5.32613	[K].TESKPSVTEKEVSSKEEQSPVKAEVAEK.[Q]	1xPhospho [S19]; 5xTMTpro [K4; K10; K15; K22; K28]; 1xTMTpro [N-Term]	P14873 [596-623]	P14873 1xPhospho [S614]	1	VSSKEEQsPVKAEVA	Map1b
P14873	SVNFSLtPNEIk.P14873	5	SVNFSLtPNEIk	5.52e-06	8.7936	8.18828	7.93028	7.58205	7.28953	7.65996	8.67987	8.49157	7.84985	7.26539	6.06235	4.72377	5.89843	6.25632	5.9107	4.21436	5.2466	4.79783	5.86844	5.32934	[R].SVNFSLTPNEIK.[V]	1xPhospho [T7]; 1xTMTpro [K12]; 1xTMTpro [N-Term]	P14873 [1271-1282]	P14873 1xPhospho [T1277]	1	_SVNFSLtPNEIK__	Map1b
P15864	RkAsGPPVSELITk.P15864	6	RkAsGPPVSELITk	0.0742871	6.45064	6.36851	6.84243	6.86509	7.16261	6.24726	6.49128	6.12042	6.67213	6.74824	6.50072	6.36934	6.94865	6.68602	6.7113	7.27517	6.93878	6.76756	6.95024	6.79534	[RK].RKASGPPVSELITK.[A]	1xPhospho [S4]; 2xTMTpro [K2; K14]; 1xTMTpro [N-Term]	P15864 [33-46]	P15864 1xPhospho [S36]	1	____RKAsGPPVSEL	H1-2
P15864	kAsGPPVSELITk.P15864	5	kAsGPPVSELITk	0.0176145	7.73361	7.367	7.95704	8.13009	8.17284	7.23539	7.56276	6.74328	7.52946	8.07351	6.90755	6.76346	7.37235	7.16107	7.14883	7.70394	7.46308	7.46952	7.36724	7.4663	[R].KASGPPVSELITK.[A]	1xPhospho [S3]; 2xTMTpro [K1; K13]; 1xTMTpro [N-Term]	P15864 [34-46]	P15864 1xPhospho [S36]	1	_____KAsGPPVSEL	H1-2
P16054	kALsFDNRGEEHR.P16054	3	kALsFDNRGEEHR	0.00156171	5.71469	5.99916	6.12432	6.22513	6.54547	6.35392	6.25002	6.18738	6.23952	6.34925	6.42088	6.4387	6.65181	6.6522	6.65185	6.62195	6.58518	6.59414	6.72683	6.61215	[R].KALSFDNRGEEHR.[A]	1xPhospho [S4]; 1xTMTpro [K1]; 1xTMTpro [N-Term]	P16054 [365-377]	P16054 1xPhospho [S368]	1	____KALsFDNRGEE	Prkce
P16054	ASSATDGQLAsPGENGEVRPGQAk.P16054	4	ASSATDGQLAsPGENGEVRPGQAk	0.0169323	6.35597	6.42568	6.8844	6.24625	6.57674	6.59508	6.75859	6.82073	6.93345	7.23468	6.80891	6.7809	7.07232	7.27198	7.59665	6.90022	6.94447	6.84496	6.84948	7.20352	[R].ASSATDGQLASPGENGEVRPGQAK.[R]	1xPhospho [S11]; 1xTMTpro [K24]; 1xTMTpro [N-Term]	P16054 [378-401]	P16054 1xPhospho [S388]	1	ATDGQLAsPGENGEV	Prkce
P16054	ALsFDNR.P16054	NA	ALsFDNR	0.634694	8.04256	7.9464	8.02513	7.84799	7.54821	7.77483	7.76426	7.6557	7.72407	7.63069	7.2875	7.5456	8.12719	7.98581	7.82012	7.94168	7.79638	7.46343	7.97679	8.13788	[K].ALSFDNR.[G]	1xPhospho [S3]; 1xTMTpro [N-Term]	P16054 [366-372]	P16054 1xPhospho [S368]	1	_____ALsFDNR___	Prkce
P16054	ALsFDNRGEEHR.P16054	3	ALsFDNRGEEHR	0.00137975	6.61914	6.88199	7.18649	6.94139	7.09495	7.29054	7.0532	7.00639	7.35663	7.52559	7.262	7.36418	7.6047	7.62681	7.59337	7.46162	7.31632	7.5468	7.64741	7.61653	[K].ALSFDNRGEEHR.[A]	1xPhospho [S3]; 1xTMTpro [N-Term]	P16054 [366-377]	P16054 1xPhospho [S368]	1	_____ALsFDNRGEE	Prkce
P16283	FSIGsDEDDSPGLPVk.P16283	4	FSIGsDEDDSPGLPVk	0.0940944	3.75559	3.41958	3.70389	3.9048	3.34369	3.08629	4.12676	4.43409	4.03419	3.5396	3.16627	3.45798	3.85472	4.18299	4.27426	4.41907	4.52188	3.67828	4.56944	4.56893	[K].FSIGSDEDDSPGLPVK.[A]	1xPhospho [S5]; 1xTMTpro [K16]; 1xTMTpro [N-Term]	P16283 [166-181]	P16283 1xPhospho [S170]	1	___FSIGsDEDDSPG	Slc4a3
P16330	sHTFLPk.P16330	3	sHTFLPk	6.42e-05	3.75722	3.61118	4.82737	4.25736	4.84717	3.80953	3.77372	4.3642	4.39221	4.11969	4.52993	4.88416	5.62751	4.56503	5.90233	7.40022	6.17296	5.87631	6.32192	6.26097	[K].SHTFLPK.[L]	1xPhospho [S1]; 1xTMTpro [K7]; 1xTMTpro [N-Term]	P16330 [9-15]	P16330 1xPhospho [S9]	1	_______sHTFLPK_	Cnp
P16330	ksHTFLPk.P16330	6	ksHTFLPk	0.0104395	4.24408	3.88355	3.40282	3.49366	4.31583	3.85974	2.52941	3.54754	3.0906	2.73644	3.63041	3.54465	4.31392	3.69511	4.83782	4.39843	3.755	4.48663	4.82488	5.23493	[R].KSHTFLPK.[L]	1xPhospho [S2]; 2xTMTpro [K1; K8]; 1xTMTpro [N-Term]	P16330 [8-15]	P16330 1xPhospho [S9]	1	______KsHTFLPK_	Cnp
P16546	LDPAQSAsR.P16546	5	LDPAQSAsR	0.0218452	7.90928	7.46077	7.98291	7.87087	7.58252	7.584	7.41219	7.54279	7.85648	7.58081	7.20095	7.16046	7.52276	7.69454	6.53266	7.36598	6.84749	6.6833	7.30622	7.38872	[K].LDPAQSASR.[E]	1xPhospho [S8]; 1xTMTpro [N-Term]	P16546 [1024-1032]	P16546 1xPhospho [S1031]	1	LDPAQSAsR______	Sptan1
P16546	TAsPWk.P16546	4	TAsPWk	0.029436	7.96618	7.83072	8.01099	7.87185	7.48364	8.18783	8.44641	9.02925	8.27181	8.35087	8.90901	7.78391	9.41508	9.12229	8.51808	8.75526	8.3182	8.05323	9.24245	9.10729	[K].TASPWK.[S]	1xPhospho [S3]; 1xTMTpro [K6]; 1xTMTpro [N-Term]	P16546 [1188-1193]	P16546 1xPhospho [S1190]	1	_____TAsPWK____	Sptan1
P16546	DEADSkTAsPWk.P16546	6	DEADSkTAsPWk	0.124626	5.75617	5.71963	6.53491	6.32719	6.47081	6.19707	5.74775	5.88892	5.74131	6.51189	6.91215	6.01516	6.801	6.49305	6.18691	6.69764	6.30028	6.27845	6.43836	6.7727	[R].DEADSKTASPWK.[S]	1xPhospho [S9]; 2xTMTpro [K6; K12]; 1xTMTpro [N-Term]	P16546 [1182-1193]	P16546 1xPhospho [S1190]	1	EADSKTAsPWK____	Sptan1
P16546	WRsLQQLAEER.P16546	3	WRsLQQLAEER	0.000284453	5.63931	5.81208	5.75899	6.00459	5.85838	6.06163	5.84921	5.92369	6.15901	6.34549	6.1267	6.35987	6.41951	6.3243	6.50883	6.37636	6.29929	6.15535	6.41791	6.39332	[R].WRSLQQLAEER.[S]	1xPhospho [S3]; 1xTMTpro [N-Term]	P16546 [1215-1225]	P16546 1xPhospho [S1217]	1	_____WRsLQQLAEE	Sptan1
P17182	YDLDFksPDDPSR.P17182	6	YDLDFksPDDPSR	0.0744686	6.48648	6.47119	6.56812	6.07601	6.40072	6.4329	6.47738	6.58647	6.24785	6.28124	6.41116	6.50798	6.51439	6.61626	7.35119	7.1384	6.52792	6.33939	7.33218	7.31776	[K].YDLDFKSPDDPSR.[Y]	1xPhospho [S7]; 1xTMTpro [K6]; 1xTMTpro [N-Term]	P17182 [257-269]	P17182 1xPhospho [S263]	1	_YDLDFKsPDDPSR_	Eno1
P18760	kSStPEEVkk.P18760	2	kSStPEEVkk	5.62e-05	7.17794	7.05063	7.33011	7.1823	7.34061	7.11821	7.22197	7.0812	7.33071	7.47066	6.85807	6.85648	7.14313	7.03904	7.21733	6.74541	6.51397	6.54963	6.55919	6.76856	[R].KSSTPEEVKK.[R]	1xPhospho [T4]; 3xTMTpro [K1; K9; K10]; 1xTMTpro [N-Term]	P18760 [22-31]	P18760 1xPhospho [T25]	1	____KSStPEEVKK_	Cfl1
P18760	kSStPEEVk.P18760	2	kSStPEEVk	0.00198503	6.97726	6.52827	7.0926	6.60625	7.27738	6.8862	7.59911	7.58697	7.2528	6.96269	6.55967	5.95036	6.63071	6.44332	6.69905	6.46555	6.17055	5.99145	6.72533	6.35459	[R].KSSTPEEVK.[K]	1xPhospho [T4]; 2xTMTpro [K1; K9]; 1xTMTpro [N-Term]	P18760 [22-30]	P18760 1xPhospho [T25]	1	____KSStPEEVK__	Cfl1
P19096	SRsDTSLk.P19096	2	SRsDTSLk	0.00187086	7.52903	6.89594	7.4994	7.02189	6.68645	7.31961	8.34158	8.33527	7.98552	7.46054	6.71507	5.92968	7.10716	7.07522	7.14049	6.56435	6.33968	6.26518	6.97248	6.67569	[K].SRSDTSLK.[Q]	1xPhospho [S3]; 1xTMTpro [K8]; 1xTMTpro [N-Term]	P19096 [2199-2206]	P19096 1xPhospho [S2201]	1	_____SRsDTSLK__	Fasn
P19246	SPAEPksPATVk.P19246	4	SPAEPksPATVk	0.000188349	5.95448	6.18592	5.83961	5.7623	6.01327	6.76381	7.41056	7.91912	7.37719	7.16318	6.75204	6.7555	8.13889	7.5073	8.17926	7.91841	7.50155	7.30614	8.19757	7.82153	[K].SPAEPKSPATVK.[S]	1xPhospho [S7]; 2xTMTpro [K6; K12]; 1xTMTpro [N-Term]	P19246 [577-588]	P19246 1xPhospho [S583]	1	_SPAEPKsPATVK__	Nefh
P19246	sPAEVk.P19246	3	sPAEVk	0.000129638	4.34823	4.43078	4.69991	6.02336	5.45529	4.74641	4.75521	5.30647	5.35848	4.83743	5.42424	6.28763	6.53369	5.80912	6.56672	8.0462	7.20983	6.77456	6.40697	7.12605	[K].SPAEVK.[S]	1xPhospho [S1]; 1xTMTpro [K6]; 1xTMTpro [N-Term]	P19246 [673-678]; [697-702]; [709-714]	P19246 1xPhospho [S673]; 1xPhospho [S697]; 1xPhospho [S709]	1	_______sPAEVK__	Nefh
P19246	sPAEPk.P19246	3	sPAEPk	1.38e-06	5.84669	5.9148	6.68694	5.65344	6.18691	6.42052	6.33071	7.26923	6.97652	6.92946	7.48022	8.67333	9.71262	8.23043	9.20983	10.5373	9.74537	9.33648	9.1414	10.3964	[K].SPAEPK.[S]	1xPhospho [S1]; 1xTMTpro [K6]; 1xTMTpro [N-Term]	P19246 [559-564]; [565-570]; [577-582]; [685-690]	P19246 1xPhospho [S559]; 1xPhospho [S565]; 1xPhospho [S577]; 1xPhospho [S685]	1	_______sPAEPK__	Nefh
P19246	SPAEPksPAEAk.P19246	6	SPAEPksPAEAk	0.245717	4.65112	5.16115	4.96385	5.59589	5.19428	5.02453	5.31348	5.35454	5.33196	5.42049	5.02128	5.19823	5.48675	5.06675	5.85649	5.58284	5.23104	5.21552	5.84287	5.77528	[K].SPAEPKSPAEAK.[S]	1xPhospho [S7]; 2xTMTpro [K6; K12]; 1xTMTpro [N-Term]	P19246 [565-576]; [685-696]	P19246 1xPhospho [S571]; 1xPhospho [S691]	1	_SPAEPKsPAEAK__	Nefh
P19246	SPAEVksPGEAk.P19246	4	SPAEVksPGEAk	1.53e-05	4.22381	3.8434	4.94107	4.12378	4.70486	5.41986	6.18665	6.70399	5.72405	5.69605	6.02521	5.64713	7.20593	6.60094	7.24818	7.2878	6.75535	6.73099	7.20385	6.97309	[K].SPAEVKSPGEAK.[S]	1xPhospho [S7]; 2xTMTpro [K6; K12]; 1xTMTpro [N-Term]	P19246 [673-684]; [709-720]	P19246 1xPhospho [S679]; 1xPhospho [S715]	1	_SPAEVKsPGEAK__	Nefh
P19246	AksPEkEEAk.P19246	3	AksPEkEEAk	9.42e-08	6.34202	6.26599	6.49722	6.87573	6.89488	7.78178	8.24095	9.13502	8.03984	8.28435	9.0098	9.1145	10.3587	9.59732	10.341	10.6923	10.1352	10.1995	10.3586	10.2205	[K].AKSPEKEEAK.[T]	1xPhospho [S3]; 3xTMTpro [K2; K6; K10]; 1xTMTpro [N-Term]	P19246 [865-874]	P19246 1xPhospho [S867]	1	_____AKsPEKEEAK	Nefh
P19246	AksPEkEEAkTSEk.P19246	3	AksPEkEEAkTSEk	4.1e-05	5.26037	6.15688	6.38696	6.05725	6.58087	6.85319	5.64696	5.74812	6.51909	7.7966	7.96824	9.26869	8.51894	7.48707	8.24746	9.05107	9.08899	9.81557	8.03492	9.24048	[K].AKSPEKEEAKTSEK.[V]	1xPhospho [S3]; 4xTMTpro [K2; K6; K10; K14]; 1xTMTpro [N-Term]	P19246 [865-878]	P19246 1xPhospho [S867]	1	_____AKsPEKEEAK	Nefh
P19246	SPAEAksPIEVkSPEk.P19246	3	SPAEAksPIEVkSPEk	0.00010582	5.55496	5.623	6.37691	6.44287	6.49371	6.15395	5.92218	5.88338	6.15181	6.81299	6.67985	7.18448	7.14684	6.68695	7.13935	8.10495	7.90734	8.27983	7.04169	7.43406	[K].SPAEAKSPIEVKSPEK.[A]	1xPhospho [S7]; 3xTMTpro [K6; K12; K16]; 1xTMTpro [N-Term]	P19246 [757-772]	P19246 1xPhospho [S763]	1	_SPAEAKsPIEVKSP	Nefh
P19246	SPAEAksPIEVk.P19246	4	SPAEAksPIEVk	5.24e-05	6.35299	6.2192	6.22606	5.82533	6.1436	6.92634	7.60646	8.16473	7.54283	7.36565	7.19545	7.18718	8.96546	8.1353	9.13321	9.03411	8.46356	8.3291	9.22652	8.95582	[K].SPAEAKSPIEVK.[S]	1xPhospho [S7]; 2xTMTpro [K6; K12]; 1xTMTpro [N-Term]	P19246 [757-768]	P19246 1xPhospho [S763]	1	_SPAEAKsPIEVK__	Nefh
P19246	sPGEAk.P19246	3	sPGEAk	1.63e-05	7.59037	7.55264	7.68063	8.16277	7.95641	7.6139	7.61827	8.36222	7.93226	7.89232	8.25893	9.35683	10.526	8.98706	10.0713	11.3414	10.564	9.93357	9.85011	10.7521	[K].SPGEAK.[S]	1xPhospho [S1]; 1xTMTpro [K6]; 1xTMTpro [N-Term]	P19246 [523-528]; [529-534]; [541-546]; [547-552]; [553-558]; [589-594]; [643-648]; [679-684]; [715-720]; [739-744]; [745-750]	P19246 1xPhospho [S523]; 1xPhospho [S529]; 1xPhospho [S541]; 1xPhospho [S547]; 1xPhospho [S553]; 1xPhospho [S589]; 1xPhospho [S643]; 1xPhospho [S679]; 1xPhospho [S715]; 1xPhospho [S739]; 1xPhospho [S745]	1	_______sPGEAK__	Nefh
P19246	SPATVksPGEAksPSEAk.P19246	4	SPATVksPGEAksPSEAk	0.00228628	5.89699	6.16505	6.08975	6.2806	6.45314	6.38995	6.96232	7.83547	6.64697	6.61422	6.58919	6.77229	7.70833	7.17948	7.84741	7.79373	7.31188	7.18181	7.92224	7.53495	[K].SPATVKSPGEAKSPSEAK.[S]	2xPhospho [S7; S13]; 3xTMTpro [K6; K12; K18]; 1xTMTpro [N-Term]	P19246 [583-600]; [637-654]	P19246 2xPhospho [S589; S595]; 2xPhospho [S643; S649]	2	_SPATVKsPGEAKsP	Nefh
P19246	SPAEAksPAEVk.P19246	4	SPAEAksPAEVk	0.000933585	5.38646	5.41599	5.69041	5.84601	6.13227	6.04061	6.91625	7.67521	6.83418	6.70466	6.21095	6.38073	7.37838	6.56767	7.56765	7.76251	7.28748	7.02586	7.47173	7.2471	[K].SPAEAKSPAEVK.[S]	1xPhospho [S7]; 2xTMTpro [K6; K12]; 1xTMTpro [N-Term]	P19246 [667-678]; [691-702]; [703-714]	P19246 1xPhospho [S673]; 1xPhospho [S697]; 1xPhospho [S709]	1	_SPAEAKsPAEVK__	Nefh
P19246	SPGEAksPSEAkSPAEAk.P19246	3	SPGEAksPSEAkSPAEAk	6.54e-06	6.43874	6.19668	6.93103	6.59396	6.83529	7.77065	7.42353	7.20853	7.49796	8.38935	8.08175	8.18524	8.46428	7.84338	8.40857	8.55097	8.31912	8.29603	7.9826	8.37386	[K].SPGEAKSPSEAKSPAEAK.[S]	1xPhospho [S7]; 3xTMTpro [K6; K12; K18]; 1xTMTpro [N-Term]	P19246 [589-606]; [643-660]	P19246 1xPhospho [S595]; 1xPhospho [S649]	1	_SPGEAKsPSEAKSP	Nefh
P19246	SPAEAksPAEAksPIEVkSPEk.P19246	3	SPAEAksPAEAksPIEVkSPEk	2.71e-06	3.99731	4.43164	4.68809	4.27629	5.10638	5.18712	4.86657	4.96802	5.06088	5.70632	5.512	5.82264	6.13312	5.65177	6.15019	6.57344	6.39864	6.69531	6.29353	6.28233	[K].SPAEAKSPAEAKSPIEVKSPEK.[A]	2xPhospho [S7; S13]; 4xTMTpro [K6; K12; K18; K22]; 1xTMTpro [N-Term]	P19246 [751-772]	P19246 2xPhospho [S757; S763]	2	_SPAEAKsPAEAKsP	Nefh
P19246	sPAEAk.P19246	3	sPAEAk	8.18e-07	6.58708	6.77462	7.3948	6.2627	6.55547	7.45367	7.39468	8.41419	8.24536	8.09142	8.56918	9.88288	11.0504	9.49805	10.4576	11.8394	11.0036	10.5477	10.4078	11.6743	[K].SPAEAK.[S]	1xPhospho [S1]; 1xTMTpro [K6]; 1xTMTpro [N-Term]	P19246 [535-540]; [571-576]; [601-606]; [607-612]; [613-618]; [619-624]; [625-630]; [631-636]; [655-660]; [661-666]; [667-672]; [691-696]; [703-708]; [727-732]; [751-756]; [757-762]; [783-788]	P19246 1xPhospho [S535]; 1xPhospho [S571]; 1xPhospho [S601]; 1xPhospho [S607]; 1xPhospho [S613]; 1xPhospho [S619]; 1xPhospho [S625]; 1xPhospho [S631]; 1xPhospho [S655]; 1xPhospho [S661]; 1xPhospho [S667]; 1xPhospho [S691]; 1xPhospho [S703]; 1xPhospho [S727]; 1xPhospho [S751]; 1xPhospho [S757]; 1xPhospho [S783]	1	_______sPAEAK__	Nefh
P19246	SPAEAksPATVk.P19246	4	SPAEAksPATVk	0.000892296	5.92335	5.99492	5.80561	5.71386	6.0296	6.48762	6.96906	7.46324	6.82219	6.70157	6.30679	6.52216	7.4651	6.76177	7.60205	7.3761	7.04307	6.76986	7.63197	7.19024	[K].SPAEAKSPATVK.[S]	1xPhospho [S7]; 2xTMTpro [K6; K12]; 1xTMTpro [N-Term]	P19246 [631-642]	P19246 1xPhospho [S637]	1	_SPAEAKsPATVK__	Nefh
P19246	TSVSSVSAsPSRFR.P19246	NA	TSVSSVSAsPSRFR	0.38573	5.59457	5.32323	5.96805	6.02179	5.62247	5.78018	5.03566	5.01157	5.48547	5.94606	5.61313	6.12052	5.71074	5.39291	5.81336	5.61975	5.60649	5.97377	5.96008	5.73069	[R].TSVSSVSASPSRFR.[G]	1xPhospho [S9]; 1xTMTpro [N-Term]	P19246 [53-66]	P19246 1xPhospho [S61]	1	SVSSVSAsPSRFR__	Nefh
P19246	SPSEAksPAEAk.P19246	4	SPSEAksPAEAk	0.00368888	5.55192	5.43947	6.4637	6.54302	6.3344	6.80217	7.74567	8.29376	6.94503	6.91575	6.67145	6.55872	7.35345	7.07236	7.65048	8.14243	7.63123	7.08471	7.48685	7.30459	[K].SPSEAKSPAEAK.[S]	1xPhospho [S7]; 2xTMTpro [K6; K12]; 1xTMTpro [N-Term]	P19246 [595-606]; [649-660]	P19246 1xPhospho [S601]; 1xPhospho [S655]	1	_SPSEAKsPAEAK__	Nefh
P19246	SPGEAksPAAVk.P19246	4	SPGEAksPAAVk	0.00203317	5.82057	6.01776	5.92732	5.6158	5.46277	6.17533	6.84535	7.47099	6.74879	6.55335	6.21314	6.32456	7.66828	6.86271	8.01085	7.51478	7.21292	6.89525	7.82319	7.46613	[K].SPGEAKSPAAVK.[S]	1xPhospho [S7]; 2xTMTpro [K6; K12]; 1xTMTpro [N-Term]	P19246 [715-726]	P19246 1xPhospho [S721]	1	_SPGEAKsPAAVK__	Nefh
P19246	SPGEAksPGEAk.P19246	4	SPGEAksPGEAk	0.00018367	7.51412	7.46238	7.5492	7.34637	7.53738	8.50467	9.37063	10.0233	8.93409	8.8298	8.51411	8.24064	9.79094	9.13429	10.0015	10.0256	9.45202	9.05213	9.8125	9.50135	[K].SPGEAKSPGEAK.[S]	1xPhospho [S7]; 2xTMTpro [K6; K12]; 1xTMTpro [N-Term]	P19246 [523-534]; [541-552]; [739-750]	P19246 1xPhospho [S529]; 1xPhospho [S547]; 1xPhospho [S745]	1	_SPGEAKsPGEAK__	Nefh
P19246	VkEEAksPGEAk.P19246	4	VkEEAksPGEAk	5.98e-05	6.40982	6.53852	6.81761	6.56821	7.14067	7.21234	7.92915	8.6722	7.79644	7.55985	7.63684	8.10326	8.85553	8.08044	9.17739	9.10629	8.7076	8.55633	8.96223	8.57099	[R].VKEEAKSPGEAK.[S]	1xPhospho [S7]; 3xTMTpro [K2; K6; K12]; 1xTMTpro [N-Term]	P19246 [517-528]	P19246 1xPhospho [S523]	1	_VKEEAKsPGEAK__	Nefh
P19246	SPAEAksPAEAk.P19246	4	SPAEAksPAEAk	8.66e-05	5.90553	5.7685	5.83017	5.95344	6.39275	6.89122	7.92839	8.35122	7.30383	7.41419	7.18122	6.97081	8.40703	7.92034	8.43566	8.4611	7.91788	7.59216	8.24452	8.00176	[K].SPAEAKSPAEAK.[S]	1xPhospho [S7]; 2xTMTpro [K6; K12]; 1xTMTpro [N-Term]	P19246 [601-612]; [613-624]; [625-636]; [655-666]; [751-762]	P19246 1xPhospho [S607]; 1xPhospho [S619]; 1xPhospho [S631]; 1xPhospho [S661]; 1xPhospho [S757]	1	_SPAEAKsPAEAK__	Nefh
P19246	AktPVk.P19246	4	AktPVk	0.000113192	5.90291	6.14346	6.04662	5.62019	5.86281	6.4534	7.19098	8.2614	7.39678	6.99569	6.79407	8.04874	9.26954	8.09422	9.24338	9.59002	8.64388	7.97948	8.83714	8.872	[K].AKTPVK.[E]	1xPhospho [T3]; 2xTMTpro [K2; K6]; 1xTMTpro [N-Term]	P19246 [773-778]	P19246 1xPhospho [T775]	1	_____AKtPVK____	Nefh
P19246	SPAAVksPGEAk.P19246	4	SPAAVksPGEAk	1.71e-05	6.61751	6.47848	7.10395	7.07698	7.09286	7.50474	8.2537	9.04454	7.86543	7.86052	8.01666	8.20438	9.15794	8.61369	9.46331	9.68344	9.22668	9.05928	9.45379	9.24253	[K].SPAAVKSPGEAK.[S]	1xPhospho [S7]; 2xTMTpro [K6; K12]; 1xTMTpro [N-Term]	P19246 [733-744]	P19246 1xPhospho [S739]	1	_SPAAVKsPGEAK__	Nefh
P19246	SPAAVksPAEAk.P19246	3	SPAAVksPAEAk	0.00100611	6.10113	6.34427	6.95393	7.05631	7.07431	6.55343	7.28284	8.16866	7.05397	7.12126	7.15961	7.48814	7.9188	7.41427	8.15205	8.83286	8.4235	8.07812	7.99475	8.16745	[K].SPAAVKSPAEAK.[S]	1xPhospho [S7]; 2xTMTpro [K6; K12]; 1xTMTpro [N-Term]	P19246 [721-732]	P19246 1xPhospho [S727]	1	_SPAAVKsPAEAK__	Nefh
P20357	APHWTSASLTEAAAHPHsPEmk.P20357	5	APHWTSASLTEAAAHPHsPEmk	0.00192807	5.23371	4.31273	5.00225	4.75196	5.02746	4.5793	4.62746	4.62036	5.16808	4.64374	3.97456	4.33181	4.61282	4.32483	4.11192	3.97228	4.15967	3.91253	3.99493	4.42689	[K].APHWTSASLTEAAAHPHSPEMK.[D]	1xPhospho [S18]; 1xOxidation [M21]; 1xTMTpro [K22]; 1xTMTpro [N-Term]	P20357 [11-32]	P20357 1xPhospho [S28]	1	EAAAHPHsPEMK___	Map2
P20357	kSEVQAHsPSR.P20357	5	kSEVQAHsPSR	0.000953098	6.23541	6.40512	5.87282	6.96852	6.4801	4.3543	4.01797	5.4073	4.74374	5.17218	5.3321	4.72515	6.34147	5.8256	4.60964	4.12634	4.60676	5.11553	4.66345	4.84158	[K].KSEVQAHSPSR.[K]	1xPhospho [S8]; 1xTMTpro [K1]; 1xTMTpro [N-Term]	P20357 [1478-1488]	P20357 1xPhospho [S1485]	1	KSEVQAHsPSR____	Map2
P20357	SSVAsPRR.P20357	1	SSVAsPRR	2.05e-05	6.66661	6.48364	6.86435	7.15429	7.09735	6.09108	5.78596	6.23364	6.03971	6.30102	6.00434	5.70453	6.36495	6.65484	6.21786	5.51625	5.42111	5.63301	5.24674	5.45794	[R].SSVASPRR.[L]	1xPhospho [S5]; 1xTMTpro [N-Term]	P20357 [1787-1794]	P20357 1xPhospho [S1791]	1	___SSVAsPRR____	Map2
P20357	TPGtPGTPSYPR.P20357	6	TPGtPGTPSYPR	0.000255831	4.27707	4.34496	4.61914	5.07958	4.69011	3.79887	3.61076	3.69898	3.84165	4.00836	3.93663	3.85948	4.1661	4.10026	4.19141	3.8967	4.01413	4.18033	4.12781	4.0812	[R].TPGTPGTPSYPR.[T]	1xPhospho [T4]; 1xTMTpro [N-Term]	P20357 [1617-1628]	P20357 1xPhospho [T1620]	1	____TPGtPGTPSYP	Map2
P20357	EAsPPTSADk.P20357	6	EAsPPTSADk	0.128625	6.63326	6.72657	7.15626	7.30982	6.58421	6.39706	6.28528	6.67619	6.75176	6.60207	6.41544	6.90683	7.96462	7.00224	6.83028	6.83098	7.14291	7.02517	7.16513	7.34905	[K].EASPPTSADK.[S]	1xPhospho [S3]; 1xTMTpro [K10]; 1xTMTpro [N-Term]	P20357 [936-945]	P20357 1xPhospho [S938]	1	_____EAsPPTSADK	Map2
P20357	TTRsEPIRR.P20357	6	TTRsEPIRR	0.0036926	5.97221	5.80401	6.00054	6.56053	5.93425	5.34569	5.1653	4.60888	5.2635	5.30596	5.15225	5.22721	5.49387	5.51553	5.08671	5.15406	5.33961	5.40882	5.79394	6.25955	[R].TTRSEPIRR.[A]	1xPhospho [S4]; 1xTMTpro [N-Term]	P20357 [1580-1588]	P20357 1xPhospho [S1583]	1	____TTRsEPIRR__	Map2
P20357	VGsLDNAHHVPGGGNVk.P20357	5	VGsLDNAHHVPGGGNVk	0.00756619	6.1546	6.27352	6.71669	6.52793	6.72103	6.37446	6.06476	5.73744	6.73567	6.66285	5.98036	5.58837	6.67148	6.292	5.67951	5.00514	5.29353	5.58911	6.02959	5.48639	[K].VGSLDNAHHVPGGGNVK.[I]	1xPhospho [S3]; 1xTMTpro [K17]; 1xTMTpro [N-Term]	P20357 [1741-1757]	P20357 1xPhospho [S1743]	1	_____VGsLDNAHHV	Map2
P20357	SSVAsPR.P20357	2	SSVAsPR	2.64e-06	7.22466	6.92846	7.08643	7.63884	7.21279	6.76137	6.88002	6.92115	7.3812	7.24746	6.38827	5.86162	6.68285	6.913	6.23698	5.24401	5.48642	5.76354	5.38409	5.54558	[R].SSVASPR.[R]	1xPhospho [S5]; 1xTMTpro [N-Term]	P20357 [1787-1793]	P20357 1xPhospho [S1791]	1	___SSVAsPR_____	Map2
P20357	VAIIRtPPk.P20357	1	VAIIRtPPk	0.000536279	5.43677	5.49823	6.20874	5.83782	5.61489	4.92797	4.85977	4.89936	5.35032	4.60331	4.73976	4.82694	5.38417	4.9982	4.91283	4.96604	4.77305	4.92255	4.98649	4.98365	[K].VAIIRTPPK.[S]	1xPhospho [T6]; 1xTMTpro [K9]; 1xTMTpro [N-Term]	P20357 [1645-1653]	P20357 1xPhospho [T1650]	1	__VAIIRtPPK____	Map2
P20357	IStPERk.P20357	5	IStPERk	0.000463418	7.88357	8.04943	8.25246	8.80947	8.53117	6.5664	6.35721	7.59104	7.06653	7.4069	7.44723	6.89194	7.54281	7.93463	7.31699	6.57838	6.89504	7.20028	7.00944	7.00835	[R].ISTPERK.[V]	1xPhospho [T3]; 1xTMTpro [K7]; 1xTMTpro [N-Term]	P20357 [1443-1449]	P20357 1xPhospho [T1445]	1	_____IStPERK___	Map2
P20357	DGsPDAPATPEkEEVAFsEYk.P20357	6	DGsPDAPATPEkEEVAFsEYk	0.0108886	4.5102	4.47712	5.23809	4.90265	4.64317	4.26106	3.96498	4.16495	4.31333	4.36476	4.63614	4.4179	4.69223	4.46737	4.63115	4.47897	4.71706	4.57858	4.8296	5.22815	[K].DGSPDAPATPEKEEVAFSEYK.[T]	2xPhospho [S3; S18]; 2xTMTpro [K12; K21]; 1xTMTpro [N-Term]	P20357 [1350-1370]	P20357 2xPhospho [S1352; S1367]	2	_____DGsPDAPATP	Map2
P20357	GVsGDREENSFSLNSSISSAR.P20357	1	GVsGDREENSFSLNSSISSAR	0.000158663	7.43041	7.29901	7.55731	7.70939	7.55103	6.75403	6.52964	6.3156	6.94879	7.00683	6.56412	6.40862	6.79193	6.81222	6.68814	6.13891	6.37589	6.36405	6.85592	6.89293	[R].GVSGDREENSFSLNSSISSAR.[R]	1xPhospho [S3]; 1xTMTpro [N-Term]	P20357 [1558-1578]	P20357 1xPhospho [S1560]	1	_____GVsGDREENS	Map2
P20357	RGVsGDREENSFSLNSSISSAR.P20357	5	RGVsGDREENSFSLNSSISSAR	0.000101376	7.05579	6.73626	6.5978	7.17877	7.26576	6.4039	6.38178	6.14009	6.2904	6.51327	5.95034	5.77092	6.26557	6.14917	5.90326	5.18992	5.48388	5.49527	5.96154	6.30841	[R].RGVSGDREENSFSLNSSISSAR.[R]	1xPhospho [S4]; 1xTMTpro [N-Term]	P20357 [1557-1578]	P20357 1xPhospho [S1560]	1	____RGVsGDREENS	Map2
P20444	VIsPSEDRkQPSNNLDR.P20444	7	VIsPSEDRkQPSNNLDR	0.0418055	7.40895	7.07699	7.53547	7.41388	7.28705	7.53194	7.85569	7.65034	7.60072	7.88788	7.56924	7.09088	7.88215	7.93336	7.93903	8.05229	7.66885	7.54889	7.93698	8.10492	[K].VISPSEDRKQPSNNLDR.[V]	1xPhospho [S3]; 1xTMTpro [K9]; 1xTMTpro [N-Term]	P20444 [317-333]	P20444 1xPhospho [S319]	1	_____VIsPSEDRKQ	Prkca
P20444	VIsPSEDR.P20444	4	VIsPSEDR	0.14624	8.06932	7.88886	7.99564	7.57171	7.30823	7.67959	8.48203	8.9931	8.4875	7.83562	7.69525	7.56762	8.67027	8.58318	8.83922	8.72297	8.23887	7.93909	9.10152	8.74361	[K].VISPSEDR.[K]	1xPhospho [S3]; 1xTMTpro [N-Term]	P20444 [317-324]	P20444 1xPhospho [S319]	1	_____VIsPSEDR__	Prkca
P21619	RLETEDTSGsPSR.P21619	6	RLETEDTSGsPSR	0.000137477	5.55529	5.22508	5.64686	6.02311	5.74284	4.68813	4.36835	4.15753	4.45721	4.75861	4.76219	4.66936	5.19143	5.03267	5.24043	5.03449	4.68061	4.67446	4.76687	5.26175	[R].RLETEDTSGSPSR.[A]	1xPhospho [S10]; 1xTMTpro [N-Term]	P21619 [418-430]	P21619 1xPhospho [S427]	1	ETEDTSGsPSR____	Lmnb2
P21619	LETEDTSGsPSR.P21619	6	LETEDTSGsPSR	0.000877279	4.0925	3.55805	4.73598	4.93629	4.05978	2.96424	3.0049	2.55576	2.94429	2.78205	3.0757	3.45417	3.64891	2.87627	3.37669	3.75216	3.51726	2.65631	3.63956	3.57995	[R].LETEDTSGSPSR.[A]	1xPhospho [S9]; 1xTMTpro [N-Term]	P21619 [419-430]	P21619 1xPhospho [S427]	1	ETEDTSGsPSR____	Lmnb2
P24529	AVsEQDTk.P24529	4	AVsEQDTk	0.00036134	6.43435	6.17695	6.25303	6.41465	6.17129	6.33572	6.75196	6.8608	6.78574	6.41753	6.7783	6.6736	7.583	7.19707	7.34303	8.06685	7.53895	6.83362	8.0085	7.46857	[R].AVSEQDTK.[Q]	1xPhospho [S3]; 1xTMTpro [K8]; 1xTMTpro [N-Term]	P24529 [17-24]	P24529 1xPhospho [S19]	1	_____AVsEQDTK__	Th
P24529	MPTPSASsPQPk.P24529	3	MPTPSASsPQPk	0.00489861	6.39386	6.25326	6.59157	6.7277	6.78112	6.1858	6.26591	6.48037	6.37855	6.7253	6.6268	6.91206	6.7141	6.60339	7.11576	6.93215	6.86551	6.87867	7.22859	6.88121	[-].MPTPSASSPQPK.[G]	1xPhospho [S8]; 1xMet-loss [N-Term]; 1xTMTpro [K12]; 1xTMTpro [N-Term]	P24529 [1-12]	P24529 1xPhospho [S8]; 1xMet-loss [N-Term]	1	MPTPSASsPQPK___	Th
P24529	QAEAVTsPR.P24529	3	QAEAVTsPR	1.66e-06	5.79826	5.62529	6.07224	5.86442	5.93264	6.34	6.32509	6.80393	6.53386	6.58926	7.05545	6.85644	7.63998	7.12699	7.88713	7.76523	7.34023	7.34964	7.88521	7.67615	[K].QAEAVTSPR.[F]	1xPhospho [S7]; 1xTMTpro [N-Term]	P24529 [25-33]	P24529 1xPhospho [S31]	1	_QAEAVTsPR_____	Th
P24529	RAVsEQDTk.P24529	4	RAVsEQDTk	0.00355956	6.1499	6.09293	6.05181	6.15426	6.18247	6.34889	6.70999	6.71071	6.51596	6.34455	6.67706	6.25561	7.43841	7.1419	7.14533	7.82687	7.01598	6.46491	7.98703	7.17695	[R].RAVSEQDTK.[Q]	1xPhospho [S4]; 1xTMTpro [K9]; 1xTMTpro [N-Term]	P24529 [16-24]	P24529 1xPhospho [S19]	1	____RAVsEQDTK__	Th
P26645	GEATAERPGEAAVASsPSk.P26645	1	GEATAERPGEAAVASsPSk	5.3e-06	9.30769	9.45905	9.82349	9.64902	9.34656	7.59049	7.52427	7.9447	8.34914	8.2526	7.71957	8.40358	8.39155	8.04327	7.76725	8.42475	8.0928	8.05108	7.82288	8.29599	[K].GEATAERPGEAAVASSPSK.[A]	1xPhospho [S16]; 1xTMTpro [K19]; 1xTMTpro [N-Term]	P26645 [12-30]	P26645 1xPhospho [S27]	1	GEAAVASsPSK____	Marcks
P26645	TAAkGEATAERPGEAAVASsPSk.P26645	5	TAAkGEATAERPGEAAVASsPSk	1.71e-06	7.20442	7.23387	7.19375	7.15072	7.17626	6.367	6.67972	6.87581	6.86887	6.69821	6.10276	5.85494	6.37031	6.49011	6.53853	5.91525	5.91062	5.83994	6.18668	5.99042	[K].TAAKGEATAERPGEAAVASSPSK.[A]	1xPhospho [S20]; 2xTMTpro [K4; K23]; 1xTMTpro [N-Term]	P26645 [8-30]	P26645 1xPhospho [S27]	1	GEAAVASsPSK____	Marcks
P26645	LSGFsFk.P26645	5	LSGFsFk	3.21e-08	8.83425	8.43702	8.29882	8.95552	8.64667	7.30328	7.36543	7.04849	7.82884	7.55124	6.72051	7.32533	7.45354	7.2355	7.07067	6.19912	6.20164	6.29106	6.06725	6.08271	[K].LSGFSFK.[K]	1xPhospho [S5]; 1xTMTpro [K7]; 1xTMTpro [N-Term]	P26645 [159-165]	P26645 1xPhospho [S163]	1	___LSGFsFK_____	Marcks
P26645	LSGFsFkk.P26645	5	LSGFsFkk	2.37e-08	9.86486	9.8531	9.67155	10.212	10.0866	8.86776	8.82182	8.80801	9.27912	9.23863	8.22272	8.90787	8.93009	8.87939	8.86945	7.67078	7.69592	7.66497	7.42867	7.36132	[K].LSGFSFKK.[S]	1xPhospho [S5]; 2xTMTpro [K7; K8]; 1xTMTpro [N-Term]	P26645 [159-166]	P26645 1xPhospho [S163]	1	___LSGFsFKK____	Marcks
P27546	ATsPSTLVSTGPSSR.P27546	5	ATsPSTLVSTGPSSR	5.47e-07	7.74866	7.65058	8.24046	8.27451	8.05302	7.31307	7.41286	7.10995	8.09567	7.93072	6.5688	6.29605	6.65347	6.68819	6.4205	5.94509	6.03359	6.05814	5.29604	5.34662	[K].ATSPSTLVSTGPSSR.[S]	1xPhospho [S3]; 1xTMTpro [N-Term]	P27546 [783-797]	P27546 1xPhospho [S785]	1	_____ATsPSTLVST	Map4
P27546	DmsPSAETEAPLAk.P27546	5	DmsPSAETEAPLAk	9.2e-07	7.46539	7.34469	7.73163	7.58234	7.32171	6.81693	7.07343	7.27942	7.75949	7.32253	6.28381	6.5232	6.76363	6.47195	6.75398	5.73234	5.99427	6.1312	6.08774	5.83973	[K].DMSPSAETEAPLAK.[N]	1xPhospho [S3]; 1xOxidation [M2]; 1xTMTpro [K14]; 1xTMTpro [N-Term]	P27546 [515-528]	P27546 1xPhospho [S517]	1	_____DMsPSAETEA	Map4
P27546	AAVGVTGNDITTPPNkEPPPsPEk.P27546	5	AAVGVTGNDITTPPNkEPPPsPEk	3.22e-05	6.21332	6.26184	6.4032	6.31146	6.4491	6.19723	5.77884	5.83319	6.19637	6.14859	5.80704	5.74678	5.86728	5.65249	5.86141	5.1294	5.48153	5.50218	5.58267	5.76175	[K].AAVGVTGNDITTPPNKEPPPSPEK.[K]	1xPhospho [S21]; 2xTMTpro [K16; K24]; 1xTMTpro [N-Term]	P27546 [647-670]	P27546 1xPhospho [S667]	1	PNKEPPPsPEK____	Map4
P27546	DmsPLPESEVTLGk.P27546	5	DmsPLPESEVTLGk	1.74e-05	6.64016	6.38646	6.55387	6.2882	6.35293	5.80276	6.7482	6.88298	6.90028	6.13262	5.0868	5.08833	5.51572	5.78787	5.4854	4.72907	4.99384	4.99028	5.40467	5.20452	[K].DMSPLPESEVTLGK.[D]	1xPhospho [S3]; 1xOxidation [M2]; 1xTMTpro [K14]; 1xTMTpro [N-Term]	P27546 [473-486]	P27546 1xPhospho [S475]	1	_____DMsPLPESEV	Map4
P27546	SAsADLSR.P27546	2	SAsADLSR	1.18e-06	6.16869	6.24329	6.47944	6.32249	6.60359	6.92474	6.63886	6.58086	7.02564	6.84772	6.36987	6.51147	6.98875	7.02826	6.02512	5.00498	5.0572	4.92584	5.32112	5.21548	[K].SASADLSR.[S]	1xPhospho [S3]; 1xTMTpro [N-Term]	P27546 [826-833]	P27546 1xPhospho [S828]	1	_____SAsADLSR__	Map4
P27546	TtPTVSk.P27546	5	TtPTVSk	1.2e-05	7.47662	6.66212	6.83423	7.24362	7.18656	6.68181	7.3252	7.19534	7.40854	6.85735	6.08467	5.61768	6.19997	6.44703	6.32723	5.73592	5.73235	5.83758	5.86517	5.94541	[K].TTPTVSK.[A]	1xPhospho [T2]; 1xTMTpro [K7]; 1xTMTpro [N-Term]	P27546 [776-782]	P27546 1xPhospho [T777]	1	______TtPTVSK__	Map4
P27546	VGsLDNVGHLPAGGAVk.P27546	2	VGsLDNVGHLPAGGAVk	8.55e-05	8.18238	8.04662	8.0974	7.79166	7.95942	8.71882	8.32641	7.75914	8.66424	8.69341	7.62644	7.67177	8.67195	8.06136	7.71482	6.71081	7.10018	6.89542	7.2031	6.94374	[K].VGSLDNVGHLPAGGAVK.[T]	1xPhospho [S3]; 1xTMTpro [K17]; 1xTMTpro [N-Term]	P27546 [1044-1060]	P27546 1xPhospho [S1046]	1	_____VGsLDNVGHL	Map4
P27546	LATTVsAPDLk.P27546	5	LATTVsAPDLk	2.05e-06	8.66104	8.34409	8.9896	8.86249	8.8137	8.46574	8.26644	7.82545	8.8586	8.65985	7.95473	7.51059	7.81404	8.04274	7.5529	6.89093	6.91996	6.92618	6.31824	5.96886	[R].LATTVSAPDLK.[S]	1xPhospho [S6]; 1xTMTpro [K11]; 1xTMTpro [N-Term]	P27546 [896-906]	P27546 1xPhospho [S901]	1	__LATTVsAPDLK__	Map4
P27546	AAEQmSTLPIDAPsPLENLEQk.P27546	2	AAEQmSTLPIDAPsPLENLEQk	0.000424582	5.06194	4.27847	4.97379	4.67643	4.69381	4.40219	5.11137	5.78574	5.12241	4.60907	3.70246	4.12025	4.22617	4.3372	4.30412	3.47466	3.24356	3.15128	4.07577	3.926	[K].AAEQMSTLPIDAPSPLENLEQK.[E]	1xPhospho [S14]; 1xOxidation [M5]; 1xTMTpro [K22]; 1xTMTpro [N-Term]	P27546 [604-625]	P27546 1xPhospho [S617]	1	TLPIDAPsPLENLEQ	Map4
P27546	EPPPsPEk.P27546	1	EPPPsPEk	0.000673558	6.50922	6.25735	7.42335	6.5337	6.16373	5.75342	5.50823	5.77506	5.94822	6.00211	5.22386	5.9183	5.9209	5.68679	6.0458	5.45553	5.34529	5.43897	5.4595	5.4546	[K].EPPPSPEK.[KV]	1xPhospho [S5]; 1xTMTpro [K8]; 1xTMTpro [N-Term]	P27546 [663-670]	P27546 1xPhospho [S667]	1	___EPPPsPEK____	Map4
P27671	RAPsPk.P27671	3	RAPsPk	7.2e-08	6.61229	6.8669	7.26024	6.97817	7.36591	8.20587	7.9674	8.63406	8.43971	8.63059	8.80964	8.93815	9.27486	9.13726	9.20589	8.81534	8.84055	8.69553	8.92027	9.14364	[K].RAPSPK.[R]	1xPhospho [S4]; 1xTMTpro [K6]; 1xTMTpro [N-Term]	P27671 [75-80]	P27671 1xPhospho [S78]	1	____RAPsPK_____	Rasgrf1
P28028	SAsEPSLNR.P28028	3	SAsEPSLNR	8.72e-06	7.22499	7.16608	7.59287	7.69219	7.90062	7.33458	7.30359	7.20374	7.73147	7.72747	8.01917	8.18466	8.10876	8.13774	8.46803	8.54935	8.49551	8.4478	8.64523	8.6376	[R].SASEPSLNR.[A]	1xPhospho [S3]; 1xTMTpro [N-Term]	P28028 [764-772]	P28028 1xPhospho [S766]	1	_____SAsEPSLNR_	NA
P28028	NNPksPQkPIVR.P28028	3	NNPksPQkPIVR	0.00134838	6.84868	6.4467	6.90636	6.95676	6.94009	6.80209	6.90287	7.57266	6.96511	7.10835	7.28583	7.13037	7.3293	7.36036	7.30358	7.7287	7.4095	7.25156	7.82887	7.64728	[R].NNPKSPQKPIVR.[V]	1xPhospho [S5]; 2xTMTpro [K4; K8]; 1xTMTpro [N-Term]	P28028 [131-142]	P28028 1xPhospho [S135]	1	___NNPKsPQKPIVR	NA
P28652	NSSAITsPk.P28652	7	NSSAITsPk	0.000494744	7.48891	7.30086	7.44001	7.24784	6.6455	8.10365	9.02577	9.8253	9.27066	8.74753	8.46409	8.21711	9.41443	9.59917	9.80883	8.72892	8.61655	7.96062	8.93756	8.61664	[K].NSSAITSPK.[G]	1xPhospho [S7]; 1xTMTpro [K9]; 1xTMTpro [N-Term]	P28652 [361-369]	P28652 1xPhospho [S367]	1	_NSSAITsPK_____	Camk2b
P28667	LSGLsFk.P28667	5	LSGLsFk	9.52e-09	8.51386	8.08565	8.09429	8.45734	8.26002	6.94013	6.77084	6.67846	7.39868	7.06473	5.74764	6.69162	6.75558	6.41375	6.28331	5.27654	5.18362	5.48264	5.33161	5.21793	[K].LSGLSFK.[R]	1xPhospho [S5]; 1xTMTpro [K7]; 1xTMTpro [N-Term]	P28667 [100-106]	P28667 1xPhospho [S104]	1	___LSGLsFK_____	Marcksl1
P28667	LSGLsFkR.P28667	5	LSGLsFkR	3.25e-07	9.81415	9.9571	9.19303	9.48908	9.64733	8.78802	8.53078	7.80384	8.58321	8.60915	7.482	8.16091	7.86335	7.68533	7.65225	5.69514	6.0041	6.82967	7.02561	6.80405	[K].LSGLSFKR.[N]	1xPhospho [S5]; 1xTMTpro [K7]; 1xTMTpro [N-Term]	P28667 [100-107]	P28667 1xPhospho [S104]	1	___LSGLsFKR____	Marcksl1
P28667	SNGDLtPk.P28667	1	SNGDLtPk	2.2e-05	6.78468	6.60966	6.09449	6.34096	6.16973	5.30956	5.05131	5.30511	5.56895	5.45944	4.83775	5.2371	5.24301	5.43439	5.29378	4.84665	4.8585	5.31705	5.51665	5.46755	[R].SNGDLTPK.[G]	1xPhospho [T6]; 1xTMTpro [K8]; 1xTMTpro [N-Term]	P28667 [36-43]	P28667 1xPhospho [T41]	1	__SNGDLtPK_____	Marcksl1
P28667	GEVAPkEtPk.P28667	5	GEVAPkEtPk	1.83e-05	9.6341	9.2453	9.37509	9.51269	8.8228	8.12228	9.01173	9.44501	9.52501	8.7651	7.95796	7.93808	8.67091	9.00181	8.82788	7.43147	7.22612	7.22016	7.10927	6.7828	[K].GEVAPKETPK.[K]	1xPhospho [T8]; 2xTMTpro [K6; K10]; 1xTMTpro [N-Term]	P28667 [78-87]	P28667 1xPhospho [T85]	1	GEVAPKEtPK_____	Marcksl1
P28667	GDVTAEEAAGAsPAk.P28667	1	GDVTAEEAAGAsPAk	2.04e-08	6.98523	6.95949	6.99575	7.51005	6.96808	5.83965	5.51766	5.63055	5.9577	6.00418	5.61065	5.64854	5.70667	5.52356	5.41419	5.20327	5.07653	5.45717	5.41761	5.30017	[R].GDVTAEEAAGASPAK.[A]	1xPhospho [S12]; 1xTMTpro [K15]; 1xTMTpro [N-Term]	P28667 [11-25]	P28667 1xPhospho [S22]	1	AEEAAGAsPAK____	Marcksl1
P28741	sAkPETVIDSLLQ.P28741	5	sAkPETVIDSLLQ	0.214138	2.83689	2.8095	3.33308	3.80051	3.29481	3.35018	2.86752	2.20634	3.59859	3.50684	2.93041	2.73117	3.17389	2.64644	2.27486	2.67913	2.7788	3.16939	2.3854	2.54903	[R].SAKPETVIDSLLQ.[-]	1xPhospho [S1]; 1xTMTpro [K3]; 1xTMTpro [N-Term]	P28741 [689-701]	P28741 1xPhospho [S689]	1	_______sAKPETVI	Kif3a
P30999	GSLAsLDSLR.P30999	2	GSLAsLDSLR	4.71e-05	6.90387	6.63416	6.95245	6.78111	6.828	7.26652	7.34145	7.44085	7.51752	7.57957	7.33505	6.74582	7.2937	7.30953	6.89058	6.61924	6.42058	6.61503	6.64875	6.76007	[R].GSLASLDSLR.[K]	1xPhospho [S5]; 1xTMTpro [N-Term]	P30999 [345-354]	P30999 1xPhospho [S349]	1	___GSLAsLDSLR__	Ctnnd1
P30999	HYEDGYPGGSDNYGsLSR.P30999	1	HYEDGYPGGSDNYGsLSR	0.00469282	6.28831	6.44921	7.09324	7.06021	7.19596	6.02217	5.75698	5.82417	6.41618	6.30767	6.12245	6.52964	5.89113	6.00592	6.10833	6.07578	6.22745	6.23996	5.87881	6.22848	[R].HYEDGYPGGSDNYGSLSR.[V]	1xPhospho [S15]; 1xTMTpro [N-Term]	P30999 [216-233]	P30999 1xPhospho [S230]	1	GGSDNYGsLSR____	Ctnnd1
P31324	RAsVcAEAYNPDEEEDDAESR.P31324	1	RAsVcAEAYNPDEEEDDAESR	0.000314609	6.08439	5.22376	6.37467	6.13584	7.06273	4.61819	4.3354	3.72618	4.72471	4.55908	5.2884	4.84564	4.21083	4.06552	4.30389	4.75962	4.66919	4.34776	4.73952	3.71858	[R].RASVCAEAYNPDEEEDDAESR.[I]	1xCarbamidomethyl [C5]; 1xPhospho [S3]; 1xTMTpro [N-Term]	P31324 [110-130]	P31324 1xPhospho [S112]	1	_____RAsVCAEAYN	Prkar2b
P31324	GVNFAEEPmRSDsENGEEEEAAEAGAFNAPVINR.P31324	5	GVNFAEEPmRSDsENGEEEEAAEAGAFNAPVINR	0.00449406	4.06445	3.37828	4.09816	4.40379	3.67279	4.14219	3.88844	3.64491	3.94051	3.61423	3.36899	3.04342	3.71883	3.84766	3.06022	3.06154	2.94266	2.84842	3.31612	3.35104	[K].GVNFAEEPMRSDSENGEEEEAAEAGAFNAPVINR.[F]	1xPhospho [S13]; 1xOxidation [M9]; 1xTMTpro [N-Term]	P31324 [73-106]	P31324 1xPhospho [S85]	1	EEPMRSDsENGEEEE	Prkar2b
P33173	DVLsPLRPSRR.P33173	2	DVLsPLRPSRR	0.018246	7.59868	7.4872	7.785	7.62324	7.42372	7.73265	8.01535	7.85884	7.54272	7.72636	7.4631	6.80347	7.35415	7.77734	7.51617	7.27942	7.1531	6.93978	7.42946	7.37779	[K].DVLSPLRPSRR.[H]	1xPhospho [S4]; 1xTMTpro [N-Term]	P33173 [1090-1100]	P33173 1xPhospho [S1093]	1	____DVLsPLRPSRR	Kif1a
P33173	VTGVYELSLcHVADAGsPGmQR.P33173	2	VTGVYELSLcHVADAGsPGmQR	0.0428484	6.02921	5.61234	6.03824	5.71952	6.13717	5.7368	5.8854	5.95108	6.11125	5.70548	5.28935	4.99776	5.58288	5.78392	5.53676	5.48451	4.77569	5.79163	5.66783	5.65102	[R].VTGVYELSLCHVADAGSPGMQR.[R]	1xCarbamidomethyl [C10]; 1xPhospho [S17]; 1xOxidation [M20]; 1xTMTpro [N-Term]	P33173 [1326-1347]	P33173 1xPhospho [S1342]	1	CHVADAGsPGMQR__	Kif1a
P33173	DVLsPLRPSR.P33173	7	DVLsPLRPSR	0.133397	6.72235	6.52357	6.81977	6.74264	6.08962	6.60025	7.40781	7.86977	7.55235	6.92474	6.32498	6.14877	7.24585	7.52787	7.24898	6.65076	6.52554	6.46458	7.15422	6.55756	[K].DVLSPLRPSR.[R]	1xPhospho [S4]; 1xTMTpro [N-Term]	P33173 [1090-1099]	P33173 1xPhospho [S1093]	1	____DVLsPLRPSR_	Kif1a
P33173	DPSmSPLGAAtLTPSSTcPSLIEGR.P33173	NA	DPSmSPLGAAtLTPSSTcPSLIEGR	0.290442	3.59097	3.55438	3.77892	3.99753	3.51385	3.35962	3.05955	3.14981	3.97738	3.63827	3.00189	2.69766	3.61571	3.44091	3.33248	3.07728	2.96029	3.66836	3.84545	3.86152	[R].DPSMSPLGAATLTPSSTCPSLIEGR.[Y]	1xCarbamidomethyl [C18]; 1xPhospho [T11]; 1xOxidation [M4]; 1xTMTpro [N-Term]	P33173 [1496-1520]	P33173 1xPhospho [T1506]	1	MSPLGAAtLTPSSTC	Kif1a
P33173	SGTsQEELR.P33173	7	SGTsQEELR	0.00414325	7.88962	7.9219	8.09534	7.77413	7.48933	8.05129	8.5598	8.72409	8.65435	8.48351	8.28756	7.83131	8.52323	8.70451	8.68278	8.43173	8.46859	8.35509	8.59639	8.64899	[R].SGTSQEELR.[I]	1xPhospho [S4]; 1xTMTpro [N-Term]	P33173 [934-942]	P33173 1xPhospho [S937]	1	____SGTsQEELR__	Kif1a
P34152	YmEDSTyYk.P34152	4	YmEDSTyYk	0.00620591	7.47666	7.3434	7.35486	7.47131	7.24392	7.32015	7.52224	7.77649	7.61567	7.44531	7.46111	7.17197	7.7906	8.01352	7.91772	7.98282	7.88153	7.72485	8.54635	8.36814	[R].YMEDSTYYK.[A]	1xPhospho [Y7]; 1xOxidation [M2]; 1xTMTpro [K9]; 1xTMTpro [N-Term]	P34152 [570-578]	P34152 1xPhospho [Y576]	1	_YMEDSTyYK_____	Ptk2
P34152	LQPQEIsPPPTANLDR.P34152	NA	LQPQEIsPPPTANLDR	0.461244	5.80068	5.44956	5.88269	6.25539	5.79457	5.72038	6.24824	6.11615	5.98265	5.80308	5.55552	5.42855	5.79969	5.82972	5.97287	5.81015	5.89008	5.31515	5.95985	5.91714	[K].LQPQEISPPPTANLDR.[S]	1xPhospho [S7]; 1xTMTpro [N-Term]	P34152 [904-919]	P34152 1xPhospho [S910]	1	_LQPQEIsPPPTANL	Ptk2
P35235	VyENVGLmQQQR.P35235	2	VyENVGLmQQQR	0.0409539	5.26873	5.24931	5.19922	5.08286	5.31735	5.06887	4.93756	4.75657	5.19286	4.849	4.63646	4.44864	5.26776	4.96872	4.95503	4.59386	4.82778	4.69528	4.94668	5.03497	[R].VYENVGLMQQQR.[S]	1xPhospho [Y2]; 1xOxidation [M8]; 1xTMTpro [N-Term]	P35235 [583-594]	P35235 1xPhospho [Y584]	1	______VyENVGLMQ	Ptpn11
P35283	RPAGGSLGAVsPALSGGQAR.P35283	1	RPAGGSLGAVsPALSGGQAR	7.3e-06	7.30344	7.26189	7.6933	7.75325	7.88046	6.76119	6.60711	6.92866	6.90499	6.75174	6.91276	6.81262	6.71657	6.98798	6.89799	6.56847	6.57826	6.74042	6.73569	6.72234	[R].RPAGGSLGAVSPALSGGQAR.[R]	1xPhospho [S11]; 1xTMTpro [N-Term]	P35283 [10-29]	P35283 1xPhospho [S20]	1	GGSLGAVsPALSGGQ	Rab12
P35564	AEEDEILNRsPR.P35564	NA	AEEDEILNRsPR	0.843803	7.38438	7.32277	7.72815	7.71864	7.14629	7.26493	7.52481	7.77571	7.49982	7.20065	7.10775	7.16158	8.02528	7.46294	8.02329	7.66078	7.35402	7.26921	7.96111	7.81412	[K].AEEDEILNRSPR.[N]	1xPhospho [S10]; 1xTMTpro [N-Term]	P35564 [573-584]	P35564 1xPhospho [S582]	1	EDEILNRsPR_____	Canx
P35802	SkEEQELHDIHSTRskER.P35802	4	SkEEQELHDIHSTRskER	0.000101376	5.60087	5.61368	5.8873	5.74551	5.36769	6.01173	6.5821	6.80073	6.59561	6.42544	6.48675	6.08367	7.0635	7.43139	7.17469	7.50813	7.00081	6.83525	7.67413	7.56486	[K].SKEEQELHDIHSTRSKER.[L]	1xPhospho [S15]; 2xTMTpro [K2; K16]; 1xTMTpro [N-Term]	P35802 [256-273]	P35802 1xPhospho [S270]	1	HDIHSTRsKER____	Gpm6a
P35802	SkEEQELHDIHSTRsk.P35802	4	SkEEQELHDIHSTRsk	0.0156353	5.44102	5.44478	5.51115	5.50186	5.5194	5.5758	6.59748	7.14636	6.15749	5.63966	5.91472	5.34731	6.68289	6.86929	6.85279	7.19497	6.68766	6.00484	7.44955	6.95684	[K].SKEEQELHDIHSTRSK.[E]	1xPhospho [S15]; 2xTMTpro [K2; K16]; 1xTMTpro [N-Term]	P35802 [256-271]	P35802 1xPhospho [S270]	1	HDIHSTRsK______	Gpm6a
P35803	AkEEQELQDIQsR.P35803	NA	AkEEQELQDIQsR	0.157019	5.99053	5.7864	6.36598	7.01443	6.41394	5.74448	5.86717	5.37404	6.26322	5.99277	6.17019	5.75094	5.69734	5.95875	5.83828	6.21665	6.04427	5.49855	6.00857	5.61966	[K].AKEEQELQDIQSR.[S]	1xPhospho [S12]; 1xTMTpro [K2]; 1xTMTpro [N-Term]	P35803 [307-319]	P35803 1xPhospho [S318]	1	QELQDIQsR______	Gpm6b
P35831	kVPLQEGPksFDGNTLLNR.P35831	2	kVPLQEGPksFDGNTLLNR	3.84e-07	6.82559	6.66284	6.98141	6.75285	6.91761	7.1873	7.20777	6.9735	7.41571	7.50926	6.51624	6.35677	6.63585	6.64848	6.35018	6.06123	6.04883	6.20556	6.22388	6.15642	[K].KVPLQEGPKSFDGNTLLNR.[G]	1xPhospho [S10]; 2xTMTpro [K1; K9]; 1xTMTpro [N-Term]	P35831 [439-457]	P35831 1xPhospho [S448]	1	PLQEGPKsFDGNTLL	Ptpn12
P35831	NLsFEIk.P35831	2	NLsFEIk	3.58e-08	7.61725	7.62615	7.58261	7.27474	7.35096	7.64865	7.93519	7.64344	8.04604	8.06824	7.25254	6.9218	7.13309	7.07989	7.19444	6.55916	6.35809	6.26107	6.24143	6.19375	[R].NLSFEIK.[K]	1xPhospho [S3]; 1xTMTpro [K7]; 1xTMTpro [N-Term]	P35831 [432-438]	P35831 1xPhospho [S434]	1	_____NLsFEIK___	Ptpn12
P35831	TPsQDSDYINANFIk.P35831	NA	TPsQDSDYINANFIk	0.247609	3.69067	3.68481	4.61424	3.99572	4.238	4.32794	4.06272	3.79825	4.56671	4.26331	3.83368	3.66998	4.06418	3.77246	3.82851	4.24778	3.52169	3.68829	3.8106	4.10591	[K].TPSQDSDYINANFIK.[G]	1xPhospho [S3]; 1xTMTpro [K15]; 1xTMTpro [N-Term]	P35831 [81-95]	P35831 1xPhospho [S83]	1	_____TPsQDSDYIN	Ptpn12
P39053	kTsGNQDEILVIR.P39053	3	kTsGNQDEILVIR	6.56e-07	5.91783	5.84286	5.8225	5.92835	5.84933	6.06347	6.21106	6.44778	6.20394	6.26452	6.6569	6.96647	7.41992	7.37151	7.49427	7.68837	7.30801	7.38529	8.15565	8.14416	[K].KTSGNQDEILVIR.[K]	1xPhospho [S3]; 1xTMTpro [K1]; 1xTMTpro [N-Term]	P39053 [510-522]	P39053 1xPhospho [S512]	1	_____KTsGNQDEIL	Dnm1
P39447	VQIPVSHPDPEPVsDNEDDSYDEEVHDPR.P39447	1	VQIPVSHPDPEPVsDNEDDSYDEEVHDPR	0.00268012	4.66456	4.82765	5.42993	5.27963	5.4014	4.60793	4.63459	4.36544	4.8866	5.02295	4.1521	4.73399	4.43175	4.32349	4.30736	4.6169	4.5857	4.34909	4.26293	4.39693	[K].VQIPVSHPDPEPVSDNEDDSYDEEVHDPR.[A]	1xPhospho [S14]; 1xTMTpro [N-Term]	P39447 [112-140]	P39447 1xPhospho [S125]	1	HPDPEPVsDNEDDSY	Tjp1
P39447	EIsQDSLAAR.P39447	NA	EIsQDSLAAR	0.386315	7.11694	7.36759	7.73085	7.52487	7.76979	7.6562	7.4893	7.45001	8.06338	8.0384	7.42856	7.8088	8.20504	7.76559	7.71562	7.59999	7.80649	7.40166	7.82097	7.64465	[K].EISQDSLAAR.[D]	1xPhospho [S3]; 1xTMTpro [N-Term]	P39447 [210-219]	P39447 1xPhospho [S212]	1	_____EIsQDSLAAR	Tjp1
P39688	LTEERDGsLNQSSGYR.P39688	5	LTEERDGsLNQSSGYR	3.96e-05	7.31046	6.95748	7.14051	7.24337	7.20335	7.18427	7.18705	6.88503	7.053	7.22856	6.88472	6.43237	6.67789	6.83321	7.04763	6.60263	6.44371	6.38807	6.41926	6.48651	[K].LTEERDGSLNQSSGYR.[Y]	1xPhospho [S8]; 1xTMTpro [N-Term]	P39688 [14-29]	P39688 1xPhospho [S21]	1	LTEERDGsLNQSSGY	Fyn
P39688	DGsLNQSSGYR.P39688	5	DGsLNQSSGYR	0.00162846	4.00343	4.39279	4.21659	4.30333	4.42884	3.88823	4.18933	4.10372	4.4626	4.27546	3.4141	3.71923	3.90145	4.09385	4.15553	3.21102	3.57094	3.72448	3.71001	3.64998	[R].DGSLNQSSGYR.[Y]	1xPhospho [S3]; 1xTMTpro [N-Term]	P39688 [19-29]	P39688 1xPhospho [S21]	1	_____DGsLNQSSGY	Fyn
P42208	IYHLPDAEsDEDEDFkEQTR.P42208	6	IYHLPDAEsDEDEDFkEQTR	0.0316344	6.89117	6.45293	7.25437	7.18583	7.01078	6.97999	6.71294	6.52679	6.43669	6.82899	6.91804	6.85113	7.37246	6.79188	7.53975	7.7847	6.90221	7.2253	7.39835	7.58035	[K].IYHLPDAESDEDEDFKEQTR.[L]	1xPhospho [S9]; 1xTMTpro [K16]; 1xTMTpro [N-Term]	P42208 [210-229]	P42208 1xPhospho [S218]	1	YHLPDAEsDEDEDFK	Septin2
P42859	RHsLScTk.P42859	3	RHsLScTk	2.04e-08	6.10754	6.0557	6.4518	6.42769	6.16363	7.05704	7.27203	7.27642	7.51023	7.59592	8.17457	7.99733	8.37095	8.54464	8.70053	8.62813	8.31638	7.94752	8.48929	8.38859	[K].RHSLSCTK.[S]	1xCarbamidomethyl [C6]; 1xPhospho [S3]; 1xTMTpro [K8]; 1xTMTpro [N-Term]	P42859 [1839-1846]	P42859 1xPhospho [S1841]	1	_____RHsLSCTK__	Htt
P43006	TQsIYDDkNHR.P43006	8	TQsIYDDkNHR	0.116882	5.63513	5.62351	5.71511	5.81342	6.02501	5.78916	6.43797	5.65039	6.14991	5.90212	6.4051	5.66181	6.08199	6.74594	7.12345	5.97206	6.10618	5.71762	6.58647	5.82656	[K].TQSIYDDKNHR.[E]	1xPhospho [S3]; 1xTMTpro [K8]; 1xTMTpro [N-Term]	P43006 [518-528]	P43006 1xPhospho [S520]	1	_____TQsIYDDKNH	Slc1a2
P43006	SADcsVEEEPWkR.P43006	3	SADcsVEEEPWkR	8.95e-07	5.82572	6.12063	6.35504	6.24329	6.29189	6.15917	6.06998	6.54234	6.31789	6.46879	6.74411	7.0465	7.29501	7.22165	7.7352	7.62566	7.5726	7.61543	7.77326	7.99827	[K].SADCSVEEEPWKR.[E]	1xCarbamidomethyl [C4]; 1xPhospho [S5]; 1xTMTpro [K12]; 1xTMTpro [N-Term]	P43006 [558-570]	P43006 1xPhospho [S562]	1	___SADCsVEEEPWK	Slc1a2
P46096	DDDAETGLtDGEEk.P46096	6	DDDAETGLtDGEEk	0.00169776	4.51577	5.31131	5.06436	5.49546	5.18976	4.70301	4.76551	4.64925	4.99156	4.99404	4.77354	5.35699	5.23	5.19649	5.26215	5.73678	5.5083	5.44916	5.67554	5.93585	[K].DDDAETGLTDGEEK.[E]	1xPhospho [T9]; 1xTMTpro [K14]; 1xTMTpro [N-Term]	P46096 [120-133]	P46096 1xPhospho [T128]	1	DDAETGLtDGEEK__	Syt1
P46460	TkENRQsIINPDWNFEk.P46460	6	TkENRQsIINPDWNFEk	0.0025707	5.75131	6.01664	6.72232	6.77891	6.84624	5.60373	5.41402	5.33044	6.28345	6.43543	6.36174	7.01542	6.20706	6.25826	6.71078	7.5732	7.5379	7.44323	6.92181	6.71673	[K].TKENRQSIINPDWNFEK.[M]	1xPhospho [S7]; 2xTMTpro [K2; K17]; 1xTMTpro [N-Term]	P46460 [201-217]	P46460 1xPhospho [S207]	1	_TKENRQsIINPDWN	Nsf
P46460	EEGAsPLDFD.P46460	6	EEGAsPLDFD	0.00864932	4.26449	4.56925	4.77594	4.71829	4.42353	4.33277	4.0487	4.65985	4.22674	4.35266	4.43522	4.20104	4.52436	4.56466	4.65344	5.09507	4.65107	4.60476	5.36709	5.03781	[R].EEGASPLDFD.[-]	1xPhospho [S5]; 1xTMTpro [N-Term]	P46460 [735-744]	P46460 1xPhospho [S739]	1	___EEGAsPLDFD__	Nsf
P46660	GANEsLER.P46660	4	GANEsLER	0.000775695	5.3518	5.33299	5.15166	5.72426	4.95571	5.15719	5.69026	6.31463	5.70441	5.50599	5.73207	5.69579	7.10616	6.58794	7.28409	7.13872	6.73373	6.41619	7.24935	6.99336	[R].GANESLER.[Q]	1xPhospho [S5]; 1xTMTpro [N-Term]	P46660 [331-338]	P46660 1xPhospho [S335]	1	___GANEsLER____	Ina
P46660	VFGDSSRLsAR.P46660	6	VFGDSSRLsAR	0.0187409	4.91516	5.07724	4.7738	5.2027	5.2054	4.77078	4.67414	4.44172	5.11241	4.79072	4.81369	5.92214	5.57822	5.10466	5.2117	5.35763	5.14423	5.30076	5.38046	5.41732	[K].VFGDSSRLSAR.[L]	1xPhospho [S9]; 1xTMTpro [N-Term]	P46660 [18-28]	P46660 1xPhospho [S26]	1	FGDSSRLsAR_____	Ina
P46660	LSGPGGSGsFR.P46660	6	LSGPGGSGsFR	0.000656186	6.86412	6.91096	7.15824	7.12059	7.23844	6.78074	6.51199	6.68338	6.97035	7.01257	7.15747	7.97648	7.35224	7.32558	7.68245	7.43855	7.28783	7.4414	7.62658	7.56816	[R].LSGPGGSGSFR.[S]	1xPhospho [S9]; 1xTMTpro [N-Term]	P46660 [29-39]	P46660 1xPhospho [S37]	1	SGPGGSGsFR_____	Ina
P46935	RPSPDDDLtDEDNDDmQLQAQR.P46935	5	RPSPDDDLtDEDNDDmQLQAQR	6.83e-05	5.69149	6.18254	6.18102	5.80641	6.21713	5.64606	5.51121	5.24536	5.55862	5.7655	5.34542	5.40803	5.50776	5.1819	5.36513	4.66181	5.14139	5.16148	5.01476	5.2834	[K].RPSPDDDLTDEDNDDMQLQAQR.[A]	1xPhospho [T9]; 1xOxidation [M16]; 1xTMTpro [N-Term]	P46935 [279-300]	P46935 1xPhospho [T287]	1	PSPDDDLtDEDNDDM	Nedd4
P46935	RQIsEDVDGPDNR.P46935	5	RQIsEDVDGPDNR	0.061453	5.92728	5.62242	5.90015	5.74141	5.96331	5.42299	5.88385	6.00802	6.11213	5.73005	5.18939	5.07817	5.4792	5.60564	5.88693	5.2893	5.45519	5.33434	5.93256	5.43319	[R].RQISEDVDGPDNR.[E]	1xPhospho [S4]; 1xTMTpro [N-Term]	P46935 [306-318]	P46935 1xPhospho [S309]	1	____RQIsEDVDGPD	Nedd4
P47708	DSEGWDHAHGGGTGDTSRsPAGLRR.P47708	3	DSEGWDHAHGGGTGDTSRsPAGLRR	0.00175531	4.99306	4.78125	4.76496	4.59003	4.75893	4.9257	4.7785	4.61826	4.87331	5.29503	5.41151	5.33784	5.54302	5.68267	5.4914	5.33081	4.90439	5.67215	6.19487	6.03419	[R].DSEGWDHAHGGGTGDTSRSPAGLRR.[A]	1xPhospho [S19]; 1xTMTpro [N-Term]	P47708 [244-268]	P47708 1xPhospho [S262]	1	GTGDTSRsPAGLRR_	Rph3a
P47708	WHQLQNENHVSsD.P47708	6	WHQLQNENHVSsD	4.24e-05	5.60435	5.87374	6.00763	5.88688	6.08251	5.57198	5.5583	5.69273	5.64815	5.72552	5.93909	6.46424	6.33775	6.37943	6.64785	6.32994	6.35554	6.56569	6.86537	6.9105	[R].WHQLQNENHVSSD.[-]	1xPhospho [S12]; 1xTMTpro [N-Term]	P47708 [669-681]	P47708 1xPhospho [S680]	1	QNENHVSsD______	Rph3a
P47708	sPAGLR.P47708	6	sPAGLR	0.000110725	5.86825	5.79822	6.21246	6.54431	6.46605	5.57556	5.34697	5.76762	5.77641	5.77694	5.72532	6.16331	6.58173	6.35389	6.54684	7.04914	6.71826	6.741	6.90385	7.18523	[R].SPAGLR.[R]	1xPhospho [S1]; 1xTMTpro [N-Term]	P47708 [262-267]	P47708 1xPhospho [S262]	1	_______sPAGLR__	Rph3a
P47809	THsIESSGk.P47809	4	THsIESSGk	0.005295	4.9495	4.86238	5.23397	4.8695	5.31142	5.20007	5.76419	5.81191	5.88475	5.47694	5.39819	5.60111	6.46701	6.22226	5.78082	5.58741	5.80028	5.62356	6.38431	5.85555	[R].THSIESSGK.[L]	1xPhospho [S3]; 1xTMTpro [K9]; 1xTMTpro [N-Term]	P47809 [76-84]	P47809 1xPhospho [S78]	1	_____THsIESSGK_	Map2k4
P47941	YPsPPVGSVSAPNLPTAEENLEYVR.P47941	5	YPsPPVGSVSAPNLPTAEENLEYVR	0.211923	3.47834	4.14233	4.17464	4.26731	4.47356	3.81665	4.03442	4.03548	4.13321	4.15874	3.49062	2.98357	4.03215	3.97414	4.02284	4.09609	4.23027	3.89984	4.10679	4.01936	[R].YPSPPVGSVSAPNLPTAEENLEYVR.[T]	1xPhospho [S3]; 1xTMTpro [N-Term]	P47941 [105-129]	P47941 1xPhospho [S107]	1	_____YPsPPVGSVS	Crkl
P48453	IcsFEEAkGLDR.P48453	3	IcsFEEAkGLDR	0.000117301	5.98362	5.78982	6.78928	6.27992	6.51226	7.02677	6.68998	6.14805	6.52115	7.32499	7.42462	7.29054	7.62413	7.52758	7.62086	7.92654	7.67203	7.19998	7.46128	7.68213	[R].ICSFEEAKGLDR.[I]	1xCarbamidomethyl [C2]; 1xPhospho [S3]; 1xTMTpro [K8]; 1xTMTpro [N-Term]	P48453 [477-488]	P48453 1xPhospho [S479]	1	_____ICsFEEAKGL	Ppp3cb
P48453	IcsFEEAk.P48453	4	IcsFEEAk	0.000279755	8.0869	7.9815	8.1691	7.41572	7.55814	8.66277	9.23939	9.60847	9.1406	8.88135	8.91054	8.81021	10.1986	10.0137	10.2817	9.74177	9.45973	8.89161	10.0898	9.60277	[R].ICSFEEAK.[G]	1xCarbamidomethyl [C2]; 1xPhospho [S3]; 1xTMTpro [K8]; 1xTMTpro [N-Term]	P48453 [477-484]	P48453 1xPhospho [S479]	1	_____ICsFEEAK__	Ppp3cb
P48678	LRLsPSPTSQR.P48678	6	LRLsPSPTSQR	0.0549942	5.47698	5.66488	5.76539	7.09563	5.94549	5.01334	5.07476	4.93294	5.38037	5.42269	5.13658	5.25041	5.64261	5.52224	5.56709	5.61203	5.08436	5.31811	5.70485	6.20059	[R].LRLSPSPTSQR.[S]	1xPhospho [S4]; 1xTMTpro [N-Term]	P48678 [387-397]	P48678 1xPhospho [S390]	1	____LRLsPSPTSQR	Lmna
P48678	LSPsPTSQR.P48678	NA	LSPsPTSQR	0.30215	5.46276	5.86444	6.24781	6.33709	6.46894	5.47367	5.37273	5.49333	5.66289	6.05112	5.62723	5.78693	6.50082	6.13268	6.14636	5.45675	5.49959	5.6615	6.31719	6.58843	[R].LSPSPTSQR.[S]	1xPhospho [S4]; 1xTMTpro [N-Term]	P48678 [389-397]	P48678 1xPhospho [S392]	1	____LSPsPTSQR__	Lmna
P48722	cHAEHtPEEEIDHTGAk.P48722	3	cHAEHtPEEEIDHTGAk	0.000162452	4.53812	4.82428	4.69785	3.94965	5.21652	4.94646	4.7048	4.92604	4.94856	5.5116	5.35102	5.88373	5.72505	5.73038	5.95637	5.87591	5.52955	5.94382	6.49565	6.37394	[K].CHAEHTPEEEIDHTGAK.[A]	1xCarbamidomethyl [C1]; 1xPhospho [T6]; 1xTMTpro [K17]; 1xTMTpro [N-Term]	P48722 [540-556]	P48722 1xPhospho [T545]	1	__CHAEHtPEEEIDH	Hspa4l
P48722	LHGRsFDDPIVQTER.P48722	3	LHGRsFDDPIVQTER	3.39e-06	4.90681	5.22819	5.70622	5.4934	5.78289	5.31842	5.26506	5.38434	5.55387	5.43559	5.87519	6.26334	5.95641	6.05516	6.16261	6.43543	6.42158	6.61798	6.6047	6.56329	[K].LHGRSFDDPIVQTER.[I]	1xPhospho [S5]; 1xTMTpro [N-Term]	P48722 [70-84]	P48722 1xPhospho [S74]	1	___LHGRsFDDPIVQ	Hspa4l
P49025	DksPGRPLER.P49025	3	DksPGRPLER	0.00120465	5.61446	5.82304	6.1705	6.38324	6.42819	6.20722	5.99615	6.45104	6.2006	6.39853	6.40753	6.65629	6.76934	6.70111	6.72833	6.65765	6.64954	6.86835	6.75835	6.73383	[R].DKSPGRPLER.[E]	1xPhospho [S3]; 1xTMTpro [K2]; 1xTMTpro [N-Term]	P49025 [1997-2006]	P49025 1xPhospho [S1999]	1	_____DKsPGRPLER	Cit
P49025	RVsEVEAVLSQk.P49025	4	RVsEVEAVLSQk	0.000283438	5.4771	5.32393	5.11416	5.26384	5.52584	5.78854	5.92291	5.88379	5.98459	5.84629	5.98664	5.93293	6.42873	6.35323	6.72369	6.16827	6.07785	5.70114	6.58659	6.31038	[R].RVSEVEAVLSQK.[E]	1xPhospho [S3]; 1xTMTpro [K12]; 1xTMTpro [N-Term]	P49025 [477-488]	P49025 1xPhospho [S479]	1	_____RVsEVEAVLS	Cit
P49025	ERsPGRLFEDSSR.P49025	NA	ERsPGRLFEDSSR	0.209996	5.28869	5.90491	6.23124	6.12625	6.39008	6.00472	5.77079	5.73023	5.83415	6.39749	6.21084	6.45877	6.27467	6.13706	6.15551	6.01161	6.16231	6.27335	6.35443	6.6085	[R].ERSPGRLFEDSSR.[G]	1xPhospho [S3]; 1xTMTpro [N-Term]	P49025 [2019-2031]	P49025 1xPhospho [S2021]	1	_____ERsPGRLFED	Cit
P49025	EksPGR.P49025	4	EksPGR	0.000178361	6.24189	5.68281	5.79016	5.95491	5.96899	6.55744	6.52125	6.50029	6.73994	7.0726	6.82173	6.49897	7.5887	7.09741	7.17304	6.79432	6.6917	6.84962	7.12958	7.20005	[R].EKSPGR.[M]	1xPhospho [S3]; 1xTMTpro [K2]; 1xTMTpro [N-Term]	P49025 [2007-2012]	P49025 1xPhospho [S2009]	1	_____EKsPGR____	Cit
P49312	SEsPkEPEQLR.P49312	1	SEsPkEPEQLR	0.010213	6.9997	6.53985	7.19071	7.22758	7.29302	6.16578	6.739	6.68632	6.79266	6.32353	6.59425	5.99567	6.99755	6.73156	6.58454	6.30826	6.40153	5.88646	6.23363	6.46258	[K].SESPKEPEQLR.[K]	1xPhospho [S3]; 1xTMTpro [K5]; 1xTMTpro [N-Term]	P49312 [4-14]	P49312 1xPhospho [S6]	1	_____SEsPKEPEQL	Hnrnpa1
P49312	SEsPkEPEQLRk.P49312	2	SEsPkEPEQLRk	0.0328003	8.23318	7.77454	8.16256	8.49281	7.97494	7.78953	8.3751	8.26406	8.10527	7.83642	7.75159	6.68331	8.24838	8.03468	8.33839	7.31127	7.20194	7.01541	7.64712	7.43404	[K].SESPKEPEQLRK.[L]	1xPhospho [S3]; 2xTMTpro [K5; K12]; 1xTMTpro [N-Term]	P49312 [4-15]	P49312 1xPhospho [S6]	1	_____SEsPKEPEQL	Hnrnpa1
P51830	LNVSksV.P51830	3	LNVSksV	8.06e-08	4.86284	5.40962	5.66966	5.23284	4.81678	5.98011	5.72065	6.14317	6.30967	6.35388	6.60207	7.01783	7.19309	7.07469	7.35977	7.48181	7.33052	7.35594	7.64206	7.52853	[K].LNVSKSV.[-]	1xPhospho [S6]; 1xTMTpro [K5]; 1xTMTpro [N-Term]	P51830 [1347-1353]	P51830 1xPhospho [S1352]	1	__LNVSKsV______	Adcy9
P52734	SLsLDPGQSLEPHPEGPQR.P52734	1	SLsLDPGQSLEPHPEGPQR	2.93e-05	6.01653	5.98022	5.85936	6.01377	6.13604	5.28788	5.49721	5.3716	5.67814	5.64846	5.31882	5.66365	5.47588	5.21153	5.44628	5.00816	5.15491	5.17294	5.5039	5.0773	[K].SLSLDPGQSLEPHPEGPQR.[L]	1xPhospho [S3]; 1xTMTpro [N-Term]	P52734 [114-132]	P52734 1xPhospho [S116]	1	_____SLsLDPGQSL	Fgd1
P52795	AAALSLSTLAsPk.P52795	2	AAALSLSTLAsPk	0.0129279	3.97929	3.65855	3.78418	3.77351	3.90805	3.6371	4.37786	4.79012	4.45934	4.00348	3.34996	3.0362	3.38418	3.741	3.38554	4.12136	3.22183	2.65728	3.55011	3.68407	[R].AAALSLSTLASPK.[G]	1xPhospho [S11]; 1xTMTpro [K13]; 1xTMTpro [N-Term]	P52795 [276-288]	P52795 1xPhospho [S286]	1	LSLSTLAsPK_____	Efnb1
P54227	ASGQAFELILsPR.P54227	5	ASGQAFELILsPR	6.13e-06	5.87693	5.55423	5.4261	5.77058	5.8847	5.06923	4.58824	4.48362	4.86302	5.06964	4.72311	4.9382	4.44465	4.78652	4.38612	4.60161	3.63504	4.11963	3.96222	4.13151	[R].ASGQAFELILSPR.[S]	1xPhospho [S11]; 1xTMTpro [N-Term]	P54227 [15-27]	P54227 1xPhospho [S25]	1	QAFELILsPR_____	Stmn1
P54227	SkESVPDFPLsPPk.P54227	5	SkESVPDFPLsPPk	5.78e-05	8.07762	7.64568	7.70259	7.71856	7.56822	7.10831	7.60903	7.80848	7.93793	7.4452	6.58978	6.82062	7.07308	7.23717	7.07576	6.88503	6.78917	6.66736	6.87409	6.7441	[R].SKESVPDFPLSPPK.[K]	1xPhospho [S11]; 2xTMTpro [K2; K14]; 1xTMTpro [N-Term]	P54227 [28-41]	P54227 1xPhospho [S38]	1	SVPDFPLsPPK____	Stmn1
P54285	VEEHsPLER.P54285	4	VEEHsPLER	0.00180157	5.88799	5.7409	6.02605	5.98802	5.64061	5.52117	5.51138	6.00177	6.14403	5.6431	5.64325	6.1543	6.46343	6.33493	6.53177	6.6784	6.49601	6.22084	6.82973	6.65886	[R].VEEHSPLER.[D]	1xPhospho [S5]; 1xTMTpro [N-Term]	P54285 [389-397]	P54285 1xPhospho [S393]	1	___VEEHsPLER___	Cacnb3
P54285	SGNPSSLGDIGNRRsPPPSLAk.P54285	3	SGNPSSLGDIGNRRsPPPSLAk	0.00012298	6.49011	6.61791	6.38557	6.55186	6.90968	6.62009	6.68264	6.83482	6.74266	7.10754	7.08722	7.09949	7.11509	7.18469	7.25636	7.02662	7.11268	7.17921	7.30459	7.33859	[R].SGNPSSLGDIGNRRSPPPSLAK.[Q]	1xPhospho [S15]; 1xTMTpro [K22]; 1xTMTpro [N-Term]	P54285 [138-159]	P54285 1xPhospho [S152]	1	GDIGNRRsPPPSLAK	Cacnb3
P54285	RsPPPSLAk.P54285	NA	RsPPPSLAk	0.71452	4.50105	4.77004	4.52398	4.99014	5.0198	4.6034	5.01655	5.26281	5.02759	4.60822	4.42669	4.52406	5.05969	5.18529	5.34006	4.89722	4.75661	4.76459	5.23221	5.32329	[R].RSPPPSLAK.[Q]	1xPhospho [S2]; 1xTMTpro [K9]; 1xTMTpro [N-Term]	P54285 [151-159]	P54285 1xPhospho [S152]	1	______RsPPPSLAK	Cacnb3
P55821	RksQEAQVLk.P55821	5	RksQEAQVLk	2.27e-07	8.21538	7.90049	8.17381	8.04948	8.32773	8.64338	8.71932	8.32388	8.41575	8.35468	7.60461	7.24532	7.59165	7.59751	7.78927	7.19334	7.22922	7.1492	7.38231	7.32988	[R].RKSQEAQVLK.[Q]	1xPhospho [S3]; 2xTMTpro [K2; K10]; 1xTMTpro [N-Term]	P55821 [95-104]	P55821 1xPhospho [S97]	1	_____RKsQEAQVLK	Stmn2
P55821	TLAsPk.P55821	5	TLAsPk	7.6e-07	10.1257	9.77296	10.4764	10.169	9.75827	9.79057	10.4388	9.79943	10.6597	10.4685	8.94603	8.38709	8.79376	9.12232	8.9862	8.60538	8.45197	8.34926	8.36131	8.34112	[R].TLASPK.[K]	1xPhospho [S4]; 1xTMTpro [K6]; 1xTMTpro [N-Term]	P55821 [70-75]	P55821 1xPhospho [S73]	1	____TLAsPK_____	Stmn2
P55821	RAsGQAFELILkPPsPISEAPR.P55821	5	RAsGQAFELILkPPsPISEAPR	0.000483468	5.1898	5.79518	5.81993	5.5357	5.79692	5.66096	5.85446	5.19724	5.72247	5.60023	5.10969	4.56802	4.9218	5.06666	5.08575	5.05982	4.90672	4.4011	5.01613	4.98827	[K].RASGQAFELILKPPSPISEAPR.[T]	2xPhospho [S3; S15]; 1xTMTpro [K12]; 1xTMTpro [N-Term]	P55821 [48-69]	P55821 2xPhospho [S50; S62]	2	_____RAsGQAFELI	Stmn2
P55821	NkELQVELsG.P55821	5	NkELQVELsG	7.24e-08	7.1586	6.94092	7.01701	6.88233	7.06465	6.46053	6.64246	6.13317	6.96752	6.86034	5.47241	5.39568	5.09463	5.61613	4.92555	4.82067	4.65352	4.78742	5.31432	5.16644	[R].NKELQVELSG.[-]	1xPhospho [S9]; 1xTMTpro [K2]; 1xTMTpro [N-Term]	P55821 [170-179]	P55821 1xPhospho [S178]	1	KELQVELsG______	Stmn2
P56399	ATNNsLER.P56399	3	ATNNsLER	6.16e-09	5.2642	4.92714	5.30023	4.18403	5.46099	6.71216	6.5244	7.25927	7.02627	7.31992	8.44197	8.37251	8.79216	9.16025	9.3225	9.10197	9.04672	9.21069	9.57713	9.78064	[R].ATNNSLER.[A]	1xPhospho [S5]; 1xTMTpro [N-Term]	P56399 [747-754]	P56399 1xPhospho [S751]	1	___ATNNsLER____	Usp5
P56695	LVsSESk.P56695	4	LVsSESk	0.118788	3.84164	4.45551	4.57255	4.31984	4.35739	4.37375	4.9718	4.86895	4.92221	4.56663	5.21736	4.58392	5.19263	5.32011	5.15584	5.40315	4.95849	3.52256	5.74369	5.46887	[R].LVSSESK.[N]	1xPhospho [S3]; 1xTMTpro [K7]; 1xTMTpro [N-Term]	P56695 [234-240]	P56695 1xPhospho [S236]	1	_____LVsSESK___	Wfs1
P58871	SSGSLsPGLETEDPLEAR.P58871	3	SSGSLsPGLETEDPLEAR	0.0170028	6.72215	6.7301	6.81308	6.54322	7.01573	6.84211	6.72741	6.81214	6.94405	7.06215	6.84636	6.9226	7.1908	7.23477	7.18315	6.97364	7.02836	6.98356	7.31585	7.3288	[K].SSGSLSPGLETEDPLEAR.[E]	1xPhospho [S6]; 1xTMTpro [N-Term]	P58871 [1370-1387]	P58871 1xPhospho [S1375]	1	__SSGSLsPGLETED	Tnks1bp1
P58871	DRQsPSTcSEGLLGWAQk.P58871	2	DRQsPSTcSEGLLGWAQk	0.0749109	5.86587	6.25433	6.27209	5.81234	6.24708	6.10606	6.15783	6.36285	6.20267	5.91237	5.57074	5.73668	5.75074	6.18782	5.9414	5.52185	5.74793	5.56214	6.00649	6.1247	[K].DRQSPSTCSEGLLGWAQK.[D]	1xCarbamidomethyl [C8]; 1xPhospho [S4]; 1xTMTpro [K18]; 1xTMTpro [N-Term]	P58871 [710-727]	P58871 1xPhospho [S713]	1	____DRQsPSTCSEG	Tnks1bp1
P58871	SQEGTAEIPAEcQEEHSktPEER.P58871	NA	SQEGTAEIPAEcQEEHSktPEER	0.260873	4.75689	4.98326	5.309	4.28027	4.84484	4.86003	4.96192	5.01332	5.34044	5.4003	4.99678	5.35737	4.92443	5.43536	5.34407	4.84641	5.10515	4.88369	5.23377	5.56106	[R].SQEGTAEIPAECQEEHSKTPEER.[N]	1xCarbamidomethyl [C12]; 1xPhospho [T19]; 1xTMTpro [K18]; 1xTMTpro [N-Term]	P58871 [220-242]	P58871 1xPhospho [T238]	1	CQEEHSKtPEER___	Tnks1bp1
P58871	ENYEDQEPLVGHEsPITLAAR.P58871	1	ENYEDQEPLVGHEsPITLAAR	0.022386	5.93586	6.01691	5.94768	6.55236	6.23917	5.8602	5.7095	5.71225	6.06849	6.15021	5.63626	5.77286	5.92427	5.7589	6.12211	5.53454	5.82098	5.44086	5.62321	5.8084	[K].ENYEDQEPLVGHESPITLAAR.[E]	1xPhospho [S14]; 1xTMTpro [N-Term]	P58871 [589-609]	P58871 1xPhospho [S602]	1	EPLVGHEsPITLAAR	Tnks1bp1
P58871	RFsEGVLQPPSQDQEk.P58871	NA	RFsEGVLQPPSQDQEk	0.124875	6.4438	6.4462	6.64771	6.6065	6.77229	6.62993	6.41548	6.1925	6.74146	6.96063	6.56044	6.83023	7.03532	6.79376	7.14048	6.81191	6.81862	6.61583	6.74973	6.90805	[R].RFSEGVLQPPSQDQEK.[L]	1xPhospho [S3]; 1xTMTpro [K16]; 1xTMTpro [N-Term]	P58871 [427-442]	P58871 1xPhospho [S429]	1	_____RFsEGVLQPP	Tnks1bp1
P58871	DVGHLEEGASGGLLsPSTPHSR.P58871	NA	DVGHLEEGASGGLLsPSTPHSR	0.890665	6.382	6.06403	6.40414	6.55799	6.57002	6.30813	6.25396	6.22281	6.2586	6.58209	6.10929	6.35399	6.21515	6.58721	6.55801	6.2185	6.23977	6.40499	6.48038	6.76602	[R].DVGHLEEGASGGLLSPSTPHSR.[D]	1xPhospho [S15]; 1xTMTpro [N-Term]	P58871 [1008-1029]	P58871 1xPhospho [S1022]	1	GASGGLLsPSTPHSR	Tnks1bp1
P58871	VSGAGLsPSR.P58871	NA	VSGAGLsPSR	0.157374	6.61102	6.44113	6.76867	6.8224	6.79304	6.21064	6.29413	6.52864	6.49969	6.37767	6.30265	6.48145	6.84204	6.53222	6.74044	6.25358	6.27631	6.18955	6.66413	6.83783	[R].VSGAGLSPSR.[K]	1xPhospho [S7]; 1xTMTpro [N-Term]	P58871 [1125-1134]	P58871 1xPhospho [S1131]	1	_VSGAGLsPSR____	Tnks1bp1
P58871	NRsAEEGEVTESk.P58871	4	NRsAEEGEVTESk	0.0363078	3.59861	3.74388	3.82652	4.10153	3.50243	3.90524	4.30793	4.46779	4.45498	4.25332	3.84137	4.1753	4.98511	4.90256	4.47483	4.2319	4.28293	3.84701	4.91674	4.33346	[R].NRSAEEGEVTESK.[S]	1xPhospho [S3]; 1xTMTpro [K13]; 1xTMTpro [N-Term]	P58871 [1655-1667]	P58871 1xPhospho [S1657]	1	_____NRsAEEGEVT	Tnks1bp1
P59017	kksHTGEAAAVR.P59017	3	kksHTGEAAAVR	0.000568559	7.06196	6.35568	7.01939	7.09089	7.09533	6.92	7.1179	6.81304	7.14539	6.98161	7.50341	7.0668	7.57882	7.68814	7.73389	7.84076	7.49353	7.49454	7.8782	7.67782	[R].KKSHTGEAAAVR.[G]	1xPhospho [S3]; 2xTMTpro [K1; K2]; 1xTMTpro [N-Term]	P59017 [385-396]	P59017 1xPhospho [S387]	1	_____KKsHTGEAAA	Bcl2l13
P59281	ASADNsPGR.P59281	4	ASADNsPGR	0.0576432	6.17531	6.07931	6.2544	6.36577	5.92914	6.12103	6.63909	7.33392	6.97326	6.51306	6.22813	6.36014	6.89181	7.14431	7.40266	6.95376	6.8134	6.39917	6.92492	6.77306	[R].ASADNSPGR.[G]	1xPhospho [S6]; 1xTMTpro [N-Term]	P59281 [118-126]	P59281 1xPhospho [S123]	1	__ASADNsPGR____	Arhgap39
P59281	QNTEsPR.P59281	7	QNTEsPR	0.00808606	4.83333	4.54736	4.74988	4.85358	4.8539	4.77332	5.31994	5.71132	5.25171	5.27148	4.69723	4.72711	5.19426	5.45049	5.36103	4.63758	4.74424	4.36245	4.77564	4.44866	[K].QNTESPR.[A]	1xPhospho [S5]; 1xTMTpro [N-Term]	P59281 [111-117]	P59281 1xPhospho [S115]	1	___QNTEsPR_____	Arhgap39
P59281	RPSGSQHsPNLQTFVPDTDGTVFFPER.P59281	5	RPSGSQHsPNLQTFVPDTDGTVFFPER	0.0574754	4.40477	4.22537	4.544	4.22635	4.57938	4.09732	3.7786	3.923	4.22108	4.33721	3.62021	4.112	4.09469	3.79447	3.96642	4.10113	3.52482	4.23418	4.3371	4.29944	[R].RPSGSQHSPNLQTFVPDTDGTVFFPER.[R]	1xPhospho [S8]; 1xTMTpro [N-Term]	P59281 [240-266]	P59281 1xPhospho [S247]	1	RPSGSQHsPNLQTFV	Arhgap39
P59281	ASLtPVkAEADLVR.P59281	5	ASLtPVkAEADLVR	0.0347247	7.60217	7.68665	7.51074	7.64457	7.70385	7.4857	7.3158	7.67146	7.4217	7.47911	7.62214	7.17018	7.36725	7.34325	7.20914	7.05611	7.01626	6.97474	7.60701	7.50176	[R].ASLTPVKAEADLVR.[G]	1xPhospho [T4]; 1xTMTpro [K7]; 1xTMTpro [N-Term]	P59281 [527-540]	P59281 1xPhospho [T530]	1	____ASLtPVKAEAD	Arhgap39
P59281	FLsLEYSPVGk.P59281	NA	FLsLEYSPVGk	0.27661	4.72506	4.84848	5.06919	4.91273	4.71579	4.95787	5.08404	4.61878	5.05691	5.03242	4.87337	3.85965	5.01978	4.63039	4.63985	4.65431	5.06296	4.03483	4.72315	4.58404	[R].FLSLEYSPVGK.[E]	1xPhospho [S3]; 1xTMTpro [K11]; 1xTMTpro [N-Term]	P59281 [378-388]	P59281 1xPhospho [S380]	1	_____FLsLEYSPVG	Arhgap39
P59281	AFsEDEALAQQDSk.P59281	8	AFsEDEALAQQDSk	0.00563265	7.8976	7.87366	7.91376	7.89057	7.83592	8.20624	8.19249	8.11458	8.44773	8.58402	8.42384	7.92193	8.32453	8.46682	8.4057	8.15897	8.04783	8.08163	8.43465	8.29547	[R].AFSEDEALAQQDSK.[H]	1xPhospho [S3]; 1xTMTpro [K14]; 1xTMTpro [N-Term]	P59281 [595-608]	P59281 1xPhospho [S597]	1	_____AFsEDEALAQ	Arhgap39
P59644	SPsPQSR.P59644	3	SPsPQSR	0.00234205	3.16207	3.62418	3.8151	3.88078	3.00952	3.81068	3.76914	3.69535	4.0506	4.41845	3.81222	4.64873	4.48119	5.39441	5.78136	4.69039	4.73082	4.77055	4.49843	4.5543	[R].SPSPQSR.[Q]	1xPhospho [S3]; 1xTMTpro [N-Term]	P59644 [909-915]	P59644 1xPhospho [S911]	1	_____SPsPQSR___	Inpp5j
P59644	AQAFSDPRLsPSFR.P59644	NA	AQAFSDPRLsPSFR	0.220716	6.26225	6.19643	6.33028	7.09398	6.4633	6.76954	6.66218	6.73002	6.8078	6.65309	6.86266	6.16184	6.82558	6.61756	6.18246	6.16459	6.09256	6.19012	6.60825	6.56147	[R].AQAFSDPRLSPSFR.[A]	1xPhospho [S10]; 1xTMTpro [N-Term]	P59644 [270-283]	P59644 1xPhospho [S279]	1	AFSDPRLsPSFR___	Inpp5j
P59764	AsPLLSDk.P59764	NA	AsPLLSDk	0.771665	3.55541	2.9548	3.20818	3.33145	3.02642	2.70955	3.21308	3.91273	3.12545	2.80067	3.17233	3.29768	4.07061	3.67656	3.15531	3.2752	3.49592	1.84837	3.81745	3.56981	[R].ASPLLSDK.[H]	1xPhospho [S2]; 1xTMTpro [K8]; 1xTMTpro [N-Term]	P59764 [1708-1715]	P59764 1xPhospho [S1709]	1	______AsPLLSDK_	Dock4
P60335	QIcLVmLETLSQsPQGR.P60335	5	QIcLVmLETLSQsPQGR	0.0885642	4.88321	4.13508	4.63081	4.60706	4.68104	4.69158	4.47533	4.0597	4.32447	4.35915	4.49117	3.75102	4.01221	4.18446	4.15917	3.87314	3.85379	3.89973	4.385	4.68623	[K].QICLVMLETLSQSPQGR.[V]	1xCarbamidomethyl [C3]; 1xPhospho [S13]; 1xOxidation [M6]; 1xTMTpro [N-Term]	P60335 [161-177]	P60335 1xPhospho [S173]	1	MLETLSQsPQGR___	Pcbp1
P60469	YSQAPTLPSGAPLDPYGAGsGR.P60469	NA	YSQAPTLPSGAPLDPYGAGsGR	0.306355	4.53509	4.479	5.13192	4.87471	4.37608	4.3141	4.21692	4.45677	4.95144	4.621	4.37099	4.72546	4.81705	4.58402	4.79297	4.19513	4.43405	4.60646	4.52364	4.21833	[R].YSQAPTLPSGAPLDPYGAGSGR.[A]	1xPhospho [S20]; 1xTMTpro [N-Term]	P60469 [518-539]	P60469 1xPhospho [S537]	1	LDPYGAGsGR_____	Ppfia3
P60469	GEGPAVPGDtPPPTPR.P60469	4	GEGPAVPGDtPPPTPR	0.0260414	6.95188	7.07587	7.21544	7.22418	7.22598	7.14505	7.56506	8.0658	7.73953	7.54347	7.24042	7.34163	7.61726	7.92974	8.10353	7.64696	7.56929	7.50655	8.04695	7.97571	[R].GEGPAVPGDTPPPTPR.[S]	1xPhospho [T10]; 1xTMTpro [N-Term]	P60469 [705-720]	P60469 1xPhospho [T714]	1	GPAVPGDtPPPTPR_	Ppfia3
P60469	EGTDkTNHVSkEEAGVPRGEGPAVPGDtPPPTPR.P60469	8	EGTDkTNHVSkEEAGVPRGEGPAVPGDtPPPTPR	0.0544859	4.72321	4.71954	4.52977	5.07002	5.11201	5.29265	4.63572	4.45095	4.79892	5.33761	5.1959	5.76484	5.19125	5.35492	5.36607	4.84687	5.11708	5.27357	4.96108	5.55947	[R].EGTDKTNHVSKEEAGVPRGEGPAVPGDTPPPTPR.[S]	1xPhospho [T28]; 2xTMTpro [K5; K11]; 1xTMTpro [N-Term]	P60469 [687-720]	P60469 1xPhospho [T714]	1	GPAVPGDtPPPTPR_	Ppfia3
P60469	QAQsPGGVSSEVEVLk.P60469	2	QAQsPGGVSSEVEVLk	0.00579249	6.12634	6.15909	6.34106	6.14968	6.35321	6.46214	6.48469	6.50879	6.45626	6.70094	6.40785	6.54285	6.27514	6.47718	6.52931	6.23125	6.29248	6.29851	6.44343	6.48737	[R].QAQSPGGVSSEVEVLK.[A]	1xPhospho [S4]; 1xTMTpro [K16]; 1xTMTpro [N-Term]	P60469 [139-154]	P60469 1xPhospho [S142]	1	____QAQsPGGVSSE	Ppfia3
P60469	sLPGSALELR.P60469	3	sLPGSALELR	0.0494196	6.48915	6.38451	6.59796	6.89567	6.45596	6.78728	6.82768	6.43783	6.94939	6.92247	6.76246	6.43244	6.72956	6.83729	6.67665	6.99007	6.77674	6.79898	7.0246	6.9646	[R].SLPGSALELR.[Y]	1xPhospho [S1]; 1xTMTpro [N-Term]	P60469 [508-517]	P60469 1xPhospho [S508]	1	_______sLPGSALE	Ppfia3
P60469	RGsALGPDEAGGELER.P60469	7	RGsALGPDEAGGELER	5.29e-05	6.12484	6.43042	6.77065	6.11576	6.44816	7.57884	7.94053	7.47058	8.06295	7.79533	7.00946	6.74746	7.58858	7.42781	7.6337	7.25091	7.11176	6.66879	7.12104	7.00107	[R].RGSALGPDEAGGELER.[L]	1xPhospho [S3]; 1xTMTpro [N-Term]	P60469 [15-30]	P60469 1xPhospho [S17]	1	_____RGsALGPDEA	Ppfia3
P60469	SAAAGALGsPGLPLRk.P60469	8	SAAAGALGsPGLPLRk	0.0362269	6.74277	6.9575	6.9904	7.01505	7.32307	6.83742	6.56235	7.20799	6.66004	6.91073	7.35054	7.32442	7.0028	7.46748	7.12919	6.62803	6.86433	6.80523	7.03625	7.08079	[R].SAAAGALGSPGLPLRK.[L]	1xPhospho [S9]; 1xTMTpro [K16]; 1xTMTpro [N-Term]	P60469 [1156-1171]	P60469 1xPhospho [S1164]	1	AAAGALGsPGLPLRK	Ppfia3
P60469	LAPPsPAR.P60469	NA	LAPPsPAR	0.284356	7.23817	7.24906	7.46255	7.17722	6.51811	7.14004	7.60961	7.94029	7.83795	7.30204	7.23266	6.90728	7.79078	8.08009	7.86712	7.41206	7.30974	7.07932	7.8899	7.76964	[R].LAPPSPAR.[E]	1xPhospho [S5]; 1xTMTpro [N-Term]	P60469 [679-686]	P60469 1xPhospho [S683]	1	___LAPPsPAR____	Ppfia3
P60469	LAPPsPAREGTDk.P60469	7	LAPPsPAREGTDk	0.0199531	6.84318	6.77066	7.15447	6.66322	6.55469	7.17863	7.749	8.06275	7.62771	7.25412	7.03611	6.51664	7.36641	7.70915	7.5407	6.92806	6.76158	6.66423	7.31161	7.07746	[R].LAPPSPAREGTDK.[T]	1xPhospho [S5]; 1xTMTpro [K13]; 1xTMTpro [N-Term]	P60469 [679-691]	P60469 1xPhospho [S683]	1	___LAPPsPAREGTD	Ppfia3
P60469	VSSSGLDsLGRYR.P60469	6	VSSSGLDsLGRYR	0.0282387	6.21199	6.8076	7.15091	6.93899	7.26844	6.7006	5.8771	5.93194	6.36643	7.09299	7.69321	7.96716	6.80292	7.14866	6.96883	6.93875	7.1717	7.37985	6.96228	7.11384	[R].VSSSGLDSLGRYR.[S]	1xPhospho [S8]; 1xTMTpro [N-Term]	P60469 [638-650]	P60469 1xPhospho [S645]	1	VSSSGLDsLGRYR__	Ppfia3
P60761	GGAGGGPsGD.P60761	8	GGAGGGPsGD	0.00536563	4.81198	4.71429	4.7942	5.07142	4.96325	4.65875	4.51632	4.52879	4.83837	5.1267	4.88072	5.42485	5.38659	6.0344	5.69175	4.76955	4.8772	5.21762	4.65414	4.90266	[R].GGAGGGPSGD.[-]	1xPhospho [S8]; 1xTMTpro [N-Term]	P60761 [69-78]	P60761 1xPhospho [S76]	1	GGAGGGPsGD_____	Nrgn
P60840	SsLVTSk.P60840	3	SsLVTSk	0.00332199	6.68356	6.95667	6.83636	6.85202	7.5932	7.46388	7.30417	6.72605	7.66757	7.73501	7.4224	7.89189	7.90106	7.39473	8.24479	8.08942	7.9579	7.73589	7.85097	7.97189	[K].SSLVTSK.[L]	1xPhospho [S2]; 1xTMTpro [K7]; 1xTMTpro [N-Term]	P60840 [108-114]	P60840 1xPhospho [S109]	1	______SsLVTSK__	Ensa
P60840	YFDsGDYNmAk.P60840	NA	YFDsGDYNmAk	0.424587	5.71068	5.62235	5.79351	5.86578	5.73583	5.9767	5.51787	5.78827	6.00007	5.90709	5.55093	6.17106	5.7625	6.08635	5.9508	5.47132	5.6022	6.01096	5.73233	5.72207	[K].YFDSGDYNMAK.[A]	1xPhospho [S4]; 1xOxidation [M9]; 1xTMTpro [K11]; 1xTMTpro [N-Term]	P60840 [64-74]	P60840 1xPhospho [S67]	1	____YFDsGDYNMAK	Ensa
P60853	ALSFsDGGSk.P60853	2	ALSFsDGGSk	0.00180296	5.41451	5.2383	5.59287	5.5321	5.22521	5.41144	5.45903	6.06217	5.30833	5.24004	5.50979	4.3222	5.38058	5.45737	4.5693	4.35943	4.09645	4.21108	4.57197	4.7616	[K].ALSFSDGGSK.[L]	1xPhospho [S5]; 1xTMTpro [K10]; 1xTMTpro [N-Term]	P60853 [229-238]	P60853 1xPhospho [S233]	1	___ALSFsDGGSK__	Lzts1
P61264	DsDDEEEVVHVDR.P61264	6	DsDDEEEVVHVDR	0.000215738	6.24707	6.2646	6.78236	6.623	6.60668	6.00716	5.98288	6.06333	5.98206	6.04302	6.06845	6.56518	6.6123	6.66099	6.60431	7.02059	6.57018	6.81026	6.95205	7.23101	[K].DSDDEEEVVHVDR.[D]	1xPhospho [S2]; 1xTMTpro [N-Term]	P61264 [13-25]	P61264 1xPhospho [S14]	1	______DsDDEEEVV	Stx1b
P61264	SAkDsDDEEEVVHVDR.P61264	6	SAkDsDDEEEVVHVDR	5.62e-06	6.39083	6.93227	6.94032	6.9821	6.54445	6.11499	5.78936	6.33555	6.52671	6.61749	6.65216	7.3978	7.30882	7.20837	7.53552	8.04917	7.93614	7.74769	7.85159	8.05969	[R].SAKDSDDEEEVVHVDR.[D]	1xPhospho [S5]; 1xTMTpro [K3]; 1xTMTpro [N-Term]	P61264 [10-25]	P61264 1xPhospho [S14]	1	___SAKDsDDEEEVV	Stx1b
P61329	VVNQDsT.P61329	3	VVNQDsT	0.000656186	7.68306	7.69424	7.78798	7.49201	7.4059	7.98157	8.05662	8.29098	8.17165	8.05029	7.99462	7.89167	8.76909	8.63987	8.87711	8.6563	8.4613	8.4236	9.31755	9.2497	[K].VVNQDST.[-]	1xPhospho [S6]; 1xTMTpro [N-Term]	P61329 [237-243]	P61329 1xPhospho [S242]	1	__VVNQDsT______	Fgf12
P61979	DYDDmsPR.P61979	1	DYDDmsPR	0.00110978	6.75548	6.24685	7.00454	7.74167	6.83578	6.00211	5.97297	5.42582	5.83838	5.47818	5.97807	5.04933	6.07078	5.4775	6.0137	5.70779	4.88762	5.06725	5.97481	5.74394	[R].DYDDMSPR.[R]	1xPhospho [S6]; 1xOxidation [M5]; 1xTMTpro [N-Term]	P61979 [279-286]	P61979 1xPhospho [S284]	1	__DYDDMsPR_____	Hnrnpk
P62071	kFQEQEcPPsPEPTRk.P62071	7	kFQEQEcPPsPEPTRk	0.00100564	8.03532	7.73603	8.02188	7.72512	8.00243	8.39199	8.83227	8.87485	8.91717	8.79713	8.6743	8.03441	8.77004	8.88763	8.93528	8.52863	8.07746	8.15719	8.70401	8.42748	[R].KFQEQECPPSPEPTRK.[E]	1xCarbamidomethyl [C7]; 1xPhospho [S10]; 2xTMTpro [K1; K16]; 1xTMTpro [N-Term]	P62071 [177-192]	P62071 1xPhospho [S186]	1	QEQECPPsPEPTRK_	Rras2
P62071	FQEQEcPPsPEPTR.P62071	1	FQEQEcPPsPEPTR	0.0010756	6.9607	6.91067	7.27697	7.51546	7.29234	6.91218	6.74308	6.56817	7.02706	7.10892	6.46725	6.69977	6.59317	6.61078	6.6963	6.52101	6.49008	6.70519	6.68225	6.77045	[K].FQEQECPPSPEPTR.[K]	1xCarbamidomethyl [C6]; 1xPhospho [S9]; 1xTMTpro [N-Term]	P62071 [178-191]	P62071 1xPhospho [S186]	1	QEQECPPsPEPTR__	Rras2
P62071	FQEQEcPPsPEPTRk.P62071	7	FQEQEcPPsPEPTRk	0.00546824	6.77104	6.50215	6.71336	6.38732	6.20514	6.84482	7.07905	7.05211	7.27873	7.29761	6.94497	6.6649	7.23279	7.57633	7.48959	6.7476	6.63188	6.66594	6.95565	7.00998	[K].FQEQECPPSPEPTRK.[E]	1xCarbamidomethyl [C6]; 1xPhospho [S9]; 1xTMTpro [K15]; 1xTMTpro [N-Term]	P62071 [178-192]	P62071 1xPhospho [S186]	1	QEQECPPsPEPTRK_	Rras2
P62484	TTPPTQkPPsPPmSGk.P62484	4	TTPPTQkPPsPPmSGk	0.0011111	8.31675	8.24887	8.52067	8.37947	8.41436	8.60576	8.79918	9.09185	9.03031	9.06019	8.82938	8.64756	9.08179	8.96696	9.28425	8.93607	8.95896	8.68051	9.19113	9.22866	[R].TTPPTQKPPSPPMSGK.[G]	1xPhospho [S10]; 1xOxidation [M13]; 2xTMTpro [K7; K16]; 1xTMTpro [N-Term]	P62484 [168-183]	P62484 1xPhospho [S177]	1	PPTQKPPsPPMSGK_	Abi2
P62484	HTPPTIGGsLPYR.P62484	5	HTPPTIGGsLPYR	0.00953349	6.30393	6.41956	6.56992	6.62533	6.77696	6.27486	6.3603	5.81228	6.76486	6.4476	6.26798	5.85679	6.18188	6.08996	6.25312	6.08691	6.04117	5.92618	6.00647	5.88483	[R].HTPPTIGGSLPYR.[R]	1xPhospho [S9]; 1xTMTpro [N-Term]	P62484 [293-305]	P62484 1xPhospho [S301]	1	TPPTIGGsLPYR___	Abi2
P62484	GTLGRHsPYR.P62484	1	GTLGRHsPYR	0.00756194	5.85224	5.43776	5.44925	6.14675	5.84649	5.38113	5.05682	5.42264	5.16982	5.01358	5.13094	3.592	5.64206	5.26027	3.96753	4.53545	3.76911	4.31328	4.76305	4.59445	[K].GTLGRHSPYR.[T]	1xPhospho [S7]; 1xTMTpro [N-Term]	P62484 [184-193]	P62484 1xPhospho [S190]	1	_GTLGRHsPYR____	Abi2
P62996	RPHtPTPGIYmGRPTYGSSR.P62996	1	RPHtPTPGIYmGRPTYGSSR	0.000404465	6.11804	6.26357	6.74751	6.78445	6.87746	5.78538	5.40868	5.37087	5.74891	6.08153	5.73391	5.94641	5.86712	5.92054	5.93872	5.46579	5.69825	5.86678	5.75151	5.93343	[K].RPHTPTPGIYMGRPTYGSSR.[R]	1xPhospho [T4]; 1xOxidation [M11]; 1xTMTpro [N-Term]	P62996 [198-217]	P62996 1xPhospho [T201]	1	____RPHtPTPGIYM	Tra2b
P63085	VADPDHDHTGFLTEyVATR.P63085	6	VADPDHDHTGFLTEyVATR	0.0202663	5.94821	6.15692	6.40072	5.8909	6.28944	5.91793	5.52045	5.58357	5.75935	5.96278	5.77639	6.2035	6.37221	5.97709	6.20129	6.07898	6.00208	6.18228	6.35675	6.41512	[R].VADPDHDHTGFLTEYVATR.[W]	1xPhospho [Y15]; 1xTMTpro [N-Term]	P63085 [171-189]	P63085 1xPhospho [Y185]	1	HTGFLTEyVATR___	Mapk1
P63101	VVsSIEQk.P63101	6	VVsSIEQk	0.0652668	4.2208	4.13867	3.54504	3.44643	3.90906	3.1135	3.4601	3.26511	3.52069	3.22742	2.98919	3.42995	3.20057	3.40687	3.83516	3.22771	3.297	3.86816	4.0508	3.92895	[R].VVSSIEQK.[T]	1xPhospho [S3]; 1xTMTpro [K8]; 1xTMTpro [N-Term]	P63101 [61-68]	P63101 1xPhospho [S63]	1	_____VVsSIEQK__	Ywhaz
P63213	EDPLLtPVPASENPFR.P63213	6	EDPLLtPVPASENPFR	0.0128879	3.44685	2.93824	3.57112	3.18707	3.71993	2.99667	2.58294	2.57496	3.05829	2.82591	2.74074	2.65663	2.99028	2.46526	2.65729	2.41007	2.7334	2.98793	3.18066	3.28183	[K].EDPLLTPVPASENPFR.[E]	1xPhospho [T6]; 1xTMTpro [N-Term]	P63213 [47-62]	P63213 1xPhospho [T52]	1	__EDPLLtPVPASEN	Gng2
P63216	mkGEtPVNSTmSIGQAR.P63216	1	mkGEtPVNSTmSIGQAR	1.09e-05	6.4097	6.46553	6.54016	7.03685	7.13148	5.24191	5.11351	4.85761	5.56991	5.76896	5.59485	5.68937	5.56713	5.58961	5.68101	5.16957	5.49794	5.31147	5.73127	5.54879	[-].MKGETPVNSTMSIGQAR.[K]	1xPhospho [T5]; 2xOxidation [M1; M11]; 1xTMTpro [K2]; 1xTMTpro [N-Term]	P63216 [1-17]	P63216 1xPhospho [T5]	1	___MKGEtPVNSTMS	Gng3
P63318	mGPSSSPIPSPSPsPTDSk.P63318	3	mGPSSSPIPSPSPsPTDSk	0.00180366	5.66315	5.66336	5.73034	5.72062	5.61786	5.77234	5.94043	5.9183	6.28901	6.19295	5.80423	6.28597	6.12834	6.3744	6.51345	6.2841	6.08918	6.20914	6.2287	6.57909	[R].MGPSSSPIPSPSPSPTDSK.[R]	1xPhospho [S14]; 1xOxidation [M1]; 1xTMTpro [K19]; 1xTMTpro [N-Term]	P63318 [317-335]	P63318 1xPhospho [S330]	1	PIPSPSPsPTDSK__	Prkcg
P63318	RGsDELYAIk.P63318	3	RGsDELYAIk	7.58e-06	6.33132	6.25489	6.16963	5.85564	6.34004	6.47243	6.6977	6.98578	6.93283	7.04299	7.18489	7.32648	7.50615	7.54034	7.85223	8.23926	7.59358	7.56238	8.3271	8.89903	[R].RGSDELYAIK.[I]	1xPhospho [S3]; 1xTMTpro [K10]; 1xTMTpro [N-Term]	P63318 [371-380]	P63318 1xPhospho [S373]	1	_____RGsDELYAIK	Prkcg
P63318	SVPsLcGVDHTER.P63318	1	SVPsLcGVDHTER	0.00525628	5.619	5.72991	6.81902	7.22802	7.19904	5.36119	5.52959	5.35966	5.7193	5.88378	5.5303	5.75278	5.02037	4.9532	5.30703	5.44032	5.57477	5.6285	4.80518	5.1538	[R].SVPSLCGVDHTER.[R]	1xCarbamidomethyl [C6]; 1xPhospho [S4]; 1xTMTpro [N-Term]	P63318 [145-157]	P63318 1xPhospho [S148]	1	____SVPsLCGVDHT	Prkcg
P63318	AAPALtPPDR.P63318	4	AAPALtPPDR	0.000466085	7.25603	7.18175	8.4337	8.20702	8.36899	8.71741	9.33217	10.0864	9.08531	8.93775	9.22821	9.04936	9.35398	9.37224	9.63724	9.43653	9.34739	8.94223	9.38823	9.25802	[R].AAPALTPPDR.[L]	1xPhospho [T6]; 1xTMTpro [N-Term]	P63318 [650-659]	P63318 1xPhospho [T655]	1	__AAPALtPPDR___	Prkcg
P63328	ITsFEEAk.P63328	3	ITsFEEAk	3.09e-07	5.18465	4.86177	5.18039	4.79836	5.07319	5.73884	5.81505	6.21342	5.83752	5.67363	6.29131	6.56207	7.67113	7.2532	7.76073	8.26388	8.04886	7.63573	8.9393	8.4838	[K].ITSFEEAK.[G]	1xPhospho [S3]; 1xTMTpro [K8]; 1xTMTpro [N-Term]	P63328 [467-474]	P63328 1xPhospho [S469]	1	_____ITsFEEAK__	Ppp3ca
P63328	ITsFEEAkGLDR.P63328	3	ITsFEEAkGLDR	4.29e-09	6.58463	6.64588	6.82226	6.42859	6.69656	6.84706	6.64371	6.58448	7.08412	7.32491	7.86493	8.2876	8.64275	8.3306	8.44274	9.33513	9.26761	9.19079	9.56241	9.7863	[K].ITSFEEAKGLDR.[I]	1xPhospho [S3]; 1xTMTpro [K8]; 1xTMTpro [N-Term]	P63328 [467-478]	P63328 1xPhospho [S469]	1	_____ITsFEEAKGL	Ppp3ca
P63328	QTLQSATVEAIEADEAIkGFsPQHk.P63328	3	QTLQSATVEAIEADEAIkGFsPQHk	5.52e-07	4.72597	4.52399	4.85647	4.37294	4.93527	5.28483	5.28921	5.49874	5.22675	5.4409	6.16759	5.87286	6.93761	6.47266	6.82497	6.75721	6.35651	6.3421	6.92635	7.02237	[K].QTLQSATVEAIEADEAIKGFSPQHK.[I]	1xPhospho [S21]; 2xTMTpro [K18; K25]; 1xTMTpro [N-Term]	P63328 [442-466]	P63328 1xPhospho [S462]	1	DEAIKGFsPQHK___	Ppp3ca
P63328	GFsPQHk.P63328	4	GFsPQHk	0.00168154	7.65013	7.13225	7.76962	7.78186	7.40344	7.64702	8.21782	8.31701	7.83219	7.80073	8.23373	7.75939	9.23457	8.64784	9.17544	9.36361	8.39437	8.41837	9.23301	8.97096	[K].GFSPQHK.[I]	1xPhospho [S3]; 1xTMTpro [K7]; 1xTMTpro [N-Term]	P63328 [460-466]	P63328 1xPhospho [S462]	1	_____GFsPQHK___	Ppp3ca
P68404	LIPDPksESk.P68404	4	LIPDPksESk	0.000101531	5.45872	5.39226	5.58709	4.94416	5.82385	5.80211	6.28757	7.07888	6.2502	6.28905	6.31853	6.44141	7.12689	6.97982	7.49426	7.31435	7.08078	6.6789	7.5341	7.46216	[K].LIPDPKSESK.[Q]	1xPhospho [S7]; 2xTMTpro [K6; K10]; 1xTMTpro [N-Term]	P68404 [200-209]	P68404 1xPhospho [S206]	1	_LIPDPKsESK____	Prkcb
P68404	QPVELtPTDk.P68404	4	QPVELtPTDk	9.17e-05	4.93357	5.26849	5.44418	5.44682	5.22186	5.34398	5.67792	6.21679	5.71232	5.40367	5.62857	6.27966	6.84191	6.4058	7.04169	7.19646	6.85275	6.34186	7.42628	6.91055	[R].QPVELTPTDK.[L]	1xPhospho [T6]; 1xTMTpro [K10]; 1xTMTpro [N-Term]	P68404 [637-646]	P68404 1xPhospho [T642]	1	__QPVELtPTDK___	Prkcb
P70175	GVTSNTsDSESSSk.P70175	2	GVTSNTsDSESSSk	0.00291331	4.70484	4.72743	4.85406	4.51811	4.73332	4.65601	5.52023	5.36936	5.5593	4.94535	4.11781	4.05309	5.07926	4.70824	4.67002	3.82967	4.32579	4.0643	4.27529	4.50211	[K].GVTSNTSDSESSSK.[G]	1xPhospho [S7]; 1xTMTpro [K14]; 1xTMTpro [N-Term]	P70175 [626-639]	P70175 1xPhospho [S632]	1	_GVTSNTsDSESSSK	Dlg3
P70188	RDsLPGkEk.P70188	5	RDsLPGkEk	0.0628795	6.34312	6.01064	6.31477	6.37598	5.84009	6.4449	6.48586	5.96086	6.48743	6.50416	5.78399	5.64947	6.02904	5.96764	6.36718	6.16448	5.76552	5.68287	6.26509	5.86747	[R].RDSLPGKEK.[K]	1xPhospho [S3]; 2xTMTpro [K7; K9]; 1xTMTpro [N-Term]	P70188 [100-108]	P70188 1xPhospho [S102]	1	_____RDsLPGKEK_	Kifap3
P70188	LksLNANTDITSLAR.P70188	NA	LksLNANTDITSLAR	0.32005	6.58493	6.66835	6.82634	6.73168	7.01513	6.91046	6.68797	6.5705	6.72738	6.98189	6.72403	6.94863	7.07524	6.75826	7.19381	6.76141	6.89317	6.80147	7.12699	6.95266	[R].LKSLNANTDITSLAR.[K]	1xPhospho [S3]; 1xTMTpro [K2]; 1xTMTpro [N-Term]	P70188 [58-72]	P70188 1xPhospho [S60]	1	_____LKsLNANTDI	Kifap3
P70188	RDsLPGk.P70188	5	RDsLPGk	0.0757172	5.87185	5.39994	5.60355	5.64839	5.69006	6.15069	6.58429	5.95093	6.14275	5.82396	5.25565	4.7171	5.87196	5.607	6.09663	5.65822	5.77613	5.04197	5.82382	5.69706	[R].RDSLPGK.[E]	1xPhospho [S3]; 1xTMTpro [K7]; 1xTMTpro [N-Term]	P70188 [100-106]	P70188 1xPhospho [S102]	1	_____RDsLPGK___	Kifap3
P70206	TASsPDSLR.P70206	8	TASsPDSLR	0.023735	6.63084	6.88106	7.11862	6.80132	6.84093	6.76024	6.67469	7.0121	7.08851	7.07276	7.18152	6.9558	7.18336	7.25331	7.12525	6.5948	6.71754	6.74249	7.0065	6.83068	[R].TASSPDSLR.[S]	1xPhospho [S4]; 1xTMTpro [N-Term]	P70206 [1627-1635]	P70206 1xPhospho [S1630]	1	____TASsPDSLR__	Plxna1
P70265	RNsFTPLSSSNTIR.P70265	1	RNsFTPLSSSNTIR	0.00087894	6.38804	6.29849	6.77661	7.0308	6.76203	6.21575	6.18627	5.87502	6.20138	6.33292	6.12787	6.05673	5.96741	6.10525	6.05838	6.10732	5.88056	5.98992	5.91141	6.25783	[R].RNSFTPLSSSNTIR.[R]	1xPhospho [S3]; 1xTMTpro [N-Term]	P70265 [467-480]	P70265 1xPhospho [S469]	1	_____RNsFTPLSSS	Pfkfb2
P70398	AQENYEGGEEVsPPQTk.P70398	4	AQENYEGGEEVsPPQTk	0.0467431	5.69877	5.81361	5.75531	5.47049	5.96516	5.75532	5.96095	6.36367	6.30802	5.88918	5.82871	5.97709	6.3486	6.44092	6.41773	6.08839	5.97695	5.94582	6.43316	6.47881	[R].AQENYEGGEEVSPPQTK.[G]	1xPhospho [S12]; 1xTMTpro [K17]; 1xTMTpro [N-Term]	P70398 [2536-2552]	P70398 1xPhospho [S2547]	1	YEGGEEVsPPQTK__	Usp9x
P70399	kLPTSEEERsPAkR.P70399	NA	kLPTSEEERsPAkR	0.706146	7.05998	6.826	6.7635	6.73718	6.85355	6.67378	6.53822	6.3533	6.66647	6.4198	6.23323	5.83542	6.85258	7.05942	7.16479	6.36275	6.33279	6.15049	7.44039	7.24439	[R].KLPTSEEERSPAKR.[G]	1xPhospho [S10]; 2xTMTpro [K1; K13]; 1xTMTpro [N-Term]	P70399 [1666-1679]	P70399 1xPhospho [S1675]	1	PTSEEERsPAKR___	Tp53bp1
P70429	QEsLERR.P70429	2	QEsLERR	0.0115277	7.11273	6.95629	7.29816	7.46366	7.02579	7.12578	7.73246	7.83403	7.57911	7.40492	6.74084	6.58538	7.32562	7.41405	7.29437	6.78523	6.81227	6.64808	7.12663	6.75314	[R].QESLERR.[I]	1xPhospho [S3]; 1xTMTpro [N-Term]	P70429 [148-154]	P70429 1xPhospho [S150]	1	_____QEsLERR___	Evl
P70429	QVmEQQHRQEsLER.P70429	5	QVmEQQHRQEsLER	0.0302843	4.512	4.07226	4.35607	4.66192	4.91736	4.69361	4.84241	3.76755	4.49774	4.92623	3.77078	4.20208	4.46706	5.0176	3.93324	3.73554	3.86685	4.03622	3.66541	3.51432	[R].QVMEQQHRQESLER.[R]	1xPhospho [S11]; 1xOxidation [M3]; 1xTMTpro [N-Term]	P70429 [140-153]	P70429 1xPhospho [S150]	1	EQQHRQEsLER____	Evl
P70429	SNsVEkPVSSLLSR.P70429	2	SNsVEkPVSSLLSR	5.25e-08	8.82391	8.88181	8.91204	9.05373	8.99178	8.9352	8.94962	8.67109	9.07296	9.11874	8.51068	8.47393	8.61909	8.57476	8.49899	7.78831	7.88113	7.99915	8.0343	8.0911	[R].SNSVEKPVSSLLSR.[T]	1xPhospho [S3]; 1xTMTpro [K6]; 1xTMTpro [N-Term]	P70429 [327-340]	P70429 1xPhospho [S329]	1	_____SNsVEKPVSS	Evl
P70677	TIHGSksVDSGIYLDSSYk.P70677	5	TIHGSksVDSGIYLDSSYk	1.09e-07	7.55236	7.46571	7.97121	7.56299	7.67604	7.28819	7.46334	7.263	7.78663	7.82753	6.69895	6.46105	6.5977	6.77083	6.6318	6.28728	6.39191	6.39893	6.24411	6.15429	[K].TIHGSKSVDSGIYLDSSYK.[M]	1xPhospho [S7]; 2xTMTpro [K6; K19]; 1xTMTpro [N-Term]	P70677 [20-38]	P70677 1xPhospho [S26]	1	_TIHGSKsVDSGIYL	Casp3
P70698	GcRLsPR.P70698	2	GcRLsPR	8.9e-05	6.21489	5.96833	6.56299	6.57399	6.3495	6.06543	6.57057	6.37937	6.45432	6.48092	5.80438	5.70897	6.13258	6.14947	6.10117	5.64554	5.37981	5.69877	5.5031	5.58731	[K].GCRLSPR.[D]	1xCarbamidomethyl [C2]; 1xPhospho [S5]; 1xTMTpro [N-Term]	P70698 [558-564]	P70698 1xPhospho [S562]	1	___GCRLsPR_____	Ctps1
P70704	TVsEIR.P70704	3	TVsEIR	1.62e-05	6.80056	7.07233	7.34005	7.21782	6.97603	6.96543	7.10751	6.8645	7.42607	7.35582	7.60098	7.39782	7.51782	7.61027	7.92307	8.11149	7.98655	7.87777	8.19846	7.99331	[RK].TVSEIR.[SG]	1xPhospho [S3]; 1xTMTpro [N-Term]	P70704 [7-12]	P70704 1xPhospho [S9]	1	_____TVsEIR____	Atp8a1
P70704	RTVsEIR.P70704	3	RTVsEIR	0.000347951	6.27328	6.29474	6.73336	6.76682	6.63465	6.4104	6.30417	6.01204	6.69186	6.67882	6.76669	6.86814	6.68057	6.74351	6.88391	7.33659	7.06412	7.05742	7.4128	7.12527	[R].RTVSEIR.[S]	1xPhospho [S4]; 1xTMTpro [N-Term]	P70704 [6-12]	P70704 1xPhospho [S9]	1	____RTVsEIR____	Atp8a1
P81122	VAsPTSGLkR.P81122	5	VAsPTSGLkR	0.00014694	7.8364	7.95763	7.86802	7.92719	8.20764	8.10357	7.75285	7.4704	8.04992	8.19168	7.71074	7.6705	7.72792	7.41136	7.24695	6.8937	6.87616	6.90774	7.30785	7.32302	[R].VASPTSGLKR.[L]	1xPhospho [S3]; 1xTMTpro [K9]; 1xTMTpro [N-Term]	P81122 [1087-1096]	P81122 1xPhospho [S1089]	1	_____VAsPTSGLKR	Irs2
P81122	RVsGDGAQDLDR.P81122	5	RVsGDGAQDLDR	0.0119135	6.27266	6.5437	6.61662	6.53641	6.87642	6.65856	6.34134	5.99054	6.74956	6.67725	6.36435	6.23211	6.45385	6.44086	6.29787	5.72415	5.70815	5.98086	6.13834	6.35787	[R].RVSGDGAQDLDR.[G]	1xPhospho [S3]; 1xTMTpro [N-Term]	P81122 [554-565]	P81122 1xPhospho [S556]	1	_____RVsGDGAQDL	Irs2
P81122	VAsPTSGLk.P81122	5	VAsPTSGLk	6.69e-06	5.89762	5.74278	5.62701	5.67423	5.87065	5.74667	5.71689	5.57215	6.02462	5.8551	5.21791	5.31198	5.48243	5.23499	5.11774	4.31893	4.64248	4.63899	5.19293	4.8515	[R].VASPTSGLK.[R]	1xPhospho [S3]; 1xTMTpro [K9]; 1xTMTpro [N-Term]	P81122 [1087-1095]	P81122 1xPhospho [S1089]	1	_____VAsPTSGLK_	Irs2
P83510	LGSQPIRAsNPDLR.P83510	1	LGSQPIRAsNPDLR	0.0150794	7.93337	8.03774	8.23942	8.09576	8.2801	7.63306	7.48666	7.38087	7.76611	8.12823	8.03235	7.79571	7.53471	7.63853	7.83459	7.78441	7.72641	7.54064	7.81876	7.65423	[R].LGSQPIRASNPDLR.[R]	1xPhospho [S9]; 1xTMTpro [N-Term]	P83510 [670-683]	P83510 1xPhospho [S678]	1	GSQPIRAsNPDLR__	Tnik
P83510	SEGsPVLPHEPSk.P83510	3	SEGsPVLPHEPSk	0.00870543	6.67728	6.4681	7.21739	7.10026	6.94723	6.80098	7.27385	7.69636	7.03217	7.20615	7.13005	7.80532	7.56574	7.36187	7.57911	7.999	7.86955	7.32743	7.44096	7.53948	[K].SEGSPVLPHEPSK.[V]	1xPhospho [S4]; 1xTMTpro [K13]; 1xTMTpro [N-Term]	P83510 [737-749]	P83510 1xPhospho [S740]	1	____SEGsPVLPHEP	Tnik
P83510	VEmPRQNsDPTSENPPLPTR.P83510	5	VEmPRQNsDPTSENPPLPTR	0.988107	6.21345	6.18885	6.73677	6.6877	6.81007	6.77649	6.33587	5.83362	6.46215	7.28253	6.71087	6.44446	6.47702	6.56787	6.52894	6.68593	6.64499	6.43953	6.07282	6.53646	[R].VEMPRQNSDPTSENPPLPTR.[I]	1xPhospho [S8]; 1xOxidation [M3]; 1xTMTpro [N-Term]	P83510 [604-623]	P83510 1xPhospho [S611]	1	VEMPRQNsDPTSENP	Tnik
P83510	QNsDPTSENPPLPTR.P83510	7	QNsDPTSENPPLPTR	0.00251454	7.80047	7.43789	7.5198	7.39877	7.34766	7.94421	8.30924	8.43425	8.4392	8.31495	8.00256	7.64753	8.40283	8.40712	8.57637	7.75709	7.99785	7.66488	8.27077	8.20923	[R].QNSDPTSENPPLPTR.[I]	1xPhospho [S3]; 1xTMTpro [N-Term]	P83510 [609-623]	P83510 1xPhospho [S611]	1	_____QNsDPTSENP	Tnik
P83510	LGSQPIRAsNPDLRR.P83510	1	LGSQPIRAsNPDLRR	0.00440025	7.69505	7.68658	8.0147	7.9666	8.32384	7.33755	7.08063	7.08783	7.37756	7.75763	7.71331	7.5566	7.31648	7.42356	7.49952	7.63861	7.52623	7.51332	7.68863	7.55512	[R].LGSQPIRASNPDLRR.[T]	1xPhospho [S9]; 1xTMTpro [N-Term]	P83510 [670-684]	P83510 1xPhospho [S678]	1	GSQPIRAsNPDLRR_	Tnik
P83510	QNsDPTSENPPLPTRIEk.P83510	5	QNsDPTSENPPLPTRIEk	0.0530329	8.35679	8.26139	8.43201	8.51818	8.48211	8.58534	8.37313	7.90465	8.27836	8.56337	8.31597	7.96136	8.20628	8.14105	8.14112	8.1476	8.17547	7.95738	8.02533	8.2552	[R].QNSDPTSENPPLPTRIEK.[F]	1xPhospho [S3]; 1xTMTpro [K18]; 1xTMTpro [N-Term]	P83510 [609-626]	P83510 1xPhospho [S611]	1	_____QNsDPTSENP	Tnik
P83510	TTSIsPALAR.P83510	2	TTSIsPALAR	0.0691868	9.11699	9.0617	9.00537	8.9954	8.96205	9.10129	9.09289	9.18442	9.28979	9.51007	9.34699	8.45636	8.95684	9.23579	8.51312	8.48592	8.47407	8.59163	9.05733	9.03941	[R].TTSISPALAR.[K]	1xPhospho [S5]; 1xTMTpro [N-Term]	P83510 [647-656]	P83510 1xPhospho [S651]	1	___TTSIsPALAR__	Tnik
P83510	kNsPGNGSALGPR.P83510	1	kNsPGNGSALGPR	0.0013497	6.72123	6.52995	6.24888	6.56549	6.34666	6.05016	5.73745	5.65556	5.97176	6.02228	5.94638	5.86213	6.09156	5.99287	6.2944	5.54358	5.36826	5.66027	6.07306	6.09487	[R].KNSPGNGSALGPR.[L]	1xPhospho [S3]; 1xTMTpro [K1]; 1xTMTpro [N-Term]	P83510 [657-669]	P83510 1xPhospho [S659]	1	_____KNsPGNGSAL	Tnik
P84091	QQVRsPVTNIAR.P84091	3	QQVRsPVTNIAR	5.32e-05	5.68326	6.00022	5.97391	5.85781	5.84229	6.07967	5.86505	5.96264	6.4271	6.29656	6.25083	6.33377	6.56771	6.67445	6.70954	6.57876	6.59929	6.91646	7.11524	7.20001	[R].QQVRSPVTNIAR.[T]	1xPhospho [S5]; 1xTMTpro [N-Term]	P84091 [41-52]	P84091 1xPhospho [S45]	1	___QQVRsPVTNIAR	Ap2m1
P84104	RRsPPPR.P84104	6	RRsPPPR	0.0244951	6.38595	6.45338	6.32446	6.80093	6.99514	5.45981	5.25977	4.71911	5.27131	5.85011	5.47413	5.76086	5.57551	6.5324	6.35865	5.6804	5.1657	6.54768	6.31323	4.28873	[R].RRSPPPR.[R]	1xPhospho [S3]; 1xTMTpro [N-Term]	P84104 [106-112]	P84104 1xPhospho [S108]	1	_____RRsPPPR___	Srsf3
P97379	SAtPPPAEPASLPQEPPk.P97379	6	SAtPPPAEPASLPQEPPk	0.0407279	6.01848	6.10154	6.37464	6.41048	5.93752	5.58055	5.64825	5.80042	5.98076	5.68998	5.34117	5.58657	6.21742	5.93717	6.07434	5.52812	5.72754	5.78183	5.91621	5.6763	[K].SATPPPAEPASLPQEPPK.[A]	1xPhospho [T3]; 1xTMTpro [K18]; 1xTMTpro [N-Term]	P97379 [225-242]	P97379 1xPhospho [T227]	1	_____SAtPPPAEPA	G3bp2
P97379	HLEELEEkSAtPPPAEPASLPQEPPk.P97379	NA	HLEELEEkSAtPPPAEPASLPQEPPk	0.461761	5.92307	5.53387	6.27261	6.01119	6.05552	6.00751	6.16171	6.39532	5.92935	5.9402	5.67461	5.16833	6.12462	5.84594	6.14627	6.07154	5.74787	5.4597	6.02488	6.00353	[K].HLEELEEKSATPPPAEPASLPQEPPK.[A]	1xPhospho [T11]; 2xTMTpro [K8; K26]; 1xTMTpro [N-Term]	P97379 [217-242]	P97379 1xPhospho [T227]	1	ELEEKSAtPPPAEPA	G3bp2
P97393	HNLDVVsPVPINk.P97393	2	HNLDVVsPVPINk	0.023735	5.38996	5.25252	5.43427	5.70348	5.30331	5.35179	5.61172	5.77055	6.10511	5.66665	4.90506	4.93873	5.25786	5.41512	5.48093	4.9897	5.21984	5.16943	5.56327	5.28539	[K].HNLDVVSPVPINK.[D]	1xPhospho [S7]; 1xTMTpro [K13]; 1xTMTpro [N-Term]	P97393 [759-771]	P97393 1xPhospho [S765]	1	_HNLDVVsPVPINK_	Arhgap5
P97393	ESTHQSEDVFLPsPR.P97393	NA	ESTHQSEDVFLPsPR	0.672492	6.38227	6.1881	6.48142	6.41824	6.65923	6.22129	6.3261	6.27477	6.58854	6.43762	6.19149	6.24343	6.43084	6.29903	6.41146	6.31976	6.26298	6.3189	6.49493	6.50038	[R].ESTHQSEDVFLPSPR.[D]	1xPhospho [S13]; 1xTMTpro [N-Term]	P97393 [956-970]	P97393 1xPhospho [S968]	1	SEDVFLPsPR_____	Arhgap5
P97427	sIPHITSDR.P97427	4	sIPHITSDR	0.00311083	4.22349	3.56061	4.09552	4.49421	3.97861	4.173	4.69273	4.43588	4.25428	4.21636	4.50032	4.23495	5.11383	5.08059	5.17789	5.69716	4.71505	4.67316	5.44853	5.15238	[K].SIPHITSDR.[L]	1xPhospho [S1]; 1xTMTpro [N-Term]	P97427 [8-16]	P97427 1xPhospho [S8]	1	_______sIPHITSD	Crmp1
P97434	QVPIAPLHLsLEDR.P97434	NA	QVPIAPLHLsLEDR	0.394464	3.63218	3.23489	3.44452	4.006	2.55041	2.8901	2.98677	3.28872	3.55972	3.18307	3.09991	3.67044	3.88652	3.54707	3.73786	3.17973	3.39738	3.28374	3.36866	3.67013	[K].QVPIAPLHLSLEDR.[S]	1xPhospho [S10]; 1xTMTpro [N-Term]	P97434 [652-665]	P97434 1xPhospho [S661]	1	PIAPLHLsLEDR___	Mprip
P97434	VESGYFsLEk.P97434	NA	VESGYFsLEk	0.331442	3.53642	3.93581	4.07105	4.0729	4.12341	3.61149	3.90007	4.36183	4.01117	3.75553	3.92864	3.75574	4.25006	4.12281	4.40695	4.29629	4.3388	3.75538	4.51737	4.20921	[R].VESGYFSLEK.[A]	1xPhospho [S7]; 1xTMTpro [K10]; 1xTMTpro [N-Term]	P97434 [264-273]	P97434 1xPhospho [S270]	1	_VESGYFsLEK____	Mprip
P97434	SksNPDFLk.P97434	NA	SksNPDFLk	0.260792	6.67789	6.50761	6.54831	6.69254	6.78268	6.62426	6.70299	7.13067	6.89717	6.90557	6.82917	6.57847	7.01102	7.09592	6.93605	6.734	6.73062	6.42714	6.88513	7.09137	[K].SKSNPDFLK.[K]	1xPhospho [S3]; 2xTMTpro [K2; K9]; 1xTMTpro [N-Term]	P97434 [990-998]	P97434 1xPhospho [S992]	1	_____SKsNPDFLK_	Mprip
P97445	EPPGGAHDPAPRsPR.P97445	6	EPPGGAHDPAPRsPR	0.000794573	3.31678	3.14998	3.55929	3.57008	3.66703	2.68421	2.93808	3.1516	2.83203	3.27207	3.06721	3.2711	3.56307	4.21184	3.73027	4.17808	3.89924	3.8383	4.37118	4.00964	[R].EPPGGAHDPAPRSPR.[T]	1xPhospho [S13]; 1xTMTpro [N-Term]	P97445 [2306-2320]	P97445 1xPhospho [S2318]	1	AHDPAPRsPR_____	Cacna1a
P97445	RAWPGsPERAPGR.P97445	6	RAWPGsPERAPGR	0.00846708	3.43167	3.89377	3.45935	3.6392	4.16077	3.72808	2.80321	3.13449	3.61827	4.06433	3.96892	4.22508	4.46889	4.43836	4.22672	3.96881	3.97543	4.22169	4.30856	4.77947	[R].RAWPGSPERAPGR.[E]	1xPhospho [S6]; 1xTMTpro [N-Term]	P97445 [862-874]	P97445 1xPhospho [S867]	1	__RAWPGsPERAPGR	Cacna1a
P97445	EVAEVsPLSAANmSIAVk.P97445	8	EVAEVsPLSAANmSIAVk	0.741268	3.57233	3.73882	4.15584	4.21221	4.27277	3.30295	3.76138	3.80938	4.16181	4.21522	3.80108	3.92126	4.1231	3.99888	4.01397	4.20528	4.35401	3.99382	3.67809	4.01291	[K].EVAEVSPLSAANMSIAVK.[E]	1xPhospho [S6]; 1xOxidation [M13]; 1xTMTpro [K18]; 1xTMTpro [N-Term]	P97445 [747-764]	P97445 1xPhospho [S752]	1	__EVAEVsPLSAANM	Cacna1a
P97445	EEQNRtPLmFQR.P97445	6	EEQNRtPLmFQR	0.0587777	5.40789	5.48598	5.61807	6.1669	5.99054	5.3661	5.58976	5.91979	5.95908	6.05501	5.74201	5.80267	6.03658	6.02339	6.29561	6.11983	6.14148	6.06231	6.23855	6.37513	[R].EEQNRTPLMFQR.[M]	1xPhospho [T6]; 1xOxidation [M9]; 1xTMTpro [N-Term]	P97445 [1930-1941]	P97445 1xPhospho [T1935]	1	__EEQNRtPLMFQR_	Cacna1a
P97445	ESPsWVTQR.P97445	3	ESPsWVTQR	1.41e-05	7.18377	7.14984	7.48787	7.29484	7.45525	7.44197	7.54675	7.87253	7.89603	7.65914	8.00216	7.83546	8.60103	8.64583	8.58307	8.74109	8.37153	8.44232	9.0808	8.72525	[K].ESPSWVTQR.[A]	1xPhospho [S4]; 1xTMTpro [N-Term]	P97445 [1978-1986]	P97445 1xPhospho [S1981]	1	____ESPsWVTQR__	Cacna1a
P97445	GADYTEPDsPREPPGGAHDPAPR.P97445	6	GADYTEPDsPREPPGGAHDPAPR	0.000432756	5.46166	5.76646	5.60726	5.96592	5.85648	5.17227	4.67437	4.66502	4.94486	5.33186	5.29607	5.73007	5.52451	5.75422	5.90515	5.55671	5.72107	5.90746	5.667	5.579	[R].GADYTEPDSPREPPGGAHDPAPR.[S]	1xPhospho [S9]; 1xTMTpro [N-Term]	P97445 [2295-2317]	P97445 1xPhospho [S2303]	1	ADYTEPDsPREPPGG	Cacna1a
P97445	TGTWsPERGPPIDmPNSQPNSQSVEmR.P97445	NA	TGTWsPERGPPIDmPNSQPNSQSVEmR	0.165047	3.81274	4.64655	4.55189	4.47717	4.62053	4.32171	4.10606	4.06338	4.43429	4.42756	4.33964	4.60322	4.64995	4.47509	4.87874	4.28078	4.61558	4.91405	4.74171	4.54362	[K].TGTWSPERGPPIDMPNSQPNSQSVEMR.[E]	1xPhospho [S5]; 2xOxidation [M14; M26]; 1xTMTpro [N-Term]	P97445 [1994-2020]	P97445 1xPhospho [S1998]	1	___TGTWsPERGPPI	Cacna1a
P97445	AAGcAsPR.P97445	3	AAGcAsPR	3.33e-07	5.35594	5.54817	5.86958	5.78334	5.74508	5.87292	5.56508	6.24065	6.10964	6.26608	7.05385	6.71668	7.1506	7.53309	7.02829	7.48704	7.20649	7.4367	7.89301	7.86709	[R].AAGCASPR.[H]	1xCarbamidomethyl [C4]; 1xPhospho [S6]; 1xTMTpro [N-Term]	P97445 [2324-2331]	P97445 1xPhospho [S2329]	1	__AAGCAsPR_____	Cacna1a
P97445	mAGPAAPPGGsPR.P97445	6	mAGPAAPPGGsPR	0.0575633	5.38783	5.36859	6.88876	7.29873	6.90262	5.82577	5.70378	6.2775	6.27606	6.48742	6.91767	6.79704	6.39017	6.72999	6.6265	7.26391	7.00622	7.2995	6.88068	6.97607	[R].MAGPAAPPGGSPR.[G]	1xPhospho [S11]; 1xOxidation [M1]; 1xTMTpro [N-Term]	P97445 [2263-2275]	P97445 1xPhospho [S2273]	1	PAAPPGGsPR_____	Cacna1a
P97445	WSRsPSEGR.P97445	3	WSRsPSEGR	0.000238737	4.85154	5.21734	4.59772	4.66244	4.92998	5.13712	5.50378	6.46895	5.82335	5.61156	5.91192	5.63759	6.60593	6.93888	6.98805	6.54838	6.2527	6.17666	7.10371	7.00925	[R].WSRSPSEGR.[E]	1xPhospho [S4]; 1xTMTpro [N-Term]	P97445 [2197-2205]	P97445 1xPhospho [S2200]	1	____WSRsPSEGR__	Cacna1a
P97445	AWPGsPERAPGR.P97445	3	AWPGsPERAPGR	0.000456404	6.4683	6.32341	7.2975	6.99848	7.02045	6.73722	6.83592	7.24168	7.32178	7.3888	7.51711	7.30163	7.76281	7.63992	7.89167	7.91802	7.73658	7.73	7.80529	7.79464	[R].AWPGSPERAPGR.[E]	1xPhospho [S5]; 1xTMTpro [N-Term]	P97445 [863-874]	P97445 1xPhospho [S867]	1	___AWPGsPERAPGR	Cacna1a
P97445	AWPGsPER.P97445	6	AWPGsPER	0.000160284	5.84016	5.77916	6.53084	6.4325	6.71557	5.78621	5.68374	5.87651	6.06752	6.24086	6.57941	6.45033	6.58689	6.5573	6.6512	7.58137	6.92774	7.14324	6.95098	6.95258	[R].AWPGSPER.[A]	1xPhospho [S5]; 1xTMTpro [N-Term]	P97445 [863-870]	P97445 1xPhospho [S867]	1	___AWPGsPER____	Cacna1a
P97445	kQNLLAsREALYGDAAER.P97445	6	kQNLLAsREALYGDAAER	0.00396479	6.04228	6.23688	6.99583	7.20826	7.16959	6.59753	6.50181	6.73274	6.81863	6.84603	7.24688	6.86468	7.23094	7.39215	7.4183	7.69936	7.46391	7.48373	7.59552	7.27548	[R].KQNLLASREALYGDAAER.[W]	1xPhospho [S7]; 1xTMTpro [K1]; 1xTMTpro [N-Term]	P97445 [786-803]	P97445 1xPhospho [S792]	1	_KQNLLAsREALYGD	Cacna1a
P97792	APQsPTLAPAk.P97792	2	APQsPTLAPAk	7.36e-05	8.08293	7.96953	8.42107	8.30495	7.76291	7.93372	8.29941	8.74868	8.86874	8.28388	7.53322	7.3244	7.90982	8.49299	8.09722	6.71422	7.12437	6.97843	6.77856	6.15386	[R].APQSPTLAPAK.[V]	1xPhospho [S4]; 1xTMTpro [K11]; 1xTMTpro [N-Term]	P97792 [329-339]	P97792 1xPhospho [S332]	1	____APQsPTLAPAK	Cxadr
P97797	AQPAPkPEPSFSEyASVQVQR.P97797	3	AQPAPkPEPSFSEyASVQVQR	6.92e-05	7.32329	7.41306	7.23622	7.18517	7.41342	7.82556	7.72569	8.02238	7.89718	7.78271	7.96043	7.79712	8.29731	8.48564	8.06031	8.43368	8.32057	8.26348	9.23183	9.25929	[R].AQPAPKPEPSFSEYASVQVQR.[K]	1xPhospho [Y14]; 1xTMTpro [K6]; 1xTMTpro [N-Term]	P97797 [492-512]	P97797 1xPhospho [Y505]	1	PEPSFSEyASVQVQR	Sirpa
P97798	NSQDItPVDNSmDSNIHQR.P97798	5	NSQDItPVDNSmDSNIHQR	7.43e-05	4.21601	4.27319	4.31011	3.98181	4.46621	3.76582	4.00963	4.0592	4.24974	4.1129	3.72481	4.00468	3.15184	3.74196	3.39063	3.06006	2.40265	2.64691	2.50052	3.59149	[R].NSQDITPVDNSMDSNIHQR.[R]	1xPhospho [T6]; 1xOxidation [M12]; 1xTMTpro [N-Term]	P97798 [1224-1242]	P97798 1xPhospho [T1229]	1	__NSQDItPVDNSMD	Neo1
P97868	VEGTEIVkPsPk.P97868	6	VEGTEIVkPsPk	0.0227349	6.97232	7.23391	7.25584	6.91492	6.77906	6.33553	6.30904	6.57375	6.65507	6.7889	6.37507	6.4563	6.79716	6.98217	7.0199	6.71924	6.45592	6.56062	6.63565	6.81983	[K].VEGTEIVKPSPK.[R]	1xPhospho [S10]; 2xTMTpro [K8; K12]; 1xTMTpro [N-Term]	P97868 [1170-1181]	P97868 1xPhospho [S1179]	1	GTEIVKPsPK_____	Rbbp6
P98200	ATsVGDQLEAPAR.P98200	5	ATsVGDQLEAPAR	4.1e-05	6.43716	6.51304	6.93738	6.65612	6.82195	6.34097	6.78261	6.55969	6.80683	7.01478	6.15796	5.771	6.28948	5.97885	6.20881	5.93833	5.9145	5.77131	5.99557	5.81369	[R].ATSVGDQLEAPAR.[I]	1xPhospho [S3]; 1xTMTpro [N-Term]	P98200 [4-16]	P98200 1xPhospho [S6]	1	_____ATsVGDQLEA	Atp8a2
P98203	RSPsVDSTRkEPR.P98203	NA	RSPsVDSTRkEPR	0.393039	6.16779	6.56995	6.5842	6.81904	7.19923	6.64807	5.84327	5.3552	6.19039	7.00597	6.68616	6.95255	6.35992	6.46632	5.99959	6.55919	6.64658	6.98737	6.29588	6.64743	[R].RSPSVDSTRKEPR.[W]	1xPhospho [S4]; 1xTMTpro [K10]; 1xTMTpro [N-Term]	P98203 [344-356]	P98203 1xPhospho [S347]	1	____RSPsVDSTRKE	Arvcf
P98203	RSPsVDSTR.P98203	7	RSPsVDSTR	0.0256248	4.94267	4.48043	5.26399	4.21828	4.85667	4.96109	5.58087	5.76502	5.6097	5.65271	4.94086	4.67794	5.19017	5.71031	5.47245	5.2343	5.17736	5.24051	5.43595	5.47965	[R].RSPSVDSTR.[K]	1xPhospho [S4]; 1xTMTpro [N-Term]	P98203 [344-352]	P98203 1xPhospho [S347]	1	____RSPsVDSTR__	Arvcf
P98203	VVRRsPSVDSTR.P98203	NA	VVRRsPSVDSTR	0.239546	5.41456	5.12503	5.46207	4.83365	5.19999	5.23061	5.40018	5.20018	5.38428	5.7335	5.0304	4.63452	5.42002	5.28333	5.4311	4.88418	4.87275	5.2054	4.9139	5.28514	[R].VVRRSPSVDSTR.[K]	1xPhospho [S5]; 1xTMTpro [N-Term]	P98203 [341-352]	P98203 1xPhospho [S345]	1	___VVRRsPSVDSTR	Arvcf
Q00PI9	sPPPPEEEAk.Q00PI9	6	sPPPPEEEAk	0.00044834	6.03212	5.62671	6.32964	6.18661	5.81913	5.21571	4.89104	4.82101	5.3947	5.24206	5.00411	5.23542	5.30875	5.42419	5.31613	4.9454	5.21477	5.59067	5.41525	5.55056	[K].SPPPPEEEAK.[D]	1xPhospho [S1]; 1xTMTpro [K10]; 1xTMTpro [N-Term]	Q00PI9 [226-235]	Q00PI9 1xPhospho [S226]	1	_______sPPPPEEE	Hnrnpul2
Q00PI9	SkPAGsDGER.Q00PI9	NA	SkPAGsDGER	0.116459	7.64267	7.5249	7.84019	8.19234	7.5303	7.18237	7.22789	7.0802	7.42	7.32961	7.21603	6.75564	7.83889	7.65179	7.73321	7.32071	7.30216	7.40457	7.62201	7.72584	[K].SKPAGSDGER.[R]	1xPhospho [S6]; 1xTMTpro [K2]; 1xTMTpro [N-Term]	Q00PI9 [186-195]	Q00PI9 1xPhospho [S191]	1	__SKPAGsDGER___	Hnrnpul2
Q00PI9	sGDETPGSEAPGDk.Q00PI9	6	sGDETPGSEAPGDk	0.00918533	5.07976	5.14379	5.34559	5.51596	5.7255	4.60449	4.10521	4.31396	5.01104	5.1181	4.53215	5.10082	5.15547	5.24162	5.0813	5.20719	5.10025	5.64328	5.35451	5.81525	[R].SGDETPGSEAPGDK.[A]	1xPhospho [S1]; 1xTMTpro [K14]; 1xTMTpro [N-Term]	Q00PI9 [159-172]	Q00PI9 1xPhospho [S159]	1	_______sGDETPGS	Hnrnpul2
Q01063	SDSDYDLsPk.Q01063	3	SDSDYDLsPk	0.00247195	7.4594	7.20186	7.12316	7.26633	7.1407	7.4545	7.4669	7.82481	7.55865	7.85426	7.89531	7.41553	7.73628	8.25224	8.1234	7.73869	7.69083	7.76771	8.07507	8.19349	[R].SDSDYDLSPK.[S]	1xPhospho [S8]; 1xTMTpro [K10]; 1xTMTpro [N-Term]	Q01063 [134-143]	Q01063 1xPhospho [S141]	1	SDSDYDLsPK_____	Pde4d
Q01065	QPsLDVDVGDPNPDVVSFR.Q01065	3	QPsLDVDVGDPNPDVVSFR	0.0011313	4.68229	4.36696	5.05176	4.40451	5.22147	4.77436	4.40805	4.4856	4.72055	4.95095	5.27638	5.56752	5.23143	5.00541	5.19463	5.41288	5.33253	5.2505	5.71755	5.44932	[R].QPSLDVDVGDPNPDVVSFR.[A]	1xPhospho [S3]; 1xTMTpro [N-Term]	Q01065 [463-481]	Q01065 1xPhospho [S465]	1	_____QPsLDVDVGD	Pde1b
Q01097	sFTHSDck.Q01097	NA	sFTHSDck	0.442173	5.87759	5.95964	6.32439	6.5481	6.32424	5.93442	5.96109	6.09147	6.10275	6.03746	6.44631	5.53327	7.49694	6.57879	5.86389	6.47176	6.09918	6.33157	6.69374	6.64016	[R].SFTHSDCK.[S]	1xCarbamidomethyl [C7]; 1xPhospho [S1]; 1xTMTpro [K8]; 1xTMTpro [N-Term]	Q01097 [940-947]	Q01097 1xPhospho [S940]	1	_______sFTHSDCK	Grin2b
Q01097	LSsIESDV.Q01097	5	LSsIESDV	0.0808937	3.90756	3.59942	4.34809	4.11533	3.44252	4.03351	3.56281	4.12179	4.48499	3.65802	3.70937	3.42156	3.88762	3.78087	3.93572	3.11087	3.1024	3.37435	3.81934	3.6216	[K].LSSIESDV.[-]	1xPhospho [S3]; 1xTMTpro [N-Term]	Q01097 [1475-1482]	Q01097 1xPhospho [S1477]	1	_____LSsIESDV__	Grin2b
Q02248	TsmGGTQQQFVEGVR.Q02248	NA	TsmGGTQQQFVEGVR	0.456342	6.88498	6.76438	6.93801	6.96403	6.8623	6.8239	6.76689	6.50231	6.79954	6.96466	6.59415	6.5455	6.69279	6.83932	6.96577	6.7662	6.68717	6.60301	6.98023	6.88586	[R].TSMGGTQQQFVEGVR.[M]	1xPhospho [S2]; 1xOxidation [M3]; 1xTMTpro [N-Term]	Q02248 [551-565]	Q02248 1xPhospho [S552]	1	______TsMGGTQQQ	Ctnnb1
Q03137	VLEDDPEAAyTTR.Q03137	1	VLEDDPEAAyTTR	0.00252647	5.77479	6.00287	5.71997	5.43358	6.19308	5.68394	5.26479	4.63644	5.26592	5.30419	4.95389	4.56649	4.95533	4.99105	4.74013	4.75273	4.20865	5.01216	5.49869	4.9308	[R].VLEDDPEAAYTTR.[G]	1xPhospho [Y10]; 1xTMTpro [N-Term]	Q03137 [770-782]	Q03137 1xPhospho [Y779]	1	EDDPEAAyTTR____	Epha4
Q04447	VLtPELYAELR.Q04447	4	VLtPELYAELR	0.0144427	3.17416	2.83815	3.18336	3.12188	3.3457	2.78024	2.81451	3.25614	3.79849	3.34574	3.26693	2.81455	3.92726	3.48112	3.7968	4.12359	3.98498	4.06514	3.55177	3.84231	[K].VLTPELYAELR.[A]	1xPhospho [T3]; 1xTMTpro [N-Term]	Q04447 [33-43]	Q04447 1xPhospho [T35]	1	_____VLtPELYAEL	Ckb
Q04690	ksFDHLISDTk.Q04690	4	ksFDHLISDTk	0.0063116	6.35751	6.01014	5.88895	5.77076	5.98452	6.64028	7.27782	7.54654	7.10281	6.7677	6.38205	6.15266	7.37788	7.3487	7.42351	7.00285	6.89297	6.34068	7.33761	6.94718	[R].KSFDHLISDTK.[A]	1xPhospho [S2]; 2xTMTpro [K1; K11]; 1xTMTpro [N-Term]	Q04690 [2544-2554]	Q04690 1xPhospho [S2545]	1	______KsFDHLISD	Nf1
Q04690	SmsLDmGQPSQANTk.Q04690	3	SmsLDmGQPSQANTk	0.00168044	5.3002	5.51457	5.3544	5.06563	5.75843	5.56382	5.47843	5.52077	5.94803	6.20058	5.74936	6.09228	6.42879	6.52398	6.54775	5.97808	6.00834	5.98812	6.30887	6.09521	[K].SMSLDMGQPSQANTK.[K]	1xPhospho [S3]; 2xOxidation [M2; M6]; 1xTMTpro [K15]; 1xTMTpro [N-Term]	Q04690 [2523-2537]	Q04690 1xPhospho [S2525]	1	_____SMsLDMGQPS	Nf1
Q04690	SAGsFkR.Q04690	8	SAGsFkR	0.00107998	8.143	8.11287	8.27301	8.40813	8.115	8.36114	8.55209	8.55786	8.79278	8.80659	8.80795	8.52225	8.62169	8.62667	8.71187	8.6693	8.60472	8.52199	8.38458	8.69351	[R].SAGSFKR.[N]	1xPhospho [S4]; 1xTMTpro [K6]; 1xTMTpro [N-Term]	Q04690 [2828-2834]	Q04690 1xPhospho [S2831]	1	____SAGsFKR____	Nf1
Q04690	sFDHLISDTk.Q04690	4	sFDHLISDTk	0.00125524	5.70634	5.79442	5.531	5.07763	5.19742	6.10192	7.37378	7.80288	7.47152	6.76997	6.40831	6.26358	7.5711	7.32101	7.59303	7.20506	6.98248	6.19803	7.50253	6.98254	[K].SFDHLISDTK.[A]	1xPhospho [S1]; 1xTMTpro [K10]; 1xTMTpro [N-Term]	Q04690 [2545-2554]	Q04690 1xPhospho [S2545]	1	_______sFDHLISD	Nf1
Q04735	RVsLSEIGFGk.Q04735	7	RVsLSEIGFGk	0.00328488	5.56256	5.27356	5.47439	5.36319	4.91856	6.10669	6.81121	6.90736	6.65586	6.14157	6.29646	5.52333	6.98857	7.11155	7.15538	6.53168	6.05399	5.44139	6.27852	5.92643	[R].RVSLSEIGFGK.[L]	1xPhospho [S3]; 1xTMTpro [K11]; 1xTMTpro [N-Term]	Q04735 [151-161]	Q04735 1xPhospho [S153]	1	_____RVsLSEIGFG	Cdk16
Q05BC3	REsSGDSk.Q05BC3	7	REsSGDSk	0.00988213	4.07524	3.34936	4.21021	4.09788	4.1115	4.70057	5.83886	5.31583	5.19111	4.65765	4.4522	3.98962	5.24633	5.27651	5.41107	4.96166	4.2607	4.06029	4.58994	4.33052	[R].RESSGDSK.[G]	1xPhospho [S3]; 1xTMTpro [K8]; 1xTMTpro [N-Term]	Q05BC3 [144-151]	Q05BC3 1xPhospho [S146]	1	_____REsSGDSK__	Eml1
Q06649	AHsFTSk.Q06649	5	AHsFTSk	6.73e-09	7.19779	6.98761	6.9868	7.2495	7.03078	6.57296	6.55441	5.64952	6.6195	6.67566	5.45111	5.02323	5.20659	5.10211	4.96681	4.56542	4.38679	4.52584	4.41797	4.62627	[R].AHSFTSK.[S]	1xPhospho [S3]; 1xTMTpro [K7]; 1xTMTpro [N-Term]	Q06649 [223-229]	Q06649 1xPhospho [S225]	1	_____AHsFTSK___	Sh3bp2
Q08274	SNsLPHPAGGGk.Q08274	NA	SNsLPHPAGGGk	0.162213	6.74519	6.57112	7.1192	6.91274	6.89906	6.71807	6.61737	6.14969	6.79258	6.80668	6.74541	6.99728	6.83728	6.77074	7.26774	6.93788	6.56982	6.65204	6.74542	6.50037	[R].SNSLPHPAGGGK.[A]	1xPhospho [S3]; 1xTMTpro [K12]; 1xTMTpro [N-Term]	Q08274 [485-496]	Q08274 1xPhospho [S487]	1	_____SNsLPHPAGG	Dmwd
Q08274	YHsLGNISR.Q08274	5	YHsLGNISR	0.0114847	5.85247	6.04918	5.98922	5.73033	6.30505	6.04417	5.81811	5.45091	5.72627	5.9273	5.96357	5.50334	5.77238	5.71206	5.82508	5.20177	5.16283	5.48395	5.46112	5.78634	[R].YHSLGNISR.[G]	1xPhospho [S3]; 1xTMTpro [N-Term]	Q08274 [535-543]	Q08274 1xPhospho [S537]	1	_____YHsLGNISR_	Dmwd
Q08460	RLEDEQPPTLsPk.Q08460	3	RLEDEQPPTLsPk	0.00157686	6.78675	6.64347	7.44682	7.28402	7.07625	7.1003	7.12713	7.25211	7.67377	7.44514	7.43293	7.29115	7.66198	7.61073	7.74453	7.836	7.71679	7.76508	7.80682	7.83096	[R].RLEDEQPPTLSPK.[K]	1xPhospho [S11]; 1xTMTpro [K13]; 1xTMTpro [N-Term]	Q08460 [701-713]	Q08460 1xPhospho [S711]	1	DEQPPTLsPK_____	Kcnma1
Q08460	NSPNTsPk.Q08460	3	NSPNTsPk	8.66e-05	5.61114	5.9957	6.51614	6.42052	6.19546	6.12333	6.27507	6.48625	6.7339	6.94194	6.72286	7.65195	7.15007	7.07707	8.20176	7.93593	7.68654	7.76953	7.52547	7.79227	[R].NSPNTSPK.[L]	1xPhospho [S6]; 1xTMTpro [K8]; 1xTMTpro [N-Term]	Q08460 [723-730]	Q08460 1xPhospho [S728]	1	__NSPNTsPK_____	Kcnma1
Q0KL02	TRPGAVsPLNsPLSTTFPSPFGk.Q0KL02	5	TRPGAVsPLNsPLSTTFPSPFGk	0.00945879	4.40999	4.11751	4.66439	4.42796	4.62152	4.34654	3.9649	3.95113	4.08427	3.9487	3.59327	4.09256	3.68315	3.95668	3.86841	2.73493	2.86256	4.18838	3.83107	3.7938	[K].TRPGAVSPLNSPLSTTFPSPFGK.[E]	2xPhospho [S7; S11]; 1xTMTpro [K23]; 1xTMTpro [N-Term]	Q0KL02 [2452-2474]	Q0KL02 2xPhospho [S2458; S2462]	2	_TRPGAVsPLNsPLS	Trio
Q0PHV7	AGPFLTPsPLHAVALR.Q0PHV7	1	AGPFLTPsPLHAVALR	0.000872262	3.33952	3.60044	4.0585	4.53952	4.51637	3.52958	3.20664	3.20899	3.51474	3.28354	3.09482	3.03599	2.9321	3.21587	2.95132	2.67361	3.16755	2.84194	3.043	3.26504	[R].AGPFLTPSPLHAVALR.[S]	1xPhospho [S8]; 1xTMTpro [N-Term]	Q0PHV7 [210-225]	Q0PHV7 1xPhospho [S217]	1	AGPFLTPsPLHAVAL	Dact3
Q0PHV7	GIYASERPksLGDASPSAPESVGAR.Q0PHV7	5	GIYASERPksLGDASPSAPESVGAR	0.0170303	6.00613	5.7289	6.40409	6.13825	6.0877	5.71939	5.603	5.57515	6.02866	6.18768	5.9175	5.98536	6.05029	6.16922	6.03665	5.41513	5.00998	5.4376	5.7926	5.86869	[R].GIYASERPKSLGDASPSAPESVGAR.[V]	1xPhospho [S10]; 1xTMTpro [K9]; 1xTMTpro [N-Term]	Q0PHV7 [156-180]	Q0PHV7 1xPhospho [S165]	1	YASERPKsLGDASPS	Dact3
Q0PHV7	sLGDASPSAPESVGAR.Q0PHV7	6	sLGDASPSAPESVGAR	0.173866	5.15873	5.01978	5.29778	5.40124	5.28108	4.90584	4.69283	4.92501	4.96507	5.12644	4.70798	5.10192	5.34294	5.13929	5.42106	5.01361	4.83618	5.2943	5.31896	5.3409	[K].SLGDASPSAPESVGAR.[V]	1xPhospho [S1]; 1xTMTpro [N-Term]	Q0PHV7 [165-180]	Q0PHV7 1xPhospho [S165]	1	_______sLGDASPS	Dact3
Q11011	kTsPPSV.Q11011	3	kTsPPSV	0.00037954	5.53703	5.83718	6.24897	5.92648	5.98826	6.25578	6.15953	6.19958	6.37287	6.4399	6.50965	6.56517	6.43969	6.38864	6.54439	6.57412	6.35549	6.34922	6.35526	6.62547	[R].KTSPPSV.[-]	1xPhospho [S3]; 1xTMTpro [K1]; 1xTMTpro [N-Term]	Q11011 [914-920]	Q11011 1xPhospho [S916]	1	_____KTsPPSV___	Npepps
Q148V7	AGsISTLDSLDFAR.Q148V7	6	AGsISTLDSLDFAR	0.287349	3.70085	3.91738	3.88586	4.13239	4.32284	2.99856	3.82052	3.12605	3.99238	4.03574	3.57002	4.25941	3.99731	3.86957	4.2226	3.43252	4.11112	4.27664	4.19866	3.81194	[R].AGSISTLDSLDFAR.[Y]	1xPhospho [S3]; 1xTMTpro [N-Term]	Q148V7 [178-191]	Q148V7 1xPhospho [S180]	1	_____AGsISTLDSL	Relch
Q148V7	QSGtPPGmGAPGIPGASIVGGAGGR.Q148V7	1	QSGtPPGmGAPGIPGASIVGGAGGR	0.000755228	6.81321	6.65714	7.1197	7.05707	6.79322	6.50514	6.47143	6.34466	7.02664	6.87361	6.12941	6.30888	6.34947	6.24912	6.29446	6.32586	6.39442	6.29986	6.41135	6.45921	[R].QSGTPPGMGAPGIPGASIVGGAGGR.[E]	1xPhospho [T4]; 1xOxidation [M8]; 1xTMTpro [N-Term]	Q148V7 [140-164]	Q148V7 1xPhospho [T143]	1	____QSGtPPGMGAP	Relch
Q14CH0	HINNNLsPSLGDAQEEkR.Q14CH0	5	HINNNLsPSLGDAQEEkR	0.0038249	5.84652	6.11716	6.27621	6.20446	6.2799	6.13789	6.10272	6.34393	5.76278	6.17969	6.0971	5.60403	5.80304	5.8603	5.66007	5.59193	5.40069	5.44204	5.62858	5.9755	[K].HINNNLSPSLGDAQEEKR.[Y]	1xPhospho [S7]; 1xTMTpro [K17]; 1xTMTpro [N-Term]	Q14CH0 [495-512]	Q14CH0 1xPhospho [S501]	1	_HINNNLsPSLGDAQ	Fam171b
Q14CH0	HILEGGSGVIIEHPGEEsPGRk.Q14CH0	3	HILEGGSGVIIEHPGEEsPGRk	0.00563265	5.27053	5.77736	5.54567	5.76072	5.80147	5.94316	5.54922	5.96092	5.86493	5.90499	5.76627	5.99971	5.99012	6.12702	6.23887	5.90862	6.04232	6.1528	6.35851	6.39193	[R].HILEGGSGVIIEHPGEESPGRK.[S]	1xPhospho [S18]; 1xTMTpro [K22]; 1xTMTpro [N-Term]	Q14CH0 [760-781]	Q14CH0 1xPhospho [S777]	1	IEHPGEEsPGRK___	Fam171b
Q2KN98	SksDNQISDkAALEAk.Q2KN98	5	SksDNQISDkAALEAk	0.0845735	7.64778	7.73595	7.55272	7.8803	8.17095	7.92524	7.22637	6.6689	7.41624	8.01814	7.61816	7.72	7.1774	7.24546	7.22489	7.09102	7.19845	7.1669	7.08291	7.39366	[K].SKSDNQISDKAALEAK.[V]	1xPhospho [S3]; 3xTMTpro [K2; K10; K16]; 1xTMTpro [N-Term]	Q2KN98 [169-184]	Q2KN98 1xPhospho [S171]	1	_____SKsDNQISDK	Specc1l
Q2M3X8	SksDTPYLAEAR.Q2M3X8	3	SksDTPYLAEAR	1.71e-06	7.92452	7.92312	7.98801	8.13306	8.42457	9.08984	8.8192	8.54298	9.24027	9.3439	8.90855	9.30815	9.55042	9.17139	9.51745	9.75391	9.55923	9.55031	9.74917	9.88162	[R].SKSDTPYLAEAR.[I]	1xPhospho [S3]; 1xTMTpro [K2]; 1xTMTpro [N-Term]	Q2M3X8 [65-76]	Q2M3X8 1xPhospho [S67]	1	_____SKsDTPYLAE	Phactr1
Q2M3X8	kLsQRPTVEELR.Q2M3X8	NA	kLsQRPTVEELR	0.982236	5.75967	6.07154	6.25467	6.16354	6.34355	5.80193	6.25472	5.96761	6.33348	6.20414	5.60454	6.18225	6.73719	5.93581	6.38254	6.36307	6.15949	5.89464	6.18852	6.23711	[R].KLSQRPTVEELR.[E]	1xPhospho [S3]; 1xTMTpro [K1]; 1xTMTpro [N-Term]	Q2M3X8 [503-514]	Q2M3X8 1xPhospho [S505]	1	_____KLsQRPTVEE	Phactr1
Q2M3X8	SDSLVPGTHtPPIR.Q2M3X8	NA	SDSLVPGTHtPPIR	0.250911	5.80495	5.72661	6.15142	5.9889	5.61769	5.58691	5.34551	5.63131	5.42288	5.80153	5.59804	5.68657	5.837	5.81381	5.93738	5.32327	5.44352	5.79991	5.94859	6.05535	[R].SDSLVPGTHTPPIR.[R]	1xPhospho [T10]; 1xTMTpro [N-Term]	Q2M3X8 [95-108]	Q2M3X8 1xPhospho [T104]	1	SLVPGTHtPPIR___	Phactr1
Q2NL51	TSsFAEPGGGGGGGGGGPGGSASGPGGTGGGk.Q2NL51	5	TSsFAEPGGGGGGGGGGPGGSASGPGGTGGGk	0.001278	6.52433	6.45249	5.91079	6.06263	6.85188	6.34362	6.1876	5.74109	6.51933	6.61199	5.61281	5.59832	5.90299	5.66655	6.32258	5.42777	5.40246	5.15138	5.59589	4.51376	[R].TSSFAEPGGGGGGGGGGPGGSASGPGGTGGGK.[A]	1xPhospho [S3]; 1xTMTpro [K32]; 1xTMTpro [N-Term]	Q2NL51 [19-50]	Q2NL51 1xPhospho [S21]	1	_____TSsFAEPGGG	Gsk3a
Q2PFD7	NVsERkDHRPETPGIk.Q2PFD7	6	NVsERkDHRPETPGIk	0.0416025	5.17192	5.61407	6.29074	6.4972	6.3996	5.79825	4.91541	3.85629	5.50671	6.68741	6.11231	7.19856	6.25267	6.12595	6.40164	6.87719	6.80194	6.59151	6.28581	6.73663	[R].NVSERKDHRPETPGIK.[Q]	1xPhospho [S3]; 2xTMTpro [K6; K16]; 1xTMTpro [N-Term]	Q2PFD7 [1018-1033]	Q2PFD7 1xPhospho [S1020]	1	_____NVsERKDHRP	Psd3
Q2PFD7	IGsTTNPFLDIPHDPNAAVYk.Q2PFD7	3	IGsTTNPFLDIPHDPNAAVYk	0.0299867	3.18159	3.37674	3.66646	3.50928	3.10832	3.90838	3.40751	2.89687	3.71608	4.18238	3.94117	3.99627	4.45898	4.44419	3.91448	4.05354	4.28734	3.38314	5.16167	4.18181	[R].IGSTTNPFLDIPHDPNAAVYK.[S]	1xPhospho [S3]; 1xTMTpro [K21]; 1xTMTpro [N-Term]	Q2PFD7 [757-777]	Q2PFD7 1xPhospho [S759]	1	_____IGsTTNPFLD	Psd3
Q3B7Z2	SLsELESLk.Q3B7Z2	4	SLsELESLk	0.00184325	3.71856	2.87775	3.92549	3.97695	3.31546	3.91746	4.32788	4.78142	4.42402	4.07417	4.12461	4.31299	4.73531	4.69422	4.99702	4.54416	4.3783	4.41362	4.66114	4.67868	[R].SLSELESLK.[L]	1xPhospho [S3]; 1xTMTpro [K9]; 1xTMTpro [N-Term]	Q3B7Z2 [236-244]	Q3B7Z2 1xPhospho [S238]	1	_____SLsELESLK_	Osbp
Q3TEA8	AVNSTREtPPkSk.Q3TEA8	6	AVNSTREtPPkSk	0.000221082	7.07352	7.03948	7.40425	7.74424	7.5933	6.50797	6.08216	6.13971	6.51009	6.63728	6.62573	6.91361	6.99312	6.89053	7.01645	6.79578	6.91176	7.33191	6.99097	7.13402	[R].AVNSTRETPPKSK.[L]	1xPhospho [T8]; 2xTMTpro [K11; K13]; 1xTMTpro [N-Term]	Q3TEA8 [44-56]	Q3TEA8 1xPhospho [T51]	1	AVNSTREtPPKSK__	Hp1bp3
Q3TEA8	AVNSTREtPPk.Q3TEA8	6	AVNSTREtPPk	0.000300971	5.19996	5.53002	5.67892	5.93092	5.96723	4.92251	5.213	5.03573	5.16661	4.94074	5.36748	5.6012	5.82776	5.42458	5.56141	5.74152	5.91631	5.80809	5.90386	6.23999	[R].AVNSTRETPPK.[S]	1xPhospho [T8]; 1xTMTpro [K11]; 1xTMTpro [N-Term]	Q3TEA8 [44-54]	Q3TEA8 1xPhospho [T51]	1	AVNSTREtPPK____	Hp1bp3
Q3TES0	AAsPGR.Q3TES0	4	AAsPGR	0.00014694	4.24692	4.13374	4.40646	4.11804	4.26728	4.59742	5.18959	5.51902	5.26364	5.03424	5.06732	4.92577	5.62275	5.77139	5.54991	5.07972	5.16705	4.89948	5.45755	5.41571	[R].AASPGR.[Q]	1xPhospho [S3]; 1xTMTpro [N-Term]	Q3TES0 [264-269]	Q3TES0 1xPhospho [S266]	1	_____AAsPGR____	Iqsec3
Q3TES0	QGsPTAkR.Q3TES0	8	QGsPTAkR	0.00967502	6.28539	6.31866	6.75912	6.79627	6.8583	6.54526	6.21204	6.23491	6.48405	6.91319	6.89129	7.33893	7.29254	7.0443	6.97262	6.58095	6.50565	6.86113	6.77016	7.0336	[K].QGSPTAKR.[E]	1xPhospho [S3]; 1xTMTpro [K7]; 1xTMTpro [N-Term]	Q3TES0 [1021-1028]	Q3TES0 1xPhospho [S1023]	1	_____QGsPTAKR__	Iqsec3
Q3THG9	ELsLDDPEVEQVR.Q3THG9	2	ELsLDDPEVEQVR	0.000569115	4.75432	4.57186	4.46829	4.49275	4.56614	4.90833	5.17311	4.64438	5.14493	5.02847	4.07895	4.17225	4.51505	4.77826	4.42928	3.83822	4.18836	4.05549	4.5048	4.18489	[R].ELSLDDPEVEQVR.[G]	1xPhospho [S3]; 1xTMTpro [N-Term]	Q3THG9 [172-184]	Q3THG9 1xPhospho [S174]	1	_____ELsLDDPEVE	Aarsd1
Q3THK7	TLNmTTsPEEk.Q3THK7	3	TLNmTTsPEEk	0.0340027	5.9911	6.24672	6.56715	6.35581	6.13622	6.20729	6.40388	6.46156	6.44363	6.37389	6.43645	6.25263	6.53248	6.71493	6.91375	6.5813	6.54701	6.43882	7.04198	6.94302	[K].TLNMTTSPEEK.[R]	1xPhospho [S7]; 1xOxidation [M4]; 1xTMTpro [K11]; 1xTMTpro [N-Term]	Q3THK7 [326-336]	Q3THK7 1xPhospho [S332]	1	_TLNMTTsPEEK___	Gmps
Q3TLH4	QPsPEELRER.Q3TLH4	NA	QPsPEELRER	0.907623	4.28956	4.55153	4.57431	4.44674	4.3381	4.24646	4.09298	4.3477	4.77669	4.29928	4.27627	4.27551	4.54836	4.56031	4.60662	4.01017	4.49862	4.19077	4.71201	4.68577	[K].QPSPEELRER.[E]	1xPhospho [S3]; 1xTMTpro [N-Term]	Q3TLH4 [499-508]	Q3TLH4 1xPhospho [S501]	1	_____QPsPEELRER	Prrc2c
Q3TLH4	LGIIEkQPsPEELRER.Q3TLH4	NA	LGIIEkQPsPEELRER	0.575693	4.44517	4.40536	4.68654	5.17577	4.59293	4.49946	4.34546	3.94434	4.36503	4.94178	4.2946	4.9444	4.27886	4.39505	4.62453	4.32197	4.79911	4.09017	4.434	4.41573	[K].LGIIEKQPSPEELRER.[E]	1xPhospho [S9]; 1xTMTpro [K6]; 1xTMTpro [N-Term]	Q3TLH4 [493-508]	Q3TLH4 1xPhospho [S501]	1	GIIEKQPsPEELRER	Prrc2c
Q3TLI0	SPsDNSLNTTGIIcR.Q3TLI0	5	SPsDNSLNTTGIIcR	0.189579	5.48625	5.26069	5.73559	5.67648	5.64129	5.33847	5.49217	5.67916	5.57662	5.64372	5.31663	5.15577	5.50491	5.2478	5.49594	5.47252	5.44043	5.48821	5.58189	5.99979	[R].SPSDNSLNTTGIICR.[N]	1xCarbamidomethyl [C14]; 1xPhospho [S3]; 1xTMTpro [N-Term]	Q3TLI0 [683-697]	Q3TLI0 1xPhospho [S685]	1	_____SPsDNSLNTT	NA
Q3TLI0	RQEsGSSLEPPSGLALEDGAHVLR.Q3TLI0	NA	RQEsGSSLEPPSGLALEDGAHVLR	0.254403	7.20777	7.13251	7.48581	7.42837	7.70418	7.19269	6.9481	6.85654	7.32153	7.36816	7.09125	7.35192	7.19092	7.36826	7.27877	7.18885	7.10137	7.40523	7.38709	7.37747	[R].RQESGSSLEPPSGLALEDGAHVLR.[C]	1xPhospho [S4]; 1xTMTpro [N-Term]	Q3TLI0 [705-728]	Q3TLI0 1xPhospho [S708]	1	____RQEsGSSLEPP	NA
Q3TWL2	IINLGPVHPGPLsPEPQPmGVR.Q3TWL2	5	IINLGPVHPGPLsPEPQPmGVR	0.019512	6.24803	6.20255	6.5041	6.19462	6.21108	6.03256	6.00612	5.85839	6.36316	6.2442	5.57804	5.98007	5.86507	6.00262	6.16191	5.5553	5.89569	5.59674	6.02428	6.04322	[R].IINLGPVHPGPLSPEPQPMGVR.[V]	1xPhospho [S13]; 1xOxidation [M19]; 1xTMTpro [N-Term]	Q3TWL2 [157-178]	Q3TWL2 1xPhospho [S169]	1	PVHPGPLsPEPQPMG	Pip4p1
Q3TY60	APTIQPQHsHEAVRR.Q3TY60	8	APTIQPQHsHEAVRR	0.028281	3.69695	3.93163	4.00485	3.80361	4.73211	3.97503	3.41815	3.42075	3.74565	3.83475	4.33289	4.17437	4.53584	4.97199	4.25493	4.08556	4.20147	4.21028	4.65093	3.62643	[K].APTIQPQHSHEAVRR.[D]	1xPhospho [S9]; 1xTMTpro [N-Term]	Q3TY60 [94-108]	Q3TY60 1xPhospho [S102]	1	PTIQPQHsHEAVRR_	Fam131b
Q3TY60	RDTDAYSDLsDGEkEAR.Q3TY60	3	RDTDAYSDLsDGEkEAR	0.000175748	6.03853	6.06172	6.63263	6.59519	6.89322	6.43419	6.30722	6.65643	6.50694	7.01276	7.01659	7.2143	6.95882	7.2409	7.2562	7.36535	7.43531	7.56879	7.23705	7.31583	[R].RDTDAYSDLSDGEKEAR.[F]	1xPhospho [S10]; 1xTMTpro [K14]; 1xTMTpro [N-Term]	Q3TY60 [108-124]	Q3TY60 1xPhospho [S117]	1	TDAYSDLsDGEKEAR	Fam131b
Q3TY60	VSDVTSSGVQsFDEEEGDANN.Q3TY60	6	VSDVTSSGVQsFDEEEGDANN	0.00272541	5.77711	5.80181	6.27113	6.1387	5.9476	5.64961	5.55476	5.39096	5.84194	5.5994	5.53254	5.63853	5.47865	5.69409	5.7364	5.8402	5.8766	5.86079	5.92354	6.03804	[K].VSDVTSSGVQSFDEEEGDANN.[-]	1xPhospho [S11]; 1xTMTpro [N-Term]	Q3TY60 [312-332]	Q3TY60 1xPhospho [S322]	1	VTSSGVQsFDEEEGD	Fam131b
Q3TY60	DTDAYSDLsDGEkEAR.Q3TY60	3	DTDAYSDLsDGEkEAR	0.000551502	6.76	6.6529	7.54885	7.61359	7.45248	7.21261	7.22674	7.58594	7.36199	7.64924	8.09732	8.17193	7.63576	7.72604	8.00814	8.23342	8.29401	8.47194	7.95289	8.12581	[R].DTDAYSDLSDGEKEAR.[F]	1xPhospho [S9]; 1xTMTpro [K13]; 1xTMTpro [N-Term]	Q3TY60 [109-124]	Q3TY60 1xPhospho [S117]	1	TDAYSDLsDGEKEAR	Fam131b
Q3TZZ7	RPsVSk.Q3TZZ7	7	RPsVSk	0.00762078	5.96679	5.46463	6.53365	5.8893	5.39962	6.54868	7.03288	7.18358	6.84934	6.70099	6.45655	5.94077	7.06782	6.86673	7.39325	6.98667	6.53906	6.32941	6.82751	6.8933	[K].RPSVSK.[E]	1xPhospho [S3]; 1xTMTpro [K6]; 1xTMTpro [N-Term]	Q3TZZ7 [598-603]	Q3TZZ7 1xPhospho [S600]	1	_____RPsVSK____	Esyt2
Q3U0M1	FNFESVPEsPGEk.Q3U0M1	NA	FNFESVPEsPGEk	0.403525	4.31292	4.48763	4.54658	4.1942	4.61872	3.86273	4.23134	4.90743	4.59904	4.13639	4.09966	4.14831	4.15249	4.05114	4.41355	4.09242	3.97997	3.45159	4.48226	4.52712	[K].FNFESVPESPGEK.[G]	1xPhospho [S9]; 1xTMTpro [K13]; 1xTMTpro [N-Term]	Q3U0M1 [945-957]	Q3U0M1 1xPhospho [S953]	1	NFESVPEsPGEK___	Trappc9
Q3U0V1	VQIsPDSGGLPER.Q3U0V1	2	VQIsPDSGGLPER	0.0580156	7.54974	7.60319	6.08495	6.16352	6.57342	7.14957	7.20572	6.85523	5.98521	6.25012	6.04177	5.4687	6.27948	6.08519	6.52472	5.22531	5.50018	5.20111	6.37078	6.55143	[K].VQISPDSGGLPER.[S]	1xPhospho [S4]; 1xTMTpro [N-Term]	Q3U0V1 [179-191]	Q3U0V1 1xPhospho [S182]	1	____VQIsPDSGGLP	Khsrp
Q3U1F9	FSsLSYk.Q3U1F9	1	FSsLSYk	2.04e-06	6.61903	6.55732	6.28976	6.40347	6.60408	6.03827	6.03181	5.64209	6.28191	6.17983	5.66809	5.65006	5.70968	5.72451	5.75255	5.70677	5.60289	5.55094	5.60163	5.58573	[R].FSSLSYK.[S]	1xPhospho [S3]; 1xTMTpro [K7]; 1xTMTpro [N-Term]	Q3U1F9 [291-297]	Q3U1F9 1xPhospho [S293]	1	_____FSsLSYK___	Pag1
Q3U1Y4	SGsLGSAR.Q3U1Y4	3	SGsLGSAR	1.18e-05	6.63575	6.93514	6.97526	6.81191	7.06097	7.05852	6.81564	6.8933	7.50766	7.5526	7.68182	7.87507	7.81486	7.93615	7.7932	7.64588	7.84692	7.96904	8.07869	8.05564	[K].SGSLGSAR.[G]	1xPhospho [S3]; 1xTMTpro [N-Term]	Q3U1Y4 [959-966]	Q3U1Y4 1xPhospho [S961]	1	_____SGsLGSAR__	Dennd4b
Q3U1Y4	SAPSsPAPR.Q3U1Y4	3	SAPSsPAPR	1.22e-05	5.35946	5.73178	5.70795	5.93743	5.41284	6.02219	6.00693	6.08894	6.50483	6.46136	6.56914	6.45372	6.37049	7.14593	6.81982	6.9616	6.68045	6.99477	7.18442	7.25827	[R].SAPSSPAPR.[R]	1xPhospho [S5]; 1xTMTpro [N-Term]	Q3U1Y4 [732-740]	Q3U1Y4 1xPhospho [S736]	1	___SAPSsPAPR___	Dennd4b
Q3U214	VYSsSEFLAVQPTPTFAER.Q3U214	NA	VYSsSEFLAVQPTPTFAER	0.648666	3.81314	2.99992	3.27976	3.76191	3.58898	3.3776	3.18657	2.97533	3.58923	3.60786	3.15726	2.43255	3.83112	3.25135	3.5134	3.38732	3.42176	3.26156	3.95732	3.49674	[K].VYSSSEFLAVQPTPTFAER.[S]	1xPhospho [S4]; 1xTMTpro [N-Term]	Q3U214 [729-747]	Q3U214 1xPhospho [S732]	1	____VYSsSEFLAVQ	Mast3
Q3U214	SSESVVDEDGGRsPR.Q3U214	3	SSESVVDEDGGRsPR	0.000149642	5.33343	4.90578	5.22446	5.70548	5.23183	4.60754	4.91597	5.50764	5.17424	5.23523	5.6832	5.98997	6.21489	6.19403	5.91095	5.91306	5.97986	5.95767	6.04415	6.51059	[R].SSESVVDEDGGRSPR.[L]	1xPhospho [S13]; 1xTMTpro [N-Term]	Q3U214 [156-170]	Q3U214 1xPhospho [S168]	1	VDEDGGRsPR_____	Mast3
Q3U214	HFRsSESVVDEDGGRSPR.Q3U214	6	HFRsSESVVDEDGGRSPR	0.0530331	4.99121	5.03152	5.67605	5.44406	5.72782	4.81283	4.37712	4.31298	5.39474	5.23694	5.1617	5.64539	5.00663	5.30269	5.08095	5.43235	5.47729	5.79142	5.21365	5.49505	[K].HFRSSESVVDEDGGRSPR.[L]	1xPhospho [S4]; 1xTMTpro [N-Term]	Q3U214 [153-170]	Q3U214 1xPhospho [S156]	1	____HFRsSESVVDE	Mast3
Q3U214	QEAVQEVsFDEEPGPPR.Q3U214	6	QEAVQEVsFDEEPGPPR	0.0992509	5.29235	5.03939	5.23907	5.37601	5.57188	5.29885	5.30605	5.30729	5.38564	5.51745	5.03626	5.14082	5.56863	5.50335	5.69457	5.65012	5.64121	5.43733	5.61573	5.74962	[K].QEAVQEVSFDEEPGPPR.[G]	1xPhospho [S8]; 1xTMTpro [N-Term]	Q3U214 [1282-1298]	Q3U214 1xPhospho [S1289]	1	QEAVQEVsFDEEPGP	Mast3
Q3U214	RLsADLR.Q3U214	3	RLsADLR	1.22e-05	6.80952	6.99856	6.76763	6.8626	6.8391	6.9996	6.66728	7.17745	7.13714	7.20628	7.21557	8.15543	8.71374	7.64448	8.42304	8.52948	8.51167	8.18009	8.67537	8.91194	[R].RLSADLR.[L]	1xPhospho [S3]; 1xTMTpro [N-Term]	Q3U214 [767-773]	Q3U214 1xPhospho [S769]	1	_____RLsADLR___	Mast3
Q3UFT3	SLsEkSR.Q3UFT3	NA	SLsEkSR	0.0762713	7.62282	7.87438	8.14384	7.99167	8.07537	8.6256	8.03337	7.45854	8.21117	9.01513	8.64606	8.67569	8.16106	8.22051	8.31041	7.6889	7.91705	8.04514	7.53269	7.90065	[R].SLSEKSR.[C]	1xPhospho [S3]; 1xTMTpro [K5]; 1xTMTpro [N-Term]	Q3UFT3 [471-477]	Q3UFT3 1xPhospho [S473]	1	_____SLsEKSR___	Garem1
Q3UFT3	AtPETSPLPLk.Q3UFT3	NA	AtPETSPLPLk	0.22151	3.69104	4.51678	4.46596	4.21004	4.32479	3.92045	3.97564	3.44867	4.2194	4.08145	3.88853	3.85445	4.19313	3.94493	4.22892	4.12706	3.7853	3.87153	3.89605	3.98379	[K].ATPETSPLPLK.[I]	1xPhospho [T2]; 1xTMTpro [K11]; 1xTMTpro [N-Term]	Q3UFT3 [737-747]	Q3UFT3 1xPhospho [T738]	1	______AtPETSPLP	Garem1
Q3UFT3	TDWNEDcksPk.Q3UFT3	7	TDWNEDcksPk	0.0018721	6.50009	6.32805	6.67074	6.42406	6.46287	6.96699	7.14734	7.41072	7.07649	7.35663	6.77402	6.23566	6.96166	6.92092	6.91737	6.51433	6.49538	6.40007	6.97425	6.79273	[K].TDWNEDCKSPK.[K]	1xCarbamidomethyl [C7]; 1xPhospho [S9]; 2xTMTpro [K8; K11]; 1xTMTpro [N-Term]	Q3UFT3 [348-358]	Q3UFT3 1xPhospho [S356]	1	DWNEDCKsPK_____	Garem1
Q3UGY8	VAAPSSsPSAEAEYWR.Q3UGY8	3	VAAPSSsPSAEAEYWR	2.2e-05	6.17433	6.19006	6.2951	6.35895	6.45914	6.16859	6.21986	6.41056	6.52911	6.6139	6.56461	7.01993	6.89429	6.69834	6.94354	6.85454	7.04769	6.98986	6.99695	7.1514	[R].VAAPSSSPSAEAEYWR.[I]	1xPhospho [S7]; 1xTMTpro [N-Term]	Q3UGY8 [1640-1655]	Q3UGY8 1xPhospho [S1646]	1	_VAAPSSsPSAEAEY	Arfgef3
Q3UGY8	GPDsPLLQRPQHLIDQGQmR.Q3UGY8	1	GPDsPLLQRPQHLIDQGQmR	0.0342006	5.66478	5.75514	5.9485	6.24837	5.86051	5.40527	5.43137	5.71745	5.69574	5.7498	5.52768	5.52306	5.48967	5.70511	5.6367	5.556	5.33646	5.35145	5.67426	5.8032	[R].GPDSPLLQRPQHLIDQGQMR.[H]	1xPhospho [S4]; 1xOxidation [M19]; 1xTMTpro [N-Term]	Q3UGY8 [2051-2070]	Q3UGY8 1xPhospho [S2054]	1	____GPDsPLLQRPQ	Arfgef3
Q3UH66	AGsLGPETPSR.Q3UH66	5	AGsLGPETPSR	0.72708	6.18935	6.19702	6.0113	6.44093	6.61721	6.23823	6.08416	5.3361	6.36058	6.67104	6.06356	6.42352	5.7512	5.97395	6.3766	6.02316	6.28127	6.01162	6.07363	5.93513	[R].AGSLGPETPSR.[A]	1xPhospho [S3]; 1xTMTpro [N-Term]	Q3UH66 [1795-1805]	Q3UH66 1xPhospho [S1797]	1	_____AGsLGPETPS	Wnk2
Q3UHB8	YVLTsPR.Q3UHB8	3	YVLTsPR	4.43e-07	7.84274	7.87135	8.10177	7.98618	7.87759	8.14455	7.88074	8.22361	8.53054	8.61826	8.6958	9.15452	9.38873	9.16232	9.46993	9.41943	9.45894	9.45925	9.79244	9.85322	[R].YVLTSPR.[S]	1xPhospho [S5]; 1xTMTpro [N-Term]	Q3UHB8 [86-92]	Q3UHB8 1xPhospho [S90]	1	___YVLTsPR_____	Ccdc177
Q3UHB8	SHsLDSLSR.Q3UHB8	3	SHsLDSLSR	5.31e-05	4.62619	5.1287	5.60655	5.07774	5.33458	4.94694	5.0677	5.57044	5.62437	5.40586	5.50833	6.02684	6.2884	6.10857	6.02159	6.34387	6.4154	6.39486	6.25888	6.85098	[K].SHSLDSLSR.[R]	1xPhospho [S3]; 1xTMTpro [N-Term]	Q3UHB8 [229-237]	Q3UHB8 1xPhospho [S231]	1	_____SHsLDSLSR_	Ccdc177
Q3UHB8	kSHsLDSLSR.Q3UHB8	3	kSHsLDSLSR	9.84e-06	6.15599	6.10134	6.14449	6.03691	6.11297	6.60809	6.36126	6.54499	6.78275	6.96781	6.68255	7.24088	7.56841	7.40735	7.51132	7.30364	7.29059	7.31781	7.83275	7.98535	[R].KSHSLDSLSR.[R]	1xPhospho [S4]; 1xTMTpro [K1]; 1xTMTpro [N-Term]	Q3UHB8 [228-237]	Q3UHB8 1xPhospho [S231]	1	____KSHsLDSLSR_	Ccdc177
Q3UHB8	SFSLGDLSHsPQTAQHVER.Q3UHB8	3	SFSLGDLSHsPQTAQHVER	0.00285651	6.03453	6.11367	6.03354	5.69044	6.50912	6.36334	6.42486	6.50188	6.32011	6.26021	6.40328	6.57561	6.80332	6.81196	7.30411	6.51618	6.648	6.71855	7.00951	7.27786	[R].SFSLGDLSHSPQTAQHVER.[I]	1xPhospho [S10]; 1xTMTpro [N-Term]	Q3UHB8 [301-319]	Q3UHB8 1xPhospho [S310]	1	SLGDLSHsPQTAQHV	Ccdc177
Q3UHC7	LPsPTPENk.Q3UHC7	NA	LPsPTPENk	0.590862	5.35184	5.00032	5.413	5.31652	5.08102	4.87244	5.31378	5.54346	5.45698	4.7629	4.85315	4.80083	5.29202	5.13678	5.27162	4.95801	5.20917	4.8488	5.16953	5.04912	[R].LPSPTPENK.[D]	1xPhospho [S3]; 1xTMTpro [K9]; 1xTMTpro [N-Term]	Q3UHC7 [700-708]	Q3UHC7 1xPhospho [S702]	1	_____LPsPTPENK_	Dab2ip
Q3UHC7	GDsPELkPR.Q3UHC7	NA	GDsPELkPR	0.255518	6.50581	6.27937	6.68882	5.91628	6.0438	6.18574	6.81252	7.38764	6.93812	6.60503	6.27013	6.12084	7.03827	6.78445	7.04229	6.64788	6.5101	6.23786	6.94263	6.86303	[K].GDSPELKPR.[A]	1xPhospho [S3]; 1xTMTpro [K7]; 1xTMTpro [N-Term]	Q3UHC7 [976-984]	Q3UHC7 1xPhospho [S978]	1	_____GDsPELKPR_	Dab2ip
Q3UHC7	SLsmVDLQDAR.Q3UHC7	5	SLsmVDLQDAR	0.000321417	8.15834	8.1112	8.30572	8.41984	8.4547	8.02379	7.85192	7.847	7.98173	8.15257	8.07511	7.59299	7.91297	7.98607	7.63278	7.42625	7.50961	7.48863	7.59864	7.90725	[K].SLSMVDLQDAR.[T]	1xPhospho [S3]; 1xOxidation [M4]; 1xTMTpro [N-Term]	Q3UHC7 [745-755]	Q3UHC7 1xPhospho [S747]	1	_____SLsMVDLQDA	Dab2ip
Q3UHC7	QGPSPVsPNALDR.Q3UHC7	NA	QGPSPVsPNALDR	0.342431	8.05799	7.96033	8.27911	8.36008	8.18197	8.25391	8.13163	8.21759	8.33238	8.41839	8.3509	7.98066	8.37677	8.4792	8.01745	8.0748	7.93754	7.89646	8.23213	8.24353	[K].QGPSPVSPNALDR.[T]	1xPhospho [S7]; 1xTMTpro [N-Term]	Q3UHC7 [989-1001]	Q3UHC7 1xPhospho [S995]	1	_QGPSPVsPNALDR_	Dab2ip
Q3UHC7	LPsPTPENkDLFFVTR.Q3UHC7	2	LPsPTPENkDLFFVTR	0.0150825	5.41583	5.04044	4.99629	5.06075	4.64356	5.04492	5.5712	5.61311	5.3713	5.19307	5.27178	4.65734	5.01032	5.36724	5.23779	4.70435	4.46281	4.49579	5.01763	4.84509	[R].LPSPTPENKDLFFVTR.[S]	1xPhospho [S3]; 1xTMTpro [K9]; 1xTMTpro [N-Term]	Q3UHC7 [700-715]	Q3UHC7 1xPhospho [S702]	1	_____LPsPTPENKD	Dab2ip
Q3UHC7	QNsAGPQR.Q3UHC7	8	QNsAGPQR	0.00758012	3.84028	3.8751	3.68731	4.72343	4.22247	4.72139	4.12926	3.99356	4.64959	4.42524	4.44493	4.77039	5.07952	5.64323	5.1224	4.27419	4.47859	4.24925	4.40968	4.06848	[R].QNSAGPQR.[R]	1xPhospho [S3]; 1xTMTpro [N-Term]	Q3UHC7 [908-915]	Q3UHC7 1xPhospho [S910]	1	_____QNsAGPQR__	Dab2ip
Q3UHD3	QLsEEHAVkR.Q3UHD3	5	QLsEEHAVkR	0.000387967	6.13644	6.31961	6.47908	6.19511	6.76988	6.35295	6.094	5.58055	6.35304	6.53433	5.4836	5.80428	6.10791	5.71047	5.81924	4.94047	5.58962	5.37034	5.37228	5.44637	[R].QLSEEHAVKR.[G]	1xPhospho [S3]; 1xTMTpro [K9]; 1xTMTpro [N-Term]	Q3UHD3 [107-116]	Q3UHD3 1xPhospho [S109]	1	_____QLsEEHAVKR	Mtus2
Q3UHD3	SmsPVER.Q3UHD3	5	SmsPVER	0.000683398	5.48963	5.25126	5.70486	6.14451	5.03693	5.33019	5.45891	5.60652	5.66867	5.29806	4.66901	4.39475	5.19675	5.20885	5.04698	4.58561	4.47369	4.74955	4.5868	4.52468	[R].SMSPVER.[Q]	1xPhospho [S3]; 1xOxidation [M2]; 1xTMTpro [N-Term]	Q3UHD3 [330-336]	Q3UHD3 1xPhospho [S332]	1	_____SMsPVER___	Mtus2
Q3UHD6	IVkSEsGYGFNVR.Q3UHD6	6	IVkSEsGYGFNVR	0.00821425	7.15726	7.24941	7.27416	7.40831	7.72826	7.16478	6.59692	6.2294	6.84991	7.6391	7.53689	7.96751	7.35871	7.20587	7.55812	7.70503	7.66043	7.94018	7.66184	8.14369	[R].IVKSESGYGFNVR.[G]	1xPhospho [S6]; 1xTMTpro [K3]; 1xTMTpro [N-Term]	Q3UHD6 [44-56]	Q3UHD6 1xPhospho [S49]	1	__IVKSEsGYGFNVR	Snx27
Q3UHD9	AEAAAVAGLSTPGsLHR.Q3UHD9	1	AEAAAVAGLSTPGsLHR	3.73e-05	6.80838	6.74296	7.23813	7.18971	7.14307	6.65672	6.27209	6.24214	6.73403	6.67943	6.33128	6.1642	6.41784	6.28699	6.2876	6.09914	6.21251	6.10392	6.31254	6.22781	[R].AEAAAVAGLSTPGSLHR.[A]	1xPhospho [S14]; 1xTMTpro [N-Term]	Q3UHD9 [619-635]	Q3UHD9 1xPhospho [S632]	1	AGLSTPGsLHR____	Agap2
Q3UHD9	RGsDAEk.Q3UHD9	NA	RGsDAEk	0.302289	5.95069	6.13182	6.03079	6.67294	6.30941	5.49173	5.69496	6.2322	6.24107	5.87205	5.6142	6.30466	6.74132	6.52941	6.20342	5.96254	6.10091	5.8674	6.09807	6.24841	[R].RGSDAEK.[R]	1xPhospho [S3]; 1xTMTpro [K7]; 1xTMTpro [N-Term]	Q3UHD9 [648-654]	Q3UHD9 1xPhospho [S650]	1	_____RGsDAEK___	Agap2
Q3UHD9	LRTDsQSEAVAIQAIR.Q3UHD9	3	LRTDsQSEAVAIQAIR	6.42e-05	6.55408	6.8438	6.92042	7.19199	7.3061	7.10261	6.82175	7.22907	7.20112	7.31774	7.67412	7.8258	7.89839	7.92996	7.76855	7.52945	7.59036	7.5233	7.9724	7.89846	[K].LRTDSQSEAVAIQAIR.[N]	1xPhospho [S5]; 1xTMTpro [N-Term]	Q3UHD9 [917-932]	Q3UHD9 1xPhospho [S921]	1	___LRTDsQSEAVAI	Agap2
Q3UHD9	SFGsLR.Q3UHD9	7	SFGsLR	0.0507248	6.29836	6.16588	6.72054	6.33646	5.70559	6.5682	7.27674	7.25507	7.30517	7.09062	5.97712	6.04955	7.41415	6.57707	7.24396	6.47641	6.61471	6.18204	6.6204	6.69176	[K].SFGSLR.[N]	1xPhospho [S4]; 1xTMTpro [N-Term]	Q3UHD9 [856-861]	Q3UHD9 1xPhospho [S859]	1	____SFGsLR_____	Agap2
Q3UHD9	TDsQSEAVAIQAIR.Q3UHD9	6	TDsQSEAVAIQAIR	0.00855945	5.48179	5.37055	5.57307	6.04695	5.7581	5.12747	4.90176	4.91007	5.27017	5.33967	5.17818	5.36972	5.39017	5.233	5.23337	5.29423	5.32266	5.33032	5.50695	5.81261	[R].TDSQSEAVAIQAIR.[N]	1xPhospho [S3]; 1xTMTpro [N-Term]	Q3UHD9 [919-932]	Q3UHD9 1xPhospho [S921]	1	_____TDsQSEAVAI	Agap2
Q3UHD9	GSEPRDPGsPR.Q3UHD9	3	GSEPRDPGsPR	0.0401899	4.2688	4.52945	4.60698	4.97218	4.98338	4.31583	4.32543	4.92095	4.40025	4.89138	4.95561	4.53814	5.29811	5.83016	4.98868	5.14365	4.9566	5.02526	5.24448	5.22468	[R].GSEPRDPGSPR.[G]	1xPhospho [S9]; 1xTMTpro [N-Term]	Q3UHD9 [46-56]	Q3UHD9 1xPhospho [S54]	1	SEPRDPGsPR_____	Agap2
Q3UHD9	RGsDAEkR.Q3UHD9	8	RGsDAEkR	0.0014703	5.89696	6.20236	6.31014	6.59961	6.21831	6.4866	6.3888	6.57102	6.6746	6.88577	6.73255	6.71367	7.18003	7.24051	7.09855	6.43078	6.37982	6.52272	6.7557	6.67657	[R].RGSDAEKR.[S]	1xPhospho [S3]; 1xTMTpro [K7]; 1xTMTpro [N-Term]	Q3UHD9 [648-655]	Q3UHD9 1xPhospho [S650]	1	_____RGsDAEKR__	Agap2
Q3UHD9	DPGsPR.Q3UHD9	NA	DPGsPR	0.39684	6.35967	6.39261	6.6436	6.65424	5.78415	5.49444	5.86671	7.2466	6.2902	5.55668	6.16869	6.02282	7.32368	7.29276	6.51037	6.47376	6.32411	6.04128	7.32954	7.10109	[R].DPGSPR.[G]	1xPhospho [S4]; 1xTMTpro [N-Term]	Q3UHD9 [51-56]	Q3UHD9 1xPhospho [S54]	1	____DPGsPR_____	Agap2
Q3UHD9	GkLsPR.Q3UHD9	4	GkLsPR	0.845239	6.48937	6.73662	6.70777	6.98512	6.69968	6.47981	6.4499	6.83708	6.87781	6.85053	6.80317	6.4195	7.42188	7.23988	6.43163	6.67252	6.3788	6.71222	7.15029	7.10849	[R].GKLSPR.[K]	1xPhospho [S4]; 1xTMTpro [K2]; 1xTMTpro [N-Term]	Q3UHD9 [259-264]	Q3UHD9 1xPhospho [S262]	1	____GKLsPR_____	Agap2
Q3UHH1	RLsAEGGDk.Q3UHH1	7	RLsAEGGDk	0.00171823	5.55445	5.03401	5.74357	5.60476	5.8723	6.38461	6.93299	6.86058	6.51674	6.40712	5.91862	5.27691	6.24776	6.10592	6.0439	6.06829	5.79181	5.08286	5.86973	5.8113	[R].RLSAEGGDK.[A]	1xPhospho [S3]; 1xTMTpro [K9]; 1xTMTpro [N-Term]	Q3UHH1 [562-570]	Q3UHH1 1xPhospho [S564]	1	_____RLsAEGGDK_	Zswim8
Q3UHJ0	VQTtPPPTIQGQk.Q3UHJ0	3	VQTtPPPTIQGQk	5.53e-06	7.42037	7.26198	7.33435	7.38826	7.24946	7.57208	7.56684	7.67522	7.76698	7.9847	7.94398	8.11846	8.22816	8.2041	8.52267	8.28483	8.21095	8.21547	8.65926	8.80722	[K].VQTTPPPTIQGQK.[V]	1xPhospho [T4]; 1xTMTpro [K13]; 1xTMTpro [N-Term]	Q3UHJ0 [601-613]	Q3UHJ0 1xPhospho [T604]	1	____VQTtPPPTIQG	Aak1
Q3UHJ0	VGSLtPPSsPkTQR.Q3UHJ0	6	VGSLtPPSsPkTQR	0.0294625	6.17099	6.37081	6.53152	7.21275	7.17324	6.53351	6.14447	6.21295	6.62749	6.92976	6.9777	7.19591	6.81291	6.87428	6.57128	7.12008	7.12969	7.25677	7.13729	7.20049	[K].VGSLTPPSSPKTQR.[A]	2xPhospho [T5; S9]; 1xTMTpro [K11]; 1xTMTpro [N-Term]	Q3UHJ0 [614-627]	Q3UHJ0 2xPhospho [T618; S622]	2	___VGSLtPPSsPKT	Aak1
Q3UHJ0	ILsDVTHSAVFGVPASk.Q3UHJ0	3	ILsDVTHSAVFGVPASk	7.48e-05	4.30227	4.4282	4.21283	4.02798	4.36037	4.19147	4.70242	4.28072	4.72805	4.73866	4.68601	4.60845	5.02967	4.98153	4.93756	5.30238	4.95108	5.14507	5.71043	5.4777	[R].ILSDVTHSAVFGVPASK.[S]	1xPhospho [S3]; 1xTMTpro [K17]; 1xTMTpro [N-Term]	Q3UHJ0 [633-649]	Q3UHJ0 1xPhospho [S635]	1	_____ILsDVTHSAV	Aak1
Q3UHK6	ELGLGEmtPPHGTLYR.Q3UHK6	6	ELGLGEmtPPHGTLYR	0.150368	6.05823	6.16304	6.26013	5.907	6.72246	5.90704	5.59718	5.80183	6.09745	6.19229	6.14789	6.10929	6.0446	6.16905	6.33101	6.06634	6.10029	6.32196	6.1857	6.42439	[R].ELGLGEMTPPHGTLYR.[T]	1xPhospho [T8]; 1xOxidation [M7]; 1xTMTpro [N-Term]	Q3UHK6 [82-97]	Q3UHK6 1xPhospho [T89]	1	ELGLGEMtPPHGTLY	Tenm4
Q3UHL1	AAAtPEPAVAQPDSTALEGATGQAPPSSk.Q3UHL1	NA	AAAtPEPAVAQPDSTALEGATGQAPPSSk	0.399499	4.98286	5.54732	5.7283	5.85117	5.77265	5.50256	5.5663	5.84741	5.51961	5.49177	5.3994	5.29009	5.40081	5.41962	5.57476	4.85473	5.03381	5.38404	5.68563	5.65295	[K].AAATPEPAVAQPDSTALEGATGQAPPSSK.[G]	1xPhospho [T4]; 1xTMTpro [K29]; 1xTMTpro [N-Term]	Q3UHL1 [467-495]	Q3UHL1 1xPhospho [T470]	1	____AAAtPEPAVAQ	Camkv
Q3UHL1	SAtPATDGR.Q3UHL1	1	SAtPATDGR	0.109346	5.33526	4.94994	5.91328	5.98976	6.01122	5.19647	5.85478	6.20274	4.61685	4.81456	5.22395	3.96973	5.43029	5.21323	4.78386	4.62471	4.38819	3.92658	5.40536	5.12946	[R].SATPATDGR.[A]	1xPhospho [T3]; 1xTMTpro [N-Term]	Q3UHL1 [436-444]	Q3UHL1 1xPhospho [T438]	1	_____SAtPATDGR_	Camkv
Q3UKC1	kLEGQsPQQVSR.Q3UKC1	5	kLEGQsPQQVSR	0.010433	6.92798	7.14784	7.01711	7.11423	7.14941	6.68179	6.60896	6.84725	6.75112	6.93187	6.98734	6.88771	6.68167	6.96092	6.63827	6.48286	6.70045	6.71002	6.90896	6.8495	[R].KLEGQSPQQVSR.[C]	1xPhospho [S6]; 1xTMTpro [K1]; 1xTMTpro [N-Term]	Q3UKC1 [627-638]	Q3UKC1 1xPhospho [S632]	1	__KLEGQsPQQVSR_	Tax1bp1
Q3UL36	ASsPPDR.Q3UL36	6	ASsPPDR	0.196921	6.77567	6.69831	6.56507	6.91244	6.29362	5.68988	5.92199	6.40621	6.24346	5.78093	5.58831	6.179	6.64806	7.76521	6.44971	6.24187	6.30276	6.41687	6.57166	6.49787	[R].ASSPPDR.[I]	1xPhospho [S3]; 1xTMTpro [N-Term]	Q3UL36 [73-79]	Q3UL36 1xPhospho [S75]	1	_____ASsPPDR___	Arglu1
Q3UMB5	GSISSGEsIEVLGTEk.Q3UMB5	6	GSISSGEsIEVLGTEk	0.168293	4.53483	4.60752	4.89803	4.94105	4.71207	4.20093	4.10611	4.41986	4.6591	4.54675	4.51693	4.73366	4.78105	4.27905	4.44298	4.23867	4.59302	4.49993	4.98454	4.68434	[K].GSISSGESIEVLGTEK.[S]	1xPhospho [S8]; 1xTMTpro [K16]; 1xTMTpro [N-Term]	Q3UMB5 [463-478]	Q3UMB5 1xPhospho [S470]	1	GSISSGEsIEVLGTE	Smcr8
Q3UMB5	VAsPANVGTLHTLSR.Q3UMB5	3	VAsPANVGTLHTLSR	0.0026061	7.02769	7.03296	7.07955	7.19038	6.99665	7.19783	7.02718	7.00943	7.24253	7.47128	7.28183	7.28042	7.42285	7.56586	7.53358	7.55569	7.30448	7.33637	7.78431	7.60856	[R].VASPANVGTLHTLSR.[Y]	1xPhospho [S3]; 1xTMTpro [N-Term]	Q3UMB5 [786-800]	Q3UMB5 1xPhospho [S788]	1	_____VAsPANVGTL	Smcr8
Q3UMR0	RPRPSEVPAQsPTR.Q3UMR0	8	RPRPSEVPAQsPTR	0.0402714	2.58928	2.84645	2.20106	3.35491	2.68105	2.37613	2.57505	3.58978	3.22162	2.91795	3.1095	3.06025	3.63729	4.11226	3.95638	2.96742	3.09539	2.88841	3.14116	3.17104	[R].RPRPSEVPAQSPTR.[S]	1xPhospho [S11]; 1xTMTpro [N-Term]	Q3UMR0 [624-637]	Q3UMR0 1xPhospho [S634]	1	PSEVPAQsPTR____	Ankrd27
Q3UMR0	DRsVPDLAGR.Q3UMR0	6	DRsVPDLAGR	0.0675551	3.68422	3.81055	3.58891	4.33036	4.22083	3.64085	3.47658	3.52282	3.39516	3.26864	3.96871	4.17218	3.8592	4.07982	3.86401	3.04382	3.35934	4.15421	3.92134	3.95468	[R].DRSVPDLAGR.[S]	1xPhospho [S3]; 1xTMTpro [N-Term]	Q3UMR0 [959-968]	Q3UMR0 1xPhospho [S961]	1	_____DRsVPDLAGR	Ankrd27
Q3UNH4	APsPAPRPPSR.Q3UNH4	5	APsPAPRPPSR	1.45e-06	6.44877	6.45931	6.62869	6.79699	6.54801	6.19049	6.35638	6.50714	6.62338	6.21328	5.74185	5.38295	5.83214	6.06406	5.8526	5.09372	5.42094	5.55503	5.23942	5.48794	[R].APSPAPRPPSR.[R]	1xPhospho [S3]; 1xTMTpro [N-Term]	Q3UNH4 [762-772]	Q3UNH4 1xPhospho [S764]	1	_____APsPAPRPPS	Gprin1
Q3UNH4	APsWDAGAPPPR.Q3UNH4	NA	APsWDAGAPPPR	0.285254	4.02065	4.03073	4.28426	4.91532	4.6598	4.11361	4.09001	4.538	4.50938	4.00315	3.68974	4.49163	4.27062	4.34738	4.36935	3.94389	4.19584	3.80882	3.92411	4.11312	[K].APSWDAGAPPPR.[E]	1xPhospho [S3]; 1xTMTpro [N-Term]	Q3UNH4 [712-723]	Q3UNH4 1xPhospho [S714]	1	_____APsWDAGAPP	Gprin1
Q3UNH4	kTDPEFSGkLtPGSSGk.Q3UNH4	2	kTDPEFSGkLtPGSSGk	2.6e-05	5.9689	5.49355	6.21596	6.04666	5.67798	5.90876	6.3222	6.7507	6.60363	6.34559	5.02999	4.99345	5.57708	5.88732	5.78008	4.92243	4.51153	5.05663	4.62286	4.50881	[K].KTDPEFSGKLTPGSSGK.[T]	1xPhospho [T11]; 3xTMTpro [K1; K9; K17]; 1xTMTpro [N-Term]	Q3UNH4 [246-262]	Q3UNH4 1xPhospho [T256]	1	PEFSGKLtPGSSGK_	Gprin1
Q3UNH4	NSELVsPVkPER.Q3UNH4	5	NSELVsPVkPER	4.57e-05	7.46197	7.53087	6.91892	7.02448	7.2958	7.24352	7.50231	7.24481	7.26622	7.32714	6.79535	6.13673	6.27138	6.6084	6.45134	5.2652	5.37004	5.51898	6.52945	6.33773	[R].NSELVSPVKPER.[L]	1xPhospho [S6]; 1xTMTpro [K9]; 1xTMTpro [N-Term]	Q3UNH4 [364-375]	Q3UNH4 1xPhospho [S369]	1	__NSELVsPVKPER_	Gprin1
Q3UNH4	sPSAEAAAPPPGPR.Q3UNH4	1	sPSAEAAAPPPGPR	0.000792637	5.62406	6.07506	6.32657	6.21048	5.87428	5.53895	5.13743	5.16542	5.79211	5.65782	5.33406	5.27888	5.27026	5.40594	5.51067	5.16281	5.22003	5.36281	5.36748	5.4372	[K].SPSAEAAAPPPGPR.[T]	1xPhospho [S1]; 1xTMTpro [N-Term]	Q3UNH4 [691-704]	Q3UNH4 1xPhospho [S691]	1	_______sPSAEAAA	Gprin1
Q3UNH4	SVATGPmtPQAAAPPAVPPVFPEVR.Q3UNH4	5	SVATGPmtPQAAAPPAVPPVFPEVR	0.00129503	4.57954	5.13527	4.35886	4.59944	4.78803	4.33927	4.50458	3.82553	4.51929	4.71625	3.98865	4.13659	3.8076	4.13872	4.35483	3.44343	3.39161	2.84441	3.93582	4.05032	[R].SVATGPMTPQAAAPPAVPPVFPEVR.[V]	1xPhospho [T8]; 1xOxidation [M7]; 1xTMTpro [N-Term]	Q3UNH4 [788-812]	Q3UNH4 1xPhospho [T795]	1	SVATGPMtPQAAAPP	Gprin1
Q3UNH4	RERPGsTGEGDLVSLR.Q3UNH4	NA	RERPGsTGEGDLVSLR	0.197433	5.45148	5.4816	5.60648	5.45221	6.35633	5.30281	5.47157	5.32609	5.5448	5.12936	5.20546	5.29541	4.84088	5.36826	5.70509	5.4276	5.12711	5.32536	5.29736	5.63673	[R].RERPGSTGEGDLVSLR.[E]	1xPhospho [S6]; 1xTMTpro [N-Term]	Q3UNH4 [214-229]	Q3UNH4 1xPhospho [S219]	1	__RERPGsTGEGDLV	Gprin1
Q3UNH4	AETVsPGEVDAmTLGk.Q3UNH4	5	AETVsPGEVDAmTLGk	1.58e-06	7.96862	7.83242	8.25292	8.11046	8.00666	7.77241	8.2618	8.06187	8.53169	8.23549	7.44599	7.24318	7.3381	7.64154	7.60898	6.95262	7.14854	7.02567	6.92696	7.0791	[K].AETVSPGEVDAMTLGK.[T]	1xPhospho [S5]; 1xOxidation [M12]; 1xTMTpro [K16]; 1xTMTpro [N-Term]	Q3UNH4 [491-506]	Q3UNH4 1xPhospho [S495]	1	___AETVsPGEVDAM	Gprin1
Q3UNH4	kAsLPASEk.Q3UNH4	2	kAsLPASEk	0.000890285	6.12288	5.34842	5.92318	5.70126	5.74278	6.26816	6.55047	6.08439	6.56724	6.2506	5.49723	5.36642	5.911	5.47966	5.67261	4.92332	5.33726	5.0577	5.78517	5.69945	[K].KASLPASEK.[T]	1xPhospho [S3]; 2xTMTpro [K1; K9]; 1xTMTpro [N-Term]	Q3UNH4 [466-474]	Q3UNH4 1xPhospho [S468]	1	_____KAsLPASEK_	Gprin1
Q3UNH4	RERPGsTGEGDLVSLRENDmkPPDNTDSASTk.Q3UNH4	5	RERPGsTGEGDLVSLRENDmkPPDNTDSASTk	0.000124321	5.33427	5.69557	5.38342	5.10801	5.51653	5.18176	4.9838	4.45374	5.0159	5.32497	5.34774	4.85148	4.63897	4.82322	4.67931	3.26577	4.25541	3.83026	4.43822	3.98454	[R].RERPGSTGEGDLVSLRENDMKPPDNTDSASTK.[K]	1xPhospho [S6]; 1xOxidation [M20]; 2xTMTpro [K21; K32]; 1xTMTpro [N-Term]	Q3UNH4 [214-245]	Q3UNH4 1xPhospho [S219]	1	__RERPGsTGEGDLV	Gprin1
Q3UNH4	ERPGsTGEGDLVSLR.Q3UNH4	NA	ERPGsTGEGDLVSLR	0.0858535	7.87774	7.71597	8.00325	7.86059	7.78769	7.66625	8.42153	8.75169	8.53487	8.14184	7.93171	7.62632	8.33663	8.48293	8.56255	8.03441	7.90053	7.59731	7.96375	7.76067	[R].ERPGSTGEGDLVSLR.[E]	1xPhospho [S5]; 1xTMTpro [N-Term]	Q3UNH4 [215-229]	Q3UNH4 1xPhospho [S219]	1	___ERPGsTGEGDLV	Gprin1
Q3UPL0	EQTLsPTIINGLHSIAR.Q3UPL0	6	EQTLsPTIINGLHSIAR	0.012635	4.7955	4.17839	4.95377	4.73365	4.87607	4.13191	4.2064	3.98629	4.31231	4.45212	4.12308	4.30331	4.14439	4.23466	4.10724	3.95352	4.50899	4.31703	4.49226	4.63349	[R].EQTLSPTIINGLHSIAR.[S]	1xPhospho [S5]; 1xTMTpro [N-Term]	Q3UPL0 [1169-1185]	Q3UPL0 1xPhospho [S1173]	1	___EQTLsPTIINGL	Sec31a
Q3USB7	TVsFSSmPSEk.Q3USB7	NA	TVsFSSmPSEk	0.48956	4.8011	5.43743	5.37138	5.23573	5.54263	5.12373	5.13303	4.96737	5.17586	5.19992	5.02848	5.10587	4.98558	5.22355	5.30114	5.20018	5.12455	5.0378	5.19075	5.26712	[K].TVSFSSMPSEK.[K]	1xPhospho [S3]; 1xOxidation [M7]; 1xTMTpro [K11]; 1xTMTpro [N-Term]	Q3USB7 [94-104]	Q3USB7 1xPhospho [S96]	1	_____TVsFSSMPSE	Plcl1
Q3USB7	kLPSESDLLEGEVtDEDEEAEmSR.Q3USB7	5	kLPSESDLLEGEVtDEDEEAEmSR	0.00439679	6.03244	6.14694	6.09882	5.77289	5.68628	5.87222	5.79533	5.78508	5.97211	5.84242	5.61239	5.48726	5.93644	5.76816	5.78561	5.42065	5.33896	5.49701	5.66273	5.62335	[K].KLPSESDLLEGEVTDEDEEAEMSR.[R]	1xPhospho [T14]; 1xOxidation [M22]; 1xTMTpro [K1]; 1xTMTpro [N-Term]	Q3USB7 [544-567]	Q3USB7 1xPhospho [T557]	1	DLLEGEVtDEDEEAE	Plcl1
Q3USB7	RmsGDYNGEQk.Q3USB7	8	RmsGDYNGEQk	0.00830024	5.64241	5.51738	5.9059	6.13522	6.01028	5.80231	5.73304	5.79367	5.94769	5.99451	6.0265	5.90587	6.40047	6.46018	6.16934	5.73288	5.41832	5.61795	5.7428	5.77207	[R].RMSGDYNGEQK.[H]	1xPhospho [S3]; 1xOxidation [M2]; 1xTMTpro [K11]; 1xTMTpro [N-Term]	Q3USB7 [568-578]	Q3USB7 1xPhospho [S570]	1	_____RMsGDYNGEQ	Plcl1
Q3UTJ2	VQsSPNLLAAGR.Q3UTJ2	5	VQsSPNLLAAGR	0.00315811	7.02816	6.87552	6.93892	7.30383	7.11536	6.72986	6.73695	6.30743	7.01757	6.99866	7.04896	6.96692	7.06771	7.06696	6.88945	6.57112	6.57009	6.27911	6.53279	6.71052	[R].VQSSPNLLAAGR.[E]	1xPhospho [S3]; 1xTMTpro [N-Term]	Q3UTJ2 [25-36]	Q3UTJ2 1xPhospho [S27]	1	_____VQsSPNLLAA	Sorbs2
Q3UTJ2	RRGsLPDNSILHR.Q3UTJ2	8	RRGsLPDNSILHR	0.0205936	4.65697	4.74618	4.92582	4.97303	5.44593	4.99321	4.8932	5.0657	5.16149	5.57672	5.45926	5.50896	5.45387	5.71602	5.26807	5.17658	5.12656	5.16017	5.31557	5.34897	[K].RRGSLPDNSILHR.[L]	1xPhospho [S4]; 1xTMTpro [N-Term]	Q3UTJ2 [826-838]	Q3UTJ2 1xPhospho [S829]	1	____RRGsLPDNSIL	Sorbs2
Q3UTJ2	GAEDYPDPPLPHSYsSDR.Q3UTJ2	8	GAEDYPDPPLPHSYsSDR	0.031086	6.16626	6.36787	6.80043	6.27826	6.44353	6.21964	6.45007	6.64634	6.44478	6.48576	6.31104	6.33874	6.71734	6.80816	6.67235	6.04144	6.15907	6.1698	6.21927	6.2081	[K].GAEDYPDPPLPHSYSSDR.[I]	1xPhospho [S15]; 1xTMTpro [N-Term]	Q3UTJ2 [1083-1100]	Q3UTJ2 1xPhospho [S1097]	1	PPLPHSYsSDR____	Sorbs2
Q3UTJ2	RGsLPDNSILHR.Q3UTJ2	2	RGsLPDNSILHR	6.31e-07	8.5971	8.25061	8.45339	8.3914	8.34561	8.2864	8.4133	8.24996	8.49995	8.50692	8.02513	7.80571	8.1817	8.30992	8.00828	7.23984	7.32974	7.44033	7.61627	7.5113	[R].RGSLPDNSILHR.[L]	1xPhospho [S3]; 1xTMTpro [N-Term]	Q3UTJ2 [827-838]	Q3UTJ2 1xPhospho [S829]	1	_____RGsLPDNSIL	Sorbs2
Q3UTJ2	RVQsSPNLLAAGR.Q3UTJ2	5	RVQsSPNLLAAGR	9.82e-05	6.6171	6.46255	6.74615	6.68687	6.98401	6.38288	6.33078	6.01355	6.58795	6.53772	6.45802	6.41342	6.19111	6.16527	6.11013	5.81864	5.96308	5.8774	5.98248	5.93821	[K].RVQSSPNLLAAGR.[E]	1xPhospho [S4]; 1xTMTpro [N-Term]	Q3UTJ2 [24-36]	Q3UTJ2 1xPhospho [S27]	1	____RVQsSPNLLAA	Sorbs2
Q3UTJ2	RksEPAVGPLR.Q3UTJ2	4	RksEPAVGPLR	1.45e-06	7.71186	7.69861	7.7722	7.876	7.79084	8.40457	8.36603	8.59485	8.5189	8.77441	8.97367	8.79729	9.13656	9.36728	9.19133	8.36255	8.45877	8.43751	8.77963	8.9708	[R].RKSEPAVGPLR.[G]	1xPhospho [S3]; 1xTMTpro [K2]; 1xTMTpro [N-Term]	Q3UTJ2 [337-347]	Q3UTJ2 1xPhospho [S339]	1	_____RKsEPAVGPL	Sorbs2
Q3UTQ8	NLSEGNNANYTEyVATR.Q3UTQ8	5	NLSEGNNANYTEyVATR	0.0471432	5.11571	5.09744	5.35519	5.4257	5.21269	4.78319	4.67509	4.80137	5.24746	4.93052	4.89165	5.00427	5.10328	4.95579	4.98409	4.37983	4.83807	4.67076	5.22999	5.01617	[R].NLSEGNNANYTEYVATR.[W]	1xPhospho [Y13]; 1xTMTpro [N-Term]	Q3UTQ8 [159-175]	Q3UTQ8 1xPhospho [Y171]	1	NNANYTEyVATR___	Cdkl5
Q3UTQ8	LLDRsPSR.Q3UTQ8	NA	LLDRsPSR	0.480132	5.9334	6.11458	6.2963	6.76786	6.88548	6.36056	6.23841	6.35074	5.89229	6.46189	6.58072	6.13689	7.26604	6.81472	6.21222	6.38948	6.2181	6.35179	7.23839	6.83553	[R].LLDRSPSR.[S]	1xPhospho [S5]; 1xTMTpro [N-Term]	Q3UTQ8 [302-309]	Q3UTQ8 1xPhospho [S306]	1	___LLDRsPSR____	Cdkl5
Q3UTQ8	DLTNNNIPHLLsPk.Q3UTQ8	NA	DLTNNNIPHLLsPk	0.728019	3.05113	2.86048	3.31827	2.40501	3.47437	3.12553	3.30221	3.33604	3.11321	3.50267	3.14115	2.03259	3.92981	3.48504	2.8515	3.20367	3.00982	3.30088	3.41151	3.48418	[K].DLTNNNIPHLLSPK.[E]	1xPhospho [S12]; 1xTMTpro [K14]; 1xTMTpro [N-Term]	Q3UTQ8 [396-409]	Q3UTQ8 1xPhospho [S407]	1	NNIPHLLsPK_____	Cdkl5
Q3UU96	TVFSGSVsIPSITk.Q3UU96	NA	TVFSGSVsIPSITk	0.386315	3.182	3.67864	4.30348	4.46196	3.26521	3.71887	3.82673	3.01491	4.52499	4.0686	4.12264	3.50924	3.46225	4.1112	4.06342	3.19854	3.35154	3.33649	3.71837	3.36985	[R].TVFSGSVSIPSITK.[S]	1xPhospho [S8]; 1xTMTpro [K14]; 1xTMTpro [N-Term]	Q3UU96 [1593-1606]	Q3UU96 1xPhospho [S1600]	1	TVFSGSVsIPSITK_	Cdc42bpa
Q3UU96	SmsASSGLSAR.Q3UU96	2	SmsASSGLSAR	3.62e-05	6.08678	6.29474	6.44221	6.3057	6.37592	6.71113	6.59124	6.15072	6.8395	6.79395	6.86938	6.67876	6.68623	6.77041	6.56663	5.8034	5.83003	5.94918	6.10275	5.82829	[R].SMSASSGLSAR.[S]	1xPhospho [S3]; 1xOxidation [M2]; 1xTMTpro [N-Term]	Q3UU96 [1614-1624]	Q3UU96 1xPhospho [S1616]	1	_____SMsASSGLSA	Cdc42bpa
Q3UU96	EFsGGSYNTk.Q3UU96	2	EFsGGSYNTk	0.0295487	6.78302	6.88841	6.96446	7.12313	7.31632	7.16928	7.10308	7.21385	7.59911	7.58286	7.36657	7.09124	7.47944	7.58304	7.2545	7.10229	7.01964	7.11442	6.79075	7.13762	[R].EFSGGSYNTK.[R]	1xPhospho [S3]; 1xTMTpro [K10]; 1xTMTpro [N-Term]	Q3UU96 [1636-1645]	Q3UU96 1xPhospho [S1638]	1	_____EFsGGSYNTK	Cdc42bpa
Q3UVC0	LkPPGtPPPSSR.Q3UVC0	5	LkPPGtPPPSSR	0.0175309	5.7863	6.02241	5.89351	5.70481	5.68608	5.81719	5.63023	5.68737	5.8283	5.7578	5.80835	5.39435	5.83855	5.81373	5.78161	5.11864	5.36254	5.1016	5.68305	5.67435	[K].LKPPGTPPPSSR.[K]	1xPhospho [T6]; 1xTMTpro [K2]; 1xTMTpro [N-Term]	Q3UVC0 [286-297]	Q3UVC0 1xPhospho [T291]	1	__LKPPGtPPPSSR_	Ksr2
Q3UVL4	kAQsSDSSkR.Q3UVL4	3	kAQsSDSSkR	3.41e-06	6.52342	6.53115	6.95692	6.74788	6.70261	7.28634	7.28747	7.1705	7.56294	7.80164	7.50675	7.47633	7.31893	7.5109	7.71934	7.74299	7.64691	7.78632	7.81431	7.7973	[R].KAQSSDSSKR.[T]	1xPhospho [S4]; 2xTMTpro [K1; K9]; 1xTMTpro [N-Term]	Q3UVL4 [637-646]	Q3UVL4 1xPhospho [S640]	1	____KAQsSDSSKR_	Vps51
Q3UVX5	DYTQSSSsL.Q3UVX5	1	DYTQSSSsL	7.27e-05	6.78127	6.5481	6.8646	6.82196	7.07019	6.57579	6.44445	6.13149	6.85042	6.75233	6.03535	6.14997	6.32287	6.04201	5.93457	5.94558	5.89106	5.97084	6.13214	6.16929	[R].DYTQSSSSL.[-]	1xPhospho [S8]; 1xTMTpro [N-Term]	Q3UVX5 [1195-1203]	Q3UVX5 1xPhospho [S1202]	1	DYTQSSSsL______	Grm5
Q3UYC0	AAsLRGGVGAPGSPSTPPTR.Q3UYC0	6	AAsLRGGVGAPGSPSTPPTR	0.00769496	6.79416	7.03901	7.30592	6.97263	7.48818	7.04028	6.65519	6.13672	6.74472	7.32243	7.48587	7.57828	7.07859	7.27505	7.4522	7.61681	7.37184	7.50619	7.47884	7.65738	[R].AASLRGGVGAPGSPSTPPTR.[F]	1xPhospho [S3]; 1xTMTpro [N-Term]	Q3UYC0 [208-227]	Q3UYC0 1xPhospho [S210]	1	_____AAsLRGGVGA	Ppm1h
Q3V0G7	SIERPLksPLVSk.Q3V0G7	2	SIERPLksPLVSk	5.19e-07	7.65856	7.61808	8.0029	7.31489	7.76668	8.28564	8.56051	8.24569	8.53361	8.53473	7.70317	6.8854	7.30538	7.65348	7.22335	6.52133	6.63959	6.44914	6.84135	6.75821	[R].SIERPLKSPLVSK.[V]	1xPhospho [S8]; 2xTMTpro [K7; K13]; 1xTMTpro [N-Term]	Q3V0G7 [886-898]	Q3V0G7 1xPhospho [S893]	1	SIERPLKsPLVSK__	Garnl3
Q3V3V9	kAGsDGDImDSSTETPPISIk.Q3V3V9	3	kAGsDGDImDSSTETPPISIk	0.0369832	5.05882	4.97888	5.25266	5.38693	5.2516	5.14592	5.2502	5.41532	5.29229	5.45422	5.38853	5.14519	5.30957	5.37676	5.03225	5.5555	5.311	5.38774	5.65251	5.55251	[K].KAGSDGDIMDSSTETPPISIK.[S]	1xPhospho [S4]; 1xOxidation [M9]; 2xTMTpro [K1; K21]; 1xTMTpro [N-Term]	Q3V3V9 [1131-1151]	Q3V3V9 1xPhospho [S1134]	1	____KAGsDGDIMDS	Carmil2
Q3V3V9	LQRsPVLk.Q3V3V9	6	LQRsPVLk	7.61e-05	6.63909	6.30789	6.53193	6.34874	6.61075	6.24014	6.01326	6.19312	6.05952	6.30262	6.30048	6.05099	6.46074	5.95026	6.14869	6.90677	6.53227	6.99609	7.10516	7.18011	[R].LQRSPVLK.[R]	1xPhospho [S4]; 1xTMTpro [K8]; 1xTMTpro [N-Term]	Q3V3V9 [1239-1246]	Q3V3V9 1xPhospho [S1242]	1	____LQRsPVLK___	Carmil2
Q4ACU6	AHsPQGEGEIPLHR.Q4ACU6	NA	AHsPQGEGEIPLHR	0.553602	4.47299	3.85511	4.62725	4.41387	4.58276	4.13302	4.55357	4.49195	4.56886	4.66026	3.83242	4.38085	4.525	4.64733	4.7559	4.62047	4.51638	4.61395	4.7385	4.63599	[K].AHSPQGEGEIPLHR.[G]	1xPhospho [S3]; 1xTMTpro [N-Term]	Q4ACU6 [480-493]	Q4ACU6 1xPhospho [S482]	1	_____AHsPQGEGEI	Shank3
Q4ACU6	SPTPVHsPDADRPGPLFVDVQTR.Q4ACU6	3	SPTPVHsPDADRPGPLFVDVQTR	3.65e-05	6.88001	6.95249	7.07409	6.6973	7.19824	7.01479	7.09181	7.38333	7.2678	7.3901	7.58525	7.40576	8.11015	7.79261	7.76104	7.99883	7.78029	7.77403	8.43182	8.2926	[R].SPTPVHSPDADRPGPLFVDVQTR.[D]	1xPhospho [S7]; 1xTMTpro [N-Term]	Q4ACU6 [1128-1150]	Q4ACU6 1xPhospho [S1134]	1	_SPTPVHsPDADRPG	Shank3
Q4ACU6	ksPEDkk.Q4ACU6	4	ksPEDkk	0.000784515	4.91345	4.94357	4.855	4.83956	4.59548	5.53781	5.98664	6.61374	6.20619	5.60653	5.59491	5.58096	6.79906	6.62553	6.8285	6.2876	6.15462	5.60414	6.78619	6.45584	[R].KSPEDKK.[S]	1xPhospho [S2]; 3xTMTpro [K1; K6; K7]; 1xTMTpro [N-Term]	Q4ACU6 [1187-1193]	Q4ACU6 1xPhospho [S1188]	1	______KsPEDKK__	Shank3
Q4ACU6	TksVGEDEk.Q4ACU6	4	TksVGEDEk	0.00142034	5.75182	6.32668	5.919	6.09554	6.11007	6.41319	7.11882	8.0075	7.42156	7.00765	7.23609	6.68991	8.19439	7.91595	7.48151	7.20063	7.3833	6.94496	8.12426	7.71394	[R].TKSVGEDEK.[L]	1xPhospho [S3]; 2xTMTpro [K2; K9]; 1xTMTpro [N-Term]	Q4ACU6 [779-787]	Q4ACU6 1xPhospho [S781]	1	_____TKsVGEDEK_	Shank3
Q4ACU6	EPsPTHR.Q4ACU6	4	EPsPTHR	0.0312405	5.20085	5.27054	4.84783	5.54969	5.37575	5.13632	5.60178	6.84623	5.48803	5.35297	6.2206	4.83693	7.25221	6.93937	5.54132	6.95216	6.04619	6.0939	7.54061	7.10237	[R].EPSPTHR.[G]	1xPhospho [S3]; 1xTMTpro [N-Term]	Q4ACU6 [983-989]	Q4ACU6 1xPhospho [S985]	1	_____EPsPTHR___	Shank3
Q4JIM5	DksPSSLLEDAk.Q4JIM5	7	DksPSSLLEDAk	0.0287347	6.84247	6.56914	6.69494	6.81526	6.90001	6.83735	7.62794	8.01651	7.59095	7.15937	6.72175	6.16561	7.02147	7.15179	7.21757	6.80088	6.66655	6.37457	7.16414	6.80805	[R].DKSPSSLLEDAK.[E]	1xPhospho [S3]; 2xTMTpro [K2; K12]; 1xTMTpro [N-Term]	Q4JIM5 [630-641]	Q4JIM5 1xPhospho [S632]	1	_____DKsPSSLLED	Abl2
Q4JIM5	VPVLIsPTLk.Q4JIM5	7	VPVLIsPTLk	0.0145061	3.78603	2.97154	3.39484	3.74852	3.34024	4.05971	4.6955	4.82807	4.57316	4.07344	3.99401	3.41666	4.67509	4.74427	4.0414	3.6403	3.3561	3.24482	4.25846	4.08584	[K].VPVLISPTLK.[H]	1xPhospho [S6]; 1xTMTpro [K10]; 1xTMTpro [N-Term]	Q4JIM5 [931-940]	Q4JIM5 1xPhospho [S936]	1	__VPVLIsPTLK___	Abl2
Q4KMM3	kATGVsAEDADPR.Q4KMM3	3	kATGVsAEDADPR	8.51e-08	5.85465	5.96595	6.25391	6.5132	6.34091	6.26792	6.01646	6.2904	6.54071	6.45838	6.82584	7.1326	7.20075	7.21061	7.41423	7.67738	7.92191	7.8842	8.1512	7.93557	[K].KATGVSAEDADPR.[A]	1xPhospho [S6]; 1xTMTpro [K1]; 1xTMTpro [N-Term]	Q4KMM3 [303-315]	Q4KMM3 1xPhospho [S308]	1	__KATGVsAEDADPR	Oxr1
Q4KMM3	VVSStSEEEEAFTEkFLk.Q4KMM3	6	VVSStSEEEEAFTEkFLk	0.439199	1.90176	3.65435	3.38934	3.87718	4.01493	2.57259	2.10231	2.70962	3.50916	3.60801	3.19763	5.81797	3.61345	3.2666	3.21841	3.00319	3.01359	5.19495	3.59118	3.51777	[R].VVSSTSEEEEAFTEKFLK.[I]	1xPhospho [T5]; 2xTMTpro [K15; K18]; 1xTMTpro [N-Term]	Q4KMM3 [199-216]	Q4KMM3 1xPhospho [T203]	1	___VVSStSEEEEAF	Oxr1
Q4KMM3	SQsVDITAPGFNPLGGAGk.Q4KMM3	3	SQsVDITAPGFNPLGGAGk	0.00391385	3.55405	3.66989	4.12115	4.70342	4.58356	4.17888	4.50616	3.62993	4.72628	4.92556	3.79672	5.36749	4.91967	4.21742	4.70728	5.54082	5.95455	5.75466	5.47703	5.09328	[K].SQSVDITAPGFNPLGGAGK.[Q]	1xPhospho [S3]; 1xTMTpro [K19]; 1xTMTpro [N-Term]	Q4KMM3 [13-31]	Q4KMM3 1xPhospho [S15]	1	_____SQsVDITAPG	Oxr1
Q4KMM3	FDTtPNELVQLNk.Q4KMM3	4	FDTtPNELVQLNk	0.00289155	4.21005	3.56859	4.28299	4.41845	3.75727	4.08675	4.46332	4.38329	4.3806	4.29706	3.97785	4.29401	4.55824	4.54882	4.82727	4.90635	4.7493	4.69242	5.04351	4.95704	[K].FDTTPNELVQLNK.[L]	1xPhospho [T4]; 1xTMTpro [K13]; 1xTMTpro [N-Term]	Q4KMM3 [115-127]	Q4KMM3 1xPhospho [T118]	1	____FDTtPNELVQL	Oxr1
Q4KUS2	AAtPEEk.Q4KUS2	3	AAtPEEk	2.69e-06	7.64439	7.54721	7.67767	7.41496	7.50612	8.15514	8.30265	8.45531	8.46615	8.61561	9.00772	8.24955	9.12563	9.51389	9.48363	9.38405	9.21327	9.00618	9.49602	9.49153	[K].AATPEEK.[A]	1xPhospho [T3]; 1xTMTpro [K7]; 1xTMTpro [N-Term]	Q4KUS2 [414-420]	Q4KUS2 1xPhospho [T416]	1	_____AAtPEEK___	Unc13a
Q4KUS2	ESYSDSmHsYEEFSEPR.Q4KUS2	3	ESYSDSmHsYEEFSEPR	3.22e-06	6.15046	6.30093	6.10056	6.46862	6.43982	6.27927	6.13031	6.26824	6.50999	6.64931	6.68952	7.26509	7.04397	6.96356	7.28094	7.16324	7.28851	7.55261	7.48638	7.70845	[R].ESYSDSMHSYEEFSEPR.[A]	1xPhospho [S9]; 1xOxidation [M7]; 1xTMTpro [N-Term]	Q4KUS2 [236-252]	Q4KUS2 1xPhospho [S244]	1	SYSDSMHsYEEFSEP	Unc13a
Q4KUS2	ALsPTGSSR.Q4KUS2	3	ALsPTGSSR	8.18e-07	5.71281	5.77084	5.9109	6.03149	5.8958	6.28641	6.02877	6.3828	6.73693	7.02083	7.00032	7.81108	7.44806	8.22385	8.75857	8.34193	8.42396	8.68026	8.46396	8.80616	[R].ALSPTGSSR.[Y]	1xPhospho [S3]; 1xTMTpro [N-Term]	Q4KUS2 [253-261]	Q4KUS2 1xPhospho [S255]	1	_____ALsPTGSSR_	Unc13a
Q4VA53	AEsPETSAVESTQSTPQk.Q4VA53	6	AEsPETSAVESTQSTPQk	0.000276125	6.77367	6.64182	6.85301	6.92415	6.78361	5.76142	5.91477	6.02852	6.2737	6.37231	5.83112	6.30102	6.26661	6.1453	6.56684	6.64128	6.52966	6.59173	6.48673	6.61998	[R].AESPETSAVESTQSTPQK.[G]	1xPhospho [S3]; 1xTMTpro [K18]; 1xTMTpro [N-Term]	Q4VA53 [1354-1371]	Q4VA53 1xPhospho [S1356]	1	_____AEsPETSAVE	Pds5b
Q4VAA2	SGDGGsLGSGSR.Q4VAA2	5	SGDGGsLGSGSR	0.0489927	5.52796	5.28043	5.18604	5.48723	5.82304	5.36499	5.31275	4.76808	5.62687	5.51236	5.20139	5.65726	5.64663	5.19575	5.1549	5.03024	4.98847	4.76452	5.20604	4.79447	[R].SGDGGSLGSGSR.[S]	1xPhospho [S6]; 1xTMTpro [N-Term]	Q4VAA2 [58-69]	Q4VAA2 1xPhospho [S63]	1	__SGDGGsLGSGSR_	Cdv3
Q501J6	RDsTSYR.Q501J6	1	RDsTSYR	3.99e-05	4.66525	4.55985	5.08497	4.6409	4.95144	3.97379	3.92062	3.87282	3.69197	4.01106	4.02508	4.20992	4.26626	4.37134	4.42071	3.56643	3.62599	3.94604	4.0816	4.19461	[R].RDSTSYR.[D]	1xPhospho [S3]; 1xTMTpro [N-Term]	Q501J6 [518-524]	Q501J6 1xPhospho [S520]	1	_____RDsTSYR___	Ddx17
Q505F5	RQsVSGLHR.Q505F5	6	RQsVSGLHR	0.0681449	3.83921	4.14147	4.09952	4.57943	4.6218	3.88284	3.62768	3.13416	3.8964	3.85799	3.5599	3.978	3.23388	4.36444	3.96126	3.89882	3.42379	3.86442	3.68044	3.71264	[K].RQSVSGLHR.[Y]	1xPhospho [S3]; 1xTMTpro [N-Term]	Q505F5 [428-436]	Q505F5 1xPhospho [S430]	1	_____RQsVSGLHR_	Lrrc47
Q52KF3	RHsIEk.Q52KF3	4	RHsIEk	0.00996634	5.82147	5.60958	5.20438	5.06585	5.40055	5.47807	6.39099	6.81976	6.62661	6.1693	5.63183	5.71865	6.76634	6.80301	7.03993	6.73451	6.56976	6.07977	7.12435	6.77234	[R].RHSIEK.[E]	1xPhospho [S3]; 1xTMTpro [K6]; 1xTMTpro [N-Term]	Q52KF3 [363-368]	Q52KF3 1xPhospho [S365]	1	_____RHsIEK____	Spire1
Q52KF3	LRPVsPEEIRR.Q52KF3	6	LRPVsPEEIRR	0.00221116	7.39925	7.46598	7.38999	7.48045	7.54897	7.38148	7.33971	7.4922	7.76137	7.92949	7.49898	7.83299	7.81287	7.81406	7.87818	7.93172	7.82415	7.87015	8.081	8.09362	[K].LRPVSPEEIRR.[S]	1xPhospho [S5]; 1xTMTpro [N-Term]	Q52KF3 [225-235]	Q52KF3 1xPhospho [S229]	1	___LRPVsPEEIRR_	Spire1
Q52KF3	SRsVDkSDEELQFPk.Q52KF3	7	SRsVDkSDEELQFPk	0.0268111	6.31676	5.84776	6.0538	6.03201	6.2713	6.34983	6.94247	7.10957	7.0779	6.59932	6.32208	5.89506	6.68746	6.80362	6.99883	6.7186	6.57703	6.23993	6.99651	6.81469	[K].SRSVDKSDEELQFPK.[E]	1xPhospho [S3]; 2xTMTpro [K6; K15]; 1xTMTpro [N-Term]	Q52KF3 [518-532]	Q52KF3 1xPhospho [S520]	1	_____SRsVDKSDEE	Spire1
Q52KF3	LRPVsPEEIR.Q52KF3	6	LRPVsPEEIR	0.0281805	4.57302	4.63952	4.83646	5.17397	4.82726	4.47647	4.42583	4.32852	4.57703	4.35182	4.62121	4.53769	4.89359	4.77081	4.74983	4.69215	4.64093	4.68978	5.05098	5.34102	[K].LRPVSPEEIR.[R]	1xPhospho [S5]; 1xTMTpro [N-Term]	Q52KF3 [225-234]	Q52KF3 1xPhospho [S229]	1	___LRPVsPEEIR__	Spire1
Q52KF3	kLRPVsPEEIRR.Q52KF3	NA	kLRPVsPEEIRR	0.961883	7.29532	7.1722	6.96991	7.03818	7.34917	7.16887	7.15574	7.15209	7.23293	7.32057	7.11774	6.91706	7.217	7.43067	6.9586	6.88076	6.81507	6.95619	7.54131	7.55854	[R].KLRPVSPEEIRR.[S]	1xPhospho [S6]; 1xTMTpro [K1]; 1xTMTpro [N-Term]	Q52KF3 [224-235]	Q52KF3 1xPhospho [S229]	1	__KLRPVsPEEIRR_	Spire1
Q52KI8	AAsPSPQSVR.Q52KI8	1	AAsPSPQSVR	9.21e-06	7.31027	7.55848	7.80299	8.43812	8.19512	6.12258	6.22804	6.1142	6.35732	6.6172	6.47145	6.67629	6.33789	6.80248	6.70619	6.32315	6.4102	6.7895	5.9613	6.40802	[R].AASPSPQSVR.[R]	1xPhospho [S3]; 1xTMTpro [N-Term]	Q52KI8 [777-786]	Q52KI8 1xPhospho [S779]	1	_____AAsPSPQSVR	Srrm1
Q52KI8	kAQVsPQS.Q52KI8	1	kAQVsPQS	2.58e-05	8.25087	8.38496	8.63246	9.21377	8.77262	7.16314	6.98841	6.77482	7.22136	7.53693	7.60028	7.80468	7.26606	7.97286	7.99435	7.3886	7.11553	7.80131	7.22108	7.28462	[R].KAQVSPQS.[-]	1xPhospho [S5]; 1xTMTpro [K1]; 1xTMTpro [N-Term]	Q52KI8 [939-946]	Q52KI8 1xPhospho [S943]	1	___KAQVsPQS____	Srrm1
Q52KI8	SVSGsPEPAAk.Q52KI8	6	SVSGsPEPAAk	0.0236156	6.34055	6.30017	6.85523	7.00258	6.85215	5.86716	5.91211	6.11857	6.07472	6.31637	5.87229	6.40434	6.02178	6.63215	6.77135	6.51656	6.50547	6.65015	6.3569	6.67796	[R].SVSGSPEPAAK.[K]	1xPhospho [S5]; 1xTMTpro [K11]; 1xTMTpro [N-Term]	Q52KI8 [793-803]	Q52KI8 1xPhospho [S797]	1	___SVSGsPEPAAK_	Srrm1
Q52KI8	QsPSPSTRPIR.Q52KI8	1	QsPSPSTRPIR	8.15e-05	6.62666	6.61724	7.1399	6.96969	6.84289	5.54613	5.82652	6.18702	6.10443	6.07888	5.4092	5.72597	5.56745	6.16944	6.201	5.77425	5.816	5.96017	5.48061	5.76179	[R].QSPSPSTRPIR.[R]	1xPhospho [S2]; 1xTMTpro [N-Term]	Q52KI8 [730-740]	Q52KI8 1xPhospho [S731]	1	______QsPSPSTRP	Srrm1
Q52KI8	TSsPPR.Q52KI8	1	TSsPPR	0.000540831	6.07708	5.63493	6.1953	6.59107	6.2539	4.77862	5.35163	5.32302	5.21181	5.21106	4.84123	4.41512	5.00427	5.67687	5.47688	5.17634	5.14645	5.06647	4.97597	4.88316	[R].TSSPPR.[K]	1xPhospho [S3]; 1xTMTpro [N-Term]	Q52KI8 [376-381]	Q52KI8 1xPhospho [S378]	1	_____TSsPPR____	Srrm1
Q52KI8	RLsPsASPPR.Q52KI8	1	RLsPsASPPR	4.96e-05	6.06294	5.88114	6.42485	6.48905	6.59051	5.17806	5.3956	5.30592	5.84398	5.97741	5.20666	5.14941	5.40325	5.26387	5.39185	5.03549	5.23996	5.39315	5.01751	5.07938	[R].RLSPSASPPR.[R]	2xPhospho [S3; S5]; 1xTMTpro [N-Term]	Q52KI8 [385-394]	Q52KI8 2xPhospho [S387; S389]	2	_____RLsPsASPPR	Srrm1
Q52KI8	RRtPsPPPR.Q52KI8	1	RRtPsPPPR	0.00252647	6.27991	6.07088	6.48787	7.18564	6.24942	5.23117	5.8295	5.91312	5.48038	5.44148	5.37277	5.31386	5.48897	6.22203	5.89234	5.68529	5.59566	5.53992	5.36754	5.48831	[R].RRTPSPPPR.[R]	2xPhospho [T3; S5]; 1xTMTpro [N-Term]	Q52KI8 [598-606]	Q52KI8 2xPhospho [T600; S602]	2	_____RRtPsPPPR_	Srrm1
Q52KI8	TAsPPPPPkR.Q52KI8	1	TAsPPPPPkR	7.4e-06	7.19631	7.32896	7.5734	7.98193	7.84006	6.28149	6.43907	6.29368	6.39372	6.75781	6.33952	6.4654	6.43843	6.71998	6.716	6.34401	6.36648	6.67285	6.25315	6.61282	[R].TASPPPPPKR.[R]	1xPhospho [S3]; 1xTMTpro [K9]; 1xTMTpro [N-Term]	Q52KI8 [633-642]	Q52KI8 1xPhospho [S635]	1	_____TAsPPPPPKR	Srrm1
Q52KI8	QRsPTVTk.Q52KI8	1	QRsPTVTk	0.0039273	8.55092	8.14269	8.73983	8.89535	8.52694	7.35225	8.16905	8.41357	7.84128	7.88523	7.31958	7.22444	7.63799	8.14158	8.31964	7.74398	7.62517	7.49828	7.50915	7.55464	[K].QRSPTVTK.[R]	1xPhospho [S3]; 1xTMTpro [K8]; 1xTMTpro [N-Term]	Q52KI8 [662-669]	Q52KI8 1xPhospho [S664]	1	_____QRsPTVTK__	Srrm1
Q52KI8	RWQsPVTk.Q52KI8	1	RWQsPVTk	6.93e-05	6.82976	6.63518	7.03984	7.46353	7.46267	5.8776	5.97614	5.72666	6.05107	6.38691	6.16575	6.25852	5.99568	6.48751	6.40224	6.15488	5.82072	6.24488	6.06768	6.02648	[K].RWQSPVTK.[S]	1xPhospho [S4]; 1xTMTpro [K8]; 1xTMTpro [N-Term]	Q52KI8 [547-554]	Q52KI8 1xPhospho [S550]	1	____RWQsPVTK___	Srrm1
Q52KI8	TRHsPTPQQSNR.Q52KI8	1	TRHsPTPQQSNR	6.2e-05	5.84301	5.80982	6.18376	6.82054	6.41162	4.79467	5.54427	5.19135	5.08159	5.4363	4.94	5.01931	4.99596	5.44677	5.31812	4.58378	4.89777	5.17741	4.55114	4.76863	[K].TRHSPTPQQSNR.[T]	1xPhospho [S4]; 1xTMTpro [N-Term]	Q52KI8 [409-420]	Q52KI8 1xPhospho [S412]	1	____TRHsPTPQQSN	Srrm1
Q52KI8	EksPELPEPSVR.Q52KI8	1	EksPELPEPSVR	0.00127438	6.79725	6.53926	6.93539	7.28559	7.14512	6.05019	6.26436	6.22585	6.31615	6.45078	6.08278	6.23798	6.44171	6.37086	6.76649	6.21103	6.34074	6.31027	6.22555	6.53888	[K].EKSPELPEPSVR.[M]	1xPhospho [S3]; 1xTMTpro [K2]; 1xTMTpro [N-Term]	Q52KI8 [218-229]	Q52KI8 1xPhospho [S220]	1	_____EKsPELPEPS	Srrm1
Q52KI8	VSHsPPPk.Q52KI8	1	VSHsPPPk	0.000497306	4.96245	4.60524	5.11525	5.42093	4.96792	4.36401	4.1563	4.20142	4.47134	4.44525	4.32998	4.17504	4.26903	4.74579	4.6527	4.38581	4.29667	4.35239	4.27896	4.17955	[R].VSHSPPPK.[Q]	1xPhospho [S4]; 1xTMTpro [K8]; 1xTMTpro [N-Term]	Q52KI8 [654-661]	Q52KI8 1xPhospho [S657]	1	____VSHsPPPK___	Srrm1
Q52KI8	RTAsPPPPPkR.Q52KI8	1	RTAsPPPPPkR	0.000550436	4.22871	4.60913	4.63446	5.06469	5.07341	3.34163	3.83757	3.31676	3.75483	4.02958	3.10673	3.81052	3.74813	4.09151	3.94001	3.76029	3.79983	4.09538	3.68512	3.66493	[R].RTASPPPPPKR.[R]	1xPhospho [S4]; 1xTMTpro [K10]; 1xTMTpro [N-Term]	Q52KI8 [632-642]	Q52KI8 1xPhospho [S635]	1	____RTAsPPPPPKR	Srrm1
Q52KI8	RRsPtPPPR.Q52KI8	1	RRsPtPPPR	0.0230363	4.184	4.10187	4.02725	4.90407	4.64279	3.39307	4.13319	4.08422	3.52327	3.8627	3.48117	3.12331	3.37302	4.42807	4.09628	3.24016	3.52895	3.60188	3.4682	3.71672	[R].RRSPTPPPR.[R]	2xPhospho [S3; T5]; 1xTMTpro [N-Term]	Q52KI8 [589-597]	Q52KI8 2xPhospho [S591; T593]	2	_____RRsPtPPPR_	Srrm1
Q52KI8	WQsPVTk.Q52KI8	1	WQsPVTk	5.92e-05	9.61886	9.77065	10.148	10.6301	10.4101	8.68915	8.80776	8.591	8.81443	9.31553	8.98002	9.09899	8.82306	9.33917	9.27829	8.96415	8.85601	9.30255	8.75597	8.89117	[R].WQSPVTK.[S]	1xPhospho [S3]; 1xTMTpro [K7]; 1xTMTpro [N-Term]	Q52KI8 [548-554]	Q52KI8 1xPhospho [S550]	1	_____WQsPVTK___	Srrm1
Q52KI8	HRPSsPAtPPPk.Q52KI8	1	HRPSsPAtPPPk	9.84e-06	6.50417	6.56555	7.06511	7.06619	6.96146	5.64043	5.86244	5.84224	5.84384	6.05345	5.78092	5.76606	5.86461	6.24815	6.04853	5.9283	5.9433	6.08325	5.9121	6.11119	[R].HRPSSPATPPPK.[T]	2xPhospho [S5; T8]; 1xTMTpro [K12]; 1xTMTpro [N-Term]	Q52KI8 [397-408]	Q52KI8 2xPhospho [S401; T404]	2	___HRPSsPAtPPPK	Srrm1
Q52KI8	TAsPPPPPk.Q52KI8	1	TAsPPPPPk	7.61e-05	7.90638	8.1349	8.44242	8.59479	8.49457	7.21023	7.33133	7.26187	7.54523	7.82655	7.4551	7.58449	7.46604	7.61892	7.76191	7.61973	7.5718	7.70524	7.51506	7.62404	[R].TASPPPPPK.[R]	1xPhospho [S3]; 1xTMTpro [K9]; 1xTMTpro [N-Term]	Q52KI8 [633-641]	Q52KI8 1xPhospho [S635]	1	_____TAsPPPPPK_	Srrm1
Q52KI8	sPQPNk.Q52KI8	6	sPQPNk	2.45e-07	7.27423	7.73849	7.63736	7.93425	7.93228	5.58212	5.65106	5.87015	6.12009	6.0797	6.26104	6.78931	6.65336	6.43955	6.62648	7.03357	6.99811	7.03005	6.68174	7.19371	[R].SPQPNK.[R]	1xPhospho [S1]; 1xTMTpro [K6]; 1xTMTpro [N-Term]	Q52KI8 [694-699]	Q52KI8 1xPhospho [S694]	1	_______sPQPNK__	Srrm1
Q52KI8	RRsPsPPPAR.Q52KI8	1	RRsPsPPPAR	2.45e-06	5.80723	5.82732	5.83396	6.44565	6.49982	4.72674	4.58035	4.52161	4.60197	4.88626	4.61989	5.12011	4.81399	5.31608	5.019	4.41119	4.76767	4.77954	4.46894	4.74641	[R].RRSPSPPPAR.[R]	2xPhospho [S3; S5]; 1xTMTpro [N-Term]	Q52KI8 [559-568]	Q52KI8 2xPhospho [S561; S563]	2	_____RRsPsPPPAR	Srrm1
Q52KI8	REsPSPAPkPR.Q52KI8	1	REsPSPAPkPR	0.00139984	7.56793	7.42026	7.71194	7.89761	7.71418	6.62293	7.1658	7.34989	7.00039	7.09362	6.50123	6.3858	6.76539	7.24104	7.28025	6.82173	7.02806	6.8305	6.79951	6.97784	[K].RESPSPAPKPR.[K]	1xPhospho [S3]; 1xTMTpro [K9]; 1xTMTpro [N-Term]	Q52KI8 [446-456]	Q52KI8 1xPhospho [S448]	1	_____REsPSPAPKP	Srrm1
Q52KI8	EARsPQPNk.Q52KI8	1	EARsPQPNk	0.00534855	6.58355	6.02138	6.69646	7.30257	6.33209	5.205	5.99495	6.34081	5.79229	5.57685	5.3533	5.02719	5.47052	5.91285	6.15584	5.68214	5.43798	5.47344	4.99973	5.78329	[R].EARSPQPNK.[R]	1xPhospho [S4]; 1xTMTpro [K9]; 1xTMTpro [N-Term]	Q52KI8 [691-699]	Q52KI8 1xPhospho [S694]	1	____EARsPQPNK__	Srrm1
Q571K4	RIsVTSk.Q571K4	5	RIsVTSk	0.0289608	8.21436	7.78261	7.96854	7.90391	7.83381	8.2021	8.81835	7.64703	8.35214	8.10034	7.69202	7.05444	7.56796	7.61948	7.82297	8.10974	7.67892	7.0308	7.75129	7.38907	[R].RISVTSK.[AV]	1xPhospho [S3]; 1xTMTpro [K7]; 1xTMTpro [N-Term]	Q571K4 [647-653]	Q571K4 1xPhospho [S649]	1	_____RIsVTSK___	Tab3
Q5DTX6	TAQQPAGLALENVAsPDRR.Q5DTX6	6	TAQQPAGLALENVAsPDRR	0.0233967	5.29106	5.57102	5.87547	5.76254	6.04771	5.42584	5.33494	5.21438	5.54493	5.76966	5.42509	5.82907	5.72931	5.77361	5.85471	5.77474	6.04758	5.97881	5.93303	6.0102	[R].TAQQPAGLALENVASPDRR.[L]	1xPhospho [S15]; 1xTMTpro [N-Term]	Q5DTX6 [874-892]	Q5DTX6 1xPhospho [S888]	1	LALENVAsPDRR___	Jcad
Q5DTX6	SADsVEEPDPLk.Q5DTX6	6	SADsVEEPDPLk	0.129815	4.70604	4.57027	5.1992	5.45719	5.15818	4.51889	4.52757	4.66318	4.56206	4.9193	4.24702	4.99539	5.01276	4.72297	4.90262	4.94789	5.26686	5.04573	4.9066	4.88341	[K].SADSVEEPDPLK.[V]	1xPhospho [S4]; 1xTMTpro [K12]; 1xTMTpro [N-Term]	Q5DTX6 [1245-1256]	Q5DTX6 1xPhospho [S1248]	1	____SADsVEEPDPL	Jcad
Q5DTY9	LLAPEDVkQsPDEFcHSDFEDASQGSDTR.Q5DTY9	3	LLAPEDVkQsPDEFcHSDFEDASQGSDTR	0.00229598	4.38163	4.0588	5.20987	4.93842	5.26142	4.46247	4.60986	5.21007	5.12511	5.07211	5.19677	5.63881	5.0776	5.49255	5.46589	5.90075	5.80514	6.13156	5.5423	5.62854	[K].LLAPEDVKQSPDEFCHSDFEDASQGSDTR.[I]	1xCarbamidomethyl [C15]; 1xPhospho [S10]; 1xTMTpro [K8]; 1xTMTpro [N-Term]	Q5DTY9 [121-149]	Q5DTY9 1xPhospho [S130]	1	APEDVKQsPDEFCHS	Kctd16
Q5DTY9	TLTSGsRESNISSk.Q5DTY9	3	TLTSGsRESNISSk	9.28e-08	6.15927	6.11276	6.40268	5.81276	6.37672	7.25799	7.40066	8.20266	7.86581	7.84256	8.53748	8.43638	8.73898	9.27092	9.19558	8.36496	8.432	8.41	8.97387	8.85828	[R].TLTSGSRESNISSK.[K]	1xPhospho [S6]; 1xTMTpro [K14]; 1xTMTpro [N-Term]	Q5DTY9 [367-380]	Q5DTY9 1xPhospho [S372]	1	__TLTSGsRESNISS	Kctd16
Q5DU14	YPVQSEGSSPLsPQYSk.Q5DU14	2	YPVQSEGSSPLsPQYSk	0.000192051	7.37739	6.83926	6.92766	6.47963	7.02988	7.04966	7.84776	7.86661	7.56698	7.3073	6.32405	5.8313	6.66171	6.68518	6.67425	6.28948	6.24872	5.96562	6.47333	6.42652	[K].YPVQSEGSSPLSPQYSK.[A]	1xPhospho [S12]; 1xTMTpro [K17]; 1xTMTpro [N-Term]	Q5DU14 [1543-1559]	Q5DU14 1xPhospho [S1554]	1	SEGSSPLsPQYSK__	Myo16
Q5DU25	LRSsASESR.Q5DU25	6	LRSsASESR	0.0018807	5.05117	4.59333	5.01839	5.66568	5.2314	4.10311	4.0268	4.09267	4.38678	4.48774	4.41621	4.99534	4.66569	5.0883	5.09489	4.65298	4.69602	4.92971	4.7451	4.96648	[R].LRSSASESR.[M]	1xPhospho [S4]; 1xTMTpro [N-Term]	Q5DU25 [360-368]	Q5DU25 1xPhospho [S363]	1	____LRSsASESR__	Iqsec2
Q5DU25	mQFsFEEYEk.Q5DU25	4	mQFsFEEYEk	0.0651863	7.95912	7.8102	7.46384	7.15195	7.09581	7.82115	7.95989	7.96952	8.05127	7.97863	7.65538	7.55499	8.43145	8.42105	8.51751	7.94799	7.85594	7.6774	8.46577	8.30936	[R].MQFSFEEYEK.[A]	1xPhospho [S4]; 1xOxidation [M1]; 1xTMTpro [K10]; 1xTMTpro [N-Term]	Q5DU25 [380-389]	Q5DU25 1xPhospho [S383]	1	____MQFsFEEYEK_	Iqsec2
Q5DU25	SsLEDTYGAGDGLkR.Q5DU25	4	SsLEDTYGAGDGLkR	0.0516147	5.54331	5.59895	5.74791	5.66796	6.10954	5.89529	5.99233	6.57807	6.20518	6.1087	5.82596	5.87135	6.42945	6.40359	6.7645	6.01561	6.133	5.96777	6.22488	6.2795	[R].SSLEDTYGAGDGLKR.[G]	1xPhospho [S2]; 1xTMTpro [K14]; 1xTMTpro [N-Term]	Q5DU25 [1113-1127]	Q5DU25 1xPhospho [S1114]	1	______SsLEDTYGA	Iqsec2
Q5DU25	AQNPAYFEGkPAsLDEGAmAGAR.Q5DU25	4	AQNPAYFEGkPAsLDEGAmAGAR	0.000970384	7.88439	7.88085	8.31405	7.8222	8.06787	8.39768	8.71463	8.78655	8.83379	8.80891	8.34206	8.38288	9.10056	8.95514	8.90768	8.8409	8.74515	8.40533	9.1101	8.92415	[K].AQNPAYFEGKPASLDEGAMAGAR.[S]	1xPhospho [S13]; 1xOxidation [M19]; 1xTMTpro [K10]; 1xTMTpro [N-Term]	Q5DU25 [390-412]	Q5DU25 1xPhospho [S402]	1	YFEGKPAsLDEGAMA	Iqsec2
Q5F2E8	NsPQALR.Q5F2E8	NA	NsPQALR	0.972089	5.34386	5.55715	5.72013	5.49434	5.45823	4.88719	5.11744	6.25146	6.03901	5.29927	5.11392	5.33236	5.65959	6.12267	5.83745	5.46201	5.18951	5.49494	5.93778	5.44627	[R].NSPQALR.[R]	1xPhospho [S2]; 1xTMTpro [N-Term]	Q5F2E8 [964-970]	Q5F2E8 1xPhospho [S965]	1	______NsPQALR__	Taok1
Q5F2E8	NsPQALRR.Q5F2E8	2	NsPQALRR	0.193386	5.27487	4.81579	5.55073	5.00986	4.98116	4.8339	5.46934	6.45697	5.69139	5.51011	5.42526	4.57723	5.31692	5.81295	5.32502	5.04819	4.81227	4.71428	5.41582	4.96087	[R].NSPQALRR.[T]	1xPhospho [S2]; 1xTMTpro [N-Term]	Q5F2E8 [964-971]	Q5F2E8 1xPhospho [S965]	1	______NsPQALRR_	Taok1
Q5FWK3	SSsPEPVTHLk.Q5FWK3	2	SSsPEPVTHLk	0.0876048	6.32029	6.28201	6.67636	6.4864	6.03727	6.16036	7.21679	7.1703	6.8175	6.3427	5.55472	5.59625	6.35219	6.15994	6.75852	6.25591	6.07844	5.71727	6.41244	6.23975	[K].SSSPEPVTHLK.[W]	1xPhospho [S3]; 1xTMTpro [K11]; 1xTMTpro [N-Term]	Q5FWK3 [49-59]	Q5FWK3 1xPhospho [S51]	1	_____SSsPEPVTHL	Arhgap1
Q5GH67	sISNNR.Q5GH67	8	sISNNR	0.00255725	5.53226	5.76985	5.60529	5.49313	5.78923	5.29657	5.30469	5.25691	5.44429	5.21901	5.61841	5.50177	5.82462	6.22279	6.03046	5.42594	4.95482	5.24	5.58681	5.14466	[R].SISNNR.[S]	1xPhospho [S1]; 1xTMTpro [N-Term]	Q5GH67 [545-550]	Q5GH67 1xPhospho [S545]	1	_______sISNNR__	Xkr4
Q5GH67	QAsNASk.Q5GH67	7	QAsNASk	1.33e-05	5.55585	5.54481	5.7012	5.90222	6.04994	6.61379	6.50247	6.4562	6.3875	6.46862	6.38493	6.54594	6.73613	6.7757	6.78884	6.07603	6.07828	6.28719	6.44574	6.0376	[R].QASNASK.[S]	1xPhospho [S3]; 1xTMTpro [K7]; 1xTMTpro [N-Term]	Q5GH67 [212-218]	Q5GH67 1xPhospho [S214]	1	_____QAsNASK___	Xkr4
Q5HZI2	HGSLSADDSTPDTsPGVR.Q5HZI2	6	HGSLSADDSTPDTsPGVR	0.06673	4.35926	4.38003	5.18705	4.66458	4.51155	4.53274	4.26169	4.5351	4.3573	4.69338	4.61037	4.70239	4.44905	4.85091	4.60257	4.66289	4.8048	4.69654	5.48295	5.47581	[R].HGSLSADDSTPDTSPGVR.[R]	1xPhospho [S14]; 1xTMTpro [N-Term]	Q5HZI2 [257-274]	Q5HZI2 1xPhospho [S270]	1	DDSTPDTsPGVR___	C2cd4c
Q5HZI2	AQTSYGFATLAEsPHTR.Q5HZI2	1	AQTSYGFATLAEsPHTR	0.00745421	7.39196	7.44363	7.30122	7.42404	7.33705	7.08972	6.75309	6.67874	7.15316	7.35474	6.57565	6.90024	7.08676	6.87256	6.66524	6.66919	6.53304	6.8844	7.13448	7.11051	[K].AQTSYGFATLAESPHTR.[R]	1xPhospho [S13]; 1xTMTpro [N-Term]	Q5HZI2 [141-157]	Q5HZI2 1xPhospho [S153]	1	GFATLAEsPHTR___	C2cd4c
Q5HZI2	RAtPEPGPESGQAPR.Q5HZI2	NA	RAtPEPGPESGQAPR	0.361993	4.73932	4.86514	4.53306	4.77497	4.89758	5.08042	4.8867	4.48139	4.92619	5.03304	4.4138	4.27115	5.02815	4.51724	4.47724	4.27564	4.55637	4.22486	5.0924	5.114	[R].RATPEPGPESGQAPR.[G]	1xPhospho [T3]; 1xTMTpro [N-Term]	Q5HZI2 [280-294]	Q5HZI2 1xPhospho [T282]	1	_____RAtPEPGPES	C2cd4c
Q5PR69	VNLsPVTPAk.Q5PR69	2	VNLsPVTPAk	0.00654277	4.61374	4.40076	5.19352	3.93279	3.8793	4.1197	4.76959	4.72993	5.14825	4.60572	2.86377	3.55727	3.98781	4.21058	3.89013	4.05393	3.54574	2.96511	3.68401	3.5385	[K].VNLSPVTPAK.[D]	1xPhospho [S4]; 1xTMTpro [K10]; 1xTMTpro [N-Term]	Q5PR69 [549-558]	Q5PR69 1xPhospho [S552]	1	____VNLsPVTPAK_	Crad
Q5PR69	ETAQTDsPQPQER.Q5PR69	5	ETAQTDsPQPQER	0.00572476	4.77428	4.82241	5.64154	5.28402	5.2995	4.43863	4.58658	4.46509	5.13255	5.00755	4.11561	4.82044	4.2416	4.82232	4.50825	4.07486	3.90116	4.79094	3.9092	4.27092	[K].ETAQTDSPQPQER.[Q]	1xPhospho [S7]; 1xTMTpro [N-Term]	Q5PR69 [481-493]	Q5PR69 1xPhospho [S487]	1	_ETAQTDsPQPQER_	Crad
Q5PR69	kPALsPR.Q5PR69	5	kPALsPR	6.16e-09	8.20435	7.95194	8.49981	8.38675	7.87713	7.73676	8.16388	7.58546	8.19001	8.1051	6.28901	5.44276	6.04355	6.50405	5.70873	5.22157	5.13194	5.51882	4.97498	5.14839	[R].KPALSPR.[K]	1xPhospho [S5]; 1xTMTpro [K1]; 1xTMTpro [N-Term]	Q5PR69 [888-894]	Q5PR69 1xPhospho [S892]	1	___KPALsPR_____	Crad
Q5PR69	HsLDGSk.Q5PR69	2	HsLDGSk	9.06e-05	7.39092	6.87948	7.25742	6.86642	6.55607	6.94678	8.2913	8.07012	8.69298	7.62347	6.07302	6.03894	7.01129	6.95603	6.81268	5.67124	6.05891	5.79786	6.0166	5.74781	[R].HSLDGSK.[V]	1xPhospho [S2]; 1xTMTpro [K7]; 1xTMTpro [N-Term]	Q5PR69 [1045-1051]	Q5PR69 1xPhospho [S1046]	1	______HsLDGSK__	Crad
Q5RJI5	SVSGASTGLSSsPLSSPR.Q5RJI5	5	SVSGASTGLSSsPLSSPR	0.100891	5.78244	6.0204	6.10593	6.01747	6.09136	5.71867	5.5767	5.68715	6.02598	5.85675	5.63352	5.97034	5.97516	5.69894	6.04483	5.39128	5.44336	5.79005	6.03729	5.6763	[R].SVSGASTGLSSSPLSSPR.[S]	1xPhospho [S12]; 1xTMTpro [N-Term]	Q5RJI5 [432-449]	Q5RJI5 1xPhospho [S443]	1	ASTGLSSsPLSSPR_	Brsk1
Q5RJI5	GGGsPTSk.Q5RJI5	8	GGGsPTSk	0.00280954	6.65721	6.81059	6.75873	6.75694	7.27741	6.7479	6.3604	6.73307	6.96543	7.03665	7.2091	6.83256	7.07064	7.23378	7.20098	6.47705	6.34442	6.66777	6.34989	6.40268	[R].GGGSPTSK.[T]	1xPhospho [S4]; 1xTMTpro [K8]; 1xTMTpro [N-Term]	Q5RJI5 [467-474]	Q5RJI5 1xPhospho [S470]	1	____GGGsPTSK___	Brsk1
Q5RJI5	smEVLSITDAGSGGSPVPTRR.Q5RJI5	NA	smEVLSITDAGSGGSPVPTRR	0.83361	6.02054	5.59787	5.93211	5.76581	5.91271	5.86758	5.65852	5.70658	5.76371	5.8378	5.68639	5.95679	5.92987	5.80751	5.78563	5.49268	5.79746	5.77709	5.98244	5.93226	[K].SMEVLSITDAGSGGSPVPTRR.[A]	1xPhospho [S1]; 1xOxidation [M2]; 1xTMTpro [N-Term]	Q5RJI5 [399-419]	Q5RJI5 1xPhospho [S399]	1	_______sMEVLSIT	Brsk1
Q5SNZ0	mkAGsPGSEVVTLQQFLEESNk.Q5SNZ0	NA	mkAGsPGSEVVTLQQFLEESNk	0.597373	3.98763	3.31963	4.52785	4.58944	4.43641	3.79797	4.1638	3.86342	4.24806	4.13329	3.78913	3.68926	3.86895	4.14208	4.03001	4.2837	3.80867	3.67061	4.19285	3.67583	[K].MKAGSPGSEVVTLQQFLEESNK.[L]	1xPhospho [S5]; 1xOxidation [M1]; 2xTMTpro [K2; K22]; 1xTMTpro [N-Term]	Q5SNZ0 [1673-1694]	Q5SNZ0 1xPhospho [S1677]	1	___MKAGsPGSEVVT	Ccdc88a
Q5SNZ0	SSsQENLLDEVmk.Q5SNZ0	5	SSsQENLLDEVmk	5.3e-06	6.28597	6.41719	6.46598	5.70656	6.53691	6.30562	6.2233	5.9192	6.48787	6.35646	5.52138	5.22982	5.63261	5.33402	5.42435	5.00874	5.09534	5.05922	5.35553	5.32215	[K].SSSQENLLDEVMK.[S]	1xPhospho [S3]; 1xOxidation [M12]; 1xTMTpro [K13]; 1xTMTpro [N-Term]	Q5SNZ0 [1702-1714]	Q5SNZ0 1xPhospho [S1704]	1	_____SSsQENLLDE	Ccdc88a
Q5SNZ0	VHASRPAsLDSGR.Q5SNZ0	8	VHASRPAsLDSGR	0.014948	5.13711	5.08279	5.22982	4.85408	5.33007	5.1727	5.2244	5.1529	5.59327	5.35004	5.11969	4.93984	5.54865	5.62347	5.57231	4.57341	4.8493	4.81321	5.06581	4.94161	[R].VHASRPASLDSGR.[T]	1xPhospho [S8]; 1xTMTpro [N-Term]	Q5SNZ0 [1581-1593]	Q5SNZ0 1xPhospho [S1588]	1	VHASRPAsLDSGR__	Ccdc88a
Q5SP85	HSGGsPEHLQk.Q5SP85	2	HSGGsPEHLQk	0.0103628	6.81132	6.83733	7.25945	7.12896	7.11753	7.40175	7.26877	7.0137	7.54544	7.71215	7.2216	7.25602	7.21893	7.38464	7.23027	6.89717	7.05054	7.0403	6.82997	7.05862	[R].HSGGSPEHLQK.[H]	1xPhospho [S5]; 1xTMTpro [K11]; 1xTMTpro [N-Term]	Q5SP85 [326-336]	Q5SP85 1xPhospho [S330]	1	___HSGGsPEHLQK_	Ccdc85a
Q5SP85	HALGGsLEHLPR.Q5SP85	2	HALGGsLEHLPR	0.0975309	6.42839	6.55785	7.00638	6.97211	7.01786	7.11915	6.94952	6.857	7.24296	7.29675	6.97074	6.85732	7.03474	7.04297	6.74204	6.94705	6.8031	6.6821	6.83838	6.75574	[K].HALGGSLEHLPR.[A]	1xPhospho [S6]; 1xTMTpro [N-Term]	Q5SP85 [337-348]	Q5SP85 1xPhospho [S342]	1	__HALGGsLEHLPR_	Ccdc85a
Q5SP85	GTsPEHLk.Q5SP85	7	GTsPEHLk	0.00145468	5.86762	5.4433	5.81645	6.06584	5.80262	6.85136	7.92675	8.04224	7.28645	6.8328	6.85509	6.03127	7.33138	7.35386	7.56568	7.2577	6.63819	6.1463	6.90178	6.67225	[R].GTSPEHLK.[Q]	1xPhospho [S3]; 1xTMTpro [K8]; 1xTMTpro [N-Term]	Q5SP85 [351-358]	Q5SP85 1xPhospho [S353]	1	_____GTsPEHLK__	Ccdc85a
Q5SP85	HASGSGGSGGGsREGTLR.Q5SP85	7	HASGSGGSGGGsREGTLR	0.00191301	4.67642	4.51197	4.87454	4.19574	3.94318	5.02158	5.69486	5.82678	5.62793	5.56487	5.23878	3.98549	5.17387	5.32254	5.02987	4.69579	4.38605	4.13788	4.62729	4.4233	[K].HASGSGGSGGGSREGTLR.[R]	1xPhospho [S12]; 1xTMTpro [N-Term]	Q5SP85 [369-386]	Q5SP85 1xPhospho [S380]	1	SGGSGGGsREGTLR_	Ccdc85a
Q5SP85	HPHPGSsPEVLPk.Q5SP85	2	HPHPGSsPEVLPk	0.0215716	4.83948	4.77128	4.91319	4.82049	5.10853	5.0062	5.12594	5.12946	5.41468	5.04688	4.43331	4.19749	4.85492	4.90593	4.94177	4.58999	4.20715	4.82013	4.63673	4.92803	[R].HPHPGSSPEVLPK.[H]	1xPhospho [S7]; 1xTMTpro [K13]; 1xTMTpro [N-Term]	Q5SP85 [290-302]	Q5SP85 1xPhospho [S296]	1	_HPHPGSsPEVLPK_	Ccdc85a
Q5SRX1	AAETVPDLPsPPTEAPAPASNTSTR.Q5SRX1	NA	AAETVPDLPsPPTEAPAPASNTSTR	0.987304	6.93932	7.00252	6.87432	6.66764	7.00972	6.94189	6.87098	6.9027	6.9185	6.92605	6.75993	6.69261	7.0246	7.12936	6.92213	6.79341	6.8145	6.67613	7.00631	7.10792	[K].AAETVPDLPSPPTEAPAPASNTSTR.[K]	1xPhospho [S10]; 1xTMTpro [N-Term]	Q5SRX1 [470-494]	Q5SRX1 1xPhospho [S479]	1	ETVPDLPsPPTEAPA	Tom1l2
Q5SRX1	GIEFPmADLDALsPIHTPQR.Q5SRX1	4	GIEFPmADLDALsPIHTPQR	0.200909	3.76598	4.89136	4.63317	4.55588	4.69984	4.6436	4.51664	4.74789	4.98421	4.84973	4.49638	4.12236	4.50875	4.81491	5.11704	4.93077	5.01033	4.82361	4.92157	5.01129	[R].GIEFPMADLDALSPIHTPQR.[S]	1xPhospho [S13]; 1xOxidation [M6]; 1xTMTpro [N-Term]	Q5SRX1 [148-167]	Q5SRX1 1xPhospho [S160]	1	MADLDALsPIHTPQR	Tom1l2
Q5SSL4	TAVTtPkGETR.Q5SSL4	8	TAVTtPkGETR	0.00216639	6.40768	6.52332	6.57421	6.03045	6.27234	6.53411	6.70662	6.71565	7.1307	7.20633	7.08167	7.04779	7.20384	7.52109	7.4819	6.38042	6.79864	6.90867	7.24719	7.20226	[R].TAVTTPKGETR.[Q]	1xPhospho [T5]; 1xTMTpro [K7]; 1xTMTpro [N-Term]	Q5SSL4 [290-300]	Q5SSL4 1xPhospho [T294]	1	___TAVTtPKGETR_	Abr
Q5SSM3	HSATDkRDsEEESESTAL.Q5SSM3	3	HSATDkRDsEEESESTAL	4.48e-07	5.3447	5.50027	5.41682	5.20191	5.7992	6.13667	6.09729	6.55818	6.50454	6.63818	6.7191	7.21692	7.16923	7.48129	7.30686	6.96944	7.15402	6.89089	7.457	7.50825	[R].HSATDKRDSEEESESTAL.[-]	1xPhospho [S9]; 1xTMTpro [K6]; 1xTMTpro [N-Term]	Q5SSM3 [797-814]	Q5SSM3 1xPhospho [S805]	1	SATDKRDsEEESEST	Arhgap44
Q5SSM3	GSPGSIQGTPcPGTQLGPQPAASPSQLPADQsPHTLR.Q5SSM3	NA	GSPGSIQGTPcPGTQLGPQPAASPSQLPADQsPHTLR	0.381537	4.96791	4.7996	5.1703	4.80858	5.08554	4.84783	4.90708	5.12056	5.30374	5.37385	4.91422	4.92941	5.03645	5.09095	4.58885	4.90288	4.80047	4.8241	5.14878	4.96575	[K].GSPGSIQGTPCPGTQLGPQPAASPSQLPADQSPHTLR.[K]	1xCarbamidomethyl [C11]; 1xPhospho [S32]; 1xTMTpro [N-Term]	Q5SSM3 [605-641]	Q5SSM3 1xPhospho [S636]	1	SQLPADQsPHTLR__	Arhgap44
Q5SV85	TADSVsPLEPPTkDTFPSAFASGAAQQTQTQVk.Q5SV85	2	TADSVsPLEPPTkDTFPSAFASGAAQQTQTQVk	0.00390982	5.36615	5.25603	5.37186	5.33418	5.16693	5.26591	5.97137	5.95564	5.67748	5.44897	4.77386	4.26043	4.97356	5.27205	4.98431	4.75863	4.96013	4.53718	5.37504	5.11812	[K].TADSVSPLEPPTKDTFPSAFASGAAQQTQTQVK.[T]	1xPhospho [S6]; 2xTMTpro [K13; K33]; 1xTMTpro [N-Term]	Q5SV85 [571-603]	Q5SV85 1xPhospho [S576]	1	__TADSVsPLEPPTK	Synrg
Q5SVL6	SHsmETmVGSQR.Q5SVL6	3	SHsmETmVGSQR	0.0886073	2.12504	3.20406	3.49187	3.11614	3.02869	3.12231	2.81566	2.72091	3.11065	2.97982	2.87901	3.60428	3.90667	3.89824	3.26861	3.60161	3.70704	2.87584	3.8334	3.33889	[R].SHSMETMVGSQR.[K]	1xPhospho [S3]; 2xOxidation [M4; M7]; 1xTMTpro [N-Term]	Q5SVL6 [486-497]	Q5SVL6 1xPhospho [S488]	1	_____SHsMETMVGS	Rap1gap2
Q5SVL6	kQELANSSDVTLPDRPLsPPLTAPPTmk.Q5SVL6	3	kQELANSSDVTLPDRPLsPPLTAPPTmk	0.000522229	6.32945	6.32192	6.52989	6.41465	6.3858	6.46821	6.4712	6.56578	6.67818	6.71825	6.46484	6.79667	6.66492	6.79216	6.94126	6.84112	6.76588	6.81379	6.97658	7.13442	[K].KQELANSSDVTLPDRPLSPPLTAPPTMK.[S]	1xPhospho [S18]; 1xOxidation [M27]; 2xTMTpro [K1; K28]; 1xTMTpro [N-Term]	Q5SVL6 [9-36]	Q5SVL6 1xPhospho [S26]	1	TLPDRPLsPPLTAPP	Rap1gap2
Q5SVL6	sGLFPR.Q5SVL6	3	sGLFPR	2.92e-06	5.43932	5.30848	5.49996	5.81375	5.80227	5.91425	6.19991	6.03603	6.44442	6.08319	6.44417	6.81268	7.07507	6.763	6.99397	6.99082	6.70429	6.48703	6.74319	6.5945	[R].SGLFPR.[L]	1xPhospho [S1]; 1xTMTpro [N-Term]	Q5SVL6 [545-550]	Q5SVL6 1xPhospho [S545]	1	_______sGLFPR__	Rap1gap2
Q5SW75	AITELVsPDIImQSHSENAISVk.Q5SW75	2	AITELVsPDIImQSHSENAISVk	0.0147631	4.27469	3.42593	4.09035	2.67355	3.67077	3.96433	3.88235	3.87875	4.14536	4.06337	3.40063	2.5891	3.59569	3.68017	3.63171	2.81898	2.86751	3.06126	3.27593	2.91873	[K].AITELVSPDIIMQSHSENAISVK.[E]	1xPhospho [S7]; 1xOxidation [M12]; 1xTMTpro [K23]; 1xTMTpro [N-Term]	Q5SW75 [728-750]	Q5SW75 1xPhospho [S734]	1	_AITELVsPDIIMQS	Ssh2
Q5SW75	sISESFLTVk.Q5SW75	5	sISESFLTVk	0.00329464	3.3812	3.2758	3.94078	3.82107	3.52832	2.96456	3.41182	3.32204	3.69753	3.21604	2.96812	2.59673	2.26419	3.22947	3.16835	2.79571	2.92014	2.1523	2.35727	3.00715	[R].SISESFLTVK.[G]	1xPhospho [S1]; 1xTMTpro [K10]; 1xTMTpro [N-Term]	Q5SW75 [36-45]	Q5SW75 1xPhospho [S36]	1	_______sISESFLT	Ssh2
Q5SW75	SAsLAk.Q5SW75	5	SAsLAk	3.71e-06	7.26792	7.4287	7.35952	7.21353	7.27595	7.19008	7.26603	6.64218	7.51989	7.52694	6.64068	6.95007	6.65036	6.54599	6.6841	5.56787	6.00831	6.33922	5.91329	5.73599	[R].SASLAK.[L]	1xPhospho [S3]; 1xTMTpro [K6]; 1xTMTpro [N-Term]	Q5SW75 [1257-1262]	Q5SW75 1xPhospho [S1259]	1	_____SAsLAK____	Ssh2
Q5SW75	IPHSSsSENIR.Q5SW75	2	IPHSSsSENIR	0.0350722	6.09866	6.00969	6.31202	6.24152	5.84457	5.91197	6.64386	6.87932	6.92464	6.31104	5.70161	5.69422	6.38993	6.51591	6.44533	5.75962	5.87486	5.73758	5.95377	5.89688	[R].IPHSSSSENIR.[D]	1xPhospho [S6]; 1xTMTpro [N-Term]	Q5SW75 [1212-1222]	Q5SW75 1xPhospho [S1217]	1	__IPHSSsSENIR__	Ssh2
Q5SWP3	EFPALEQkDEDsLEEDAQRAPGSGQR.Q5SWP3	1	EFPALEQkDEDsLEEDAQRAPGSGQR	0.00918533	4.93312	4.91559	5.00639	5.10831	5.35514	4.72755	4.51953	4.21135	4.49304	5.01764	4.14693	4.60395	4.95366	4.42993	4.28717	4.11716	4.62092	4.26561	4.66987	4.41095	[R].EFPALEQKDEDSLEEDAQRAPGSGQR.[W]	1xPhospho [S12]; 1xTMTpro [K8]; 1xTMTpro [N-Term]	Q5SWP3 [1257-1282]	Q5SWP3 1xPhospho [S1268]	1	LEQKDEDsLEEDAQR	Nacad
Q5SXA9	LQALRsLSGTPR.Q5SXA9	5	LQALRsLSGTPR	0.000482941	4.97695	5.3016	5.21627	5.18289	5.57689	5.5879	4.57722	4.39833	5.09209	5.40662	5.02505	4.6678	4.369	4.80038	3.83528	3.55819	3.46563	4.05871	4.20726	3.77317	[R].LQALRSLSGTPR.[S]	1xPhospho [S6]; 1xTMTpro [N-Term]	Q5SXA9 [518-529]	Q5SXA9 1xPhospho [S523]	1	__LQALRsLSGTPR_	Wwc1
Q5SXA9	sLSGTPR.Q5SXA9	2	sLSGTPR	0.0009922	6.38777	6.40351	6.5175	6.37147	6.54349	6.5842	7.08104	7.51665	7.4754	6.88287	6.39111	5.92039	6.96734	7.01584	6.60403	6.07856	5.97208	5.95301	6.06279	6.02339	[R].SLSGTPR.[S]	1xPhospho [S1]; 1xTMTpro [N-Term]	Q5SXA9 [523-529]	Q5SXA9 1xPhospho [S523]	1	_______sLSGTPR_	Wwc1
Q5SXA9	LNRSDsDSSTLSk.Q5SXA9	2	LNRSDsDSSTLSk	5.74e-07	8.10779	7.97868	8.17897	8.18477	8.27962	8.52592	8.41691	8.12376	8.39561	8.66184	8.40995	7.77262	8.01575	8.26284	7.91988	7.20965	7.10534	7.20171	7.15126	7.23182	[R].LNRSDSDSSTLSK.[K]	1xPhospho [S6]; 1xTMTpro [K13]; 1xTMTpro [N-Term]	Q5SXA9 [934-946]	Q5SXA9 1xPhospho [S939]	1	__LNRSDsDSSTLSK	Wwc1
Q60575	IVEGQGQSSEVIsPPEEVNR.Q60575	1	IVEGQGQSSEVIsPPEEVNR	0.000502543	5.72504	5.76046	6.33231	6.05258	5.99023	5.5984	5.5946	5.52923	5.41075	5.7313	5.27612	5.28621	5.48493	5.40844	5.61051	5.41036	5.44709	5.45217	5.60451	5.38827	[R].IVEGQGQSSEVISPPEEVNR.[M]	1xPhospho [S13]; 1xTMTpro [N-Term]	Q60575 [1063-1082]	Q60575 1xPhospho [S1075]	1	GQSSEVIsPPEEVNR	Kif1b
Q60575	SGLsLEELR.Q60575	7	SGLsLEELR	0.247388	7.9573	7.90219	7.6717	7.75619	7.71098	7.80622	8.18474	8.19106	8.13235	8.02197	7.80711	7.40848	7.95755	8.13663	8.11274	7.79013	7.90483	7.59425	7.9595	8.05128	[R].SGLSLEELR.[I]	1xPhospho [S4]; 1xTMTpro [N-Term]	Q60575 [1054-1062]	Q60575 1xPhospho [S1057]	1	____SGLsLEELR__	Kif1b
Q60575	mADTGsPGmQR.Q60575	5	mADTGsPGmQR	0.0102571	5.45778	5.27064	5.59296	5.51731	5.52415	5.44055	5.31509	5.29983	5.60916	5.65217	5.11047	5.1629	5.34736	5.65766	4.90667	5.0214	4.74503	4.7329	5.00616	5.35136	[K].MADTGSPGMQR.[R]	1xPhospho [S6]; 2xOxidation [M1; M9]; 1xTMTpro [N-Term]	Q60575 [1449-1459]	Q60575 1xPhospho [S1454]	1	__MADTGsPGMQR__	Kif1b
Q60598	AkkQtPPASPSPQPIEDRPPSSPIYEDAAPFk.Q60598	4	AkkQtPPASPSPQPIEDRPPSSPIYEDAAPFk	0.0027984	5.53608	5.61283	5.47907	4.9402	5.37671	5.86668	6.54918	6.83745	6.37595	6.26338	6.09571	5.7401	6.55769	6.61127	6.88677	6.57554	6.25417	5.78033	6.93619	6.67144	[R].AKKQTPPASPSPQPIEDRPPSSPIYEDAAPFK.[A]	2xPhospho [T5; S/Y]; 3xTMTpro [K2; K3; K32]; 1xTMTpro [N-Term]	Q60598 [397-428]	Q60598 2xPhospho [T401; S/Y]	1	___AKKQtPPASPSP	Cttn
Q60668	NEEDEGHSNSsPR.Q60668	1	NEEDEGHSNSsPR	0.0347636	5.93018	5.40974	6.13723	6.42421	5.15198	4.61922	4.86841	5.0614	5.16317	4.56042	4.71988	3.97296	5.62878	5.20984	5.4274	5.49297	4.60731	4.39879	5.00239	5.13681	[K].NEEDEGHSNSSPR.[H]	1xPhospho [S11]; 1xTMTpro [N-Term]	Q60668 [73-85]	Q60668 1xPhospho [S83]	1	DEGHSNSsPR_____	Hnrnpd
Q60829	VSEHSsPEEEASPHQR.Q60829	6	VSEHSsPEEEASPHQR	0.00473652	5.38366	5.26334	5.18241	5.88421	5.88961	5.22075	5.04137	5.09271	5.35798	5.45035	5.61888	6.11189	6.30964	6.15797	5.76578	5.9489	5.47589	6.08847	5.63542	5.72587	[R].VSEHSSPEEEASPHQR.[T]	1xPhospho [S6]; 1xTMTpro [N-Term]	Q60829 [41-56]	Q60829 1xPhospho [S46]	1	__VSEHSsPEEEASP	Ppp1r1b
Q60829	AVQHLQTISNLSENQAsEEEDELGELR.Q60829	1	AVQHLQTISNLSENQAsEEEDELGELR	0.00506077	5.51567	5.23821	5.59481	5.35962	5.29059	4.94305	4.65434	4.73098	5.19692	5.10197	4.30682	5.18798	5.18154	4.7676	4.63005	4.60854	4.82866	4.5241	4.61822	4.97806	[K].AVQHLQTISNLSENQASEEEDELGELR.[E]	1xPhospho [S17]; 1xTMTpro [N-Term]	Q60829 [81-107]	Q60829 1xPhospho [S97]	1	NLSENQAsEEEDELG	Ppp1r1b
Q60829	ATLSEPGEEPQHPsPP.Q60829	8	ATLSEPGEEPQHPsPP	0.00613263	6.09955	6.30539	6.01122	6.18356	6.52934	6.12755	5.85031	6.01546	6.2674	6.39193	6.3191	7.07634	7.52784	6.73731	6.71268	6.24812	6.1217	6.40083	6.57599	6.35387	[R].ATLSEPGEEPQHPSPP.[-]	1xPhospho [S14]; 1xTMTpro [N-Term]	Q60829 [179-194]	Q60829 1xPhospho [S192]	1	GEEPQHPsPP_____	Ppp1r1b
Q60875	AAVASVtPEkQATELALLQR.Q60875	NA	AAVASVtPEkQATELALLQR	0.589132	5.17115	4.99774	5.92341	5.84799	5.99518	5.13838	4.99199	5.41609	5.61806	5.66634	5.67853	5.49839	5.54926	5.55172	5.4808	4.51008	5.50692	5.57403	5.5882	5.38793	[R].AAVASVTPEKQATELALLQR.[Q]	1xPhospho [T7]; 1xTMTpro [K10]; 1xTMTpro [N-Term]	Q60875 [789-808]	Q60875 1xPhospho [T795]	1	_AAVASVtPEKQATE	Arhgef2
Q60875	LsPPHSPR.Q60875	6	LsPPHSPR	0.000979998	3.66233	3.56336	4.24665	3.86974	3.33237	3.09827	2.6481	3.45651	3.46364	3.46853	3.98092	4.59725	4.16413	3.84177	4.60976	4.09391	4.13673	4.20539	4.27366	4.82125	[R].LSPPHSPR.[D]	1xPhospho [S2]; 1xTMTpro [N-Term]	Q60875 [954-961]	Q60875 1xPhospho [S955]	1	______LsPPHSPR_	Arhgef2
Q60875	LQDSSDPDTGSEEEVSSRLsPPHSPR.Q60875	4	LQDSSDPDTGSEEEVSSRLsPPHSPR	0.0202174	6.0494	6.17724	6.04602	5.9833	5.71027	6.1304	6.33449	6.26642	6.25433	6.20443	5.98549	6.29762	6.83923	6.6353	6.9832	6.2292	6.3781	6.257	6.60867	6.4415	[R].LQDSSDPDTGSEEEVSSRLSPPHSPR.[D]	1xPhospho [S20]; 1xTMTpro [N-Term]	Q60875 [936-961]	Q60875 1xPhospho [S955]	1	EEVSSRLsPPHSPR_	Arhgef2
Q60875	LEsFESLR.Q60875	3	LEsFESLR	0.00839335	5.68744	5.69397	6.1358	5.95852	5.50896	5.76853	5.64603	6.25312	6.08231	5.61127	5.93342	6.33206	7.05126	6.65277	7.11172	6.46255	6.49945	5.9005	6.89552	6.36433	[R].LESFESLR.[G]	1xPhospho [S3]; 1xTMTpro [N-Term]	Q60875 [644-651]	Q60875 1xPhospho [S646]	1	_____LEsFESLR__	Arhgef2
Q60875	ANsRDGEAGR.Q60875	8	ANsRDGEAGR	1.38e-06	6.28232	6.68884	7.03999	6.8206	6.65682	7.67844	7.41689	7.79279	7.85485	8.07428	8.20269	8.78997	9.30265	8.81283	8.90116	7.76267	8.0797	7.96666	8.52539	8.28389	[R].ANSRDGEAGR.[A]	1xPhospho [S3]; 1xTMTpro [N-Term]	Q60875 [779-788]	Q60875 1xPhospho [S781]	1	_____ANsRDGEAGR	Arhgef2
Q60875	LEsFESLRGER.Q60875	3	LEsFESLRGER	0.00463717	6.10322	6.35848	7.15227	7.17473	7.28189	6.91279	7.16414	7.61868	7.2269	7.35976	7.36116	7.46067	7.72046	7.72185	7.9808	7.63725	7.64196	7.51867	7.85764	7.69411	[R].LESFESLRGER.[L]	1xPhospho [S3]; 1xTMTpro [N-Term]	Q60875 [644-654]	Q60875 1xPhospho [S646]	1	_____LEsFESLRGE	Arhgef2
Q60902	GIDPPQVLsPDmVPPSER.Q60902	1	GIDPPQVLsPDmVPPSER	0.00235293	6.1714	6.35871	6.25152	6.12145	6.57915	6.07111	5.85595	5.75073	6.05246	6.03133	5.69225	5.79862	5.68329	5.62436	5.78337	5.71283	5.6683	5.65187	5.92917	6.31909	[K].GIDPPQVLSPDMVPPSER.[G]	1xPhospho [S9]; 1xOxidation [M12]; 1xTMTpro [N-Term]	Q60902 [345-362]	Q60902 1xPhospho [S353]	1	IDPPQVLsPDMVPPS	Eps15l1
Q60902	STPSHGSVSSLNSTGSLsPk.Q60902	NA	STPSHGSVSSLNSTGSLsPk	0.926078	5.95322	6.0147	6.00398	6.28337	6.22674	6.00427	6.09704	5.90299	6.14081	6.29669	5.78322	5.92515	6.21459	6.21219	6.16391	6.11906	6.02184	6.00032	6.24028	6.26237	[R].STPSHGSVSSLNSTGSLSPK.[H]	1xPhospho [S18]; 1xTMTpro [K20]; 1xTMTpro [N-Term]	Q60902 [238-257]	Q60902 1xPhospho [S255]	1	LNSTGSLsPK_____	Eps15l1
Q60902	TVFAGAVPVLPAsPPPk.Q60902	2	TVFAGAVPVLPAsPPPk	0.0654191	3.92818	3.82845	3.61464	3.5859	3.53597	3.72532	3.76082	3.54104	3.45939	2.81285	2.62003	3.03932	3.71153	3.25089	3.30284	3.02278	3.23266	2.7347	3.34816	3.40203	[K].TVFAGAVPVLPASPPPK.[D]	1xPhospho [S13]; 1xTMTpro [K17]; 1xTMTpro [N-Term]	Q60902 [217-233]	Q60902 1xPhospho [S229]	1	AVPVLPAsPPPK___	Eps15l1
Q60932	LTFDSSFsPNTGkk.Q60932	3	LTFDSSFsPNTGkk	2.62e-05	7.39561	7.41891	7.71252	7.73037	7.51758	7.83694	7.89167	7.95286	7.79698	7.91691	8.36536	7.931	8.66569	8.40722	9.21928	9.43496	8.73076	8.64028	9.42494	9.47456	[K].LTFDSSFSPNTGKK.[N]	1xPhospho [S8]; 2xTMTpro [K13; K14]; 1xTMTpro [N-Term]	Q60932 [110-123]	Q60932 1xPhospho [S117]	1	LTFDSSFsPNTGKK_	Vdac1
Q60932	LTFDSSFsPNTGk.Q60932	4	LTFDSSFsPNTGk	0.0115058	4.12605	3.72591	4.10711	4.02911	3.48667	3.78166	3.40319	3.98164	4.12944	3.71173	3.81589	3.98862	4.52428	4.27058	4.15751	5.02007	4.44922	3.9529	5.06879	4.51163	[K].LTFDSSFSPNTGK.[K]	1xPhospho [S8]; 1xTMTpro [K13]; 1xTMTpro [N-Term]	Q60932 [110-122]	Q60932 1xPhospho [S117]	1	LTFDSSFsPNTGK__	Vdac1
Q61037	sPSGLRPR.Q61037	2	sPSGLRPR	0.080207	7.39935	7.33537	7.60909	7.45352	7.22719	7.20414	7.82831	8.22483	7.73235	7.26903	6.97928	6.50732	7.55205	7.70271	7.33919	7.07722	6.96986	6.679	7.25393	7.15267	[R].SPSGLRPR.[G]	1xPhospho [S1]; 1xTMTpro [N-Term]	Q61037 [1455-1462]	Q61037 1xPhospho [S1455]	1	_______sPSGLRPR	Tsc2
Q61037	SQsGILDGEAATWSATGEESR.Q61037	1	SQsGILDGEAATWSATGEESR	0.00219912	4.84893	4.97989	4.90412	4.80279	4.95331	4.59115	4.41289	4.42491	4.68229	4.61522	4.09789	4.39748	4.36594	4.64928	4.13939	3.85836	4.47684	3.99115	4.48447	4.57253	[R].SQSGILDGEAATWSATGEESR.[I]	1xPhospho [S3]; 1xTMTpro [N-Term]	Q61037 [1419-1439]	Q61037 1xPhospho [S1421]	1	_____SQsGILDGEA	Tsc2
Q61037	SmsGGHGLR.Q61037	8	SmsGGHGLR	0.0107487	5.40939	5.67879	5.47292	5.7102	5.78458	6.13948	5.97289	5.46719	6.2453	6.19199	5.88477	6.33006	6.62377	6.24186	6.09622	5.95392	5.84646	5.80047	6.16914	6.02427	[R].SMSGGHGLR.[V]	1xPhospho [S3]; 1xOxidation [M2]; 1xTMTpro [N-Term]	Q61037 [1130-1138]	Q61037 1xPhospho [S1132]	1	_____SMsGGHGLR_	Tsc2
Q61037	IDIGRLsPEAk.Q61037	7	IDIGRLsPEAk	0.224598	7.49854	7.1607	7.33987	7.13839	6.99994	7.04716	7.54084	7.94836	7.84972	7.42462	6.81057	6.81023	7.30074	7.40506	7.5493	7.36123	7.50774	6.96018	7.49419	7.40688	[K].IDIGRLSPEAK.[V]	1xPhospho [S7]; 1xTMTpro [K11]; 1xTMTpro [N-Term]	Q61037 [1406-1416]	Q61037 1xPhospho [S1412]	1	_IDIGRLsPEAK___	Tsc2
Q61037	SIsVSEHVVR.Q61037	5	SIsVSEHVVR	0.0230335	5.80907	5.54483	5.36223	5.71717	6.00945	5.67847	5.15911	5.00066	5.63176	5.54154	5.6502	5.1068	5.41969	5.74268	5.42117	5.17936	5.03245	4.88668	5.04424	5.36836	[R].SISVSEHVVR.[S]	1xPhospho [S3]; 1xTMTpro [N-Term]	Q61037 [979-988]	Q61037 1xPhospho [S981]	1	_____SIsVSEHVVR	Tsc2
Q61037	ITVPPEGPLPSSSPRsPSGLRPR.Q61037	NA	ITVPPEGPLPSSSPRsPSGLRPR	0.203802	4.70669	4.9472	5.22079	5.43638	5.53927	4.91224	4.88441	4.73326	5.03348	5.03923	4.6062	4.98752	4.81013	4.88602	5.12352	5.10566	4.90672	4.72529	4.97074	4.82156	[R].ITVPPEGPLPSSSPRSPSGLRPR.[G]	1xPhospho [S16]; 1xTMTpro [N-Term]	Q61037 [1440-1462]	Q61037 1xPhospho [S1455]	1	LPSSSPRsPSGLRPR	Tsc2
Q61037	ASGPLsPPTGPPSPVPmGPAVR.Q61037	NA	ASGPLsPPTGPPSPVPmGPAVR	0.113851	5.55082	5.56827	5.38345	5.94037	5.7783	5.39275	5.34922	5.20409	5.37142	5.73465	5.23221	5.38017	5.30115	5.44101	5.286	5.15316	5.24608	5.29256	5.59375	5.70323	[K].ASGPLSPPTGPPSPVPMGPAVR.[L]	1xPhospho [S6]; 1xOxidation [M17]; 1xTMTpro [N-Term]	Q61037 [659-680]	Q61037 1xPhospho [S664]	1	__ASGPLsPPTGPPS	Tsc2
Q61037	kASGPLsPPTGPPSPVPmGPAVR.Q61037	1	kASGPLsPPTGPPSPVPmGPAVR	0.000172621	7.07479	7.15764	7.05578	7.25399	7.36287	6.94685	6.75109	6.61865	6.76293	6.96836	6.56667	6.53411	6.65945	6.8236	6.77647	6.70654	6.73401	6.81448	6.71614	6.91586	[K].KASGPLSPPTGPPSPVPMGPAVR.[L]	1xPhospho [S7]; 1xOxidation [M18]; 1xTMTpro [K1]; 1xTMTpro [N-Term]	Q61037 [658-680]	Q61037 1xPhospho [S664]	1	_KASGPLsPPTGPPS	Tsc2
Q61097	TDVLGVHEAEAEEPEAGksEAEDDEEDEVDDLPSSR.Q61097	NA	TDVLGVHEAEAEEPEAGksEAEDDEEDEVDDLPSSR	0.361126	4.12392	4.20225	4.03508	4.32431	3.83786	3.9634	4.60711	4.82816	4.6747	3.98094	3.9503	4.10239	4.18175	4.26941	4.92004	4.02316	3.82599	3.62634	4.38713	4.36871	[K].TDVLGVHEAEAEEPEAGKSEAEDDEEDEVDDLPSSR.[R]	1xPhospho [S19]; 1xTMTpro [K18]; 1xTMTpro [N-Term]	Q61097 [500-535]	Q61097 1xPhospho [S518]	1	EEPEAGKsEAEDDEE	Ksr1
Q61097	SksHESQLGNR.Q61097	NA	SksHESQLGNR	0.506541	5.29793	5.12327	4.87769	5.95438	5.16504	5.26179	5.82555	5.72438	5.59116	5.84673	4.92531	4.78974	6.08442	5.54937	5.7447	5.55317	5.43276	5.24925	5.5139	5.26599	[R].SKSHESQLGNR.[I]	1xPhospho [S3]; 1xTMTpro [K2]; 1xTMTpro [N-Term]	Q61097 [295-305]	Q61097 1xPhospho [S297]	1	_____SKsHESQLGN	Ksr1
Q61136	ARsPAEEk.Q61136	6	ARsPAEEk	0.00195729	6.89996	6.93943	7.22106	7.46329	7.00763	6.54513	6.52812	6.30668	6.33996	6.58853	6.23614	6.16041	6.76641	6.76786	6.78302	6.5071	6.61495	6.63122	6.58482	6.76998	[K].ARSPAEEK.[M]	1xPhospho [S3]; 1xTMTpro [K8]; 1xTMTpro [N-Term]	Q61136 [256-263]	Q61136 1xPhospho [S258]	1	_____ARsPAEEK__	Prpf4b
Q61136	kksPIVNER.Q61136	1	kksPIVNER	3.06e-05	8.50631	8.62263	8.78633	8.93263	8.98425	7.8886	7.69048	7.37372	7.88282	7.853	7.65665	7.56999	8.144	7.95104	8.17826	7.6496	7.76339	8.09029	7.92805	7.96275	[R].KKSPIVNER.[S]	1xPhospho [S3]; 2xTMTpro [K1; K2]; 1xTMTpro [N-Term]	Q61136 [276-284]	Q61136 1xPhospho [S278]	1	_____KKsPIVNER_	Prpf4b
Q61136	LcDFGSASHVADNDITPyLVSR.Q61136	1	LcDFGSASHVADNDITPyLVSR	0.00336231	5.20672	5.27052	5.51979	5.61935	5.20791	4.76147	4.22506	4.16919	5.12693	5.08796	4.33267	4.32396	4.71095	4.73643	4.78553	4.41111	4.37304	4.84124	4.82027	4.2881	[K].LCDFGSASHVADNDITPYLVSR.[F]	1xCarbamidomethyl [C2]; 1xPhospho [Y18]; 1xTMTpro [N-Term]	Q61136 [832-853]	Q61136 1xPhospho [Y849]	1	ADNDITPyLVSR___	Prpf4b
Q61140	VGQGYVYEAAQTEQDEyDTPR.Q61140	5	VGQGYVYEAAQTEQDEyDTPR	0.0113925	4.76326	4.9655	4.95217	5.1402	5.14892	4.83261	4.76465	4.80585	4.90318	4.77307	4.57701	4.66675	4.74688	4.76917	4.8248	3.94352	4.71074	4.38694	4.54763	4.82322	[R].VGQGYVYEAAQTEQDEYDTPR.[H]	1xPhospho [Y17]; 1xTMTpro [N-Term]	Q61140 [222-242]	Q61140 1xPhospho [Y238]	1	AQTEQDEyDTPR___	Bcar1
Q61140	HLLAPGPQDIyDVPPVR.Q61140	1	HLLAPGPQDIyDVPPVR	0.0261275	5.82323	5.80075	5.78954	5.95369	5.81494	5.67813	5.50092	5.39429	5.60022	5.61461	5.42354	5.24358	5.64258	5.71978	5.57652	5.24173	5.3704	5.25939	5.84753	5.61062	[R].HLLAPGPQDIYDVPPVR.[G]	1xPhospho [Y11]; 1xTMTpro [N-Term]	Q61140 [243-259]	Q61140 1xPhospho [Y253]	1	APGPQDIyDVPPVR_	Bcar1
Q61165	IGsDPLAYEPk.Q61165	3	IGsDPLAYEPk	1.04e-05	4.49477	4.43173	4.75012	5.06787	4.86491	5.50266	5.22723	5.72309	5.3663	5.51516	5.86904	5.11627	6.18167	5.8547	5.81839	6.68463	6.24434	5.97155	6.63842	6.78971	[R].IGSDPLAYEPK.[A]	1xPhospho [S3]; 1xTMTpro [K11]; 1xTMTpro [N-Term]	Q61165 [705-715]	Q61165 1xPhospho [S707]	1	_____IGsDPLAYEP	Slc9a1
Q61234	QPSsPGPQPR.Q61234	6	QPSsPGPQPR	0.00931419	4.84641	5.22537	5.41567	5.33674	4.72109	4.77674	4.69548	4.7219	4.63778	4.82854	4.94594	4.79064	4.96997	5.12567	5.37069	5.21833	5.11493	5.21907	5.53208	5.77564	[R].QPSSPGPQPR.[N]	1xPhospho [S4]; 1xTMTpro [N-Term]	Q61234 [192-201]	Q61234 1xPhospho [S195]	1	____QPSsPGPQPR_	Snta1
Q61290	SFsTIR.Q61290	2	SFsTIR	0.00531183	7.90259	7.74509	7.91606	7.74788	7.78194	7.76192	8.114	7.68154	8.32003	8.04068	7.52781	7.04112	8.15292	7.60084	7.32979	7.41298	7.23593	6.98413	7.4388	7.2777	[R].SFSTIR.[D]	1xPhospho [S3]; 1xTMTpro [N-Term]	Q61290 [1980-1985]	Q61290 1xPhospho [S1982]	1	_____SFsTIR____	Cacna1e
Q61290	FGEAVVVGRPGsGDGDSDQSR.Q61290	6	FGEAVVVGRPGsGDGDSDQSR	0.0237333	6.50278	6.74363	6.88821	6.85802	6.89527	6.66626	6.59491	6.68142	6.91227	6.85022	6.93856	6.86744	7.25934	7.11012	6.86145	6.81117	6.97396	7.03652	7.24657	7.34985	[R].FGEAVVVGRPGSGDGDSDQSR.[N]	1xPhospho [S12]; 1xTMTpro [N-Term]	Q61290 [4-24]	Q61290 1xPhospho [S15]	1	VVVGRPGsGDGDSDQ	Cacna1e
Q61290	GGsLkGDIGGLTSALDNQR.Q61290	NA	GGsLkGDIGGLTSALDNQR	0.588507	4.82443	4.84135	4.96989	5.17671	5.29116	4.70264	4.77654	4.47166	5.34206	5.00455	4.52449	5.09659	5.36411	4.90321	5.10809	4.73553	4.99747	4.80531	4.89992	4.7153	[R].GGSLKGDIGGLTSALDNQR.[S]	1xPhospho [S3]; 1xTMTpro [K5]; 1xTMTpro [N-Term]	Q61290 [854-872]	Q61290 1xPhospho [S856]	1	_____GGsLKGDIGG	Cacna1e
Q61290	kHLLsPDVSR.Q61290	NA	kHLLsPDVSR	0.260873	6.6572	6.74135	6.83257	7.16634	7.22167	6.92147	7.35154	7.4798	7.23308	7.22227	7.12057	6.65951	7.21076	7.35981	7.22252	7.12919	6.92356	6.96322	7.38957	7.28518	[R].KHLLSPDVSR.[C]	1xPhospho [S5]; 1xTMTpro [K1]; 1xTMTpro [N-Term]	Q61290 [2050-2059]	Q61290 1xPhospho [S2054]	1	___KHLLsPDVSR__	Cacna1e
Q61290	HLLsPDVSR.Q61290	NA	HLLsPDVSR	0.295029	5.2379	5.0681	5.28945	5.4425	5.08389	5.31297	5.36706	5.72706	5.45396	5.55558	5.45958	4.92515	5.97837	5.72487	5.38382	5.52326	5.44306	5.15955	5.74888	5.77433	[K].HLLSPDVSR.[C]	1xPhospho [S4]; 1xTMTpro [N-Term]	Q61290 [2051-2059]	Q61290 1xPhospho [S2054]	1	____HLLsPDVSR__	Cacna1e
Q61290	GTQADWEsPERR.Q61290	NA	GTQADWEsPERR	0.151822	5.0607	5.30586	5.24774	5.30206	4.99541	4.78909	4.7064	4.99653	5.31219	5.30223	5.02141	5.08801	5.17966	5.51986	5.45904	5.24145	5.10791	5.26414	5.75602	5.66476	[R].GTQADWESPERR.[Q]	1xPhospho [S8]; 1xTMTpro [N-Term]	Q61290 [2066-2077]	Q61290 1xPhospho [S2073]	1	GTQADWEsPERR___	Cacna1e
Q61301	HIsPVQALSEFk.Q61301	5	HIsPVQALSEFk	1.18e-06	6.37892	6.24209	6.12229	6.03502	6.23865	5.97945	5.93033	5.69232	5.97283	6.0679	5.50983	4.72919	4.95346	5.2779	5.49489	4.95006	4.86543	4.90306	4.88596	5.1385	[K].HISPVQALSEFK.[A]	1xPhospho [S3]; 1xTMTpro [K12]; 1xTMTpro [N-Term]	Q61301 [937-948]	Q61301 1xPhospho [S939]	1	_____HIsPVQALSE	Ctnna2
Q61301	QVQEAIAGISSAAQATsPTDEAk.Q61301	4	QVQEAIAGISSAAQATsPTDEAk	0.000421769	5.39316	5.14229	5.76211	5.72091	5.6167	5.8589	6.01779	6.18777	5.86718	5.81814	6.00063	5.75919	6.05054	6.17816	6.30503	6.2944	6.26433	6.20913	6.2135	6.16172	[K].QVQEAIAGISSAAQATSPTDEAK.[G]	1xPhospho [S17]; 1xTMTpro [K23]; 1xTMTpro [N-Term]	Q61301 [246-268]	Q61301 1xPhospho [S262]	1	SSAAQATsPTDEAK_	Ctnna2
Q61301	TPEELEDDsDFEQEDYDVR.Q61301	5	TPEELEDDsDFEQEDYDVR	0.00492533	7.01259	7.19029	7.06139	6.83456	6.92094	6.82245	6.60821	6.42812	6.97449	7.0464	6.54904	6.71083	6.47663	6.6775	6.91848	6.24388	6.44362	6.52365	6.57383	6.58789	[R].TPEELEDDSDFEQEDYDVR.[S]	1xPhospho [S9]; 1xTMTpro [N-Term]	Q61301 [632-650]	Q61301 1xPhospho [S640]	1	PEELEDDsDFEQEDY	Ctnna2
Q61315	EAPsPTLR.Q61315	2	EAPsPTLR	1.22e-05	8.42019	8.14734	8.19129	8.60876	8.43432	8.50237	8.42906	8.51599	8.67685	8.79806	8.35041	7.75757	8.52034	8.46053	8.10884	7.36742	7.40577	7.46318	7.64641	7.5494	[K].EAPSPTLR.[R]	1xPhospho [S4]; 1xTMTpro [N-Term]	Q61315 [2446-2453]	Q61315 1xPhospho [S2449]	1	____EAPsPTLR___	Apc
Q61315	NDsLSSLDFDDDDVDLSREk.Q61315	5	NDsLSSLDFDDDDVDLSREk	0.0766609	5.73009	5.67297	6.10617	6.34236	6.50511	6.14231	5.93388	5.2515	5.92592	6.60183	6.05997	5.72149	5.56446	5.57829	5.57687	5.60459	5.71453	5.6907	5.09235	5.18686	[R].NDSLSSLDFDDDDVDLSREK.[A]	1xPhospho [S3]; 1xTMTpro [K20]; 1xTMTpro [N-Term]	Q61315 [1857-1876]	Q61315 1xPhospho [S1859]	1	_____NDsLSSLDFD	Apc
Q61315	SELsPITR.Q61315	2	SELsPITR	2.64e-06	7.73759	7.71255	7.9249	8.01074	8.01599	7.64726	7.66732	7.77741	7.8568	8.04185	7.58404	7.09276	7.60399	7.53561	7.41904	6.81791	6.95548	6.9854	6.89783	7.06998	[K].SELSPITR.[Q]	1xPhospho [S4]; 1xTMTpro [N-Term]	Q61315 [2280-2287]	Q61315 1xPhospho [S2283]	1	____SELsPITR___	Apc
Q61315	LQASGLsSESTR.Q61315	4	LQASGLsSESTR	0.00111088	7.07095	6.96937	6.89607	7.08382	6.98178	7.62395	7.80502	7.71905	8.01558	7.87668	7.50688	7.43455	8.38089	8.45818	7.80543	7.40392	7.60508	7.4948	8.00129	7.49347	[R].LQASGLSSESTR.[H]	1xPhospho [S7]; 1xTMTpro [N-Term]	Q61315 [1335-1346]	Q61315 1xPhospho [S1341]	1	_LQASGLsSESTR__	Apc
Q61315	QSVGSGsPVQTVGLETR.Q61315	2	QSVGSGsPVQTVGLETR	4.93e-06	7.93975	7.75407	7.93665	8.11937	7.99984	7.91829	7.94563	7.95172	8.08796	8.34866	7.74789	7.50162	7.81641	7.94036	7.805	7.20664	7.28359	7.32669	7.20608	7.24975	[K].QSVGSGSPVQTVGLETR.[L]	1xPhospho [S7]; 1xTMTpro [N-Term]	Q61315 [2707-2723]	Q61315 1xPhospho [S2713]	1	_QSVGSGsPVQTVGL	Apc
Q61315	SGAQTPksPPEHYVQETPLVFSR.Q61315	8	SGAQTPksPPEHYVQETPLVFSR	0.0406605	5.81846	6.47978	6.28553	6.48392	6.33089	6.25092	6.22401	6.26542	6.34796	6.56869	6.18871	6.66428	6.43629	6.49463	6.70322	5.98701	6.04048	6.18154	5.89183	6.25879	[K].SGAQTPKSPPEHYVQETPLVFSR.[C]	1xPhospho [S8]; 1xTMTpro [K7]; 1xTMTpro [N-Term]	Q61315 [1363-1385]	Q61315 1xPhospho [S1370]	1	SGAQTPKsPPEHYVQ	Apc
Q61315	SPSEGPGATTsPR.Q61315	2	SPSEGPGATTsPR	0.0689799	6.69252	6.27828	6.74167	6.63018	6.26565	6.26945	6.58939	6.94762	6.61641	6.57158	6.20751	5.88797	6.67726	6.76316	6.6661	5.99559	6.07838	5.91114	6.35624	6.22719	[K].SPSEGPGATTSPR.[G]	1xPhospho [S11]; 1xTMTpro [N-Term]	Q61315 [2260-2272]	Q61315 1xPhospho [S2270]	1	EGPGATTsPR_____	Apc
Q61315	TGsSSSILSASSESSEk.Q61315	5	TGsSSSILSASSESSEk	8.89e-05	7.34362	7.29032	7.66336	7.58389	7.71326	7.23151	7.49283	7.28917	7.85352	7.75874	6.83717	6.92012	7.22634	6.85246	7.09187	6.57165	6.80597	6.82686	6.92716	6.75999	[R].TGSSSSILSASSESSEK.[A]	1xPhospho [S3]; 1xTMTpro [K17]; 1xTMTpro [N-Term]	Q61315 [2567-2583]	Q61315 1xPhospho [S2569]	1	_____TGsSSSILSA	Apc
Q61315	RTGsSSSILSASSESSEk.Q61315	5	RTGsSSSILSASSESSEk	4.1e-05	7.68784	7.63231	7.62991	7.66957	7.87565	7.53509	7.54696	7.1674	8.00337	8.01626	7.12702	7.17234	7.71269	7.38584	7.09497	6.55386	6.70893	6.82611	6.65081	6.50517	[R].RTGSSSSILSASSESSEK.[A]	1xPhospho [S4]; 1xTMTpro [K18]; 1xTMTpro [N-Term]	Q61315 [2566-2583]	Q61315 1xPhospho [S2569]	1	____RTGsSSSILSA	Apc
Q61315	LNsFVQVEAPEQk.Q61315	5	LNsFVQVEAPEQk	1.02e-07	5.80291	5.22649	5.73345	5.80331	5.71666	4.99444	4.91815	4.39241	4.98517	4.9971	4.49589	4.26062	4.56301	4.41085	4.39675	3.58242	3.72173	4.01859	3.97099	3.54648	[R].LNSFVQVEAPEQK.[G]	1xPhospho [S3]; 1xTMTpro [K13]; 1xTMTpro [N-Term]	Q61315 [2724-2736]	Q61315 1xPhospho [S2726]	1	_____LNsFVQVEAP	Apc
Q61315	QAsLSk.Q61315	5	QAsLSk	0.00205691	6.96522	6.51426	6.76115	6.82772	7.08463	6.85223	6.98051	5.89636	7.16859	7.15501	6.63357	6.46349	6.6087	6.75389	6.74704	5.98057	6.14626	6.09521	5.83654	5.67996	[K].QASLSK.[N]	1xPhospho [S3]; 1xTMTpro [K6]; 1xTMTpro [N-Term]	Q61315 [2381-2386]	Q61315 1xPhospho [S2383]	1	_____QAsLSK____	Apc
Q61315	QLsQQNLTk.Q61315	5	QLsQQNLTk	0.000418472	6.19045	5.8589	6.11446	6.26777	6.35073	5.5291	5.42973	4.16	5.62198	5.74842	5.17579	5.53136	4.96838	4.91772	5.04552	4.30828	4.80443	4.91408	4.76881	4.66503	[R].QLSQQNLTK.[Q]	1xPhospho [S3]; 1xTMTpro [K9]; 1xTMTpro [N-Term]	Q61315 [2372-2380]	Q61315 1xPhospho [S2374]	1	_____QLsQQNLTK_	Apc
Q61315	AVEFSSGAksPSk.Q61315	2	AVEFSSGAksPSk	0.0954594	7.61225	7.06793	7.72652	8.00215	7.9614	7.71526	8.57896	8.81086	7.68123	7.63544	7.90935	6.92315	7.54559	7.48904	7.68775	7.28705	7.28749	7.0546	7.72935	7.58757	[K].AVEFSSGAKSPSK.[S]	1xPhospho [S10]; 2xTMTpro [K9; K13]; 1xTMTpro [N-Term]	Q61315 [1350-1362]	Q61315 1xPhospho [S1359]	1	EFSSGAKsPSK____	Apc
Q61315	YkDANImsPGSSLPSLHVR.Q61315	2	YkDANImsPGSSLPSLHVR	0.00349832	6.6698	6.57111	6.90929	6.69728	6.91217	6.67814	6.86907	6.7904	6.96053	6.93961	6.74678	6.37479	6.80579	6.83436	6.72991	6.27654	6.39708	6.34117	6.55729	6.51711	[K].YKDANIMSPGSSLPSLHVR.[K]	1xPhospho [S8]; 1xOxidation [M7]; 1xTMTpro [K2]; 1xTMTpro [N-Term]	Q61315 [735-753]	Q61315 1xPhospho [S742]	1	YKDANIMsPGSSLPS	Apc
Q61315	SEsASk.Q61315	7	SEsASk	0.003778	8.3007	7.49666	8.01902	8.07222	7.45007	8.22254	9.13496	8.99004	8.93448	8.62746	8.25702	7.2752	8.75021	8.70995	8.77456	7.83592	7.58657	7.32843	7.72692	7.33061	[R].SESASK.[G]	1xPhospho [S3]; 1xTMTpro [K6]; 1xTMTpro [N-Term]	Q61315 [2394-2399]	Q61315 1xPhospho [S2396]	1	_____SEsASK____	Apc
Q61315	SktPPPPPQTVQAk.Q61315	2	SktPPPPPQTVQAk	2.92e-05	7.10584	6.94949	7.17384	7.346	7.30428	7.33139	7.31183	7.4036	7.49379	7.573	7.40967	7.38788	7.2149	7.27064	7.18357	6.58696	6.74857	6.71414	6.96514	6.86411	[R].SKTPPPPPQTVQAK.[R]	1xPhospho [T3]; 2xTMTpro [K2; K14]; 1xTMTpro [N-Term]	Q61315 [1435-1448]	Q61315 1xPhospho [T1437]	1	_____SKtPPPPPQT	Apc
Q61315	NDsLSSLDFDDDDVDLSR.Q61315	5	NDsLSSLDFDDDDVDLSR	0.0706494	4.59727	5.23334	5.06217	5.01087	5.07006	4.7139	5.06846	5.00364	5.59978	5.50675	4.65867	4.3214	4.84655	5.04308	5.35638	4.2643	4.91073	4.60558	4.50573	4.63773	[R].NDSLSSLDFDDDDVDLSR.[E]	1xPhospho [S3]; 1xTMTpro [N-Term]	Q61315 [1857-1874]	Q61315 1xPhospho [S1859]	1	_____NDsLSSLDFD	Apc
Q61315	HSsPSGTVAAR.Q61315	8	HSsPSGTVAAR	0.0144434	6.05797	6.25359	6.53733	6.42488	6.39699	6.44971	6.19158	6.47942	6.54491	6.81117	6.35591	6.17796	6.22178	7.94727	6.26267	5.63262	5.56543	5.94987	5.38066	5.59452	[K].HSSPSGTVAAR.[V]	1xPhospho [S3]; 1xTMTpro [N-Term]	Q61315 [2772-2782]	Q61315 1xPhospho [S2774]	1	_____HSsPSGTVAA	Apc
Q61315	TPASksPSEGPGATTSPR.Q61315	7	TPASksPSEGPGATTSPR	0.0276027	5.44439	4.86846	4.99831	4.96843	4.47087	4.99692	6.36705	7.08123	6.54078	5.94848	5.50633	4.30674	6.14767	6.21906	5.99285	4.9554	5.15845	5.14488	5.37654	5.01356	[K].TPASKSPSEGPGATTSPR.[G]	1xPhospho [S6]; 1xTMTpro [K5]; 1xTMTpro [N-Term]	Q61315 [2255-2272]	Q61315 1xPhospho [S2260]	1	__TPASKsPSEGPGA	Apc
Q61316	AFsDPFVEAEk.Q61316	NA	AFsDPFVEAEk	0.428052	2.92286	3.22958	3.36617	3.58321	3.07509	2.70335	2.89756	2.97044	3.47417	2.92742	2.38	2.88086	3.56012	3.27537	3.40332	3.65505	3.06755	3.70374	3.04189	3.30728	[R].AFSDPFVEAEK.[S]	1xPhospho [S3]; 1xTMTpro [K11]; 1xTMTpro [N-Term]	Q61316 [74-84]	Q61316 1xPhospho [S76]	1	_____AFsDPFVEAE	Hspa4
Q61361	ELETPsEEkSGR.Q61361	3	ELETPsEEkSGR	7.41e-05	5.83409	5.65135	6.22957	6.31226	6.24683	5.97414	5.87712	6.01818	6.10476	6.15163	6.42761	6.30379	6.81056	6.55313	7.11496	7.11889	6.71115	6.94419	7.10834	7.33475	[R].ELETPSEEKSGR.[T]	1xPhospho [S6]; 1xTMTpro [K9]; 1xTMTpro [N-Term]	Q61361 [582-593]	Q61361 1xPhospho [S587]	1	__ELETPsEEKSGR_	Bcan
Q61644	TEQSVtPEQQk.Q61644	3	TEQSVtPEQQk	0.000517814	6.48591	6.4889	6.35549	5.4947	5.8271	6.26396	5.97058	6.34029	6.67697	6.857	6.80804	6.89136	7.47668	7.50743	8.01945	7.31613	7.20991	7.36284	8.3085	8.22758	[K].TEQSVTPEQQK.[K]	1xPhospho [T6]; 1xTMTpro [K11]; 1xTMTpro [N-Term]	Q61644 [176-186]	Q61644 1xPhospho [T181]	1	__TEQSVtPEQQK__	Pacsin1
Q61644	TEQSVtPEQQkk.Q61644	3	TEQSVtPEQQkk	1.06e-07	6.5189	6.57856	6.80659	6.98426	7.1597	7.43405	7.654	8.16584	7.62654	7.99045	8.54928	8.12991	8.62225	8.80469	9.05801	9.31102	9.15732	8.84719	9.37483	9.46223	[K].TEQSVTPEQQKK.[L]	1xPhospho [T6]; 2xTMTpro [K11; K12]; 1xTMTpro [N-Term]	Q61644 [176-187]	Q61644 1xPhospho [T181]	1	__TEQSVtPEQQKK_	Pacsin1
Q61644	GRLDsGQLGLYPANYVEAI.Q61644	6	GRLDsGQLGLYPANYVEAI	0.00378255	2.84847	2.67971	2.42027	3.20745	3.85648	2.87806	2.30056	2.4695	3.06945	2.69742	3.0405	3.8002	3.03522	3.58293	4.25143	3.74691	3.91449	3.48839	4.18732	4.40209	[R].GRLDSGQLGLYPANYVEAI.[-]	1xPhospho [S5]; 1xTMTpro [N-Term]	Q61644 [423-441]	Q61644 1xPhospho [S427]	1	___GRLDsGQLGLYP	Pacsin1
Q61699	IEsPkLER.Q61699	8	IEsPkLER	0.00145918	9.47635	9.76983	9.98301	9.4744	9.42318	10.2016	10.0894	9.84698	10.0486	10.4385	10.3225	9.96216	10.3257	10.4371	10.5882	9.89262	9.68978	9.89251	10.0345	10.0538	[K].IESPKLER.[T]	1xPhospho [S3]; 1xTMTpro [K5]; 1xTMTpro [N-Term]	Q61699 [808-815]	Q61699 1xPhospho [S810]	1	_____IEsPKLER__	Hsph1
Q61771	DYEGPAIsPk.Q61771	1	DYEGPAIsPk	1.26e-06	6.28568	6.09657	6.44297	6.39805	6.31484	5.69055	5.9306	5.39537	5.70732	5.93783	4.86021	4.86649	5.06014	5.16301	5.36374	5.39726	5.2788	5.01871	5.47474	5.35276	[R].DYEGPAISPK.[V]	1xPhospho [S8]; 1xTMTpro [K10]; 1xTMTpro [N-Term]	Q61771 [674-683]	Q61771 1xPhospho [S681]	1	DYEGPAIsPK_____	Kif3b
Q61879	TSDVNDTQPPQsE.Q61879	6	TSDVNDTQPPQsE	0.238576	3.73494	4.12981	4.30136	4.33879	4.20729	3.77153	3.18195	4.19266	3.92114	4.24458	4.29945	3.72114	4.32591	4.20588	4.42413	4.22071	4.54637	4.02505	4.20954	4.25445	[K].TSDVNDTQPPQSE.[-]	1xPhospho [S12]; 1xTMTpro [N-Term]	Q61879 [1964-1976]	Q61879 1xPhospho [S1975]	1	NDTQPPQsE______	Myh10
Q61937	cGSGPVHISGQHLVAVEEDAEsEDEDEEDVk.Q61937	NA	cGSGPVHISGQHLVAVEEDAEsEDEDEEDVk	0.339747	6.36166	6.0626	6.55184	6.52952	6.30702	6.06472	6.79162	7.36926	6.43581	6.32762	6.33796	6.16425	6.88219	6.63826	6.97486	6.90349	6.78978	6.33077	6.98665	6.98387	[K].CGSGPVHISGQHLVAVEEDAESEDEDEEDVK.[L]	1xCarbamidomethyl [C1]; 1xPhospho [S22]; 1xTMTpro [K31]; 1xTMTpro [N-Term]	Q61937 [104-134]	Q61937 1xPhospho [S125]	1	AVEEDAEsEDEDEED	Npm1
Q62048	YkDIIRQPsEEEIIk.Q62048	8	YkDIIRQPsEEEIIk	0.00852729	6.31578	6.36536	6.57002	6.39616	6.85654	6.15077	6.07741	6.11209	6.37658	6.52451	6.4147	6.67149	6.72062	6.72072	6.52107	6.3181	6.21214	6.12132	5.94193	6.31992	[K].YKDIIRQPSEEEIIK.[L]	1xPhospho [S9]; 2xTMTpro [K2; K15]; 1xTMTpro [N-Term]	Q62048 [108-122]	Q62048 1xPhospho [S116]	1	KDIIRQPsEEEIIK_	Pea15
Q62077	EGsFEAR.Q62077	7	EGsFEAR	0.00753709	7.38781	7.39258	7.40207	7.37547	7.15796	7.7375	7.9147	7.72311	8.30137	7.83412	7.20638	7.17524	8.0538	7.77595	7.61715	7.09264	7.24364	7.15747	7.60944	7.21213	[R].EGSFEAR.[Y]	1xPhospho [S3]; 1xTMTpro [N-Term]	Q62077 [1246-1252]	Q62077 1xPhospho [S1248]	1	_____EGsFEAR___	Plcg1
Q62108	RYsPVAk.Q62108	7	RYsPVAk	0.00914905	8.46581	8.15118	8.66514	8.13458	7.75748	9.16047	9.74473	9.71893	9.40413	9.28206	9.14303	8.00231	9.8582	9.61364	9.13297	9.55654	8.85748	8.56597	9.66169	9.51157	[R].RYSPVAK.[D]	1xPhospho [S3]; 1xTMTpro [K7]; 1xTMTpro [N-Term]	Q62108 [293-299]	Q62108 1xPhospho [S295]	1	_____RYsPVAK___	Dlg4
Q62108	RYsPVAkDLLGEEDIPREPR.Q62108	NA	RYsPVAkDLLGEEDIPREPR	0.543343	6.58814	6.68362	7.23921	7.13355	7.52359	7.09016	6.16283	5.49613	6.66193	7.494	7.11285	6.95057	6.79248	6.70492	6.43392	6.79496	6.5762	6.92156	6.51547	6.99995	[R].RYSPVAKDLLGEEDIPREPR.[R]	1xPhospho [S3]; 1xTMTpro [K7]; 1xTMTpro [N-Term]	Q62108 [293-312]	Q62108 1xPhospho [S295]	1	_____RYsPVAKDLL	Dlg4
Q62108	EQLmNSsLGSGTASLR.Q62108	6	EQLmNSsLGSGTASLR	0.00828148	5.84477	5.72922	6.0358	6.06916	6.12151	5.44753	5.55739	5.56225	5.73185	5.5939	5.42891	5.70355	5.77366	5.592	5.65454	5.42196	5.41527	5.49972	5.67715	5.93311	[R].EQLMNSSLGSGTASLR.[S]	1xPhospho [S7]; 1xOxidation [M4]; 1xTMTpro [N-Term]	Q62108 [409-424]	Q62108 1xPhospho [S415]	1	_EQLMNSsLGSGTAS	Dlg4
Q62188	GsPTRPNPPVR.Q62188	2	GsPTRPNPPVR	0.000497306	8.6303	8.1539	8.31975	8.07021	8.0205	7.94728	8.63765	8.84814	8.90102	8.46983	7.6412	7.33442	8.19026	8.37915	8.44746	7.29785	7.15082	7.30781	7.49018	7.12513	[R].GSPTRPNPPVR.[N]	1xPhospho [S2]; 1xTMTpro [N-Term]	Q62188 [521-531]	Q62188 1xPhospho [S522]	1	______GsPTRPNPP	Dpysl3
Q62188	GGtPAGSTR.Q62188	5	GGtPAGSTR	6.2e-06	8.1985	7.83253	8.26942	8.39654	7.65627	7.30994	7.35453	7.99238	7.95784	7.14042	7.23661	7.02077	7.55819	7.6204	7.25286	6.55721	6.49854	6.06492	5.93566	6.09218	[K].GGTPAGSTR.[G]	1xPhospho [T3]; 1xTMTpro [N-Term]	Q62188 [512-520]	Q62188 1xPhospho [T514]	1	_____GGtPAGSTR_	Dpysl3
Q62188	SNITSLs.Q62188	5	SNITSLs	1.74e-06	6.67911	6.66939	6.68599	6.41582	6.87356	6.63112	6.48987	6.03835	6.64001	6.86543	6.0792	5.91115	6.08225	5.90156	5.59354	5.19922	5.19287	5.3666	5.48145	5.54615	[R].SNITSLS.[-]	1xPhospho [S7]; 1xTMTpro [N-Term]	Q62188 [564-570]	Q62188 1xPhospho [S570]	1	_SNITSLs_______	Dpysl3
Q62261	RFsLFGk.Q62261	8	RFsLFGk	0.0135214	6.33308	6.25267	6.44792	6.11273	6.42757	6.91543	6.9609	6.60396	7.7597	7.64165	6.54608	7.29236	7.68363	7.13857	7.16727	7.31183	7.14106	6.55402	6.66337	6.40009	[K].RFSLFGK.[K]	1xPhospho [S3]; 1xTMTpro [K7]; 1xTMTpro [N-Term]	Q62261 [2355-2361]	Q62261 1xPhospho [S2357]	1	_____RFsLFGK___	Sptbn1
Q62261	GDQVSQNGLPAEQGsPR.Q62261	NA	GDQVSQNGLPAEQGsPR	0.674923	6.41851	6.55996	6.87377	6.84573	6.34423	6.4042	6.4443	6.58005	7.01511	6.7848	6.38388	6.51793	7.08989	6.712	6.95393	6.57552	6.63798	6.53768	6.52103	6.46302	[K].GDQVSQNGLPAEQGSPR.[M]	1xPhospho [S15]; 1xTMTpro [N-Term]	Q62261 [2123-2139]	Q62261 1xPhospho [S2137]	1	GLPAEQGsPR_____	Sptbn1
Q62261	RRPPsPDPNTk.Q62261	4	RRPPsPDPNTk	0.0197595	4.89744	4.73668	4.5722	5.07398	4.24557	4.70721	5.32861	5.96658	5.46949	5.12757	5.06777	4.94846	6.03576	5.9344	6.09636	5.74107	5.65537	5.01081	6.11152	5.867	[K].RRPPSPDPNTK.[V]	1xPhospho [S5]; 1xTMTpro [K11]; 1xTMTpro [N-Term]	Q62261 [2098-2108]	Q62261 1xPhospho [S2102]	1	___RRPPsPDPNTK_	Sptbn1
Q62261	RPPsPDPNTk.Q62261	4	RPPsPDPNTk	0.00093533	7.36831	7.28611	7.54942	7.59844	7.03567	7.63925	8.20442	8.70962	8.10789	7.83219	7.9511	8.04378	8.83201	8.67461	8.8548	8.52397	8.48788	8.03701	8.93327	8.79602	[R].RPPSPDPNTK.[V]	1xPhospho [S4]; 1xTMTpro [K10]; 1xTMTpro [N-Term]	Q62261 [2099-2108]	Q62261 1xPhospho [S2102]	1	____RPPsPDPNTK_	Sptbn1
Q62261	RPPsPDPNTkVSEEAESQQWDTSk.Q62261	4	RPPsPDPNTkVSEEAESQQWDTSk	0.000704264	5.90947	5.62337	6.1518	4.83703	5.60659	6.39586	7.14375	7.72927	6.97058	6.69316	6.65006	6.34362	7.57864	7.42371	7.58186	7.27643	7.14915	6.68488	7.47195	7.32584	[R].RPPSPDPNTKVSEEAESQQWDTSK.[G]	1xPhospho [S4]; 2xTMTpro [K10; K24]; 1xTMTpro [N-Term]	Q62261 [2099-2122]	Q62261 1xPhospho [S2102]	1	____RPPsPDPNTKV	Sptbn1
Q62261	ESSPVPsPTLDRk.Q62261	3	ESSPVPsPTLDRk	0.000215554	5.40863	5.47542	5.29525	5.31898	5.39752	5.41047	5.41141	5.66075	5.59808	5.73776	5.65162	6.16103	6.89835	6.08186	6.63959	6.24784	6.09669	6.17069	6.25666	6.41734	[K].ESSPVPSPTLDRK.[A]	1xPhospho [S7]; 1xTMTpro [K13]; 1xTMTpro [N-Term]	Q62261 [2162-2174]	Q62261 1xPhospho [S2168]	1	_ESSPVPsPTLDRK_	Sptbn1
Q62261	AQTLPTSVVTITSESsPGkR.Q62261	4	AQTLPTSVVTITSESsPGkR	0.151315	8.09954	7.74467	7.93173	8.05605	7.8186	8.12098	8.25593	8.50452	8.05468	8.15724	8.34569	7.75848	8.93422	8.60687	8.11286	8.29077	8.23224	7.91423	8.67806	8.7205	[R].AQTLPTSVVTITSESSPGKR.[E]	1xPhospho [S16]; 1xTMTpro [K19]; 1xTMTpro [N-Term]	Q62261 [2325-2344]	Q62261 1xPhospho [S2340]	1	VTITSESsPGKR___	Sptbn1
Q62261	EkLtGLHk.Q62261	3	EkLtGLHk	5.32e-05	4.60494	4.11293	4.41639	4.29776	4.46234	4.56237	4.12296	4.54434	5.21141	5.11764	4.66479	5.93217	5.81678	6.01972	6.36841	6.26086	6.09125	6.07248	6.51764	5.88448	[K].EKLTGLHK.[M]	1xPhospho [T4]; 2xTMTpro [K2; K8]; 1xTMTpro [N-Term]	Q62261 [1353-1360]	Q62261 1xPhospho [T1356]	1	____EKLtGLHK___	Sptbn1
Q62277	LHQVyFDAPScVk.Q62277	6	LHQVyFDAPScVk	0.000380514	5.13993	5.10302	4.28433	3.97876	4.82573	4.84241	4.99739	5.06225	4.29262	4.31959	4.58614	4.4364	5.1323	5.54406	5.38758	6.88499	6.10273	5.63402	7.8538	7.62016	[R].LHQVYFDAPSCVK.[G]	1xCarbamidomethyl [C11]; 1xPhospho [Y5]; 1xTMTpro [K13]; 1xTMTpro [N-Term]	Q62277 [77-89]	Q62277 1xPhospho [Y81]	1	___LHQVyFDAPSCV	Syp
Q62318	SRsGEGEVSGLLR.Q62318	1	SRsGEGEVSGLLR	0.0636551	7.59633	7.73725	8.31551	8.22809	8.14055	7.52265	7.49247	7.34198	7.43862	7.7189	7.63747	7.41909	8.00842	7.85957	8.2194	7.49341	7.35866	7.36151	7.85832	7.98937	[R].SRSGEGEVSGLLR.[K]	1xPhospho [S3]; 1xTMTpro [N-Term]	Q62318 [471-483]	Q62318 1xPhospho [S473]	1	_____SRsGEGEVSG	Trim28
Q62407	RLsLSLSQk.Q62407	3	RLsLSLSQk	0.000509749	5.91909	6.18129	5.78564	5.80083	5.4186	6.15043	5.80027	5.97486	6.50635	6.53303	6.1862	6.87392	7.06674	7.09995	7.22356	6.57214	6.67987	6.6443	6.91206	6.63398	[R].RLSLSLSQK.[L]	1xPhospho [S3]; 1xTMTpro [K9]; 1xTMTpro [N-Term]	Q62407 [2411-2419]	Q62407 1xPhospho [S2413]	1	_____RLsLSLSQK_	Speg
Q62407	SRsVQDLR.Q62407	3	SRsVQDLR	0.00134511	5.21915	5.43307	5.84722	5.62828	5.91034	5.56247	5.22022	5.24544	5.91496	6.02284	6.19324	6.49144	6.02522	6.45583	6.46853	6.02195	6.15058	6.23249	6.25801	6.05	[R].SRSVQDLR.[V]	1xPhospho [S3]; 1xTMTpro [N-Term]	Q62407 [2394-2401]	Q62407 1xPhospho [S2396]	1	_____SRsVQDLR__	Speg
Q62407	mPsIPEEPEHGDLER.Q62407	6	mPsIPEEPEHGDLER	0.00476249	5.23346	5.14514	5.35685	5.44359	5.48801	4.85668	4.69153	4.60327	4.89667	5.16886	4.80968	5.20941	4.77711	5.1474	5.00606	4.9646	4.81587	5.04911	5.06037	5.06212	[K].MPSIPEEPEHGDLER.[L]	1xPhospho [S3]; 1xOxidation [M1]; 1xTMTpro [N-Term]	Q62407 [1175-1189]	Q62407 1xPhospho [S1177]	1	_____MPsIPEEPEH	Speg
Q62407	SYPGsP.Q62407	6	SYPGsP	0.00591905	4.25008	4.22149	4.77355	4.6079	4.09533	3.5244	3.73191	4.04855	4.08806	3.96793	4.42041	4.15222	4.37365	4.31377	4.32647	4.44743	4.26879	4.17203	4.59426	4.48224	[R].SYPGSP.[-]	1xPhospho [S5]; 1xTMTpro [N-Term]	Q62407 [3257-3262]	Q62407 1xPhospho [S3261]	1	___SYPGsP______	Speg
Q62407	RsTSREELVR.Q62407	NA	RsTSREELVR	0.0885642	1.9745	2.99172	4.21422	3.45065	3.59718	2.3839	3.12009	3.35291	3.30224	2.88816	3.74616	3.89186	3.38562	4.18098	3.97373	3.60716	4.02521	3.78575	3.18077	3.9379	[R].RSTSREELVR.[S]	1xPhospho [S2]; 1xTMTpro [N-Term]	Q62407 [508-517]	Q62407 1xPhospho [S509]	1	______RsTSREELV	Speg
Q62407	SRsEERGPFR.Q62407	6	SRsEERGPFR	0.0151355	4.14394	4.10893	4.44813	5.37371	4.58907	4.42407	4.31394	4.37119	4.1522	4.27779	4.80793	4.84525	4.93885	5.17729	4.84487	4.73574	4.80005	4.93985	4.81532	4.9753	[R].SRSEERGPFR.[G]	1xPhospho [S3]; 1xTMTpro [N-Term]	Q62407 [2359-2368]	Q62407 1xPhospho [S2361]	1	_____SRsEERGPFR	Speg
Q62407	AAsLDER.Q62407	3	AAsLDER	8.56e-06	6.59425	6.71995	7.05648	6.96204	6.72765	7.29883	7.05738	7.18574	7.39585	7.76541	7.66123	7.75538	8.23232	8.08891	8.25609	7.74093	7.75822	7.83988	7.83901	8.07102	[K].AASLDER.[T]	1xPhospho [S3]; 1xTMTpro [N-Term]	Q62407 [479-485]	Q62407 1xPhospho [S481]	1	_____AAsLDER___	Speg
Q62407	SGsSEDSGGASGR.Q62407	3	SGsSEDSGGASGR	3.84e-07	2.63302	2.94909	3.78736	3.12475	3.24303	4.13836	3.78365	4.37931	4.37205	4.94375	5.04542	5.73987	5.71106	5.82216	5.84265	5.12873	5.3396	5.33887	5.30687	5.25882	[R].SGSSEDSGGASGR.[S]	1xPhospho [S3]; 1xTMTpro [N-Term]	Q62407 [2474-2486]	Q62407 1xPhospho [S2476]	1	_____SGsSEDSGGA	Speg
Q62407	RGSsAESALPR.Q62407	3	RGSsAESALPR	2.01e-05	5.6035	5.48178	5.99235	5.95808	6.08402	5.76287	5.59488	5.75146	5.91759	5.95104	6.20199	6.76367	6.77167	6.6526	6.81151	6.34628	6.52564	6.70354	6.67625	6.69564	[R].RGSSAESALPR.[V]	1xPhospho [S4]; 1xTMTpro [N-Term]	Q62407 [2017-2027]	Q62407 1xPhospho [S2020]	1	____RGSsAESALPR	Speg
Q62407	ARsLEQPk.Q62407	3	ARsLEQPk	1.62e-05	6.43332	6.26151	6.31545	6.39485	6.46421	6.96985	7.05312	7.34898	7.28231	7.37864	7.25395	7.18952	8.21269	7.99115	7.97468	7.47378	7.66485	7.42471	7.86029	7.87889	[K].ARSLEQPK.[S]	1xPhospho [S3]; 1xTMTpro [K8]; 1xTMTpro [N-Term]	Q62407 [437-444]	Q62407 1xPhospho [S439]	1	_____ARsLEQPK__	Speg
Q62407	ATsEGESLRR.Q62407	3	ATsEGESLRR	2.19e-05	5.19774	5.64104	5.90636	6.05218	6.07237	5.86007	5.53707	5.84268	6.02311	6.11605	6.52314	7.05961	6.73988	6.78594	6.94315	6.59882	6.55403	6.66756	6.61265	6.76686	[R].ATSEGESLRR.[L]	1xPhospho [S3]; 1xTMTpro [N-Term]	Q62407 [2497-2506]	Q62407 1xPhospho [S2499]	1	_____ATsEGESLRR	Speg
Q62415	RSsITEPEGPGGPNIQk.Q62415	NA	RSsITEPEGPGGPNIQk	0.129815	6.14008	6.38465	6.52297	6.49473	6.33522	6.44148	6.5129	6.27662	6.87964	6.75583	6.38874	6.76367	7.0694	6.67849	6.61497	6.41173	6.49033	6.59702	6.6486	6.51446	[K].RSSITEPEGPGGPNIQK.[L]	1xPhospho [S3]; 1xTMTpro [K17]; 1xTMTpro [N-Term]	Q62415 [706-722]	Q62415 1xPhospho [S708]	1	_____RSsITEPEGP	Ppp1r13b
Q62417	VGGsIENLLmR.Q62417	5	VGGsIENLLmR	0.00339411	6.11478	5.84387	6.07288	6.25958	6.13018	5.99055	5.9095	5.8203	6.12483	6.00428	5.73191	5.14013	5.86604	5.80625	5.28203	5.43485	5.53551	5.76476	5.64343	5.71175	[R].VGGSIENLLMR.[S]	1xPhospho [S4]; 1xOxidation [M10]; 1xTMTpro [N-Term]	Q62417 [573-583]	Q62417 1xPhospho [S576]	1	____VGGsIENLLMR	Sorbs1
Q62417	SGLTSARsAESLLESTk.Q62417	5	SGLTSARsAESLLESTk	0.0342006	7.26981	7.33517	7.38271	7.51667	7.62555	7.37375	7.13239	6.82687	7.25619	7.69182	7.19001	7.06849	7.07695	7.23754	6.71543	6.69403	6.80965	6.80178	7.1406	7.25648	[R].SGLTSARSAESLLESTK.[L]	1xPhospho [S8]; 1xTMTpro [K17]; 1xTMTpro [N-Term]	Q62417 [715-731]	Q62417 1xPhospho [S722]	1	SGLTSARsAESLLES	Sorbs1
Q62417	sAESLLESTk.Q62417	2	sAESLLESTk	0.00946222	6.21532	5.91071	6.10016	6.08847	5.8907	6.06699	6.61436	6.87847	6.66093	6.25632	5.63907	5.17713	6.13327	6.06352	5.92329	5.87543	5.69237	5.39779	6.22108	5.67337	[R].SAESLLESTK.[L]	1xPhospho [S1]; 1xTMTpro [K10]; 1xTMTpro [N-Term]	Q62417 [722-731]	Q62417 1xPhospho [S722]	1	_______sAESLLES	Sorbs1
Q62417	SATVsPQQPQAQQR.Q62417	6	SATVsPQQPQAQQR	0.00240223	4.4104	4.86432	4.89361	4.5218	4.71184	3.98636	3.8075	3.83553	4.07928	4.1248	3.57111	4.17594	4.3329	4.1169	4.15202	4.68201	4.26421	3.93377	4.57207	4.49554	[R].SATVSPQQPQAQQR.[R]	1xPhospho [S5]; 1xTMTpro [N-Term]	Q62417 [1205-1218]	Q62417 1xPhospho [S1209]	1	___SATVsPQQPQAQ	Sorbs1
Q62417	LSksPTPVLSR.Q62417	5	LSksPTPVLSR	4.25e-06	8.27071	8.13414	8.25161	8.2116	7.87705	8.02266	8.00596	7.8734	8.16935	8.32327	7.59666	7.47224	7.80493	7.74655	7.52905	7.0641	7.2683	7.04667	7.42636	7.41184	[R].LSKSPTPVLSR.[S]	1xPhospho [S4]; 1xTMTpro [K3]; 1xTMTpro [N-Term]	Q62417 [704-714]	Q62417 1xPhospho [S707]	1	____LSKsPTPVLSR	Sorbs1
Q62418	LRsPFLQk.Q62418	5	LRsPFLQk	2.05e-05	6.77466	6.51501	6.78499	6.68037	6.65613	6.2555	6.27275	6.45015	6.3479	6.38394	6.27823	5.25738	6.271	5.74813	5.08284	5.34905	4.68899	5.03954	5.25002	5.22977	[K].LRSPFLQK.[Q]	1xPhospho [S3]; 1xTMTpro [K8]; 1xTMTpro [N-Term]	Q62418 [289-296]	Q62418 1xPhospho [S291]	1	_____LRsPFLQK__	Dbnl
Q62419	ITASSsFR.Q62419	1	ITASSsFR	0.000336349	7.76667	7.59557	7.96583	7.83273	7.82992	7.25166	7.27585	6.77535	7.47036	7.41867	6.84029	6.86491	7.43805	6.74556	7.36321	7.07255	6.8826	6.99546	6.92013	6.90991	[K].ITASSSFR.[S]	1xPhospho [S6]; 1xTMTpro [N-Term]	Q62419 [283-290]	Q62419 1xPhospho [S288]	1	__ITASSsFR_____	Sh3gl1
Q62448	TQtPPLGQTPQLGLk.Q62448	1	TQtPPLGQTPQLGLk	2e-05	5.47873	5.33191	5.87603	5.86519	5.5329	4.74853	4.78465	4.97541	5.59409	5.21655	4.52061	4.36098	4.55486	4.67131	4.37772	4.24181	4.71635	4.6206	4.35218	4.16899	[R].TQTPPLGQTPQLGLK.[T]	1xPhospho [T3]; 1xTMTpro [K15]; 1xTMTpro [N-Term]	Q62448 [505-519]	Q62448 1xPhospho [T507]	1	_____TQtPPLGQTP	Eif4g2
Q62523	sPGGPGPLTLk.Q62523	NA	sPGGPGPLTLk	0.348931	5.08894	5.27461	5.35306	4.75161	4.35757	4.67828	4.91738	5.88566	5.64949	4.88861	4.40752	4.5909	5.16873	5.39738	5.36884	4.44575	4.76781	4.42143	4.92933	4.85436	[R].SPGGPGPLTLK.[E]	1xPhospho [S1]; 1xTMTpro [K11]; 1xTMTpro [N-Term]	Q62523 [336-346]	Q62523 1xPhospho [S336]	1	_______sPGGPGPL	Zyx
Q63844	IADPEHDHTGFLTEyVATR.Q63844	6	IADPEHDHTGFLTEyVATR	0.0117667	4.95946	4.63635	5.17675	5.12053	4.91132	4.37253	4.47885	4.27706	4.52403	4.6919	3.99024	4.72205	4.74282	4.41884	4.76152	5.09126	4.76824	4.94291	4.70903	4.78799	[R].IADPEHDHTGFLTEYVATR.[W]	1xPhospho [Y15]; 1xTMTpro [N-Term]	Q63844 [191-209]	Q63844 1xPhospho [Y205]	1	HTGFLTEyVATR___	Mapk3
Q64012	GRLsPVPVPR.Q64012	1	GRLsPVPVPR	8.12e-06	7.91882	7.99171	8.54484	8.80471	8.28093	7.30566	7.2259	7.11574	7.49313	7.32513	7.34736	7.31436	7.31045	7.18537	7.24724	7.40969	7.35247	7.45629	7.43826	7.23661	[R].GRLSPVPVPR.[A]	1xPhospho [S4]; 1xTMTpro [N-Term]	Q64012 [132-141]	Q64012 1xPhospho [S135]	1	____GRLsPVPVPR_	Raly
Q64096	SSsAQcLSSSGk.Q64096	5	SSsAQcLSSSGk	0.0790334	4.96617	5.42527	5.55297	5.28724	5.72141	5.19279	4.99341	4.76519	5.15247	5.35353	5.27627	4.8441	4.95251	5.16008	4.92842	4.97097	4.89349	4.8549	5.16086	5.27642	[K].SSSAQCLSSSGK.[I]	1xCarbamidomethyl [C6]; 1xPhospho [S3]; 1xTMTpro [K12]; 1xTMTpro [N-Term]	Q64096 [1118-1129]	Q64096 1xPhospho [S1120]	1	_____SSsAQCLSSS	Mcf2l
Q641K1	VTsPTTYVLDEDEPR.Q641K1	5	VTsPTTYVLDEDEPR	0.000138169	6.61796	6.53003	6.93565	6.65396	6.51594	6.54358	6.96716	6.90219	6.85402	6.68886	6.15223	5.84869	6.21757	6.38417	6.40113	5.9976	5.96531	5.9578	6.3641	6.16441	[K].VTSPTTYVLDEDEPR.[F]	1xPhospho [S3]; 1xTMTpro [N-Term]	Q641K1 [1158-1172]	Q641K1 1xPhospho [S1160]	1	_____VTsPTTYVLD	Agtpbp1
Q641P0	HNPVFGVms.Q641P0	NA	HNPVFGVms	0.365249	7.31044	7.40272	7.60676	7.32862	7.66631	7.49994	7.17701	7.26024	7.72601	7.70506	7.55294	7.59808	7.68659	7.59576	7.7381	7.39699	7.45864	7.63702	7.69147	7.85323	[R].HNPVFGVMS.[-]	1xPhospho [S9]; 1xOxidation [M8]; 1xTMTpro [N-Term]	Q641P0 [410-418]	Q641P0 1xPhospho [S418]	1	NPVFGVMs_______	Actr3b
Q64332	TPALsPQRPLTTQQPQSGTLk.Q64332	4	TPALsPQRPLTTQQPQSGTLk	0.000509749	6.81938	6.78031	7.04332	6.85351	6.89926	6.99804	7.41648	7.84573	7.4618	7.26018	7.13719	7.19952	7.63567	7.7497	7.77444	8.08001	7.75438	7.48173	8.0236	8.04025	[R].TPALSPQRPLTTQQPQSGTLK.[E]	1xPhospho [S5]; 1xTMTpro [K21]; 1xTMTpro [N-Term]	Q64332 [422-442]	Q64332 1xPhospho [S426]	1	___TPALsPQRPLTT	Syn2
Q68EF6	kDsLTk.Q68EF6	7	kDsLTk	0.000156991	7.30967	6.79301	7.20172	6.8389	6.81113	8.12039	8.5705	8.35274	8.14999	8.17298	8.37725	7.18721	8.4896	8.49933	8.57393	7.65702	7.324	7.00737	7.4799	7.44085	[R].KDSLTK.[A]	1xPhospho [S3]; 2xTMTpro [K1; K6]; 1xTMTpro [N-Term]	Q68EF6 [586-591]	Q68EF6 1xPhospho [S588]	1	_____KDsLTK____	Begain
Q68EF6	AQLyGTLLN.Q68EF6	NA	AQLyGTLLN	0.77707	4.09611	3.35328	4.00235	3.80369	3.99051	4.24115	3.76941	3.93093	3.89285	3.69333	3.61633	4.16853	4.51963	3.98653	4.10212	4.17259	4.06571	3.00529	4.17349	4.14964	[K].AQLYGTLLN.[-]	1xPhospho [Y4]; 1xTMTpro [N-Term]	Q68EF6 [592-600]	Q68EF6 1xPhospho [Y595]	1	____AQLyGTLLN__	Begain
Q68EF6	YYGGGGGGGAAGGGsPGDkAEGR.Q68EF6	2	YYGGGGGGGAAGGGsPGDkAEGR	0.000719361	4.8485	5.12134	5.72233	5.09662	5.49685	5.66202	5.78704	6.0608	6.02779	6.31232	5.80216	5.91558	5.93901	6.22	5.68628	5.13935	5.16904	5.15273	5.62771	5.01855	[R].YYGGGGGGGAAGGGSPGDKAEGR.[A]	1xPhospho [S15]; 1xTMTpro [K19]; 1xTMTpro [N-Term]	Q68EF6 [449-471]	Q68EF6 1xPhospho [S463]	1	GGAAGGGsPGDKAEG	Begain
Q68EF6	RPsVDTPVTDVGFLR.Q68EF6	7	RPsVDTPVTDVGFLR	0.000257463	6.03616	5.83939	5.92375	5.56234	5.61393	6.43114	6.93878	7.07122	7.05833	6.78634	6.29984	5.88628	6.90852	6.86201	6.82786	5.93074	5.87794	5.56234	6.13407	6.00674	[R].RPSVDTPVTDVGFLR.[A]	1xPhospho [S3]; 1xTMTpro [N-Term]	Q68EF6 [244-258]	Q68EF6 1xPhospho [S246]	1	_____RPsVDTPVTD	Begain
Q68EF6	AGGDLSLsPSR.Q68EF6	2	AGGDLSLsPSR	0.00712312	7.77388	7.84354	7.8849	7.95283	7.7491	7.98369	8.16022	8.46528	8.18751	8.09941	8.0591	7.37042	8.19893	8.22186	7.67741	7.51172	7.35925	7.33091	7.73947	7.71516	[R].AGGDLSLSPSR.[S]	1xPhospho [S8]; 1xTMTpro [N-Term]	Q68EF6 [503-513]	Q68EF6 1xPhospho [S510]	1	AGGDLSLsPSR____	Begain
Q68FD5	GILRtPDTIR.Q68FD5	3	GILRtPDTIR	1.71e-06	6.19367	6.35032	6.80446	6.5847	6.44694	6.70846	6.57533	6.85673	6.70423	6.87135	7.1601	7.41858	7.89134	7.38288	7.74532	7.67124	7.55588	7.68783	7.73881	7.51229	[K].GILRTPDTIR.[R]	1xPhospho [T5]; 1xTMTpro [N-Term]	Q68FD5 [390-399]	Q68FD5 1xPhospho [T394]	1	___GILRtPDTIR__	Cltc
Q68FD5	GILRtPDTIRR.Q68FD5	3	GILRtPDTIRR	4.67e-05	6.69946	6.63145	7.16584	7.04736	7.09689	6.94514	6.74506	6.70158	7.0511	7.16413	7.34201	7.541	7.68636	7.50108	7.57337	7.51539	7.42193	7.56295	7.65574	7.66268	[K].GILRTPDTIRR.[F]	1xPhospho [T5]; 1xTMTpro [N-Term]	Q68FD5 [390-400]	Q68FD5 1xPhospho [T394]	1	___GILRtPDTIRR_	Cltc
Q68FE6	FSTYSQsPPDTPSLR.Q68FE6	1	FSTYSQsPPDTPSLR	0.00167229	4.73338	4.73445	4.65649	4.87264	4.70244	4.12003	4.31155	4.39758	4.428	4.49757	4.52798	4.07445	4.29714	4.35504	4.39966	4.29742	4.46741	4.04909	4.45723	4.36471	[R].FSTYSQSPPDTPSLR.[E]	1xPhospho [S7]; 1xTMTpro [N-Term]	Q68FE6 [341-355]	Q68FE6 1xPhospho [S347]	1	_FSTYSQsPPDTPSL	Ripor1
Q68FF6	SQSELDDQHDYDSVAsDEDTDQEPLPSAGATR.Q68FF6	3	SQSELDDQHDYDSVAsDEDTDQEPLPSAGATR	2.18e-05	5.91868	5.92301	5.77809	6.04033	6.30392	6.07953	6.11874	6.13228	6.2839	6.61964	6.39778	6.94467	6.8154	6.69255	7.32996	7.08778	7.08159	7.13917	6.93773	7.24131	[R].SQSELDDQHDYDSVASDEDTDQEPLPSAGATR.[N]	1xPhospho [S16]; 1xTMTpro [N-Term]	Q68FF6 [382-413]	Q68FF6 1xPhospho [S397]	1	HDYDSVAsDEDTDQE	Git1
Q68FF6	HGsGADSDYENTQSGDPLLGLEGkR.Q68FF6	3	HGsGADSDYENTQSGDPLLGLEGkR	0.00419264	5.4059	5.25046	5.717	5.71393	5.90434	5.8591	5.66293	5.2664	6.08358	6.33168	5.99048	6.46835	6.1097	6.17654	6.06032	6.17443	6.34687	6.47745	6.24457	6.48252	[R].HGSGADSDYENTQSGDPLLGLEGKR.[F]	1xPhospho [S3]; 1xTMTpro [K24]; 1xTMTpro [N-Term]	Q68FF6 [599-623]	Q68FF6 1xPhospho [S601]	1	_____HGsGADSDYE	Git1
Q68FF6	HGsGADSDYENTQSGDPLLGLEGk.Q68FF6	4	HGsGADSDYENTQSGDPLLGLEGk	0.0205259	5.8866	5.96094	5.9908	5.97552	5.30436	6.12258	6.40244	6.48686	6.6676	6.35091	5.78244	6.26562	6.70955	6.63001	6.69628	6.23661	6.49612	6.06349	6.72626	6.54543	[R].HGSGADSDYENTQSGDPLLGLEGK.[R]	1xPhospho [S3]; 1xTMTpro [K24]; 1xTMTpro [N-Term]	Q68FF6 [599-622]	Q68FF6 1xPhospho [S601]	1	_____HGsGADSDYE	Git1
Q68FH0	AASPYSQRPAsPTAVRR.Q68FH0	8	AASPYSQRPAsPTAVRR	0.140833	6.55296	6.88962	7.02096	7.03914	7.2851	6.97404	6.35767	6.22722	6.75818	7.50405	7.35873	7.4186	7.23082	7.19899	7.04201	6.64621	6.77564	7.11142	6.59264	7.00375	[R].AASPYSQRPASPTAVRR.[V]	1xPhospho [S11]; 1xTMTpro [N-Term]	Q68FH0 [270-286]	Q68FH0 1xPhospho [S280]	1	PYSQRPAsPTAVRR_	Pkp4
Q68FH0	VAsPSQGQVGSSSPk.Q68FH0	2	VAsPSQGQVGSSSPk	0.00167586	6.29772	6.28111	6.205	6.25365	6.54985	6.42814	6.53491	6.72283	6.69981	6.83355	6.68785	6.48594	6.73992	6.92744	6.75738	6.23494	6.30863	6.28927	6.47382	6.50333	[R].VASPSQGQVGSSSPK.[R]	1xPhospho [S3]; 1xTMTpro [K15]; 1xTMTpro [N-Term]	Q68FH0 [324-338]	Q68FH0 1xPhospho [S326]	1	_____VAsPSQGQVG	Pkp4
Q68FH0	TGsVGIGNLQR.Q68FH0	5	TGsVGIGNLQR	0.00782499	7.56739	7.6255	7.53844	7.50632	8.00749	7.41008	7.50458	7.20865	7.82204	7.8577	7.24125	7.69574	7.56343	7.24062	7.3833	7.04605	7.1603	6.97089	7.30946	7.02113	[R].TGSVGIGNLQR.[T]	1xPhospho [S3]; 1xTMTpro [N-Term]	Q68FH0 [444-454]	Q68FH0 1xPhospho [S446]	1	_____TGsVGIGNLQ	Pkp4
Q68FH0	AASPYSQRPAsPTAVR.Q68FH0	7	AASPYSQRPAsPTAVR	0.000221908	6.81698	7.049	6.80664	6.82912	6.72418	7.30477	7.50719	7.68508	7.85834	7.67656	7.44533	7.25631	7.95731	7.98596	7.93056	7.29179	7.05925	7.31173	7.48534	7.4061	[R].AASPYSQRPASPTAVR.[R]	1xPhospho [S11]; 1xTMTpro [N-Term]	Q68FH0 [270-285]	Q68FH0 1xPhospho [S280]	1	PYSQRPAsPTAVR__	Pkp4
Q68FH0	AQSPSYVTSTGVSPSRGsLR.Q68FH0	5	AQSPSYVTSTGVSPSRGsLR	0.0147909	5.3255	5.16724	5.17004	5.45198	5.46689	5.25771	5.00287	4.54306	5.7293	5.47599	4.65006	5.53637	5.18379	4.66087	4.88017	4.63756	4.49619	4.72762	4.53273	4.54296	[R].AQSPSYVTSTGVSPSRGSLR.[T]	1xPhospho [S18]; 1xTMTpro [N-Term]	Q68FH0 [218-237]	Q68FH0 1xPhospho [S235]	1	GVSPSRGsLR_____	Pkp4
Q68FH0	GLYPGSSkPsPIYISSYSSPAR.Q68FH0	NA	GLYPGSSkPsPIYISSYSSPAR	0.379995	4.70023	4.14054	4.54922	4.59323	4.38435	4.29532	4.76773	4.49764	4.69078	4.84475	4.53774	4.05623	4.25743	4.72021	4.83636	4.34803	4.28538	4.33398	4.23904	4.51836	[K].GLYPGSSKPSPIYISSYSSPAR.[E]	1xPhospho [S10]; 1xTMTpro [K8]; 1xTMTpro [N-Term]	Q68FH0 [1081-1102]	Q68FH0 1xPhospho [S1090]	1	YPGSSKPsPIYISSY	Pkp4
Q68FH0	VGsPLTLTDAQTR.Q68FH0	8	VGsPLTLTDAQTR	0.00359775	7.97307	8.07187	8.0722	7.99536	8.06322	8.01785	7.87019	7.94508	8.20381	8.29558	8.20139	8.17157	8.3953	8.4321	8.23941	7.70933	7.79457	7.93934	8.04644	7.97676	[R].VGSPLTLTDAQTR.[V]	1xPhospho [S3]; 1xTMTpro [N-Term]	Q68FH0 [311-323]	Q68FH0 1xPhospho [S313]	1	_____VGsPLTLTDA	Pkp4
Q68FH0	LYLQsPR.Q68FH0	8	LYLQsPR	1.68e-05	7.11817	7.10905	7.24974	7.14419	7.42301	7.59961	7.56424	7.84332	7.84331	7.99674	8.12981	7.74431	7.94119	8.25833	8.15575	7.63284	7.53535	7.54088	7.54089	7.69774	[R].LYLQSPR.[S]	1xPhospho [S5]; 1xTMTpro [N-Term]	Q68FH0 [1129-1135]	Q68FH0 1xPhospho [S1133]	1	___LYLQsPR_____	Pkp4
Q68FH0	TYYsPVYR.Q68FH0	8	TYYsPVYR	0.00247195	7.34779	7.30474	7.49847	7.46339	7.45846	7.44369	7.40173	7.69897	7.81783	7.91452	7.82457	7.7356	7.88377	7.85554	7.9706	7.30188	7.47614	7.56251	7.57322	7.64997	[R].TYYSPVYR.[S]	1xPhospho [S4]; 1xTMTpro [N-Term]	Q68FH0 [418-425]	Q68FH0 1xPhospho [S421]	1	____TYYsPVYR___	Pkp4
Q68FH0	RVGsVTSR.Q68FH0	5	RVGsVTSR	0.0178419	6.28025	6.16028	6.23291	6.5068	6.56176	5.85453	5.70343	4.86622	6.21718	6.34643	5.58491	6.11894	5.6984	5.95009	5.94938	5.60134	5.42797	5.57606	5.79055	5.02775	[R].RVGSVTSR.[Q]	1xPhospho [S4]; 1xTMTpro [N-Term]	Q68FH0 [286-293]	Q68FH0 1xPhospho [S289]	1	____RVGsVTSR___	Pkp4
Q69Z98	smEVLSVTDGGSPVPAR.Q69Z98	NA	smEVLSVTDGGSPVPAR	0.641756	4.03684	4.55887	5.06834	4.67105	4.86315	4.6236	4.34997	4.12017	4.55345	4.66582	4.42921	3.83255	4.57477	4.50596	4.6253	4.42827	4.89416	4.52283	4.49681	4.28895	[K].SMEVLSVTDGGSPVPAR.[R]	1xPhospho [S1]; 1xOxidation [M2]; 1xTMTpro [N-Term]	Q69Z98 [383-399]	Q69Z98 1xPhospho [S383]	1	_______sMEVLSVT	Brsk2
Q69ZH9	HYsQDcSSIk.Q69ZH9	2	HYsQDcSSIk	9.22e-05	7.4053	7.34506	7.76119	7.48232	7.47435	7.5535	7.73636	7.49482	8.28431	8.03264	7.49527	7.27243	7.30936	7.45693	7.41666	6.92643	7.02014	6.83768	6.9994	6.73569	[R].HYSQDCSSIK.[A]	1xCarbamidomethyl [C6]; 1xPhospho [S3]; 1xTMTpro [K10]; 1xTMTpro [N-Term]	Q69ZH9 [592-601]	Q69ZH9 1xPhospho [S594]	1	_____HYsQDCSSIK	Arhgap23
Q69ZH9	ARsDDYLSR.Q69ZH9	2	ARsDDYLSR	0.00049814	8.53224	8.44821	8.28942	8.23455	8.45742	8.54779	8.26279	8.1731	8.76304	8.90152	8.31611	8.09176	8.24815	8.69921	8.25881	7.53211	7.61647	7.75576	7.83983	7.93803	[R].ARSDDYLSR.[A]	1xPhospho [S3]; 1xTMTpro [N-Term]	Q69ZH9 [349-357]	Q69ZH9 1xPhospho [S351]	1	_____ARsDDYLSR_	Arhgap23
Q69ZH9	ADSsPk.Q69ZH9	7	ADSsPk	0.0155934	7.25081	7.0587	7.35445	7.01326	6.60007	7.32382	8.15054	8.52208	8.59609	7.8682	6.75526	6.74154	7.61082	7.836	7.74465	7.68936	7.22041	6.9304	7.55708	7.33981	[K].ADSSPK.[G]	1xPhospho [S4]; 1xTMTpro [K6]; 1xTMTpro [N-Term]	Q69ZH9 [836-841]	Q69ZH9 1xPhospho [S839]	1	____ADSsPK_____	Arhgap23
Q69ZH9	SYsPSFQR.Q69ZH9	2	SYsPSFQR	2.88e-06	7.62162	7.62437	7.81402	7.79939	7.81446	7.88388	7.78351	8.15351	8.1834	8.06697	7.62562	6.8982	7.41523	7.71403	6.94423	6.31859	6.57029	6.66904	6.71942	6.72973	[R].SYSPSFQR.[R]	1xPhospho [S3]; 1xTMTpro [N-Term]	Q69ZH9 [419-426]	Q69ZH9 1xPhospho [S421]	1	_____SYsPSFQR__	Arhgap23
Q69ZH9	QmNLGFGDEsPEPEAR.Q69ZH9	5	QmNLGFGDEsPEPEAR	0.00228599	6.07274	5.9095	6.27837	6.02079	6.55887	6.00855	6.16675	6.09739	6.19844	6.22663	5.553	5.67971	5.88347	5.67733	5.70069	5.42455	5.55342	5.64764	5.92987	6.01275	[R].QMNLGFGDESPEPEAR.[G]	1xPhospho [S10]; 1xOxidation [M2]; 1xTMTpro [N-Term]	Q69ZH9 [506-521]	Q69ZH9 1xPhospho [S515]	1	NLGFGDEsPEPEAR_	Arhgap23
Q69ZH9	LPSRVPsLR.Q69ZH9	5	LPSRVPsLR	0.000475969	5.62937	6.14427	6.21107	5.92882	6.42857	6.39218	6.02852	5.86459	6.29761	6.65233	6.05852	5.99349	5.51038	5.77143	5.92003	5.32543	5.15044	5.22012	5.11947	5.59552	[R].LPSRVPSLR.[V]	1xPhospho [S7]; 1xTMTpro [N-Term]	Q69ZH9 [637-645]	Q69ZH9 1xPhospho [S643]	1	_LPSRVPsLR_____	Arhgap23
Q69ZH9	RLPsRVPsLR.Q69ZH9	5	RLPsRVPsLR	0.000263223	6.3295	6.41432	6.44149	6.51816	6.79947	6.57266	6.48446	6.05136	6.80043	6.85332	6.11279	6.21455	6.18311	6.06495	6.07222	6.02426	5.50756	5.87202	5.63293	5.82946	[R].RLPSRVPSLR.[V]	2xPhospho [S4; S8]; 1xTMTpro [N-Term]	Q69ZH9 [636-645]	Q69ZH9 2xPhospho [S639; S643]	2	____RLPsRVPsLR_	Arhgap23
Q69ZH9	RSsYLLAITTER.Q69ZH9	2	RSsYLLAITTER	4.64e-05	5.91685	6.01634	6.11052	5.86864	5.92161	6.48007	6.39677	6.03777	6.74975	6.87487	6.44045	6.3216	6.38467	6.62005	6.39257	5.60699	5.66017	5.85292	5.7903	5.61746	[R].RSSYLLAITTER.[S]	1xPhospho [S3]; 1xTMTpro [N-Term]	Q69ZH9 [605-616]	Q69ZH9 1xPhospho [S607]	1	_____RSsYLLAITT	Arhgap23
Q69ZH9	SkscDDGLNTFRDEGR.Q69ZH9	2	SkscDDGLNTFRDEGR	9.38e-06	8.48202	8.64291	8.68785	8.49532	8.82487	9.15661	9.12049	9.03835	9.35774	9.51212	9.17005	8.93147	8.70557	9.10985	8.86182	8.25079	8.40885	8.37519	8.44965	8.42061	[R].SKSCDDGLNTFRDEGR.[V]	1xCarbamidomethyl [C4]; 1xPhospho [S3]; 1xTMTpro [K2]; 1xTMTpro [N-Term]	Q69ZH9 [617-632]	Q69ZH9 1xPhospho [S619]	1	_____SKsCDDGLNT	Arhgap23
Q69ZR2	SSsDNNTNTLGR.Q69ZR2	NA	SSsDNNTNTLGR	0.912924	4.42088	4.60134	4.98212	4.02933	3.58084	4.02531	4.18465	4.21082	4.17327	4.38752	4.19566	4.03276	4.43294	4.48281	4.23346	3.89028	4.0461	4.07316	4.81933	4.08152	[R].SSSDNNTNTLGR.[N]	1xPhospho [S3]; 1xTMTpro [N-Term]	Q69ZR2 [1574-1585]	Q69ZR2 1xPhospho [S1576]	1	_____SSsDNNTNTL	Hectd1
Q69ZR2	RLDsSGER.Q69ZR2	6	RLDsSGER	0.000856814	7.77247	7.81326	7.92213	7.89175	7.9666	7.35815	7.10814	7.01709	7.44594	7.49631	7.15307	7.57127	7.62042	7.40914	7.66266	7.34806	7.48052	7.58385	7.56737	7.61322	[R].RLDSSGER.[S]	1xPhospho [S4]; 1xTMTpro [N-Term]	Q69ZR2 [354-361]	Q69ZR2 1xPhospho [S357]	1	____RLDsSGER___	Hectd1
Q69ZS0	mNsQDkLGLTVcYR.Q69ZS0	5	mNsQDkLGLTVcYR	0.00154842	6.26092	6.21543	6.7061	6.52462	6.59794	6.27063	6.35145	6.30603	6.79646	6.65401	6.13399	5.63989	6.00075	6.11587	5.99971	6.08559	5.64955	6.15473	5.83694	5.90209	[R].MNSQDKLGLTVCYR.[T]	1xCarbamidomethyl [C12]; 1xPhospho [S3]; 1xOxidation [M1]; 1xTMTpro [K6]; 1xTMTpro [N-Term]	Q69ZS0 [425-438]	Q69ZS0 1xPhospho [S427]	1	_____MNsQDKLGLT	Pdzrn3
Q69ZS0	STPLTLEIsPDNSLR.Q69ZS0	5	STPLTLEIsPDNSLR	0.0882414	4.0089	3.814	4.60052	4.00672	3.61806	3.46343	3.51004	3.4796	4.25475	4.36988	3.32749	3.51607	3.64227	3.79971	3.7934	3.5911	3.16498	3.38203	3.61333	3.48102	[R].STPLTLEISPDNSLR.[R]	1xPhospho [S9]; 1xTMTpro [N-Term]	Q69ZS0 [767-781]	Q69ZS0 1xPhospho [S775]	1	TPLTLEIsPDNSLR_	Pdzrn3
Q69ZS0	STPLTLEIsPDNSLRR.Q69ZS0	2	STPLTLEIsPDNSLRR	5.38e-06	6.61368	6.82398	6.74009	6.79332	7.10382	7.24898	7.07641	6.69548	7.19141	7.28681	6.58913	6.29374	6.29104	6.21332	6.31232	5.58489	5.7552	5.83942	6.32851	5.81376	[R].STPLTLEISPDNSLRR.[V]	1xPhospho [S9]; 1xTMTpro [N-Term]	Q69ZS0 [767-782]	Q69ZS0 1xPhospho [S775]	1	TPLTLEIsPDNSLRR	Pdzrn3
Q69ZS8	QVRVsPcHSR.Q69ZS8	6	QVRVsPcHSR	0.0938974	5.79482	5.66782	5.68482	5.96421	5.87829	5.57181	5.12861	5.16655	5.26923	5.69745	5.55459	5.25831	5.81347	5.82081	4.9349	5.54608	5.22932	5.4824	5.22908	5.67342	[R].QVRVSPCHSR.[Q]	1xCarbamidomethyl [C7]; 1xPhospho [S5]; 1xTMTpro [N-Term]	Q69ZS8 [310-319]	Q69ZS8 1xPhospho [S314]	1	___QVRVsPCHSR__	Kazn
Q69ZS8	VsPcHSR.Q69ZS8	NA	VsPcHSR	0.83361	4.7305	4.85392	5.3727	5.0693	4.77268	4.57076	4.94555	5.03488	4.94786	4.58081	4.55183	4.3709	5.29882	4.87492	4.88226	4.87712	4.45206	4.64139	5.14066	5.18963	[R].VSPCHSR.[Q]	1xCarbamidomethyl [C4]; 1xPhospho [S2]; 1xTMTpro [N-Term]	Q69ZS8 [313-319]	Q69ZS8 1xPhospho [S314]	1	______VsPCHSR__	Kazn
Q69ZW3	sIQEDTk.Q69ZW3	2	sIQEDTk	0.0652572	8.43472	7.99715	8.37452	8.11713	7.93855	7.87192	8.65551	8.58825	8.82118	8.33252	7.80699	7.71915	8.43682	8.36321	8.51423	8.10714	7.85331	7.5195	7.92305	7.85452	[R].SIQEDTK.[R]	1xPhospho [S1]; 1xTMTpro [K7]; 1xTMTpro [N-Term]	Q69ZW3 [1038-1044]	Q69ZW3 1xPhospho [S1038]	1	_______sIQEDTK_	Ehbp1
Q69ZW3	SRsLEcR.Q69ZW3	2	SRsLEcR	0.012876	5.36705	5.2964	5.40703	5.4559	4.97068	5.72208	6.12154	6.03283	6.10802	5.85072	5.62176	4.98107	5.88617	6.23099	5.32296	4.98855	5.12058	4.6845	5.66269	5.40674	[K].SRSLECR.[L]	1xCarbamidomethyl [C6]; 1xPhospho [S3]; 1xTMTpro [N-Term]	Q69ZW3 [745-751]	Q69ZW3 1xPhospho [S747]	1	_____SRsLECR___	Ehbp1
Q69ZW3	QRsIQEDTk.Q69ZW3	2	QRsIQEDTk	0.0015091	7.68779	7.50805	7.55807	7.81006	7.42311	7.37364	7.88752	7.58105	8.03244	7.93492	7.2486	6.91365	7.56217	7.52302	7.62404	7.15978	7.10972	6.69028	7.07607	6.94491	[R].QRSIQEDTK.[R]	1xPhospho [S3]; 1xTMTpro [K9]; 1xTMTpro [N-Term]	Q69ZW3 [1036-1044]	Q69ZW3 1xPhospho [S1038]	1	_____QRsIQEDTK_	Ehbp1
Q69ZX8	SktSEDISQASk.Q69ZX8	1	SktSEDISQASk	8.02e-05	7.49005	7.4264	7.47369	7.54103	7.92707	7.05099	6.69383	6.4124	7.34018	7.10449	6.86195	6.56832	6.80532	6.79864	6.46538	6.42508	6.40966	6.74152	6.57642	6.52293	[K].SKTSEDISQASK.[Y]	1xPhospho [T3]; 2xTMTpro [K2; K12]; 1xTMTpro [N-Term]	Q69ZX8 [458-469]	Q69ZX8 1xPhospho [T460]	1	_____SKtSEDISQA	Ablim3
Q69ZX8	SAsLPAYR.Q69ZX8	NA	SAsLPAYR	0.330857	5.50467	5.7598	6.26096	5.88404	6.02129	5.98177	5.93937	5.72433	6.37001	6.46762	5.83331	5.94926	6.39751	6.04189	6.14468	6.15374	6.23028	6.20168	6.06759	6.23608	[K].SASLPAYR.[R]	1xPhospho [S3]; 1xTMTpro [N-Term]	Q69ZX8 [582-589]	Q69ZX8 1xPhospho [S584]	1	_____SAsLPAYR__	Ablim3
Q69ZX8	TSETSIsPPGSSIGSPNR.Q69ZX8	NA	TSETSIsPPGSSIGSPNR	0.677251	7.26207	7.11854	6.65675	7.06966	6.93248	6.77271	6.69426	6.88334	6.90548	6.89268	6.5306	7.01979	6.96445	6.99378	7.51001	6.68497	6.72797	6.95483	7.2631	7.24143	[R].TSETSISPPGSSIGSPNR.[V]	1xPhospho [S7]; 1xTMTpro [N-Term]	Q69ZX8 [276-293]	Q69ZX8 1xPhospho [S282]	1	_TSETSIsPPGSSIG	Ablim3
Q69ZX8	SHYLADsDPLISk.Q69ZX8	5	SHYLADsDPLISk	2.77e-05	6.43221	6.40049	6.70385	6.33948	6.8055	6.07018	6.02105	5.78436	6.36947	6.3495	5.86251	5.72738	5.72701	5.92688	5.86599	5.73227	5.64384	5.75293	5.81666	5.72958	[R].SHYLADSDPLISK.[S]	1xPhospho [S7]; 1xTMTpro [K13]; 1xTMTpro [N-Term]	Q69ZX8 [569-581]	Q69ZX8 1xPhospho [S575]	1	_SHYLADsDPLISK_	Ablim3
Q69ZX8	RFsSGGEEEDFDR.Q69ZX8	5	RFsSGGEEEDFDR	0.0910404	7.69621	7.54449	7.76038	7.48676	7.8648	7.71613	7.77631	7.58996	8.20228	8.11704	7.49883	7.27166	7.84512	7.82386	7.85375	7.47323	7.42299	7.28178	7.71063	7.52321	[R].RFSSGGEEEDFDR.[S]	1xPhospho [S3]; 1xTMTpro [N-Term]	Q69ZX8 [500-512]	Q69ZX8 1xPhospho [S502]	1	_____RFsSGGEEED	Ablim3
Q69ZX8	RTSETsISPPGSSIGSPNR.Q69ZX8	NA	RTSETsISPPGSSIGSPNR	0.314012	5.73879	5.79039	5.93589	5.41597	6.12544	6.05335	5.88004	5.78736	6.11428	6.21091	5.71717	5.71107	6.13474	5.85819	6.20186	5.61931	5.87584	5.74935	5.84247	5.83444	[R].RTSETSISPPGSSIGSPNR.[V]	2xPhospho [S6; S]; 1xTMTpro [N-Term]	Q69ZX8 [275-293]	Q69ZX8 2xPhospho [S280; S]	1	__RTSETsISPPGSS	Ablim3
Q69ZX8	ASsPGYIDSPTYSR.Q69ZX8	NA	ASsPGYIDSPTYSR	0.435701	5.52478	5.53077	6.03134	5.20764	5.62165	5.39835	5.19863	5.45624	5.47368	5.41614	5.47161	5.2262	5.68847	5.53329	5.45225	5.33148	5.30786	5.25314	5.68712	5.41456	[R].ASSPGYIDSPTYSR.[Q]	1xPhospho [S3]; 1xTMTpro [N-Term]	Q69ZX8 [371-384]	Q69ZX8 1xPhospho [S373]	1	_____ASsPGYIDSP	Ablim3
Q6A065	LkGNkHDDGTQsDSENAGAHR.Q6A065	5	LkGNkHDDGTQsDSENAGAHR	2.04e-06	6.82003	6.32944	6.40543	6.19415	6.33797	6.38828	6.83097	6.55399	6.6886	6.36612	5.46933	5.41082	5.9294	6.04864	5.98119	5.24358	5.17912	5.2896	5.27622	5.33832	[R].LKGNKHDDGTQSDSENAGAHR.[R]	1xPhospho [S12]; 2xTMTpro [K2; K5]; 1xTMTpro [N-Term]	Q6A065 [367-387]	Q6A065 1xPhospho [S378]	1	KHDDGTQsDSENAGA	Cep170
Q6A065	SDsLDTDSSmDTTLILk.Q6A065	2	SDsLDTDSSmDTTLILk	0.00174102	5.84105	5.70143	6.29168	6.00361	5.92587	5.8231	6.37005	6.4157	6.68601	6.31502	5.66346	4.93584	5.70586	5.67836	5.85399	5.47853	5.62357	5.4903	5.65228	5.4508	[R].SDSLDTDSSMDTTLILK.[D]	1xPhospho [S3]; 1xOxidation [M10]; 1xTMTpro [K17]; 1xTMTpro [N-Term]	Q6A065 [870-886]	Q6A065 1xPhospho [S872]	1	_____SDsLDTDSSM	Cep170
Q6A065	HDDGTQsDSENAGAHRR.Q6A065	2	HDDGTQsDSENAGAHRR	0.000651532	5.01079	4.07615	4.66192	4.54661	4.30307	4.19019	5.22885	4.98751	5.00405	4.24136	3.49004	3.08252	3.95644	4.20048	4.32232	2.11975	2.92766	2.00616	3.84728	3.2365	[K].HDDGTQSDSENAGAHRR.[C]	1xPhospho [S7]; 1xTMTpro [N-Term]	Q6A065 [372-388]	Q6A065 1xPhospho [S378]	1	_HDDGTQsDSENAGA	Cep170
Q6A065	LGSLSARsDSEATISR.Q6A065	5	LGSLSARsDSEATISR	4.29e-09	8.62996	8.71749	8.75986	8.93328	8.85867	7.42917	7.10942	6.88562	7.56273	7.47193	6.9298	6.95814	6.61538	6.72581	6.57449	5.98014	6.48117	6.46444	6.46746	6.32304	[R].LGSLSARSDSEATISR.[S]	1xPhospho [S8]; 1xTMTpro [N-Term]	Q6A065 [1148-1163]	Q6A065 1xPhospho [S1155]	1	LGSLSARsDSEATIS	Cep170
Q6A065	RFPTDYASTsEDEFGSNR.Q6A065	NA	RFPTDYASTsEDEFGSNR	0.124432	5.16125	4.92527	5.27705	5.12348	5.0613	4.37403	4.8105	4.45431	4.88095	5.05099	4.48829	5.25233	4.99241	4.72547	4.75705	4.66285	4.73491	4.95519	4.98975	5.13622	[R].RFPTDYASTSEDEFGSNR.[N]	1xPhospho [S10]; 1xTMTpro [N-Term]	Q6A065 [1222-1239]	Q6A065 1xPhospho [S1231]	1	PTDYASTsEDEFGSN	Cep170
Q6A065	SIksDVPVYLkR.Q6A065	5	SIksDVPVYLkR	3.74e-05	6.7635	6.91783	7.0166	6.79348	7.12015	6.68381	6.09556	5.66598	6.51	7.0163	6.11348	6.14779	5.65464	5.94624	5.43057	5.1732	5.2732	5.48542	5.37068	5.5457	[K].SIKSDVPVYLKR.[L]	1xPhospho [S4]; 2xTMTpro [K3; K11]; 1xTMTpro [N-Term]	Q6A065 [355-366]	Q6A065 1xPhospho [S358]	1	____SIKsDVPVYLK	Cep170
Q6A065	HDDGTQsDSENAGAHR.Q6A065	5	HDDGTQsDSENAGAHR	0.00157132	5.63151	5.53609	5.76643	5.83983	4.60402	4.31185	5.12478	5.43468	5.64388	4.77404	3.82853	4.47913	4.78638	4.79848	4.65985	4.14798	4.5112	3.62558	3.99132	3.93499	[K].HDDGTQSDSENAGAHR.[R]	1xPhospho [S7]; 1xTMTpro [N-Term]	Q6A065 [372-387]	Q6A065 1xPhospho [S378]	1	_HDDGTQsDSENAGA	Cep170
Q6A065	LRTsPALk.Q6A065	5	LRTsPALk	2.83e-06	6.05415	6.33013	6.06725	6.39722	6.34061	5.82735	5.48775	5.63163	5.90732	5.92961	5.3884	5.11741	5.3586	5.30436	5.3257	4.86597	5.21644	4.79606	5.22149	5.42234	[R].LRTSPALK.[T]	1xPhospho [S4]; 1xTMTpro [K8]; 1xTMTpro [N-Term]	Q6A065 [1247-1254]	Q6A065 1xPhospho [S1250]	1	____LRTsPALK___	Cep170
Q6A065	LGEAsDSELADADk.Q6A065	1	LGEAsDSELADADk	0.000227057	6.33879	5.97447	6.65845	6.3029	6.18524	5.30312	5.6052	5.76922	6.08695	5.82207	5.24714	5.16901	5.58364	5.42584	5.5192	5.76511	5.56709	5.22793	5.43639	5.30195	[R].LGEASDSELADADK.[A]	1xPhospho [S5]; 1xTMTpro [K14]; 1xTMTpro [N-Term]	Q6A065 [1098-1111]	Q6A065 1xPhospho [S1102]	1	___LGEAsDSELADA	Cep170
Q6DFV3	VGGsIRPWk.Q6DFV3	3	VGGsIRPWk	2.66e-08	6.00698	6.06676	6.21516	5.74775	6.0523	6.49896	6.39851	6.76482	6.51368	6.89073	7.09571	7.69122	7.56916	7.53286	7.97343	8.15138	8.13497	7.84435	8.38647	8.28542	[R].VGGSIRPWK.[Q]	1xPhospho [S4]; 1xTMTpro [K9]; 1xTMTpro [N-Term]	Q6DFV3 [944-952]	Q6DFV3 1xPhospho [S947]	1	____VGGsIRPWK__	Arhgap21
Q6DFV3	RNsEGSEAScTEGSLTPSLDSR.Q6DFV3	5	RNsEGSEAScTEGSLTPSLDSR	4.42e-07	4.66409	4.62604	4.84693	4.70959	5.19568	4.63819	4.63225	4.10433	4.74689	4.91372	3.79708	3.39215	3.88434	3.63007	3.59948	2.96099	3.0376	3.56447	3.17935	3.1618	[R].RNSEGSEASCTEGSLTPSLDSR.[R]	1xCarbamidomethyl [C10]; 1xPhospho [S3]; 1xTMTpro [N-Term]	Q6DFV3 [1653-1674]	Q6DFV3 1xPhospho [S1655]	1	_____RNsEGSEASC	Arhgap21
Q6DFV3	GIPsIVR.Q6DFV3	5	GIPsIVR	0.101276	6.70956	6.69155	7.04273	6.73436	6.75082	6.88761	7.22289	6.81568	7.59948	7.42138	6.27359	6.9739	7.34291	6.76476	7.05271	7.21734	7.26149	7.12133	7.19361	7.01567	[R].GIPSIVR.[K]	1xPhospho [S4]; 1xTMTpro [N-Term]	Q6DFV3 [1119-1125]	Q6DFV3 1xPhospho [S1122]	1	____GIPsIVR____	Arhgap21
Q6DFV3	DQGEPVsPSEDEPFSWPGPk.Q6DFV3	NA	DQGEPVsPSEDEPFSWPGPk	0.341252	3.94131	4.34129	4.52748	4.09555	4.47768	3.60284	4.04681	3.99192	4.35869	3.90127	4.1733	4.3401	4.23333	4.18272	4.27041	4.28112	3.73818	3.88302	4.5593	4.44564	[K].DQGEPVSPSEDEPFSWPGPK.[T]	1xPhospho [S7]; 1xTMTpro [K20]; 1xTMTpro [N-Term]	Q6DFV3 [35-54]	Q6DFV3 1xPhospho [S41]	1	_DQGEPVsPSEDEPF	Arhgap21
Q6DFV3	NRsPTLScR.Q6DFV3	5	NRsPTLScR	1.74e-06	6.72164	7.1312	6.98471	7.21307	7.00096	6.30061	6.40948	6.16721	6.95633	6.96493	5.78824	5.41569	5.72698	6.25529	5.60559	4.94196	5.01845	5.6394	4.9205	5.059	[R].NRSPTLSCR.[L]	1xCarbamidomethyl [C8]; 1xPhospho [S3]; 1xTMTpro [N-Term]	Q6DFV3 [1499-1507]	Q6DFV3 1xPhospho [S1501]	1	_____NRsPTLSCR_	Arhgap21
Q6DFV3	kSTsPETk.Q6DFV3	5	kSTsPETk	5.38e-05	7.53463	7.09545	6.41514	6.71137	6.74816	6.99866	6.96793	6.61425	6.42212	6.16482	5.63887	5.27055	5.91957	5.94483	5.71882	4.89529	4.85547	4.94527	5.76698	5.74007	[K].KSTSPETK.[H]	1xPhospho [S4]; 2xTMTpro [K1; K8]; 1xTMTpro [N-Term]	Q6DFV3 [1551-1558]	Q6DFV3 1xPhospho [S1554]	1	____KSTsPETK___	Arhgap21
Q6DFV3	STsPETk.Q6DFV3	5	STsPETk	1.81e-08	7.99036	7.63926	7.50493	7.59919	7.2087	7.27736	7.61651	6.93686	7.23149	7.3842	6.0628	5.2747	5.99943	6.0073	5.87573	4.6777	4.94411	5.12589	5.3013	5.23607	[K].STSPETK.[H]	1xPhospho [S3]; 1xTMTpro [K7]; 1xTMTpro [N-Term]	Q6DFV3 [1552-1558]	Q6DFV3 1xPhospho [S1554]	1	_____STsPETK___	Arhgap21
Q6DFV3	QLsHDQESVGPPSLDGQHSSk.Q6DFV3	NA	QLsHDQESVGPPSLDGQHSSk	0.86727	6.36055	6.29284	5.94822	6.11104	6.10804	5.9033	5.93801	5.94203	6.28953	6.1737	5.74011	5.95953	6.28071	6.19354	6.5469	6.04823	6.0276	5.85315	6.47751	6.36086	[R].QLSHDQESVGPPSLDGQHSSK.[T]	1xPhospho [S3]; 1xTMTpro [K21]; 1xTMTpro [N-Term]	Q6DFV3 [848-868]	Q6DFV3 1xPhospho [S850]	1	_____QLsHDQESVG	Arhgap21
Q6DFV3	TQSPHsPkEESER.Q6DFV3	6	TQSPHsPkEESER	0.000179167	6.24146	6.07181	6.50212	6.16964	6.12432	6.24623	6.26354	6.34096	6.12939	6.46491	6.43588	6.37327	6.27924	6.6187	6.41809	6.76229	6.81177	6.58944	6.80604	7.03847	[K].TQSPHSPKEESER.[K]	1xPhospho [S6]; 1xTMTpro [K8]; 1xTMTpro [N-Term]	Q6DFV3 [1087-1099]	Q6DFV3 1xPhospho [S1092]	1	__TQSPHsPKEESER	Arhgap21
Q6DFV3	HVSsLk.Q6DFV3	4	HVSsLk	0.00326808	6.296	5.77334	6.11799	6.10335	5.78174	6.26168	7.44706	7.60343	7.13354	6.63776	6.46774	6.56674	7.13256	7.1329	7.21175	7.31113	7.21613	6.48972	7.66243	7.30143	[K].HVSSLK.[G]	1xPhospho [S4]; 1xTMTpro [K6]; 1xTMTpro [N-Term]	Q6DFV3 [892-897]	Q6DFV3 1xPhospho [S895]	1	____HVSsLK_____	Arhgap21
Q6DFV3	RTsQGFGFTLR.Q6DFV3	3	RTsQGFGFTLR	0.00038419	5.98648	5.94841	6.53957	6.18872	6.35523	6.3402	6.20698	6.31085	6.40423	6.47261	6.70741	6.89757	6.72931	6.70604	6.49703	6.74572	6.89656	6.91476	6.56607	6.73488	[K].RTSQGFGFTLR.[H]	1xPhospho [S3]; 1xTMTpro [N-Term]	Q6DFV3 [60-70]	Q6DFV3 1xPhospho [S62]	1	_____RTsQGFGFTL	Arhgap21
Q6DFV3	SVsQERLEDSVLmk.Q6DFV3	3	SVsQERLEDSVLmk	0.000727549	7.45202	7.31604	7.44615	7.41778	7.54038	7.46697	7.44736	7.54326	7.59812	7.71588	7.71511	7.41004	7.2734	7.55656	7.45431	7.86121	7.75903	7.78607	7.7884	7.85634	[R].SVSQERLEDSVLMK.[Y]	1xPhospho [S3]; 1xOxidation [M13]; 1xTMTpro [K14]; 1xTMTpro [N-Term]	Q6DFV3 [451-464]	Q6DFV3 1xPhospho [S453]	1	_____SVsQERLEDS	Arhgap21
Q6DFV3	QSLsIR.Q6DFV3	3	QSLsIR	0.163339	6.00598	6.05456	6.48265	6.31877	6.51	6.27682	6.38323	5.68272	6.68341	6.82546	5.90583	6.71457	6.73216	6.34912	6.68456	7.03924	7.0334	6.55887	6.67401	6.55912	[R].QSLSIR.[Q]	1xPhospho [S4]; 1xTMTpro [N-Term]	Q6DFV3 [1070-1075]	Q6DFV3 1xPhospho [S1073]	1	____QSLsIR_____	Arhgap21
Q6EDY6	SDSRGsPQGGRR.Q6EDY6	2	SDSRGsPQGGRR	5.52e-06	3.91442	3.60873	4.38532	4.7784	3.8884	4.34307	3.81743	3.61016	4.02746	4.11935	3.92933	3.70917	3.85782	3.9666	3.64289	1.66151	2.22954	2.79946	2.15587	2.40439	[R].SDSRGSPQGGRR.[Y]	1xPhospho [S6]; 1xTMTpro [N-Term]	Q6EDY6 [1148-1159]	Q6EDY6 1xPhospho [S1153]	1	__SDSRGsPQGGRR_	Carmil1
Q6EDY6	IFPGLsPLR.Q6EDY6	NA	IFPGLsPLR	0.269828	3.04599	4.3918	3.45157	4.15079	3.5715	3.71214	3.78594	3.97923	4.05677	4.0582	3.68763	4.09204	4.10967	4.01887	4.12041	3.45484	3.52038	3.56632	4.09433	3.35828	[R].IFPGLSPLR.[I]	1xPhospho [S6]; 1xTMTpro [N-Term]	Q6EDY6 [117-125]	Q6EDY6 1xPhospho [S122]	1	__IFPGLsPLR____	Carmil1
Q6I6G8	QRsHSAGEVGEDSR.Q6I6G8	NA	QRsHSAGEVGEDSR	0.428881	3.7739	3.97569	4.25399	4.48658	4.85551	4.84366	4.75929	3.74269	4.61335	4.96861	4.60816	5.17114	4.20271	4.65348	4.70954	4.54851	4.91683	4.76941	4.42414	4.30271	[R].QRSHSAGEVGEDSR.[H]	1xPhospho [S3]; 1xTMTpro [N-Term]	Q6I6G8 [1044-1057]	Q6I6G8 1xPhospho [S1046]	1	_____QRsHSAGEVG	Hecw2
Q6I6G8	SHsAGEVGEDSR.Q6I6G8	3	SHsAGEVGEDSR	0.024301	4.49671	4.51967	4.86755	4.74713	3.13113	4.68856	4.60951	5.6817	5.2012	5.42975	5.29546	4.70487	5.48192	6.34652	5.98678	5.18956	5.02819	5.26431	5.49031	5.84387	[R].SHSAGEVGEDSR.[H]	1xPhospho [S3]; 1xTMTpro [N-Term]	Q6I6G8 [1046-1057]	Q6I6G8 1xPhospho [S1048]	1	_____SHsAGEVGED	Hecw2
Q6I6G8	SNsIQQmEQLNR.Q6I6G8	5	SNsIQQmEQLNR	0.0951243	5.10279	5.37436	5.27251	5.22567	5.18147	4.91062	5.00788	4.7509	5.26352	5.31591	4.66169	5.128	5.18169	5.04087	5.35723	4.4779	4.64333	4.89995	4.97036	5.13356	[R].SNSIQQMEQLNR.[R]	1xPhospho [S3]; 1xOxidation [M7]; 1xTMTpro [N-Term]	Q6I6G8 [856-867]	Q6I6G8 1xPhospho [S858]	1	_____SNsIQQMEQL	Hecw2
Q6I6G8	ANsDTDLVTSESR.Q6I6G8	8	ANsDTDLVTSESR	0.00233388	7.89866	8.07136	8.2761	8.03599	8.18506	8.45341	8.26013	8.18893	8.55839	8.75696	8.51132	8.3453	8.58222	8.43891	8.5864	8.02223	8.22704	8.20516	8.18857	8.14681	[R].ANSDTDLVTSESR.[S]	1xPhospho [S3]; 1xTMTpro [N-Term]	Q6I6G8 [46-58]	Q6I6G8 1xPhospho [S48]	1	_____ANsDTDLVTS	Hecw2
Q6I6G8	SNsIQQmEQLNRR.Q6I6G8	3	SNsIQQmEQLNRR	0.00089381	5.55645	5.61038	5.56498	5.55939	5.86227	6.03202	5.91093	5.57901	5.97463	6.27074	6.19628	6.32116	6.39955	6.09555	6.3203	6.106	6.03936	6.13033	6.40378	6.68879	[R].SNSIQQMEQLNRR.[Y]	1xPhospho [S3]; 1xOxidation [M7]; 1xTMTpro [N-Term]	Q6I6G8 [856-868]	Q6I6G8 1xPhospho [S858]	1	_____SNsIQQMEQL	Hecw2
Q6I6G8	SmGAsPk.Q6I6G8	7	SmGAsPk	0.00265718	6.39455	6.15537	6.33411	6.42272	6.16105	6.95729	7.10384	7.37967	7.06939	7.28396	7.03018	6.24286	7.08582	7.24191	6.8891	6.59551	6.47895	6.37341	7.14068	7.00218	[R].SMGASPK.[L]	1xPhospho [S5]; 1xOxidation [M2]; 1xTMTpro [K7]; 1xTMTpro [N-Term]	Q6I6G8 [439-445]	Q6I6G8 1xPhospho [S443]	1	___SMGAsPK_____	Hecw2
Q6I6G8	ENVLPHSTsR.Q6I6G8	NA	ENVLPHSTsR	0.174684	5.50972	5.61142	5.90467	5.3839	5.71792	5.59886	5.47891	5.5667	5.9609	5.98247	5.68487	5.74875	6.06494	6.01863	6.06546	5.77868	5.69936	5.67213	6.04604	5.85376	[R].ENVLPHSTSR.[S]	1xPhospho [S9]; 1xTMTpro [N-Term]	Q6I6G8 [907-916]	Q6I6G8 1xPhospho [S915]	1	NVLPHSTsR______	Hecw2
Q6IR34	LTsPAAAEkPDLAGYEAQGARPk.Q6IR34	5	LTsPAAAEkPDLAGYEAQGARPk	4.81e-07	6.67622	6.74945	6.47797	6.60424	6.80315	6.60895	6.57517	6.3323	6.64242	6.72607	5.68561	5.41978	5.67523	5.95569	5.44838	5.33078	5.25527	5.56534	5.90413	5.40731	[R].LTSPAAAEKPDLAGYEAQGARPK.[R]	1xPhospho [S3]; 2xTMTpro [K9; K23]; 1xTMTpro [N-Term]	Q6IR34 [382-404]	Q6IR34 1xPhospho [S384]	1	_____LTsPAAAEKP	Gpsm1
Q6IR34	VDLAGsPEQEASGLPDPQQQcPPGAS.Q6IR34	5	VDLAGsPEQEASGLPDPQQQcPPGAS	0.00151038	4.42709	4.28998	4.82361	4.41773	4.75425	4.20823	4.66466	4.47532	4.7032	4.53492	3.92024	3.23077	4.07393	4.13577	4.00761	3.30752	3.79296	3.19949	4.04746	4.05859	[R].VDLAGSPEQEASGLPDPQQQCPPGAS.[-]	1xCarbamidomethyl [C21]; 1xPhospho [S6]; 1xTMTpro [N-Term]	Q6IR34 [648-673]	Q6IR34 1xPhospho [S653]	1	__VDLAGsPEQEASG	Gpsm1
Q6KAU4	LPPsPTR.Q6KAU4	1	LPPsPTR	0.14307	7.89423	7.83003	7.95581	8.08054	7.84673	7.83341	7.81108	7.7288	7.82728	7.88139	7.75214	7.66942	8.01067	7.67535	8.01815	7.64116	7.41098	7.47063	7.90164	7.90238	[R].LPPSPTR.[C]	1xPhospho [S4]; 1xTMTpro [N-Term]	Q6KAU4 [304-310]	Q6KAU4 1xPhospho [S307]	1	____LPPsPTR____	Mvb12b
Q6KAU4	HIsLTLPATFR.Q6KAU4	5	HIsLTLPATFR	0.0394538	4.08903	3.9026	4.34131	3.91615	5.0886	3.96561	3.92429	3.85347	4.14779	4.12001	4.04808	3.98088	3.88308	4.13169	3.77768	2.52831	3.82062	3.98941	3.75567	2.69986	[R].HISLTLPATFR.[G]	1xPhospho [S3]; 1xTMTpro [N-Term]	Q6KAU4 [220-230]	Q6KAU4 1xPhospho [S222]	1	_____HIsLTLPATF	Mvb12b
Q6NS60	ALGVGGAGcGVQGLAsLAR.Q6NS60	5	ALGVGGAGcGVQGLAsLAR	0.0233697	3.79663	3.77672	4.19299	4.01486	4.15401	3.71459	3.62292	3.52042	3.96389	3.87719	3.68613	3.71255	3.84748	3.26748	3.73632	3.48972	3.16669	3.77967	3.64018	3.45659	[R].ALGVGGAGCGVQGLASLAR.[N]	1xCarbamidomethyl [C9]; 1xPhospho [S16]; 1xTMTpro [N-Term]	Q6NS60 [745-763]	Q6NS60 1xPhospho [S760]	1	CGVQGLAsLAR____	Fbxo41
Q6NS60	RHsTEGEEGDVSDVGSR.Q6NS60	3	RHsTEGEEGDVSDVGSR	1.63e-05	4.58792	3.87845	4.6853	4.49392	4.79909	4.96662	5.10629	5.30563	5.22178	5.31005	5.3264	5.42922	5.25062	5.44534	5.32833	5.75467	5.56809	5.63734	5.36117	5.67396	[R].RHSTEGEEGDVSDVGSR.[T]	1xPhospho [S3]; 1xTMTpro [N-Term]	Q6NS60 [474-490]	Q6NS60 1xPhospho [S476]	1	_____RHsTEGEEGD	Fbxo41
Q6NS60	FRsLSSLR.Q6NS60	NA	FRsLSSLR	0.40948	5.99001	5.95393	5.91421	6.00777	6.00947	5.99667	5.78447	5.79942	6.50635	6.59547	5.86779	6.16441	6.31688	6.26513	6.30758	6.0658	6.16555	6.01766	6.40512	6.56522	[R].FRSLSSLR.[A]	1xPhospho [S3]; 1xTMTpro [N-Term]	Q6NS60 [19-26]	Q6NS60 1xPhospho [S21]	1	_____FRsLSSLR__	Fbxo41
Q6NS60	SNEVIsPEILk.Q6NS60	4	SNEVIsPEILk	0.00452708	3.83844	4.23129	4.39608	4.13052	4.38868	4.3009	4.67642	5.0963	4.72333	4.6573	4.68685	4.60928	4.59804	4.8851	5.11991	5.33603	4.77983	4.53494	4.96116	5.24005	[R].SNEVISPEILK.[M]	1xPhospho [S6]; 1xTMTpro [K11]; 1xTMTpro [N-Term]	Q6NS60 [540-550]	Q6NS60 1xPhospho [S545]	1	__SNEVIsPEILK__	Fbxo41
Q6NS60	RVERGsPSR.Q6NS60	4	RVERGsPSR	0.119791	3.7676	3.93769	5.04393	4.28267	4.2525	4.35526	4.51499	5.23331	4.39671	4.38932	4.60349	4.34402	4.76726	5.32112	4.81855	5.06754	4.85781	4.4548	5.17605	4.78885	[R].RVERGSPSR.[S]	1xPhospho [S6]; 1xTMTpro [N-Term]	Q6NS60 [531-539]	Q6NS60 1xPhospho [S536]	1	__RVERGsPSR____	Fbxo41
Q6NSW3	LTVNAPVkANsLDGFAQNcPQDSVNVQPVSR.Q6NSW3	5	LTVNAPVkANsLDGFAQNcPQDSVNVQPVSR	0.017009	3.86114	3.35857	3.64092	3.40573	3.81974	3.63815	3.64215	2.9478	3.86913	3.9408	2.73746	3.20179	3.37936	2.96884	3.21809	2.87645	2.65296	3.13305	3.00505	3.53736	[R].LTVNAPVKANSLDGFAQNCPQDSVNVQPVSR.[A]	1xCarbamidomethyl [C19]; 1xPhospho [S11]; 1xTMTpro [K8]; 1xTMTpro [N-Term]	Q6NSW3 [1234-1264]	Q6NSW3 1xPhospho [S1244]	1	NAPVKANsLDGFAQN	Sphkap
Q6NSW3	ANsLDGFAQNcPQDSVNVQPVSR.Q6NSW3	1	ANsLDGFAQNcPQDSVNVQPVSR	0.00143546	4.02049	4.75548	4.75691	5.12941	5.05675	4.26171	4.25911	3.99426	4.36732	4.70381	4.02444	3.89908	3.87782	4.06967	4.06477	4.1141	3.44941	3.97641	3.83452	3.40497	[K].ANSLDGFAQNCPQDSVNVQPVSR.[A]	1xCarbamidomethyl [C11]; 1xPhospho [S3]; 1xTMTpro [N-Term]	Q6NSW3 [1242-1264]	Q6NSW3 1xPhospho [S1244]	1	_____ANsLDGFAQN	Sphkap
Q6NSW3	SNsLLESTDYWLQNQR.Q6NSW3	5	SNsLLESTDYWLQNQR	0.000585763	4.7223	4.27661	4.10461	4.74567	4.82887	4.28314	4.45793	3.98976	4.58779	4.5804	4.179	3.54211	3.73689	4.08983	3.7466	3.70767	3.35047	3.38695	3.65385	3.97595	[R].SNSLLESTDYWLQNQR.[T]	1xPhospho [S3]; 1xTMTpro [N-Term]	Q6NSW3 [48-63]	Q6NSW3 1xPhospho [S50]	1	_____SNsLLESTDY	Sphkap
Q6NSW3	RSsHDWTTGLLSPSTR.Q6NSW3	5	RSsHDWTTGLLSPSTR	0.00542315	5.91635	6.30281	6.60202	6.32482	6.61524	6.59641	6.4233	6.06501	6.91437	6.91761	6.02648	6.03972	5.8943	6.12961	6.2284	5.82418	5.75456	5.87025	6.1195	6.01423	[R].RSSHDWTTGLLSPSTR.[S]	1xPhospho [S3]; 1xTMTpro [N-Term]	Q6NSW3 [1199-1214]	Q6NSW3 1xPhospho [S1201]	1	_____RSsHDWTTGL	Sphkap
Q6NVE8	EAENTANQAGNEsPVQELR.Q6NVE8	NA	EAENTANQAGNEsPVQELR	0.493771	5.00077	4.94896	5.00194	5.12289	4.54477	4.51202	4.72322	5.25284	4.98635	4.97794	5.04152	4.4178	5.08804	5.21262	5.17282	4.9369	4.6868	4.48989	4.79903	4.75152	[K].EAENTANQAGNESPVQELR.[Q]	1xPhospho [S13]; 1xTMTpro [N-Term]	Q6NVE8 [38-56]	Q6NVE8 1xPhospho [S50]	1	ANQAGNEsPVQELR_	Wdr44
Q6NVE8	EYVSNDATQsDDEEkLQSQQTDTDGGR.Q6NVE8	3	EYVSNDATQsDDEEkLQSQQTDTDGGR	0.0254436	5.78376	5.55591	6.30164	6.16881	6.20678	6.13515	6.42402	6.38615	6.00369	6.16345	6.19156	6.12719	6.32982	6.19577	6.5748	6.62156	6.62933	6.43196	6.46307	6.34355	[K].EYVSNDATQSDDEEKLQSQQTDTDGGR.[L]	1xPhospho [S10]; 1xTMTpro [K15]; 1xTMTpro [N-Term]	Q6NVE8 [396-422]	Q6NVE8 1xPhospho [S405]	1	VSNDATQsDDEEKLQ	Wdr44
Q6NZJ6	AAsLTEDR.Q6NZJ6	NA	AAsLTEDR	0.314162	7.65456	7.58112	7.80128	7.78801	7.33725	7.64585	7.87482	7.92144	8.20266	7.84033	7.47638	7.50128	8.38072	8.00446	7.93257	7.42672	7.57625	7.24851	8.07332	7.73514	[K].AASLTEDR.[G]	1xPhospho [S3]; 1xTMTpro [N-Term]	Q6NZJ6 [1209-1216]	Q6NZJ6 1xPhospho [S1211]	1	_____AAsLTEDR__	Eif4g1
Q6NZJ6	AASLtEDRGRDPVkR.Q6NZJ6	5	AASLtEDRGRDPVkR	0.154973	6.08743	6.15176	6.17574	6.49205	6.58283	6.41952	6.03543	5.80529	6.12958	6.85291	5.98371	6.41525	6.38605	6.12012	5.86852	5.4732	5.64065	5.93901	6.02914	6.19894	[K].AASLTEDRGRDPVKR.[E]	1xPhospho [T5]; 1xTMTpro [K14]; 1xTMTpro [N-Term]	Q6NZJ6 [1209-1223]	Q6NZJ6 1xPhospho [T1213]	1	___AASLtEDRGRDP	Eif4g1
Q6NZJ6	EATLPPVsPPk.Q6NZJ6	5	EATLPPVsPPk	0.0550311	5.33439	5.05798	5.13183	5.75352	5.59161	5.11521	5.36213	5.5701	5.47217	5.23462	4.54151	4.7337	5.40633	4.80818	5.07235	4.83522	4.72004	4.78938	5.44976	5.17046	[R].EATLPPVSPPK.[A]	1xPhospho [S8]; 1xTMTpro [K11]; 1xTMTpro [N-Term]	Q6NZJ6 [1224-1234]	Q6NZJ6 1xPhospho [S1231]	1	EATLPPVsPPK____	Eif4g1
Q6NZJ6	EAEDEEsDHN.Q6NZJ6	NA	EAEDEEsDHN	0.628616	4.20809	3.34934	4.00937	3.30304	4.35812	3.95608	4.058	3.97287	3.3315	4.12204	3.41718	3.03351	3.98093	4.00045	3.47279	4.05915	3.58993	3.44845	3.84556	4.3444	[R].EAEDEESDHN.[-]	1xPhospho [S7]; 1xTMTpro [N-Term]	Q6NZJ6 [1591-1600]	Q6NZJ6 1xPhospho [S1597]	1	_EAEDEEsDHN____	Eif4g1
Q6NZJ6	kAAsLTEDR.Q6NZJ6	7	kAAsLTEDR	0.0150825	7.50466	7.21812	7.48152	7.60226	7.29296	7.94719	8.35889	8.33674	8.21751	8.04585	7.52386	7.43829	8.3934	8.36823	7.96974	7.7561	7.71866	7.24253	8.22292	7.81243	[R].KAASLTEDR.[G]	1xPhospho [S4]; 1xTMTpro [K1]; 1xTMTpro [N-Term]	Q6NZJ6 [1208-1216]	Q6NZJ6 1xPhospho [S1211]	1	____KAAsLTEDR__	Eif4g1
Q6NZJ6	SSLsRER.Q6NZJ6	2	SSLsRER	0.00441218	6.67365	6.25805	6.38581	6.3943	6.18506	6.48772	6.89507	7.16082	7.00543	6.5132	6.20298	5.41873	6.65121	6.78691	5.86605	5.38991	5.55273	5.44751	5.99911	6.13885	[R].SSLSRER.[G]	1xPhospho [S4]; 1xTMTpro [N-Term]	Q6NZJ6 [1146-1152]	Q6NZJ6 1xPhospho [S1149]	1	____SSLsRER____	Eif4g1
Q6NZJ6	EATLPPVsPPkAALSVDEVEk.Q6NZJ6	5	EATLPPVsPPkAALSVDEVEk	0.115711	4.92127	4.9207	5.49562	5.11163	5.53187	5.01843	5.15049	4.93612	5.54825	5.28511	4.85457	5.08388	5.01099	5.10498	5.13436	4.66859	5.10407	4.49003	4.90178	5.01587	[R].EATLPPVSPPKAALSVDEVEK.[K]	1xPhospho [S8]; 2xTMTpro [K11; K21]; 1xTMTpro [N-Term]	Q6NZJ6 [1224-1244]	Q6NZJ6 1xPhospho [S1231]	1	EATLPPVsPPKAALS	Eif4g1
Q6NZJ6	ITkPGsIDSNNQLFAPGGR.Q6NZJ6	5	ITkPGsIDSNNQLFAPGGR	0.0347059	7.86634	7.94484	7.50368	7.34882	7.51903	7.83823	7.33469	7.00745	7.80968	7.69963	7.02597	7.17362	7.87987	7.54809	7.23104	6.60037	6.96349	6.81774	7.35206	7.19262	[K].ITKPGSIDSNNQLFAPGGR.[L]	1xPhospho [S6]; 1xTMTpro [K3]; 1xTMTpro [N-Term]	Q6NZJ6 [1076-1094]	Q6NZJ6 1xPhospho [S1081]	1	__ITKPGsIDSNNQL	Eif4g1
Q6NZL0	EQSEsLSELR.Q6NZL0	NA	EQSEsLSELR	0.662793	7.45795	7.16462	7.36765	7.27247	6.85139	7.0912	7.67455	7.75595	7.58797	7.14982	6.84448	6.84017	7.46789	7.33572	7.62004	7.32297	7.21711	6.7669	7.69455	7.54271	[R].EQSESLSELR.[Q]	1xPhospho [S5]; 1xTMTpro [N-Term]	Q6NZL0 [635-644]	Q6NZL0 1xPhospho [S639]	1	___EQSEsLSELR__	Soga3
Q6NZL0	EGPIGGEsDSEEVR.Q6NZL0	1	EGPIGGEsDSEEVR	3.47e-05	6.61134	6.48206	6.76206	6.73156	6.62379	6.11897	6.157	6.02155	6.38466	6.04997	5.74839	5.75137	6.26112	5.94285	5.91222	5.85878	5.95973	5.58116	5.97436	6.0535	[R].EGPIGGESDSEEVR.[N]	1xPhospho [S8]; 1xTMTpro [N-Term]	Q6NZL0 [772-785]	Q6NZL0 1xPhospho [S779]	1	EGPIGGEsDSEEVR_	Soga3
Q6NZL0	AQsPARPR.Q6NZL0	5	AQsPARPR	9.46e-11	8.86335	8.88557	8.66949	8.83699	8.674	7.81959	7.60528	7.1998	7.80121	7.66648	6.5062	6.42209	6.26138	6.5082	6.18711	5.64695	5.68825	6.03023	5.86729	5.61475	[R].AQSPARPR.[D]	1xPhospho [S3]; 1xTMTpro [N-Term]	Q6NZL0 [39-46]	Q6NZL0 1xPhospho [S41]	1	_____AQsPARPR__	Soga3
Q6P4S6	QLsADSAEAHSLNmNR.Q6P4S6	6	QLsADSAEAHSLNmNR	0.0349942	6.09439	6.21054	6.26367	6.36054	6.33612	6.12879	5.95975	5.65734	6.15592	6.45883	6.13094	6.66857	6.7086	6.09709	6.68579	6.33519	6.47748	6.719	6.54306	6.64615	[K].QLSADSAEAHSLNMNR.[F]	1xPhospho [S3]; 1xOxidation [M14]; 1xTMTpro [N-Term]	Q6P4S6 [854-869]	Q6P4S6 1xPhospho [S856]	1	_____QLsADSAEAH	Sik3
Q6P542	LkQLSVPAsDEEDEVPAPIPR.Q6P542	1	LkQLSVPAsDEEDEVPAPIPR	0.000384577	6.36669	6.49159	6.46358	6.747	6.64385	5.53438	5.23381	4.6227	5.67564	6.00383	5.92969	5.94457	5.75627	5.6503	5.67871	5.35264	5.40368	5.77273	5.65023	5.84075	[R].LKQLSVPASDEEDEVPAPIPR.[G]	1xPhospho [S9]; 1xTMTpro [K2]; 1xTMTpro [N-Term]	Q6P542 [99-119]	Q6P542 1xPhospho [S107]	1	KQLSVPAsDEEDEVP	Abcf1
Q6P542	QLSVPAsDEEDEVPAPIPR.Q6P542	5	QLSVPAsDEEDEVPAPIPR	0.0326732	4.91893	4.57603	4.97094	5.15079	4.72508	4.39609	4.7783	4.69335	4.87723	4.81831	3.88857	4.57495	4.55738	4.52628	4.70335	4.213	4.37024	4.42134	4.55568	4.60229	[K].QLSVPASDEEDEVPAPIPR.[G]	1xPhospho [S7]; 1xTMTpro [N-Term]	Q6P542 [101-119]	Q6P542 1xPhospho [S107]	1	_QLSVPAsDEEDEVP	Abcf1
Q6P9K8	QVLPSGASHFtPPQTPTk.Q6P9K8	NA	QVLPSGASHFtPPQTPTk	0.0917087	4.51346	4.57931	4.56895	4.32566	5.08358	3.94854	4.03461	4.34519	4.41139	4.38308	3.82906	3.92184	4.4245	4.58482	4.22859	4.25674	4.37481	4.23452	4.68604	4.55429	[R].QVLPSGASHFTPPQTPTK.[A]	1xPhospho [T11]; 1xTMTpro [K18]; 1xTMTpro [N-Term]	Q6P9K8 [769-786]	Q6P9K8 1xPhospho [T779]	1	PSGASHFtPPQTPTK	Caskin1
Q6P9K8	RGsGEPAEQSHFmEDGTAR.Q6P9K8	8	RGsGEPAEQSHFmEDGTAR	0.042114	4.44736	4.77793	4.76058	4.61784	4.43126	5.27342	5.07007	4.36817	5.56968	5.6495	4.86621	5.01737	5.41297	5.1088	5.31552	4.98245	4.99284	4.84756	5.29556	5.05496	[R].RGSGEPAEQSHFMEDGTAR.[Q]	1xPhospho [S3]; 1xOxidation [M13]; 1xTMTpro [N-Term]	Q6P9K8 [1081-1099]	Q6P9K8 1xPhospho [S1083]	1	_____RGsGEPAEQS	Caskin1
Q6P9K8	ESsLSGR.Q6P9K8	3	ESsLSGR	0.000821222	6.50086	6.58209	6.98504	6.51448	6.73715	7.26824	6.79457	6.52773	7.69346	7.68652	7.5783	7.93099	8.22821	8.1833	7.52383	7.53592	7.58282	7.51014	8.09459	7.37865	[R].ESSLSGR.[A]	1xPhospho [S3]; 1xTMTpro [N-Term]	Q6P9K8 [697-703]	Q6P9K8 1xPhospho [S699]	1	_____ESsLSGR___	Caskin1
Q6P9K8	AQPGsPQALGGPHGPATAk.Q6P9K8	3	AQPGsPQALGGPHGPATAk	0.0718427	7.34413	7.39841	7.80988	7.78355	7.81649	7.65715	7.47766	7.71424	7.69631	7.75031	8.00004	7.67446	8.09846	8.00089	7.94527	7.75261	7.69221	7.69389	8.29743	8.17246	[K].AQPGSPQALGGPHGPATAK.[V]	1xPhospho [S5]; 1xTMTpro [K19]; 1xTMTpro [N-Term]	Q6P9K8 [787-805]	Q6P9K8 1xPhospho [S791]	1	___AQPGsPQALGGP	Caskin1
Q6P9K8	kVPLPGPGsPEVk.Q6P9K8	4	kVPLPGPGsPEVk	0.00014694	7.75756	7.7327	7.51371	7.69525	7.77722	8.19869	8.28282	8.37135	8.70113	8.72241	8.44798	8.25428	8.81363	8.93452	8.66186	8.32824	8.32775	8.22579	8.83894	8.64658	[K].KVPLPGPGSPEVK.[R]	1xPhospho [S9]; 2xTMTpro [K1; K13]; 1xTMTpro [N-Term]	Q6P9K8 [1251-1263]	Q6P9K8 1xPhospho [S1259]	1	VPLPGPGsPEVK___	Caskin1
Q6P9K8	VEASAtLkR.Q6P9K8	5	VEASAtLkR	6.8e-05	5.94485	6.18517	6.13696	6.1654	6.4099	5.45998	5.26622	4.3705	5.78369	5.69815	5.03611	5.44922	5.28681	4.739	4.84177	4.59164	4.64539	4.65559	4.61239	4.63931	[R].VEASATLKR.[R]	1xPhospho [T6]; 1xTMTpro [K8]; 1xTMTpro [N-Term]	Q6P9K8 [1120-1128]	Q6P9K8 1xPhospho [T1125]	1	__VEASAtLKR____	Caskin1
Q6P9K8	kVPLPGPGsPEVkR.Q6P9K8	3	kVPLPGPGsPEVkR	0.00965375	7.12808	7.07323	7.71181	7.69307	7.72391	7.72745	7.46301	7.35517	7.80487	7.96939	7.93171	7.96718	7.98933	8.00227	7.80894	7.89576	7.86952	8.05491	7.9933	8.04719	[K].KVPLPGPGSPEVKR.[A]	1xPhospho [S9]; 2xTMTpro [K1; K13]; 1xTMTpro [N-Term]	Q6P9K8 [1251-1264]	Q6P9K8 1xPhospho [S1259]	1	VPLPGPGsPEVKR__	Caskin1
Q6P9K8	VPLPGPGsPEVkR.Q6P9K8	NA	VPLPGPGsPEVkR	0.431089	5.14139	5.48433	5.5644	5.69916	5.57448	5.25487	5.30979	5.19365	5.49518	5.37533	5.29611	5.33394	5.78032	5.60912	5.46034	5.15905	5.20173	5.43369	5.52119	5.59871	[K].VPLPGPGSPEVKR.[A]	1xPhospho [S8]; 1xTMTpro [K12]; 1xTMTpro [N-Term]	Q6P9K8 [1252-1264]	Q6P9K8 1xPhospho [S1259]	1	VPLPGPGsPEVKR__	Caskin1
Q6P9K8	RPPEGHPTPRPAsPEPGR.Q6P9K8	NA	RPPEGHPTPRPAsPEPGR	0.477902	4.26837	3.95012	3.89736	4.55114	4.00218	4.26947	3.99527	4.36576	4.39518	4.31442	4.39856	3.91384	4.7138	4.94098	4.18117	4.21259	3.88538	4.16784	4.64482	4.09497	[R].RPPEGHPTPRPASPEPGR.[V]	1xPhospho [S13]; 1xTMTpro [N-Term]	Q6P9K8 [1024-1041]	Q6P9K8 1xPhospho [S1036]	1	HPTPRPAsPEPGR__	Caskin1
Q6P9K8	SLPQsPTHR.Q6P9K8	3	SLPQsPTHR	0.00218475	7.06397	6.88545	7.17237	7.50324	7.48269	6.823	6.79005	7.54854	7.10176	7.19008	7.51056	7.31877	8.19917	7.81182	7.69263	7.97125	7.78268	7.65532	8.0046	7.82874	[R].SLPQSPTHR.[G]	1xPhospho [S5]; 1xTMTpro [N-Term]	Q6P9K8 [824-832]	Q6P9K8 1xPhospho [S828]	1	___SLPQsPTHR___	Caskin1
Q6P9K8	IQGsPTPASk.Q6P9K8	NA	IQGsPTPASk	0.683181	7.16636	7.25905	7.24886	7.64846	7.50532	7.32078	7.09409	7.3639	7.32078	7.44478	7.39502	6.86373	7.54739	7.51961	7.02863	6.73448	6.77685	6.74138	7.66802	7.67797	[K].IQGSPTPASK.[K]	1xPhospho [S4]; 1xTMTpro [K10]; 1xTMTpro [N-Term]	Q6P9K8 [1241-1250]	Q6P9K8 1xPhospho [S1244]	1	____IQGsPTPASK_	Caskin1
Q6P9K8	VPLPGPGsPEVk.Q6P9K8	3	VPLPGPGsPEVk	0.00169618	4.32223	4.29184	5.32913	4.79438	5.11084	4.49697	4.14658	4.57928	4.97623	4.94147	4.84074	5.4132	5.06757	4.89009	5.19791	5.67585	5.4923	5.45883	5.66155	5.95447	[K].VPLPGPGSPEVK.[R]	1xPhospho [S8]; 1xTMTpro [K12]; 1xTMTpro [N-Term]	Q6P9K8 [1252-1263]	Q6P9K8 1xPhospho [S1259]	1	VPLPGPGsPEVK___	Caskin1
Q6P9K8	VkPTPQLLPPTDRPmsPR.Q6P9K8	5	VkPTPQLLPPTDRPmsPR	0.00936349	6.02162	6.07465	5.82802	6.07047	6.1123	5.76783	5.43189	5.84709	5.82811	5.82902	5.56689	5.99607	6.4307	6.17446	6.22397	5.29145	5.18802	5.62571	5.79044	5.69864	[K].VKPTPQLLPPTDRPMSPR.[S]	1xPhospho [S16]; 1xOxidation [M15]; 1xTMTpro [K2]; 1xTMTpro [N-Term]	Q6P9K8 [806-823]	Q6P9K8 1xPhospho [S821]	1	PPTDRPMsPR_____	Caskin1
Q6P9K8	LLGsTk.Q6P9K8	8	LLGsTk	0.0011946	7.31609	7.29148	7.51131	7.48952	7.39114	8.20432	8.21786	7.65716	8.47355	8.56295	7.7325	7.95661	8.62732	8.30208	8.46909	8.04845	7.90625	7.82565	7.94609	7.69797	[K].LLGSTK.[RK]	1xPhospho [S4]; 1xTMTpro [K6]; 1xTMTpro [N-Term]	Q6P9K8 [33-38]	Q6P9K8 1xPhospho [S36]	1	____LLGsTK_____	Caskin1
Q6P9K8	AHsLNR.Q6P9K8	7	AHsLNR	0.0171841	6.67499	6.54322	6.81046	6.82518	6.51249	6.95107	7.12401	7.22572	7.45417	7.29041	6.99619	6.49857	7.5859	7.33869	7.38541	7.31981	6.98781	7.08681	7.51396	7.48012	[R].AHSLNR.[Y]	1xPhospho [S3]; 1xTMTpro [N-Term]	Q6P9K8 [882-887]	Q6P9K8 1xPhospho [S884]	1	_____AHsLNR____	Caskin1
Q6PAJ1	ASAPRPPPAPADGADPAPVEESEARPDGEGsPSkGR.Q6PAJ1	6	ASAPRPPPAPADGADPAPVEESEARPDGEGsPSkGR	0.00431458	6.04427	6.09662	5.95743	6.32233	6.20975	5.92428	5.66431	5.69398	5.9471	6.24385	6.16173	6.23236	6.769	6.32544	6.4411	6.39794	6.17507	6.4037	6.46805	6.57824	[R].ASAPRPPPAPADGADPAPVEESEARPDGEGSPSKGR.[S]	1xPhospho [S31]; 1xTMTpro [K34]; 1xTMTpro [N-Term]	Q6PAJ1 [92-127]	Q6PAJ1 1xPhospho [S122]	1	ARPDGEGsPSKGR__	Bcr
Q6PAJ1	SQsTSEQEk.Q6PAJ1	6	SQsTSEQEk	0.00918533	6.29724	6.06333	6.28033	6.41198	6.35427	6.0016	6.15119	5.4876	6.47415	6.17685	6.51987	6.65262	6.42977	6.47168	6.70706	7.00102	6.78758	6.27002	6.7515	6.5137	[R].SQSTSEQEK.[R]	1xPhospho [S3]; 1xTMTpro [K9]; 1xTMTpro [N-Term]	Q6PAJ1 [301-309]	Q6PAJ1 1xPhospho [S303]	1	_____SQsTSEQEK_	Bcr
Q6PAJ1	VSPsPTTYR.Q6PAJ1	3	VSPsPTTYR	0.000108442	6.23484	6.32514	6.40828	6.41512	6.4152	6.37503	6.22745	6.64367	6.62276	6.5378	7.22734	6.71439	7.60165	7.23527	6.71745	7.40497	6.97818	7.21625	7.76908	7.599	[R].VSPSPTTYR.[M]	1xPhospho [S4]; 1xTMTpro [N-Term]	Q6PAJ1 [355-363]	Q6PAJ1 1xPhospho [S358]	1	____VSPsPTTYR__	Bcr
Q6PAR5	kDsDDERSDR.Q6PAR5	2	kDsDDERSDR	0.0424223	4.74922	4.61027	4.78264	4.48661	4.20603	4.35394	5.26932	5.62253	5.30808	4.6477	4.03955	4.00275	4.99437	4.86209	4.88269	4.22533	4.17299	3.50913	4.40341	4.40138	[R].KDSDDERSDR.[S]	1xPhospho [S3]; 1xTMTpro [K1]; 1xTMTpro [N-Term]	Q6PAR5 [962-971]	Q6PAR5 1xPhospho [S964]	1	_____KDsDDERSDR	Gapvd1
Q6PAR5	SRsSDIVSSVR.Q6PAR5	5	SRsSDIVSSVR	7.2e-05	8.42814	8.5255	8.52556	8.59824	8.53007	8.23124	8.08776	7.80986	8.4104	8.68849	8.10362	8.26822	8.22242	8.13084	8.13838	7.58452	7.67401	7.84073	7.67281	7.6721	[R].SRSSDIVSSVR.[R]	1xPhospho [S3]; 1xTMTpro [N-Term]	Q6PAR5 [900-910]	Q6PAR5 1xPhospho [S902]	1	_____SRsSDIVSSV	Gapvd1
Q6PAR5	AVEtPPmSSVNLLEGLSR.Q6PAR5	NA	AVEtPPmSSVNLLEGLSR	0.949364	2.9648	3.05009	3.05631	4.11063	2.76121	2.64211	3.35276	3.18296	3.35209	3.60248	2.92473	3.06616	3.19164	3.10563	3.31444	3.37049	3.03112	2.62173	3.38874	3.10888	[R].AVETPPMSSVNLLEGLSR.[T]	1xPhospho [T4]; 1xOxidation [M7]; 1xTMTpro [N-Term]	Q6PAR5 [387-404]	Q6PAR5 1xPhospho [T390]	1	____AVEtPPMSSVN	Gapvd1
Q6PAR5	GETEERkDsDDERSDR.Q6PAR5	2	GETEERkDsDDERSDR	0.0781493	3.5315	3.00849	4.45406	3.48635	3.33332	3.65465	4.34037	4.61167	3.88046	3.51293	3.29045	2.53423	2.77077	4.19482	3.92654	2.97356	3.31698	2.52264	3.52345	2.50893	[R].GETEERKDSDDERSDR.[S]	1xPhospho [S9]; 1xTMTpro [K7]; 1xTMTpro [N-Term]	Q6PAR5 [956-971]	Q6PAR5 1xPhospho [S964]	1	ETEERKDsDDERSDR	Gapvd1
Q6PB44	REEGEAVEAGDtPEELR.Q6PB44	NA	REEGEAVEAGDtPEELR	0.46177	5.97815	6.08092	6.29023	6.1059	6.41742	5.93246	5.89146	5.92642	6.16822	6.16579	6.09615	5.98214	6.01672	6.29906	6.17192	5.97096	5.91028	6.038	6.23409	6.24428	[R].REEGEAVEAGDTPEELR.[S]	1xPhospho [T12]; 1xTMTpro [N-Term]	Q6PB44 [733-749]	Q6PB44 1xPhospho [T744]	1	EAVEAGDtPEELR__	Ptpn23
Q6PCN3	GVGVPSsPVRAPPDsPTTPVR.Q6PCN3	NA	GVGVPSsPVRAPPDsPTTPVR	0.907623	6.14396	6.10371	6.19523	6.21688	6.15696	6.13494	5.95409	5.92313	6.29443	6.30967	5.98821	6.01828	6.38003	6.14238	6.22503	5.90047	5.96628	6.09467	6.26674	6.25857	[R].GVGVPSSPVRAPPDSPTTPVR.[S]	2xPhospho [S7; S15]; 1xTMTpro [N-Term]	Q6PCN3 [427-447]	Q6PCN3 2xPhospho [S433; S441]	2	_GVGVPSsPVRAPPD	Ttbk1
Q6PCN3	TLVLVsPGDmk.Q6PCN3	NA	TLVLVsPGDmk	0.995535	4.66217	3.98561	4.73798	4.42809	4.35359	4.30241	4.23237	4.38394	4.65862	4.54423	4.32172	4.43439	4.66601	4.49857	4.3535	4.42135	4.50721	4.19058	4.59871	4.51731	[K].TLVLVSPGDMK.[K]	1xPhospho [S6]; 1xOxidation [M10]; 1xTMTpro [K11]; 1xTMTpro [N-Term]	Q6PCN3 [829-839]	Q6PCN3 1xPhospho [S834]	1	__TLVLVsPGDMK__	Ttbk1
Q6PCN3	APPDsPTTPVR.Q6PCN3	1	APPDsPTTPVR	0.0028687	4.05225	4.5414	4.67412	4.69527	4.33837	4.07299	4.15914	4.06577	4.26709	4.29148	3.67184	3.77126	3.82006	3.89873	4.06029	3.74862	3.70383	4.25564	4.19417	4.02059	[R].APPDSPTTPVR.[S]	1xPhospho [S5]; 1xTMTpro [N-Term]	Q6PCN3 [437-447]	Q6PCN3 1xPhospho [S441]	1	___APPDsPTTPVR_	Ttbk1
Q6PCN3	kGTTIsPSR.Q6PCN3	5	kGTTIsPSR	0.0882414	6.18784	6.30587	6.33211	6.35259	6.14066	5.99928	6.11812	6.03824	6.41526	6.38401	5.80542	6.18533	6.33556	6.20523	6.16319	5.52516	5.82646	5.95866	5.85407	6.33941	[K].KGTTISPSR.[H]	1xPhospho [S6]; 1xTMTpro [K1]; 1xTMTpro [N-Term]	Q6PCN3 [1029-1037]	Q6PCN3 1xPhospho [S1034]	1	__KGTTIsPSR____	Ttbk1
Q6PCN3	mDLPGsPSR.Q6PCN3	5	mDLPGsPSR	0.00875623	6.22391	6.24608	6.41492	6.52897	6.39386	6.00431	6.17644	6.22007	6.18776	6.29906	5.91643	5.98742	6.23595	6.26435	6.23197	5.69612	5.87076	5.95463	5.98411	6.23263	[R].MDLPGSPSR.[Q]	1xPhospho [S6]; 1xOxidation [M1]; 1xTMTpro [N-Term]	Q6PCN3 [479-487]	Q6PCN3 1xPhospho [S484]	1	__MDLPGsPSR____	Ttbk1
Q6PCN3	RVNsPESER.Q6PCN3	8	RVNsPESER	0.000794026	5.28089	5.3012	5.4559	5.67914	5.44365	5.99366	5.92381	5.79019	6.17913	6.42665	5.83794	5.88545	6.17459	6.28984	6.3868	5.91809	5.87866	5.92157	6.02168	6.30033	[R].RVNSPESER.[L]	1xPhospho [S4]; 1xTMTpro [N-Term]	Q6PCN3 [453-461]	Q6PCN3 1xPhospho [S456]	1	____RVNsPESER__	Ttbk1
Q6PCP5	ERsmSENAVR.Q6PCP5	1	ERsmSENAVR	0.0013436	5.87307	5.98603	6.25669	6.48454	6.48089	5.76816	5.45802	4.98293	5.68584	5.76193	5.36069	5.22112	5.78141	5.55844	5.3974	5.36843	5.13999	5.29767	5.777	5.24178	[R].ERSMSENAVR.[Q]	1xPhospho [S3]; 1xOxidation [M4]; 1xTMTpro [N-Term]	Q6PCP5 [127-136]	Q6PCP5 1xPhospho [S129]	1	_____ERsMSENAVR	Mff
Q6PD03	SQGsSQFR.Q6PD03	2	SQGsSQFR	0.0150436	6.18093	6.09407	6.34933	6.0687	6.1787	6.76672	6.65885	6.27226	6.93622	6.94036	6.77661	6.20624	6.82473	6.74674	6.16472	5.95688	5.74933	5.94875	6.58541	6.3397	[R].SQGSSQFR.[S]	1xPhospho [S4]; 1xTMTpro [N-Term]	Q6PD03 [38-45]	Q6PD03 1xPhospho [S41]	1	____SQGsSQFR___	Ppp2r5a
Q6PD10	ASLsFETSESSQEAk.Q6PD10	5	ASLsFETSESSQEAk	0.032629	5.51791	5.62506	5.747	5.39101	5.83341	5.52341	5.56318	5.49402	5.87719	5.70051	5.09953	5.0851	5.35595	5.6501	5.50862	5.15303	5.22362	5.20009	5.61607	5.29275	[K].ASLSFETSESSQEAK.[S]	1xPhospho [S4]; 1xTMTpro [K15]; 1xTMTpro [N-Term]	Q6PD10 [136-150]	Q6PD10 1xPhospho [S139]	1	____ASLsFETSESS	Ip6k1
Q6PDH0	SsPPPLPAk.Q6PDH0	2	SsPPPLPAk	0.000124686	5.57182	5.56648	5.98224	5.65347	5.58703	6.21914	6.4258	6.40191	6.42076	6.6951	6.01031	5.30472	6.29339	6.11028	5.92882	5.48514	5.43294	5.34865	5.323	5.60846	[R].SSPPPLPAK.[A]	1xPhospho [S2]; 1xTMTpro [K9]; 1xTMTpro [N-Term]	Q6PDH0 [950-958]	Q6PDH0 1xPhospho [S951]	1	______SsPPPLPAK	Phldb1
Q6PDH0	kLsSGDLR.Q6PDH0	5	kLsSGDLR	6.99e-06	8.0834	7.79899	7.90733	7.75804	7.69081	8.12293	8.74183	8.19623	8.43693	8.0699	6.97166	6.72237	7.81534	7.27367	7.28423	6.89269	6.76769	6.52629	6.98882	6.8512	[R].KLSSGDLR.[V]	1xPhospho [S3]; 1xTMTpro [K1]; 1xTMTpro [N-Term]	Q6PDH0 [563-570]	Q6PDH0 1xPhospho [S565]	1	_____KLsSGDLR__	Phldb1
Q6PDL0	EFQDYIEPEEGcQGsPQR.Q6PDL0	1	EFQDYIEPEEGcQGsPQR	0.00145526	6.61738	6.62504	6.33688	6.31038	6.87387	6.21951	5.87378	5.61822	6.04873	6.22905	5.73149	5.63183	5.97043	5.99468	6.23232	5.96902	5.81909	5.86033	5.98418	6.04293	[K].EFQDYIEPEEGCQGSPQR.[R]	1xCarbamidomethyl [C12]; 1xPhospho [S15]; 1xTMTpro [N-Term]	Q6PDL0 [180-197]	Q6PDL0 1xPhospho [S194]	1	PEEGCQGsPQR____	Dync1li2
Q6PDQ2	mSQPGsPSPk.Q6PDQ2	6	mSQPGsPSPk	9.23e-05	5.37679	5.51215	5.72556	5.99407	5.71638	4.96661	4.92855	4.88024	5.21667	5.41342	5.54806	5.66101	5.60887	5.72173	5.97184	5.93646	5.90429	5.86067	5.84605	5.87648	[K].MSQPGSPSPK.[T]	1xPhospho [S6]; 1xOxidation [M1]; 1xTMTpro [K10]; 1xTMTpro [N-Term]	Q6PDQ2 [1523-1532]	Q6PDQ2 1xPhospho [S1528]	1	__MSQPGsPSPK___	Chd4
Q6PDS3	EmLHsPLPcTGGk.Q6PDS3	5	EmLHsPLPcTGGk	0.00360619	6.5609	6.61523	6.64855	6.61091	6.78955	6.54389	6.35107	6.16564	6.51661	6.70493	6.2741	6.40199	6.5513	6.56727	6.53185	6.10947	6.08988	6.29152	6.15882	6.38485	[R].EMLHSPLPCTGGK.[L]	1xCarbamidomethyl [C9]; 1xPhospho [S5]; 1xOxidation [M2]; 1xTMTpro [K13]; 1xTMTpro [N-Term]	Q6PDS3 [544-556]	Q6PDS3 1xPhospho [S548]	1	___EMLHsPLPCTGG	Sarm1
Q6PER3	TsPTGPk.Q6PER3	7	TsPTGPk	0.00414742	8.00411	7.54727	7.79647	7.70759	7.04324	8.30206	9.2224	9.83166	9.10262	8.56441	8.6286	7.99581	9.21614	9.25932	9.61406	8.7966	8.63014	8.01757	9.20898	8.85361	[R].TSPTGPK.[N]	1xPhospho [S2]; 1xTMTpro [K7]; 1xTMTpro [N-Term]	Q6PER3 [161-167]	Q6PER3 1xPhospho [S162]	1	______TsPTGPK__	Mapre3
Q6PFD5	RDsWmER.Q6PFD5	NA	RDsWmER	0.372577	3.85518	4.9845	5.09704	5.18051	4.88998	4.69349	4.66307	4.34688	4.4937	4.45464	4.71162	4.62539	5.27515	5.26247	4.70797	4.74332	4.75799	4.55747	5.04997	5.04817	[R].RDSWMER.[G]	1xPhospho [S3]; 1xOxidation [M5]; 1xTMTpro [N-Term]	Q6PFD5 [769-775]	Q6PFD5 1xPhospho [S771]	1	_____RDsWMER___	Dlgap3
Q6PFD5	HSSATESADsIEIYIPEAQTR.Q6PFD5	5	HSSATESADsIEIYIPEAQTR	0.0730926	5.72644	5.79275	5.84391	5.80804	6.09313	5.6495	5.64489	5.58811	5.93758	5.86827	5.54321	5.56772	5.74514	5.47345	6.03726	5.39748	5.37438	5.32297	5.74193	5.69854	[R].HSSATESADSIEIYIPEAQTR.[L]	1xPhospho [S10]; 1xTMTpro [N-Term]	Q6PFD5 [956-976]	Q6PFD5 1xPhospho [S965]	1	SATESADsIEIYIPE	Dlgap3
Q6PFD5	sLPDSGR.Q6PFD5	4	sLPDSGR	0.000686479	5.46076	5.52651	5.89124	6.1729	5.88711	5.77546	6.38532	7.03573	6.62134	6.42053	6.39311	6.58409	7.17643	6.87505	7.54502	7.31589	7.07877	6.67607	7.50137	7.13873	[R].SLPDSGR.[T]	1xPhospho [S1]; 1xTMTpro [N-Term]	Q6PFD5 [779-785]	Q6PFD5 1xPhospho [S779]	1	_______sLPDSGR_	Dlgap3
Q6PFD5	RSSsVDTAR.Q6PFD5	8	RSSsVDTAR	0.000820287	4.88818	5.4911	5.55499	5.50527	5.71481	5.45411	5.19445	4.93671	5.72971	5.82533	6.10444	6.49011	6.30414	6.164	6.31433	5.67576	5.59956	5.79913	5.79327	5.97929	[R].RSSSVDTAR.[I]	1xPhospho [S4]; 1xTMTpro [N-Term]	Q6PFD5 [426-434]	Q6PFD5 1xPhospho [S429]	1	____RSSsVDTAR__	Dlgap3
Q6PFD5	HAsEPQPGPR.Q6PFD5	6	HAsEPQPGPR	0.0314708	5.12635	5.1025	4.93375	5.59599	5.44296	4.70951	4.52798	3.86597	4.18388	4.48602	4.83148	4.98171	4.36609	6.30475	4.87434	4.37188	4.60344	4.44843	4.56242	5.04928	[R].HASEPQPGPR.[A]	1xPhospho [S3]; 1xTMTpro [N-Term]	Q6PFD5 [710-719]	Q6PFD5 1xPhospho [S712]	1	_____HAsEPQPGPR	Dlgap3
Q6PFD5	SHsLEAPGkR.Q6PFD5	3	SHsLEAPGkR	4.15e-06	6.02003	5.91231	6.04672	6.21768	5.88259	6.47488	6.70952	6.97379	7.03747	7.08625	7.32001	7.25532	7.93208	7.94307	7.60185	7.39578	7.07285	7.01623	7.78156	7.63944	[K].SHSLEAPGKR.[D]	1xPhospho [S3]; 1xTMTpro [K9]; 1xTMTpro [N-Term]	Q6PFD5 [183-192]	Q6PFD5 1xPhospho [S185]	1	_____SHsLEAPGKR	Dlgap3
Q6PFD5	AGLGHLsPEGPLSLSEGPSSVGPEGGPGGVGAGGGSSTFPR.Q6PFD5	NA	AGLGHLsPEGPLSLSEGPSSVGPEGGPGGVGAGGGSSTFPR	0.812195	3.2667	2.9203	3.59426	3.57057	3.95811	3.24947	3.73205	3.69059	3.71451	3.4591	3.4788	2.7415	3.47709	3.68956	3.91555	3.06823	3.26305	3.23218	3.69667	3.51223	[R].AGLGHLSPEGPLSLSEGPSSVGPEGGPGGVGAGGGSSTFPR.[M]	1xPhospho [S7]; 1xTMTpro [N-Term]	Q6PFD5 [52-92]	Q6PFD5 1xPhospho [S58]	1	_AGLGHLsPEGPLSL	Dlgap3
Q6PFD5	ERsLDSVDR.Q6PFD5	4	ERsLDSVDR	0.000795175	5.75797	5.60687	5.63422	5.79466	5.37052	6.16698	6.59326	7.40014	6.66054	6.36333	6.57915	6.15524	7.66015	7.57472	7.4379	6.96889	7.03159	6.65341	7.58154	7.39313	[K].ERSLDSVDR.[Q]	1xPhospho [S3]; 1xTMTpro [N-Term]	Q6PFD5 [928-936]	Q6PFD5 1xPhospho [S930]	1	_____ERsLDSVDR_	Dlgap3
Q6PFD5	SSsVDTAR.Q6PFD5	8	SSsVDTAR	3.62e-05	5.76158	5.83902	5.84728	5.87775	5.91491	6.1081	6.07963	5.91204	6.47469	6.49712	6.57814	6.66076	7.25117	6.82502	7.12412	6.24478	6.3752	6.43581	6.49689	6.60601	[R].SSSVDTAR.[I]	1xPhospho [S3]; 1xTMTpro [N-Term]	Q6PFD5 [427-434]	Q6PFD5 1xPhospho [S429]	1	_____SSsVDTAR__	Dlgap3
Q6PFD5	SEsPSRIR.Q6PFD5	6	SEsPSRIR	0.000867182	6.16706	6.58859	6.85151	7.1719	7.12529	6.92305	5.91793	5.90567	6.38782	7.423	7.93723	7.91127	8.03576	7.96026	7.27424	7.48315	7.60374	8.05251	7.57363	8.27587	[R].SESPSRIR.[H]	1xPhospho [S3]; 1xTMTpro [N-Term]	Q6PFD5 [163-170]	Q6PFD5 1xPhospho [S165]	1	_____SEsPSRIR__	Dlgap3
Q6PGN3	sIELEHFEER.Q6PGN3	NA	sIELEHFEER	0.119172	5.03968	4.92147	4.99796	5.08129	4.90065	4.37165	4.52917	4.4704	5.11827	5.10351	4.37547	4.5363	4.9956	4.66936	4.46548	4.68967	4.52858	4.6352	4.71831	4.91103	[R].SIELEHFEER.[D]	1xPhospho [S1]; 1xTMTpro [N-Term]	Q6PGN3 [6-15]	Q6PGN3 1xPhospho [S6]	1	_______sIELEHFE	Dclk2
Q6PGN3	YSGSRsPGFSR.Q6PGN3	1	YSGSRsPGFSR	7.43e-08	7.33254	7.07728	6.92419	7.33136	7.15411	6.24118	6.21799	6.09518	6.1427	6.25584	5.78489	5.53039	5.79787	5.83637	5.69866	5.34401	5.12493	5.61638	5.71048	5.92338	[K].YSGSRSPGFSR.[R]	1xPhospho [S6]; 1xTMTpro [N-Term]	Q6PGN3 [302-312]	Q6PGN3 1xPhospho [S307]	1	__YSGSRsPGFSR__	Dclk2
Q6PH08	IAsLER.Q6PH08	3	IAsLER	3.19e-09	5.05707	5.25441	5.56959	5.4648	5.42588	5.8471	5.66142	6.06284	5.84108	6.22859	6.99128	7.04828	6.8593	7.25253	7.39057	7.66198	7.64418	7.70678	7.78055	7.84556	[K].IASLER.[EN]	1xPhospho [S3]; 1xTMTpro [N-Term]	Q6PH08 [387-392]	Q6PH08 1xPhospho [S389]	1	_____IAsLER____	Erc2
Q6PH08	RTSsGGGGGTGk.Q6PH08	3	RTSsGGGGGTGk	2.72e-05	5.88891	6.18335	5.93212	5.28663	5.22502	6.6888	6.80947	6.51938	6.36478	6.79288	7.04391	7.0911	7.6036	7.92486	7.89146	7.71092	7.38742	7.36801	8.78837	8.67825	[R].RTSSGGGGGTGK.[T]	1xPhospho [S4]; 1xTMTpro [K12]; 1xTMTpro [N-Term]	Q6PH08 [31-42]	Q6PH08 1xPhospho [S34]	1	____RTSsGGGGGTG	Erc2
Q6PIC6	kDDkSsPk.Q6PIC6	4	kDDkSsPk	0.00551667	6.38176	6.20555	6.39332	5.55018	5.58452	6.68436	7.99284	8.64067	7.49812	7.03375	6.92257	6.58713	8.55571	8.2005	8.60916	8.17868	7.50891	6.92196	8.59681	8.41701	[K].KDDKSSPK.[K]	1xPhospho [S6]; 3xTMTpro [K1; K4; K8]; 1xTMTpro [N-Term]	Q6PIC6 [5-12]	Q6PIC6 1xPhospho [S10]	1	__KDDKSsPK_____	Atp1a3
Q6PNC0	ILsPFSQk.Q6PNC0	7	ILsPFSQk	0.0376284	4.88965	4.85954	5.29463	5.39816	5.30832	5.42653	5.64096	6.10768	5.62826	5.47433	5.08598	4.78805	5.38572	5.48234	5.43497	5.39785	5.37773	4.98525	5.25864	5.32173	[K].ILSPFSQK.[F]	1xPhospho [S3]; 1xTMTpro [K8]; 1xTMTpro [N-Term]	Q6PNC0 [920-927]	Q6PNC0 1xPhospho [S922]	1	_____ILsPFSQK__	Dmxl1
Q6RHR9	kDsQNSSQHSVSSHR.Q6RHR9	8	kDsQNSSQHSVSSHR	0.00494248	5.88586	5.97245	5.95364	5.92412	5.8979	6.07711	6.14911	5.81498	6.12647	6.4575	6.20047	6.53422	6.3974	6.33112	6.91426	6.2664	6.06205	6.10817	6.17997	5.94344	[R].KDSQNSSQHSVSSHR.[S]	1xPhospho [S3]; 1xTMTpro [K1]; 1xTMTpro [N-Term]	Q6RHR9 [731-745]	Q6RHR9 1xPhospho [S733]	1	_____KDsQNSSQHS	Magi1
Q6VNB8	LLEEGAVSVDSVsPTLR.Q6VNB8	6	LLEEGAVSVDSVsPTLR	0.0054405	3.54454	3.44696	4.21354	4.01632	3.61887	3.17812	3.34096	3.63716	3.0164	3.46833	3.01728	2.99207	3.468	3.36342	3.59893	3.70737	3.84901	3.87389	3.93773	4.05752	[R].LLEEGAVSVDSVSPTLR.[H]	1xPhospho [S13]; 1xTMTpro [N-Term]	Q6VNB8 [747-763]	Q6VNB8 1xPhospho [S759]	1	AVSVDSVsPTLR___	Wdfy3
Q6VNB8	LkISsPVR.Q6VNB8	7	LkISsPVR	0.0225891	6.6465	6.49266	6.66431	6.51705	6.61422	6.90885	7.21018	7.25905	7.05875	7.09183	6.82675	6.3143	7.20464	6.9743	7.01582	6.73224	6.65155	6.39185	6.98714	6.97882	[R].LKISSPVR.[V]	1xPhospho [S5]; 1xTMTpro [K2]; 1xTMTpro [N-Term]	Q6VNB8 [3479-3486]	Q6VNB8 1xPhospho [S3483]	1	___LKISsPVR____	Wdfy3
Q6Y685	SHPPANFFGSGPILQNsPPLSSk.Q6Y685	NA	SHPPANFFGSGPILQNsPPLSSk	0.25729	4.1123	4.11732	4.34719	3.91531	4.21728	3.75112	3.87049	3.74961	4.12981	4.30707	3.9407	4.65818	4.15803	4.02451	4.26504	3.87863	3.83509	3.85128	4.25321	4.01059	[R].SHPPANFFGSGPILQNSPPLSSK.[C]	1xPhospho [S17]; 1xTMTpro [K23]; 1xTMTpro [N-Term]	Q6Y685 [385-407]	Q6Y685 1xPhospho [S401]	1	SGPILQNsPPLSSK_	Tacc1
Q6Y7W8	SQsWEERGDR.Q6Y7W8	NA	SQsWEERGDR	0.141201	4.3157	4.18521	4.53383	5.06099	4.28905	4.1593	4.0119	4.13384	4.29618	4.24216	4.18059	4.27894	4.48794	4.6064	4.20773	4.00275	3.66908	4.38236	4.36019	4.09759	[R].SQSWEERGDR.[R]	1xPhospho [S3]; 1xTMTpro [N-Term]	Q6Y7W8 [159-168]	Q6Y7W8 1xPhospho [S161]	1	_____SQsWEERGDR	Gigyf2
Q6ZPE2	LGLGTLSSsLSR.Q6ZPE2	6	LGLGTLSSsLSR	0.220033	3.93083	3.88432	4.2019	4.45117	4.50942	3.69565	3.52665	3.34977	4.24488	4.34508	4.55927	3.92464	3.99272	4.02744	4.19322	4.176	4.76185	3.92845	4.38683	4.19381	[R].LGLGTLSSSLSR.[A]	1xPhospho [S9]; 1xTMTpro [N-Term]	Q6ZPE2 [1133-1144]	Q6ZPE2 1xPhospho [S1141]	1	GLGTLSSsLSR____	Sbf1
Q6ZPF3	ESDILsDEDEDFHHPLk.Q6ZPF3	6	ESDILsDEDEDFHHPLk	0.0855604	6.39269	6.04382	6.47275	6.33745	6.27442	5.91767	5.70603	6.18288	6.07779	6.15927	5.70758	6.21633	6.44915	6.25355	6.46118	6.48919	6.41829	6.21763	6.31312	6.41744	[K].ESDILSDEDEDFHHPLK.[Q]	1xPhospho [S6]; 1xTMTpro [K17]; 1xTMTpro [N-Term]	Q6ZPF3 [1585-1601]	Q6ZPF3 1xPhospho [S1590]	1	__ESDILsDEDEDFH	Tiam2
Q6ZPF3	QGsPTkDIEIQFQR.Q6ZPF3	NA	QGsPTkDIEIQFQR	0.926232	7.34856	7.40142	8.00973	7.72969	7.95323	7.3838	7.42258	7.99828	8.12181	8.15668	7.62556	7.6646	7.07278	8.98559	7.21625	7.69149	8.01916	7.74785	7.23668	7.33192	[K].QGSPTKDIEIQFQR.[L]	1xPhospho [S3]; 1xTMTpro [K6]; 1xTMTpro [N-Term]	Q6ZPF3 [1602-1615]	Q6ZPF3 1xPhospho [S1604]	1	_____QGsPTKDIEI	Tiam2
Q6ZPF3	HLsDADR.Q6ZPF3	3	HLsDADR	3.28e-05	4.37443	4.66311	4.28823	4.96689	5.11342	4.60101	4.70166	5.32299	4.59869	4.35846	5.47118	5.75908	6.49274	6.33542	6.71549	6.06697	5.84985	5.72073	6.21604	6.14003	[R].HLSDADR.[L]	1xPhospho [S3]; 1xTMTpro [N-Term]	Q6ZPF3 [1114-1120]	Q6ZPF3 1xPhospho [S1116]	1	_____HLsDADR___	Tiam2
Q6ZPF3	HLsDADRLR.Q6ZPF3	3	HLsDADRLR	4.49e-08	4.8703	4.60311	5.05243	4.94068	4.96397	5.05762	4.94667	5.49303	5.08683	5.26137	6.30008	6.54912	6.7891	6.90232	7.23479	6.47478	6.43549	6.54445	6.54742	6.91514	[R].HLSDADRLR.[K]	1xPhospho [S3]; 1xTMTpro [N-Term]	Q6ZPF3 [1114-1122]	Q6ZPF3 1xPhospho [S1116]	1	_____HLsDADRLR_	Tiam2
Q6ZPJ0	SLsTDTSRQESDTVSYkPPDSk.Q6ZPJ0	3	SLsTDTSRQESDTVSYkPPDSk	0.000619423	6.32965	6.36981	6.75005	6.79968	6.60372	6.9815	6.71292	6.76954	7.48789	7.30202	7.15451	7.80612	7.59103	7.27172	7.64783	7.19731	7.34154	7.16496	7.26305	7.05137	[K].SLSTDTSRQESDTVSYKPPDSK.[L]	1xPhospho [S3]; 2xTMTpro [K17; K22]; 1xTMTpro [N-Term]	Q6ZPJ0 [219-240]	Q6ZPJ0 1xPhospho [S221]	1	_____SLsTDTSRQE	Tex2
Q6ZPJ3	EEkPEVQsPVk.Q6ZPJ3	1	EEkPEVQsPVk	0.00150131	7.77428	7.49803	8.13501	8.04379	7.79647	7.40455	7.44406	7.66138	7.73185	7.71495	7.22494	7.78148	7.58245	7.39487	7.5731	7.30154	7.32392	7.0494	7.06281	7.2197	[K].EEKPEVQSPVK.[A]	1xPhospho [S8]; 2xTMTpro [K3; K11]; 1xTMTpro [N-Term]	Q6ZPJ3 [886-896]	Q6ZPJ3 1xPhospho [S893]	1	EEKPEVQsPVK____	Ube2o
Q6ZPQ6	HLSRsNIDIPR.Q6ZPQ6	5	HLSRsNIDIPR	5.41e-05	6.66206	6.92432	6.9404	7.02714	7.17931	6.7113	6.3556	6.14742	6.78059	6.66151	6.20739	5.84528	6.24699	6.3511	6.20995	5.92799	6.04893	6.01531	6.00218	6.27019	[R].HLSRSNIDIPR.[S]	1xPhospho [S5]; 1xTMTpro [N-Term]	Q6ZPQ6 [626-636]	Q6ZPQ6 1xPhospho [S630]	1	___HLSRsNIDIPR_	Pitpnm2
Q6ZQ08	TAsPQQR.Q6ZQ08	3	TAsPQQR	0.00283943	4.13225	4.1935	4.25899	4.85289	4.62351	4.18369	4.2226	4.68924	4.52937	4.39093	4.96541	4.41968	5.06423	5.50804	4.98372	4.96592	4.95387	5.06871	5.10043	5.33214	[R].TASPQQR.[E]	1xPhospho [S3]; 1xTMTpro [N-Term]	Q6ZQ08 [1478-1484]	Q6ZQ08 1xPhospho [S1480]	1	_____TAsPQQR___	Cnot1
Q6ZQ18	NsPEkEER.Q6ZQ18	4	NsPEkEER	0.00215568	4.27514	4.36491	4.16969	5.41675	3.65366	3.85827	4.81696	5.76843	5.21367	4.74998	4.86419	5.24749	5.72469	5.66081	6.13177	6.35484	6.12817	5.54071	6.21087	6.26729	[R].NSPEKEER.[V]	1xPhospho [S2]; 1xTMTpro [K5]; 1xTMTpro [N-Term]	Q6ZQ18 [708-715]	Q6ZQ18 1xPhospho [S709]	1	______NsPEKEER_	Efr3b
Q6ZQ29	TAsLVSR.Q6ZQ29	1	TAsLVSR	0.000124686	7.68377	7.76599	7.67276	7.89682	7.92881	7.11385	7.06161	6.25945	7.16835	7.10605	7.20311	6.99848	6.8598	7.01773	7.17035	6.88901	7.00229	6.78803	7.11362	6.96115	[R].TASLVSR.[Q]	1xPhospho [S3]; 1xTMTpro [N-Term]	Q6ZQ29 [478-484]	Q6ZQ29 1xPhospho [S480]	1	_____TAsLVSR___	Taok2
Q6ZQ58	ESPRPPAAAEAPAGsDGEDGGRR.Q6ZQ58	2	ESPRPPAAAEAPAGsDGEDGGRR	0.0142342	3.0832	3.29973	3.44822	3.31257	2.98961	3.38103	4.26186	4.22018	3.79559	3.76778	2.57718	2.10486	3.02316	3.70135	3.28843	3.20179	3.33109	2.96318	3.43272	3.2807	[R].ESPRPPAAAEAPAGSDGEDGGRR.[D]	1xPhospho [S15]; 1xTMTpro [N-Term]	Q6ZQ58 [67-89]	Q6ZQ58 1xPhospho [S81]	1	AAEAPAGsDGEDGGR	Larp1
Q6ZQ58	ESPRPPAAAEAPAGsDGEDGGRRDFVEAPPPk.Q6ZQ58	5	ESPRPPAAAEAPAGsDGEDGGRRDFVEAPPPk	0.00396479	6.61012	6.43514	6.63515	6.65702	6.40411	6.45241	6.4038	6.05054	6.16712	6.68217	5.92389	5.82292	6.17152	6.08695	6.01463	6.11558	5.87798	5.91458	6.27489	6.437	[R].ESPRPPAAAEAPAGSDGEDGGRRDFVEAPPPK.[V]	1xPhospho [S15]; 1xTMTpro [K32]; 1xTMTpro [N-Term]	Q6ZQ58 [67-98]	Q6ZQ58 1xPhospho [S81]	1	AAEAPAGsDGEDGGR	Larp1
Q6ZWR6	TLPsEDEEGEEDkEFYLR.Q6ZWR6	6	TLPsEDEEGEEDkEFYLR	0.129035	6.55877	6.69691	6.75692	6.78024	6.93283	6.6841	6.57345	6.67805	6.71379	6.71505	6.53447	6.58929	6.66183	6.66677	6.84652	6.68223	6.80666	6.72532	6.96381	7.04425	[R].TLPSEDEEGEEDKEFYLR.[G]	1xPhospho [S4]; 1xTMTpro [K13]; 1xTMTpro [N-Term]	Q6ZWR6 [8305-8322]	Q6ZWR6 1xPhospho [S8308]	1	____TLPsEDEEGEE	Syne1
Q76LS9	APsPQGR.Q76LS9	2	APsPQGR	3.62e-05	7.2891	7.48777	7.47541	7.48208	7.48211	7.5503	7.51178	7.27499	7.72898	7.67387	7.20751	7.41812	7.46787	7.53111	7.637	6.92332	6.90029	7.01957	6.99557	6.91386	[R].APSPQGR.[G]	1xPhospho [S3]; 1xTMTpro [N-Term]	Q76LS9 [438-444]	Q76LS9 1xPhospho [S440]	1	_____APsPQGR___	Mindy1
Q76LS9	SHGAEGGGGsPEk.Q76LS9	2	SHGAEGGGGsPEk	0.150393	4.9584	4.76498	5.18292	5.2047	5.06113	4.88809	5.49977	5.86036	5.66998	5.14917	4.84657	4.80868	4.99515	5.35185	5.55542	4.97695	4.94476	5.00545	5.12281	5.06936	[K].SHGAEGGGGSPEK.[Q]	1xPhospho [S10]; 1xTMTpro [K13]; 1xTMTpro [N-Term]	Q76LS9 [373-385]	Q76LS9 1xPhospho [S382]	1	GAEGGGGsPEK____	Mindy1
Q76LS9	VETAEVcSRPQELPQsPR.Q76LS9	4	VETAEVcSRPQELPQsPR	0.0321999	6.21086	6.19816	6.40262	6.35186	6.41805	6.34439	6.4792	6.73134	6.52454	6.59896	6.44769	6.32668	6.91415	6.7942	6.94405	6.53255	6.66529	6.56512	6.52646	6.71548	[K].VETAEVCSRPQELPQSPR.[I]	1xCarbamidomethyl [C7]; 1xPhospho [S16]; 1xTMTpro [N-Term]	Q76LS9 [88-105]	Q76LS9 1xPhospho [S103]	1	RPQELPQsPR_____	Mindy1
Q76LS9	TRAPsPQGR.Q76LS9	8	TRAPsPQGR	0.0444955	5.15552	5.46539	5.56815	5.57689	4.9169	5.34831	5.21992	5.22344	5.40505	5.43832	5.53849	5.35345	5.49953	6.18617	5.06732	4.79006	4.98939	5.1472	4.90058	5.05091	[R].TRAPSPQGR.[G]	1xPhospho [S5]; 1xTMTpro [N-Term]	Q76LS9 [436-444]	Q76LS9 1xPhospho [S440]	1	___TRAPsPQGR___	Mindy1
Q7TME0	SNsPENTR.Q7TME0	2	SNsPENTR	0.0573526	5.15975	5.07618	5.51639	5.31261	4.83765	5.92679	6.37696	6.52193	6.1642	5.94585	6.01666	3.80751	6.33868	6.11488	4.85171	5.10212	4.67653	4.63804	5.59662	5.38622	[R].SNSPENTR.[N]	1xPhospho [S3]; 1xTMTpro [N-Term]	Q7TME0 [744-751]	Q7TME0 1xPhospho [S746]	1	_____SNsPENTR__	Plppr4
Q7TME0	NASIHAsmDSAR.Q7TME0	5	NASIHAsmDSAR	0.000482941	3.64261	4.16789	4.4254	3.46998	3.91004	3.18832	3.0045	2.76496	3.46754	3.43988	3.3644	2.90273	3.3456	3.38908	2.95698	2.21061	2.86269	2.57312	3.07619	2.73258	[R].NASIHASMDSAR.[S]	1xPhospho [S7]; 1xOxidation [M8]; 1xTMTpro [N-Term]	Q7TME0 [433-444]	Q7TME0 1xPhospho [S439]	1	_NASIHAsMDSAR__	Plppr4
Q7TME0	DASsLTNLkR.Q7TME0	2	DASsLTNLkR	7.48e-05	7.25864	7.30971	7.33613	7.24789	7.11622	7.23323	7.36729	7.47001	7.52402	7.27654	7.16861	6.31756	7.21486	7.24992	6.61712	6.27712	5.9649	6.19332	6.60584	6.367	[R].DASSLTNLKR.[A]	1xPhospho [S4]; 1xTMTpro [K9]; 1xTMTpro [N-Term]	Q7TME0 [383-392]	Q7TME0 1xPhospho [S386]	1	____DASsLTNLKR_	Plppr4
Q7TME0	ANADVEIITPRsPmGk.Q7TME0	2	ANADVEIITPRsPmGk	0.0517684	6.88503	6.71293	6.67406	6.7809	7.01814	7.21553	7.12708	7.19966	7.21709	7.33184	7.09142	6.14854	7.3006	7.01457	6.2132	6.25389	6.30053	6.25119	6.84616	7.04424	[R].ANADVEIITPRSPMGK.[E]	1xPhospho [S12]; 1xOxidation [M14]; 1xTMTpro [K16]; 1xTMTpro [N-Term]	Q7TME0 [393-408]	Q7TME0 1xPhospho [S404]	1	VEIITPRsPMGK___	Plppr4
Q7TME0	DALRsLTDLNQDPSR.Q7TME0	2	DALRsLTDLNQDPSR	0.00470273	6.6898	6.79476	6.99424	6.99129	6.70792	6.97019	7.02597	6.98553	7.21299	7.19419	6.80733	6.30472	7.14987	6.84734	6.99118	6.48156	6.38649	6.39356	6.6833	6.54831	[R].DALRSLTDLNQDPSR.[V]	1xPhospho [S5]; 1xTMTpro [N-Term]	Q7TME0 [343-357]	Q7TME0 1xPhospho [S347]	1	___DALRsLTDLNQD	Plppr4
Q7TME0	TVHTsPGGGLGAR.Q7TME0	NA	TVHTsPGGGLGAR	0.522317	4.79857	4.77224	4.9553	5.3601	5.33498	4.87636	4.58204	5.02797	4.73135	4.91088	5.25455	4.61027	5.40309	5.2028	4.65389	4.75924	4.28421	4.15124	5.19074	5.3404	[R].TVHTSPGGGLGAR.[Q]	1xPhospho [S5]; 1xTMTpro [N-Term]	Q7TME0 [33-45]	Q7TME0 1xPhospho [S37]	1	___TVHTsPGGGLGA	Plppr4
Q7TMY8	AQcETLsPDGLPEEQPQTTk.Q7TMY8	2	AQcETLsPDGLPEEQPQTTk	0.00102378	6.69754	6.8795	6.61856	6.91972	6.87319	7.01992	6.93937	7.02204	7.12841	7.26653	7.00808	7.06985	7.06714	7.26878	7.2949	6.72788	6.73746	6.68419	6.76483	6.98426	[R].AQCETLSPDGLPEEQPQTTK.[L]	1xCarbamidomethyl [C3]; 1xPhospho [S7]; 1xTMTpro [K20]; 1xTMTpro [N-Term]	Q7TMY8 [3657-3676]	Q7TMY8 1xPhospho [S3663]	1	_AQCETLsPDGLPEE	Huwe1
Q7TMY8	RAQcETLsPDGLPEEQPQTTk.Q7TMY8	6	RAQcETLsPDGLPEEQPQTTk	0.103375	6.20244	6.08099	6.20056	6.25444	6.3114	5.94476	5.87878	5.83621	6.0874	6.26629	6.21253	6.30414	6.14688	6.2171	6.31352	5.95195	6.1037	6.05617	6.17528	6.48194	[R].RAQCETLSPDGLPEEQPQTTK.[L]	1xCarbamidomethyl [C4]; 1xPhospho [S8]; 1xTMTpro [K21]; 1xTMTpro [N-Term]	Q7TMY8 [3656-3676]	Q7TMY8 1xPhospho [S3663]	1	RAQCETLsPDGLPEE	Huwe1
Q7TMY8	GSGTAsDDEFENLR.Q7TMY8	3	GSGTAsDDEFENLR	0.00024026	7.62	7.7788	7.77878	7.88191	7.87435	7.70358	7.70546	7.80019	8.01434	8.02118	8.02817	8.19482	8.4177	8.35017	8.51855	8.0637	8.21884	8.25058	8.44339	8.48764	[R].GSGTASDDEFENLR.[I]	1xPhospho [S6]; 1xTMTpro [N-Term]	Q7TMY8 [1902-1915]	Q7TMY8 1xPhospho [S1907]	1	__GSGTAsDDEFENL	Huwe1
Q7TMY8	AEsPEEVAcRkEEEER.Q7TMY8	NA	AEsPEEVAcRkEEEER	0.132362	4.82167	5.1122	5.13171	5.13488	5.56682	5.19322	5.40022	5.61303	5.57258	5.34165	5.39084	5.0886	5.52706	5.80288	5.84007	5.61377	5.26671	5.28474	5.58321	5.45988	[R].AESPEEVACRKEEEER.[K]	1xCarbamidomethyl [C9]; 1xPhospho [S3]; 1xTMTpro [K11]; 1xTMTpro [N-Term]	Q7TMY8 [1393-1408]	Q7TMY8 1xPhospho [S1395]	1	_____AEsPEEVACR	Huwe1
Q7TMY8	AEsPEEVAcR.Q7TMY8	NA	AEsPEEVAcR	0.711892	5.88134	5.87574	6.06973	6.43658	5.87791	5.51835	6.06775	6.42643	6.32983	5.68637	5.70973	6.0072	6.18383	6.47502	6.50004	5.76028	6.06154	5.78117	6.18351	5.99306	[R].AESPEEVACR.[K]	1xCarbamidomethyl [C9]; 1xPhospho [S3]; 1xTMTpro [N-Term]	Q7TMY8 [1393-1402]	Q7TMY8 1xPhospho [S1395]	1	_____AEsPEEVACR	Huwe1
Q7TMY8	LGSSGLGsASSIQAAVR.Q7TMY8	5	LGSSGLGsASSIQAAVR	0.14104	6.12401	6.12563	6.30235	6.49167	6.36665	6.12325	6.12685	6.04467	6.23237	6.29303	6.07051	6.26861	6.09969	6.21462	6.27868	5.66557	5.97449	6.01936	6.21805	6.24418	[R].LGSSGLGSASSIQAAVR.[Q]	1xPhospho [S8]; 1xTMTpro [N-Term]	Q7TMY8 [3751-3767]	Q7TMY8 1xPhospho [S3758]	1	LGSSGLGsASSIQAA	Huwe1
Q7TN29	kAVGSmPTAGSAGsVPENLNLFPEPGSk.Q7TN29	NA	kAVGSmPTAGSAGsVPENLNLFPEPGSk	0.685747	6.45993	6.11287	6.26237	6.21902	6.16396	6.2588	6.47949	6.28221	6.45515	6.18342	6.04335	5.92619	6.20847	6.24626	6.17781	6.47103	6.05587	5.51293	6.72892	6.54562	[R].KAVGSMPTAGSAGSVPENLNLFPEPGSK.[S]	1xPhospho [S14]; 1xOxidation [M6]; 2xTMTpro [K1; K28]; 1xTMTpro [N-Term]	Q7TN29 [226-253]	Q7TN29 1xPhospho [S239]	1	PTAGSAGsVPENLNL	Smap2
[truncated: 976 more rows]
