# Supplementary material for: Dynamic proteomic and phosphoproteomic atlas of corticostriatal axons in neurodevelopment
Source: eLife. 2022 Oct 14;11:e78847. doi: 10.7554/eLife.78847 (PMC9629834; doi:10.7554/eLife.78847)
Supplement: Supplementary file 11. [file elife-78847-supp11.xlsx]

## Sheet: correlation_results
protein	pep.prot	pep	corr	pvalue	p_adjust	Modifications.in.Master.Proteins	FirstmodResidue	log2(adult/neonate)	Gene Symbol
A2A5R2	ERGsPVSGR.A2A5R2	ERGsPVSGR	0.82406	3.83879e-06	2.58077e-05	A2A5R2 1xPhospho [S276]	S276	1.22434	Arfgef2
A2A5R2	RcsVTSVESTVSSGTQTAIQDDPEQFEVIk.A2A5R2	RcsVTSVESTVSSGTQTAIQDDPEQFEVIk	0.263158	0.261163	0.321905	A2A5R2 1xPhospho [S621]	S621	1.22434	Arfgef2
A2A690	QLsRDSR.A2A690	QLsRDSR	-0.0601504	0.801607	0.834224	A2A690 1xPhospho [S1972]	S1972	0.0476803	Tanc2
A2A690	HTPLRTsLR.A2A690	HTPLRTsLR	0.454135	0.0457847	0.0709692	A2A690 1xPhospho [S294]	S294	0.0476803	Tanc2
A2A690	YQQETNVSQLPGRPksPLSk.A2A690	YQQETNVSQLPGRPksPLSk	0.526316	0.0185674	0.0323144	A2A690 1xPhospho [S1583]	S1583	0.0476803	Tanc2
A2A690	QSsVDSR.A2A690	QSsVDSR	0.0270677	0.911407	0.923575	A2A690 1xPhospho [S36]	S36	0.0476803	Tanc2
A2A690	FsPPPVGGQSk.A2A690	FsPPPVGGQSk	0.252632	0.281279	0.343105	A2A690 1xPhospho [S1521]	S1521	0.0476803	Tanc2
A2A690	ELPLTQAPSAHSSITSGScPGtPEmR.A2A690	ELPLTQAPSAHSSITSGScPGtPEmR	-0.148872	0.529556	0.591664	A2A690 1xPhospho [T434]	T434	0.0476803	Tanc2
A2A690	SNSSVGsPTR.A2A690	SNSSVGsPTR	0.584962	0.00778272	0.0152734	A2A690 1xPhospho [S1480]	S1480	0.0476803	Tanc2
A2A690	SQSGsPVR.A2A690	SQSGsPVR	0.136842	0.563763	0.623665	A2A690 1xPhospho [S1564]	S1564	0.0476803	Tanc2
A2A690	SQsASYYPVcHSk.A2A690	SQsASYYPVcHSk	0.221053	0.347374	0.412606	A2A690 1xPhospho [S1726]	S1726	0.0476803	Tanc2
A2A699	SARsVEGPGGLEPSLDEYR.A2A699	SARsVEGPGGLEPSLDEYR	0.62406	0.00399988	0.00858734	A2A699 1xPhospho [S445]	S445	-1.079	Fam171a2
A2A699	sVEGPGGLEPSLDEYRR.A2A699	sVEGPGGLEPSLDEYRR	0.58797	0.00741417	0.0146724	A2A699 1xPhospho [S445]	S445	-1.079	Fam171a2
A2A699	SARsVEGPGGLEPSLDEYRR.A2A699	SARsVEGPGGLEPSLDEYRR	0.642105	0.00285961	0.00644507	A2A699 1xPhospho [S445]	S445	-1.079	Fam171a2
A2A699	sVEGPGGLEPSLDEYR.A2A699	sVEGPGGLEPSLDEYR	0.655639	0.00219322	0.00510955	A2A699 1xPhospho [S445]	S445	-1.079	Fam171a2
A2A699	DLASsRDDFFR.A2A699	DLASsRDDFFR	0.753383	0.000191114	0.000630704	A2A699 1xPhospho [S410]	S410	-1.079	Fam171a2
A2AAE1	YTAGSAsPTPTFk.A2AAE1	YTAGSAsPTPTFk	0.407519	0.0756779	0.110328	A2AAE1 1xPhospho [S2603]	S2603	0.51701	Kiaa1109
A2AAE1	SDENVLDsPk.A2AAE1	SDENVLDsPk	-0.0496241	0.836247	0.862265	A2AAE1 1xPhospho [S1355]	S1355	0.51701	Kiaa1109
A2AAE1	TTFSENLsPkQDIR.A2AAE1	TTFSENLsPkQDIR	0.374436	0.10459	0.14614	A2AAE1 1xPhospho [S1681]	S1681	0.51701	Kiaa1109
A2AAE1	VVFENEQDNNsLTk.A2AAE1	VVFENEQDNNsLTk	0.192481	0.414491	0.480205	A2AAE1 1xPhospho [S2755]	S2755	0.51701	Kiaa1109
A2AAE1	AsPGSSSYLk.A2AAE1	AsPGSSSYLk	-0.0601504	0.801607	0.834224	A2AAE1 1xPhospho [S3196]	S3196	0.51701	Kiaa1109
A2AAE1	RDsISk.A2AAE1	RDsISk	0.398496	0.0828741	0.119634	A2AAE1 1xPhospho [S4378]	S4378	0.51701	Kiaa1109
A2AAE1	IGETDELPEIRVDAAsPGPR.A2AAE1	IGETDELPEIRVDAAsPGPR	-0.284211	0.223792	0.282047	A2AAE1 1xPhospho [S3653]	S3653	0.51701	Kiaa1109
A2AAE1	SSETFGPAGVRsPTEPTcR.A2AAE1	SSETFGPAGVRsPTEPTcR	0.296241	0.204132	0.261044	A2AAE1 1xPhospho [S2737]	S2737	0.51701	Kiaa1109
A2AAE1	TTFSENLsPk.A2AAE1	TTFSENLsPk	0.410526	0.0733881	0.107456	A2AAE1 1xPhospho [S1681]	S1681	0.51701	Kiaa1109
A2AAE1	ALETIPItPIER.A2AAE1	ALETIPItPIER	0.369925	0.109091	0.151799	A2AAE1 1xPhospho [T3996]	T3996	0.51701	Kiaa1109
A2AAE1	QIsDLIR.A2AAE1	QIsDLIR	0.479699	0.0338819	0.0552106	A2AAE1 1xPhospho [S2924]	S2924	0.51701	Kiaa1109
A2AAE1	TEsPNASR.A2AAE1	TEsPNASR	-0.102256	0.667262	0.718238	A2AAE1 1xPhospho [S3894]	S3894	0.51701	Kiaa1109
A2AG50	EEsLEkR.A2AG50	EEsLEkR	0.863158	0	0	A2AG50 1xPhospho [S401]	S401	1.65534	Map7d2
A2AHC3	LNscETk.A2AHC3	LNscETk	0.556391	0.0120956	0.0223049	A2AHC3 1xPhospho [S823]	S823	-0.596735	Camsap1
A2AHC3	RPsEGSQPmVR.A2AHC3	RPsEGSQPmVR	0.215038	0.360934	0.427632	A2AHC3 1xPhospho [S626]	S626	-0.596735	Camsap1
A2AHC3	TSPQAPGLVASIRsPQR.A2AHC3	TSPQAPGLVASIRsPQR	0.747368	0.000231131	0.000748075	A2AHC3 1xPhospho [S572]	S572	-0.596735	Camsap1
A2AHC3	APVHFVEPLsPTGVPGHR.A2AHC3	APVHFVEPLsPTGVPGHR	0.380451	0.0988034	0.138963	A2AHC3 1xPhospho [S1069]	S1069	-0.596735	Camsap1
A2AHC3	EQsPGRHSk.A2AHC3	EQsPGRHSk	0.430075	0.059768	0.0892348	A2AHC3 1xPhospho [S858]	S858	-0.596735	Camsap1
A2AHC3	IkAPVHFVEPLsPTGVPGHR.A2AHC3	IkAPVHFVEPLsPTGVPGHR	0.494737	0.0281232	0.0465685	A2AHC3 1xPhospho [S1069]	S1069	-0.596735	Camsap1
A2AJA9	GSsPEGR.A2AJA9	GSsPEGR	0.905263	2.02107e-06	1.60121e-05	A2AJA9 1xPhospho [S484]	S484	2.10999	Ajm1
A2AJA9	RPPVVVNLStSPR.A2AJA9	RPPVVVNLStSPR	0.315789	0.174755	0.228698	A2AJA9 1xPhospho [T498]	T498	2.10999	Ajm1
A2AJA9	ASQGLATAPAsPPVLQR.A2AJA9	ASQGLATAPAsPPVLQR	0	1	1	A2AJA9 1xPhospho [S109]	S109	2.10999	Ajm1
A2AJA9	VEGsPR.A2AJA9	VEGsPR	0.774436	9.10218e-05	0.000333605	A2AJA9 1xPhospho [S129]	S129	2.10999	Ajm1
A2AJA9	VALAAGsPTRPPPAR.A2AJA9	VALAAGsPTRPPPAR	0.789474	4.82234e-05	0.000191672	A2AJA9 1xPhospho [S854]	S854	2.10999	Ajm1
A2AJA9	GRsYENLLGR.A2AJA9	GRsYENLLGR	0.593985	0.00672003	0.0135379	A2AJA9 1xPhospho [S468]	S468	2.10999	Ajm1
A2AJI0	cSVsAVNLPk.A2AJI0	cSVsAVNLPk	-0.0330827	0.891264	0.908248	A2AJI0 1xPhospho [S256]	S256	0.101999	Map7d1
A2AJI0	sAVTLPR.A2AJI0	sAVTLPR	-0.18797	0.425705	0.490541	A2AJI0 1xPhospho [S315]	S315	0.101999	Map7d1
A2AJI0	SRsAVTLPR.A2AJI0	SRsAVTLPR	0.403008	0.079214	0.115056	A2AJI0 1xPhospho [S315]	S315	0.101999	Map7d1
A2AJI0	LSTGSELsPk.A2AJI0	LSTGSELsPk	0.0466165	0.846202	0.869102	A2AJI0 1xPhospho [S460]	S460	0.101999	Map7d1
A2AJI0	GTTAsPk.A2AJI0	GTTAsPk	0.606015	0.00549153	0.0114148	A2AJI0 1xPhospho [S503]	S503	0.101999	Map7d1
A2AJI0	RkPGAGGsPALAR.A2AJI0	RkPGAGGsPALAR	0.0796992	0.738284	0.782514	A2AJI0 1xPhospho [S401]	S401	0.101999	Map7d1
A2ALS5	SSAIGIENIQEVQEkREsPPAGQk.A2ALS5	SSAIGIENIQEVQEkREsPPAGQk	0.819549	6.73162e-06	3.38451e-05	A2ALS5 1xPhospho [S515]	S515	1.27863	Rap1gap
A2ALS5	REsPPAGQk.A2ALS5	REsPPAGQk	0.726316	0.000425399	0.00124498	A2ALS5 1xPhospho [S515]	S515	1.27863	Rap1gap
A2ALS5	RSsAIGIENIQEVQEk.A2ALS5	RSsAIGIENIQEVQEk	-0.282707	0.226335	0.284339	A2ALS5 1xPhospho [S499]	S499	1.27863	Rap1gap
A2ALS5	NRVEsAAQR.A2ALS5	NRVEsAAQR	-0.384962	0.0946229	0.134125	A2ALS5 1xPhospho [S554]	S554	1.27863	Rap1gap
A2ALS5	RSsAIGIENIQEVQEkR.A2ALS5	RSsAIGIENIQEVQEkR	-0.506767	0.024104	0.0408327	A2ALS5 1xPhospho [S499]	S499	1.27863	Rap1gap
A2ALU4	kAPsPPPLGLPLR.A2ALU4	kAPsPPPLGLPLR	0.854135	0	0	A2ALU4 1xPhospho [S318]	S318	-1.12237	Shroom2
A2ALU4	SPsPQFAPQk.A2ALU4	SPsPQFAPQk	-0.458647	0.0434755	0.0678817	A2ALU4 1xPhospho [S1043]	S1043	-1.12237	Shroom2
A2AN08	HVTLPSsPR.A2AN08	HVTLPSsPR	0.0917293	0.700101	0.74811	A2AN08 1xPhospho [S2716]	S2716	-0.512732	Ubr4
A2AN08	TLSDVEDQkELAsPVSPELR.A2AN08	TLSDVEDQkELAsPVSPELR	0.772932	9.64371e-05	0.000352355	A2AN08 1xPhospho [S178]	S178	-0.512732	Ubr4
A2AP18	kVAsVEEGDETLDSPGSQSR.A2AP18	kVAsVEEGDETLDSPGSQSR	0.875188	0	0	A2AP18 1xPhospho [S676]	S676	0.946838	Plch2
A2AP18	VAsVEEGDETLDSPGSQSR.A2AP18	VAsVEEGDETLDSPGSQSR	0.804511	2.17922e-05	9.5845e-05	A2AP18 1xPhospho [S676]	S676	0.946838	Plch2
A2APV2	sIEDLHR.A2APV2	sIEDLHR	0.845113	0	0	A2APV2 1xPhospho [S171]	S171	-1.62415	Fmnl2
A2AQ25	NRPGsLDk.A2AQ25	NRPGsLDk	0.945865	5.94947e-06	3.30168e-05	A2AQ25 1xPhospho [S1762]	S1762	2.57372	Skt
A2AQ25	TRAsLPVVR.A2AQ25	TRAsLPVVR	0.708271	0.000679865	0.00185368	A2AQ25 1xPhospho [S169]	S169	2.57372	Skt
A2AQ25	IPALsPSSGk.A2AQ25	IPALsPSSGk	0.771429	0.000102087	0.000367856	A2AQ25 1xPhospho [S1808]	S1808	2.57372	Skt
A2AQ25	SIsPSPSAILER.A2AQ25	SIsPSPSAILER	0.896241	7.48063e-07	6.90272e-06	A2AQ25 1xPhospho [S361]	S361	2.57372	Skt
A2AQ25	RQEQLsPEGTLPASR.A2AQ25	RQEQLsPEGTLPASR	0.786466	5.52894e-05	0.000215391	A2AQ25 1xPhospho [S1647]	S1647	2.57372	Skt
A2AR50	LVSskEDLAGPSAGSSSAR.A2AR50	LVSskEDLAGPSAGSSSAR	0.82406	3.83879e-06	2.58077e-05	A2AR50 1xPhospho [S298]	S298	-1.84598	Ralgps1
A2AWA9	ILITkEsPQDSAITR.A2AWA9	ILITkEsPQDSAITR	-0.0285714	0.906366	0.919654	A2AWA9 1xPhospho [S595]	S595	-0.202627	Rabgap1
A2CG49	ScsWHTLR.A2CG49	ScsWHTLR	0.732331	0.000360143	0.00108504	A2CG49 1xPhospho [S2374]	S2374	-0.696703	Kalrn
A2RSJ4	SAsDTNLQk.A2RSJ4	SAsDTNLQk	0.915789	3.36969e-06	2.35979e-05	A2RSJ4 1xPhospho [S952]	S952	1.24895	Uhrf1bp1l
A2TJV2	QGTSsPELPTWVk.A2TJV2	QGTSsPELPTWVk	0.609023	0.00521528	0.010947	A2TJV2 1xPhospho [S270]	S270	-0.138517	Palm3
B1AWN6	ASLFsFkGR.B1AWN6	ASLFsFkGR	-0.142857	0.546535	0.606602	B1AWN6 1xPhospho [S579]	S579	1.90782	Scn2a
B1AWN6	kSAsEDSIR.B1AWN6	kSAsEDSIR	0.891729	9.31678e-08	9.28915e-07	B1AWN6 1xPhospho [S528]	S528	1.90782	Scn2a
B1AWN6	GSLFsPR.B1AWN6	GSLFsPR	0.595489	0.00655513	0.013251	B1AWN6 1xPhospho [S568]	S568	1.90782	Scn2a
B1AWN6	GFRFsLEGSR.B1AWN6	GFRFsLEGSR	0.806015	1.98455e-05	8.86081e-05	B1AWN6 1xPhospho [S540]	S540	1.90782	Scn2a
B1AY13	VSDQNsPVLPk.B1AY13	VSDQNsPVLPk	0.732331	0.000360143	0.00108504	B1AY13 1xPhospho [S2044]	S2044	-0.33727	Usp24
B1AZP2	RQsYLR.B1AZP2	RQsYLR	0.2	0.396169	0.462393	B1AZP2 1xPhospho [S397]	S397	-0.560079	Dlgap4
B1AZP2	ANSWQLVEtPEkR.B1AZP2	ANSWQLVEtPEkR	0.792481	4.18073e-05	0.000169901	B1AZP2 1xPhospho [T915]	T915	-0.560079	Dlgap4
B1AZP2	AIQAGcSQEEDSVSLQSLsPPPSTGSLSNSR.B1AZP2	AIQAGcSQEEDSVSLQSLsPPPSTGSLSNSR	-0.0135338	0.956905	0.963457	B1AZP2 1xPhospho [S534]	S534	-0.560079	Dlgap4
B1AZP2	RsLDRLDSVDmLLPSk.B1AZP2	RsLDRLDSVDmLLPSk	0.0676692	0.777083	0.814829	B1AZP2 1xPhospho [S415]	S415	-0.560079	Dlgap4
B1AZP2	QNsATESADSIEIYVPEAQTR.B1AZP2	QNsATESADSIEIYVPEAQTR	0.571429	0.0096326	0.0183824	B1AZP2 1xPhospho [S973]	S973	-0.560079	Dlgap4
B2RUJ5	SPYtPDEPkEPIWVmR.B2RUJ5	SPYtPDEPkEPIWVmR	0.565414	0.0105631	0.0199477	B2RUJ5 1xPhospho [T375]	T375	-0.734943	Apba1
B2RUJ5	SNsQENVEASHPSQDGk.B2RUJ5	SNsQENVEASHPSQDGk	0.903759	1.81463e-06	1.45728e-05	B2RUJ5 1xPhospho [S573]	S573	-0.734943	Apba1
B2RUJ5	QDIsPTR.B2RUJ5	QDIsPTR	0.332331	0.152316	0.203404	B2RUJ5 1xPhospho [S391]	S391	-0.734943	Apba1
B2RUJ5	VVGtPGGSEVGQR.B2RUJ5	VVGtPGGSEVGQR	0.135338	0.568108	0.626116	B2RUJ5 1xPhospho [T333]	T333	-0.734943	Apba1
B2RUJ5	SDGESDsPEkEAEFAPYPR.B2RUJ5	SDGESDsPEkEAEFAPYPR	0.377444	0.101666	0.142393	B2RUJ5 1xPhospho [S252]	S252	-0.734943	Apba1
B9EJA2	DVsPTSR.B9EJA2	DVsPTSR	0.332331	0.152316	0.203404	B9EJA2 1xPhospho [S472]	S472	0.883768	Cttnbp2
D3YVF0	ASLLESSAAGsPR.D3YVF0	ASLLESSAAGsPR	0.827068	2.24499e-06	1.72067e-05	D3YVF0 1xPhospho [S251]	S251	1.36303	Akap5
D3YVF0	GPVAAsPQkER.D3YVF0	GPVAAsPQkER	0.694737	0.00094183	0.00247336	D3YVF0 1xPhospho [S22]	S22	1.36303	Akap5
D3YVF0	SSAIQmGtPELEk.D3YVF0	SSAIQmGtPELEk	0.524812	0.0189528	0.0329365	D3YVF0 1xPhospho [T220]	T220	1.36303	Akap5
D3YVF0	GPVAAsPQk.D3YVF0	GPVAAsPQk	0.810526	1.46396e-05	6.80768e-05	D3YVF0 1xPhospho [S22]	S22	1.36303	Akap5
D3YXK2	SEsPSTR.D3YXK2	SEsPSTR	0.715789	0.000562121	0.00157649	D3YXK2 1xPhospho [S298]	S298	-1.55295	Safb
D3YXK2	APTAALsPEPQDSkEDVk.D3YXK2	APTAALsPEPQDSkEDVk	0.666165	0.00176841	0.00423733	D3YXK2 1xPhospho [S366]	S366	-1.55295	Safb
D3YXK2	RLsEGR.D3YXK2	RLsEGR	0.885714	0	0	D3YXK2 1xPhospho [S829]	S829	-1.55295	Safb
D3YZP9	LDQPVSAPPsPR.D3YZP9	LDQPVSAPPsPR	0.58797	0.00741417	0.0146724	D3YZP9 1xPhospho [S237]	S237	-0.496831	Ccdc6
D3YZP9	RSSsPDk.D3YZP9	RSSsPDk	0.124812	0.598936	0.655487	D3YZP9 1xPhospho [S412]	S412	-0.496831	Ccdc6
D3YZU1	RAPsPSLLPASDHk.D3YZU1	RAPsPSLLPASDHk	0.742857	0.000265205	0.000836499	D3YZU1 1xPhospho [S2006]	S2006	-0.80907	Shank1
E9PUL5	AHGGHPGsPR.E9PUL5	AHGGHPGsPR	0.778947	7.61096e-05	0.000286537	E9PUL5 1xPhospho [S244]	S244	1.80336	Prrt2
E9Q3L2	RRsFNDFR.E9Q3L2	RRsFNDFR	0.816541	9.03085e-06	4.45484e-05	E9Q3L2 1xPhospho [S233]	S233	2.92706	Pi4ka
E9Q401	IAEDPSRDGPsPTSGSSk.E9Q401	IAEDPSRDGPsPTSGSSk	0.968421	6.56235e-06	3.38235e-05	E9Q401 1xPhospho [S2362]	S2362	3.42195	Ryr2
E9Q401	RIsQTSQVSIDAAHGYSPR.E9Q401	RIsQTSQVSIDAAHGYSPR	0.431579	0.0588075	0.0878565	E9Q401 1xPhospho [S2807]	S2807	3.42195	Ryr2
E9Q7G0	TQPDGTSVPGEPAsPISQR.E9Q7G0	TQPDGTSVPGEPAsPISQR	0.541353	0.0150505	0.0269717	E9Q7G0 1xPhospho [S1739]	S1739	-1.5844	Numa1
E9Q8I9	SSsPDLSSSSk.E9Q8I9	SSsPDLSSSSk	0.691729	0.00100994	0.00262584	E9Q8I9 1xPhospho [S1940]	S1940	0.172664	Fry
F6SEU4	QQsLSk.F6SEU4	QQsLSk	0.2	0.396169	0.462393	F6SEU4 1xPhospho [S1105]	S1105	1.65137	Syngap1
F6SEU4	FRsADHDR.F6SEU4	FRsADHDR	0.535338	0.0163857	0.0289891	F6SEU4 1xPhospho [S165]	S165	1.65137	Syngap1
F6ZDS4	QTPQAPQsPR.F6ZDS4	QTPQAPQsPR	0.681203	0.00128076	0.00320941	F6ZDS4 1xPhospho [S2141]	S2141	-1.31115	Tpr
G5E8K5	TEEPVsPLTAYQk.G5E8K5	TEEPVsPLTAYQk	0.888722	0	0	G5E8K5 1xPhospho [S1883]	S1883	2.32392	Ank3
G5E8K5	RQsFASLALR.G5E8K5	RQsFASLALR	0.903759	1.81463e-06	1.45728e-05	G5E8K5 1xPhospho [S1451]	S1451	2.32392	Ank3
O08539	GNksPsPPPDGSPAATPEIR.O08539	GNksPsPPPDGSPAATPEIR	0.687218	0.00111959	0.00287598	O08539 2xPhospho [S296; S298]	S296	1.31343	Bin1
O08539	VNHEPEPASGASPGATIPksPSQLR.O08539	VNHEPEPASGASPGATIPksPSQLR	-0.323308	0.164286	0.217905	O08539 1xPhospho [S332]	S332	1.31343	Bin1
O08553	TsPAkQQAPPVR.O08553	TsPAkQQAPPVR	0.634586	0.00329667	0.00729733	O08553 1xPhospho [S522]	S522	-0.144758	Dpysl2
O08553	NLHQSGFSLsGAQIDDNIPR.O08553	NLHQSGFSLsGAQIDDNIPR	0.503759	0.0250626	0.0422437	O08553 1xPhospho [S542]	S542	-0.144758	Dpysl2
O08553	GLYDGPVcEVSVtPk.O08553	GLYDGPVcEVSVtPk	0.482707	0.0326611	0.0533692	O08553 1xPhospho [T509]	T509	-0.144758	Dpysl2
O08715	RLsEEAcPGVLSVAPTVTQPPGREEQR.O08715	RLsEEAcPGVLSVAPTVTQPPGREEQR	0.732331	0.000360143	0.00108504	O08715 1xPhospho [S55]	S55	-1.35186	Akap1
O08784	ASAVsPEkAPmTSk.O08784	ASAVsPEkAPmTSk	0.577444	0.0087704	0.0169292	O08784 1xPhospho [S1216]	S1216	-2.20133	Tcof1
O08784	kLsGDLEAGAPk.O08784	kLsGDLEAGAPk	0.390977	0.0892565	0.127517	O08784 1xPhospho [S1191]	S1191	-2.20133	Tcof1
O08919	RTPsEAER.O08919	RTPsEAER	0.857143	0	0	O08919 1xPhospho [S411]	S411	0.795614	Numbl
O08919	QLsLRLNELPSTLQR.O08919	QLsLRLNELPSTLQR	-0.437594	0.0550843	0.0832991	O08919 1xPhospho [S324]	S324	0.795614	Numbl
O35099	LSALSTGsNEYLR.O35099	LSALSTGsNEYLR	0.475188	0.0357808	0.0579039	O35099 1xPhospho [S965]	S965	1.65289	Map3k5
O35495	SSSAGkEsPkVR.O35495	SSSAGkEsPkVR	0.93985	5.59971e-06	3.20587e-05	O35495 1xPhospho [S112]	S112	1.57112	Cdk14
O35495	RVHsENNAcINFk.O35495	RVHsENNAcINFk	0.347368	0.133767	0.18131	O35495 1xPhospho [S95]	S95	1.57112	Cdk14
O35526	TAkDsDDDDDVTVTVDRDR.O35526	TAkDsDDDDDVTVTVDRDR	0.935338	5.28234e-06	3.13082e-05	O35526 1xPhospho [S14]	S14	2.3463	Stx1a
O35526	TAkDsDDDDDVTVTVDR.O35526	TAkDsDDDDDVTVTVDR	0.933835	5.16599e-06	3.09302e-05	O35526 1xPhospho [S14]	S14	2.3463	Stx1a
O35551	RAQsTDSLGTSSSLQSk.O35551	RAQsTDSLGTSSSLQSk	-0.0150376	0.951841	0.959589	O35551 1xPhospho [S407]	S407	-0.1374	Rabep1
O35607	SVsPTVNPmSTAmQNER.O35607	SVsPTVNPmSTAmQNER	0.133835	0.572468	0.630331	O35607 1xPhospho [S515]	S515	0.540625	Bmpr2
O35607	LNINSsPDEHEPLLR.O35607	LNINSsPDEHEPLLR	0.43609	0.0559975	0.0843008	O35607 1xPhospho [S863]	S863	0.540625	Bmpr2
O35609	kLsPTEPR.O35609	kLsPTEPR	0.867669	0	0	O35609 1xPhospho [S78]	S78	0.970148	Scamp3
O35681	GLSEkENsE.O35681	GLSEkENsE	0.774436	9.10218e-05	0.000333605	O35681 1xPhospho [S586]	S586	1.21614	Syt3
O35691	EAGIVHsDAEk.O35691	EAGIVHsDAEk	0.616541	0.00457438	0.00967943	O35691 1xPhospho [S346]	S346	-1.79449	Pnn
O35691	ESRQEsDPEDDDVkkPALQSSVVATSk.O35691	ESRQEsDPEDDDVkkPALQSSVVATSk	0.685714	0.00115823	0.00294949	O35691 1xPhospho [S100]	S100	-1.79449	Pnn
O35927	SLsQSQGDPLPPAHTGTFR.O35927	SLsQSQGDPLPPAHTGTFR	-0.484211	0.032064	0.0525028	O35927 1xPhospho [S435]	S435	-0.186628	Ctnnd2
O35927	ALQsPEHHIDPIYEDR.O35927	ALQsPEHHIDPIYEDR	0.389474	0.0905761	0.128933	O35927 1xPhospho [S412]	S412	-0.186628	Ctnnd2
O35927	GGsAPEGAAYAAPR.O35927	GGsAPEGAAYAAPR	0.117293	0.621381	0.675964	O35927 1xPhospho [S282]	S282	-0.186628	Ctnnd2
O35927	TPSIsPVR.O35927	TPSIsPVR	-0.043609	0.85618	0.877053	O35927 1xPhospho [S1082]	S1082	-0.186628	Ctnnd2
O35927	NSSLsPGLNTSNGDGSETETTSAILASVk.O35927	NSSLsPGLNTSNGDGSETETTSAILASVk	0.442105	0.0524142	0.0796709	O35927 1xPhospho [S32]	S32	-0.186628	Ctnnd2
O35927	TGsQHGPQNAAAATFQR.O35927	TGsQHGPQNAAAATFQR	0.330827	0.154266	0.205659	O35927 1xPhospho [S471]	S471	-0.186628	Ctnnd2
O35927	EmIsLkER.O35927	EmIsLkER	0.321805	0.166343	0.219398	O35927 1xPhospho [S1104]	S1104	-0.186628	Ctnnd2
O35927	GGSPLTTTQGGsPTkLQR.O35927	GGSPLTTTQGGsPTkLQR	0.186466	0.42948	0.493923	O35927 1xPhospho [S273]	S273	-0.186628	Ctnnd2
O35954	WNsNDFIDAFASPTEVEGVPDPTVmATk.O35954	WNsNDFIDAFASPTEVEGVPDPTVmATk	0.497744	0.0270715	0.0450171	O35954 1xPhospho [S373]	S373	0.545811	Pitpnm1
O35954	AsPEPSALPAQR.O35954	AsPEPSALPAQR	-0.00300752	0.992392	0.994929	O35954 1xPhospho [S621]	S621	0.545811	Pitpnm1
O35954	SSTEARPGTSTAGTPDGPEAPPGPDAsPDASFGk.O35954	SSTEARPGTSTAGTPDGPEAPPGPDAsPDASFGk	0.368421	0.110623	0.153386	O35954 1xPhospho [S300]	S300	0.545811	Pitpnm1
O54774	NAEAVksPEkEGVLGVEk.O54774	NAEAVksPEkEGVLGVEk	0.618045	0.00445435	0.00944243	O54774 1xPhospho [S825]	S825	1.49706	Ap3d1
O54829	SHsPTHTPTPETkPPTEDELHQQIk.O54829	SHsPTHTPTPETkPPTEDELHQQIk	0.842105	0	0	O54829 1xPhospho [S241]	S241	1.97788	Rgs7
O55017	RGsPEEATEREPR.O55017	RGsPEEATEREPR	0.878195	0	0	O55017 1xPhospho [S915]	S915	0.969726	Cacna1b
O55017	AkEVAEVsPmSAANISIAAR.O55017	AkEVAEVsPmSAANISIAAR	0.675188	0.00146046	0.00355741	O55017 1xPhospho [S745]	S745	0.969726	Cacna1b
O55017	GsPEEATER.O55017	GsPEEATER	0.593985	0.00672003	0.0135379	O55017 1xPhospho [S915]	S915	0.969726	Cacna1b
O55017	GLsEHNALLQkEPLSQPLAPGSR.O55017	GLsEHNALLQkEPLSQPLAPGSR	-0.46015	0.0427264	0.0670235	O55017 1xPhospho [S2221]	S2221	0.969726	Cacna1b
O55017	GLsEHNALLQk.O55017	GLsEHNALLQk	0.649624	0.00247148	0.00567355	O55017 1xPhospho [S2221]	S2221	0.969726	Cacna1b
O55017	IGsDPYLGQR.O55017	IGsDPYLGQR	0.676692	0.00141371	0.00347592	O55017 1xPhospho [S2244]	S2244	0.969726	Cacna1b
O55017	ESLsWGTQR.O55017	ESLsWGTQR	0.393985	0.0866607	0.124185	O55017 1xPhospho [S1929]	S1929	0.969726	Cacna1b
O55017	RSHskETPGADTQVR.O55017	RSHskETPGADTQVR	0.867669	0	0	O55017 1xPhospho [S892]	S892	0.969726	Cacna1b
O55106	FLESAAADVsDEDEDEDTDGR.O55106	FLESAAADVsDEDEDEDTDGR	-0.135338	0.568108	0.626116	O55106 1xPhospho [S245]	S245	1.0006	Strn
O55106	FLESAAADVsDEDEDEDTDGRAk.O55106	FLESAAADVsDEDEDEDTDGRAk	-0.359398	0.12015	0.164655	O55106 1xPhospho [S245]	S245	1.0006	Strn
O55131	IYEFPEtDDEEENkLVk.O55131	IYEFPEtDDEEENkLVk	0.664662	0.00182457	0.00435858	O55131 1xPhospho [T227]	T227	2.49706	Septin7
O55201	DVTNLTVGGFTPmsPR.O55201	DVTNLTVGGFTPmsPR	0.344361	0.137339	0.185511	O55201 1xPhospho [S664]	S664	-0.170573	Supt5h
O70161	RTQsSGQDGRPQEEPHAEDLQk.O70161	RTQsSGQDGRPQEEPHAEDLQk	0.971429	6.5692e-06	3.38235e-05	O70161 1xPhospho [S554]	S554	2.85266	Pip5k1c
O70161	SWVYSPLHYSARPASDGEsDT.O70161	SWVYSPLHYSARPASDGEsDT	0.681203	0.00128076	0.00320941	O70161 1xPhospho [S659]	S659	2.85266	Pip5k1c
O70166	RkDAsLEELQk.O70166	RkDAsLEELQk	0.293233	0.208932	0.266027	O70166 1xPhospho [S81]	S81	-2.1035	Stmn3
O70166	DAsLEELQk.O70166	DAsLEELQk	-0.242105	0.302355	0.365404	O70166 1xPhospho [S81]	S81	-2.1035	Stmn3
O70305	ALtPSIEAk.O70305	ALtPSIEAk	0.801504	2.60281e-05	0.00011095	O70305 1xPhospho [T710]	T710	-0.765356	Atxn2
O70433	YIsFEER.O70433	YIsFEER	0.93985	5.59971e-06	3.20587e-05	O70433 1xPhospho [S238]	S238	1.70796	Fhl2
O70435	ESLkEEDEsDDDNm.O70435	ESLkEEDEsDDDNm	0.633083	0.00339037	0.0074696	O70435 1xPhospho [S250]	S250	-1.4845	Psma3
O70439	TLNQLGtPQDSPELR.O70439	TLNQLGtPQDSPELR	0.833083	0	0	O70439 1xPhospho [T41]	T41	-0.446456	Stx7
O70443	QSSEEkEAARRsR.O70443	QSSEEkEAARRsR	-0.156391	0.508693	0.569978	O70443 1xPhospho [S16]	S16	1.43218	Gnaz
O70589	DsPSTSR.O70589	DsPSTSR	-0.273684	0.242002	0.30065	O70589 1xPhospho [S582]	S582	0.131849	Cask
O70589	FTSsPGLSTEDLkR.O70589	FTSsPGLSTEDLkR	0.828571	1.53983e-06	1.29864e-05	O70589 1xPhospho [S51]	S51	0.131849	Cask
O88447	VDsPTVTTTLk.O88447	VDsPTVTTTLk	0.834586	0	0	O88447 1xPhospho [S459]	S459	-0.989609	Klc1
O88448	SGsFGkLR.O88448	SGsFGkLR	0.53985	0.0153757	0.0274917	O88448 1xPhospho [S539]	S539	-0.701674	Klc2
O88448	ASsLNFLNk.O88448	ASsLNFLNk	0.851128	0	0	O88448 1xPhospho [S575]	S575	-0.701674	Klc2
O88448	RGsRDVAGPQSESDLEESGPAAEWSGDGSGSLR.O88448	RGsRDVAGPQSESDLEESGPAAEWSGDGSGSLR	0.142857	0.546535	0.606602	O88448 1xPhospho [S505]	S505	-0.701674	Klc2
O88448	SGsFGk.O88448	SGsFGk	0.148872	0.529556	0.591664	O88448 1xPhospho [S539]	S539	-0.701674	Klc2
O88485	ANRADsEEEGAVELAA.O88485	ANRADsEEEGAVELAA	-0.36391	0.115314	0.158768	O88485 1xPhospho [S618]	S618	0.711965	Dync1i1
O88487	EAEALLQSmGLTTDSPIVPPPmsPSSk.O88487	EAEALLQSmGLTTDSPIVPPPmsPSSk	0.0526316	0.826316	0.853147	O88487 1xPhospho [S81]	S81	-0.206678	Dync1i2
O88532	RRDsDGVDGFEAEGk.O88532	RRDsDGVDGFEAEGk	0.679699	0.00132389	0.00329641	O88532 1xPhospho [S1054]	S1054	-0.76707	Zfr
O88532	RRDsDGVDGFEAEGkk.O88532	RRDsDGVDGFEAEGkk	0.789474	4.82234e-05	0.000191672	O88532 1xPhospho [S1054]	S1054	-0.76707	Zfr
O88704	LGtPPGGGAAGk.O88704	LGtPPGGGAAGk	0.790977	4.49369e-05	0.000180438	O88704 1xPhospho [T39]	T39	2.34239	Hcn1
O88737	AQGPSGQEAEsPRR.O88737	AQGPSGQEAEsPRR	0.888722	0	0	O88737 1xPhospho [S121]	S121	4.39289	Bsn
O88737	TLPsPPPEEAHLPLAGQVPSQLYAASLLQR.O88737	TLPsPPPEEAHLPLAGQVPSQLYAASLLQR	0.753383	0.000191114	0.000630704	O88737 1xPhospho [S2908]	S2908	4.39289	Bsn
O88737	AHVsPQkQFIADSTLR.O88737	AHVsPQkQFIADSTLR	0.748872	0.000220568	0.000720829	O88737 1xPhospho [S2832]	S2832	4.39289	Bsn
O88737	ISkFsPIEEAk.O88737	ISkFsPIEEAk	0.6	0.00608027	0.01243	O88737 1xPhospho [S3382]	S3382	4.39289	Bsn
O88737	GEEEsEEDSYDPR.O88737	GEEEsEEDSYDPR	0.92782	4.64804e-06	2.94763e-05	O88737 1xPhospho [S3301]	S3301	4.39289	Bsn
O88737	QASATAPGREsPR.O88737	QASATAPGREsPR	0.825564	3.01037e-06	2.15301e-05	O88737 1xPhospho [S105]	S105	4.39289	Bsn
O88737	QILEmsAEEDNLEEDDTAVSGR.O88737	QILEmsAEEDNLEEDDTAVSGR	0.233083	0.321182	0.384601	O88737 1xPhospho [S865]	S865	4.39289	Bsn
O88737	SQGsFEYQDTQDHDYGGR.O88737	SQGsFEYQDTQDHDYGGR	0.869173	0	0	O88737 1xPhospho [S1236]	S1236	4.39289	Bsn
O88737	LLDTSFAsSERLNk.O88737	LLDTSFAsSERLNk	0.735338	0.00033065	0.00101304	O88737 1xPhospho [S2822]	S2822	4.39289	Bsn
O88737	mASAYsGEk.O88737	mASAYsGEk	0.900752	1.39393e-06	1.1927e-05	O88737 1xPhospho [S3460]	S3460	4.39289	Bsn
O88737	LHSsPVSSTLTSk.O88737	LHSsPVSSTLTSk	0.784962	5.90806e-05	0.00022827	O88737 1xPhospho [S1370]	S1370	4.39289	Bsn
O88737	RIADSSVQtDDEEGEGR.O88737	RIADSSVQtDDEEGEGR	0.801504	2.60281e-05	0.00011095	O88737 1xPhospho [T2595]	T2595	4.39289	Bsn
O88737	SPSVsPDRGSTPTSPYSVPQIAPLPSSTLcPIck.O88737	SPSVsPDRGSTPTSPYSVPQIAPLPSSTLcPIck	0.920301	3.8853e-06	2.58983e-05	O88737 1xPhospho [S142]	S142	4.39289	Bsn
O88737	GLPSSAsDmSLQTEEQWEAGR.O88737	GLPSSAsDmSLQTEEQWEAGR	-0.184962	0.433273	0.497799	O88737 1xPhospho [S2544]	S2544	4.39289	Bsn
O88737	ATsVPGPTQATAPPEVGR.O88737	ATsVPGPTQATAPPEVGR	0.711278	0.00063059	0.00173745	O88737 1xPhospho [S284]	S284	4.39289	Bsn
O88737	SPSVsPDR.O88737	SPSVsPDR	0.938346	5.4992e-06	3.19496e-05	O88737 1xPhospho [S142]	S142	4.39289	Bsn
O88737	EkPLsGGDSEVGAPQPSR.O88737	EkPLsGGDSEVGAPQPSR	0.915789	3.36969e-06	2.35979e-05	O88737 1xPhospho [S1460]	S1460	4.39289	Bsn
O88737	FsPIEEAk.O88737	FsPIEEAk	0.789474	4.82234e-05	0.000191672	O88737 1xPhospho [S3382]	S3382	4.39289	Bsn
O88737	ASPQATkAsPQTTk.O88737	ASPQATkAsPQTTk	0.903759	1.81463e-06	1.45728e-05	O88737 1xPhospho [S593]	S593	4.39289	Bsn
O88737	SPGPPsPmVAQGTQTPHRPSTPR.O88737	SPGPPsPmVAQGTQTPHRPSTPR	0.885714	0	0	O88737 1xPhospho [S1530]	S1530	4.39289	Bsn
O88737	QASATAPGREsPRETR.O88737	QASATAPGREsPRETR	0.827068	2.24499e-06	1.72067e-05	O88737 1xPhospho [S105]	S105	4.39289	Bsn
O88737	IADSSVQtDDEEGEGR.O88737	IADSSVQtDDEEGEGR	0.714286	0.000584242	0.00162882	O88737 1xPhospho [T2595]	T2595	4.39289	Bsn
O88737	SADcSVQtDDEDNADWEQPVRR.O88737	SADcSVQtDDEDNADWEQPVRR	0.83609	0	0	O88737 1xPhospho [T2622]	T2622	4.39289	Bsn
O88737	TTsPTPk.O88737	TTsPTPk	0.702256	0.00078778	0.00211603	O88737 1xPhospho [S90]	S90	4.39289	Bsn
O88737	SkSQQQLHsPALsPAHSPAkQPLGkPEQER.O88737	SkSQQQLHsPALsPAHSPAkQPLGkPEQER	0.702256	0.00078778	0.00211603	O88737 2xPhospho [S241; S245]	S241	4.39289	Bsn
O88737	TGGTAsPk.O88737	TGGTAsPk	0.915789	3.36969e-06	2.35979e-05	O88737 1xPhospho [S435]	S435	4.39289	Bsn
O88737	LLDTSFAsSER.O88737	LLDTSFAsSER	0.845113	0	0	O88737 1xPhospho [S2822]	S2822	4.39289	Bsn
O88737	DYLsDSELNQLR.O88737	DYLsDSELNQLR	0.858647	0	0	O88737 1xPhospho [S3022]	S3022	4.39289	Bsn
O88737	SADcSVQtDDEDNADWEQPVR.O88737	SADcSVQtDDEDNADWEQPVR	0.413534	0.0711515	0.104441	O88737 1xPhospho [T2622]	T2622	4.39289	Bsn
O88738	VITDPSLSkTDsFkR.O88738	VITDPSLSkTDsFkR	0.263158	0.261163	0.321905	O88738 1xPhospho [S4047]	S4047	-0.860734	Birc6
O88809	GNPSAAAGPkAsPTPQk.O88809	GNPSAAAGPkAsPTPQk	0.873684	0	0	O88809 1xPhospho [S287]	S287	-5.82297	Dcx
O88809	TSAksPGPmR.O88809	TSAksPGPmR	0.944361	5.86982e-06	3.28069e-05	O88809 1xPhospho [S297]	S297	-5.82297	Dcx
O88809	QSPISTPTsPGSLR.O88809	QSPISTPTsPGSLR	0.911278	2.81457e-06	2.10244e-05	O88809 1xPhospho [S339]	S339	-5.82297	Dcx
O88809	TSAksPGPmRR.O88809	TSAksPGPmRR	0.942857	5.785e-06	3.24871e-05	O88809 1xPhospho [S297]	S297	-5.82297	Dcx
O88935	QAsISGPAPTk.O88935	QAsISGPAPTk	0.584962	0.00778272	0.0152734	O88935 1xPhospho [S568]	S568	3.22045	Syn1
O88935	QPQRDAsPGR.O88935	QPQRDAsPGR	0.618045	0.00445435	0.00944243	O88935 1xPhospho [S427]	S427	3.22045	Syn1
O89026	LAsIEAR.O89026	LAsIEAR	0.592481	0.00688833	0.0138532	O89026 1xPhospho [S1474]	S1474	-2.4647	Robo1
O89026	EAYADDLPPPPVPPPAIksPTVQSk.O89026	EAYADDLPPPPVPPPAIksPTVQSk	0.900752	1.39393e-06	1.1927e-05	O89026 1xPhospho [S1453]	S1453	-2.4647	Robo1
O89026	kVPsFTFTPTVTYQR.O89026	kVPsFTFTPTVTYQR	0.891729	9.31678e-08	9.28915e-07	O89026 1xPhospho [S901]	S901	-2.4647	Robo1
O89026	GSSTSGsQGHk.O89026	GSSTSGsQGHk	0.721805	0.000480272	0.00137647	O89026 1xPhospho [S1123]	S1123	-2.4647	Robo1
O89032	AAsQGSESPLLPTQR.O89032	AAsQGSESPLLPTQR	0.390977	0.0892565	0.127517	O89032 1xPhospho [S1029]	S1029	1.75616	Sh3pxd2a
O89032	RIsPASSLQR.O89032	RIsPASSLQR	0.809023	1.62733e-05	7.46413e-05	O89032 1xPhospho [S592]	S592	1.75616	Sh3pxd2a
O89032	AQISsPNLR.O89032	AQISsPNLR	0.312782	0.179071	0.233955	O89032 1xPhospho [S420]	S420	1.75616	Sh3pxd2a
O89084	GYsDSAER.O89084	GYsDSAER	0.959398	6.44201e-06	3.38235e-05	O89084 1xPhospho [S49]	S49	2.95445	Pde4a
O89084	LVHTGsLNINVPR.O89084	LVHTGsLNINVPR	0.189474	0.421949	0.487167	O89084 1xPhospho [S333]	S333	2.95445	Pde4a
O89084	SLsLSLPGPR.O89084	SLsLSLPGPR	0.899248	1.18028e-06	1.0286e-05	O89084 1xPhospho [S13]	S13	2.95445	Pde4a
P05480	LFGGFNSSDTVTsPQR.P05480	LFGGFNSSDTVTsPQR	0.66015	0.00200192	0.00471995	P05480 1xPhospho [S74]	S74	-0.372116	Src
P05480	RRsLEPSENVHGAGGAFPASQTPSkPASADGHR.P05480	RRsLEPSENVHGAGGAFPASQTPSkPASADGHR	0.464662	0.04054	0.0643661	P05480 1xPhospho [S17]	S17	-0.372116	Src
P06837	IQAsFRGHITR.P06837	IQAsFRGHITR	0.210526	0.371305	0.437716	P06837 1xPhospho [S41]	S41	-0.903599	Gap43
P06837	kEGDGSATTDAAPATsPk.P06837	kEGDGSATTDAAPATsPk	0.24812	0.290194	0.352518	P06837 1xPhospho [S96]	S96	-0.903599	Gap43
P06837	AGsAETESAAk.P06837	AGsAETESAAk	0.138346	0.559433	0.619457	P06837 1xPhospho [S128]	S128	-0.903599	Gap43
P06837	ATTDNsPSSk.P06837	ATTDNsPSSk	0.380451	0.0988034	0.138963	P06837 1xPhospho [S142]	S142	-0.903599	Gap43
P07901	ESDDkPEIEDVGsDEEEEEk.P07901	ESDDkPEIEDVGsDEEEEEk	-0.00451128	0.98732	0.990266	P07901 1xPhospho [S263]	S263	0.233938	Hsp90aa1
P07901	EVsDDEAEEk.P07901	EVsDDEAEEk	-0.0842105	0.723889	0.770032	P07901 1xPhospho [S231]	S231	0.233938	Hsp90aa1
P08551	EEsAGEEQVAk.P08551	EEsAGEEQVAk	0.0646617	0.786869	0.822159	P08551 1xPhospho [S532]	S532	3.87994	Nefl
P08551	DEPPsEGEAEEEEk.P08551	DEPPsEGEAEEEEk	0.807519	1.80072e-05	8.10153e-05	P08551 1xPhospho [S473]	S473	3.87994	Nefl
P08553	kAEsPVkEk.P08553	kAEsPVkEk	0.96391	6.52156e-06	3.38235e-05	P08553 1xPhospho [S669]	S669	3.47922	Nefm
P08553	sPQESk.P08553	sPQESk	0.878195	0	0	P08553 1xPhospho [S723]	S723	3.47922	Nefm
P08553	GSGREEEkGVVTNGLDVsPAEEk.P08553	GSGREEEkGVVTNGLDVsPAEEk	0.685714	0.00115823	0.00294949	P08553 1xPhospho [S769]	S769	3.47922	Nefm
P08553	sPVEEVkPkPEAk.P08553	sPVEEVkPkPEAk	0.965414	6.53935e-06	3.38235e-05	P08553 1xPhospho [S610]	S610	3.47922	Nefm
P08553	EVTkEsPk.P08553	EVTkEsPk	0.890226	0	0	P08553 1xPhospho [S645]	S645	3.47922	Nefm
P08553	AEEEGGsEEEGSDR.P08553	AEEEGGsEEEGSDR	0.954887	6.32144e-06	3.38235e-05	P08553 1xPhospho [S715]	S715	3.47922	Nefm
P08553	QLQSksIELESVR.P08553	QLQSksIELESVR	0.897744	9.64874e-07	8.66545e-06	P08553 1xPhospho [S326]	S326	3.47922	Nefm
P08553	VSGsPSSGFR.P08553	VSGsPSSGFR	0.864662	0	0	P08553 1xPhospho [S30]	S30	3.47922	Nefm
P08553	sIELESVR.P08553	sIELESVR	0.810526	1.46396e-05	6.80768e-05	P08553 1xPhospho [S326]	S326	3.47922	Nefm
P08553	AEsPVkEk.P08553	AEsPVkEk	0.873684	0	0	P08553 1xPhospho [S669]	S669	3.47922	Nefm
P08553	EGSsEk.P08553	EGSsEk	0.813534	1.16574e-05	5.63242e-05	P08553 1xPhospho [S551]	S551	3.47922	Nefm
P08553	GVVTNGLDVsPAEEkkGEDSSDDkVVVTk.P08553	GVVTNGLDVsPAEEkkGEDSSDDkVVVTk	0.792481	4.18073e-05	0.000169901	P08553 1xPhospho [S769]	S769	3.47922	Nefm
P08553	QLsDIEER.P08553	QLsDIEER	0.840602	0	0	P08553 1xPhospho [S344]	S344	3.47922	Nefm
P08553	EEEPEAEksPVksPEAk.P08553	EEEPEAEksPVksPEAk	0.911278	2.81457e-06	2.10244e-05	P08553 2xPhospho [S502; S506]	S502	3.47922	Nefm
P08553	VTETRSsFSR.P08553	VTETRSsFSR	0.678195	0.00136819	0.0033888	P08553 1xPhospho [S23]	S23	3.47922	Nefm
P08553	AEsPVk.P08553	AEsPVk	0.897744	9.64874e-07	8.66545e-06	P08553 1xPhospho [S669]	S669	3.47922	Nefm
P08553	GVVTNGLDVsPAEEk.P08553	GVVTNGLDVsPAEEk	0.630075	0.00358436	0.0078165	P08553 1xPhospho [S769]	S769	3.47922	Nefm
P0C0A3	mHQVmsIEEVER.P0C0A3	mHQVmsIEEVER	0.622556	0.00410974	0.00879111	P0C0A3 1xPhospho [S119]	S119	-0.0239735	Chmp6
P0C7L0	AQLVsPPAPPTk.P0C7L0	AQLVsPPAPPTk	0.622556	0.00410974	0.00879111	P0C7L0 1xPhospho [S211]	S211	1.52568	Wipf3
P0C7L0	LNPPPAPPARsPTTELSSk.P0C7L0	LNPPPAPPARsPTTELSSk	0.0466165	0.846202	0.869102	P0C7L0 1xPhospho [S392]	S392	1.52568	Wipf3
P10637	IGsLDNITHVPGGGNkk.P10637	IGsLDNITHVPGGGNkk	0.810526	1.46396e-05	6.80768e-05	P10637 1xPhospho [S648]	S648	-0.771696	Mapt
P10637	TPPksPSASk.P10637	TPPksPSASk	0.908271	2.42476e-06	1.84047e-05	P10637 1xPhospho [S527]	S527	-0.771696	Mapt
P10637	tPPGSGEPPk.P10637	tPPGSGEPPk	0.335338	0.148467	0.198943	P10637 1xPhospho [T473]	T473	-0.771696	Mapt
P10637	IGsLDNITHVPGGGNk.P10637	IGsLDNITHVPGGGNk	0.753383	0.000191114	0.000630704	P10637 1xPhospho [S648]	S648	-0.771696	Mapt
P10637	GAAsPAQk.P10637	GAAsPAQk	0.858647	0	0	P10637 1xPhospho [S451]	S451	-0.771696	Mapt
P10637	SRtPSLPTPPTR.P10637	SRtPSLPTPPTR	0.556391	0.0120956	0.0223049	P10637 1xPhospho [T504]	T504	-0.771696	Mapt
P10637	sPSASk.P10637	sPSASk	0.631579	0.00348625	0.00764506	P10637 1xPhospho [S527]	S527	-0.771696	Mapt
P10637	IPAkTtPSPktPPGSGEPPkSGER.P10637	IPAkTtPSPktPPGSGEPPkSGER	0.559398	0.0115658	0.0214964	P10637 2xPhospho [T468; T473]	T468	-0.771696	Mapt
P11499	IEDVGsDEEDDSGkDkk.P11499	IEDVGsDEEDDSGkDkk	0.144361	0.542267	0.603573	P11499 1xPhospho [S255]	S255	-0.145409	Hsp90ab1
P11499	IEDVGsDEEDDSGk.P11499	IEDVGsDEEDDSGk	0.320301	0.168419	0.222011	P11499 1xPhospho [S255]	S255	-0.145409	Hsp90ab1
P11499	EIsDDEAEEEk.P11499	EIsDDEAEEEk	0.242105	0.302355	0.365404	P11499 1xPhospho [S226]	S226	-0.145409	Hsp90ab1
P11798	NFsGGk.P11798	NFsGGk	0.930827	4.91748e-06	2.99762e-05	P11798 1xPhospho [S314]	S314	5.81354	Camk2a
P11798	HPWIsHR.P11798	HPWIsHR	0.810526	1.46396e-05	6.80768e-05	P11798 1xPhospho [S272]	S272	5.81354	Camk2a
P11881	REsLTSFGNGPLSPGGPSkPGGGGGGPGSSSTSR.P11881	REsLTSFGNGPLSPGGPSkPGGGGGGPGSSSTSR	0.664662	0.00182457	0.00435858	P11881 1xPhospho [S1755]	S1755	3.02941	Itpr1
P12367	RVsVcAETFNPDEEEEDNDPRVVHPk.P12367	RVsVcAETFNPDEEEEDNDPRVVHPk	-0.169925	0.472187	0.535965	P12367 1xPhospho [S96]	S96	0.182211	Prkar2a
P12367	RVsVcAETFNPDEEEEDNDPR.P12367	RVsVcAETFNPDEEEEDNDPR	0.524812	0.0189528	0.0329365	P12367 1xPhospho [S96]	S96	0.182211	Prkar2a
P12382	RTLsIDkGF.P12382	RTLsIDkGF	0.84812	0	0	P12382 1xPhospho [S775]	S775	2.1516	Pfkl
P12382	TLsIDkGF.P12382	TLsIDkGF	0.902256	1.60549e-06	1.32088e-05	P12382 1xPhospho [S775]	S775	2.1516	Pfkl
P13595	TEEERtPNHDGGk.P13595	TEEERtPNHDGGk	0.884211	0	0	P13595 1xPhospho [T788]	T788	-0.595159	Ncam1
P13595	GPDPEPTQPGTVkNPPEAATAPAsPk.P13595	GPDPEPTQPGTVkNPPEAATAPAsPk	0.431579	0.0588075	0.0878565	P13595 1xPhospho [S1005]	S1005	-0.595159	Ncam1
P13595	QEAPSTkGPDPEPTQPGTVkNPPEAATAPAsPk.P13595	QEAPSTkGPDPEPTQPGTVkNPPEAATAPAsPk	-0.126316	0.594489	0.651528	P13595 1xPhospho [S1005]	S1005	-0.595159	Ncam1
P13595	tPNHDGGk.P13595	tPNHDGGk	0.675188	0.00146046	0.00355741	P13595 1xPhospho [T788]	T788	-0.595159	Ncam1
P13595	GVTASSSsPASAPk.P13595	GVTASSSsPASAPk	0.921805	4.04776e-06	2.66044e-05	P13595 1xPhospho [S887]	S887	-0.595159	Ncam1
P13595	NPPEAATAPAsPk.P13595	NPPEAATAPAsPk	0.183459	0.437084	0.501443	P13595 1xPhospho [S1005]	S1005	-0.595159	Ncam1
P13595	APPASkAsPAPTPTPAGAASPLAAVAAPATDAPQAk.P13595	APPASkAsPAPTPTPAGAASPLAAVAAPATDAPQAk	-0.0781955	0.743102	0.786558	P13595 1xPhospho [S946]	S946	-0.595159	Ncam1
P13595	NPPEAATAPAsPkSk.P13595	NPPEAATAPAsPkSk	-0.168421	0.476175	0.539451	P13595 1xPhospho [S1005]	S1005	-0.595159	Ncam1
P13595	DEskEPIVEVR.P13595	DEskEPIVEVR	0.590977	0.00706009	0.0140783	P13595 1xPhospho [S774]	S774	-0.595159	Ncam1
P14873	RSEsPFEGkNGk.P14873	RSEsPFEGkNGk	0.834586	0	0	P14873 1xPhospho [S1422]	S1422	-1.83423	Map1b
P14873	TPQASTYSYETSDRcYTTEkksPSEAR.P14873	TPQASTYSYETSDRcYTTEkksPSEAR	0.568421	0.0100891	0.019114	P14873 1xPhospho [S2068]	S2068	-1.83423	Map1b
P14873	EVSSkEEQsPVkAEVAEk.P14873	EVSSkEEQsPVkAEVAEk	0.56391	0.0108068	0.020359	P14873 1xPhospho [S614]	S614	-1.83423	Map1b
P14873	LGGDVsPTQIDVSQFGSFkEDTk.P14873	LGGDVsPTQIDVSQFGSFkEDTk	0.834586	0	0	P14873 1xPhospho [S1497]	S1497	-1.83423	Map1b
P14873	ksPSEARQDVDLcLVSScEFk.P14873	ksPSEARQDVDLcLVSScEFk	0.643609	0.00277821	0.00632218	P14873 1xPhospho [S2068]	S2068	-1.83423	Map1b
P14873	EEQsPVk.P14873	EEQsPVk	0.735338	0.00033065	0.00101304	P14873 1xPhospho [S614]	S614	-1.83423	Map1b
P14873	REsVVSGDDR.P14873	REsVVSGDDR	0.780451	7.156e-05	0.000271144	P14873 1xPhospho [S989]	S989	-1.83423	Map1b
P14873	QDVDLcLVSscEFkHPk.P14873	QDVDLcLVSscEFkHPk	0.76391	0.000134123	0.000461392	P14873 1xPhospho [S2083]	S2083	-1.83423	Map1b
P14873	tAkSRtPVQDHR.P14873	tAkSRtPVQDHR	0.879699	0	0	P14873 2xPhospho [T1624; T1629]	T1624	-1.83423	Map1b
P14873	DVSDERLsPAk.P14873	DVSDERLsPAk	0.884211	0	0	P14873 1xPhospho [S1247]	S1247	-1.83423	Map1b
P14873	QGFPDREsPVSDLTSTGLYQDk.P14873	QGFPDREsPVSDLTSTGLYQDk	0.678195	0.00136819	0.0033888	P14873 1xPhospho [S1438]	S1438	-1.83423	Map1b
P14873	FsPEVPGQk.P14873	FsPEVPGQk	0.750376	0.000210385	0.000690427	P14873 1xPhospho [S91]	S91	-1.83423	Map1b
P14873	TPQASTYsYETSDR.P14873	TPQASTYsYETSDR	0.577444	0.0087704	0.0169292	P14873 1xPhospho [S2054]	S2054	-1.83423	Map1b
P14873	ESVVsGDDR.P14873	ESVVsGDDR	0.83609	0	0	P14873 1xPhospho [S992]	S992	-1.83423	Map1b
P14873	tPLGER.P14873	tPLGER	0.879699	0	0	P14873 1xPhospho [T1265]	T1265	-1.83423	Map1b
P14873	QPGIQsPSR.P14873	QPGIQsPSR	0.861654	0	0	P14873 1xPhospho [S1073]	S1073	-1.83423	Map1b
P14873	TTRtPEVSGYTYEk.P14873	TTRtPEVSGYTYEk	0.864662	0	0	P14873 1xPhospho [T1962]	T1962	-1.83423	Map1b
P14873	LGGDVsPTQIDVSQFGSFk.P14873	LGGDVsPTQIDVSQFGSFk	0.771429	0.000102087	0.000367856	P14873 1xPhospho [S1497]	S1497	-1.83423	Map1b
P14873	SRtPVQDHR.P14873	SRtPVQDHR	0.87218	0	0	P14873 1xPhospho [T1629]	T1629	-1.83423	Map1b
P14873	GEAEQsEEEGEEEDk.P14873	GEAEQsEEEGEEEDk	0.637594	0.00311567	0.00694899	P14873 1xPhospho [S1013]	S1013	-1.83423	Map1b
P14873	SEsPFEGk.P14873	SEsPFEGk	0.873684	0	0	P14873 1xPhospho [S1422]	S1422	-1.83423	Map1b
P14873	DLTGQVPtPPVk.P14873	DLTGQVPtPPVk	0.790977	4.49369e-05	0.000180438	P14873 1xPhospho [T527]	T527	-1.83423	Map1b
P14873	ASAELDIkDVsDER.P14873	ASAELDIkDVsDER	0.227068	0.334123	0.398072	P14873 1xPhospho [S1242]	S1242	-1.83423	Map1b
P14873	GEAEQsEEEGEEEDkAEDAR.P14873	GEAEQsEEEGEEEDkAEDAR	0.433083	0.057859	0.0868253	P14873 1xPhospho [S1013]	S1013	-1.83423	Map1b
P14873	TPLGERsVNFSLTPNEIk.P14873	TPLGERsVNFSLTPNEIk	0.822556	4.73313e-06	2.94763e-05	P14873 1xPhospho [S1271]	S1271	-1.83423	Map1b
P14873	TTRtPEVSGYTYEkTER.P14873	TTRtPEVSGYTYEkTER	0.673684	0.00150847	0.00365544	P14873 1xPhospho [T1962]	T1962	-1.83423	Map1b
P14873	RSEsPFEGk.P14873	RSEsPFEGk	0.846617	0	0	P14873 1xPhospho [S1422]	S1422	-1.83423	Map1b
P14873	kEskEETPEVTk.P14873	kEskEETPEVTk	0.578947	0.00856506	0.016601	P14873 1xPhospho [S561]	S561	-1.83423	Map1b
P14873	tPVQDHR.P14873	tPVQDHR	0.884211	0	0	P14873 1xPhospho [T1629]	T1629	-1.83423	Map1b
P14873	DAYcsEEkELk.P14873	DAYcsEEkELk	0.145865	0.538014	0.59969	P14873 1xPhospho [S1225]	S1225	-1.83423	Map1b
P14873	ASAELDIkDVSDERLsPAk.P14873	ASAELDIkDVSDERLsPAk	0.717293	0.000540681	0.00152545	P14873 1xPhospho [S1247]	S1247	-1.83423	Map1b
P14873	AEtEEAEEPEEDGEDNASGSASk.P14873	AEtEEAEEPEEDGEDNASGSASk	0.6	0.00608027	0.01243	P14873 1xPhospho [T945]	T945	-1.83423	Map1b
P14873	TIktPEDGGYTcEITEk.P14873	TIktPEDGGYTcEITEk	0.861654	0	0	P14873 1xPhospho [T1928]	T1928	-1.83423	Map1b
P14873	TESkPSVTEkEVSSkEEQsPVkAEVAEk.P14873	TESkPSVTEkEVSSkEEQsPVkAEVAEk	0.542857	0.0147309	0.0264594	P14873 1xPhospho [S614]	S614	-1.83423	Map1b
P14873	SVNFSLtPNEIk.P14873	SVNFSLtPNEIk	0.837594	0	0	P14873 1xPhospho [T1277]	T1277	-1.83423	Map1b
P14873	tPEDGGYTcEITEk.P14873	tPEDGGYTcEITEk	0.882707	0	0	P14873 1xPhospho [T1928]	T1928	-1.83423	Map1b
P15864	kAsGPPVSELITk.P15864	kAsGPPVSELITk	0.47218	0.0370929	0.0596579	P15864 1xPhospho [S36]	S36	-1.22051	H1-2
P15864	RkAsGPPVSELITk.P15864	RkAsGPPVSELITk	0.406015	0.076843	0.111819	P15864 1xPhospho [S36]	S36	-1.22051	H1-2
P16054	ALsFDNR.P16054	ALsFDNR	0.157895	0.504569	0.566166	P16054 1xPhospho [S368]	S368	0.71438	Prkce
P16054	ALsFDNRGEEHR.P16054	ALsFDNRGEEHR	0.702256	0.00078778	0.00211603	P16054 1xPhospho [S368]	S368	0.71438	Prkce
P16054	kALsFDNRGEEHR.P16054	kALsFDNRGEEHR	0.661654	0.00194129	0.00460934	P16054 1xPhospho [S368]	S368	0.71438	Prkce
P16054	ASSATDGQLAsPGENGEVRPGQAk.P16054	ASSATDGQLAsPGENGEVRPGQAk	0.774436	9.10218e-05	0.000333605	P16054 1xPhospho [S388]	S388	0.71438	Prkce
P16283	FSIGsDEDDSPGLPVk.P16283	FSIGsDEDDSPGLPVk	0.809023	1.62733e-05	7.46413e-05	P16283 1xPhospho [S170]	S170	1.60984	Slc4a3
P16330	sHTFLPk.P16330	sHTFLPk	0.864662	0	0	P16330 1xPhospho [S9]	S9	7.67226	Cnp
P16330	ksHTFLPk.P16330	ksHTFLPk	0.562406	0.0110552	0.0207108	P16330 1xPhospho [S9]	S9	7.67226	Cnp
P16546	WRsLQQLAEER.P16546	WRsLQQLAEER	0.82406	3.83879e-06	2.58077e-05	P16546 1xPhospho [S1217]	S1217	1.09667	Sptan1
P16546	TAsPWk.P16546	TAsPWk	0.765414	0.000127184	0.000444012	P16546 1xPhospho [S1190]	S1190	1.09667	Sptan1
P16546	DEADSkTAsPWk.P16546	DEADSkTAsPWk	0.442105	0.0524142	0.0796709	P16546 1xPhospho [S1190]	S1190	1.09667	Sptan1
P16546	LDPAQSAsR.P16546	LDPAQSAsR	-0.55188	0.0129274	0.0236717	P16546 1xPhospho [S1031]	S1031	1.09667	Sptan1
P17182	YDLDFksPDDPSR.P17182	YDLDFksPDDPSR	0.618045	0.00445435	0.00944243	P17182 1xPhospho [S263]	S263	1.51476	Eno1
P18760	kSStPEEVk.P18760	kSStPEEVk	0.404511	0.0780217	0.113464	P18760 1xPhospho [T25]	T25	-1.13548	Cfl1
P18760	kSStPEEVkk.P18760	kSStPEEVkk	0.580451	0.00836368	0.0162777	P18760 1xPhospho [T25]	T25	-1.13548	Cfl1
P19096	SRsDTSLk.P19096	SRsDTSLk	0.610526	0.00508152	0.0106948	P19096 1xPhospho [S2201]	S2201	-1.91211	Fasn
P19246	SPAEAksPAEAk.P19246	SPAEAksPAEAk	0.75188	0.000200571	0.000660059	P19246 1xPhospho [S607]; 1xPhospho [S619]; 1xPhospho [S631]; 1xPhospho [S661]; 1xPhospho [S757]	S607	4.94628	Nefh
P19246	SPGEAksPSEAkSPAEAk.P19246	SPGEAksPSEAkSPAEAk	0.827068	2.24499e-06	1.72067e-05	P19246 1xPhospho [S595]; 1xPhospho [S649]	S595	4.94628	Nefh
P19246	SPAEAksPAEVk.P19246	SPAEAksPAEVk	0.795489	3.5997e-05	0.000148338	P19246 1xPhospho [S673]; 1xPhospho [S697]; 1xPhospho [S709]	S673	4.94628	Nefh
P19246	sPAEAk.P19246	sPAEAk	0.923308	4.20535e-06	2.74866e-05	P19246 1xPhospho [S535]; 1xPhospho [S571]; 1xPhospho [S601]; 1xPhospho [S607]; 1xPhospho [S613]; 1xPhospho [S619]; 1xPhospho [S625]; 1xPhospho [S631]; 1xPhospho [S655]; 1xPhospho [S661]; 1xPhospho [S667]; 1xPhospho [S691]; 1xPhospho [S703]; 1xPhospho [S727]; 1xPhospho [S751]; 1xPhospho [S757]; 1xPhospho [S783]	S535	4.94628	Nefh
P19246	SPAAVksPAEAk.P19246	SPAAVksPAEAk	0.840602	0	0	P19246 1xPhospho [S727]	S727	4.94628	Nefh
P19246	SPGEAksPGEAk.P19246	SPGEAksPGEAk	0.760902	0.000148858	0.00050543	P19246 1xPhospho [S529]; 1xPhospho [S547]; 1xPhospho [S745]	S529	4.94628	Nefh
P19246	SPAEAksPIEVk.P19246	SPAEAksPIEVk	0.869173	0	0	P19246 1xPhospho [S763]	S763	4.94628	Nefh
P19246	AksPEkEEAk.P19246	AksPEkEEAk	0.932331	5.04436e-06	3.05125e-05	P19246 1xPhospho [S867]	S867	4.94628	Nefh
P19246	SPAAVksPGEAk.P19246	SPAAVksPGEAk	0.903759	1.81463e-06	1.45728e-05	P19246 1xPhospho [S739]	S739	4.94628	Nefh
P19246	SPAEVksPGEAk.P19246	SPAEVksPGEAk	0.881203	0	0	P19246 1xPhospho [S679]; 1xPhospho [S715]	S679	4.94628	Nefh
P19246	TSVSSVSAsPSRFR.P19246	TSVSSVSAsPSRFR	0.26015	0.266813	0.328181	P19246 1xPhospho [S61]	S61	4.94628	Nefh
P19246	sPAEPk.P19246	sPAEPk	0.930827	4.91748e-06	2.99762e-05	P19246 1xPhospho [S559]; 1xPhospho [S565]; 1xPhospho [S577]; 1xPhospho [S685]	S559	4.94628	Nefh
P19246	SPAEPksPAEAk.P19246	SPAEPksPAEAk	0.481203	0.0332671	0.0542839	P19246 1xPhospho [S571]; 1xPhospho [S691]	S571	4.94628	Nefh
P19246	SPAEPksPATVk.P19246	SPAEPksPATVk	0.745865	0.000242084	0.000774997	P19246 1xPhospho [S583]	S583	4.94628	Nefh
P19246	SPAEAksPIEVkSPEk.P19246	SPAEAksPIEVkSPEk	0.857143	0	0	P19246 1xPhospho [S763]	S763	4.94628	Nefh
P19246	AktPVk.P19246	AktPVk	0.842105	0	0	P19246 1xPhospho [T775]	T775	4.94628	Nefh
P19246	sPGEAk.P19246	sPGEAk	0.87218	0	0	P19246 1xPhospho [S523]; 1xPhospho [S529]; 1xPhospho [S541]; 1xPhospho [S547]; 1xPhospho [S553]; 1xPhospho [S589]; 1xPhospho [S643]; 1xPhospho [S679]; 1xPhospho [S715]; 1xPhospho [S739]; 1xPhospho [S745]	S523	4.94628	Nefh
P19246	SPGEAksPAAVk.P19246	SPGEAksPAAVk	0.827068	2.24499e-06	1.72067e-05	P19246 1xPhospho [S721]	S721	4.94628	Nefh
P19246	sPAEVk.P19246	sPAEVk	0.83609	0	0	P19246 1xPhospho [S673]; 1xPhospho [S697]; 1xPhospho [S709]	S673	4.94628	Nefh
P19246	SPSEAksPAEAk.P19246	SPSEAksPAEAk	0.685714	0.00115823	0.00294949	P19246 1xPhospho [S601]; 1xPhospho [S655]	S601	4.94628	Nefh
P19246	SPATVksPGEAksPSEAk.P19246	SPATVksPGEAksPSEAk	0.833083	0	0	P19246 2xPhospho [S589; S595]; 2xPhospho [S643; S649]	S589	4.94628	Nefh
P19246	AksPEkEEAkTSEk.P19246	AksPEkEEAkTSEk	0.845113	0	0	P19246 1xPhospho [S867]	S867	4.94628	Nefh
P19246	VkEEAksPGEAk.P19246	VkEEAksPGEAk	0.890226	0	0	P19246 1xPhospho [S523]	S523	4.94628	Nefh
P19246	SPAEAksPAEAksPIEVkSPEk.P19246	SPAEAksPAEAksPIEVkSPEk	0.945865	5.94947e-06	3.30168e-05	P19246 2xPhospho [S757; S763]	S757	4.94628	Nefh
P19246	SPAEAksPATVk.P19246	SPAEAksPATVk	0.765414	0.000127184	0.000444012	P19246 1xPhospho [S637]	S637	4.94628	Nefh
P20357	VAIIRtPPk.P20357	VAIIRtPPk	0.642105	0.00285961	0.00644507	P20357 1xPhospho [T1650]	T1650	-0.2934	Map2
P20357	DGsPDAPATPEkEEVAFsEYk.P20357	DGsPDAPATPEkEEVAFsEYk	0.452632	0.0465754	0.0720052	P20357 2xPhospho [S1352; S1367]	S1352	-0.2934	Map2
P20357	RGVsGDREENSFSLNSSISSAR.P20357	RGVsGDREENSFSLNSSISSAR	0.714286	0.000584242	0.00162882	P20357 1xPhospho [S1560]	S1560	-0.2934	Map2
P20357	TPGtPGTPSYPR.P20357	TPGtPGTPSYPR	0.565414	0.0105631	0.0199477	P20357 1xPhospho [T1620]	T1620	-0.2934	Map2
P20357	VGsLDNAHHVPGGGNVk.P20357	VGsLDNAHHVPGGGNVk	0.548872	0.0135073	0.0245616	P20357 1xPhospho [S1743]	S1743	-0.2934	Map2
P20357	TTRsEPIRR.P20357	TTRsEPIRR	0.769925	0.000107978	0.00038613	P20357 1xPhospho [S1583]	S1583	-0.2934	Map2
P20357	EAsPPTSADk.P20357	EAsPPTSADk	0.369925	0.109091	0.151799	P20357 1xPhospho [S938]	S938	-0.2934	Map2
P20357	IStPERk.P20357	IStPERk	0.562406	0.0110552	0.0207108	P20357 1xPhospho [T1445]	T1445	-0.2934	Map2
P20357	APHWTSASLTEAAAHPHsPEmk.P20357	APHWTSASLTEAAAHPHsPEmk	0.651128	0.00239933	0.00554036	P20357 1xPhospho [S28]	S28	-0.2934	Map2
P20357	SSVAsPRR.P20357	SSVAsPRR	0.541353	0.0150505	0.0269717	P20357 1xPhospho [S1791]	S1791	-0.2934	Map2
P20357	GVsGDREENSFSLNSSISSAR.P20357	GVsGDREENSFSLNSSISSAR	0.73985	0.000290025	0.000905078	P20357 1xPhospho [S1560]	S1560	-0.2934	Map2
P20357	kSEVQAHsPSR.P20357	kSEVQAHsPSR	0.661654	0.00194129	0.00460934	P20357 1xPhospho [S1485]	S1485	-0.2934	Map2
P20357	SSVAsPR.P20357	SSVAsPR	0.502256	0.0255532	0.0429783	P20357 1xPhospho [S1791]	S1791	-0.2934	Map2
P20444	VIsPSEDRkQPSNNLDR.P20444	VIsPSEDRkQPSNNLDR	0.726316	0.000425399	0.00124498	P20444 1xPhospho [S319]	S319	0.984412	Prkca
P20444	VIsPSEDR.P20444	VIsPSEDR	0.502256	0.0255532	0.0429783	P20444 1xPhospho [S319]	S319	0.984412	Prkca
P21619	RLETEDTSGsPSR.P21619	RLETEDTSGsPSR	0.81203	1.31022e-05	6.26616e-05	P21619 1xPhospho [S427]	S427	-0.797014	Lmnb2
P21619	LETEDTSGsPSR.P21619	LETEDTSGsPSR	0.854135	0	0	P21619 1xPhospho [S427]	S427	-0.797014	Lmnb2
P24529	MPTPSASsPQPk.P24529	MPTPSASsPQPk	0.578947	0.00856506	0.016601	P24529 1xPhospho [S8]; 1xMet-loss [N-Term]	S8	2.05995	Th
P24529	AVsEQDTk.P24529	AVsEQDTk	0.806015	1.98455e-05	8.86081e-05	P24529 1xPhospho [S19]	S19	2.05995	Th
P24529	RAVsEQDTk.P24529	RAVsEQDTk	0.741353	0.000277397	0.000867972	P24529 1xPhospho [S19]	S19	2.05995	Th
P24529	QAEAVTsPR.P24529	QAEAVTsPR	0.849624	0	0	P24529 1xPhospho [S31]	S31	2.05995	Th
P26645	TAAkGEATAERPGEAAVASsPSk.P26645	TAAkGEATAERPGEAAVASsPSk	0.760902	0.000148858	0.00050543	P26645 1xPhospho [S27]	S27	-1.76111	Marcks
P26645	LSGFsFkk.P26645	LSGFsFkk	0.87218	0	0	P26645 1xPhospho [S163]	S163	-1.76111	Marcks
P26645	LSGFsFk.P26645	LSGFsFk	0.896241	7.48063e-07	6.90272e-06	P26645 1xPhospho [S163]	S163	-1.76111	Marcks
P26645	GEATAERPGEAAVASsPSk.P26645	GEATAERPGEAAVASsPSk	0.670677	0.00160839	0.00388157	P26645 1xPhospho [S27]	S27	-1.76111	Marcks
P27546	SAsADLSR.P27546	SAsADLSR	0.580451	0.00836368	0.0162777	P27546 1xPhospho [S828]	S828	-3.47977	Map4
P27546	TtPTVSk.P27546	TtPTVSk	0.888722	0	0	P27546 1xPhospho [T777]	T777	-3.47977	Map4
P27546	AAVGVTGNDITTPPNkEPPPsPEk.P27546	AAVGVTGNDITTPPNkEPPPsPEk	0.742857	0.000265205	0.000836499	P27546 1xPhospho [S667]	S667	-3.47977	Map4
P27546	EPPPsPEk.P27546	EPPPsPEk	0.679699	0.00132389	0.00329641	P27546 1xPhospho [S667]	S667	-3.47977	Map4
P27546	ATsPSTLVSTGPSSR.P27546	ATsPSTLVSTGPSSR	0.911278	2.81457e-06	2.10244e-05	P27546 1xPhospho [S785]	S785	-3.47977	Map4
P27546	DmsPLPESEVTLGk.P27546	DmsPLPESEVTLGk	0.891729	9.31678e-08	9.28915e-07	P27546 1xPhospho [S475]	S475	-3.47977	Map4
P27546	DmsPSAETEAPLAk.P27546	DmsPSAETEAPLAk	0.92782	4.64804e-06	2.94763e-05	P27546 1xPhospho [S517]	S517	-3.47977	Map4
P27546	VGsLDNVGHLPAGGAVk.P27546	VGsLDNVGHLPAGGAVk	0.793985	3.88291e-05	0.000159729	P27546 1xPhospho [S1046]	S1046	-3.47977	Map4
P27546	AAEQmSTLPIDAPsPLENLEQk.P27546	AAEQmSTLPIDAPsPLENLEQk	0.852632	0	0	P27546 1xPhospho [S617]	S617	-3.47977	Map4
P27546	LATTVsAPDLk.P27546	LATTVsAPDLk	0.893233	3.11792e-07	3.00675e-06	P27546 1xPhospho [S901]	S901	-3.47977	Map4
P27671	RAPsPk.P27671	RAPsPk	0.875188	0	0	P27671 1xPhospho [S78]	S78	2.20297	Rasgrf1
P28028	SAsEPSLNR.P28028	SAsEPSLNR	0.803008	2.38516e-05	0.000103167	P28028 1xPhospho [S766]	S766	2.18591	NA
P28028	NNPksPQkPIVR.P28028	NNPksPQkPIVR	0.803008	2.38516e-05	0.000103167	P28028 1xPhospho [S135]	S135	2.18591	NA
P28652	NSSAITsPk.P28652	NSSAITsPk	0.574436	0.00919321	0.0176297	P28652 1xPhospho [S367]	S367	1.15742	Camk2b
P28667	GDVTAEEAAGAsPAk.P28667	GDVTAEEAAGAsPAk	0.917293	3.54614e-06	2.4256e-05	P28667 1xPhospho [S22]	S22	-3.84902	Marcksl1
P28667	LSGLsFk.P28667	LSGLsFk	0.954887	6.32144e-06	3.38235e-05	P28667 1xPhospho [S104]	S104	-3.84902	Marcksl1
P28667	GEVAPkEtPk.P28667	GEVAPkEtPk	0.827068	2.24499e-06	1.72067e-05	P28667 1xPhospho [T85]	T85	-3.84902	Marcksl1
P28667	LSGLsFkR.P28667	LSGLsFkR	0.957895	6.40648e-06	3.38235e-05	P28667 1xPhospho [S104]	S104	-3.84902	Marcksl1
P28667	SNGDLtPk.P28667	SNGDLtPk	0.682707	0.00123879	0.00311087	P28667 1xPhospho [T41]	T41	-3.84902	Marcksl1
P28741	sAkPETVIDSLLQ.P28741	sAkPETVIDSLLQ	0.639098	0.0030283	0.00678628	P28741 1xPhospho [S689]	S689	-1.30686	Kif3a
P30999	HYEDGYPGGSDNYGsLSR.P30999	HYEDGYPGGSDNYGsLSR	-0.0616541	0.796687	0.83131	P30999 1xPhospho [S230]	S230	-0.193055	Ctnnd1
P30999	GSLAsLDSLR.P30999	GSLAsLDSLR	0.796992	3.33058e-05	0.00013773	P30999 1xPhospho [S349]	S349	-0.193055	Ctnnd1
P31324	RAsVcAEAYNPDEEEDDAESR.P31324	RAsVcAEAYNPDEEEDDAESR	0.458647	0.0434755	0.0678817	P31324 1xPhospho [S112]	S112	-0.337608	Prkar2b
P31324	GVNFAEEPmRSDsENGEEEEAAEAGAFNAPVINR.P31324	GVNFAEEPmRSDsENGEEEEAAEAGAFNAPVINR	0.523308	0.0193447	0.0335185	P31324 1xPhospho [S85]	S85	-0.337608	Prkar2b
P33173	VTGVYELSLcHVADAGsPGmQR.P33173	VTGVYELSLcHVADAGsPGmQR	0.342857	0.139151	0.18742	P33173 1xPhospho [S1342]	S1342	-0.344762	Kif1a
P33173	DVLsPLRPSR.P33173	DVLsPLRPSR	-0.198496	0.399796	0.465242	P33173 1xPhospho [S1093]	S1093	-0.344762	Kif1a
P33173	DPSmSPLGAAtLTPSSTcPSLIEGR.P33173	DPSmSPLGAAtLTPSSTcPSLIEGR	0.0556391	0.816412	0.845146	P33173 1xPhospho [T1506]	T1506	-0.344762	Kif1a
P33173	SGTsQEELR.P33173	SGTsQEELR	-0.577444	0.0087704	0.0169292	P33173 1xPhospho [S937]	S937	-0.344762	Kif1a
P33173	DVLsPLRPSRR.P33173	DVLsPLRPSRR	0.377444	0.101666	0.142393	P33173 1xPhospho [S1093]	S1093	-0.344762	Kif1a
P34152	LQPQEIsPPPTANLDR.P34152	LQPQEIsPPPTANLDR	0.198496	0.399796	0.465242	P34152 1xPhospho [S910]	S910	1.04526	Ptk2
P34152	YmEDSTyYk.P34152	YmEDSTyYk	0.834586	0	0	P34152 1xPhospho [Y576]	Y576	1.04526	Ptk2
P35235	VyENVGLmQQQR.P35235	VyENVGLmQQQR	-0.204511	0.3854	0.451167	P35235 1xPhospho [Y584]	Y584	0.358018	Ptpn11
P35283	RPAGGSLGAVsPALSGGQAR.P35283	RPAGGSLGAVsPALSGGQAR	0.4	0.0816402	0.11807	P35283 1xPhospho [S20]	S20	-0.275704	Rab12
P35564	AEEDEILNRsPR.P35564	AEEDEILNRsPR	0.593985	0.00672003	0.0135379	P35564 1xPhospho [S582]	S582	-0.240095	Canx
P35802	SkEEQELHDIHSTRsk.P35802	SkEEQELHDIHSTRsk	0.873684	0	0	P35802 1xPhospho [S270]	S270	1.48672	Gpm6a
P35802	SkEEQELHDIHSTRskER.P35802	SkEEQELHDIHSTRskER	0.969925	6.56775e-06	3.38235e-05	P35802 1xPhospho [S270]	S270	1.48672	Gpm6a
P35803	AkEEQELQDIQsR.P35803	AkEEQELQDIQsR	-0.309774	0.18346	0.238366	P35803 1xPhospho [S318]	S318	1.14804	Gpm6b
P35831	kVPLQEGPksFDGNTLLNR.P35831	kVPLQEGPksFDGNTLLNR	0.768421	0.00011412	0.000406855	P35831 1xPhospho [S448]	S448	-1.79595	Ptpn12
P35831	NLsFEIk.P35831	NLsFEIk	0.819549	6.73162e-06	3.38451e-05	P35831 1xPhospho [S434]	S434	-1.79595	Ptpn12
P35831	TPsQDSDYINANFIk.P35831	TPsQDSDYINANFIk	0.201504	0.39256	0.458865	P35831 1xPhospho [S83]	S83	-1.79595	Ptpn12
P39053	kTsGNQDEILVIR.P39053	kTsGNQDEILVIR	0.93985	5.59971e-06	3.20587e-05	P39053 1xPhospho [S512]	S512	4.03261	Dnm1
P39447	VQIPVSHPDPEPVsDNEDDSYDEEVHDPR.P39447	VQIPVSHPDPEPVsDNEDDSYDEEVHDPR	-0.380451	0.0988034	0.138963	P39447 1xPhospho [S125]	S125	0.121834	Tjp1
P39447	EIsQDSLAAR.P39447	EIsQDSLAAR	0.595489	0.00655513	0.013251	P39447 1xPhospho [S212]	S212	0.121834	Tjp1
P39688	LTEERDGsLNQSSGYR.P39688	LTEERDGsLNQSSGYR	0.735338	0.00033065	0.00101304	P39688 1xPhospho [S21]	S21	-0.886139	Fyn
P39688	DGsLNQSSGYR.P39688	DGsLNQSSGYR	0.523308	0.0193447	0.0335185	P39688 1xPhospho [S21]	S21	-0.886139	Fyn
P42208	IYHLPDAEsDEDEDFkEQTR.P42208	IYHLPDAEsDEDEDFkEQTR	0.806015	1.98455e-05	8.86081e-05	P42208 1xPhospho [S218]	S218	0.0853421	Septin2
P42859	RHsLScTk.P42859	RHsLScTk	0.876692	0	0	P42859 1xPhospho [S1841]	S1841	1.34978	Htt
P43006	SADcsVEEEPWkR.P43006	SADcsVEEEPWkR	0.924812	4.35797e-06	2.83268e-05	P43006 1xPhospho [S562]	S562	4.53652	Slc1a2
P43006	TQsIYDDkNHR.P43006	TQsIYDDkNHR	0.619549	0.00433693	0.00921843	P43006 1xPhospho [S520]	S520	4.53652	Slc1a2
P46096	DDDAETGLtDGEEk.P46096	DDDAETGLtDGEEk	0.538346	0.0157066	0.0280407	P46096 1xPhospho [T128]	T128	3.68474	Syt1
P46460	EEGAsPLDFD.P46460	EEGAsPLDFD	0.506767	0.024104	0.0408327	P46460 1xPhospho [S739]	S739	3.12553	Nsf
P46460	TkENRQsIINPDWNFEk.P46460	TkENRQsIINPDWNFEk	0.422556	0.0647536	0.0960083	P46460 1xPhospho [S207]	S207	3.12553	Nsf
P46660	GANEsLER.P46660	GANEsLER	0.684211	0.00119796	0.00303423	P46660 1xPhospho [S335]	S335	2.17069	Ina
P46660	VFGDSSRLsAR.P46660	VFGDSSRLsAR	0.778947	7.61096e-05	0.000286537	P46660 1xPhospho [S26]	S26	2.17069	Ina
P46660	LSGPGGSGsFR.P46660	LSGPGGSGsFR	0.884211	0	0	P46660 1xPhospho [S37]	S37	2.17069	Ina
P46935	RQIsEDVDGPDNR.P46935	RQIsEDVDGPDNR	0.445113	0.0506908	0.0773511	P46935 1xPhospho [S309]	S309	-2.31422	Nedd4
P46935	RPSPDDDLtDEDNDDmQLQAQR.P46935	RPSPDDDLtDEDNDDmQLQAQR	0.894737	5.30234e-07	5.07171e-06	P46935 1xPhospho [T287]	T287	-2.31422	Nedd4
P47708	WHQLQNENHVSsD.P47708	WHQLQNENHVSsD	0.753383	0.000191114	0.000630704	P47708 1xPhospho [S680]	S680	4.19091	Rph3a
P47708	DSEGWDHAHGGGTGDTSRsPAGLRR.P47708	DSEGWDHAHGGGTGDTSRsPAGLRR	0.706767	0.000705645	0.00192174	P47708 1xPhospho [S262]	S262	4.19091	Rph3a
P47708	sPAGLR.P47708	sPAGLR	0.595489	0.00655513	0.013251	P47708 1xPhospho [S262]	S262	4.19091	Rph3a
P47809	THsIESSGk.P47809	THsIESSGk	0.754887	0.000182006	0.000607462	P47809 1xPhospho [S78]	S78	0.984349	Map2k4
P47941	YPsPPVGSVSAPNLPTAEENLEYVR.P47941	YPsPPVGSVSAPNLPTAEENLEYVR	0.360902	0.118522	0.162803	P47941 1xPhospho [S107]	S107	-0.133424	Crkl
P48453	IcsFEEAkGLDR.P48453	IcsFEEAkGLDR	0.601504	0.00592843	0.0121831	P48453 1xPhospho [S479]	S479	0.425903	Ppp3cb
P48453	IcsFEEAk.P48453	IcsFEEAk	0.568421	0.0100891	0.019114	P48453 1xPhospho [S479]	S479	0.425903	Ppp3cb
P48678	LRLsPSPTSQR.P48678	LRLsPSPTSQR	0.741353	0.000277397	0.000867972	P48678 1xPhospho [S390]	S390	-0.479127	Lmna
P48678	LSPsPTSQR.P48678	LSPsPTSQR	0.380451	0.0988034	0.138963	P48678 1xPhospho [S392]	S392	-0.479127	Lmna
P48722	LHGRsFDDPIVQTER.P48722	LHGRsFDDPIVQTER	0.807519	1.80072e-05	8.10153e-05	P48722 1xPhospho [S74]	S74	1.82356	Hspa4l
P48722	cHAEHtPEEEIDHTGAk.P48722	cHAEHtPEEEIDHTGAk	0.902256	1.60549e-06	1.32088e-05	P48722 1xPhospho [T545]	T545	1.82356	Hspa4l
P49025	EksPGR.P49025	EksPGR	0.842105	0	0	P49025 1xPhospho [S2009]	S2009	1.82042	Cit
P49025	DksPGRPLER.P49025	DksPGRPLER	0.855639	0	0	P49025 1xPhospho [S1999]	S1999	1.82042	Cit
P49025	ERsPGRLFEDSSR.P49025	ERsPGRLFEDSSR	0.46015	0.0427264	0.0670235	P49025 1xPhospho [S2021]	S2021	1.82042	Cit
P49025	RVsEVEAVLSQk.P49025	RVsEVEAVLSQk	0.882707	0	0	P49025 1xPhospho [S479]	S479	1.82042	Cit
P49312	SEsPkEPEQLR.P49312	SEsPkEPEQLR	0.711278	0.00063059	0.00173745	P49312 1xPhospho [S6]	S6	-2.29311	Hnrnpa1
P49312	SEsPkEPEQLRk.P49312	SEsPkEPEQLRk	0.732331	0.000360143	0.00108504	P49312 1xPhospho [S6]	S6	-2.29311	Hnrnpa1
P51830	LNVSksV.P51830	LNVSksV	0.918797	3.71805e-06	2.53582e-05	P51830 1xPhospho [S1352]	S1352	2.21509	Adcy9
P52734	SLsLDPGQSLEPHPEGPQR.P52734	SLsLDPGQSLEPHPEGPQR	0.467669	0.0391321	0.0624256	P52734 1xPhospho [S116]	S116	-1.3887	Fgd1
P52795	AAALSLSTLAsPk.P52795	AAALSLSTLAsPk	0.121805	0.607873	0.663108	P52795 1xPhospho [S286]	S286	-0.764391	Efnb1
P54227	SkESVPDFPLsPPk.P54227	SkESVPDFPLsPPk	0.747368	0.000231131	0.000748075	P54227 1xPhospho [S38]	S38	-3.74914	Stmn1
P54227	ASGQAFELILsPR.P54227	ASGQAFELILsPR	0.921805	4.04776e-06	2.66044e-05	P54227 1xPhospho [S25]	S25	-3.74914	Stmn1
P54285	VEEHsPLER.P54285	VEEHsPLER	0.709774	0.000654853	0.00179171	P54285 1xPhospho [S393]	S393	1.12116	Cacnb3
P54285	RsPPPSLAk.P54285	RsPPPSLAk	0.246617	0.293205	0.355808	P54285 1xPhospho [S152]	S152	1.12116	Cacnb3
P54285	SGNPSSLGDIGNRRsPPPSLAk.P54285	SGNPSSLGDIGNRRsPPPSLAk	0.849624	0	0	P54285 1xPhospho [S152]	S152	1.12116	Cacnb3
P55821	TLAsPk.P55821	TLAsPk	0.748872	0.000220568	0.000720829	P55821 1xPhospho [S73]	S73	-3.84536	Stmn2
P55821	RAsGQAFELILkPPsPISEAPR.P55821	RAsGQAFELILkPPsPISEAPR	0.700752	0.00081682	0.00217418	P55821 2xPhospho [S50; S62]	S50	-3.84536	Stmn2
P55821	RksQEAQVLk.P55821	RksQEAQVLk	0.667669	0.00171368	0.00412299	P55821 1xPhospho [S97]	S97	-3.84536	Stmn2
P55821	NkELQVELsG.P55821	NkELQVELsG	0.894737	5.30234e-07	5.07171e-06	P55821 1xPhospho [S178]	S178	-3.84536	Stmn2
P56399	ATNNsLER.P56399	ATNNsLER	0.720301	0.000499772	0.00142541	P56399 1xPhospho [S751]	S751	0.58618	Usp5
P56695	LVsSESk.P56695	LVsSESk	0.553383	0.0126451	0.0232453	P56695 1xPhospho [S236]	S236	1.26923	Wfs1
P58871	DRQsPSTcSEGLLGWAQk.P58871	DRQsPSTcSEGLLGWAQk	-0.366917	0.112171	0.155258	P58871 1xPhospho [S713]	S713	0.170217	Tnks1bp1
P58871	NRsAEEGEVTESk.P58871	NRsAEEGEVTESk	0.239098	0.308552	0.371748	P58871 1xPhospho [S1657]	S1657	0.170217	Tnks1bp1
P58871	SSGSLsPGLETEDPLEAR.P58871	SSGSLsPGLETEDPLEAR	0.642105	0.00285961	0.00644507	P58871 1xPhospho [S1375]	S1375	0.170217	Tnks1bp1
P58871	SQEGTAEIPAEcQEEHSktPEER.P58871	SQEGTAEIPAEcQEEHSktPEER	0.478195	0.0345058	0.0561883	P58871 1xPhospho [T238]	T238	0.170217	Tnks1bp1
P58871	VSGAGLsPSR.P58871	VSGAGLsPSR	0.0992481	0.676587	0.727609	P58871 1xPhospho [S1131]	S1131	0.170217	Tnks1bp1
P58871	ENYEDQEPLVGHEsPITLAAR.P58871	ENYEDQEPLVGHEsPITLAAR	0.207519	0.378315	0.44531	P58871 1xPhospho [S602]	S602	0.170217	Tnks1bp1
P58871	DVGHLEEGASGGLLsPSTPHSR.P58871	DVGHLEEGASGGLLsPSTPHSR	0.321805	0.166343	0.219398	P58871 1xPhospho [S1022]	S1022	0.170217	Tnks1bp1
P58871	RFsEGVLQPPSQDQEk.P58871	RFsEGVLQPPSQDQEk	0.803008	2.38516e-05	0.000103167	P58871 1xPhospho [S429]	S429	0.170217	Tnks1bp1
P59017	kksHTGEAAAVR.P59017	kksHTGEAAAVR	0.321805	0.166343	0.219398	P59017 1xPhospho [S387]	S387	0.160271	Bcl2l13
P59281	ASLtPVkAEADLVR.P59281	ASLtPVkAEADLVR	-0.103759	0.662617	0.713565	P59281 1xPhospho [T530]	T530	0.0840714	Arhgap39
P59281	AFsEDEALAQQDSk.P59281	AFsEDEALAQQDSk	0.666165	0.00176841	0.00423733	P59281 1xPhospho [S597]	S597	0.0840714	Arhgap39
P59281	RPSGSQHsPNLQTFVPDTDGTVFFPER.P59281	RPSGSQHsPNLQTFVPDTDGTVFFPER	-0.503759	0.0250626	0.0422437	P59281 1xPhospho [S247]	S247	0.0840714	Arhgap39
P59281	FLsLEYSPVGk.P59281	FLsLEYSPVGk	0.27218	0.244681	0.303497	P59281 1xPhospho [S380]	S380	0.0840714	Arhgap39
P59281	QNTEsPR.P59281	QNTEsPR	0.687218	0.00111959	0.00287598	P59281 1xPhospho [S115]	S115	0.0840714	Arhgap39
P59281	ASADNsPGR.P59281	ASADNsPGR	0.535338	0.0163857	0.0289891	P59281 1xPhospho [S123]	S123	0.0840714	Arhgap39
P59644	AQAFSDPRLsPSFR.P59644	AQAFSDPRLsPSFR	-0.075188	0.752766	0.795713	P59644 1xPhospho [S279]	S279	2.06416	Inpp5j
P59644	SPsPQSR.P59644	SPsPQSR	0.693233	0.000975399	0.00254447	P59644 1xPhospho [S911]	S911	2.06416	Inpp5j
P59764	AsPLLSDk.P59764	AsPLLSDk	0.416541	0.0689674	0.101679	P59764 1xPhospho [S1709]	S1709	0.52028	Dock4
P60335	QIcLVmLETLSQsPQGR.P60335	QIcLVmLETLSQsPQGR	0.381955	0.0973949	0.13764	P60335 1xPhospho [S173]	S173	-0.923806	Pcbp1
P60469	GEGPAVPGDtPPPTPR.P60469	GEGPAVPGDtPPPTPR	0.819549	6.73162e-06	3.38451e-05	P60469 1xPhospho [T714]	T714	0.854599	Ppfia3
P60469	sLPGSALELR.P60469	sLPGSALELR	0.297744	0.20176	0.258714	P60469 1xPhospho [S508]	S508	0.854599	Ppfia3
P60469	VSSSGLDsLGRYR.P60469	VSSSGLDsLGRYR	-0.120301	0.612362	0.667696	P60469 1xPhospho [S645]	S645	0.854599	Ppfia3
P60469	RGsALGPDEAGGELER.P60469	RGsALGPDEAGGELER	0.726316	0.000425399	0.00124498	P60469 1xPhospho [S17]	S17	0.854599	Ppfia3
P60469	SAAAGALGsPGLPLRk.P60469	SAAAGALGsPGLPLRk	0.148872	0.529556	0.591664	P60469 1xPhospho [S1164]	S1164	0.854599	Ppfia3
P60469	LAPPsPAR.P60469	LAPPsPAR	0.726316	0.000425399	0.00124498	P60469 1xPhospho [S683]	S683	0.854599	Ppfia3
P60469	YSQAPTLPSGAPLDPYGAGsGR.P60469	YSQAPTLPSGAPLDPYGAGsGR	0.0315789	0.896294	0.912583	P60469 1xPhospho [S537]	S537	0.854599	Ppfia3
P60469	LAPPsPAREGTDk.P60469	LAPPsPAREGTDk	0.700752	0.00081682	0.00217418	P60469 1xPhospho [S683]	S683	0.854599	Ppfia3
P60469	EGTDkTNHVSkEEAGVPRGEGPAVPGDtPPPTPR.P60469	EGTDkTNHVSkEEAGVPRGEGPAVPGDtPPPTPR	0.165414	0.484202	0.545917	P60469 1xPhospho [T714]	T714	0.854599	Ppfia3
P60469	QAQsPGGVSSEVEVLk.P60469	QAQsPGGVSSEVEVLk	0.658647	0.00206409	0.00485681	P60469 1xPhospho [S142]	S142	0.854599	Ppfia3
P60761	GGAGGGPsGD.P60761	GGAGGGPsGD	0.557895	0.0118283	0.0219496	P60761 1xPhospho [S76]	S76	1.66224	Nrgn
P60840	SsLVTSk.P60840	SsLVTSk	0.685714	0.00115823	0.00294949	P60840 1xPhospho [S109]	S109	1.67406	Ensa
P60840	YFDsGDYNmAk.P60840	YFDsGDYNmAk	0.154887	0.512833	0.574343	P60840 1xPhospho [S67]	S67	1.67406	Ensa
P60853	ALSFsDGGSk.P60853	ALSFsDGGSk	0.0857143	0.71911	0.765987	P60853 1xPhospho [S233]	S233	0.160228	Lzts1
P61264	DsDDEEEVVHVDR.P61264	DsDDEEEVVHVDR	0.521805	0.0197431	0.0341335	P61264 1xPhospho [S14]	S14	2.12272	Stx1b
P61264	SAkDsDDEEEVVHVDR.P61264	SAkDsDDEEEVVHVDR	0.780451	7.156e-05	0.000271144	P61264 1xPhospho [S14]	S14	2.12272	Stx1b
P61329	VVNQDsT.P61329	VVNQDsT	0.905263	2.02107e-06	1.60121e-05	P61329 1xPhospho [S242]	S242	1.58929	Fgf12
P61979	DYDDmsPR.P61979	DYDDmsPR	0.818045	7.84202e-06	3.89288e-05	P61979 1xPhospho [S284]	S284	-1.65698	Hnrnpk
P62071	FQEQEcPPsPEPTR.P62071	FQEQEcPPsPEPTR	-0.249624	0.287203	0.349426	P62071 1xPhospho [S186]	S186	0.096586	Rras2
P62071	kFQEQEcPPsPEPTRk.P62071	kFQEQEcPPsPEPTRk	0.720301	0.000499772	0.00142541	P62071 1xPhospho [S186]	S186	0.096586	Rras2
P62071	FQEQEcPPsPEPTRk.P62071	FQEQEcPPsPEPTRk	0.762406	0.000141345	0.000484817	P62071 1xPhospho [S186]	S186	0.096586	Rras2
P62484	TTPPTQkPPsPPmSGk.P62484	TTPPTQkPPsPPmSGk	0.455639	0.0450045	0.0699905	P62484 1xPhospho [S177]	S177	0.58445	Abi2
P62484	HTPPTIGGsLPYR.P62484	HTPPTIGGsLPYR	-0.348872	0.132007	0.17913	P62484 1xPhospho [S301]	S301	0.58445	Abi2
P62484	GTLGRHsPYR.P62484	GTLGRHsPYR	-0.633083	0.00339037	0.0074696	P62484 1xPhospho [S190]	S190	0.58445	Abi2
P62996	RPHtPTPGIYmGRPTYGSSR.P62996	RPHtPTPGIYmGRPTYGSSR	0.78797	5.16723e-05	0.000203319	P62996 1xPhospho [T201]	T201	-2.21839	Tra2b
P63085	VADPDHDHTGFLTEyVATR.P63085	VADPDHDHTGFLTEyVATR	0.428571	0.0607406	0.090572	P63085 1xPhospho [Y185]	Y185	0.947562	Mapk1
P63101	VVsSIEQk.P63101	VVsSIEQk	-0.126316	0.594489	0.651528	P63101 1xPhospho [S63]	S63	0.575848	Ywhaz
P63213	EDPLLtPVPASENPFR.P63213	EDPLLtPVPASENPFR	0.784962	5.90806e-05	0.00022827	P63213 1xPhospho [T52]	T52	-0.65125	Gng2
P63216	mkGEtPVNSTmSIGQAR.P63216	mkGEtPVNSTmSIGQAR	-0.475188	0.0357808	0.0579039	P63216 1xPhospho [T5]	T5	1.58296	Gng3
P63318	RGsDELYAIk.P63318	RGsDELYAIk	0.741353	0.000277397	0.000867972	P63318 1xPhospho [S373]	S373	3.78804	Prkcg
P63318	SVPsLcGVDHTER.P63318	SVPsLcGVDHTER	-0.580451	0.00836368	0.0162777	P63318 1xPhospho [S148]	S148	3.78804	Prkcg
P63318	mGPSSSPIPSPSPsPTDSk.P63318	mGPSSSPIPSPSPsPTDSk	0.726316	0.000425399	0.00124498	P63318 1xPhospho [S330]	S330	3.78804	Prkcg
P63318	AAPALtPPDR.P63318	AAPALtPPDR	0.712782	0.000607059	0.00168643	P63318 1xPhospho [T655]	T655	3.78804	Prkcg
P63328	QTLQSATVEAIEADEAIkGFsPQHk.P63328	QTLQSATVEAIEADEAIkGFsPQHk	0.929323	4.78536e-06	2.94763e-05	P63328 1xPhospho [S462]	S462	2.99439	Ppp3ca
P63328	ITsFEEAk.P63328	ITsFEEAk	0.962406	6.49947e-06	3.38235e-05	P63328 1xPhospho [S469]	S469	2.99439	Ppp3ca
P63328	GFsPQHk.P63328	GFsPQHk	0.869173	0	0	P63328 1xPhospho [S462]	S462	2.99439	Ppp3ca
P63328	ITsFEEAkGLDR.P63328	ITsFEEAkGLDR	0.891729	9.31678e-08	9.28915e-07	P63328 1xPhospho [S469]	S469	2.99439	Ppp3ca
P68404	QPVELtPTDk.P68404	QPVELtPTDk	0.902256	1.60549e-06	1.32088e-05	P68404 1xPhospho [T642]	T642	2.34226	Prkcb
P68404	LIPDPksESk.P68404	LIPDPksESk	0.911278	2.81457e-06	2.10244e-05	P68404 1xPhospho [S206]	S206	2.34226	Prkcb
P70175	GVTSNTsDSESSSk.P70175	GVTSNTsDSESSSk	0.0300752	0.901328	0.916915	P70175 1xPhospho [S632]	S632	1.0486	Dlg3
P70188	RDsLPGk.P70188	RDsLPGk	0.330827	0.154266	0.205659	P70188 1xPhospho [S102]	S102	-1.07329	Kifap3
P70188	RDsLPGkEk.P70188	RDsLPGkEk	0.484211	0.032064	0.0525028	P70188 1xPhospho [S102]	S102	-1.07329	Kifap3
P70188	LksLNANTDITSLAR.P70188	LksLNANTDITSLAR	-0.449624	0.0481889	0.0741101	P70188 1xPhospho [S60]	S60	-1.07329	Kifap3
P70206	TASsPDSLR.P70206	TASsPDSLR	0.452632	0.0465754	0.0720052	P70206 1xPhospho [S1630]	S1630	-0.396857	Plxna1
P70265	RNsFTPLSSSNTIR.P70265	RNsFTPLSSSNTIR	-0.282707	0.226335	0.284339	P70265 1xPhospho [S469]	S469	0.112164	Pfkfb2
P70398	AQENYEGGEEVsPPQTk.P70398	AQENYEGGEEVsPPQTk	0.440602	0.0532928	0.0807976	P70398 1xPhospho [S2547]	S2547	0.229682	Usp9x
P70399	kLPTSEEERsPAkR.P70399	kLPTSEEERsPAkR	0.225564	0.337407	0.40178	P70399 1xPhospho [S1675]	S1675	-2.62259	Tp53bp1
P70429	QEsLERR.P70429	QEsLERR	0.568421	0.0100891	0.019114	P70429 1xPhospho [S150]	S150	-1.49286	Evl
P70429	SNsVEkPVSSLLSR.P70429	SNsVEkPVSSLLSR	0.766917	0.000120519	0.000426438	P70429 1xPhospho [S329]	S329	-1.49286	Evl
P70429	QVmEQQHRQEsLER.P70429	QVmEQQHRQEsLER	0.46015	0.0427264	0.0670235	P70429 1xPhospho [S150]	S150	-1.49286	Evl
P70677	TIHGSksVDSGIYLDSSYk.P70677	TIHGSksVDSGIYLDSSYk	0.879699	0	0	P70677 1xPhospho [S26]	S26	-4.04768	Casp3
P70698	GcRLsPR.P70698	GcRLsPR	0.753383	0.000191114	0.000630704	P70698 1xPhospho [S562]	S562	-1.75573	Ctps1
P70704	RTVsEIR.P70704	RTVsEIR	0.721805	0.000480272	0.00137647	P70704 1xPhospho [S9]	S9	1.47248	Atp8a1
P70704	TVsEIR.P70704	TVsEIR	0.875188	0	0	P70704 1xPhospho [S9]	S9	1.47248	Atp8a1
P81122	RVsGDGAQDLDR.P81122	RVsGDGAQDLDR	0.627068	0.00378742	0.00819853	P81122 1xPhospho [S556]	S556	-0.510725	Irs2
P81122	VAsPTSGLkR.P81122	VAsPTSGLkR	0.709774	0.000654853	0.00179171	P81122 1xPhospho [S1089]	S1089	-0.510725	Irs2
P81122	VAsPTSGLk.P81122	VAsPTSGLk	0.649624	0.00247148	0.00567355	P81122 1xPhospho [S1089]	S1089	-0.510725	Irs2
P83510	QNsDPTSENPPLPTR.P83510	QNsDPTSENPPLPTR	0.607519	0.00535194	0.0111542	P83510 1xPhospho [S611]	S611	-0.0464926	Tnik
P83510	VEmPRQNsDPTSENPPLPTR.P83510	VEmPRQNsDPTSENPPLPTR	0.299248	0.199406	0.255836	P83510 1xPhospho [S611]	S611	-0.0464926	Tnik
P83510	TTSIsPALAR.P83510	TTSIsPALAR	0.586466	0.00759661	0.0149455	P83510 1xPhospho [S651]	S651	-0.0464926	Tnik
P83510	kNsPGNGSALGPR.P83510	kNsPGNGSALGPR	-0.234586	0.317995	0.381367	P83510 1xPhospho [S659]	S659	-0.0464926	Tnik
P83510	QNsDPTSENPPLPTRIEk.P83510	QNsDPTSENPPLPTRIEk	0.344361	0.137339	0.185511	P83510 1xPhospho [S611]	S611	-0.0464926	Tnik
P83510	LGSQPIRAsNPDLR.P83510	LGSQPIRAsNPDLR	-0.209023	0.3748	0.441615	P83510 1xPhospho [S678]	S678	-0.0464926	Tnik
P83510	SEGsPVLPHEPSk.P83510	SEGsPVLPHEPSk	-0.135338	0.568108	0.626116	P83510 1xPhospho [S740]	S740	-0.0464926	Tnik
P83510	LGSQPIRAsNPDLRR.P83510	LGSQPIRAsNPDLRR	-0.401504	0.0804202	0.116592	P83510 1xPhospho [S678]	S678	-0.0464926	Tnik
P84091	QQVRsPVTNIAR.P84091	QQVRsPVTNIAR	0.899248	1.18028e-06	1.0286e-05	P84091 1xPhospho [S45]	S45	1.81573	Ap2m1
P84104	RRsPPPR.P84104	RRsPPPR	0.547368	0.0138052	0.0250066	P84104 1xPhospho [S108]	S108	-2.08567	Srsf3
P97379	HLEELEEkSAtPPPAEPASLPQEPPk.P97379	HLEELEEkSAtPPPAEPASLPQEPPk	0.156391	0.508693	0.569978	P97379 1xPhospho [T227]	T227	-1.03	G3bp2
P97379	SAtPPPAEPASLPQEPPk.P97379	SAtPPPAEPASLPQEPPk	0.873684	0	0	P97379 1xPhospho [T227]	T227	-1.03	G3bp2
P97393	ESTHQSEDVFLPsPR.P97393	ESTHQSEDVFLPsPR	-0.126316	0.594489	0.651528	P97393 1xPhospho [S968]	S968	0.495639	Arhgap5
P97393	HNLDVVsPVPINk.P97393	HNLDVVsPVPINk	0.13985	0.555118	0.614969	P97393 1xPhospho [S765]	S765	0.495639	Arhgap5
P97427	sIPHITSDR.P97427	sIPHITSDR	-0.723308	0.000461386	0.00133208	P97427 1xPhospho [S8]	S8	-1.32302	Crmp1
P97434	SksNPDFLk.P97434	SksNPDFLk	0.357895	0.121794	0.166617	P97434 1xPhospho [S992]	S992	0.236639	Mprip
P97434	QVPIAPLHLsLEDR.P97434	QVPIAPLHLsLEDR	0.196992	0.403442	0.468789	P97434 1xPhospho [S661]	S661	0.236639	Mprip
P97434	VESGYFsLEk.P97434	VESGYFsLEk	0.0631579	0.791774	0.82655	P97434 1xPhospho [S270]	S270	0.236639	Mprip
P97445	EEQNRtPLmFQR.P97445	EEQNRtPLmFQR	0.682707	0.00123879	0.00311087	P97445 1xPhospho [T1935]	T1935	2.84414	Cacna1a
P97445	EVAEVsPLSAANmSIAVk.P97445	EVAEVsPLSAANmSIAVk	0.2	0.396169	0.462393	P97445 1xPhospho [S752]	S752	2.84414	Cacna1a
P97445	GADYTEPDsPREPPGGAHDPAPR.P97445	GADYTEPDsPREPPGGAHDPAPR	0.0857143	0.71911	0.765987	P97445 1xPhospho [S2303]	S2303	2.84414	Cacna1a
P97445	WSRsPSEGR.P97445	WSRsPSEGR	0.846617	0	0	P97445 1xPhospho [S2200]	S2200	2.84414	Cacna1a
P97445	AWPGsPER.P97445	AWPGsPER	0.766917	0.000120519	0.000426438	P97445 1xPhospho [S867]	S867	2.84414	Cacna1a
P97445	TGTWsPERGPPIDmPNSQPNSQSVEmR.P97445	TGTWsPERGPPIDmPNSQPNSQSVEmR	0.330827	0.154266	0.205659	P97445 1xPhospho [S1998]	S1998	2.84414	Cacna1a
P97445	ESPsWVTQR.P97445	ESPsWVTQR	0.917293	3.54614e-06	2.4256e-05	P97445 1xPhospho [S1981]	S1981	2.84414	Cacna1a
P97445	RAWPGsPERAPGR.P97445	RAWPGsPERAPGR	0.596992	0.00639357	0.0129914	P97445 1xPhospho [S867]	S867	2.84414	Cacna1a
P97445	mAGPAAPPGGsPR.P97445	mAGPAAPPGGsPR	0.533835	0.0167341	0.0295389	P97445 1xPhospho [S2273]	S2273	2.84414	Cacna1a
P97445	AWPGsPERAPGR.P97445	AWPGsPERAPGR	0.908271	2.42476e-06	1.84047e-05	P97445 1xPhospho [S867]	S867	2.84414	Cacna1a
P97445	AAGcAsPR.P97445	AAGcAsPR	0.92782	4.64804e-06	2.94763e-05	P97445 1xPhospho [S2329]	S2329	2.84414	Cacna1a
P97445	EPPGGAHDPAPRsPR.P97445	EPPGGAHDPAPRsPR	0.613534	0.00482246	0.0101769	P97445 1xPhospho [S2318]	S2318	2.84414	Cacna1a
P97445	kQNLLAsREALYGDAAER.P97445	kQNLLAsREALYGDAAER	0.842105	0	0	P97445 1xPhospho [S792]	S792	2.84414	Cacna1a
P97792	APQsPTLAPAk.P97792	APQsPTLAPAk	0.682707	0.00123879	0.00311087	P97792 1xPhospho [S332]	S332	-3.54213	Cxadr
P97797	AQPAPkPEPSFSEyASVQVQR.P97797	AQPAPkPEPSFSEyASVQVQR	0.935338	5.28234e-06	3.13082e-05	P97797 1xPhospho [Y505]	Y505	2.23357	Sirpa
P97798	NSQDItPVDNSmDSNIHQR.P97798	NSQDItPVDNSmDSNIHQR	0.864662	0	0	P97798 1xPhospho [T1229]	T1229	-1.8994	Neo1
P97868	VEGTEIVkPsPk.P97868	VEGTEIVkPsPk	0.381955	0.0973949	0.13764	P97868 1xPhospho [S1179]	S1179	-0.466185	Rbbp6
P98200	ATsVGDQLEAPAR.P98200	ATsVGDQLEAPAR	0.83609	0	0	P98200 1xPhospho [S6]	S6	-0.926836	Atp8a2
P98203	VVRRsPSVDSTR.P98203	VVRRsPSVDSTR	0.234586	0.317995	0.381367	P98203 1xPhospho [S345]	S345	-0.458696	Arvcf
P98203	RSPsVDSTR.P98203	RSPsVDSTR	-0.0736842	0.757612	0.798683	P98203 1xPhospho [S347]	S347	-0.458696	Arvcf
P98203	RSPsVDSTRkEPR.P98203	RSPsVDSTRkEPR	0.087218	0.714342	0.762289	P98203 1xPhospho [S347]	S347	-0.458696	Arvcf
Q00PI9	sPPPPEEEAk.Q00PI9	sPPPPEEEAk	0.741353	0.000277397	0.000867972	Q00PI9 1xPhospho [S226]	S226	-1.209	Hnrnpul2
Q00PI9	sGDETPGSEAPGDk.Q00PI9	sGDETPGSEAPGDk	0.254135	0.278347	0.339881	Q00PI9 1xPhospho [S159]	S159	-1.209	Hnrnpul2
Q00PI9	SkPAGsDGER.Q00PI9	SkPAGsDGER	0.463158	0.0412588	0.0651994	Q00PI9 1xPhospho [S191]	S191	-1.209	Hnrnpul2
Q01063	SDSDYDLsPk.Q01063	SDSDYDLsPk	0.47218	0.0370929	0.0596579	Q01063 1xPhospho [S141]	S141	0.617316	Pde4d
Q01065	QPsLDVDVGDPNPDVVSFR.Q01065	QPsLDVDVGDPNPDVVSFR	0.759398	0.000156672	0.000529667	Q01065 1xPhospho [S465]	S465	2.04341	Pde1b
Q01097	LSsIESDV.Q01097	LSsIESDV	-0.240602	0.305444	0.36838	Q01097 1xPhospho [S1477]	S1477	0.853038	Grin2b
Q01097	sFTHSDck.Q01097	sFTHSDck	0.389474	0.0905761	0.128933	Q01097 1xPhospho [S940]	S940	0.853038	Grin2b
Q02248	TsmGGTQQQFVEGVR.Q02248	TsmGGTQQQFVEGVR	-0.172932	0.464263	0.528245	Q02248 1xPhospho [S552]	S552	-0.14012	Ctnnb1
Q03137	VLEDDPEAAyTTR.Q03137	VLEDDPEAAyTTR	-0.389474	0.0905761	0.128933	Q03137 1xPhospho [Y779]	Y779	0.327409	Epha4
Q04447	VLtPELYAELR.Q04447	VLtPELYAELR	0.700752	0.00081682	0.00217418	Q04447 1xPhospho [T35]	T35	1.94177	Ckb
Q04690	sFDHLISDTk.Q04690	sFDHLISDTk	0.57594	0.00897977	0.0172485	Q04690 1xPhospho [S2545]	S2545	0.548588	Nf1
Q04690	SAGsFkR.Q04690	SAGsFkR	0.807519	1.80072e-05	8.10153e-05	Q04690 1xPhospho [S2831]	S2831	0.548588	Nf1
Q04690	SmsLDmGQPSQANTk.Q04690	SmsLDmGQPSQANTk	0.55188	0.0129274	0.0236717	Q04690 1xPhospho [S2525]	S2525	0.548588	Nf1
Q04690	ksFDHLISDTk.Q04690	ksFDHLISDTk	0.538346	0.0157066	0.0280407	Q04690 1xPhospho [S2545]	S2545	0.548588	Nf1
Q04735	RVsLSEIGFGk.Q04735	RVsLSEIGFGk	0.556391	0.0120956	0.0223049	Q04735 1xPhospho [S153]	S153	0.0394817	Cdk16
Q05BC3	REsSGDSk.Q05BC3	REsSGDSk	-0.105263	0.657985	0.708901	Q05BC3 1xPhospho [S146]	S146	-1.12783	Eml1
Q06649	AHsFTSk.Q06649	AHsFTSk	0.965414	6.53935e-06	3.38235e-05	Q06649 1xPhospho [S225]	S225	-4.89216	Sh3bp2
Q08274	YHsLGNISR.Q08274	YHsLGNISR	-0.380451	0.0988034	0.138963	Q08274 1xPhospho [S537]	S537	0.275703	Dmwd
Q08274	SNsLPHPAGGGk.Q08274	SNsLPHPAGGGk	0	1	1	Q08274 1xPhospho [S487]	S487	0.275703	Dmwd
Q08460	RLEDEQPPTLsPk.Q08460	RLEDEQPPTLsPk	0.846617	0	0	Q08460 1xPhospho [S711]	S711	2.10627	Kcnma1
Q08460	NSPNTsPk.Q08460	NSPNTsPk	0.86015	0	0	Q08460 1xPhospho [S728]	S728	2.10627	Kcnma1
Q0KL02	TRPGAVsPLNsPLSTTFPSPFGk.Q0KL02	TRPGAVsPLNsPLSTTFPSPFGk	0.269173	0.250097	0.3094	Q0KL02 2xPhospho [S2458; S2462]	S2458	-0.509308	Trio
Q0PHV7	sLGDASPSAPESVGAR.Q0PHV7	sLGDASPSAPESVGAR	0.484211	0.032064	0.0525028	Q0PHV7 1xPhospho [S165]	S165	-0.541791	Dact3
Q0PHV7	AGPFLTPsPLHAVALR.Q0PHV7	AGPFLTPsPLHAVALR	0.380451	0.0988034	0.138963	Q0PHV7 1xPhospho [S217]	S217	-0.541791	Dact3
Q0PHV7	GIYASERPksLGDASPSAPESVGAR.Q0PHV7	GIYASERPksLGDASPSAPESVGAR	0.709774	0.000654853	0.00179171	Q0PHV7 1xPhospho [S165]	S165	-0.541791	Dact3
Q11011	kTsPPSV.Q11011	kTsPPSV	0.254135	0.278347	0.339881	Q11011 1xPhospho [S916]	S916	0.230135	Npepps
Q148V7	AGsISTLDSLDFAR.Q148V7	AGsISTLDSLDFAR	0.0556391	0.816412	0.845146	Q148V7 1xPhospho [S180]	S180	0.680339	Relch
Q148V7	QSGtPPGmGAPGIPGASIVGGAGGR.Q148V7	QSGtPPGmGAPGIPGASIVGGAGGR	-0.542857	0.0147309	0.0264594	Q148V7 1xPhospho [T143]	T143	0.680339	Relch
Q14CH0	HINNNLsPSLGDAQEEkR.Q14CH0	HINNNLsPSLGDAQEEkR	-0.237594	0.311681	0.374941	Q14CH0 1xPhospho [S501]	S501	0.978659	Fam171b
Q14CH0	HILEGGSGVIIEHPGEEsPGRk.Q14CH0	HILEGGSGVIIEHPGEEsPGRk	0.6	0.00608027	0.01243	Q14CH0 1xPhospho [S777]	S777	0.978659	Fam171b
Q2KN98	SksDNQISDkAALEAk.Q2KN98	SksDNQISDkAALEAk	0.536842	0.0160432	0.0285119	Q2KN98 1xPhospho [S171]	S171	-1.37534	Specc1l
Q2M3X8	SDSLVPGTHtPPIR.Q2M3X8	SDSLVPGTHtPPIR	0.0526316	0.826316	0.853147	Q2M3X8 1xPhospho [T104]	T104	2.13411	Phactr1
Q2M3X8	kLsQRPTVEELR.Q2M3X8	kLsQRPTVEELR	0.13985	0.555118	0.614969	Q2M3X8 1xPhospho [S505]	S505	2.13411	Phactr1
Q2M3X8	SksDTPYLAEAR.Q2M3X8	SksDTPYLAEAR	0.86015	0	0	Q2M3X8 1xPhospho [S67]	S67	2.13411	Phactr1
Q2NL51	TSsFAEPGGGGGGGGGGPGGSASGPGGTGGGk.Q2NL51	TSsFAEPGGGGGGGGGGPGGSASGPGGTGGGk	0.0541353	0.821361	0.849522	Q2NL51 1xPhospho [S21]	S21	0.174695	Gsk3a
Q2PFD7	NVsERkDHRPETPGIk.Q2PFD7	NVsERkDHRPETPGIk	0.311278	0.181256	0.236416	Q2PFD7 1xPhospho [S1020]	S1020	1.53449	Psd3
Q2PFD7	IGsTTNPFLDIPHDPNAAVYk.Q2PFD7	IGsTTNPFLDIPHDPNAAVYk	0.696241	0.000909209	0.00239571	Q2PFD7 1xPhospho [S759]	S759	1.53449	Psd3
Q3B7Z2	SLsELESLk.Q3B7Z2	SLsELESLk	0.780451	7.156e-05	0.000271144	Q3B7Z2 1xPhospho [S238]	S238	0.53389	Osbp
Q3TEA8	AVNSTREtPPkSk.Q3TEA8	AVNSTREtPPkSk	0.801504	2.60281e-05	0.00011095	Q3TEA8 1xPhospho [T51]	T51	-1.0136	Hp1bp3
Q3TEA8	AVNSTREtPPk.Q3TEA8	AVNSTREtPPk	0.58797	0.00741417	0.0146724	Q3TEA8 1xPhospho [T51]	T51	-1.0136	Hp1bp3
Q3TES0	QGsPTAkR.Q3TES0	QGsPTAkR	0.52782	0.0181883	0.0317485	Q3TES0 1xPhospho [S1023]	S1023	1.27429	Iqsec3
Q3TES0	AAsPGR.Q3TES0	AAsPGR	0.786466	5.52894e-05	0.000215391	Q3TES0 1xPhospho [S266]	S266	1.27429	Iqsec3
Q3THG9	ELsLDDPEVEQVR.Q3THG9	ELsLDDPEVEQVR	0.76391	0.000134123	0.000461392	Q3THG9 1xPhospho [S174]	S174	-2.165	Aarsd1
Q3THK7	TLNmTTsPEEk.Q3THK7	TLNmTTsPEEk	-0.215038	0.360934	0.427632	Q3THK7 1xPhospho [S332]	S332	-0.215362	Gmps
Q3TLH4	LGIIEkQPsPEELRER.Q3TLH4	LGIIEkQPsPEELRER	0.389474	0.0905761	0.128933	Q3TLH4 1xPhospho [S501]	S501	-0.681557	Prrc2c
Q3TLH4	QPsPEELRER.Q3TLH4	QPsPEELRER	0.267669	0.252834	0.312293	Q3TLH4 1xPhospho [S501]	S501	-0.681557	Prrc2c
Q3TLI0	RQEsGSSLEPPSGLALEDGAHVLR.Q3TLI0	RQEsGSSLEPPSGLALEDGAHVLR	-0.506767	0.024104	0.0408327	Q3TLI0 1xPhospho [S708]	S708	0.928766	NA
Q3TLI0	SPsDNSLNTTGIIcR.Q3TLI0	SPsDNSLNTTGIIcR	-0.0556391	0.816412	0.845146	Q3TLI0 1xPhospho [S685]	S685	0.928766	NA
Q3TWL2	IINLGPVHPGPLsPEPQPmGVR.Q3TWL2	IINLGPVHPGPLsPEPQPmGVR	0.186466	0.42948	0.493923	Q3TWL2 1xPhospho [S169]	S169	0.0176592	Pip4p1
Q3TY60	APTIQPQHsHEAVRR.Q3TY60	APTIQPQHsHEAVRR	0.0977444	0.681267	0.730972	Q3TY60 1xPhospho [S102]	S102	1.11706	Fam131b
Q3TY60	DTDAYSDLsDGEkEAR.Q3TY60	DTDAYSDLsDGEkEAR	0.572932	0.0094108	0.0180176	Q3TY60 1xPhospho [S117]	S117	1.11706	Fam131b
Q3TY60	RDTDAYSDLsDGEkEAR.Q3TY60	RDTDAYSDLsDGEkEAR	0.586466	0.00759661	0.0149455	Q3TY60 1xPhospho [S117]	S117	1.11706	Fam131b
Q3TY60	VSDVTSSGVQsFDEEEGDANN.Q3TY60	VSDVTSSGVQsFDEEEGDANN	-0.0721805	0.762467	0.802363	Q3TY60 1xPhospho [S322]	S322	1.11706	Fam131b
Q3TZZ7	RPsVSk.Q3TZZ7	RPsVSk	0.257143	0.272541	0.333657	Q3TZZ7 1xPhospho [S600]	S600	0.491471	Esyt2
Q3U0M1	FNFESVPEsPGEk.Q3U0M1	FNFESVPEsPGEk	-0.267669	0.252834	0.312293	Q3U0M1 1xPhospho [S953]	S953	0.398938	Trappc9
Q3U0V1	VQIsPDSGGLPER.Q3U0V1	VQIsPDSGGLPER	0.393985	0.0866607	0.124185	Q3U0V1 1xPhospho [S182]	S182	-1.46766	Khsrp
Q3U1F9	FSsLSYk.Q3U1F9	FSsLSYk	0.828571	1.53983e-06	1.29864e-05	Q3U1F9 1xPhospho [S293]	S293	-1.55166	Pag1
Q3U1Y4	SAPSsPAPR.Q3U1Y4	SAPSsPAPR	0.818045	7.84202e-06	3.89288e-05	Q3U1Y4 1xPhospho [S736]	S736	1.10718	Dennd4b
Q3U1Y4	SGsLGSAR.Q3U1Y4	SGsLGSAR	0.896241	7.48063e-07	6.90272e-06	Q3U1Y4 1xPhospho [S961]	S961	1.10718	Dennd4b
Q3U214	RLsADLR.Q3U214	RLsADLR	0.843609	0	0	Q3U214 1xPhospho [S769]	S769	2.06078	Mast3
Q3U214	VYSsSEFLAVQPTPTFAER.Q3U214	VYSsSEFLAVQPTPTFAER	0.0571429	0.81147	0.842625	Q3U214 1xPhospho [S732]	S732	2.06078	Mast3
Q3U214	QEAVQEVsFDEEPGPPR.Q3U214	QEAVQEVsFDEEPGPPR	0.529323	0.0178155	0.0311672	Q3U214 1xPhospho [S1289]	S1289	2.06078	Mast3
Q3U214	HFRsSESVVDEDGGRSPR.Q3U214	HFRsSESVVDEDGGRSPR	0.281203	0.228898	0.287099	Q3U214 1xPhospho [S156]	S156	2.06078	Mast3
Q3U214	SSESVVDEDGGRsPR.Q3U214	SSESVVDEDGGRsPR	0.804511	2.17922e-05	9.5845e-05	Q3U214 1xPhospho [S168]	S168	2.06078	Mast3
Q3UFT3	TDWNEDcksPk.Q3UFT3	TDWNEDcksPk	0.36391	0.115314	0.158768	Q3UFT3 1xPhospho [S356]	S356	-0.389955	Garem1
Q3UFT3	SLsEkSR.Q3UFT3	SLsEkSR	0.774436	9.10218e-05	0.000333605	Q3UFT3 1xPhospho [S473]	S473	-0.389955	Garem1
Q3UFT3	AtPETSPLPLk.Q3UFT3	AtPETSPLPLk	0.00150376	0.997464	0.999588	Q3UFT3 1xPhospho [T738]	T738	-0.389955	Garem1
Q3UGY8	GPDsPLLQRPQHLIDQGQmR.Q3UGY8	GPDsPLLQRPQHLIDQGQmR	-0.368421	0.110623	0.153386	Q3UGY8 1xPhospho [S2054]	S2054	0.745623	Arfgef3
Q3UGY8	VAAPSSsPSAEAEYWR.Q3UGY8	VAAPSSsPSAEAEYWR	0.550376	0.0132148	0.0240855	Q3UGY8 1xPhospho [S1646]	S1646	0.745623	Arfgef3
Q3UH66	AGsLGPETPSR.Q3UH66	AGsLGPETPSR	0.147368	0.533777	0.595532	Q3UH66 1xPhospho [S1797]	S1797	-0.0746526	Wnk2
Q3UHB8	SFSLGDLSHsPQTAQHVER.Q3UHB8	SFSLGDLSHsPQTAQHVER	0.703759	0.000759583	0.00205437	Q3UHB8 1xPhospho [S310]	S310	1.35965	Ccdc177
Q3UHB8	kSHsLDSLSR.Q3UHB8	kSHsLDSLSR	0.816541	9.03085e-06	4.45484e-05	Q3UHB8 1xPhospho [S231]	S231	1.35965	Ccdc177
Q3UHB8	SHsLDSLSR.Q3UHB8	SHsLDSLSR	0.876692	0	0	Q3UHB8 1xPhospho [S231]	S231	1.35965	Ccdc177
Q3UHB8	YVLTsPR.Q3UHB8	YVLTsPR	0.896241	7.48063e-07	6.90272e-06	Q3UHB8 1xPhospho [S90]	S90	1.35965	Ccdc177
Q3UHC7	QNsAGPQR.Q3UHC7	QNsAGPQR	0.536842	0.0160432	0.0285119	Q3UHC7 1xPhospho [S910]	S910	0.164576	Dab2ip
Q3UHC7	GDsPELkPR.Q3UHC7	GDsPELkPR	0.463158	0.0412588	0.0651994	Q3UHC7 1xPhospho [S978]	S978	0.164576	Dab2ip
Q3UHC7	LPsPTPENkDLFFVTR.Q3UHC7	LPsPTPENkDLFFVTR	0.422556	0.0647536	0.0960083	Q3UHC7 1xPhospho [S702]	S702	0.164576	Dab2ip
Q3UHC7	LPsPTPENk.Q3UHC7	LPsPTPENk	-0.0706767	0.76733	0.806039	Q3UHC7 1xPhospho [S702]	S702	0.164576	Dab2ip
Q3UHC7	QGPSPVsPNALDR.Q3UHC7	QGPSPVsPNALDR	0.309774	0.18346	0.238366	Q3UHC7 1xPhospho [S995]	S995	0.164576	Dab2ip
Q3UHC7	SLsmVDLQDAR.Q3UHC7	SLsmVDLQDAR	-0.276692	0.236703	0.295627	Q3UHC7 1xPhospho [S747]	S747	0.164576	Dab2ip
Q3UHD3	QLsEEHAVkR.Q3UHD3	QLsEEHAVkR	0.730827	0.000375653	0.00112314	Q3UHD3 1xPhospho [S109]	S109	-1.23911	Mtus2
Q3UHD3	SmsPVER.Q3UHD3	SmsPVER	0.673684	0.00150847	0.00365544	Q3UHD3 1xPhospho [S332]	S332	-1.23911	Mtus2
Q3UHD6	IVkSEsGYGFNVR.Q3UHD6	IVkSEsGYGFNVR	0.57594	0.00897977	0.0172485	Q3UHD6 1xPhospho [S49]	S49	0.671374	Snx27
Q3UHD9	SFGsLR.Q3UHD9	SFGsLR	0.535338	0.0163857	0.0289891	Q3UHD9 1xPhospho [S859]	S859	0.772194	Agap2
Q3UHD9	LRTDsQSEAVAIQAIR.Q3UHD9	LRTDsQSEAVAIQAIR	0.768421	0.00011412	0.000406855	Q3UHD9 1xPhospho [S921]	S921	0.772194	Agap2
Q3UHD9	GSEPRDPGsPR.Q3UHD9	GSEPRDPGsPR	0.535338	0.0163857	0.0289891	Q3UHD9 1xPhospho [S54]	S54	0.772194	Agap2
Q3UHD9	RGsDAEk.Q3UHD9	RGsDAEk	0.285714	0.221267	0.279614	Q3UHD9 1xPhospho [S650]	S650	0.772194	Agap2
Q3UHD9	RGsDAEkR.Q3UHD9	RGsDAEkR	0.783459	6.30519e-05	0.000241238	Q3UHD9 1xPhospho [S650]	S650	0.772194	Agap2
Q3UHD9	TDsQSEAVAIQAIR.Q3UHD9	TDsQSEAVAIQAIR	-0.237594	0.311681	0.374941	Q3UHD9 1xPhospho [S921]	S921	0.772194	Agap2
Q3UHD9	DPGsPR.Q3UHD9	DPGsPR	0.46015	0.0427264	0.0670235	Q3UHD9 1xPhospho [S54]	S54	0.772194	Agap2
Q3UHD9	GkLsPR.Q3UHD9	GkLsPR	0.336842	0.146569	0.196735	Q3UHD9 1xPhospho [S262]	S262	0.772194	Agap2
Q3UHD9	AEAAAVAGLSTPGsLHR.Q3UHD9	AEAAAVAGLSTPGsLHR	-0.500752	0.0260515	0.0435983	Q3UHD9 1xPhospho [S632]	S632	0.772194	Agap2
Q3UHH1	RLsAEGGDk.Q3UHH1	RLsAEGGDk	0.642105	0.00285961	0.00644507	Q3UHH1 1xPhospho [S564]	S564	-0.494143	Zswim8
Q3UHJ0	ILsDVTHSAVFGVPASk.Q3UHJ0	ILsDVTHSAVFGVPASk	0.822556	4.73313e-06	2.94763e-05	Q3UHJ0 1xPhospho [S635]	S635	2.17844	Aak1
Q3UHJ0	VGSLtPPSsPkTQR.Q3UHJ0	VGSLtPPSsPkTQR	0.47218	0.0370929	0.0596579	Q3UHJ0 2xPhospho [T618; S622]	T618	2.17844	Aak1
Q3UHJ0	VQTtPPPTIQGQk.Q3UHJ0	VQTtPPPTIQGQk	0.942857	5.785e-06	3.24871e-05	Q3UHJ0 1xPhospho [T604]	T604	2.17844	Aak1
Q3UHK6	ELGLGEmtPPHGTLYR.Q3UHK6	ELGLGEmtPPHGTLYR	0.231579	0.324388	0.387454	Q3UHK6 1xPhospho [T89]	T89	0.604049	Tenm4
Q3UHL1	SAtPATDGR.Q3UHL1	SAtPATDGR	-0.0977444	0.681267	0.730972	Q3UHL1 1xPhospho [T438]	T438	0.878025	Camkv
Q3UHL1	AAAtPEPAVAQPDSTALEGATGQAPPSSk.Q3UHL1	AAAtPEPAVAQPDSTALEGATGQAPPSSk	-0.0796992	0.738284	0.782514	Q3UHL1 1xPhospho [T470]	T470	0.878025	Camkv
Q3UKC1	kLEGQsPQQVSR.Q3UKC1	kLEGQsPQQVSR	-0.0481203	0.841221	0.865876	Q3UKC1 1xPhospho [S632]	S632	0.247255	Tax1bp1
Q3UL36	ASsPPDR.Q3UL36	ASsPPDR	0.469173	0.0384427	0.0614509	Q3UL36 1xPhospho [S75]	S75	-1.15716	Arglu1
Q3UMB5	GSISSGEsIEVLGTEk.Q3UMB5	GSISSGEsIEVLGTEk	-0.0977444	0.681267	0.730972	Q3UMB5 1xPhospho [S470]	S470	0.385242	Smcr8
Q3UMB5	VAsPANVGTLHTLSR.Q3UMB5	VAsPANVGTLHTLSR	0.445113	0.0506908	0.0773511	Q3UMB5 1xPhospho [S788]	S788	0.385242	Smcr8
Q3UMR0	RPRPSEVPAQsPTR.Q3UMR0	RPRPSEVPAQsPTR	0.643609	0.00277821	0.00632218	Q3UMR0 1xPhospho [S634]	S634	1.32373	Ankrd27
Q3UMR0	DRsVPDLAGR.Q3UMR0	DRsVPDLAGR	0.121805	0.607873	0.663108	Q3UMR0 1xPhospho [S961]	S961	1.32373	Ankrd27
Q3UNH4	SVATGPmtPQAAAPPAVPPVFPEVR.Q3UNH4	SVATGPmtPQAAAPPAVPPVFPEVR	0.828571	1.53983e-06	1.29864e-05	Q3UNH4 1xPhospho [T795]	T795	-2.59991	Gprin1
Q3UNH4	AETVsPGEVDAmTLGk.Q3UNH4	AETVsPGEVDAmTLGk	0.917293	3.54614e-06	2.4256e-05	Q3UNH4 1xPhospho [S495]	S495	-2.59991	Gprin1
Q3UNH4	ERPGsTGEGDLVSLR.Q3UNH4	ERPGsTGEGDLVSLR	0.180451	0.44476	0.508761	Q3UNH4 1xPhospho [S219]	S219	-2.59991	Gprin1
Q3UNH4	RERPGsTGEGDLVSLRENDmkPPDNTDSASTk.Q3UNH4	RERPGsTGEGDLVSLRENDmkPPDNTDSASTk	0.753383	0.000191114	0.000630704	Q3UNH4 1xPhospho [S219]	S219	-2.59991	Gprin1
Q3UNH4	kAsLPASEk.Q3UNH4	kAsLPASEk	0.637594	0.00311567	0.00694899	Q3UNH4 1xPhospho [S468]	S468	-2.59991	Gprin1
Q3UNH4	RERPGsTGEGDLVSLR.Q3UNH4	RERPGsTGEGDLVSLR	0.302256	0.194757	0.250828	Q3UNH4 1xPhospho [S219]	S219	-2.59991	Gprin1
Q3UNH4	kTDPEFSGkLtPGSSGk.Q3UNH4	kTDPEFSGkLtPGSSGk	0.804511	2.17922e-05	9.5845e-05	Q3UNH4 1xPhospho [T256]	T256	-2.59991	Gprin1
Q3UNH4	sPSAEAAAPPPGPR.Q3UNH4	sPSAEAAAPPPGPR	0.562406	0.0110552	0.0207108	Q3UNH4 1xPhospho [S691]	S691	-2.59991	Gprin1
Q3UNH4	APsPAPRPPSR.Q3UNH4	APsPAPRPPSR	0.833083	0	0	Q3UNH4 1xPhospho [S764]	S764	-2.59991	Gprin1
Q3UNH4	NSELVsPVkPER.Q3UNH4	NSELVsPVkPER	0.881203	0	0	Q3UNH4 1xPhospho [S369]	S369	-2.59991	Gprin1
Q3UNH4	APsWDAGAPPPR.Q3UNH4	APsWDAGAPPPR	0.273684	0.242002	0.30065	Q3UNH4 1xPhospho [S714]	S714	-2.59991	Gprin1
Q3UPL0	EQTLsPTIINGLHSIAR.Q3UPL0	EQTLsPTIINGLHSIAR	-0.0917293	0.700101	0.74811	Q3UPL0 1xPhospho [S1173]	S1173	0.152745	Sec31a
Q3USB7	RmsGDYNGEQk.Q3USB7	RmsGDYNGEQk	0.377444	0.101666	0.142393	Q3USB7 1xPhospho [S570]	S570	-0.0481427	Plcl1
Q3USB7	TVsFSSmPSEk.Q3USB7	TVsFSSmPSEk	0.142857	0.546535	0.606602	Q3USB7 1xPhospho [S96]	S96	-0.0481427	Plcl1
Q3USB7	kLPSESDLLEGEVtDEDEEAEmSR.Q3USB7	kLPSESDLLEGEVtDEDEEAEmSR	-0.17594	0.456409	0.519811	Q3USB7 1xPhospho [T557]	T557	-0.0481427	Plcl1
Q3UTJ2	VQsSPNLLAAGR.Q3UTJ2	VQsSPNLLAAGR	0.114286	0.630454	0.685201	Q3UTJ2 1xPhospho [S27]	S27	0.506808	Sorbs2
Q3UTJ2	RksEPAVGPLR.Q3UTJ2	RksEPAVGPLR	0.896241	7.48063e-07	6.90272e-06	Q3UTJ2 1xPhospho [S339]	S339	0.506808	Sorbs2
Q3UTJ2	GAEDYPDPPLPHSYsSDR.Q3UTJ2	GAEDYPDPPLPHSYsSDR	0.421053	0.0657879	0.0974192	Q3UTJ2 1xPhospho [S1097]	S1097	0.506808	Sorbs2
Q3UTJ2	RRGsLPDNSILHR.Q3UTJ2	RRGsLPDNSILHR	0.733835	0.000345147	0.00105471	Q3UTJ2 1xPhospho [S829]	S829	0.506808	Sorbs2
Q3UTJ2	RGsLPDNSILHR.Q3UTJ2	RGsLPDNSILHR	-0.18797	0.425705	0.490541	Q3UTJ2 1xPhospho [S829]	S829	0.506808	Sorbs2
Q3UTJ2	RVQsSPNLLAAGR.Q3UTJ2	RVQsSPNLLAAGR	-0.26015	0.266813	0.328181	Q3UTJ2 1xPhospho [S27]	S27	0.506808	Sorbs2
Q3UTQ8	NLSEGNNANYTEyVATR.Q3UTQ8	NLSEGNNANYTEyVATR	-0.0917293	0.700101	0.74811	Q3UTQ8 1xPhospho [Y171]	Y171	1.02529	Cdkl5
Q3UTQ8	LLDRsPSR.Q3UTQ8	LLDRsPSR	0.300752	0.197072	0.253532	Q3UTQ8 1xPhospho [S306]	S306	1.02529	Cdkl5
Q3UTQ8	DLTNNNIPHLLsPk.Q3UTQ8	DLTNNNIPHLLsPk	0.276692	0.236703	0.295627	Q3UTQ8 1xPhospho [S407]	S407	1.02529	Cdkl5
Q3UU96	SmsASSGLSAR.Q3UU96	SmsASSGLSAR	0.711278	0.00063059	0.00173745	Q3UU96 1xPhospho [S1616]	S1616	-0.163278	Cdc42bpa
Q3UU96	TVFSGSVsIPSITk.Q3UU96	TVFSGSVsIPSITk	0.285714	0.221267	0.279614	Q3UU96 1xPhospho [S1600]	S1600	-0.163278	Cdc42bpa
Q3UU96	EFsGGSYNTk.Q3UU96	EFsGGSYNTk	0.553383	0.0126451	0.0232453	Q3UU96 1xPhospho [S1638]	S1638	-0.163278	Cdc42bpa
Q3UVC0	LkPPGtPPPSSR.Q3UVC0	LkPPGtPPPSSR	-0.0977444	0.681267	0.730972	Q3UVC0 1xPhospho [T291]	T291	0.897536	Ksr2
Q3UVL4	kAQsSDSSkR.Q3UVL4	kAQsSDSSkR	0.741353	0.000277397	0.000867972	Q3UVL4 1xPhospho [S640]	S640	1.00532	Vps51
Q3UVX5	DYTQSSSsL.Q3UVX5	DYTQSSSsL	0.415038	0.0700529	0.103086	Q3UVX5 1xPhospho [S1202]	S1202	-0.34274	Grm5
Q3UYC0	AAsLRGGVGAPGSPSTPPTR.Q3UYC0	AAsLRGGVGAPGSPSTPPTR	0.622556	0.00410974	0.00879111	Q3UYC0 1xPhospho [S210]	S210	1.39289	Ppm1h
Q3V0G7	SIERPLksPLVSk.Q3V0G7	SIERPLksPLVSk	0.896241	7.48063e-07	6.90272e-06	Q3V0G7 1xPhospho [S893]	S893	-0.904152	Garnl3
Q3V3V9	LQRsPVLk.Q3V3V9	LQRsPVLk	0.240602	0.305444	0.36838	Q3V3V9 1xPhospho [S1242]	S1242	1.22425	Carmil2
Q3V3V9	kAGsDGDImDSSTETPPISIk.Q3V3V9	kAGsDGDImDSSTETPPISIk	0.578947	0.00856506	0.016601	Q3V3V9 1xPhospho [S1134]	S1134	1.22425	Carmil2
Q4ACU6	ksPEDkk.Q4ACU6	ksPEDkk	0.696241	0.000909209	0.00239571	Q4ACU6 1xPhospho [S1188]	S1188	3.67982	Shank3
Q4ACU6	AHsPQGEGEIPLHR.Q4ACU6	AHsPQGEGEIPLHR	0.443609	0.0515469	0.0785047	Q4ACU6 1xPhospho [S482]	S482	3.67982	Shank3
Q4ACU6	SPTPVHsPDADRPGPLFVDVQTR.Q4ACU6	SPTPVHsPDADRPGPLFVDVQTR	0.93985	5.59971e-06	3.20587e-05	Q4ACU6 1xPhospho [S1134]	S1134	3.67982	Shank3
Q4ACU6	TksVGEDEk.Q4ACU6	TksVGEDEk	0.694737	0.00094183	0.00247336	Q4ACU6 1xPhospho [S781]	S781	3.67982	Shank3
Q4ACU6	EPsPTHR.Q4ACU6	EPsPTHR	0.634586	0.00329667	0.00729733	Q4ACU6 1xPhospho [S985]	S985	3.67982	Shank3
Q4JIM5	DksPSSLLEDAk.Q4JIM5	DksPSSLLEDAk	0.454135	0.0457847	0.0709692	Q4JIM5 1xPhospho [S632]	S632	-0.0722554	Abl2
Q4JIM5	VPVLIsPTLk.Q4JIM5	VPVLIsPTLk	0.461654	0.0419875	0.0661733	Q4JIM5 1xPhospho [S936]	S936	-0.0722554	Abl2
Q4KMM3	kATGVsAEDADPR.Q4KMM3	kATGVsAEDADPR	0.935338	5.28234e-06	3.13082e-05	Q4KMM3 1xPhospho [S308]	S308	3.99789	Oxr1
Q4KMM3	VVSStSEEEEAFTEkFLk.Q4KMM3	VVSStSEEEEAFTEkFLk	0.0736842	0.757612	0.798683	Q4KMM3 1xPhospho [T203]	T203	3.99789	Oxr1
Q4KMM3	SQsVDITAPGFNPLGGAGk.Q4KMM3	SQsVDITAPGFNPLGGAGk	0.742857	0.000265205	0.000836499	Q4KMM3 1xPhospho [S15]	S15	3.99789	Oxr1
Q4KMM3	FDTtPNELVQLNk.Q4KMM3	FDTtPNELVQLNk	0.821053	5.69638e-06	3.22202e-05	Q4KMM3 1xPhospho [T118]	T118	3.99789	Oxr1
Q4KUS2	ESYSDSmHsYEEFSEPR.Q4KUS2	ESYSDSmHsYEEFSEPR	0.790977	4.49369e-05	0.000180438	Q4KUS2 1xPhospho [S244]	S244	1.98034	Unc13a
Q4KUS2	ALsPTGSSR.Q4KUS2	ALsPTGSSR	0.900752	1.39393e-06	1.1927e-05	Q4KUS2 1xPhospho [S255]	S255	1.98034	Unc13a
Q4KUS2	AAtPEEk.Q4KUS2	AAtPEEk	0.933835	5.16599e-06	3.09302e-05	Q4KUS2 1xPhospho [T416]	T416	1.98034	Unc13a
Q4VA53	AEsPETSAVESTQSTPQk.Q4VA53	AEsPETSAVESTQSTPQk	0.693233	0.000975399	0.00254447	Q4VA53 1xPhospho [S1356]	S1356	-1.1829	Pds5b
Q4VAA2	SGDGGsLGSGSR.Q4VAA2	SGDGGsLGSGSR	0.58797	0.00741417	0.0146724	Q4VAA2 1xPhospho [S63]	S63	-0.854962	Cdv3
Q501J6	RDsTSYR.Q501J6	RDsTSYR	0.598496	0.0062353	0.0126918	Q501J6 1xPhospho [S520]	S520	-2.26448	Ddx17
Q505F5	RQsVSGLHR.Q505F5	RQsVSGLHR	0.440602	0.0532928	0.0807976	Q505F5 1xPhospho [S430]	S430	-1.07452	Lrrc47
Q52KF3	kLRPVsPEEIRR.Q52KF3	kLRPVsPEEIRR	-0.0270677	0.911407	0.923575	Q52KF3 1xPhospho [S229]	S229	0.373568	Spire1
Q52KF3	LRPVsPEEIRR.Q52KF3	LRPVsPEEIRR	0.678195	0.00136819	0.0033888	Q52KF3 1xPhospho [S229]	S229	0.373568	Spire1
Q52KF3	SRsVDkSDEELQFPk.Q52KF3	SRsVDkSDEELQFPk	-0.234586	0.317995	0.381367	Q52KF3 1xPhospho [S520]	S520	0.373568	Spire1
Q52KF3	RHsIEk.Q52KF3	RHsIEk	-0.0195489	0.936659	0.946718	Q52KF3 1xPhospho [S365]	S365	0.373568	Spire1
Q52KF3	LRPVsPEEIR.Q52KF3	LRPVsPEEIR	0.213534	0.364372	0.431271	Q52KF3 1xPhospho [S229]	S229	0.373568	Spire1
Q52KI8	EksPELPEPSVR.Q52KI8	EksPELPEPSVR	0.657143	0.00212785	0.00498688	Q52KI8 1xPhospho [S220]	S220	-2.22119	Srrm1
Q52KI8	HRPSsPAtPPPk.Q52KI8	HRPSsPAtPPPk	0.607519	0.00535194	0.0111542	Q52KI8 2xPhospho [S401; T404]	S401	-2.22119	Srrm1
Q52KI8	RRtPsPPPR.Q52KI8	RRtPsPPPR	0.560902	0.0113081	0.0211343	Q52KI8 2xPhospho [T600; S602]	T600	-2.22119	Srrm1
Q52KI8	TRHsPTPQQSNR.Q52KI8	TRHsPTPQQSNR	0.77594	8.58336e-05	0.000319062	Q52KI8 1xPhospho [S412]	S412	-2.22119	Srrm1
Q52KI8	TSsPPR.Q52KI8	TSsPPR	0.655639	0.00219322	0.00510955	Q52KI8 1xPhospho [S378]	S378	-2.22119	Srrm1
Q52KI8	TAsPPPPPk.Q52KI8	TAsPPPPPk	0.792481	4.18073e-05	0.000169901	Q52KI8 1xPhospho [S635]	S635	-2.22119	Srrm1
Q52KI8	sPQPNk.Q52KI8	sPQPNk	0.57594	0.00897977	0.0172485	Q52KI8 1xPhospho [S694]	S694	-2.22119	Srrm1
Q52KI8	AAsPSPQSVR.Q52KI8	AAsPSPQSVR	0.87218	0	0	Q52KI8 1xPhospho [S779]	S779	-2.22119	Srrm1
Q52KI8	WQsPVTk.Q52KI8	WQsPVTk	0.842105	0	0	Q52KI8 1xPhospho [S550]	S550	-2.22119	Srrm1
Q52KI8	REsPSPAPkPR.Q52KI8	REsPSPAPkPR	0.613534	0.00482246	0.0101769	Q52KI8 1xPhospho [S448]	S448	-2.22119	Srrm1
Q52KI8	RRsPsPPPAR.Q52KI8	RRsPsPPPAR	0.790977	4.49369e-05	0.000180438	Q52KI8 2xPhospho [S561; S563]	S561	-2.22119	Srrm1
Q52KI8	RTAsPPPPPkR.Q52KI8	RTAsPPPPPkR	0.849624	0	0	Q52KI8 1xPhospho [S635]	S635	-2.22119	Srrm1
Q52KI8	EARsPQPNk.Q52KI8	EARsPQPNk	0.554887	0.0123679	0.0227891	Q52KI8 1xPhospho [S694]	S694	-2.22119	Srrm1
Q52KI8	VSHsPPPk.Q52KI8	VSHsPPPk	0.745865	0.000242084	0.000774997	Q52KI8 1xPhospho [S657]	S657	-2.22119	Srrm1
Q52KI8	RRsPtPPPR.Q52KI8	RRsPtPPPR	0.494737	0.0281232	0.0465685	Q52KI8 2xPhospho [S591; T593]	S591	-2.22119	Srrm1
Q52KI8	QRsPTVTk.Q52KI8	QRsPTVTk	0.530827	0.0174489	0.0305941	Q52KI8 1xPhospho [S664]	S664	-2.22119	Srrm1
Q52KI8	SVSGsPEPAAk.Q52KI8	SVSGsPEPAAk	0.473684	0.0364322	0.0588366	Q52KI8 1xPhospho [S797]	S797	-2.22119	Srrm1
Q52KI8	TAsPPPPPkR.Q52KI8	TAsPPPPPkR	0.81203	1.31022e-05	6.26616e-05	Q52KI8 1xPhospho [S635]	S635	-2.22119	Srrm1
Q52KI8	RWQsPVTk.Q52KI8	RWQsPVTk	0.819549	6.73162e-06	3.38451e-05	Q52KI8 1xPhospho [S550]	S550	-2.22119	Srrm1
Q52KI8	QsPSPSTRPIR.Q52KI8	QsPSPSTRPIR	0.76391	0.000134123	0.000461392	Q52KI8 1xPhospho [S731]	S731	-2.22119	Srrm1
Q52KI8	RLsPsASPPR.Q52KI8	RLsPsASPPR	0.73985	0.000290025	0.000905078	Q52KI8 2xPhospho [S387; S389]	S387	-2.22119	Srrm1
Q52KI8	kAQVsPQS.Q52KI8	kAQVsPQS	0.807519	1.80072e-05	8.10153e-05	Q52KI8 1xPhospho [S943]	S943	-2.22119	Srrm1
Q571K4	RIsVTSk.Q571K4	RIsVTSk	0.43609	0.0559975	0.0843008	Q571K4 1xPhospho [S649]	S649	-0.982431	Tab3
Q5DTX6	TAQQPAGLALENVAsPDRR.Q5DTX6	TAQQPAGLALENVAsPDRR	0.38797	0.0919103	0.130595	Q5DTX6 1xPhospho [S888]	S888	2.98229	Jcad
Q5DTX6	SADsVEEPDPLk.Q5DTX6	SADsVEEPDPLk	0.18797	0.425705	0.490541	Q5DTX6 1xPhospho [S1248]	S1248	2.98229	Jcad
Q5DTY9	LLAPEDVkQsPDEFcHSDFEDASQGSDTR.Q5DTY9	LLAPEDVkQsPDEFcHSDFEDASQGSDTR	0.712782	0.000607059	0.00168643	Q5DTY9 1xPhospho [S130]	S130	3.26174	Kctd16
Q5DTY9	TLTSGsRESNISSk.Q5DTY9	TLTSGsRESNISSk	0.96391	6.52156e-06	3.38235e-05	Q5DTY9 1xPhospho [S372]	S372	3.26174	Kctd16
Q5DU14	YPVQSEGSSPLsPQYSk.Q5DU14	YPVQSEGSSPLsPQYSk	0.488722	0.0303245	0.0499325	Q5DU14 1xPhospho [S1554]	S1554	-1.55121	Myo16
Q5DU25	AQNPAYFEGkPAsLDEGAmAGAR.Q5DU25	AQNPAYFEGkPAsLDEGAmAGAR	0.878195	0	0	Q5DU25 1xPhospho [S402]	S402	1.32812	Iqsec2
Q5DU25	mQFsFEEYEk.Q5DU25	mQFsFEEYEk	0.714286	0.000584242	0.00162882	Q5DU25 1xPhospho [S383]	S383	1.32812	Iqsec2
Q5DU25	LRSsASESR.Q5DU25	LRSsASESR	0.0225564	0.92655	0.937708	Q5DU25 1xPhospho [S363]	S363	1.32812	Iqsec2
Q5DU25	SsLEDTYGAGDGLkR.Q5DU25	SsLEDTYGAGDGLkR	0.837594	0	0	Q5DU25 1xPhospho [S1114]	S1114	1.32812	Iqsec2
Q5F2E8	NsPQALRR.Q5F2E8	NsPQALRR	0.276692	0.236703	0.295627	Q5F2E8 1xPhospho [S965]	S965	0.0178806	Taok1
Q5F2E8	NsPQALR.Q5F2E8	NsPQALR	0.150376	0.525351	0.588083	Q5F2E8 1xPhospho [S965]	S965	0.0178806	Taok1
Q5FWK3	SSsPEPVTHLk.Q5FWK3	SSsPEPVTHLk	-0.0646617	0.786869	0.822159	Q5FWK3 1xPhospho [S51]	S51	0.733136	Arhgap1
Q5GH67	QAsNASk.Q5GH67	QAsNASk	0.747368	0.000231131	0.000748075	Q5GH67 1xPhospho [S214]	S214	0.357985	Xkr4
Q5GH67	sISNNR.Q5GH67	sISNNR	0.230075	0.327614	0.390712	Q5GH67 1xPhospho [S545]	S545	0.357985	Xkr4
Q5HZI2	RAtPEPGPESGQAPR.Q5HZI2	RAtPEPGPESGQAPR	0.148872	0.529556	0.591664	Q5HZI2 1xPhospho [T282]	T282	0.555094	C2cd4c
Q5HZI2	HGSLSADDSTPDTsPGVR.Q5HZI2	HGSLSADDSTPDTsPGVR	0.529323	0.0178155	0.0311672	Q5HZI2 1xPhospho [S270]	S270	0.555094	C2cd4c
Q5HZI2	AQTSYGFATLAEsPHTR.Q5HZI2	AQTSYGFATLAEsPHTR	-0.00601504	0.982248	0.985599	Q5HZI2 1xPhospho [S153]	S153	0.555094	C2cd4c
Q5PR69	HsLDGSk.Q5PR69	HsLDGSk	0.789474	4.82234e-05	0.000191672	Q5PR69 1xPhospho [S1046]	S1046	-3.22398	Crad
Q5PR69	ETAQTDsPQPQER.Q5PR69	ETAQTDsPQPQER	0.682707	0.00123879	0.00311087	Q5PR69 1xPhospho [S487]	S487	-3.22398	Crad
Q5PR69	VNLsPVTPAk.Q5PR69	VNLsPVTPAk	0.732331	0.000360143	0.00108504	Q5PR69 1xPhospho [S552]	S552	-3.22398	Crad
Q5PR69	kPALsPR.Q5PR69	kPALsPR	0.912782	3.00375e-06	2.15301e-05	Q5PR69 1xPhospho [S892]	S892	-3.22398	Crad
Q5RJI5	smEVLSITDAGSGGSPVPTRR.Q5RJI5	smEVLSITDAGSGGSPVPTRR	0.109774	0.644162	0.695601	Q5RJI5 1xPhospho [S399]	S399	0.246063	Brsk1
Q5RJI5	SVSGASTGLSSsPLSSPR.Q5RJI5	SVSGASTGLSSsPLSSPR	0.0586466	0.806535	0.83824	Q5RJI5 1xPhospho [S443]	S443	0.246063	Brsk1
Q5RJI5	GGGsPTSk.Q5RJI5	GGGsPTSk	0.380451	0.0988034	0.138963	Q5RJI5 1xPhospho [S470]	S470	0.246063	Brsk1
Q5SNZ0	SSsQENLLDEVmk.Q5SNZ0	SSsQENLLDEVmk	0.851128	0	0	Q5SNZ0 1xPhospho [S1704]	S1704	-1.79872	Ccdc88a
Q5SNZ0	mkAGsPGSEVVTLQQFLEESNk.Q5SNZ0	mkAGsPGSEVVTLQQFLEESNk	0.12782	0.590056	0.64818	Q5SNZ0 1xPhospho [S1677]	S1677	-1.79872	Ccdc88a
Q5SNZ0	VHASRPAsLDSGR.Q5SNZ0	VHASRPAsLDSGR	0.490226	0.0297617	0.0490745	Q5SNZ0 1xPhospho [S1588]	S1588	-1.79872	Ccdc88a
Q5SP85	HSGGsPEHLQk.Q5SP85	HSGGsPEHLQk	0.533835	0.0167341	0.0295389	Q5SP85 1xPhospho [S330]	S330	0.937026	Ccdc85a
Q5SP85	HASGSGGSGGGsREGTLR.Q5SP85	HASGSGGSGGGsREGTLR	0.267669	0.252834	0.312293	Q5SP85 1xPhospho [S380]	S380	0.937026	Ccdc85a
Q5SP85	GTsPEHLk.Q5SP85	GTsPEHLk	0.42406	0.0637317	0.0946124	Q5SP85 1xPhospho [S353]	S353	0.937026	Ccdc85a
Q5SP85	HALGGsLEHLPR.Q5SP85	HALGGsLEHLPR	0.308271	0.185682	0.240589	Q5SP85 1xPhospho [S342]	S342	0.937026	Ccdc85a
Q5SP85	HPHPGSsPEVLPk.Q5SP85	HPHPGSsPEVLPk	-0.0601504	0.801607	0.834224	Q5SP85 1xPhospho [S296]	S296	0.937026	Ccdc85a
Q5SRX1	AAETVPDLPsPPTEAPAPASNTSTR.Q5SRX1	AAETVPDLPsPPTEAPAPASNTSTR	0.196992	0.403442	0.468789	Q5SRX1 1xPhospho [S479]	S479	1.12239	Tom1l2
Q5SRX1	GIEFPmADLDALsPIHTPQR.Q5SRX1	GIEFPmADLDALsPIHTPQR	0.321805	0.166343	0.219398	Q5SRX1 1xPhospho [S160]	S160	1.12239	Tom1l2
Q5SSL4	TAVTtPkGETR.Q5SSL4	TAVTtPkGETR	0.863158	0	0	Q5SSL4 1xPhospho [T294]	T294	1.09508	Abr
Q5SSM3	HSATDkRDsEEESESTAL.Q5SSM3	HSATDkRDsEEESESTAL	0.929323	4.78536e-06	2.94763e-05	Q5SSM3 1xPhospho [S805]	S805	2.37638	Arhgap44
Q5SSM3	GSPGSIQGTPcPGTQLGPQPAASPSQLPADQsPHTLR.Q5SSM3	GSPGSIQGTPcPGTQLGPQPAASPSQLPADQsPHTLR	-0.0451128	0.851188	0.872699	Q5SSM3 1xPhospho [S636]	S636	2.37638	Arhgap44
Q5SV85	TADSVsPLEPPTkDTFPSAFASGAAQQTQTQVk.Q5SV85	TADSVsPLEPPTkDTFPSAFASGAAQQTQTQVk	0.52782	0.0181883	0.0317485	Q5SV85 1xPhospho [S576]	S576	-0.365717	Synrg
Q5SVL6	SHsmETmVGSQR.Q5SVL6	SHsmETmVGSQR	0.515789	0.0214037	0.0367881	Q5SVL6 1xPhospho [S488]	S488	1.75452	Rap1gap2
Q5SVL6	kQELANSSDVTLPDRPLsPPLTAPPTmk.Q5SVL6	kQELANSSDVTLPDRPLsPPLTAPPTmk	0.891729	9.31678e-08	9.28915e-07	Q5SVL6 1xPhospho [S26]	S26	1.75452	Rap1gap2
Q5SVL6	sGLFPR.Q5SVL6	sGLFPR	0.821053	5.69638e-06	3.22202e-05	Q5SVL6 1xPhospho [S545]	S545	1.75452	Rap1gap2
Q5SW75	AITELVsPDIImQSHSENAISVk.Q5SW75	AITELVsPDIImQSHSENAISVk	0.715789	0.000562121	0.00157649	Q5SW75 1xPhospho [S734]	S734	-1.54738	Ssh2
Q5SW75	IPHSSsSENIR.Q5SW75	IPHSSsSENIR	0.421053	0.0657879	0.0974192	Q5SW75 1xPhospho [S1217]	S1217	-1.54738	Ssh2
Q5SW75	sISESFLTVk.Q5SW75	sISESFLTVk	0.627068	0.00378742	0.00819853	Q5SW75 1xPhospho [S36]	S36	-1.54738	Ssh2
Q5SW75	SAsLAk.Q5SW75	SAsLAk	0.912782	3.00375e-06	2.15301e-05	Q5SW75 1xPhospho [S1259]	S1259	-1.54738	Ssh2
Q5SWP3	EFPALEQkDEDsLEEDAQRAPGSGQR.Q5SWP3	EFPALEQkDEDsLEEDAQRAPGSGQR	0.657143	0.00212785	0.00498688	Q5SWP3 1xPhospho [S1268]	S1268	-1.77838	Nacad
Q5SXA9	LQALRsLSGTPR.Q5SXA9	LQALRsLSGTPR	0.690226	0.00104547	0.00269735	Q5SXA9 1xPhospho [S523]	S523	-1.28523	Wwc1
Q5SXA9	LNRSDsDSSTLSk.Q5SXA9	LNRSDsDSSTLSk	0.804511	2.17922e-05	9.5845e-05	Q5SXA9 1xPhospho [S939]	S939	-1.28523	Wwc1
Q5SXA9	sLSGTPR.Q5SXA9	sLSGTPR	0.77594	8.58336e-05	0.000319062	Q5SXA9 1xPhospho [S523]	S523	-1.28523	Wwc1
Q60575	SGLsLEELR.Q60575	SGLsLEELR	-0.308271	0.185682	0.240589	Q60575 1xPhospho [S1057]	S1057	-0.520858	Kif1b
Q60575	mADTGsPGmQR.Q60575	mADTGsPGmQR	0.360902	0.118522	0.162803	Q60575 1xPhospho [S1454]	S1454	-0.520858	Kif1b
Q60575	IVEGQGQSSEVIsPPEEVNR.Q60575	IVEGQGQSSEVIsPPEEVNR	0.35188	0.128536	0.174925	Q60575 1xPhospho [S1075]	S1075	-0.520858	Kif1b
Q60598	AkkQtPPASPSPQPIEDRPPSSPIYEDAAPFk.Q60598	AkkQtPPASPSPQPIEDRPPSSPIYEDAAPFk	0.503759	0.0250626	0.0422437	Q60598 2xPhospho [T401; S/Y]	T401	0.0991521	Cttn
Q60668	NEEDEGHSNSsPR.Q60668	NEEDEGHSNSsPR	0.556391	0.0120956	0.0223049	Q60668 1xPhospho [S83]	S83	-1.83742	Hnrnpd
Q60829	ATLSEPGEEPQHPsPP.Q60829	ATLSEPGEEPQHPsPP	0.437594	0.0550843	0.0832991	Q60829 1xPhospho [S192]	S192	1.59415	Ppp1r1b
Q60829	AVQHLQTISNLSENQAsEEEDELGELR.Q60829	AVQHLQTISNLSENQAsEEEDELGELR	-0.58797	0.00741417	0.0146724	Q60829 1xPhospho [S97]	S97	1.59415	Ppp1r1b
Q60829	VSEHSsPEEEASPHQR.Q60829	VSEHSsPEEEASPHQR	0.506767	0.024104	0.0408327	Q60829 1xPhospho [S46]	S46	1.59415	Ppp1r1b
Q60875	ANsRDGEAGR.Q60875	ANsRDGEAGR	0.948872	6.09343e-06	3.34996e-05	Q60875 1xPhospho [S781]	S781	1.01835	Arhgef2
Q60875	LEsFESLR.Q60875	LEsFESLR	0.819549	6.73162e-06	3.38451e-05	Q60875 1xPhospho [S646]	S646	1.01835	Arhgef2
Q60875	LsPPHSPR.Q60875	LsPPHSPR	0.556391	0.0120956	0.0223049	Q60875 1xPhospho [S955]	S955	1.01835	Arhgef2
Q60875	LEsFESLRGER.Q60875	LEsFESLRGER	0.875188	0	0	Q60875 1xPhospho [S646]	S646	1.01835	Arhgef2
Q60875	LQDSSDPDTGSEEEVSSRLsPPHSPR.Q60875	LQDSSDPDTGSEEEVSSRLsPPHSPR	0.809023	1.62733e-05	7.46413e-05	Q60875 1xPhospho [S955]	S955	1.01835	Arhgef2
Q60875	AAVASVtPEkQATELALLQR.Q60875	AAVASVtPEkQATELALLQR	-0.043609	0.85618	0.877053	Q60875 1xPhospho [T795]	T795	1.01835	Arhgef2
Q60902	TVFAGAVPVLPAsPPPk.Q60902	TVFAGAVPVLPAsPPPk	-0.285714	0.221267	0.279614	Q60902 1xPhospho [S229]	S229	0.882643	Eps15l1
Q60902	GIDPPQVLsPDmVPPSER.Q60902	GIDPPQVLsPDmVPPSER	-0.532331	0.0170885	0.0300517	Q60902 1xPhospho [S353]	S353	0.882643	Eps15l1
Q60902	STPSHGSVSSLNSTGSLsPk.Q60902	STPSHGSVSSLNSTGSLsPk	0.0556391	0.816412	0.845146	Q60902 1xPhospho [S255]	S255	0.882643	Eps15l1
Q60932	LTFDSSFsPNTGkk.Q60932	LTFDSSFsPNTGkk	0.95188	6.21726e-06	3.38235e-05	Q60932 1xPhospho [S117]	S117	1.89092	Vdac1
Q60932	LTFDSSFsPNTGk.Q60932	LTFDSSFsPNTGk	0.580451	0.00836368	0.0162777	Q60932 1xPhospho [S117]	S117	1.89092	Vdac1
Q61037	ITVPPEGPLPSSSPRsPSGLRPR.Q61037	ITVPPEGPLPSSSPRsPSGLRPR	-0.254135	0.278347	0.339881	Q61037 1xPhospho [S1455]	S1455	0.212307	Tsc2
Q61037	sPSGLRPR.Q61037	sPSGLRPR	0.0481203	0.841221	0.865876	Q61037 1xPhospho [S1455]	S1455	0.212307	Tsc2
Q61037	ASGPLsPPTGPPSPVPmGPAVR.Q61037	ASGPLsPPTGPPSPVPmGPAVR	-0.389474	0.0905761	0.128933	Q61037 1xPhospho [S664]	S664	0.212307	Tsc2
Q61037	SQsGILDGEAATWSATGEESR.Q61037	SQsGILDGEAATWSATGEESR	-0.255639	0.275434	0.337024	Q61037 1xPhospho [S1421]	S1421	0.212307	Tsc2
Q61037	SmsGGHGLR.Q61037	SmsGGHGLR	0.273684	0.242002	0.30065	Q61037 1xPhospho [S1132]	S1132	0.212307	Tsc2
Q61037	SIsVSEHVVR.Q61037	SIsVSEHVVR	-0.38797	0.0919103	0.130595	Q61037 1xPhospho [S981]	S981	0.212307	Tsc2
Q61037	IDIGRLsPEAk.Q61037	IDIGRLsPEAk	0.475188	0.0357808	0.0579039	Q61037 1xPhospho [S1412]	S1412	0.212307	Tsc2
Q61037	kASGPLsPPTGPPSPVPmGPAVR.Q61037	kASGPLsPPTGPPSPVPmGPAVR	-0.569925	0.00985866	0.0187833	Q61037 1xPhospho [S664]	S664	0.212307	Tsc2
Q61097	TDVLGVHEAEAEEPEAGksEAEDDEEDEVDDLPSSR.Q61097	TDVLGVHEAEAEEPEAGksEAEDDEEDEVDDLPSSR	-0.0285714	0.906366	0.919654	Q61097 1xPhospho [S518]	S518	0.0996539	Ksr1
Q61097	SksHESQLGNR.Q61097	SksHESQLGNR	-0.0661654	0.781972	0.818133	Q61097 1xPhospho [S297]	S297	0.0996539	Ksr1
Q61136	ARsPAEEk.Q61136	ARsPAEEk	0.633083	0.00339037	0.0074696	Q61136 1xPhospho [S258]	S258	-0.898975	Prpf4b
Q61136	kksPIVNER.Q61136	kksPIVNER	0.57594	0.00897977	0.0172485	Q61136 1xPhospho [S278]	S278	-0.898975	Prpf4b
Q61136	LcDFGSASHVADNDITPyLVSR.Q61136	LcDFGSASHVADNDITPyLVSR	0.529323	0.0178155	0.0311672	Q61136 1xPhospho [Y849]	Y849	-0.898975	Prpf4b
Q61140	HLLAPGPQDIyDVPPVR.Q61140	HLLAPGPQDIyDVPPVR	0.118797	0.616865	0.671983	Q61140 1xPhospho [Y253]	Y253	-0.408051	Bcar1
Q61140	VGQGYVYEAAQTEQDEyDTPR.Q61140	VGQGYVYEAAQTEQDEyDTPR	0.372932	0.106075	0.148039	Q61140 1xPhospho [Y238]	Y238	-0.408051	Bcar1
Q61165	IGsDPLAYEPk.Q61165	IGsDPLAYEPk	0.861654	0	0	Q61165 1xPhospho [S707]	S707	3.22158	Slc9a1
Q61234	QPSsPGPQPR.Q61234	QPSsPGPQPR	0.461654	0.0419875	0.0661733	Q61234 1xPhospho [S195]	S195	1.35596	Snta1
Q61290	SFsTIR.Q61290	SFsTIR	-0.545865	0.0141083	0.0254577	Q61290 1xPhospho [S1982]	S1982	0.950962	Cacna1e
Q61290	kHLLsPDVSR.Q61290	kHLLsPDVSR	0.284211	0.223792	0.282047	Q61290 1xPhospho [S2054]	S2054	0.950962	Cacna1e
Q61290	FGEAVVVGRPGsGDGDSDQSR.Q61290	FGEAVVVGRPGsGDGDSDQSR	0.757895	0.000164795	0.000552367	Q61290 1xPhospho [S15]	S15	0.950962	Cacna1e
Q61290	HLLsPDVSR.Q61290	HLLsPDVSR	0.44812	0.0490119	0.0752283	Q61290 1xPhospho [S2054]	S2054	0.950962	Cacna1e
Q61290	GTQADWEsPERR.Q61290	GTQADWEsPERR	0.425564	0.0627223	0.0931728	Q61290 1xPhospho [S2073]	S2073	0.950962	Cacna1e
Q61290	GGsLkGDIGGLTSALDNQR.Q61290	GGsLkGDIGGLTSALDNQR	0.118797	0.616865	0.671983	Q61290 1xPhospho [S856]	S856	0.950962	Cacna1e
Q61301	TPEELEDDsDFEQEDYDVR.Q61301	TPEELEDDsDFEQEDYDVR	0.446617	0.0498458	0.0763092	Q61301 1xPhospho [S640]	S640	-0.402764	Ctnna2
Q61301	QVQEAIAGISSAAQATsPTDEAk.Q61301	QVQEAIAGISSAAQATsPTDEAk	-0.380451	0.0988034	0.138963	Q61301 1xPhospho [S262]	S262	-0.402764	Ctnna2
Q61301	HIsPVQALSEFk.Q61301	HIsPVQALSEFk	0.649624	0.00247148	0.00567355	Q61301 1xPhospho [S939]	S939	-0.402764	Ctnna2
Q61315	TGsSSSILSASSESSEk.Q61315	TGsSSSILSASSESSEk	0.547368	0.0138052	0.0250066	Q61315 1xPhospho [S2569]	S2569	-0.889946	Apc
Q61315	NDsLSSLDFDDDDVDLSREk.Q61315	NDsLSSLDFDDDDVDLSREk	0.418045	0.0678948	0.100286	Q61315 1xPhospho [S1859]	S1859	-0.889946	Apc
Q61315	TPASksPSEGPGATTSPR.Q61315	TPASksPSEGPGATTSPR	0.395489	0.0853843	0.12273	Q61315 1xPhospho [S2260]	S2260	-0.889946	Apc
Q61315	RTGsSSSILSASSESSEk.Q61315	RTGsSSSILSASSESSEk	0.595489	0.00655513	0.013251	Q61315 1xPhospho [S2569]	S2569	-0.889946	Apc
Q61315	AVEFSSGAksPSk.Q61315	AVEFSSGAksPSk	0.254135	0.278347	0.339881	Q61315 1xPhospho [S1359]	S1359	-0.889946	Apc
Q61315	LNsFVQVEAPEQk.Q61315	LNsFVQVEAPEQk	0.4	0.0816402	0.11807	Q61315 1xPhospho [S2726]	S2726	-0.889946	Apc
Q61315	QSVGSGsPVQTVGLETR.Q61315	QSVGSGsPVQTVGLETR	0.729323	0.000391689	0.00116516	Q61315 1xPhospho [S2713]	S2713	-0.889946	Apc
Q61315	YkDANImsPGSSLPSLHVR.Q61315	YkDANImsPGSSLPSLHVR	0.637594	0.00311567	0.00694899	Q61315 1xPhospho [S742]	S742	-0.889946	Apc
Q61315	SPSEGPGATTsPR.Q61315	SPSEGPGATTsPR	0.305263	0.190182	0.245743	Q61315 1xPhospho [S2270]	S2270	-0.889946	Apc
Q61315	SktPPPPPQTVQAk.Q61315	SktPPPPPQTVQAk	0.866165	0	0	Q61315 1xPhospho [T1437]	T1437	-0.889946	Apc
Q61315	SEsASk.Q61315	SEsASk	0.503759	0.0250626	0.0422437	Q61315 1xPhospho [S2396]	S2396	-0.889946	Apc
Q61315	SGAQTPksPPEHYVQETPLVFSR.Q61315	SGAQTPksPPEHYVQETPLVFSR	0.494737	0.0281232	0.0465685	Q61315 1xPhospho [S1370]	S1370	-0.889946	Apc
Q61315	HSsPSGTVAAR.Q61315	HSsPSGTVAAR	0.736842	0.000316639	0.000981622	Q61315 1xPhospho [S2774]	S2774	-0.889946	Apc
Q61315	EAPsPTLR.Q61315	EAPsPTLR	0.726316	0.000425399	0.00124498	Q61315 1xPhospho [S2449]	S2449	-0.889946	Apc
Q61315	NDsLSSLDFDDDDVDLSR.Q61315	NDsLSSLDFDDDDVDLSR	0.520301	0.0201482	0.0347571	Q61315 1xPhospho [S1859]	S1859	-0.889946	Apc
Q61315	QAsLSk.Q61315	QAsLSk	0.593985	0.00672003	0.0135379	Q61315 1xPhospho [S2383]	S2383	-0.889946	Apc
Q61315	QLsQQNLTk.Q61315	QLsQQNLTk	0.348872	0.132007	0.17913	Q61315 1xPhospho [S2374]	S2374	-0.889946	Apc
Q61315	LQASGLsSESTR.Q61315	LQASGLsSESTR	0.309774	0.18346	0.238366	Q61315 1xPhospho [S1341]	S1341	-0.889946	Apc
Q61315	SELsPITR.Q61315	SELsPITR	0.604511	0.00563412	0.0116494	Q61315 1xPhospho [S2283]	S2283	-0.889946	Apc
Q61316	AFsDPFVEAEk.Q61316	AFsDPFVEAEk	0.106767	0.653365	0.704246	Q61316 1xPhospho [S76]	S76	0.433516	Hspa4
Q61361	ELETPsEEkSGR.Q61361	ELETPsEEkSGR	0.86015	0	0	Q61361 1xPhospho [S587]	S587	3.0884	Bcan
Q61644	GRLDsGQLGLYPANYVEAI.Q61644	GRLDsGQLGLYPANYVEAI	0.669173	0.00166035	0.00399877	Q61644 1xPhospho [S427]	S427	5.06926	Pacsin1
Q61644	TEQSVtPEQQk.Q61644	TEQSVtPEQQk	0.837594	0	0	Q61644 1xPhospho [T181]	T181	5.06926	Pacsin1
Q61644	TEQSVtPEQQkk.Q61644	TEQSVtPEQQkk	0.974436	6.56064e-06	3.38235e-05	Q61644 1xPhospho [T181]	T181	5.06926	Pacsin1
Q61699	IEsPkLER.Q61699	IEsPkLER	0.730827	0.000375653	0.00112314	Q61699 1xPhospho [S810]	S810	0.0965522	Hsph1
Q61771	DYEGPAIsPk.Q61771	DYEGPAIsPk	0.899248	1.18028e-06	1.0286e-05	Q61771 1xPhospho [S681]	S681	-1.02945	Kif3b
Q61879	TSDVNDTQPPQsE.Q61879	TSDVNDTQPPQsE	0.270677	0.247379	0.306521	Q61879 1xPhospho [S1975]	S1975	0.173236	Myh10
Q61937	cGSGPVHISGQHLVAVEEDAEsEDEDEEDVk.Q61937	cGSGPVHISGQHLVAVEEDAEsEDEDEEDVk	-0.218045	0.354116	0.420189	Q61937 1xPhospho [S125]	S125	-1.98714	Npm1
Q62048	YkDIIRQPsEEEIIk.Q62048	YkDIIRQPsEEEIIk	-0.269173	0.250097	0.3094	Q62048 1xPhospho [S116]	S116	0.59814	Pea15
Q62077	EGsFEAR.Q62077	EGsFEAR	0.0390977	0.871187	0.889715	Q62077 1xPhospho [S1248]	S1248	-0.426355	Plcg1
Q62108	RYsPVAkDLLGEEDIPREPR.Q62108	RYsPVAkDLLGEEDIPREPR	-0.434586	0.0569223	0.0855289	Q62108 1xPhospho [S295]	S295	1.56911	Dlg4
Q62108	RYsPVAk.Q62108	RYsPVAk	0.765414	0.000127184	0.000444012	Q62108 1xPhospho [S295]	S295	1.56911	Dlg4
Q62108	EQLmNSsLGSGTASLR.Q62108	EQLmNSsLGSGTASLR	-0.490226	0.0297617	0.0490745	Q62108 1xPhospho [S415]	S415	1.56911	Dlg4
Q62188	GsPTRPNPPVR.Q62188	GsPTRPNPPVR	0.661654	0.00194129	0.00460934	Q62188 1xPhospho [S522]	S522	-2.20394	Dpysl3
Q62188	SNITSLs.Q62188	SNITSLs	0.849624	0	0	Q62188 1xPhospho [S570]	S570	-2.20394	Dpysl3
Q62188	GGtPAGSTR.Q62188	GGtPAGSTR	0.621053	0.00422208	0.0090232	Q62188 1xPhospho [T514]	T514	-2.20394	Dpysl3
Q62261	EkLtGLHk.Q62261	EkLtGLHk	0.807519	1.80072e-05	8.10153e-05	Q62261 1xPhospho [T1356]	T1356	1.20123	Sptbn1
Q62261	AQTLPTSVVTITSESsPGkR.Q62261	AQTLPTSVVTITSESsPGkR	0.687218	0.00111959	0.00287598	Q62261 1xPhospho [S2340]	S2340	1.20123	Sptbn1
Q62261	ESSPVPsPTLDRk.Q62261	ESSPVPsPTLDRk	0.849624	0	0	Q62261 1xPhospho [S2168]	S2168	1.20123	Sptbn1
Q62261	RRPPsPDPNTk.Q62261	RRPPsPDPNTk	0.790977	4.49369e-05	0.000180438	Q62261 1xPhospho [S2102]	S2102	1.20123	Sptbn1
Q62261	RPPsPDPNTkVSEEAESQQWDTSk.Q62261	RPPsPDPNTkVSEEAESQQWDTSk	0.786466	5.52894e-05	0.000215391	Q62261 1xPhospho [S2102]	S2102	1.20123	Sptbn1
Q62261	RFsLFGk.Q62261	RFsLFGk	0.545865	0.0141083	0.0254577	Q62261 1xPhospho [S2357]	S2357	1.20123	Sptbn1
Q62261	GDQVSQNGLPAEQGsPR.Q62261	GDQVSQNGLPAEQGsPR	0.278195	0.234082	0.292976	Q62261 1xPhospho [S2137]	S2137	1.20123	Sptbn1
Q62261	RPPsPDPNTk.Q62261	RPPsPDPNTk	0.867669	0	0	Q62261 1xPhospho [S2102]	S2102	1.20123	Sptbn1
Q62277	LHQVyFDAPScVk.Q62277	LHQVyFDAPScVk	0.670677	0.00160839	0.00388157	Q62277 1xPhospho [Y81]	Y81	3.83923	Syp
Q62318	SRsGEGEVSGLLR.Q62318	SRsGEGEVSGLLR	0.497744	0.0270715	0.0450171	Q62318 1xPhospho [S473]	S473	-2.31406	Trim28
Q62407	SYPGsP.Q62407	SYPGsP	0.193985	0.410789	0.476621	Q62407 1xPhospho [S3261]	S3261	1.73639	Speg
Q62407	RsTSREELVR.Q62407	RsTSREELVR	0.463158	0.0412588	0.0651994	Q62407 1xPhospho [S509]	S509	1.73639	Speg
Q62407	RLsLSLSQk.Q62407	RLsLSLSQk	0.86015	0	0	Q62407 1xPhospho [S2413]	S2413	1.73639	Speg
Q62407	AAsLDER.Q62407	AAsLDER	0.86015	0	0	Q62407 1xPhospho [S481]	S481	1.73639	Speg
Q62407	SRsEERGPFR.Q62407	SRsEERGPFR	0.586466	0.00759661	0.0149455	Q62407 1xPhospho [S2361]	S2361	1.73639	Speg
Q62407	SGsSEDSGGASGR.Q62407	SGsSEDSGGASGR	0.905263	2.02107e-06	1.60121e-05	Q62407 1xPhospho [S2476]	S2476	1.73639	Speg
Q62407	SRsVQDLR.Q62407	SRsVQDLR	0.810526	1.46396e-05	6.80768e-05	Q62407 1xPhospho [S2396]	S2396	1.73639	Speg
Q62407	RGSsAESALPR.Q62407	RGSsAESALPR	0.806015	1.98455e-05	8.86081e-05	Q62407 1xPhospho [S2020]	S2020	1.73639	Speg
Q62407	ATsEGESLRR.Q62407	ATsEGESLRR	0.827068	2.24499e-06	1.72067e-05	Q62407 1xPhospho [S2499]	S2499	1.73639	Speg
Q62407	ARsLEQPk.Q62407	ARsLEQPk	0.804511	2.17922e-05	9.5845e-05	Q62407 1xPhospho [S439]	S439	1.73639	Speg
Q62407	mPsIPEEPEHGDLER.Q62407	mPsIPEEPEHGDLER	-0.318797	0.170513	0.224018	Q62407 1xPhospho [S1177]	S1177	1.73639	Speg
Q62415	RSsITEPEGPGGPNIQk.Q62415	RSsITEPEGPGGPNIQk	0.169925	0.472187	0.535965	Q62415 1xPhospho [S708]	S708	1.22019	Ppp1r13b
Q62417	sAESLLESTk.Q62417	sAESLLESTk	-0.206015	0.381848	0.448347	Q62417 1xPhospho [S722]	S722	0.422356	Sorbs1
Q62417	SGLTSARsAESLLESTk.Q62417	SGLTSARsAESLLESTk	-0.469173	0.0384427	0.0614509	Q62417 1xPhospho [S722]	S722	0.422356	Sorbs1
Q62417	SATVsPQQPQAQQR.Q62417	SATVsPQQPQAQQR	-0.386466	0.0932592	0.132431	Q62417 1xPhospho [S1209]	S1209	0.422356	Sorbs1
Q62417	VGGsIENLLmR.Q62417	VGGsIENLLmR	-0.6	0.00608027	0.01243	Q62417 1xPhospho [S576]	S576	0.422356	Sorbs1
Q62417	LSksPTPVLSR.Q62417	LSksPTPVLSR	-0.466165	0.0398311	0.0633689	Q62417 1xPhospho [S707]	S707	0.422356	Sorbs1
Q62418	LRsPFLQk.Q62418	LRsPFLQk	0.470677	0.037763	0.0606115	Q62418 1xPhospho [S291]	S291	-0.341604	Dbnl
Q62419	ITASSsFR.Q62419	ITASSsFR	-0.333835	0.150383	0.20128	Q62419 1xPhospho [S288]	S288	0.132637	Sh3gl1
Q62448	TQtPPLGQTPQLGLk.Q62448	TQtPPLGQTPQLGLk	0.8	2.83262e-05	0.000119877	Q62448 1xPhospho [T507]	T507	-1.77206	Eif4g2
Q62523	sPGGPGPLTLk.Q62523	sPGGPGPLTLk	0.0721805	0.762467	0.802363	Q62523 1xPhospho [S336]	S336	-0.678724	Zyx
Q63844	IADPEHDHTGFLTEyVATR.Q63844	IADPEHDHTGFLTEyVATR	-0.491729	0.0292073	0.0482617	Q63844 1xPhospho [Y205]	Y205	-0.534693	Mapk3
Q64012	GRLsPVPVPR.Q64012	GRLsPVPVPR	0.395489	0.0853843	0.12273	Q64012 1xPhospho [S135]	S135	-1.39386	Raly
Q64096	SSsAQcLSSSGk.Q64096	SSsAQcLSSSGk	0.273684	0.242002	0.30065	Q64096 1xPhospho [S1120]	S1120	-0.620714	Mcf2l
Q641K1	VTsPTTYVLDEDEPR.Q641K1	VTsPTTYVLDEDEPR	0.796992	3.33058e-05	0.00013773	Q641K1 1xPhospho [S1160]	S1160	-1.28896	Agtpbp1
Q641P0	HNPVFGVms.Q641P0	HNPVFGVms	0.562406	0.0110552	0.0207108	Q641P0 1xPhospho [S418]	S418	2.16584	Actr3b
Q64332	TPALsPQRPLTTQQPQSGTLk.Q64332	TPALsPQRPLTTQQPQSGTLk	0.857143	0	0	Q64332 1xPhospho [S426]	S426	3.73126	Syn2
Q68EF6	AGGDLSLsPSR.Q68EF6	AGGDLSLsPSR	0.559398	0.0115658	0.0214964	Q68EF6 1xPhospho [S510]	S510	0.652037	Begain
Q68EF6	kDsLTk.Q68EF6	kDsLTk	0.76391	0.000134123	0.000461392	Q68EF6 1xPhospho [S588]	S588	0.652037	Begain
Q68EF6	RPsVDTPVTDVGFLR.Q68EF6	RPsVDTPVTDVGFLR	0.792481	4.18073e-05	0.000169901	Q68EF6 1xPhospho [S246]	S246	0.652037	Begain
Q68EF6	AQLyGTLLN.Q68EF6	AQLyGTLLN	0.0300752	0.901328	0.916915	Q68EF6 1xPhospho [Y595]	Y595	0.652037	Begain
Q68EF6	YYGGGGGGGAAGGGsPGDkAEGR.Q68EF6	YYGGGGGGGAAGGGsPGDkAEGR	0.86015	0	0	Q68EF6 1xPhospho [S463]	S463	0.652037	Begain
Q68FD5	GILRtPDTIRR.Q68FD5	GILRtPDTIRR	0.77594	8.58336e-05	0.000319062	Q68FD5 1xPhospho [T394]	T394	2.22166	Cltc
Q68FD5	GILRtPDTIR.Q68FD5	GILRtPDTIR	0.876692	0	0	Q68FD5 1xPhospho [T394]	T394	2.22166	Cltc
Q68FE6	FSTYSQsPPDTPSLR.Q68FE6	FSTYSQsPPDTPSLR	0.390977	0.0892565	0.127517	Q68FE6 1xPhospho [S347]	S347	-1.23585	Ripor1
Q68FF6	HGsGADSDYENTQSGDPLLGLEGk.Q68FF6	HGsGADSDYENTQSGDPLLGLEGk	0.470677	0.037763	0.0606115	Q68FF6 1xPhospho [S601]	S601	0.668989	Git1
Q68FF6	SQSELDDQHDYDSVAsDEDTDQEPLPSAGATR.Q68FF6	SQSELDDQHDYDSVAsDEDTDQEPLPSAGATR	0.870677	0	0	Q68FF6 1xPhospho [S397]	S397	0.668989	Git1
Q68FF6	HGsGADSDYENTQSGDPLLGLEGkR.Q68FF6	HGsGADSDYENTQSGDPLLGLEGkR	0.896241	7.48063e-07	6.90272e-06	Q68FF6 1xPhospho [S601]	S601	0.668989	Git1
Q68FH0	RVGsVTSR.Q68FH0	RVGsVTSR	-0.190977	0.41821	0.483325	Q68FH0 1xPhospho [S289]	S289	0.250894	Pkp4
Q68FH0	LYLQsPR.Q68FH0	LYLQsPR	0.815038	1.03015e-05	5.03938e-05	Q68FH0 1xPhospho [S1133]	S1133	0.250894	Pkp4
Q68FH0	VGsPLTLTDAQTR.Q68FH0	VGsPLTLTDAQTR	0.499248	0.0265576	0.0442877	Q68FH0 1xPhospho [S313]	S313	0.250894	Pkp4
Q68FH0	GLYPGSSkPsPIYISSYSSPAR.Q68FH0	GLYPGSSkPsPIYISSYSSPAR	0.190977	0.41821	0.483325	Q68FH0 1xPhospho [S1090]	S1090	0.250894	Pkp4
Q68FH0	TYYsPVYR.Q68FH0	TYYsPVYR	0.676692	0.00141371	0.00347592	Q68FH0 1xPhospho [S421]	S421	0.250894	Pkp4
Q68FH0	VAsPSQGQVGSSSPk.Q68FH0	VAsPSQGQVGSSSPk	0.760902	0.000148858	0.00050543	Q68FH0 1xPhospho [S326]	S326	0.250894	Pkp4
Q68FH0	AASPYSQRPAsPTAVR.Q68FH0	AASPYSQRPAsPTAVR	0.72782	0.000408267	0.00120685	Q68FH0 1xPhospho [S280]	S280	0.250894	Pkp4
Q68FH0	TGsVGIGNLQR.Q68FH0	TGsVGIGNLQR	0.0556391	0.816412	0.845146	Q68FH0 1xPhospho [S446]	S446	0.250894	Pkp4
Q68FH0	AQSPSYVTSTGVSPSRGsLR.Q68FH0	AQSPSYVTSTGVSPSRGsLR	0.145865	0.538014	0.59969	Q68FH0 1xPhospho [S235]	S235	0.250894	Pkp4
Q68FH0	AASPYSQRPAsPTAVRR.Q68FH0	AASPYSQRPAsPTAVRR	0.350376	0.130263	0.17707	Q68FH0 1xPhospho [S280]	S280	0.250894	Pkp4
Q69Z98	smEVLSVTDGGSPVPAR.Q69Z98	smEVLSVTDGGSPVPAR	-0.293233	0.208932	0.266027	Q69Z98 1xPhospho [S383]	S383	1.01314	Brsk2
Q69ZH9	HYsQDcSSIk.Q69ZH9	HYsQDcSSIk	0.896241	7.48063e-07	6.90272e-06	Q69ZH9 1xPhospho [S594]	S594	-0.836703	Arhgap23
Q69ZH9	SYsPSFQR.Q69ZH9	SYsPSFQR	0.885714	0	0	Q69ZH9 1xPhospho [S421]	S421	-0.836703	Arhgap23
Q69ZH9	SkscDDGLNTFRDEGR.Q69ZH9	SkscDDGLNTFRDEGR	0.831579	2.99428e-07	2.96031e-06	Q69ZH9 1xPhospho [S619]	S619	-0.836703	Arhgap23
Q69ZH9	RLPsRVPsLR.Q69ZH9	RLPsRVPsLR	0.685714	0.00115823	0.00294949	Q69ZH9 2xPhospho [S639; S643]	S639	-0.836703	Arhgap23
Q69ZH9	LPSRVPsLR.Q69ZH9	LPSRVPsLR	0.742857	0.000265205	0.000836499	Q69ZH9 1xPhospho [S643]	S643	-0.836703	Arhgap23
Q69ZH9	QmNLGFGDEsPEPEAR.Q69ZH9	QmNLGFGDEsPEPEAR	0.562406	0.0110552	0.0207108	Q69ZH9 1xPhospho [S515]	S515	-0.836703	Arhgap23
Q69ZH9	ARsDDYLSR.Q69ZH9	ARsDDYLSR	0.790977	4.49369e-05	0.000180438	Q69ZH9 1xPhospho [S351]	S351	-0.836703	Arhgap23
Q69ZH9	ADSsPk.Q69ZH9	ADSsPk	0.505263	0.0245795	0.0415784	Q69ZH9 1xPhospho [S839]	S839	-0.836703	Arhgap23
Q69ZH9	RSsYLLAITTER.Q69ZH9	RSsYLLAITTER	0.786466	5.52894e-05	0.000215391	Q69ZH9 1xPhospho [S607]	S607	-0.836703	Arhgap23
Q69ZR2	SSsDNNTNTLGR.Q69ZR2	SSsDNNTNTLGR	-0.111278	0.63958	0.691923	Q69ZR2 1xPhospho [S1576]	S1576	-0.464496	Hectd1
Q69ZR2	RLDsSGER.Q69ZR2	RLDsSGER	0.64812	0.00254541	0.00583188	Q69ZR2 1xPhospho [S357]	S357	-0.464496	Hectd1
Q69ZS0	STPLTLEIsPDNSLR.Q69ZS0	STPLTLEIsPDNSLR	0.38797	0.0919103	0.130595	Q69ZS0 1xPhospho [S775]	S775	-1.46083	Pdzrn3
Q69ZS0	mNsQDkLGLTVcYR.Q69ZS0	mNsQDkLGLTVcYR	0.855639	0	0	Q69ZS0 1xPhospho [S427]	S427	-1.46083	Pdzrn3
Q69ZS0	STPLTLEIsPDNSLRR.Q69ZS0	STPLTLEIsPDNSLRR	0.83609	0	0	Q69ZS0 1xPhospho [S775]	S775	-1.46083	Pdzrn3
Q69ZS8	VsPcHSR.Q69ZS8	VsPcHSR	-0.081203	0.733476	0.778119	Q69ZS8 1xPhospho [S314]	S314	-0.936131	Kazn
Q69ZS8	QVRVsPcHSR.Q69ZS8	QVRVsPcHSR	0.413534	0.0711515	0.104441	Q69ZS8 1xPhospho [S314]	S314	-0.936131	Kazn
Q69ZW3	sIQEDTk.Q69ZW3	sIQEDTk	0.46015	0.0427264	0.0670235	Q69ZW3 1xPhospho [S1038]	S1038	-1.05294	Ehbp1
Q69ZW3	QRsIQEDTk.Q69ZW3	QRsIQEDTk	0.732331	0.000360143	0.00108504	Q69ZW3 1xPhospho [S1038]	S1038	-1.05294	Ehbp1
Q69ZW3	SRsLEcR.Q69ZW3	SRsLEcR	0.263158	0.261163	0.321905	Q69ZW3 1xPhospho [S747]	S747	-1.05294	Ehbp1
Q69ZX8	SAsLPAYR.Q69ZX8	SAsLPAYR	-0.111278	0.63958	0.691923	Q69ZX8 1xPhospho [S584]	S584	-0.228166	Ablim3
Q69ZX8	SktSEDISQASk.Q69ZX8	SktSEDISQASk	0.162406	0.492298	0.554513	Q69ZX8 1xPhospho [T460]	T460	-0.228166	Ablim3
Q69ZX8	TSETSIsPPGSSIGSPNR.Q69ZX8	TSETSIsPPGSSIGSPNR	-0.180451	0.44476	0.508761	Q69ZX8 1xPhospho [S282]	S282	-0.228166	Ablim3
Q69ZX8	RTSETsISPPGSSIGSPNR.Q69ZX8	RTSETsISPPGSSIGSPNR	0.378947	0.100227	0.140797	Q69ZX8 2xPhospho [S280; S]	S280	-0.228166	Ablim3
Q69ZX8	ASsPGYIDSPTYSR.Q69ZX8	ASsPGYIDSPTYSR	-0.00601504	0.982248	0.985599	Q69ZX8 1xPhospho [S373]	S373	-0.228166	Ablim3
Q69ZX8	RFsSGGEEEDFDR.Q69ZX8	RFsSGGEEEDFDR	0.353383	0.126826	0.172897	Q69ZX8 1xPhospho [S502]	S502	-0.228166	Ablim3
Q69ZX8	SHYLADsDPLISk.Q69ZX8	SHYLADsDPLISk	0.407519	0.0756779	0.110328	Q69ZX8 1xPhospho [S575]	S575	-0.228166	Ablim3
Q6A065	HDDGTQsDSENAGAHR.Q6A065	HDDGTQsDSENAGAHR	0.827068	2.24499e-06	1.72067e-05	Q6A065 1xPhospho [S378]	S378	-1.69938	Cep170
Q6A065	RFPTDYASTsEDEFGSNR.Q6A065	RFPTDYASTsEDEFGSNR	0.210526	0.371305	0.437716	Q6A065 1xPhospho [S1231]	S1231	-1.69938	Cep170
Q6A065	LkGNkHDDGTQsDSENAGAHR.Q6A065	LkGNkHDDGTQsDSENAGAHR	0.888722	0	0	Q6A065 1xPhospho [S378]	S378	-1.69938	Cep170
Q6A065	LRTsPALk.Q6A065	LRTsPALk	0.83609	0	0	Q6A065 1xPhospho [S1250]	S1250	-1.69938	Cep170
Q6A065	SDsLDTDSSmDTTLILk.Q6A065	SDsLDTDSSmDTTLILk	0.789474	4.82234e-05	0.000191672	Q6A065 1xPhospho [S872]	S872	-1.69938	Cep170
Q6A065	HDDGTQsDSENAGAHRR.Q6A065	HDDGTQsDSENAGAHRR	0.834586	0	0	Q6A065 1xPhospho [S378]	S378	-1.69938	Cep170
Q6A065	LGSLSARsDSEATISR.Q6A065	LGSLSARsDSEATISR	0.849624	0	0	Q6A065 1xPhospho [S1155]	S1155	-1.69938	Cep170
Q6A065	SIksDVPVYLkR.Q6A065	SIksDVPVYLkR	0.778947	7.61096e-05	0.000286537	Q6A065 1xPhospho [S358]	S358	-1.69938	Cep170
Q6A065	LGEAsDSELADADk.Q6A065	LGEAsDSELADADk	0.72782	0.000408267	0.00120685	Q6A065 1xPhospho [S1102]	S1102	-1.69938	Cep170
Q6DFV3	SVsQERLEDSVLmk.Q6DFV3	SVsQERLEDSVLmk	-0.360902	0.118522	0.162803	Q6DFV3 1xPhospho [S453]	S453	-0.735201	Arhgap21
Q6DFV3	RNsEGSEAScTEGSLTPSLDSR.Q6DFV3	RNsEGSEAScTEGSLTPSLDSR	0.771429	0.000102087	0.000367856	Q6DFV3 1xPhospho [S1655]	S1655	-0.735201	Arhgap21
Q6DFV3	kSTsPETk.Q6DFV3	kSTsPETk	0.887218	0	0	Q6DFV3 1xPhospho [S1554]	S1554	-0.735201	Arhgap21
Q6DFV3	HVSsLk.Q6DFV3	HVSsLk	-0.437594	0.0550843	0.0832991	Q6DFV3 1xPhospho [S895]	S895	-0.735201	Arhgap21
Q6DFV3	QLsHDQESVGPPSLDGQHSSk.Q6DFV3	QLsHDQESVGPPSLDGQHSSk	0.166917	0.48018	0.542421	Q6DFV3 1xPhospho [S850]	S850	-0.735201	Arhgap21
Q6DFV3	QSLsIR.Q6DFV3	QSLsIR	-0.463158	0.0412588	0.0651994	Q6DFV3 1xPhospho [S1073]	S1073	-0.735201	Arhgap21
Q6DFV3	STsPETk.Q6DFV3	STsPETk	0.839098	0	0	Q6DFV3 1xPhospho [S1554]	S1554	-0.735201	Arhgap21
Q6DFV3	DQGEPVsPSEDEPFSWPGPk.Q6DFV3	DQGEPVsPSEDEPFSWPGPk	0.0601504	0.801607	0.834224	Q6DFV3 1xPhospho [S41]	S41	-0.735201	Arhgap21
Q6DFV3	TQSPHsPkEESER.Q6DFV3	TQSPHsPkEESER	-0.693233	0.000975399	0.00254447	Q6DFV3 1xPhospho [S1092]	S1092	-0.735201	Arhgap21
Q6DFV3	GIPsIVR.Q6DFV3	GIPsIVR	-0.290226	0.213809	0.271648	Q6DFV3 1xPhospho [S1122]	S1122	-0.735201	Arhgap21
Q6DFV3	NRsPTLScR.Q6DFV3	NRsPTLScR	0.769925	0.000107978	0.00038613	Q6DFV3 1xPhospho [S1501]	S1501	-0.735201	Arhgap21
Q6DFV3	RTsQGFGFTLR.Q6DFV3	RTsQGFGFTLR	-0.819549	6.73162e-06	3.38451e-05	Q6DFV3 1xPhospho [S62]	S62	-0.735201	Arhgap21
Q6DFV3	VGGsIRPWk.Q6DFV3	VGGsIRPWk	-0.765414	0.000127184	0.000444012	Q6DFV3 1xPhospho [S947]	S947	-0.735201	Arhgap21
Q6EDY6	IFPGLsPLR.Q6EDY6	IFPGLsPLR	0.27218	0.244681	0.303497	Q6EDY6 1xPhospho [S122]	S122	-1.43057	Carmil1
Q6EDY6	SDSRGsPQGGRR.Q6EDY6	SDSRGsPQGGRR	0.601504	0.00592843	0.0121831	Q6EDY6 1xPhospho [S1153]	S1153	-1.43057	Carmil1
Q6I6G8	ENVLPHSTsR.Q6I6G8	ENVLPHSTsR	0.384962	0.0946229	0.134125	Q6I6G8 1xPhospho [S915]	S915	0.994075	Hecw2
Q6I6G8	ANsDTDLVTSESR.Q6I6G8	ANsDTDLVTSESR	0.766917	0.000120519	0.000426438	Q6I6G8 1xPhospho [S48]	S48	0.994075	Hecw2
Q6I6G8	SNsIQQmEQLNR.Q6I6G8	SNsIQQmEQLNR	-0.108271	0.648757	0.6996	Q6I6G8 1xPhospho [S858]	S858	0.994075	Hecw2
Q6I6G8	SmGAsPk.Q6I6G8	SmGAsPk	0.783459	6.30519e-05	0.000241238	Q6I6G8 1xPhospho [S443]	S443	0.994075	Hecw2
Q6I6G8	SHsAGEVGEDSR.Q6I6G8	SHsAGEVGEDSR	0.670677	0.00160839	0.00388157	Q6I6G8 1xPhospho [S1048]	S1048	0.994075	Hecw2
Q6I6G8	SNsIQQmEQLNRR.Q6I6G8	SNsIQQmEQLNRR	0.431579	0.0588075	0.0878565	Q6I6G8 1xPhospho [S858]	S858	0.994075	Hecw2
Q6I6G8	QRsHSAGEVGEDSR.Q6I6G8	QRsHSAGEVGEDSR	0.206015	0.381848	0.448347	Q6I6G8 1xPhospho [S1046]	S1046	0.994075	Hecw2
Q6IR34	LTsPAAAEkPDLAGYEAQGARPk.Q6IR34	LTsPAAAEkPDLAGYEAQGARPk	0.866165	0	0	Q6IR34 1xPhospho [S384]	S384	-2.39225	Gpsm1
Q6IR34	VDLAGsPEQEASGLPDPQQQcPPGAS.Q6IR34	VDLAGsPEQEASGLPDPQQQcPPGAS	0.769925	0.000107978	0.00038613	Q6IR34 1xPhospho [S653]	S653	-2.39225	Gpsm1
Q6KAU4	LPPsPTR.Q6KAU4	LPPsPTR	0.282707	0.226335	0.284339	Q6KAU4 1xPhospho [S307]	S307	-1.18246	Mvb12b
Q6KAU4	HIsLTLPATFR.Q6KAU4	HIsLTLPATFR	0.57594	0.00897977	0.0172485	Q6KAU4 1xPhospho [S222]	S222	-1.18246	Mvb12b
Q6NS60	ALGVGGAGcGVQGLAsLAR.Q6NS60	ALGVGGAGcGVQGLAsLAR	-0.427068	0.0617253	0.0918076	Q6NS60 1xPhospho [S760]	S760	0.748647	Fbxo41
Q6NS60	RHsTEGEEGDVSDVGSR.Q6NS60	RHsTEGEEGDVSDVGSR	0.714286	0.000584242	0.00162882	Q6NS60 1xPhospho [S476]	S476	0.748647	Fbxo41
Q6NS60	FRsLSSLR.Q6NS60	FRsLSSLR	0.642105	0.00285961	0.00644507	Q6NS60 1xPhospho [S21]	S21	0.748647	Fbxo41
Q6NS60	RVERGsPSR.Q6NS60	RVERGsPSR	0.395489	0.0853843	0.12273	Q6NS60 1xPhospho [S536]	S536	0.748647	Fbxo41
Q6NS60	SNEVIsPEILk.Q6NS60	SNEVIsPEILk	0.590977	0.00706009	0.0140783	Q6NS60 1xPhospho [S545]	S545	0.748647	Fbxo41
Q6NSW3	LTVNAPVkANsLDGFAQNcPQDSVNVQPVSR.Q6NSW3	LTVNAPVkANsLDGFAQNcPQDSVNVQPVSR	0.476692	0.0351387	0.0571398	Q6NSW3 1xPhospho [S1244]	S1244	-1.69172	Sphkap
Q6NSW3	ANsLDGFAQNcPQDSVNVQPVSR.Q6NSW3	ANsLDGFAQNcPQDSVNVQPVSR	0.547368	0.0138052	0.0250066	Q6NSW3 1xPhospho [S1244]	S1244	-1.69172	Sphkap
Q6NSW3	SNsLLESTDYWLQNQR.Q6NSW3	SNsLLESTDYWLQNQR	0.595489	0.00655513	0.013251	Q6NSW3 1xPhospho [S50]	S50	-1.69172	Sphkap
Q6NSW3	RSsHDWTTGLLSPSTR.Q6NSW3	RSsHDWTTGLLSPSTR	0.700752	0.00081682	0.00217418	Q6NSW3 1xPhospho [S1201]	S1201	-1.69172	Sphkap
Q6NVE8	EAENTANQAGNEsPVQELR.Q6NVE8	EAENTANQAGNEsPVQELR	0.0917293	0.700101	0.74811	Q6NVE8 1xPhospho [S50]	S50	0.373201	Wdr44
Q6NVE8	EYVSNDATQsDDEEkLQSQQTDTDGGR.Q6NVE8	EYVSNDATQsDDEEkLQSQQTDTDGGR	0.22406	0.34071	0.405509	Q6NVE8 1xPhospho [S405]	S405	0.373201	Wdr44
Q6NZJ6	EATLPPVsPPk.Q6NZJ6	EATLPPVsPPk	0.46015	0.0427264	0.0670235	Q6NZJ6 1xPhospho [S1231]	S1231	-0.724598	Eif4g1
Q6NZJ6	kAAsLTEDR.Q6NZJ6	kAAsLTEDR	0.0661654	0.781972	0.818133	Q6NZJ6 1xPhospho [S1211]	S1211	-0.724598	Eif4g1
Q6NZJ6	ITkPGsIDSNNQLFAPGGR.Q6NZJ6	ITkPGsIDSNNQLFAPGGR	0.699248	0.000846725	0.00225124	Q6NZJ6 1xPhospho [S1081]	S1081	-0.724598	Eif4g1
Q6NZJ6	AASLtEDRGRDPVkR.Q6NZJ6	AASLtEDRGRDPVkR	0.342857	0.139151	0.18742	Q6NZJ6 1xPhospho [T1213]	T1213	-0.724598	Eif4g1
Q6NZJ6	EAEDEEsDHN.Q6NZJ6	EAEDEEsDHN	-0.0390977	0.871187	0.889715	Q6NZJ6 1xPhospho [S1597]	S1597	-0.724598	Eif4g1
Q6NZJ6	SSLsRER.Q6NZJ6	SSLsRER	0.715789	0.000562121	0.00157649	Q6NZJ6 1xPhospho [S1149]	S1149	-0.724598	Eif4g1
Q6NZJ6	EATLPPVsPPkAALSVDEVEk.Q6NZJ6	EATLPPVsPPkAALSVDEVEk	0.514286	0.021836	0.0374763	Q6NZJ6 1xPhospho [S1231]	S1231	-0.724598	Eif4g1
Q6NZJ6	AAsLTEDR.Q6NZJ6	AAsLTEDR	0.392481	0.0879514	0.125958	Q6NZJ6 1xPhospho [S1211]	S1211	-0.724598	Eif4g1
Q6NZL0	EGPIGGEsDSEEVR.Q6NZL0	EGPIGGEsDSEEVR	0.568421	0.0100891	0.019114	Q6NZL0 1xPhospho [S779]	S779	-0.375049	Soga3
Q6NZL0	EQSEsLSELR.Q6NZL0	EQSEsLSELR	-0.166917	0.48018	0.542421	Q6NZL0 1xPhospho [S639]	S639	-0.375049	Soga3
Q6NZL0	AQsPARPR.Q6NZL0	AQsPARPR	0.804511	2.17922e-05	9.5845e-05	Q6NZL0 1xPhospho [S41]	S41	-0.375049	Soga3
Q6P4S6	QLsADSAEAHSLNmNR.Q6P4S6	QLsADSAEAHSLNmNR	0.586466	0.00759661	0.0149455	Q6P4S6 1xPhospho [S856]	S856	1.78836	Sik3
Q6P542	QLSVPAsDEEDEVPAPIPR.Q6P542	QLSVPAsDEEDEVPAPIPR	0.796992	3.33058e-05	0.00013773	Q6P542 1xPhospho [S107]	S107	-0.849671	Abcf1
Q6P542	LkQLSVPAsDEEDEVPAPIPR.Q6P542	LkQLSVPAsDEEDEVPAPIPR	0.604511	0.00563412	0.0116494	Q6P542 1xPhospho [S107]	S107	-0.849671	Abcf1
Q6P9K8	VkPTPQLLPPTDRPmsPR.Q6P9K8	VkPTPQLLPPTDRPmsPR	0.165414	0.484202	0.545917	Q6P9K8 1xPhospho [S821]	S821	0.831771	Caskin1
Q6P9K8	kVPLPGPGsPEVk.Q6P9K8	kVPLPGPGsPEVk	0.839098	0	0	Q6P9K8 1xPhospho [S1259]	S1259	0.831771	Caskin1
Q6P9K8	VPLPGPGsPEVkR.Q6P9K8	VPLPGPGsPEVkR	0.233083	0.321182	0.384601	Q6P9K8 1xPhospho [S1259]	S1259	0.831771	Caskin1
Q6P9K8	kVPLPGPGsPEVkR.Q6P9K8	kVPLPGPGsPEVkR	0.696241	0.000909209	0.00239571	Q6P9K8 1xPhospho [S1259]	S1259	0.831771	Caskin1
Q6P9K8	QVLPSGASHFtPPQTPTk.Q6P9K8	QVLPSGASHFtPPQTPTk	-0.0736842	0.757612	0.798683	Q6P9K8 1xPhospho [T779]	T779	0.831771	Caskin1
Q6P9K8	AHsLNR.Q6P9K8	AHsLNR	0.590977	0.00706009	0.0140783	Q6P9K8 1xPhospho [S884]	S884	0.831771	Caskin1
Q6P9K8	RGsGEPAEQSHFmEDGTAR.Q6P9K8	RGsGEPAEQSHFmEDGTAR	0.733835	0.000345147	0.00105471	Q6P9K8 1xPhospho [S1083]	S1083	0.831771	Caskin1
Q6P9K8	SLPQsPTHR.Q6P9K8	SLPQsPTHR	0.443609	0.0515469	0.0785047	Q6P9K8 1xPhospho [S828]	S828	0.831771	Caskin1
Q6P9K8	RPPEGHPTPRPAsPEPGR.Q6P9K8	RPPEGHPTPRPAsPEPGR	0.326316	0.160224	0.212878	Q6P9K8 1xPhospho [S1036]	S1036	0.831771	Caskin1
Q6P9K8	ESsLSGR.Q6P9K8	ESsLSGR	0.825564	3.01037e-06	2.15301e-05	Q6P9K8 1xPhospho [S699]	S699	0.831771	Caskin1
Q6P9K8	VPLPGPGsPEVk.Q6P9K8	VPLPGPGsPEVk	0.333835	0.150383	0.20128	Q6P9K8 1xPhospho [S1259]	S1259	0.831771	Caskin1
Q6P9K8	AQPGsPQALGGPHGPATAk.Q6P9K8	AQPGsPQALGGPHGPATAk	0.425564	0.0627223	0.0931728	Q6P9K8 1xPhospho [S791]	S791	0.831771	Caskin1
Q6P9K8	LLGsTk.Q6P9K8	LLGsTk	0.76391	0.000134123	0.000461392	Q6P9K8 1xPhospho [S36]	S36	0.831771	Caskin1
Q6P9K8	VEASAtLkR.Q6P9K8	VEASAtLkR	-0.407519	0.0756779	0.110328	Q6P9K8 1xPhospho [T1125]	T1125	0.831771	Caskin1
Q6P9K8	IQGsPTPASk.Q6P9K8	IQGsPTPASk	0.206015	0.381848	0.448347	Q6P9K8 1xPhospho [S1244]	S1244	0.831771	Caskin1
Q6PAJ1	ASAPRPPPAPADGADPAPVEESEARPDGEGsPSkGR.Q6PAJ1	ASAPRPPPAPADGADPAPVEESEARPDGEGsPSkGR	-0.258647	0.269667	0.331	Q6PAJ1 1xPhospho [S122]	S122	0.0966121	Bcr
Q6PAJ1	VSPsPTTYR.Q6PAJ1	VSPsPTTYR	0.0285714	0.906366	0.919654	Q6PAJ1 1xPhospho [S358]	S358	0.0966121	Bcr
Q6PAJ1	SQsTSEQEk.Q6PAJ1	SQsTSEQEk	0.126316	0.594489	0.651528	Q6PAJ1 1xPhospho [S303]	S303	0.0966121	Bcr
Q6PAR5	SRsSDIVSSVR.Q6PAR5	SRsSDIVSSVR	0.598496	0.0062353	0.0126918	Q6PAR5 1xPhospho [S902]	S902	-0.66349	Gapvd1
Q6PAR5	kDsDDERSDR.Q6PAR5	kDsDDERSDR	0.560902	0.0113081	0.0211343	Q6PAR5 1xPhospho [S964]	S964	-0.66349	Gapvd1
Q6PAR5	AVEtPPmSSVNLLEGLSR.Q6PAR5	AVEtPPmSSVNLLEGLSR	0.087218	0.714342	0.762289	Q6PAR5 1xPhospho [T390]	T390	-0.66349	Gapvd1
Q6PAR5	GETEERkDsDDERSDR.Q6PAR5	GETEERkDsDDERSDR	0.655639	0.00219322	0.00510955	Q6PAR5 1xPhospho [S964]	S964	-0.66349	Gapvd1
Q6PB44	REEGEAVEAGDtPEELR.Q6PB44	REEGEAVEAGDtPEELR	-0.0646617	0.786869	0.822159	Q6PB44 1xPhospho [T744]	T744	0.439429	Ptpn23
Q6PCN3	APPDsPTTPVR.Q6PCN3	APPDsPTTPVR	0.081203	0.733476	0.778119	Q6PCN3 1xPhospho [S441]	S441	-0.097547	Ttbk1
Q6PCN3	RVNsPESER.Q6PCN3	RVNsPESER	0.311278	0.181256	0.236416	Q6PCN3 1xPhospho [S456]	S456	-0.097547	Ttbk1
Q6PCN3	mDLPGsPSR.Q6PCN3	mDLPGsPSR	0.324812	0.162246	0.215443	Q6PCN3 1xPhospho [S484]	S484	-0.097547	Ttbk1
Q6PCN3	TLVLVsPGDmk.Q6PCN3	TLVLVsPGDmk	0.338346	0.144689	0.194433	Q6PCN3 1xPhospho [S834]	S834	-0.097547	Ttbk1
Q6PCN3	GVGVPSsPVRAPPDsPTTPVR.Q6PCN3	GVGVPSsPVRAPPDsPTTPVR	0.457143	0.0442348	0.0688845	Q6PCN3 2xPhospho [S433; S441]	S433	-0.097547	Ttbk1
Q6PCN3	kGTTIsPSR.Q6PCN3	kGTTIsPSR	0.574436	0.00919321	0.0176297	Q6PCN3 1xPhospho [S1034]	S1034	-0.097547	Ttbk1
Q6PCP5	ERsmSENAVR.Q6PCP5	ERsmSENAVR	0.135338	0.568108	0.626116	Q6PCP5 1xPhospho [S129]	S129	0.0163581	Mff
Q6PD03	SQGsSQFR.Q6PD03	SQGsSQFR	0.111278	0.63958	0.691923	Q6PD03 1xPhospho [S41]	S41	2.12782	Ppp2r5a
Q6PD10	ASLsFETSESSQEAk.Q6PD10	ASLsFETSESSQEAk	0.317293	0.172625	0.226414	Q6PD10 1xPhospho [S139]	S139	-0.464898	Ip6k1
Q6PDH0	SsPPPLPAk.Q6PDH0	SsPPPLPAk	0.360902	0.118522	0.162803	Q6PDH0 1xPhospho [S951]	S951	-1.76615	Phldb1
Q6PDH0	kLsSGDLR.Q6PDH0	kLsSGDLR	0.673684	0.00150847	0.00365544	Q6PDH0 1xPhospho [S565]	S565	-1.76615	Phldb1
Q6PDL0	EFQDYIEPEEGcQGsPQR.Q6PDL0	EFQDYIEPEEGcQGsPQR	0.0165414	0.946778	0.956124	Q6PDL0 1xPhospho [S194]	S194	-0.0132663	Dync1li2
Q6PDQ2	mSQPGsPSPk.Q6PDQ2	mSQPGsPSPk	0.476692	0.0351387	0.0571398	Q6PDQ2 1xPhospho [S1528]	S1528	-0.520686	Chd4
Q6PDS3	EmLHsPLPcTGGk.Q6PDS3	EmLHsPLPcTGGk	0.675188	0.00146046	0.00355741	Q6PDS3 1xPhospho [S548]	S548	-1.23902	Sarm1
Q6PER3	TsPTGPk.Q6PER3	TsPTGPk	0.568421	0.0100891	0.019114	Q6PER3 1xPhospho [S162]	S162	2.18028	Mapre3
Q6PFD5	SSsVDTAR.Q6PFD5	SSsVDTAR	0.792481	4.18073e-05	0.000169901	Q6PFD5 1xPhospho [S429]	S429	2.45969	Dlgap3
Q6PFD5	AGLGHLsPEGPLSLSEGPSSVGPEGGPGGVGAGGGSSTFPR.Q6PFD5	AGLGHLsPEGPLSLSEGPSSVGPEGGPGGVGAGGGSSTFPR	-0.081203	0.733476	0.778119	Q6PFD5 1xPhospho [S58]	S58	2.45969	Dlgap3
Q6PFD5	SEsPSRIR.Q6PFD5	SEsPSRIR	0.786466	5.52894e-05	0.000215391	Q6PFD5 1xPhospho [S165]	S165	2.45969	Dlgap3
Q6PFD5	RDsWmER.Q6PFD5	RDsWmER	0.219549	0.350735	0.416388	Q6PFD5 1xPhospho [S771]	S771	2.45969	Dlgap3
Q6PFD5	SHsLEAPGkR.Q6PFD5	SHsLEAPGkR	0.834586	0	0	Q6PFD5 1xPhospho [S185]	S185	2.45969	Dlgap3
Q6PFD5	ERsLDSVDR.Q6PFD5	ERsLDSVDR	0.803008	2.38516e-05	0.000103167	Q6PFD5 1xPhospho [S930]	S930	2.45969	Dlgap3
Q6PFD5	RSSsVDTAR.Q6PFD5	RSSsVDTAR	0.679699	0.00132389	0.00329641	Q6PFD5 1xPhospho [S429]	S429	2.45969	Dlgap3
Q6PFD5	sLPDSGR.Q6PFD5	sLPDSGR	0.839098	0	0	Q6PFD5 1xPhospho [S779]	S779	2.45969	Dlgap3
Q6PFD5	HAsEPQPGPR.Q6PFD5	HAsEPQPGPR	-0.371429	0.107575	0.149955	Q6PFD5 1xPhospho [S712]	S712	2.45969	Dlgap3
Q6PFD5	HSSATESADsIEIYIPEAQTR.Q6PFD5	HSSATESADsIEIYIPEAQTR	-0.431579	0.0588075	0.0878565	Q6PFD5 1xPhospho [S965]	S965	2.45969	Dlgap3
Q6PGN3	YSGSRsPGFSR.Q6PGN3	YSGSRsPGFSR	0.783459	6.30519e-05	0.000241238	Q6PGN3 1xPhospho [S307]	S307	-0.976151	Dclk2
Q6PGN3	sIELEHFEER.Q6PGN3	sIELEHFEER	0.559398	0.0115658	0.0214964	Q6PGN3 1xPhospho [S6]	S6	-0.976151	Dclk2
Q6PH08	IAsLER.Q6PH08	IAsLER	0.796992	3.33058e-05	0.00013773	Q6PH08 1xPhospho [S389]	S389	1.14243	Erc2
Q6PH08	RTSsGGGGGTGk.Q6PH08	RTSsGGGGGTGk	0.857143	0	0	Q6PH08 1xPhospho [S34]	S34	1.14243	Erc2
Q6PIC6	kDDkSsPk.Q6PIC6	kDDkSsPk	0.685714	0.00115823	0.00294949	Q6PIC6 1xPhospho [S10]	S10	2.41818	Atp1a3
Q6PNC0	ILsPFSQk.Q6PNC0	ILsPFSQk	0.215038	0.360934	0.427632	Q6PNC0 1xPhospho [S922]	S922	1.01657	Dmxl1
Q6RHR9	kDsQNSSQHSVSSHR.Q6RHR9	kDsQNSSQHSVSSHR	0.589474	0.00723535	0.0143912	Q6RHR9 1xPhospho [S733]	S733	0.309605	Magi1
Q6VNB8	LLEEGAVSVDSVsPTLR.Q6VNB8	LLEEGAVSVDSVsPTLR	-0.111278	0.63958	0.691923	Q6VNB8 1xPhospho [S759]	S759	0.54085	Wdfy3
Q6VNB8	LkISsPVR.Q6VNB8	LkISsPVR	0.607519	0.00535194	0.0111542	Q6VNB8 1xPhospho [S3483]	S3483	0.54085	Wdfy3
Q6Y685	SHPPANFFGSGPILQNsPPLSSk.Q6Y685	SHPPANFFGSGPILQNsPPLSSk	0.0075188	0.977178	0.981767	Q6Y685 1xPhospho [S401]	S401	2.27323	Tacc1
Q6Y7W8	SQsWEERGDR.Q6Y7W8	SQsWEERGDR	0.285714	0.221267	0.279614	Q6Y7W8 1xPhospho [S161]	S161	-0.65225	Gigyf2
Q6ZPE2	LGLGTLSSsLSR.Q6ZPE2	LGLGTLSSsLSR	0.17594	0.456409	0.519811	Q6ZPE2 1xPhospho [S1141]	S1141	1.31285	Sbf1
Q6ZPF3	QGsPTkDIEIQFQR.Q6ZPF3	QGsPTkDIEIQFQR	-0.0842105	0.723889	0.770032	Q6ZPF3 1xPhospho [S1604]	S1604	1.20158	Tiam2
Q6ZPF3	HLsDADRLR.Q6ZPF3	HLsDADRLR	0.932331	5.04436e-06	3.05125e-05	Q6ZPF3 1xPhospho [S1116]	S1116	1.20158	Tiam2
Q6ZPF3	HLsDADR.Q6ZPF3	HLsDADR	0.827068	2.24499e-06	1.72067e-05	Q6ZPF3 1xPhospho [S1116]	S1116	1.20158	Tiam2
Q6ZPF3	ESDILsDEDEDFHHPLk.Q6ZPF3	ESDILsDEDEDFHHPLk	0.368421	0.110623	0.153386	Q6ZPF3 1xPhospho [S1590]	S1590	1.20158	Tiam2
Q6ZPJ0	SLsTDTSRQESDTVSYkPPDSk.Q6ZPJ0	SLsTDTSRQESDTVSYkPPDSk	0.809023	1.62733e-05	7.46413e-05	Q6ZPJ0 1xPhospho [S221]	S221	0.770073	Tex2
Q6ZPJ3	EEkPEVQsPVk.Q6ZPJ3	EEkPEVQsPVk	0.309774	0.18346	0.238366	Q6ZPJ3 1xPhospho [S893]	S893	-0.320495	Ube2o
Q6ZPQ6	HLSRsNIDIPR.Q6ZPQ6	HLSRsNIDIPR	-0.293233	0.208932	0.266027	Q6ZPQ6 1xPhospho [S630]	S630	0.499114	Pitpnm2
Q6ZQ08	TAsPQQR.Q6ZQ08	TAsPQQR	-0.437594	0.0550843	0.0832991	Q6ZQ08 1xPhospho [S1480]	S1480	-0.4177	Cnot1
Q6ZQ18	NsPEkEER.Q6ZQ18	NsPEkEER	0.714286	0.000584242	0.00162882	Q6ZQ18 1xPhospho [S709]	S709	1.93666	Efr3b
Q6ZQ29	TAsLVSR.Q6ZQ29	TAsLVSR	0.181955	0.440913	0.505343	Q6ZQ29 1xPhospho [S480]	S480	-0.560032	Taok2
Q6ZQ58	ESPRPPAAAEAPAGsDGEDGGRRDFVEAPPPk.Q6ZQ58	ESPRPPAAAEAPAGsDGEDGGRRDFVEAPPPk	0.354887	0.125132	0.170786	Q6ZQ58 1xPhospho [S81]	S81	-0.368521	Larp1
Q6ZQ58	ESPRPPAAAEAPAGsDGEDGGRR.Q6ZQ58	ESPRPPAAAEAPAGsDGEDGGRR	0.676692	0.00141371	0.00347592	Q6ZQ58 1xPhospho [S81]	S81	-0.368521	Larp1
Q6ZWR6	TLPsEDEEGEEDkEFYLR.Q6ZWR6	TLPsEDEEGEEDkEFYLR	0.0556391	0.816412	0.845146	Q6ZWR6 1xPhospho [S8308]	S8308	0.803794	Syne1
Q76LS9	APsPQGR.Q76LS9	APsPQGR	0.53985	0.0153757	0.0274917	Q76LS9 1xPhospho [S440]	S440	-0.635786	Mindy1
Q76LS9	TRAPsPQGR.Q76LS9	TRAPsPQGR	0.291729	0.211361	0.268974	Q76LS9 1xPhospho [S440]	S440	-0.635786	Mindy1
Q76LS9	SHGAEGGGGsPEk.Q76LS9	SHGAEGGGGsPEk	-0.0947368	0.690662	0.740377	Q76LS9 1xPhospho [S382]	S382	-0.635786	Mindy1
Q76LS9	VETAEVcSRPQELPQsPR.Q76LS9	VETAEVcSRPQELPQsPR	-0.261654	0.263978	0.325204	Q76LS9 1xPhospho [S103]	S103	-0.635786	Mindy1
Q7TME0	NASIHAsmDSAR.Q7TME0	NASIHAsmDSAR	0.115789	0.625911	0.680577	Q7TME0 1xPhospho [S439]	S439	-0.0473472	Plppr4
Q7TME0	DALRsLTDLNQDPSR.Q7TME0	DALRsLTDLNQDPSR	0.663158	0.00188218	0.00448257	Q7TME0 1xPhospho [S347]	S347	-0.0473472	Plppr4
Q7TME0	DASsLTNLkR.Q7TME0	DASsLTNLkR	0.481203	0.0332671	0.0542839	Q7TME0 1xPhospho [S386]	S386	-0.0473472	Plppr4
Q7TME0	ANADVEIITPRsPmGk.Q7TME0	ANADVEIITPRsPmGk	0.604511	0.00563412	0.0116494	Q7TME0 1xPhospho [S404]	S404	-0.0473472	Plppr4
Q7TME0	SNsPENTR.Q7TME0	SNsPENTR	0.581955	0.0081662	0.0159726	Q7TME0 1xPhospho [S746]	S746	-0.0473472	Plppr4
Q7TME0	TVHTsPGGGLGAR.Q7TME0	TVHTsPGGGLGAR	0.0135338	0.956905	0.963457	Q7TME0 1xPhospho [S37]	S37	-0.0473472	Plppr4
Q7TMY8	GSGTAsDDEFENLR.Q7TMY8	GSGTAsDDEFENLR	-0.0601504	0.801607	0.834224	Q7TMY8 1xPhospho [S1907]	S1907	-0.185476	Huwe1
Q7TMY8	AEsPEEVAcRkEEEER.Q7TMY8	AEsPEEVAcRkEEEER	0.0932331	0.695376	0.744413	Q7TMY8 1xPhospho [S1395]	S1395	-0.185476	Huwe1
Q7TMY8	AEsPEEVAcR.Q7TMY8	AEsPEEVAcR	0.284211	0.223792	0.282047	Q7TMY8 1xPhospho [S1395]	S1395	-0.185476	Huwe1
Q7TMY8	AQcETLsPDGLPEEQPQTTk.Q7TMY8	AQcETLsPDGLPEEQPQTTk	0.843609	0	0	Q7TMY8 1xPhospho [S3663]	S3663	-0.185476	Huwe1
Q7TMY8	LGSSGLGsASSIQAAVR.Q7TMY8	LGSSGLGsASSIQAAVR	0.169925	0.472187	0.535965	Q7TMY8 1xPhospho [S3758]	S3758	-0.185476	Huwe1
Q7TMY8	RAQcETLsPDGLPEEQPQTTk.Q7TMY8	RAQcETLsPDGLPEEQPQTTk	0.0526316	0.826316	0.853147	Q7TMY8 1xPhospho [S3663]	S3663	-0.185476	Huwe1
Q7TN29	kAVGSmPTAGSAGsVPENLNLFPEPGSk.Q7TN29	kAVGSmPTAGSAGsVPENLNLFPEPGSk	-0.0345865	0.886238	0.903909	Q7TN29 1xPhospho [S239]	S239	0.461988	Smap2
Q7TNF0	QVPLPsPSSmSAALR.Q7TNF0	QVPLPsPSSmSAALR	-0.121805	0.607873	0.663108	Q7TNF0 1xPhospho [S226]	S226	0.618173	Doc2a
Q7TNM2	LQESFQGAPDVIsPR.Q7TNM2	LQESFQGAPDVIsPR	0.592481	0.00688833	0.0138532	Q7TNM2 1xPhospho [S627]	S627	-0.357175	Trim46
Q7TPB0	SVsTDELGPPGRLEGVPRPVAR.Q7TPB0	SVsTDELGPPGRLEGVPRPVAR	0.891729	9.31678e-08	9.28915e-07	Q7TPB0 1xPhospho [S320]	S320	-3.21695	Plppr3
Q7TPB0	VILPPRPGPQPLVHIPEEGVQAGAGLsPk.Q7TPB0	VILPPRPGPQPLVHIPEEGVQAGAGLsPk	0.956391	6.36631e-06	3.38235e-05	Q7TPB0 1xPhospho [S505]	S505	-3.21695	Plppr3
Q7TPB0	RAsVDVDLLAPRsPmGk.Q7TPB0	RAsVDVDLLAPRsPmGk	0.869173	0	0	Q7TPB0 2xPhospho [S351; S361]	S351	-3.21695	Plppr3
Q7TPB0	TSLGsLkR.Q7TPB0	TSLGsLkR	0.942857	5.785e-06	3.24871e-05	Q7TPB0 1xPhospho [S346]	S346	-3.21695	Plppr3
Q7TPB0	SSckQPGmGPGsPVSDVDQEEPR.Q7TPB0	SSckQPGmGPGsPVSDVDQEEPR	0.899248	1.18028e-06	1.0286e-05	Q7TPB0 1xPhospho [S641]	S641	-3.21695	Plppr3
Q7TPB0	ASVDVDLLAPRsPmGk.Q7TPB0	ASVDVDLLAPRsPmGk	0.938346	5.4992e-06	3.19496e-05	Q7TPB0 1xPhospho [S361]	S361	-3.21695	Plppr3
Q7TPB0	RAsVDVDLLAPR.Q7TPB0	RAsVDVDLLAPR	0.87218	0	0	Q7TPB0 1xPhospho [S351]	S351	-3.21695	Plppr3
Q7TPB0	QPGmGPGsPVSDVDQEEPR.Q7TPB0	QPGmGPGsPVSDVDQEEPR	0.705263	0.000732211	0.0019849	Q7TPB0 1xPhospho [S641]	S641	-3.21695	Plppr3
Q7TPB0	GLGLPDEAsPVHLR.Q7TPB0	GLGLPDEAsPVHLR	0.765414	0.000127184	0.000444012	Q7TPB0 1xPhospho [S426]	S426	-3.21695	Plppr3
Q7TPB0	QksLEGR.Q7TPB0	QksLEGR	0.819549	6.73162e-06	3.38451e-05	Q7TPB0 1xPhospho [S413]	S413	-3.21695	Plppr3
Q7TPB0	EkTsLGSLk.Q7TPB0	EkTsLGSLk	0.365414	0.113735	0.156961	Q7TPB0 1xPhospho [S343]	S343	-3.21695	Plppr3
Q7TPH6	IPGsPSAAASSADmTFGGLASPk.Q7TPH6	IPGsPSAAASSADmTFGGLASPk	0.499248	0.0265576	0.0442877	Q7TPH6 1xPhospho [S2331]	S2331	-1.16444	Mycbp2
Q7TPH6	SSPSGASsPR.Q7TPH6	SSPSGASsPR	0.912782	3.00375e-06	2.15301e-05	Q7TPH6 1xPhospho [S2911]	S2911	-1.16444	Mycbp2
Q7TPH6	DPkDsPGSENR.Q7TPH6	DPkDsPGSENR	0.396992	0.0841221	0.121212	Q7TPH6 1xPhospho [S2983]	S2983	-1.16444	Mycbp2
Q7TPM6	RGsATSSSNTSLT.Q7TPM6	RGsATSSSNTSLT	-0.270677	0.247379	0.306521	Q7TPM6 1xPhospho [S486]	S486	-0.248821	Fsd1
Q7TQ95	SPVLRADsVPNLEPSEESLVTk.Q7TQ95	SPVLRADsVPNLEPSEESLVTk	0.401504	0.0804202	0.116592	Q7TQ95 1xPhospho [S411]	S411	0.284653	Lnpk
Q7TQ95	ADsVPNLEPSEESLVTk.Q7TQ95	ADsVPNLEPSEESLVTk	0.24812	0.290194	0.352518	Q7TQ95 1xPhospho [S411]	S411	0.284653	Lnpk
Q7TQD2	RLsLESEGANEGATAAPELSALEEAFRR.Q7TQD2	RLsLESEGANEGATAAPELSALEEAFRR	0.724812	0.0004431	0.00128877	Q7TQD2 1xPhospho [S31]	S31	4.43148	Tppp
Q7TQD2	TPPksPGDPAR.Q7TQD2	TPPksPGDPAR	0.945865	5.94947e-06	3.30168e-05	Q7TQD2 1xPhospho [S19]	S19	4.43148	Tppp
Q7TQF7	AALPAGEGGsPEGAk.Q7TQF7	AALPAGEGGsPEGAk	0.873684	0	0	Q7TQF7 1xPhospho [S500]	S500	1.77583	Amph
Q7TQH0	LSLtPTDVk.Q7TQH0	LSLtPTDVk	0.378947	0.100227	0.140797	Q7TQH0 1xPhospho [T505]	T505	-0.929018	Atxn2l
Q7TQH0	GQTTGkGPPQsPVFEGVYNNSR.Q7TQH0	GQTTGkGPPQsPVFEGVYNNSR	0.550376	0.0132148	0.0240855	Q7TQH0 1xPhospho [S109]	S109	-0.929018	Atxn2l
Q7TQH0	LSLtPTDVkELPTkEPSR.Q7TQH0	LSLtPTDVkELPTkEPSR	0.730827	0.000375653	0.00112314	Q7TQH0 1xPhospho [T505]	T505	-0.929018	Atxn2l
Q7TQH0	EkEVDGLLTSDPmGsPVSSk.Q7TQH0	EkEVDGLLTSDPmGsPVSSk	0.317293	0.172625	0.226414	Q7TQH0 1xPhospho [S597]	S597	-0.929018	Atxn2l
Q7TQH0	GPPQsPVFEGVYNNSR.Q7TQH0	GPPQsPVFEGVYNNSR	-0.21203	0.367829	0.434707	Q7TQH0 1xPhospho [S109]	S109	-0.929018	Atxn2l
Q7TSC1	LISGPLsPmSR.Q7TSC1	LISGPLsPmSR	0.0120301	0.961971	0.968143	Q7TSC1 1xPhospho [S1217]	S1217	0.231802	Prrc2a
Q7TSC1	EGPEPPEEVPPPTtPPAPk.Q7TSC1	EGPEPPEEVPPPTtPPAPk	-0.284211	0.223792	0.282047	Q7TSC1 1xPhospho [T609]	T609	0.231802	Prrc2a
Q7TSJ2	ATGPAPGPsVDRETVAAPGR.Q7TSJ2	ATGPAPGPsVDRETVAAPGR	0.169925	0.472187	0.535965	Q7TSJ2 1xPhospho [S86]	S86	2.1202	Map6
Q7TSJ2	GQsPTAPGPTk.Q7TSJ2	GQsPTAPGPTk	0.891729	9.31678e-08	9.28915e-07	Q7TSJ2 1xPhospho [S632]	S632	2.1202	Map6
Q7TSJ2	AQsPLLPEPLk.Q7TSJ2	AQsPLLPEPLk	0.757895	0.000164795	0.000552367	Q7TSJ2 1xPhospho [S687]	S687	2.1202	Map6
Q80T41	TckDPIEDINsPEHIQR.Q80T41	TckDPIEDINsPEHIQR	0.908271	2.42476e-06	1.84047e-05	Q80T41 1xPhospho [S883]	S883	0.969652	Gabbr2
Q80TE7	GVIAISksTER.Q80TE7	GVIAISksTER	0.44812	0.0490119	0.0752283	Q80TE7 1xPhospho [S928]	S928	1.88723	Lrrc7
Q80TE7	GQRsmDGYPEQFcVR.Q80TE7	GQRsmDGYPEQFcVR	0.494737	0.0281232	0.0465685	Q80TE7 1xPhospho [S1392]	S1392	1.88723	Lrrc7
Q80TE7	TPsPFEDR.Q80TE7	TPsPFEDR	0.584962	0.00778272	0.0152734	Q80TE7 1xPhospho [S850]	S850	1.88723	Lrrc7
Q80TE7	NIAkDLVsPR.Q80TE7	NIAkDLVsPR	0.288722	0.216276	0.274486	Q80TE7 1xPhospho [S1072]	S1072	1.88723	Lrrc7
Q80TE7	SQsIDEIDVGTYk.Q80TE7	SQsIDEIDVGTYk	0.640602	0.00294296	0.00662024	Q80TE7 1xPhospho [S949]	S949	1.88723	Lrrc7
Q80TF3	SksPEHVR.Q80TF3	SksPEHVR	0.819549	6.73162e-06	3.38451e-05	Q80TF3 1xPhospho [S983]	S983	-1.38973	Pcdh19
Q80TJ1	AGGGRPSsPSPSVVSEkEkEELER.Q80TJ1	AGGGRPSsPSPSVVSEkEkEELER	0.458647	0.0434755	0.0678817	Q80TJ1 1xPhospho [S89]	S89	1.7505	Cadps
Q80TK0	ISSVksLDScPSQGLPQEGQVk.Q80TK0	ISSVksLDScPSQGLPQEGQVk	0.482707	0.0326611	0.0533692	Q80TK0 1xPhospho [S1051]	S1051	0.6295	Kiaa1107
Q80TK0	QRPHESPcTLAcDTSGPEVSQIPcRPQPQsPLGSQEk.Q80TK0	QRPHESPcTLAcDTSGPEVSQIPcRPQPQsPLGSQEk	0.654135	0.00226023	0.00526046	Q80TK0 1xPhospho [S481]	S481	0.6295	Kiaa1107
Q80TL0	VDsFTDR.Q80TL0	VDsFTDR	0.747368	0.000231131	0.000748075	Q80TL0 1xPhospho [S545]	S545	1.14785	Ppm1e
Q80TL4	RGtVEGSVQEVQEEkEAEASAPVVQEESSINR.Q80TL4	RGtVEGSVQEVQEEkEAEASAPVVQEESSINR	0.0781955	0.743102	0.786558	Q80TL4 1xPhospho [T47]	T47	1.52904	Phf24
Q80TM6	ASSFsGIsILTRGDSIGSSk.Q80TM6	ASSFsGIsILTRGDSIGSSk	0.457143	0.0442348	0.0688845	Q80TM6 2xPhospho [S383; S386]	S383	-0.0469929	R3hdm2
Q80TM6	RDDAsmDRDDNQmR.Q80TM6	RDDAsmDRDDNQmR	0.700752	0.00081682	0.00217418	Q80TM6 1xPhospho [S263]	S263	-0.0469929	R3hdm2
Q80TM6	GDsIGSSk.Q80TM6	GDsIGSSk	0.759398	0.000156672	0.000529667	Q80TM6 1xPhospho [S393]	S393	-0.0469929	R3hdm2
Q80TM6	ASsFSGISILTR.Q80TM6	ASsFSGISILTR	0.818045	7.84202e-06	3.89288e-05	Q80TM6 1xPhospho [S381]	S381	-0.0469929	R3hdm2
Q80TN7	HSATSTmLTVkQPsPATSPTPSSDR.Q80TN7	HSATSTmLTVkQPsPATSPTPSSDR	0.186466	0.42948	0.493923	Q80TN7 1xPhospho [S354]	S354	-0.825894	Nav3
Q80TN7	SPsDAGk.Q80TN7	SPsDAGk	0.580451	0.00836368	0.0162777	Q80TN7 1xPhospho [S1042]	S1042	-0.825894	Nav3
Q80TN7	YPDIAsPTFR.Q80TN7	YPDIAsPTFR	0.634586	0.00329667	0.00729733	Q80TN7 1xPhospho [S1248]	S1248	-0.825894	Nav3
Q80TN7	SQsFNSIDk.Q80TN7	SQsFNSIDk	0.366917	0.112171	0.155258	Q80TN7 1xPhospho [S275]	S275	-0.825894	Nav3
Q80TN7	sLPRPSk.Q80TN7	sLPRPSk	0.693233	0.000975399	0.00254447	Q80TN7 1xPhospho [S1140]	S1140	-0.825894	Nav3
Q80TN7	AVsHSGSFR.Q80TN7	AVsHSGSFR	0.724812	0.0004431	0.00128877	Q80TN7 1xPhospho [S1535]	S1535	-0.825894	Nav3
Q80TN7	IGSGRSsPVTVNQTDkEk.Q80TN7	IGSGRSsPVTVNQTDkEk	0.771429	0.000102087	0.000367856	Q80TN7 1xPhospho [S1193]	S1193	-0.825894	Nav3
Q80TQ2	VTsPYWEER.Q80TQ2	VTsPYWEER	-0.075188	0.752766	0.795713	Q80TQ2 1xPhospho [S13]	S13	1.6485	Cyld
Q80TR1	SPPGGTHGsLk.Q80TR1	SPPGGTHGsLk	0.142857	0.546535	0.606602	Q80TR1 1xPhospho [S1123]	S1123	0.775725	Adgrl1
Q80TS3	TPGRYsTGSQSR.Q80TS3	TPGRYsTGSQSR	-0.287218	0.218762	0.277342	Q80TS3 1xPhospho [S1235]	S1235	0.956546	Adgrl3
Q80TS3	YSTGSQsR.Q80TS3	YSTGSQsR	0.505263	0.0245795	0.0415784	Q80TS3 1xPhospho [S1240]	S1240	0.956546	Adgrl3
Q80TS3	GPAHLVTsL.Q80TS3	GPAHLVTsL	0.356391	0.123455	0.168791	Q80TS3 1xPhospho [S1536]	S1536	0.956546	Adgrl3
Q80TV8	DGGAAsPATEGR.Q80TV8	DGGAAsPATEGR	0.777444	8.08652e-05	0.000302987	Q80TV8 1xPhospho [S1220]	S1220	-0.634765	Clasp1
Q80TV8	NSSNTGVGsPSNTIGR.Q80TV8	NSSNTGVGsPSNTIGR	0.702256	0.00078778	0.00211603	Q80TV8 1xPhospho [S1088]	S1088	-0.634765	Clasp1
Q80TV8	SRsANPAGAGSR.Q80TV8	SRsANPAGAGSR	0.590977	0.00706009	0.0140783	Q80TV8 1xPhospho [S676]	S676	-0.634765	Clasp1
Q80TV8	RsPTGSTASR.Q80TV8	RsPTGSTASR	0.0315789	0.896294	0.912583	Q80TV8 1xPhospho [S572]	S572	-0.634765	Clasp1
Q80TV8	SANPAGAGsR.Q80TV8	SANPAGAGsR	0.651128	0.00239933	0.00554036	Q80TV8 1xPhospho [S684]	S684	-0.634765	Clasp1
Q80TV8	FSFRsQEDLNEPIkR.Q80TV8	FSFRsQEDLNEPIkR	0.744361	0.000253438	0.000806955	Q80TV8 1xPhospho [S1193]	S1193	-0.634765	Clasp1
Q80TV8	sPTGSTASR.Q80TV8	sPTGSTASR	0.721805	0.000480272	0.00137647	Q80TV8 1xPhospho [S572]	S572	-0.634765	Clasp1
Q80TV8	ETsPNR.Q80TV8	ETsPNR	0.0511278	0.831278	0.857894	Q80TV8 1xPhospho [S728]	S728	-0.634765	Clasp1
Q80TZ3	TATSASAsPTLR.Q80TZ3	TATSASAsPTLR	0.929323	4.78536e-06	2.94763e-05	Q80TZ3 1xPhospho [S595]	S595	1.78046	Dnajc6
Q80U22	SRsYDR.Q80U22	SRsYDR	0.747368	0.000231131	0.000748075	Q80U22 1xPhospho [S496]	S496	0.0536716	Rusc2
Q80U22	LSEGPAALAGPAsPPR.Q80U22	LSEGPAALAGPAsPPR	-0.0466165	0.846202	0.869102	Q80U22 1xPhospho [S534]	S534	0.0536716	Rusc2
Q80U22	ISSDEsPRHPGR.Q80U22	ISSDEsPRHPGR	0.374436	0.10459	0.14614	Q80U22 1xPhospho [S234]	S234	0.0536716	Rusc2
Q80U22	SLERsPPVR.Q80U22	SLERsPPVR	0.258647	0.269667	0.331	Q80U22 1xPhospho [S504]	S504	0.0536716	Rusc2
Q80U22	ASVGDSSQEFsPIQEAQQDR.Q80U22	ASVGDSSQEFsPIQEAQQDR	0.409023	0.0745263	0.108919	Q80U22 1xPhospho [S572]	S572	0.0536716	Rusc2
Q80U22	LSEGPAALAGPAsPPRR.Q80U22	LSEGPAALAGPAsPPRR	-0.0631579	0.791774	0.82655	Q80U22 1xPhospho [S534]	S534	0.0536716	Rusc2
Q80U23	SStYTk.Q80U23	SStYTk	0.867669	0	0	Q80U23 1xPhospho [T214]	T214	3.04084	Snph
Q80U23	FPASNtYEk.Q80U23	FPASNtYEk	0.744361	0.000253438	0.000806955	Q80U23 1xPhospho [T292]	T292	3.04084	Snph
Q80U23	GSDSsPTPR.Q80U23	GSDSsPTPR	0.753383	0.000191114	0.000630704	Q80U23 1xPhospho [S49]	S49	3.04084	Snph
Q80U28	EkPAGsPIR.Q80U28	EkPAGsPIR	0.736842	0.000316639	0.000981622	Q80U28 1xPhospho [S1266]	S1266	1.38473	Madd
Q80U28	kRsPTENVNTPVGkDPGLAGR.Q80U28	kRsPTENVNTPVGkDPGLAGR	0.92782	4.64804e-06	2.94763e-05	Q80U28 1xPhospho [S1058]	S1058	1.38473	Madd
Q80U28	sPTENVNTPVGk.Q80U28	sPTENVNTPVGk	0.544361	0.0144169	0.0259747	Q80U28 1xPhospho [S1058]	S1058	1.38473	Madd
Q80U28	EPSsPQGR.Q80U28	EPSsPQGR	0.921805	4.04776e-06	2.66044e-05	Q80U28 1xPhospho [S929]	S929	1.38473	Madd
Q80U28	ATLsDSEIETNSATSAIFGk.Q80U28	ATLsDSEIETNSATSAIFGk	0.816541	9.03085e-06	4.45484e-05	Q80U28 1xPhospho [S1237]	S1237	1.38473	Madd
Q80U28	kRsPTENVNTPVGk.Q80U28	kRsPTENVNTPVGk	0.807519	1.80072e-05	8.10153e-05	Q80U28 1xPhospho [S1058]	S1058	1.38473	Madd
Q80U28	SSVIkHsPTVk.Q80U28	SSVIkHsPTVk	0.732331	0.000360143	0.00108504	Q80U28 1xPhospho [S920]	S920	1.38473	Madd
Q80U28	LLRPNsLk.Q80U28	LLRPNsLk	0.810526	1.46396e-05	6.80768e-05	Q80U28 1xPhospho [S812]	S812	1.38473	Madd
Q80U40	DHLsPDFYDESETDPGAEELPAR.Q80U40	DHLsPDFYDESETDPGAEELPAR	-0.475188	0.0357808	0.0579039	Q80U40 1xPhospho [S852]	S852	3.358	Rimbp2
Q80U49	LGDAsDTEAVDGERGTAANPEPANR.Q80U49	LGDAsDTEAVDGERGTAANPEPANR	-0.374436	0.10459	0.14614	Q80U49 1xPhospho [S1122]	S1122	0.472348	Cep170b
Q80U49	TAsVSGASAEASGEQVR.Q80U49	TAsVSGASAEASGEQVR	-0.237594	0.311681	0.374941	Q80U49 1xPhospho [S371]	S371	0.472348	Cep170b
Q80U49	GHGsRGSLDWPEEER.Q80U49	GHGsRGSLDWPEEER	-0.601504	0.00592843	0.0121831	Q80U49 1xPhospho [S1029]	S1029	0.472348	Cep170b
Q80U49	SGRsPEPDPAPPkETLTFAR.Q80U49	SGRsPEPDPAPPkETLTFAR	0.321805	0.166343	0.219398	Q80U49 1xPhospho [S843]	S843	0.472348	Cep170b
Q80U49	LGDAsDTEAVDGER.Q80U49	LGDAsDTEAVDGER	-0.309774	0.18346	0.238366	Q80U49 1xPhospho [S1122]	S1122	0.472348	Cep170b
Q80U49	SNsLSTPRPTR.Q80U49	SNsLSTPRPTR	-0.037594	0.8762	0.894446	Q80U49 1xPhospho [S1101]	S1101	0.472348	Cep170b
Q80U49	VVQTsPSAR.Q80U49	VVQTsPSAR	0.354887	0.125132	0.170786	Q80U49 1xPhospho [S819]	S819	0.472348	Cep170b
Q80U49	SQsFTHTPPADPk.Q80U49	SQsFTHTPPADPk	0.0225564	0.92655	0.937708	Q80U49 1xPhospho [S421]	S421	0.472348	Cep170b
Q80U49	LGNTsPVPR.Q80U49	LGNTsPVPR	0.109774	0.644162	0.695601	Q80U49 1xPhospho [S478]	S478	0.472348	Cep170b
Q80U49	ESPLsPPTVPDPGGATPGSAR.Q80U49	ESPLsPPTVPDPGGATPGSAR	-0.123308	0.603397	0.659756	Q80U49 1xPhospho [S981]	S981	0.472348	Cep170b
Q80U49	kQEEDDSLsDAGTYTIETEAQDQEVEEAR.Q80U49	kQEEDDSLsDAGTYTIETEAQDQEVEEAR	0.393985	0.0866607	0.124185	Q80U49 1xPhospho [S563]	S563	0.472348	Cep170b
Q80U56	DSLPSDsPPITVQPQANNR.Q80U56	DSLPSDsPPITVQPQANNR	-0.451128	0.0473768	0.0730043	Q80U56 1xPhospho [S368]	S368	0.781682	Avl9
Q80U87	SYsSPDITQALQEEEk.Q80U87	SYsSPDITQALQEEEk	0.413534	0.0711515	0.104441	Q80U87 1xPhospho [S680]	S680	0.687943	Usp8
Q80VC9	RsPGPGPSPTPR.Q80VC9	RsPGPGPSPTPR	0.849624	0	0	Q80VC9 1xPhospho [S767]	S767	-0.884559	Camsap3
Q80VC9	AAsPSPAR.Q80VC9	AAsPSPAR	0.774436	9.10218e-05	0.000333605	Q80VC9 1xPhospho [S754]	S754	-0.884559	Camsap3
Q80VC9	SVTFsPDLGPVPPEGLGDYNR.Q80VC9	SVTFsPDLGPVPPEGLGDYNR	0.616541	0.00457438	0.00967943	Q80VC9 1xPhospho [S683]	S683	-0.884559	Camsap3
Q80VC9	sPGPGPSPTPR.Q80VC9	sPGPGPSPTPR	0.4	0.0816402	0.11807	Q80VC9 1xPhospho [S767]	S767	-0.884559	Camsap3
Q80VC9	APsPSGLmSPSR.Q80VC9	APsPSGLmSPSR	0.649624	0.00247148	0.00567355	Q80VC9 1xPhospho [S1077]	S1077	-0.884559	Camsap3
Q80VC9	kFsPSQVPVQTR.Q80VC9	kFsPSQVPVQTR	0.903759	1.81463e-06	1.45728e-05	Q80VC9 1xPhospho [S812]	S812	-0.884559	Camsap3
Q80VC9	DLPDGHAVsPR.Q80VC9	DLPDGHAVsPR	0.711278	0.00063059	0.00173745	Q80VC9 1xPhospho [S334]	S334	-0.884559	Camsap3
Q80VP0	GDIFVSEPsPDLEAR.Q80VP0	GDIFVSEPsPDLEAR	-0.245113	0.296235	0.359115	Q80VP0 1xPhospho [S751]	S751	1.28081	Tecpr1
Q80W04	ALSGsATLVSSPk.Q80W04	ALSGsATLVSSPk	0.556391	0.0120956	0.0223049	Q80W04 1xPhospho [S461]	S461	-0.738691	Tmcc2
Q80W47	GAYVPSsPTR.Q80W47	GAYVPSsPTR	0.87218	0	0	Q80W47 1xPhospho [S395]	S395	1.58892	Wipi2
Q80X50	TQQsFEk.Q80X50	TQQsFEk	-0.43609	0.0559975	0.0843008	Q80X50 1xPhospho [S1012]	S1012	-0.760649	Ubap2l
Q80X80	NLGtPTSSTPRPSITPTkk.Q80X80	NLGtPTSSTPRPSITPTkk	0.735338	0.00033065	0.00101304	Q80X80 2xPhospho [T417; S/T]	T417	2.68569	C2cd2l
Q80XA6	VsLSHGYSk.Q80XA6	VsLSHGYSk	0.897744	9.64874e-07	8.66545e-06	Q80XA6 1xPhospho [S67]	S67	1.65479	Reps2
Q80XI3	TSsPTSLPPLAR.Q80XI3	TSsPTSLPPLAR	0.446617	0.0498458	0.0763092	Q80XI3 1xPhospho [S267]	S267	-0.914294	Eif4g3
Q80XI3	GSskDLLDNQSQEEQRR.Q80XI3	GSskDLLDNQSQEEQRR	0.784962	5.90806e-05	0.00022827	Q80XI3 1xPhospho [S1151]	S1151	-0.914294	Eif4g3
Q80XI3	ALTSRGsmGR.Q80XI3	ALTSRGsmGR	0.308271	0.185682	0.240589	Q80XI3 1xPhospho [S1126]	S1126	-0.914294	Eif4g3
Q80XK6	DFATAPPTsPAk.Q80XK6	DFATAPPTsPAk	0.451128	0.0473768	0.0730043	Q80XK6 1xPhospho [S1571]	S1571	0.42338	Atg2b
Q80XQ2	EFTGsPPPSATkk.Q80XQ2	EFTGsPPPSATkk	0.321805	0.166343	0.219398	Q80XQ2 1xPhospho [S578]	S578	0.534292	Tbc1d5
Q80Y24	TVsDLALQNAFGER.Q80Y24	TVsDLALQNAFGER	0.484211	0.032064	0.0525028	Q80Y24 1xPhospho [S754]	S754	0.172174	Prickle2
Q80Y24	YVTsDELLHk.Q80Y24	YVTsDELLHk	0.78797	5.16723e-05	0.000203319	Q80Y24 1xPhospho [S807]	S807	0.172174	Prickle2
Q80Y24	mHQsFDFDGGIASSk.Q80Y24	mHQsFDFDGGIASSk	0.00902256	0.972108	0.977508	Q80Y24 1xPhospho [S643]	S643	0.172174	Prickle2
Q80Y24	SRsDNALHLASER.Q80Y24	SRsDNALHLASER	0.357895	0.121794	0.166617	Q80Y24 1xPhospho [S696]	S696	0.172174	Prickle2
Q80Y24	QRsFQESLGQGSR.Q80Y24	QRsFQESLGQGSR	0.875188	0	0	Q80Y24 1xPhospho [S732]	S732	0.172174	Prickle2
Q80Y24	sAESVR.Q80Y24	sAESVR	0.843609	0	0	Q80Y24 1xPhospho [S602]	S602	0.172174	Prickle2
Q80YA9	QEVTGSSAVsPIR.Q80YA9	QEVTGSSAVsPIR	-0.296241	0.204132	0.261044	Q80YA9 1xPhospho [S756]	S756	0.611985	Cnksr2
Q80YA9	RQStLPTQk.Q80YA9	RQStLPTQk	-0.303759	0.19246	0.248142	Q80YA9 1xPhospho [T809]	T809	0.611985	Cnksr2
Q80YA9	RENsLLR.Q80YA9	RENsLLR	0.571429	0.0096326	0.0183824	Q80YA9 1xPhospho [S467]	S467	0.611985	Cnksr2
Q80YA9	GSEsPNSFLDQEYRk.Q80YA9	GSEsPNSFLDQEYRk	0.461654	0.0419875	0.0661733	Q80YA9 1xPhospho [S390]	S390	0.611985	Cnksr2
Q80YA9	sPTSSVATPSSTISTPTk.Q80YA9	sPTSSVATPSSTISTPTk	-0.332331	0.152316	0.203404	Q80YA9 1xPhospho [S325]	S325	0.611985	Cnksr2
Q80YA9	LGDsLQDLYR.Q80YA9	LGDsLQDLYR	0.485714	0.0314755	0.0516831	Q80YA9 1xPhospho [S906]	S906	0.611985	Cnksr2
Q80YA9	GSEsPNSFLDQEYR.Q80YA9	GSEsPNSFLDQEYR	0.562406	0.0110552	0.0207108	Q80YA9 1xPhospho [S390]	S390	0.611985	Cnksr2
Q80YA9	QEVTGSSAVsPIRk.Q80YA9	QEVTGSSAVsPIRk	0.463158	0.0412588	0.0651994	Q80YA9 1xPhospho [S756]	S756	0.611985	Cnksr2
Q80YF9	SAksEESLSSQASGAGLQR.Q80YF9	SAksEESLSSQASGAGLQR	0.192481	0.414491	0.480205	Q80YF9 1xPhospho [S660]	S660	-0.855245	Arhgap33
Q80YF9	TPAsPVER.Q80YF9	TPAsPVER	0.685714	0.00115823	0.00294949	Q80YF9 1xPhospho [S594]	S594	-0.855245	Arhgap33
Q80YN3	RLDsPR.Q80YN3	RLDsPR	0.938346	5.4992e-06	3.19496e-05	Q80YN3 1xPhospho [S341]	S341	4.37204	Bcas1
Q80Z38	ELDRFsLDSEDVYSR.Q80Z38	ELDRFsLDSEDVYSR	0.440602	0.0532928	0.0807976	Q80Z38 1xPhospho [S586]	S586	-0.419352	Shank2
Q80Z38	QksIDSR.Q80Z38	QksIDSR	0.329323	0.156234	0.208047	Q80Z38 1xPhospho [S474]	S474	-0.419352	Shank2
Q810B7	EDLLsPVQDADR.Q810B7	EDLLsPVQDADR	-0.0932331	0.695376	0.744413	Q810B7 1xPhospho [S845]	S845	0.301788	Slitrk5
Q811L6	SDsLPSFR.Q811L6	SDsLPSFR	0.637594	0.00311567	0.00694899	Q811L6 1xPhospho [S2517]	S2517	-1.14791	Mast4
Q811L6	SLSYSAsFPEAQPGVR.Q811L6	SLSYSAsFPEAQPGVR	0.771429	0.000102087	0.000367856	Q811L6 1xPhospho [S2461]	S2461	-1.14791	Mast4
Q811L6	mHsPPTIVR.Q811L6	mHsPPTIVR	0.479699	0.0338819	0.0552106	Q811L6 1xPhospho [S1417]	S1417	-1.14791	Mast4
Q811P8	VVYAFsPk.Q811P8	VVYAFsPk	0.0466165	0.846202	0.869102	Q811P8 1xPhospho [S892]	S892	0.917831	Arhgap32
Q811P8	AVsPEGDER.Q811P8	AVsPEGDER	0.685714	0.00115823	0.00294949	Q811P8 1xPhospho [S1823]	S1823	0.917831	Arhgap32
Q811P8	SVEERDVINRsPTQLQLGk.Q811P8	SVEERDVINRsPTQLQLGk	0.466165	0.0398311	0.0633689	Q811P8 1xPhospho [S952]	S952	0.917831	Arhgap32
Q811P8	NEsEPSEmk.Q811P8	NEsEPSEmk	0.863158	0	0	Q811P8 1xPhospho [S682]	S682	0.917831	Arhgap32
Q812A2	sTESIk.Q812A2	sTESIk	0.275188	0.239343	0.298449	Q812A2 1xPhospho [S407]	S407	-0.210188	Srgap3
Q812A2	SGGDTHsPPR.Q812A2	SGGDTHsPPR	0.252632	0.281279	0.343105	Q812A2 1xPhospho [S874]	S874	-0.210188	Srgap3
Q812A2	LRsDGAAIPR.Q812A2	LRsDGAAIPR	0.44812	0.0490119	0.0752283	Q812A2 1xPhospho [S858]	S858	-0.210188	Srgap3
Q812A2	GRIEsPEk.Q812A2	GRIEsPEk	0.321805	0.166343	0.219398	Q812A2 1xPhospho [S908]	S908	-0.210188	Srgap3
Q812A2	IEsPEkR.Q812A2	IEsPEkR	0.177444	0.452508	0.516619	Q812A2 1xPhospho [S908]	S908	-0.210188	Srgap3
Q812A2	RRsGGDTHsPPRGLGPSIDTPPR.Q812A2	RRsGGDTHsPPRGLGPSIDTPPR	-0.506767	0.024104	0.0408327	Q812A2 2xPhospho [S868; S874]	S868	-0.210188	Srgap3
Q8BFT9	SEDDAAsGEHDIQIEGVR.Q8BFT9	SEDDAAsGEHDIQIEGVR	0.589474	0.00723535	0.0143912	Q8BFT9 1xPhospho [S31]	S31	0.530174	Svop
Q8BFU3	NLsPPSVSSQmITk.Q8BFU3	NLsPPSVSSQmITk	0.500752	0.0260515	0.0435983	Q8BFU3 1xPhospho [S48]	S48	-0.344194	Rnf214
Q8BG05	GGsFGGR.Q8BG05	GGsFGGR	0.166917	0.48018	0.542421	Q8BG05 1xPhospho [S351]	S351	-1.11561	Hnrnpa3
Q8BG05	SSGsPYGGGYGSGGGSGGYGSR.Q8BG05	SSGsPYGGGYGSGGGSGGYGSR	0.496241	0.0275933	0.0458524	Q8BG05 1xPhospho [S359]	S359	-1.11561	Hnrnpa3
Q8BGD9	AFGsGYR.Q8BGD9	AFGsGYR	0.300752	0.197072	0.253532	Q8BGD9 1xPhospho [S283]	S283	-0.0589079	Eif4b
Q8BGD9	ERHPsWR.Q8BGD9	ERHPsWR	0.0721805	0.762467	0.802363	Q8BGD9 1xPhospho [S406]	S406	-0.0589079	Eif4b
Q8BGD9	ERHPsWRSEETQER.Q8BGD9	ERHPsWRSEETQER	0.431579	0.0588075	0.0878565	Q8BGD9 1xPhospho [S406]	S406	-0.0589079	Eif4b
Q8BGD9	ARPTTDsFDDYPPR.Q8BGD9	ARPTTDsFDDYPPR	0.633083	0.00339037	0.0074696	Q8BGD9 1xPhospho [S207]	S207	-0.0589079	Eif4b
Q8BGH4	SFsmQDLTTIR.Q8BGH4	SFsmQDLTTIR	0.323308	0.164286	0.217905	Q8BGH4 1xPhospho [S152]	S152	-1.21042	Reep1
Q8BGH4	SAsESAGSSGTA.Q8BGH4	SAsESAGSSGTA	0.822556	4.73313e-06	2.94763e-05	Q8BGH4 1xPhospho [S192]	S192	-1.21042	Reep1
Q8BGT8	LDHALSSPSsPcEEIk.Q8BGT8	LDHALSSPSsPcEEIk	0.466165	0.0398311	0.0633689	Q8BGT8 1xPhospho [S15]	S15	-0.063473	Phyhipl
Q8BH66	DRNsWGGFSEk.Q8BH66	DRNsWGGFSEk	0.428571	0.0607406	0.090572	Q8BH66 1xPhospho [S10]	S10	0.82179	Atl1
Q8BH66	SSDWsSEEEEPVRk.Q8BH66	SSDWsSEEEEPVRk	0.56391	0.0108068	0.020359	Q8BH66 1xPhospho [S22]	S22	0.82179	Atl1
Q8BHL3	RAsAGPVPGAVVIAEGLHPsLPSPTGNSTPLGTSk.Q8BHL3	RAsAGPVPGAVVIAEGLHPsLPSPTGNSTPLGTSk	-0.231579	0.324388	0.387454	Q8BHL3 2xPhospho [S673; S690]	S673	0.870317	Tbc1d10b
Q8BHL3	AVGGAPsPPPPVR.Q8BHL3	AVGGAPsPPPPVR	0.165414	0.484202	0.545917	Q8BHL3 1xPhospho [S664]	S664	0.870317	Tbc1d10b
Q8BHL3	HGAPAAPsPPPR.Q8BHL3	HGAPAAPsPPPR	0.168421	0.476175	0.539451	Q8BHL3 1xPhospho [S22]	S22	0.870317	Tbc1d10b
Q8BHL3	ASPVPGPGtPTR.Q8BHL3	ASPVPGPGtPTR	-0.409023	0.0745263	0.108919	Q8BHL3 1xPhospho [T136]	T136	0.870317	Tbc1d10b
Q8BHL3	AVGGAPsPPPPVRR.Q8BHL3	AVGGAPsPPPPVRR	-0.282707	0.226335	0.284339	Q8BHL3 1xPhospho [S664]	S664	0.870317	Tbc1d10b
Q8BHL3	RHGAPAAPsPPPRGSR.Q8BHL3	RHGAPAAPsPPPRGSR	-0.156391	0.508693	0.569978	Q8BHL3 1xPhospho [S22]	S22	0.870317	Tbc1d10b
Q8BHL3	RHGAPAAPsPPPR.Q8BHL3	RHGAPAAPsPPPR	0.0285714	0.906366	0.919654	Q8BHL3 1xPhospho [S22]	S22	0.870317	Tbc1d10b
Q8BI84	DSLPSGPREEAkPAsPSSVQDR.Q8BI84	DSLPSGPREEAkPAsPSSVQDR	0.506767	0.024104	0.0408327	Q8BI84 1xPhospho [S1915]	S1915	-0.183824	Mia3
Q8BIE6	VRsPHYVHSTR.Q8BIE6	VRsPHYVHSTR	0.842105	0	0	Q8BIE6 1xPhospho [S666]	S666	-2.89445	Frmd4a
Q8BIE6	FPSTGScTEAGVSSSLQNsPIR.Q8BIE6	FPSTGScTEAGVSSSLQNsPIR	0.639098	0.0030283	0.00678628	Q8BIE6 1xPhospho [S642]	S642	-2.89445	Frmd4a
Q8BIE6	mWSESsLDEPYEk.Q8BIE6	mWSESsLDEPYEk	0.807519	1.80072e-05	8.10153e-05	Q8BIE6 1xPhospho [S601]	S601	-2.89445	Frmd4a
Q8BIE6	LTPSRsQILR.Q8BIE6	LTPSRsQILR	0.821053	5.69638e-06	3.22202e-05	Q8BIE6 1xPhospho [S882]	S882	-2.89445	Frmd4a
Q8BIE6	SVDIsPTR.Q8BIE6	SVDIsPTR	0.867669	0	0	Q8BIE6 1xPhospho [S679]	S679	-2.89445	Frmd4a
Q8BIE6	LLGSENDTGsPDFYTPR.Q8BIE6	LLGSENDTGsPDFYTPR	0.912782	3.00375e-06	2.15301e-05	Q8BIE6 1xPhospho [S712]	S712	-2.89445	Frmd4a
Q8BIE6	AAGALGSASSGsmPNLAAR.Q8BIE6	AAGALGSASSGsmPNLAAR	0.828571	1.53983e-06	1.29864e-05	Q8BIE6 1xPhospho [S785]	S785	-2.89445	Frmd4a
Q8BIE6	SSsLESQGk.Q8BIE6	SSsLESQGk	0.843609	0	0	Q8BIE6 1xPhospho [S696]	S696	-2.89445	Frmd4a
Q8BIE6	SGAASTGGGVYLHSQsQPSSQYR.Q8BIE6	SGAASTGGGVYLHSQsQPSSQYR	0.691729	0.00100994	0.00262584	Q8BIE6 1xPhospho [S808]	S808	-2.89445	Frmd4a
Q8BJ42	IIEsPER.Q8BJ42	IIEsPER	0.884211	0	0	Q8BJ42 1xPhospho [S983]	S983	2.73914	Dlgap2
Q8BJ42	NEsPGRIR.Q8BJ42	NEsPGRIR	0.147368	0.533777	0.595532	Q8BJ42 1xPhospho [S228]	S228	2.73914	Dlgap2
Q8BJ42	IIEsPERkEER.Q8BJ42	IIEsPERkEER	0.917293	3.54614e-06	2.4256e-05	Q8BJ42 1xPhospho [S983]	S983	2.73914	Dlgap2
Q8BJ42	SHsLEGSSk.Q8BJ42	SHsLEGSSk	0.774436	9.10218e-05	0.000333605	Q8BJ42 1xPhospho [S248]	S248	2.73914	Dlgap2
Q8BJ42	EksLDLPDR.Q8BJ42	EksLDLPDR	0.846617	0	0	Q8BJ42 1xPhospho [S1012]	S1012	2.73914	Dlgap2
Q8BJ42	sIDkAVLASk.Q8BJ42	sIDkAVLASk	0.639098	0.0030283	0.00678628	Q8BJ42 1xPhospho [S700]	S700	2.73914	Dlgap2
Q8BJ42	ADsIEIYIPEAQTR.Q8BJ42	ADsIEIYIPEAQTR	0.568421	0.0100891	0.019114	Q8BJ42 1xPhospho [S1047]	S1047	2.73914	Dlgap2
Q8BJ42	GLQFGSSFQRHsEPSTPTQYGALR.Q8BJ42	GLQFGSSFQRHsEPSTPTQYGALR	0.724812	0.0004431	0.00128877	Q8BJ42 1xPhospho [S811]	S811	2.73914	Dlgap2
Q8BJ42	EksLDLPDRQR.Q8BJ42	EksLDLPDRQR	0.870677	0	0	Q8BJ42 1xPhospho [S1012]	S1012	2.73914	Dlgap2
Q8BJH1	ASSVNSPLGNkPQTLsPSHR.Q8BJH1	ASSVNSPLGNkPQTLsPSHR	0.705263	0.000732211	0.0019849	Q8BJH1 1xPhospho [S222]	S222	-1.11895	Zc2hc1a
Q8BJI1	mmkDIsNLEENDETR.Q8BJI1	mmkDIsNLEENDETR	0.628571	0.00368474	0.00799833	Q8BJI1 1xPhospho [S665]	S665	3.01984	Slc6a17
Q8BJI1	DIsNLEENDETR.Q8BJI1	DIsNLEENDETR	0.509774	0.0231751	0.0395152	Q8BJI1 1xPhospho [S665]	S665	3.01984	Slc6a17
Q8BJU0	APDRtPPSEEDSAEAER.Q8BJU0	APDRtPPSEEDSAEAER	-0.0105263	0.967039	0.972827	Q8BJU0 1xPhospho [T82]	T82	-0.973249	Sgta
Q8BK08	LGPGGGGsRER.Q8BK08	LGPGGGGsRER	0.475188	0.0357808	0.0579039	Q8BK08 1xPhospho [S16]	S16	1.26355	Tmem11
Q8BKX1	SLsPPQSQSk.Q8BKX1	SLsPPQSQSk	0.854135	0	0	Q8BKX1 1xPhospho [S326]	S326	2.30445	Baiap2
Q8BL65	TSSESIVSVPASSTSGsPSR.Q8BL65	TSSESIVSVPASSTSGsPSR	0.86015	0	0	Q8BL65 1xPhospho [S294]	S294	2.09551	Ablim2
Q8BL65	TNsPDLDSQSLSLSSGTDQEPLQR.Q8BL65	TNsPDLDSQSLSLSSGTDQEPLQR	-0.691729	0.00100994	0.00262584	Q8BL65 1xPhospho [S477]	S477	2.09551	Ablim2
Q8BLK9	SsPDQFLFSSLR.Q8BLK9	SsPDQFLFSSLR	0.511278	0.0227216	0.0388828	Q8BLK9 1xPhospho [S779]	S779	-0.148703	Rps6kc1
Q8BLK9	kGVDLLLEGVQGESsPTRR.Q8BLK9	kGVDLLLEGVQGESsPTRR	-0.0932331	0.695376	0.744413	Q8BLK9 1xPhospho [S281]	S281	-0.148703	Rps6kc1
Q8BLK9	VFSGGEDLEAVSsPPTSESLSR.Q8BLK9	VFSGGEDLEAVSsPPTSESLSR	-0.190977	0.41821	0.483325	Q8BLK9 1xPhospho [S577]	S577	-0.148703	Rps6kc1
Q8BLR2	HGNtAGk.Q8BLR2	HGNtAGk	0.357895	0.121794	0.166617	Q8BLR2 1xPhospho [T137]	T137	-0.101294	Cpne4
Q8BM65	SSSSVPHTTPRPVsQDGAk.Q8BM65	SSSSVPHTTPRPVsQDGAk	0.720301	0.000499772	0.00142541	Q8BM65 1xPhospho [S510]	S510	1.27077	Nyap2
Q8BM65	FTVPASHsPPR.Q8BM65	FTVPASHsPPR	0.523308	0.0193447	0.0335185	Q8BM65 1xPhospho [S184]	S184	1.27077	Nyap2
Q8BM65	SAsTSGVPPPSVTPLR.Q8BM65	SAsTSGVPPPSVTPLR	-0.263158	0.261163	0.321905	Q8BM65 1xPhospho [S651]	S651	1.27077	Nyap2
Q8BMG7	GGFsPFGNTQGPSR.Q8BMG7	GGFsPFGNTQGPSR	-0.17594	0.456409	0.519811	Q8BMG7 1xPhospho [S448]	S448	1.15359	Rab3gap2
Q8BPN8	LSEkQLDHEsDDADREDEER.Q8BPN8	LSEkQLDHEsDDADREDEER	0.366917	0.112171	0.155258	Q8BPN8 1xPhospho [S423]	S423	2.19923	Dmxl2
Q8BPN8	kQsEVEADLGYPGGk.Q8BPN8	kQsEVEADLGYPGGk	0.869173	0	0	Q8BPN8 1xPhospho [S2636]	S2636	2.19923	Dmxl2
Q8BPN8	ESEAGTGSSEHEDGEREGsPR.Q8BPN8	ESEAGTGSSEHEDGEREGsPR	0.17594	0.456409	0.519811	Q8BPN8 1xPhospho [S473]	S473	2.19923	Dmxl2
Q8BPN8	LDHELsLDR.Q8BPN8	LDHELsLDR	0.577444	0.0087704	0.0169292	Q8BPN8 1xPhospho [S451]	S451	2.19923	Dmxl2
Q8BPN8	NLAsPEGTLATLGLkTEk.Q8BPN8	NLAsPEGTLATLGLkTEk	-0.0601504	0.801607	0.834224	Q8BPN8 1xPhospho [S1856]	S1856	2.19923	Dmxl2
Q8BPN8	RQsESIAAPPVASEDmDk.Q8BPN8	RQsESIAAPPVASEDmDk	0.157895	0.504569	0.566166	Q8BPN8 1xPhospho [S2394]	S2394	2.19923	Dmxl2
Q8BPN8	RQsESIAAPPVASEDmDkHR.Q8BPN8	RQsESIAAPPVASEDmDkHR	0.395489	0.0853843	0.12273	Q8BPN8 1xPhospho [S2394]	S2394	2.19923	Dmxl2
Q8BPN8	RkQsEVEADLGYPGGk.Q8BPN8	RkQsEVEADLGYPGGk	0.601504	0.00592843	0.0121831	Q8BPN8 1xPhospho [S2636]	S2636	2.19923	Dmxl2
Q8BPQ7	cSSGAsLDSHLHR.Q8BPQ7	cSSGAsLDSHLHR	0.506767	0.024104	0.0408327	Q8BPQ7 1xPhospho [S633]	S633	1.62259	Sgsm1
Q8BQP9	RGsGSESAHk.Q8BQP9	RGsGSESAHk	0.920301	3.8853e-06	2.58983e-05	Q8BQP9 1xPhospho [S38]	S38	3.60244	Rgs7bp
Q8BR92	AELVLIDEDDEksLREk.Q8BR92	AELVLIDEDDEksLREk	0.463158	0.0412588	0.0651994	Q8BR92 1xPhospho [S315]	S315	0.00220702	Palm2
Q8BR92	AGQSsFRR.Q8BR92	AGQSsFRR	-0.157895	0.504569	0.566166	Q8BR92 1xPhospho [S210]	S210	0.00220702	Palm2
Q8BRK8	ScsAAGLHR.Q8BRK8	ScsAAGLHR	0.0676692	0.777083	0.814829	Q8BRK8 1xPhospho [S491]	S491	0.5104	Prkaa2
Q8BRT1	SSSSsQESLNRPFSSk.Q8BRT1	SSSSsQESLNRPFSSk	0.786466	5.52894e-05	0.000215391	Q8BRT1 1xPhospho [S333]	S333	-0.601906	Clasp2
Q8BRT1	LGAGALNPGSYASLEDTsDkmDGTASDDGRVR.Q8BRT1	LGAGALNPGSYASLEDTsDkmDGTASDDGRVR	-0.0526316	0.826316	0.853147	Q8BRT1 1xPhospho [S418]	S418	-0.601906	Clasp2
Q8BRT1	GVTEAIQNFSFRsQEDmSEPVR.Q8BRT1	GVTEAIQNFSFRsQEDmSEPVR	0.711278	0.00063059	0.00173745	Q8BRT1 1xPhospho [S947]	S947	-0.601906	Clasp2
Q8BRT1	EAsPSRLSVAR.Q8BRT1	EAsPSRLSVAR	0.100752	0.671918	0.722919	Q8BRT1 1xPhospho [S513]	S513	-0.601906	Clasp2
Q8BRT1	mVSQSQPGsR.Q8BRT1	mVSQSQPGsR	0.401504	0.0804202	0.116592	Q8BRT1 1xPhospho [S465]	S465	-0.601906	Clasp2
Q8BRT1	DTsPVR.Q8BRT1	DTsPVR	0.396992	0.0841221	0.121212	Q8BRT1 1xPhospho [S547]	S547	-0.601906	Clasp2
Q8BRV5	RDEsDEEPPRVER.Q8BRV5	RDEsDEEPPRVER	0.822556	4.73313e-06	2.94763e-05	Q8BRV5 1xPhospho [S205]	S205	2.33001	Kiaa1671
Q8BSS9	LAIQEmVSLTsPSAPPTSR.Q8BSS9	LAIQEmVSLTsPSAPPTSR	0.550376	0.0132148	0.0240855	Q8BSS9 1xPhospho [S966]	S966	-0.877984	Ppfia2
Q8BSS9	LTPRsPAR.Q8BSS9	LTPRsPAR	0.509774	0.0231751	0.0395152	Q8BSS9 1xPhospho [S731]	S731	-0.877984	Ppfia2
Q8BSS9	VASVsLEGLNLAR.Q8BSS9	VASVsLEGLNLAR	0.278195	0.234082	0.292976	Q8BSS9 1xPhospho [S689]	S689	-0.877984	Ppfia2
Q8BSS9	VksLGDHEWNR.Q8BSS9	VksLGDHEWNR	0.273684	0.242002	0.30065	Q8BSS9 1xPhospho [S594]	S594	-0.877984	Ppfia2
Q8BTG7	RLsGGAVPSASmTR.Q8BTG7	RLsGGAVPSASmTR	-0.445113	0.0506908	0.0773511	Q8BTG7 1xPhospho [S298]	S298	-0.540108	Ndrg4
Q8BTI8	DGLPRtPSRR.Q8BTI8	DGLPRtPSRR	0.634586	0.00329667	0.00729733	Q8BTI8 1xPhospho [T1390]	T1390	-1.25103	Srrm2
Q8BTI8	VPsPTPVPk.Q8BTI8	VPsPTPVPk	0.63609	0.00320512	0.00713495	Q8BTI8 1xPhospho [S2535]	S2535	-1.25103	Srrm2
Q8BTI8	SSsPVTELTARsPVkQDk.Q8BTI8	SSsPVTELTARsPVkQDk	0.318797	0.170513	0.224018	Q8BTI8 2xPhospho [S1068; S1077]	S1068	-1.25103	Srrm2
Q8BTI8	VSsPVLETVQQR.Q8BTI8	VSsPVLETVQQR	0.693233	0.000975399	0.00254447	Q8BTI8 1xPhospho [S1360]	S1360	-1.25103	Srrm2
Q8BTI8	SEQPLSQVLPSLsPEHk.Q8BTI8	SEQPLSQVLPSLsPEHk	0.446617	0.0498458	0.0763092	Q8BTI8 1xPhospho [S1216]	S1216	-1.25103	Srrm2
Q8BTI8	VTSRtPQRk.Q8BTI8	VTSRtPQRk	0.655639	0.00219322	0.00510955	Q8BTI8 1xPhospho [T919]	T919	-1.25103	Srrm2
Q8BTI8	SNsPQPk.Q8BTI8	SNsPQPk	0.730827	0.000375653	0.00112314	Q8BTI8 1xPhospho [S814]	S814	-1.25103	Srrm2
Q8BTI8	SSsPVTELTAR.Q8BTI8	SSsPVTELTAR	0.610526	0.00508152	0.0106948	Q8BTI8 1xPhospho [S1068]	S1068	-1.25103	Srrm2
Q8BTI8	SVtPQRER.Q8BTI8	SVtPQRER	0.803008	2.38516e-05	0.000103167	Q8BTI8 1xPhospho [T1467]	T1467	-1.25103	Srrm2
Q8BTI8	SRAsPVSR.Q8BTI8	SRAsPVSR	0.766917	0.000120519	0.000426438	Q8BTI8 1xPhospho [S1869]	S1869	-1.25103	Srrm2
Q8BTI8	VkTVIsPR.Q8BTI8	VkTVIsPR	0.606015	0.00549153	0.0114148	Q8BTI8 1xPhospho [S898]	S898	-1.25103	Srrm2
Q8BTI8	NSGPVSEVNTGFsPEVk.Q8BTI8	NSGPVSEVNTGFsPEVk	0.789474	4.82234e-05	0.000191672	Q8BTI8 1xPhospho [S1305]	S1305	-1.25103	Srrm2
Q8BTI8	APsPASR.Q8BTI8	APsPASR	0.819549	6.73162e-06	3.38451e-05	Q8BTI8 1xPhospho [S2381]	S2381	-1.25103	Srrm2
Q8BTI8	DTPQtPSR.Q8BTI8	DTPQtPSR	0.625564	0.00389246	0.00838732	Q8BTI8 1xPhospho [T1428]	T1428	-1.25103	Srrm2
Q8BTI8	ELSHsPPR.Q8BTI8	ELSHsPPR	0.281203	0.228898	0.287099	Q8BTI8 1xPhospho [S1278]	S1278	-1.25103	Srrm2
Q8BTI8	VSGRTsPLmLDR.Q8BTI8	VSGRTsPLmLDR	0.76391	0.000134123	0.000461392	Q8BTI8 1xPhospho [S2351]	S2351	-1.25103	Srrm2
Q8BTI8	SRTsPVSR.Q8BTI8	SRTsPVSR	0.726316	0.000425399	0.00124498	Q8BTI8 1xPhospho [S1849]	S1849	-1.25103	Srrm2
Q8BTI8	SGAGsPPGkR.Q8BTI8	SGAGsPPGkR	0.762406	0.000141345	0.000484817	Q8BTI8 1xPhospho [S1179]	S1179	-1.25103	Srrm2
Q8BTI8	ELSHsPPRENSFESSLEFk.Q8BTI8	ELSHsPPRENSFESSLEFk	0.843609	0	0	Q8BTI8 1xPhospho [S1278]	S1278	-1.25103	Srrm2
Q8BTI8	RVPsPTPVPk.Q8BTI8	RVPsPTPVPk	0.830075	8.92184e-07	8.16852e-06	Q8BTI8 1xPhospho [S2535]	S2535	-1.25103	Srrm2
Q8BTI8	GDSHsPGHk.Q8BTI8	GDSHsPGHk	0.556391	0.0120956	0.0223049	Q8BTI8 1xPhospho [S2681]	S2681	-1.25103	Srrm2
Q8BTI8	ERAPsPASR.Q8BTI8	ERAPsPASR	0.780451	7.156e-05	0.000271144	Q8BTI8 1xPhospho [S2381]	S2381	-1.25103	Srrm2
Q8BX70	TANAsLEEIIDk.Q8BX70	TANAsLEEIIDk	0.876692	0	0	Q8BX70 1xPhospho [S736]	S736	2.4302	Vps13c
Q8BX70	SSTPsPER.Q8BX70	SSTPsPER	0.957895	6.40648e-06	3.38235e-05	Q8BX70 1xPhospho [S841]	S841	2.4302	Vps13c
Q8BX70	ILLENLGEAsSQPSPTQYAQEAAR.Q8BX70	ILLENLGEAsSQPSPTQYAQEAAR	0.651128	0.00239933	0.00554036	Q8BX70 1xPhospho [S1887]	S1887	2.4302	Vps13c
Q8BX70	SSTPsPERQVASIPVLSGGTk.Q8BX70	SSTPsPERQVASIPVLSGGTk	0.296241	0.204132	0.261044	Q8BX70 1xPhospho [S841]	S841	2.4302	Vps13c
Q8BXK8	LDPPPsPHANR.Q8BXK8	LDPPPsPHANR	0.509774	0.0231751	0.0395152	Q8BXK8 1xPhospho [S521]	S521	-0.695002	Agap1
Q8BXR9	QNEIVRsPR.Q8BXR9	QNEIVRsPR	-0.368421	0.110623	0.153386	Q8BXR9 1xPhospho [S190]	S190	0.585455	Osbpl6
Q8BXR9	TAsSSTEPSVSR.Q8BXR9	TAsSSTEPSVSR	0.757895	0.000164795	0.000552367	Q8BXR9 1xPhospho [S44]	S44	0.585455	Osbpl6
Q8BY87	STETSDFENIEsPLNER.Q8BY87	STETSDFENIEsPLNER	0.744361	0.000253438	0.000806955	Q8BY87 1xPhospho [S911]	S911	-1.3844	Usp47
Q8BY87	GSsTSVDNR.Q8BY87	GSsTSVDNR	0.598496	0.0062353	0.0126918	Q8BY87 1xPhospho [S919]	S919	-1.3844	Usp47
Q8BZ98	RPPPsPTRPTIIRPLESSLLD.Q8BZ98	RPPPsPTRPTIIRPLESSLLD	0.0406015	0.86618	0.886525	Q8BZ98 1xPhospho [S847]	S847	0.827219	Dnm3
Q8C015	RksLVGTPYWmAPEVISR.Q8C015	RksLVGTPYWmAPEVISR	0.464662	0.04054	0.0643661	Q8C015 1xPhospho [S602]	S602	-0.0869058	Pak5
Q8C015	AQmVFsPPLSGSDTYPR.Q8C015	AQmVFsPPLSGSDTYPR	0.288722	0.216276	0.274486	Q8C015 1xPhospho [S341]	S341	-0.0869058	Pak5
Q8C015	SksGSGLQEPmmPFGASAFk.Q8C015	SksGSGLQEPmmPFGASAFk	0.57594	0.00897977	0.0172485	Q8C015 1xPhospho [S288]	S288	-0.0869058	Pak5
Q8C052	kPPPPAsPGSSDSSAR.Q8C052	kPPPPAsPGSSDSSAR	0.162406	0.492298	0.554513	Q8C052 1xPhospho [S684]	S684	-0.710692	Map1s
Q8C078	sPLSGR.Q8C078	sPLSGR	-0.466165	0.0398311	0.0633689	Q8C078 1xPhospho [S91]	S91	1.37526	Camkk2
Q8C078	SLsAPGNLLTk.Q8C078	SLsAPGNLLTk	0.63609	0.00320512	0.00713495	Q8C078 1xPhospho [S511]	S511	1.37526	Camkk2
Q8C078	DQPPEADGQELPLEASDPESRsPLSGR.Q8C078	DQPPEADGQELPLEASDPESRsPLSGR	-0.0330827	0.891264	0.908248	Q8C078 1xPhospho [S91]	S91	1.37526	Camkk2
Q8C078	sFGNPFEGSR.Q8C078	sFGNPFEGSR	0.606015	0.00549153	0.0114148	Q8C078 1xPhospho [S495]	S495	1.37526	Camkk2
Q8C079	AAsPPASASDLIEQQQk.Q8C079	AAsPPASASDLIEQQQk	0.257143	0.272541	0.333657	Q8C079 1xPhospho [S335]	S335	-0.382299	Strip1
Q8C079	AAsPPASASDLIEQQQkR.Q8C079	AAsPPASASDLIEQQQkR	0.494737	0.0281232	0.0465685	Q8C079 1xPhospho [S335]	S335	-0.382299	Strip1
Q8C0E2	SmsHQAAIASQR.Q8C0E2	SmsHQAAIASQR	-0.35188	0.128536	0.174925	Q8C0E2 1xPhospho [S304]	S304	0.207538	Vps26b
Q8C0E2	kSmsHQAAIASQR.Q8C0E2	kSmsHQAAIASQR	-0.329323	0.156234	0.208047	Q8C0E2 1xPhospho [S304]	S304	0.207538	Vps26b
Q8C0T5	SIsSDGRPLER.Q8C0T5	SIsSDGRPLER	0.864662	0	0	Q8C0T5 1xPhospho [S1116]	S1116	1.40017	Sipa1l1
Q8C0T5	TLsDESIYSSQR.Q8C0T5	TLsDESIYSSQR	0.936842	5.39341e-06	3.15689e-05	Q8C0T5 1xPhospho [S1564]	S1564	1.40017	Sipa1l1
Q8C0T5	SsPkEELHPTASSQLAPSFSSSSSSSSGPR.Q8C0T5	SsPkEELHPTASSQLAPSFSSSSSSSSGPR	0.864662	0	0	Q8C0T5 1xPhospho [S1422]	S1422	1.40017	Sipa1l1
Q8C0T5	RSPAsIDRQNTQSDISGSGk.Q8C0T5	RSPAsIDRQNTQSDISGSGk	0.774436	9.10218e-05	0.000333605	Q8C0T5 1xPhospho [S1184]	S1184	1.40017	Sipa1l1
Q8C0T5	SQGGSsPLSR.Q8C0T5	SQGGSsPLSR	0.658647	0.00206409	0.00485681	Q8C0T5 1xPhospho [S1384]	S1384	1.40017	Sipa1l1
Q8C0T5	VAPLWHSsSEVLSLADR.Q8C0T5	VAPLWHSsSEVLSLADR	-0.490226	0.0297617	0.0490745	Q8C0T5 1xPhospho [S1345]	S1345	1.40017	Sipa1l1
Q8C170	SLGGmsPSEER.Q8C170	SLGGmsPSEER	0.547368	0.0138052	0.0250066	Q8C170 1xPhospho [S1300]	S1300	-0.628951	Myo9a
Q8C170	sLEILQR.Q8C170	sLEILQR	0.0977444	0.681267	0.730972	Q8C170 1xPhospho [S755]	S755	-0.628951	Myo9a
Q8C1B1	EQQAWVIsPPQPSPQk.Q8C1B1	EQQAWVIsPPQPSPQk	0.413534	0.0711515	0.104441	Q8C1B1 1xPhospho [S905]	S905	0.434741	Camsap2
Q8C1B1	LNQSsPDNLTDTk.Q8C1B1	LNQSsPDNLTDTk	0.590977	0.00706009	0.0140783	Q8C1B1 1xPhospho [S573]	S573	0.434741	Camsap2
Q8C1B1	RPVtPk.Q8C1B1	RPVtPk	-0.186466	0.42948	0.493923	Q8C1B1 1xPhospho [T1452]	T1452	0.434741	Camsap2
Q8C1B1	RFsPSQVPIQTR.Q8C1B1	RFsPSQVPIQTR	-0.273684	0.242002	0.30065	Q8C1B1 1xPhospho [S992]	S992	0.434741	Camsap2
Q8C1B1	EALsPcPSTISTk.Q8C1B1	EALsPcPSTISTk	-0.108271	0.648757	0.6996	Q8C1B1 1xPhospho [S647]	S647	0.434741	Camsap2
Q8C1B1	SVsNEGLTLNNSR.Q8C1B1	SVsNEGLTLNNSR	0.240602	0.305444	0.36838	Q8C1B1 1xPhospho [S439]	S439	0.434741	Camsap2
Q8C2Q3	SPLRRsPPR.Q8C2Q3	SPLRRsPPR	-0.112782	0.635011	0.689198	Q8C2Q3 1xPhospho [S220]	S220	-2.16006	Rbm14
Q8C2Q3	QPtPPFFGR.Q8C2Q3	QPtPPFFGR	0.81203	1.31022e-05	6.26616e-05	Q8C2Q3 1xPhospho [T206]	T206	-2.16006	Rbm14
Q8C2Q3	sPTkSSLDYR.Q8C2Q3	sPTkSSLDYR	0.852632	0	0	Q8C2Q3 1xPhospho [S627]	S627	-2.16006	Rbm14
Q8C2Q3	TRLsPPR.Q8C2Q3	TRLsPPR	0.544361	0.0144169	0.0259747	Q8C2Q3 1xPhospho [S582]	S582	-2.16006	Rbm14
Q8C2Q3	DRsPLRRsPPR.Q8C2Q3	DRsPLRRsPPR	0.467669	0.0391321	0.0624256	Q8C2Q3 2xPhospho [S215; S220]	S215	-2.16006	Rbm14
Q8C2Q3	RLsESQLSFR.Q8C2Q3	RLsESQLSFR	0.500752	0.0260515	0.0435983	Q8C2Q3 1xPhospho [S618]	S618	-2.16006	Rbm14
Q8C419	SLsVIASAk.Q8C419	SLsVIASAk	0.897744	9.64874e-07	8.66545e-06	Q8C419 1xPhospho [S904]	S904	5.56159	Gpr158
Q8C437	NHsLEEEFER.Q8C437	NHsLEEEFER	0.846617	0	0	Q8C437 1xPhospho [S202]	S202	2.2692	Pex5l
Q8C437	sPVDSSVLEGVk.Q8C437	sPVDSSVLEGVk	0.431579	0.0588075	0.0878565	Q8C437 1xPhospho [S388]	S388	2.2692	Pex5l
Q8C437	RmskSPVDSSVLEGVk.Q8C437	RmskSPVDSSVLEGVk	0.296241	0.204132	0.261044	Q8C437 1xPhospho [S386]	S386	2.2692	Pex5l
Q8C7M3	RAsGSGVSDYDYLDLDk.Q8C7M3	RAsGSGVSDYDYLDLDk	0.532331	0.0170885	0.0300517	Q8C7M3 1xPhospho [S53]	S53	3.58825	Trim9
Q8C8R3	ELEEEWVIVsDEEIQEAk.Q8C8R3	ELEEEWVIVsDEEIQEAk	0.393985	0.0866607	0.124185	Q8C8R3 1xPhospho [S1562]	S1562	0.155717	Ank2
Q8C8R3	HsPVSSLk.Q8C8R3	HsPVSSLk	0.290226	0.213809	0.271648	Q8C8R3 1xPhospho [S1851]	S1851	0.155717	Ank2
Q8C8R3	HLPGsPSIR.Q8C8R3	HLPGsPSIR	0.521805	0.0197431	0.0341335	Q8C8R3 1xPhospho [S1900]	S1900	0.155717	Ank2
Q8C8R3	TEkQPPIsPTSk.Q8C8R3	TEkQPPIsPTSk	0.675188	0.00146046	0.00355741	Q8C8R3 1xPhospho [S1936]	S1936	0.155717	Ank2
Q8C8R3	YsLEGGR.Q8C8R3	YsLEGGR	0.434586	0.0569223	0.0855289	Q8C8R3 1xPhospho [S890]	S890	0.155717	Ank2
Q8C8R3	ESEsDQEPEEEIGmTSEk.Q8C8R3	ESEsDQEPEEEIGmTSEk	0.111278	0.63958	0.691923	Q8C8R3 1xPhospho [S1428]	S1428	0.155717	Ank2
Q8C8R3	IktFDELEQEAk.Q8C8R3	IktFDELEQEAk	0.675188	0.00146046	0.00355741	Q8C8R3 1xPhospho [T2556]	T2556	0.155717	Ank2
Q8C8R3	QPPIsPTSk.Q8C8R3	QPPIsPTSk	0.657143	0.00212785	0.00498688	Q8C8R3 1xPhospho [S1936]	S1936	0.155717	Ank2
Q8C8R3	EESsPRk.Q8C8R3	EESsPRk	0.586466	0.00759661	0.0149455	Q8C8R3 1xPhospho [S3781]	S3781	0.155717	Ank2
Q8C8R3	sPQGLELPLPNR.Q8C8R3	sPQGLELPLPNR	-0.242105	0.302355	0.365404	Q8C8R3 1xPhospho [S2364]	S2364	0.155717	Ank2
Q8C8R3	SSQSERELEEEWVIVsDEEIQEAk.Q8C8R3	SSQSERELEEEWVIVsDEEIQEAk	0.500752	0.0260515	0.0435983	Q8C8R3 1xPhospho [S1562]	S1562	0.155717	Ank2
Q8C8R3	DPDGsAEDDSLEQTSLmESSGk.Q8C8R3	DPDGsAEDDSLEQTSLmESSGk	-0.0481203	0.841221	0.865876	Q8C8R3 1xPhospho [S2475]	S2475	0.155717	Ank2
Q8C8R3	TEkHPPVsPGkTEk.Q8C8R3	TEkHPPVsPGkTEk	0.696241	0.000909209	0.00239571	Q8C8R3 1xPhospho [S1889]	S1889	0.155717	Ank2
Q8C8R3	EAERNsYR.Q8C8R3	EAERNsYR	0.622556	0.00410974	0.00879111	Q8C8R3 1xPhospho [S944]	S944	0.155717	Ank2
Q8C8R3	LLRDPDGsAEDDSLEQTSLmESSGk.Q8C8R3	LLRDPDGsAEDDSLEQTSLmESSGk	0.449624	0.0481889	0.0741101	Q8C8R3 1xPhospho [S2475]	S2475	0.155717	Ank2
Q8C8R3	QPPIsPTSkTER.Q8C8R3	QPPIsPTSkTER	-0.0481203	0.841221	0.865876	Q8C8R3 1xPhospho [S1936]	S1936	0.155717	Ank2
Q8C8R3	GADsGLLTEPVIR.Q8C8R3	GADsGLLTEPVIR	0.4	0.0816402	0.11807	Q8C8R3 1xPhospho [S2639]	S2639	0.155717	Ank2
Q8C8R3	GsPIVQEPEEASEPk.Q8C8R3	GsPIVQEPEEASEPk	-0.206015	0.381848	0.448347	Q8C8R3 1xPhospho [S3764]	S3764	0.155717	Ank2
Q8C8R3	HSPGsPSTk.Q8C8R3	HSPGsPSTk	0.630075	0.00358436	0.0078165	Q8C8R3 1xPhospho [S1842]	S1842	0.155717	Ank2
Q8C8R3	EESsPR.Q8C8R3	EESsPR	0.383459	0.0960014	0.135915	Q8C8R3 1xPhospho [S3781]	S3781	0.155717	Ank2
Q8C8R3	HSPGsPSTkNER.Q8C8R3	HSPGsPSTkNER	0.572932	0.0094108	0.0180176	Q8C8R3 1xPhospho [S1842]	S1842	0.155717	Ank2
Q8C8R3	NERHsPVSSLk.Q8C8R3	NERHsPVSSLk	0.705263	0.000732211	0.0019849	Q8C8R3 1xPhospho [S1851]	S1851	0.155717	Ank2
Q8C8R3	HTPVsPSSk.Q8C8R3	HTPVsPSSk	0.678195	0.00136819	0.0033888	Q8C8R3 1xPhospho [S1807]	S1807	0.155717	Ank2
Q8C8R3	GSPIVQEPEEASEPkEESsPRk.Q8C8R3	GSPIVQEPEEASEPkEESsPRk	0.642105	0.00285961	0.00644507	Q8C8R3 1xPhospho [S3781]	S3781	0.155717	Ank2
Q8C8R3	VGtPTDIHSEk.Q8C8R3	VGtPTDIHSEk	0.433083	0.057859	0.0868253	Q8C8R3 1xPhospho [T2232]	T2232	0.155717	Ank2
Q8C8R3	TPIIktPEVVPSVAAEESHR.Q8C8R3	TPIIktPEVVPSVAAEESHR	0.129323	0.585637	0.644228	Q8C8R3 1xPhospho [T2059]	T2059	0.155717	Ank2
Q8C8R3	QDGSSSAsDPDADYSAEVNDEk.Q8C8R3	QDGSSSAsDPDADYSAEVNDEk	0.796992	3.33058e-05	0.00013773	Q8C8R3 1xPhospho [S2583]	S2583	0.155717	Ank2
Q8C8R3	TPTEEGtPTSEQNPFLFQEGk.Q8C8R3	TPTEEGtPTSEQNPFLFQEGk	0.77594	8.58336e-05	0.000319062	Q8C8R3 1xPhospho [T3050]	T3050	0.155717	Ank2
Q8C8R3	SDsLSTVk.Q8C8R3	SDsLSTVk	0.801504	2.60281e-05	0.00011095	Q8C8R3 1xPhospho [S3190]	S3190	0.155717	Ank2
Q8C8R3	GSEkIVDEQGDmDFQIsPDRk.Q8C8R3	GSEkIVDEQGDmDFQIsPDRk	-0.303759	0.19246	0.248142	Q8C8R3 1xPhospho [S2090]	S2090	0.155717	Ank2
Q8C8R3	TAEGTEPkPQGAIRsPQGLELPLPNR.Q8C8R3	TAEGTEPkPQGAIRsPQGLELPLPNR	0.721805	0.000480272	0.00137647	Q8C8R3 1xPhospho [S2364]	S2364	0.155717	Ank2
Q8C8R3	NERHsPVSSLkTER.Q8C8R3	NERHsPVSSLkTER	0.673684	0.00150847	0.00365544	Q8C8R3 1xPhospho [S1851]	S1851	0.155717	Ank2
Q8C8R3	ETTkVGtPTDIHSEk.Q8C8R3	ETTkVGtPTDIHSEk	0.655639	0.00219322	0.00510955	Q8C8R3 1xPhospho [T2232]	T2232	0.155717	Ank2
Q8C8R3	FtPEEEmFk.Q8C8R3	FtPEEEmFk	0.135338	0.568108	0.626116	Q8C8R3 1xPhospho [T2542]	T2542	0.155717	Ank2
Q8C8R3	IFGLmVDRQsQGTTPDTTPAR.Q8C8R3	IFGLmVDRQsQGTTPDTTPAR	0.666165	0.00176841	0.00423733	Q8C8R3 1xPhospho [S3032]	S3032	0.155717	Ank2
Q8C8R3	sYIETETESR.Q8C8R3	sYIETETESR	0.84812	0	0	Q8C8R3 1xPhospho [S3362]	S3362	0.155717	Ank2
Q8C8R3	HPPVsPGkTEk.Q8C8R3	HPPVsPGkTEk	0.711278	0.00063059	0.00173745	Q8C8R3 1xPhospho [S1889]	S1889	0.155717	Ank2
Q8C8R3	EIASPSsPVk.Q8C8R3	EIASPSsPVk	-0.398496	0.0828741	0.119634	Q8C8R3 1xPhospho [S2827]	S2827	0.155717	Ank2
Q8C8R3	HTPVsPSSkNEk.Q8C8R3	HTPVsPSSkNEk	0.66015	0.00200192	0.00471995	Q8C8R3 1xPhospho [S1807]	S1807	0.155717	Ank2
Q8C8R3	TERHsPVFSGkPEk.Q8C8R3	TERHsPVFSGkPEk	0.72782	0.000408267	0.00120685	Q8C8R3 1xPhospho [S1828]	S1828	0.155717	Ank2
Q8C8R3	IQTDTcHSTVVHsPEVYSVIIR.Q8C8R3	IQTDTcHSTVVHsPEVYSVIIR	-0.0556391	0.816412	0.845146	Q8C8R3 1xPhospho [S2913]	S2913	0.155717	Ank2
Q8C8R3	THPAVsPSSk.Q8C8R3	THPAVsPSSk	0.801504	2.60281e-05	0.00011095	Q8C8R3 1xPhospho [S1777]	S1777	0.155717	Ank2
Q8C8R3	IVDEQGDmDFQIsPDR.Q8C8R3	IVDEQGDmDFQIsPDR	0.473684	0.0364322	0.0588366	Q8C8R3 1xPhospho [S2090]	S2090	0.155717	Ank2
Q8C8R3	ARsYIETETESR.Q8C8R3	ARsYIETETESR	0.837594	0	0	Q8C8R3 1xPhospho [S3362]	S3362	0.155717	Ank2
Q8C8R3	HPPVsPGk.Q8C8R3	HPPVsPGk	0.242105	0.302355	0.365404	Q8C8R3 1xPhospho [S1889]	S1889	0.155717	Ank2
Q8C8R3	ATsPLIEETPIGsIkDk.Q8C8R3	ATsPLIEETPIGsIkDk	0.326316	0.160224	0.212878	Q8C8R3 2xPhospho [S1722; S1732]	S1722	0.155717	Ank2
Q8C8R3	HLPVsPGkTEk.Q8C8R3	HLPVsPGkTEk	0.315789	0.174755	0.228698	Q8C8R3 1xPhospho [S1925]	S1925	0.155717	Ank2
Q8C8R3	mTAILTTDVSDkAGsLk.Q8C8R3	mTAILTTDVSDkAGsLk	0	1	1	Q8C8R3 1xPhospho [S1498]	S1498	0.155717	Ank2
Q8C8R3	SsPEDVVVTNSSNR.Q8C8R3	SsPEDVVVTNSSNR	0.239098	0.308552	0.371748	Q8C8R3 1xPhospho [S2924]	S2924	0.155717	Ank2
Q8C996	RsPPGPGVPRPPPR.Q8C996	RsPPGPGVPRPPPR	-0.221053	0.347374	0.412606	Q8C996 1xPhospho [S11]	S11	0.121774	Tmem163
Q8C996	ISEsGQFSDGLEDR.Q8C996	ISEsGQFSDGLEDR	0.168421	0.476175	0.539451	Q8C996 1xPhospho [S56]	S56	0.121774	Tmem163
Q8CAA7	AVAGVmITAsHNR.Q8CAA7	AVAGVmITAsHNR	-0.279699	0.23148	0.290028	Q8CAA7 1xPhospho [S175]	S175	1.49863	Pgm2l1
Q8CBE3	TNsSEQER.Q8CBE3	TNsSEQER	0.36391	0.115314	0.158768	Q8CBE3 1xPhospho [S30]	S30	0.0975417	Wdr37
Q8CBW3	HNsTTSSTSSGGYR.Q8CBW3	HNsTTSSTSSGGYR	-0.338346	0.144689	0.194433	Q8CBW3 1xPhospho [S296]	S296	0.743013	Abi1
Q8CBW3	TNPPTQkPPsPPVSGR.Q8CBW3	TNPPTQkPPsPPVSGR	0.566917	0.0103238	0.0195273	Q8CBW3 1xPhospho [S183]	S183	0.743013	Abi1
Q8CBW3	TAsLNQRPR.Q8CBW3	TAsLNQRPR	-0.354887	0.125132	0.170786	Q8CBW3 1xPhospho [S231]	S231	0.743013	Abi1
Q8CC35	sPVLER.Q8CC35	sPVLER	0.642105	0.00285961	0.00644507	Q8CC35 1xPhospho [S535]	S535	3.03759	Synpo
Q8CC35	DRAsPAAAEEAVPEWAScLk.Q8CC35	DRAsPAAAEEAVPEWAScLk	0.526316	0.0185674	0.0323144	Q8CC35 1xPhospho [S672]	S672	3.03759	Synpo
Q8CC35	cPsPTmSLPSSWk.Q8CC35	cPsPTmSLPSSWk	-0.0285714	0.906366	0.919654	Q8CC35 1xPhospho [S740]	S740	3.03759	Synpo
Q8CC35	AGLPPsPALPRPSR.Q8CC35	AGLPPsPALPRPSR	0.0135338	0.956905	0.963457	Q8CC35 1xPhospho [S854]	S854	3.03759	Synpo
Q8CC35	VASLsPAR.Q8CC35	VASLsPAR	0.915789	3.36969e-06	2.35979e-05	Q8CC35 1xPhospho [S765]	S765	3.03759	Synpo
Q8CC35	LLGQRsPVLER.Q8CC35	LLGQRsPVLER	0.921805	4.04776e-06	2.66044e-05	Q8CC35 1xPhospho [S535]	S535	3.03759	Synpo
Q8CC35	HLEkVAsEEEEVPLVVYLk.Q8CC35	HLEkVAsEEEEVPLVVYLk	0.475188	0.0357808	0.0579039	Q8CC35 1xPhospho [S258]	S258	3.03759	Synpo
Q8CCJ4	RPDsPGQDASR.Q8CCJ4	RPDsPGQDASR	0.930827	4.91748e-06	2.99762e-05	Q8CCJ4 1xPhospho [S244]	S244	-2.23967	Amer2
Q8CCN5	EGsIETLSNSSGSTSGSIPR.Q8CCN5	EGsIETLSNSSGSTSGSIPR	0.0195489	0.936659	0.946718	Q8CCN5 1xPhospho [S886]	S886	1.33004	Bcas3
Q8CCN5	VksPPQISPSk.Q8CCN5	VksPPQISPSk	0.377444	0.101666	0.142393	Q8CCN5 1xPhospho [S565]	S565	1.33004	Bcas3
Q8CCN5	LADAmAEsPSRDVVGSGTELQR.Q8CCN5	LADAmAEsPSRDVVGSGTELQR	0.83609	0	0	Q8CCN5 1xPhospho [S869]	S869	1.33004	Bcas3
Q8CDA1	SQsASSIDVSTHAPSEAAAGPGSELGk.Q8CDA1	SQsASSIDVSTHAPSEAAAGPGSELGk	0.607519	0.00535194	0.0111542	Q8CDA1 1xPhospho [S908]	S908	-0.887094	Inpp5f
Q8CDA1	VQksPAEPEAVNEIQQNELk.Q8CDA1	VQksPAEPEAVNEIQQNELk	0.757895	0.000164795	0.000552367	Q8CDA1 1xPhospho [S1103]	S1103	-0.887094	Inpp5f
Q8CDA1	AVsPFAk.Q8CDA1	AVsPFAk	0.688722	0.00108201	0.00278858	Q8CDA1 1xPhospho [S1069]	S1069	-0.887094	Inpp5f
Q8CFI0	SLsSPTVTLSAPLEGAk.Q8CFI0	SLsSPTVTLSAPLEGAk	0.336842	0.146569	0.196735	Q8CFI0 1xPhospho [S477]	S477	-0.233728	Nedd4l
Q8CFI0	TsPQELSEEVSR.Q8CFI0	TsPQELSEEVSR	0.0857143	0.71911	0.765987	Q8CFI0 1xPhospho [S332]	S332	-0.233728	Nedd4l
Q8CGF6	RPQsADAYmTR.Q8CGF6	RPQsADAYmTR	0.314286	0.176904	0.231252	Q8CGF6 1xPhospho [S304]	S304	-0.791849	Wdr47
Q8CH09	sLNIADQEGTLLGk.Q8CH09	sLNIADQEGTLLGk	0.645113	0.00269874	0.0061592	Q8CH09 1xPhospho [S206]	S206	-1.03073	Sugp2
Q8CH25	DVQDAIAQsPEk.Q8CH25	DVQDAIAQsPEk	0.765414	0.000127184	0.000444012	Q8CH25 1xPhospho [S289]	S289	-1.81832	Sltm
Q8CH25	DVQDAIAQsPEkEAk.Q8CH25	DVQDAIAQsPEkEAk	0.43609	0.0559975	0.0843008	Q8CH25 1xPhospho [S289]	S289	-1.81832	Sltm
Q8CH77	sLPRPAk.Q8CH77	sLPRPAk	0.833083	0	0	Q8CH77 1xPhospho [S675]	S675	-1.64253	Nav1
Q8CH77	AVALDSDNIsLk.Q8CH77	AVALDSDNIsLk	0.55188	0.0129274	0.0236717	Q8CH77 1xPhospho [S756]	S756	-1.64253	Nav1
Q8CH77	YGQSsPR.Q8CH77	YGQSsPR	0.833083	0	0	Q8CH77 1xPhospho [S325]	S325	-1.64253	Nav1
Q8CH77	kLEYDSGsLkmEPGTSk.Q8CH77	kLEYDSGsLkmEPGTSk	0.637594	0.00311567	0.00694899	Q8CH77 1xPhospho [S493]	S493	-1.64253	Nav1
Q8CH77	sLTNLSFLTDSEk.Q8CH77	sLTNLSFLTDSEk	0.747368	0.000231131	0.000748075	Q8CH77 1xPhospho [S93]	S93	-1.64253	Nav1
Q8CH77	SGYmsDSDLmGk.Q8CH77	SGYmsDSDLmGk	0.75188	0.000200571	0.000660059	Q8CH77 1xPhospho [S394]	S394	-1.64253	Nav1
Q8CH77	DRNtLPk.Q8CH77	DRNtLPk	0.583459	0.00797257	0.0156069	Q8CH77 1xPhospho [T940]	T940	-1.64253	Nav1
Q8CH77	SNIQYRsLPRPAk.Q8CH77	SNIQYRsLPRPAk	0.712782	0.000607059	0.00168643	Q8CH77 1xPhospho [S675]	S675	-1.64253	Nav1
Q8CH77	GQLTNIVsPTAATTPR.Q8CH77	GQLTNIVsPTAATTPR	0.867669	0	0	Q8CH77 1xPhospho [S998]	S998	-1.64253	Nav1
Q8CH77	YQLQsQEETkER.Q8CH77	YQLQsQEETkER	0.700752	0.00081682	0.00217418	Q8CH77 1xPhospho [S952]	S952	-1.64253	Nav1
Q8CH77	ERPEscDDASkGGELk.Q8CH77	ERPEscDDASkGGELk	0.652632	0.00232893	0.0054043	Q8CH77 1xPhospho [S510]	S510	-1.64253	Nav1
Q8CH77	kTsLDVSNSVEPGFLAPGAR.Q8CH77	kTsLDVSNSVEPGFLAPGAR	0.875188	0	0	Q8CH77 1xPhospho [S651]	S651	-1.64253	Nav1
Q8CH77	TLSksEHSLFQPk.Q8CH77	TLSksEHSLFQPk	0.759398	0.000156672	0.000529667	Q8CH77 1xPhospho [S145]	S145	-1.64253	Nav1
Q8CH77	VNSNsLDLPSSSDTHASk.Q8CH77	VNSNsLDLPSSSDTHASk	0.196992	0.403442	0.468789	Q8CH77 1xPhospho [S810]	S810	-1.64253	Nav1
Q8CH77	SVQPEVELSGGSGsGGDEGADESR.Q8CH77	SVQPEVELSGGSGsGGDEGADESR	0.604511	0.00563412	0.0116494	Q8CH77 1xPhospho [S21]	S21	-1.64253	Nav1
Q8CH77	SGsVDSR.Q8CH77	SGsVDSR	0.8	2.83262e-05	0.000119877	Q8CH77 1xPhospho [S74]	S74	-1.64253	Nav1
Q8CH77	SASSYSDIEEIATPDSSAPSsPkLQHGSTETASPSIk.Q8CH77	SASSYSDIEEIATPDSSAPSsPkLQHGSTETASPSIk	0.736842	0.000316639	0.000981622	Q8CH77 1xPhospho [S1251]	S1251	-1.64253	Nav1
Q8CH77	TDsEkR.Q8CH77	TDsEkR	0.810526	1.46396e-05	6.80768e-05	Q8CH77 1xPhospho [S463]	S463	-1.64253	Nav1
Q8CH77	SIGsPESTPk.Q8CH77	SIGsPESTPk	0.897744	9.64874e-07	8.66545e-06	Q8CH77 1xPhospho [S762]	S762	-1.64253	Nav1
Q8CH77	sSTIVLR.Q8CH77	sSTIVLR	0.569925	0.00985866	0.0187833	Q8CH77 1xPhospho [S454]	S454	-1.64253	Nav1
Q8CHC4	EIEAPksPGTARk.Q8CHC4	EIEAPksPGTARk	0.294737	0.206522	0.263386	Q8CHC4 1xPhospho [S1160]	S1160	2.31917	Synj1
Q8CHC4	SAEDLDLLNAsFQDESk.Q8CHC4	SAEDLDLLNAsFQDESk	0.497744	0.0270715	0.0450171	Q8CHC4 1xPhospho [S830]	S830	2.31917	Synj1
Q8CHC4	EIEAPksPGTAR.Q8CHC4	EIEAPksPGTAR	0.887218	0	0	Q8CHC4 1xPhospho [S1160]	S1160	2.31917	Synj1
Q8CHC4	EFGGVGAPPsPGVARR.Q8CHC4	EFGGVGAPPsPGVARR	-0.222556	0.344032	0.409256	Q8CHC4 1xPhospho [S1147]	S1147	2.31917	Synj1
Q8CHC4	EFGGVGAPPsPGVAR.Q8CHC4	EFGGVGAPPsPGVAR	0.62406	0.00399988	0.00858734	Q8CHC4 1xPhospho [S1147]	S1147	2.31917	Synj1
Q8CHC4	REIEAPksPGTAR.Q8CHC4	REIEAPksPGTAR	0.890226	0	0	Q8CHC4 1xPhospho [S1160]	S1160	2.31917	Synj1
Q8CHC4	TPGPPSSQGsPVDTQPAAQk.Q8CHC4	TPGPPSSQGsPVDTQPAAQk	0.911278	2.81457e-06	2.10244e-05	Q8CHC4 1xPhospho [S1084]	S1084	2.31917	Synj1
Q8CHG7	SSIVSNSsFDSVPVSLHDERR.Q8CHG7	SSIVSNSsFDSVPVSLHDERR	0.765414	0.000127184	0.000444012	Q8CHG7 1xPhospho [S1158]	S1158	1.68512	Rapgef2
Q8CHG7	kILsLSEEGSLER.Q8CHG7	kILsLSEEGSLER	0.849624	0	0	Q8CHG7 1xPhospho [S1088]	S1088	1.68512	Rapgef2
Q8CHG7	SETsPVAPR.Q8CHG7	SETsPVAPR	0.550376	0.0132148	0.0240855	Q8CHG7 1xPhospho [S1022]	S1022	1.68512	Rapgef2
Q8CHG7	NPGDkkPVkSETsPVAPR.Q8CHG7	NPGDkkPVkSETsPVAPR	0.18797	0.425705	0.490541	Q8CHG7 1xPhospho [S1022]	S1022	1.68512	Rapgef2
Q8CHG7	SsFLNAk.Q8CHG7	SsFLNAk	0.833083	0	0	Q8CHG7 1xPhospho [S960]	S960	1.68512	Rapgef2
Q8CHT1	FVsFTSR.Q8CHT1	FVsFTSR	0.640602	0.00294296	0.00662024	Q8CHT1 1xPhospho [S606]	S606	0.2272	Ngef
Q8CHT1	mEDPQRsQNkDR.Q8CHT1	mEDPQRsQNkDR	-0.136842	0.563763	0.623665	Q8CHT1 1xPhospho [S696]	S696	0.2272	Ngef
Q8CHT1	TkFVsFTSR.Q8CHT1	TkFVsFTSR	0.276692	0.236703	0.295627	Q8CHT1 1xPhospho [S606]	S606	0.2272	Ngef
Q8CI08	sLPNLSR.Q8CI08	sLPNLSR	0.920301	3.8853e-06	2.58983e-05	Q8CI08 1xPhospho [S414]	S414	-3.23681	Slain2
Q8CI51	RGsQGDIk.Q8CI51	RGsQGDIk	0.0390977	0.871187	0.889715	Q8CI51 1xPhospho [S228]	S228	-0.889145	Pdlim5
Q8CI71	SVsRETLk.Q8CI71	SVsRETLk	0.869173	0	0	Q8CI71 1xPhospho [S585]	S585	0.717912	Vps50
Q8CI75	LNLRsPGTPR.Q8CI75	LNLRsPGTPR	0.709774	0.000654853	0.00179171	Q8CI75 1xPhospho [S12]	S12	-0.725848	Dis3l2
Q8CIP4	RsPTSTGDTELkEER.Q8CIP4	RsPTSTGDTELkEER	0.769925	0.000107978	0.00038613	Q8CIP4 1xPhospho [S438]	S438	-0.25533	Mark4
Q8CIQ7	kAsLPPGSVkEEQAR.Q8CIQ7	kAsLPPGSVkEEQAR	-0.177444	0.452508	0.516619	Q8CIQ7 1xPhospho [S2005]	S2005	0.021773	Dock3
Q8CIQ7	GNVLASHSPmsPENIk.Q8CIQ7	GNVLASHSPmsPENIk	-0.0210526	0.931603	0.942417	Q8CIQ7 1xPhospho [S1655]	S1655	0.021773	Dock3
Q8CJ19	TtPkLTR.Q8CJ19	TtPkLTR	-0.536842	0.0160432	0.0285119	Q8CJ19 1xPhospho [T509]	T509	0.272176	Mical3
Q8CJ19	RQLsFSEDSDLSSDDILER.Q8CJ19	RQLsFSEDSDLSSDDILER	-0.00601504	0.982248	0.985599	Q8CJ19 1xPhospho [S1783]	S1783	0.272176	Mical3
Q8CJ19	ELGSESTRHPsLR.Q8CJ19	ELGSESTRHPsLR	0.502256	0.0255532	0.0429783	Q8CJ19 1xPhospho [S1645]	S1645	0.272176	Mical3
Q8CJ19	VksPEEPLFPTPLLLR.Q8CJ19	VksPEEPLFPTPLLLR	0.586466	0.00759661	0.0149455	Q8CJ19 1xPhospho [S1187]	S1187	0.272176	Mical3
Q8CJ19	sPSDkELR.Q8CJ19	sPSDkELR	0.62406	0.00399988	0.00858734	Q8CJ19 1xPhospho [S1404]	S1404	0.272176	Mical3
Q8CJ19	QEERGTsQVsSPSQPPEk.Q8CJ19	QEERGTsQVsSPSQPPEk	0.335338	0.148467	0.198943	Q8CJ19 2xPhospho [S1150; S1153]	S1150	0.272176	Mical3
Q8CJ19	GRsEEELEASk.Q8CJ19	GRsEEELEASk	0.709774	0.000654853	0.00179171	Q8CJ19 1xPhospho [S977]	S977	0.272176	Mical3
Q8CJ19	AVLsPIR.Q8CJ19	AVLsPIR	0.675188	0.00146046	0.00355741	Q8CJ19 1xPhospho [S1216]	S1216	0.272176	Mical3
Q8JZP2	SQsLTNSLSTSDTSHR.Q8JZP2	SQsLTNSLSTSDTSHR	0.675188	0.00146046	0.00355741	Q8JZP2 1xPhospho [S540]	S540	-0.637095	Syn3
Q8JZP2	SPGsPQLSR.Q8JZP2	SPGsPQLSR	0.81203	1.31022e-05	6.26616e-05	Q8JZP2 1xPhospho [S483]	S483	-0.637095	Syn3
Q8JZP2	SPSQQRLsPQGQQPVSPQSGSPQQQR.Q8JZP2	SPSQQRLsPQGQQPVSPQSGSPQQQR	-0.0150376	0.951841	0.959589	Q8JZP2 1xPhospho [S461]	S461	-0.637095	Syn3
Q8JZP2	LSPQGQQPVsPQSGSPQQQR.Q8JZP2	LSPQGQQPVsPQSGSPQQQR	0.350376	0.130263	0.17707	Q8JZP2 1xPhospho [S469]	S469	-0.637095	Syn3
Q8JZW4	AQGIRPRPPPAAPAQsPPQsPAHSPPGSPVHTHI.Q8JZW4	AQGIRPRPPPAAPAQsPPQsPAHSPPGSPVHTHI	0.499248	0.0265576	0.0442877	Q8JZW4 2xPhospho [S575; S579]	S575	-0.483159	Cpne5
Q8JZX4	RPDPDsDEDEDYERER.Q8JZX4	RPDPDsDEDEDYERER	0.697744	0.000877514	0.00233046	Q8JZX4 1xPhospho [S155]	S155	-1.91791	Rbm17
Q8JZZ7	EGQmQLVTsL.Q8JZZ7	EGQmQLVTsL	0.771429	0.000102087	0.000367856	Q8JZZ7 1xPhospho [S1486]	S1486	-0.922081	Adgrl2
Q8K004	sVDAYDSYWESR.Q8K004	sVDAYDSYWESR	0.159398	0.500462	0.562631	Q8K004 1xPhospho [S247]	S247	0.43804	Spata2
Q8K012	RHsSDINHLVTQGR.Q8K012	RHsSDINHLVTQGR	0	1	1	Q8K012 1xPhospho [S488]	S488	-0.295067	Fnbp1l
Q8K012	TIsDGTISAAk.Q8K012	TIsDGTISAAk	0.192481	0.414491	0.480205	Q8K012 1xPhospho [S295]	S295	-0.295067	Fnbp1l
Q8K0D0	RAsLSEIGFGk.Q8K0D0	RAsLSEIGFGk	0.43609	0.0559975	0.0843008	Q8K0D0 1xPhospho [S180]	S180	0.0463315	Cdk17
Q8K0T0	REQDsPPmkPGALDAIR.Q8K0T0	REQDsPPmkPGALDAIR	0.649624	0.00247148	0.00567355	Q8K0T0 1xPhospho [S487]	S487	1.27643	Rtn1
Q8K0T0	SPPVAmETASTGmAAVPDALDHsPSSTLk.Q8K0T0	SPPVAmETASTGmAAVPDALDHsPSSTLk	-0.0150376	0.951841	0.959589	Q8K0T0 1xPhospho [S92]	S92	1.27643	Rtn1
Q8K0T0	GSVsEDELIAAIk.Q8K0T0	GSVsEDELIAAIk	0.846617	0	0	Q8K0T0 1xPhospho [S352]	S352	1.27643	Rtn1
Q8K1M6	SkPIPImPAsPQk.Q8K1M6	SkPIPImPAsPQk	-0.168421	0.476175	0.539451	Q8K1M6 1xPhospho [S622]	S622	0.960436	Dnm1l
Q8K212	QLskPLSER.Q8K212	QLskPLSER	0.512782	0.0222752	0.0381745	Q8K212 1xPhospho [S517]	S517	0.520088	Pacs1
Q8K212	ADLQGSAsPSkVEGTHTPR.Q8K212	ADLQGSAsPSkVEGTHTPR	-0.377444	0.101666	0.142393	Q8K212 1xPhospho [S493]	S493	0.520088	Pacs1
Q8K212	LkPFFEGmSQSsSQTEIGSLNSk.Q8K212	LkPFFEGmSQSsSQTEIGSLNSk	-0.142857	0.546535	0.606602	Q8K212 1xPhospho [S408]	S408	0.520088	Pacs1
Q8K2K6	GTPSQsPVVGR.Q8K2K6	GTPSQsPVVGR	-0.183459	0.437084	0.501443	Q8K2K6 1xPhospho [S181]	S181	0.117819	Agfg1
Q8K310	RDsFDDRGPSLNPVLDYDHGSR.Q8K310	RDsFDDRGPSLNPVLDYDHGSR	0.55188	0.0129274	0.0236717	Q8K310 1xPhospho [S188]	S188	-2.01688	Matr3
Q8K310	RRRtEEGPTLSYGR.Q8K310	RRRtEEGPTLSYGR	0.213534	0.364372	0.431271	Q8K310 1xPhospho [T150]	T150	-2.01688	Matr3
Q8K310	RDsFDDR.Q8K310	RDsFDDR	0.372932	0.106075	0.148039	Q8K310 1xPhospho [S188]	S188	-2.01688	Matr3
Q8K310	RRtEEGPTLSYGR.Q8K310	RRtEEGPTLSYGR	-0.227068	0.334123	0.398072	Q8K310 1xPhospho [T150]	T150	-2.01688	Matr3
Q8K341	LLLATDPGGsPAQR.Q8K341	LLLATDPGGsPAQR	0.912782	3.00375e-06	2.15301e-05	Q8K341 1xPhospho [S315]	S315	-2.59361	Atat1
Q8K382	sLEDLRAPk.Q8K382	sLEDLRAPk	0.133835	0.572468	0.630331	Q8K382 1xPhospho [S592]	S592	0.546229	Dennd1a
Q8K382	TmPsPQAETQDPR.Q8K382	TmPsPQAETQDPR	0.0571429	0.81147	0.842625	Q8K382 1xPhospho [S473]	S473	0.546229	Dennd1a
Q8K394	TsPGRGPLGVALAR.Q8K394	TsPGRGPLGVALAR	-0.279699	0.23148	0.290028	Q8K394 1xPhospho [S72]	S72	0.737907	Plcl2
Q8K394	kLSSNcSGVEGDVtDEDEGAEmSQR.Q8K394	kLSSNcSGVEGDVtDEDEGAEmSQR	0.682707	0.00123879	0.00311087	Q8K394 1xPhospho [T585]	T585	0.737907	Plcl2
Q8K394	sLEAIPEk.Q8K394	sLEAIPEk	0.458647	0.0434755	0.0678817	Q8K394 1xPhospho [S1114]	S1114	0.737907	Plcl2
Q8K3I4	SGSAEAAPRsPkDR.Q8K3I4	SGSAEAAPRsPkDR	0.905263	2.02107e-06	1.60121e-05	Q8K3I4 1xPhospho [S317]	S317	1.56577	Myrip
Q8K3I4	SQSGsVk.Q8K3I4	SQSGsVk	0.884211	0	0	Q8K3I4 1xPhospho [S270]	S270	1.56577	Myrip
Q8K400	REPRsPR.Q8K400	REPRsPR	0.596992	0.00639357	0.0129914	Q8K400 1xPhospho [S685]	S685	0.892772	Stxbp5
Q8K400	EPRsPR.Q8K400	EPRsPR	0.646617	0.00262115	0.00598793	Q8K400 1xPhospho [S685]	S685	0.892772	Stxbp5
Q8K400	RRPVSVsPSSSQEISENQYAVIcSEk.Q8K400	RRPVSVsPSSSQEISENQYAVIcSEk	0.469173	0.0384427	0.0614509	Q8K400 1xPhospho [S903]	S903	0.892772	Stxbp5
Q8K400	QPsGAGLcDITEGTVVPEDR.Q8K400	QPsGAGLcDITEGTVVPEDR	-0.294737	0.206522	0.263386	Q8K400 1xPhospho [S693]	S693	0.892772	Stxbp5
Q8K400	RPVSVsPSSSQEISENQYAVIcSEk.Q8K400	RPVSVsPSSSQEISENQYAVIcSEk	0.12782	0.590056	0.64818	Q8K400 1xPhospho [S903]	S903	0.892772	Stxbp5
Q8K4B0	SSGsPk.Q8K4B0	SSGsPk	0.735338	0.00033065	0.00101304	Q8K4B0 1xPhospho [S460]	S460	-2.39256	Mta1
Q8K4G5	RsSGREEDEEELLR.Q8K4G5	RsSGREEDEEELLR	0.62406	0.00399988	0.00858734	Q8K4G5 1xPhospho [S670]	S670	-0.712364	Ablim1
Q8K4G5	TSsLPGYGk.Q8K4G5	TSsLPGYGk	0.878195	0	0	Q8K4G5 1xPhospho [S738]	S738	-0.712364	Ablim1
Q8K4P8	FsSVDSAk.Q8K4P8	FsSVDSAk	0.0285714	0.906366	0.919654	Q8K4P8 1xPhospho [S717]	S717	-0.96187	Hecw1
Q8K4P8	STsDTDLVTSDSR.Q8K4P8	STsDTDLVTSDSR	0.76391	0.000134123	0.000461392	Q8K4P8 1xPhospho [S68]	S68	-0.96187	Hecw1
Q8K4P8	EGSLsPVNSQk.Q8K4P8	EGSLsPVNSQk	0.679699	0.00132389	0.00329641	Q8K4P8 1xPhospho [S937]	S937	-0.96187	Hecw1
Q8K596	GIsALLLNQGNGDk.Q8K596	GIsALLLNQGNGDk	-0.427068	0.0617253	0.0918076	Q8K596 1xPhospho [S622]	S622	2.18785	Slc8a2
Q8R001	SSPASkPGSTPSRPSsAkR.Q8R001	SSPASkPGSTPSRPSsAkR	0.809023	1.62733e-05	7.46413e-05	Q8R001 1xPhospho [S222]	S222	-0.36678	Mapre2
Q8R0A7	TVTmIsPEDEQkGEk.Q8R0A7	TVTmIsPEDEQkGEk	0.893233	3.11792e-07	3.00675e-06	Q8R0A7 1xPhospho [S275]	S275	2.99479	Kiaa0513
Q8R0S2	mQFsFEGPEk.Q8R0S2	mQFsFEGPEk	0.831579	2.99428e-07	2.96031e-06	Q8R0S2 1xPhospho [S179]	S179	2.03368	Iqsec1
Q8R0S2	SALSSsLRDLSEAGkR.Q8R0S2	SALSSsLRDLSEAGkR	0.571429	0.0096326	0.0183824	Q8R0S2 1xPhospho [S923]	S923	2.03368	Iqsec1
Q8R0S2	SDRSsLkR.Q8R0S2	SDRSsLkR	0.861654	0	0	Q8R0S2 1xPhospho [S398]	S398	2.03368	Iqsec1
Q8R0S2	ETRNsWDSPAFSNDVIR.Q8R0S2	ETRNsWDSPAFSNDVIR	0.936842	5.39341e-06	3.15689e-05	Q8R0S2 1xPhospho [S510]	S510	2.03368	Iqsec1
Q8R0S2	LQHStSVLR.Q8R0S2	LQHStSVLR	0.157895	0.504569	0.566166	Q8R0S2 1xPhospho [T87]	T87	2.03368	Iqsec1
Q8R0S2	STPsLERPEPR.Q8R0S2	STPsLERPEPR	0.888722	0	0	Q8R0S2 1xPhospho [S362]	S362	2.03368	Iqsec1
Q8R0S2	SLGGQQGsPk.Q8R0S2	SLGGQQGsPk	0.809023	1.62733e-05	7.46413e-05	Q8R0S2 1xPhospho [S415]	S415	2.03368	Iqsec1
Q8R0S2	NSWDsPAFSNDVIR.Q8R0S2	NSWDsPAFSNDVIR	-0.750376	0.000210385	0.000690427	Q8R0S2 1xPhospho [S513]	S513	2.03368	Iqsec1
Q8R0S2	SLAEsIDDALNcR.Q8R0S2	SLAEsIDDALNcR	0.745865	0.000242084	0.000774997	Q8R0S2 1xPhospho [S251]	S251	2.03368	Iqsec1
Q8R105	LALEsPEVQDLQLER.Q8R105	LALEsPEVQDLQLER	0.523308	0.0193447	0.0335185	Q8R105 1xPhospho [S29]	S29	0.264325	Vps37c
Q8R1A4	SmsIDDTPR.Q8R1A4	SmsIDDTPR	0.870677	0	0	Q8R1A4 1xPhospho [S182]	S182	-1.33247	Dock7
Q8R1Q8	DFQEYVEPGEDFPAsPQRR.Q8R1Q8	DFQEYVEPGEDFPAsPQRR	0.344361	0.137339	0.185511	Q8R1Q8 1xPhospho [S207]	S207	-0.0673559	Dync1li1
Q8R1Q8	LIRDFQEYVEPGEDFPAsPQRR.Q8R1Q8	LIRDFQEYVEPGEDFPAsPQRR	-0.195489	0.407106	0.472814	Q8R1Q8 1xPhospho [S207]	S207	-0.0673559	Dync1li1
Q8R1Q8	DFQEYVEPGEDFPAsPQR.Q8R1Q8	DFQEYVEPGEDFPAsPQR	0.321805	0.166343	0.219398	Q8R1Q8 1xPhospho [S207]	S207	-0.0673559	Dync1li1
Q8R1Q8	VPGGsPR.Q8R1Q8	VPGGsPR	-0.0150376	0.951841	0.959589	Q8R1Q8 1xPhospho [S405]	S405	-0.0673559	Dync1li1
Q8R1R3	ATAPsPERk.Q8R1R3	ATAPsPERk	0.535338	0.0163857	0.0289891	Q8R1R3 1xPhospho [S356]	S356	-0.844012	Stard7
Q8R361	RTYsDEASQLR.Q8R361	RTYsDEASQLR	0.427068	0.0617253	0.0918076	Q8R361 1xPhospho [S307]	S307	0.587633	Rab11fip5
Q8R3Q2	RVGTEGLVDsFSQGLER.Q8R3Q2	RVGTEGLVDsFSQGLER	-0.0691729	0.772202	0.810434	Q8R3Q2 1xPhospho [S289]	S289	0.0788485	Ppp6r2
Q8R3Q2	NVPGLAAPSsPTQk.Q8R3Q2	NVPGLAAPSsPTQk	0.281203	0.228898	0.287099	Q8R3Q2 1xPhospho [S670]	S670	0.0788485	Ppp6r2
Q8R3Z5	QGsWEDEEDYEEEmTDNR.Q8R3Z5	QGsWEDEEDYEEEmTDNR	-0.0360902	0.881217	0.899177	Q8R3Z5 1xPhospho [S547]	S547	-0.0383572	Cacnb1
Q8R3Z5	RPtPPASAk.Q8R3Z5	RPtPPASAk	-0.144361	0.542267	0.603573	Q8R3Z5 1xPhospho [T205]	T205	-0.0383572	Cacnb1
Q8R3Z5	NSAYTEPGDScVDmETDPSEGPGPGDPAGGGtPPAR.Q8R3Z5	NSAYTEPGDScVDmETDPSEGPGPGDPAGGGtPPAR	-0.108271	0.648757	0.6996	Q8R3Z5 1xPhospho [T540]	T540	-0.0383572	Cacnb1
Q8R4H2	EGILsPSELRk.Q8R4H2	EGILsPSELRk	-0.177444	0.452508	0.516619	Q8R4H2 1xPhospho [S824]	S824	-0.989113	Arhgef12
Q8R4H2	ITsPVLVGEENNVVHNQk.Q8R4H2	ITsPVLVGEENNVVHNQk	0.628571	0.00368474	0.00799833	Q8R4H2 1xPhospho [S190]	S190	-0.989113	Arhgef12
Q8R554	AAGGAAsPGPGGGAR.Q8R554	AAGGAAsPGPGGGAR	0.643609	0.00277821	0.00632218	Q8R554 1xPhospho [S749]	S749	1.36332	Otud7a
Q8R554	AAPGTGGPTPGRsPPAPAR.Q8R554	AAPGTGGPTPGRsPPAPAR	0.6	0.00608027	0.01243	Q8R554 1xPhospho [S771]	S771	1.36332	Otud7a
Q8R554	GIsHASSAIVSLAR.Q8R554	GIsHASSAIVSLAR	0.675188	0.00146046	0.00355741	Q8R554 1xPhospho [S121]	S121	1.36332	Otud7a
Q8R5H1	GPSTPksPGASNFSTLPk.Q8R5H1	GPSTPksPGASNFSTLPk	0.545865	0.0141083	0.0254577	Q8R5H1 1xPhospho [S229]	S229	0.569924	Usp15
Q8VBT0	VEEEQEADEEDVsEEEAEDREGASk.Q8VBT0	VEEEQEADEEDVsEEEAEDREGASk	0.198496	0.399796	0.465242	Q8VBT0 1xPhospho [S245]	S245	-1.05295	Tmx1
Q8VBT0	ATSQSsIR.Q8VBT0	ATSQSsIR	0.550376	0.0132148	0.0240855	Q8VBT0 1xPhospho [S263]	S263	-1.05295	Tmx1
Q8VBT0	VEEEQEADEEDVsEEEAEDR.Q8VBT0	VEEEQEADEEDVsEEEAEDR	0.678195	0.00136819	0.0033888	Q8VBT0 1xPhospho [S245]	S245	-1.05295	Tmx1
Q8VBY2	SmsAPGSLLmk.Q8VBY2	SmsAPGSLLmk	0.390977	0.0892565	0.127517	Q8VBY2 1xPhospho [S475]	S475	0.805455	Camkk1
Q8VD37	ASIGNIALsPSPVRk.Q8VD37	ASIGNIALsPSPVRk	0.58797	0.00741417	0.0146724	Q8VD37 1xPhospho [S149]	S149	2.79633	Sgip1
Q8VD37	HVPsPLNLEEVQkk.Q8VD37	HVPsPLNLEEVQkk	0.864662	0	0	Q8VD37 1xPhospho [S371]	S371	2.79633	Sgip1
Q8VD37	TGsPLTVATGNDQAATEAk.Q8VD37	TGsPLTVATGNDQAATEAk	0.947368	6.02399e-06	3.32734e-05	Q8VD37 1xPhospho [S265]	S265	2.79633	Sgip1
Q8VD37	STPtPELTSk.Q8VD37	STPtPELTSk	0.807519	1.80072e-05	8.10153e-05	Q8VD37 1xPhospho [T182]	T182	2.79633	Sgip1
Q8VD37	RNLsSEEVARPR.Q8VD37	RNLsSEEVARPR	0.702256	0.00078778	0.00211603	Q8VD37 1xPhospho [S169]	S169	2.79633	Sgip1
Q8VD37	ASIGNIALsPSPVR.Q8VD37	ASIGNIALsPSPVR	0.726316	0.000425399	0.00124498	Q8VD37 1xPhospho [S149]	S149	2.79633	Sgip1
Q8VD37	TVPAtPPR.Q8VD37	TVPAtPPR	0.846617	0	0	Q8VD37 1xPhospho [T259]	T259	2.79633	Sgip1
Q8VDD5	kGTGDcsDEEVDGkADGADAk.Q8VDD5	kGTGDcsDEEVDGkADGADAk	0.893233	3.11792e-07	3.00675e-06	Q8VDD5 1xPhospho [S1943]	S1943	1.36002	Myh9
Q8VDJ3	ETDPGsPR.Q8VDJ3	ETDPGsPR	0.491729	0.0292073	0.0482617	Q8VDJ3 1xPhospho [S944]	S944	-0.445089	Hdlbp
Q8VDZ4	HPSYRsEPsLEPESFRSPTFGk.Q8VDZ4	HPSYRsEPsLEPESFRSPTFGk	0.899248	1.18028e-06	1.0286e-05	Q8VDZ4 2xPhospho [S398; S401]	S398	1.61352	Zdhhc5
Q8VDZ4	YRPGYSSSSTSAAmPHSSsAk.Q8VDZ4	YRPGYSSSSTSAAmPHSSsAk	0.890226	0	0	Q8VDZ4 1xPhospho [S372]	S372	1.61352	Zdhhc5
Q8VDZ4	LLPTGPPHREPsPVRYDNLSR.Q8VDZ4	LLPTGPPHREPsPVRYDNLSR	0.589474	0.00723535	0.0143912	Q8VDZ4 1xPhospho [S529]	S529	1.61352	Zdhhc5
Q8VDZ4	LLPTGPPHREPsPVR.Q8VDZ4	LLPTGPPHREPsPVR	0.231579	0.324388	0.387454	Q8VDZ4 1xPhospho [S529]	S529	1.61352	Zdhhc5
Q8VDZ4	GLGsPEPGTTAPYLGR.Q8VDZ4	GLGsPEPGTTAPYLGR	0.296241	0.204132	0.261044	Q8VDZ4 1xPhospho [S621]	S621	1.61352	Zdhhc5
Q8VDZ4	LSRGDsLkEPTSIADSSR.Q8VDZ4	LSRGDsLkEPTSIADSSR	0.792481	4.18073e-05	0.000169901	Q8VDZ4 1xPhospho [S380]	S380	1.61352	Zdhhc5
Q8VEK3	AksPQPPVEEEDEHFDDTVVcLDTYNcDLHFk.Q8VEK3	AksPQPPVEEEDEHFDDTVVcLDTYNcDLHFk	0.736842	0.000316639	0.000981622	Q8VEK3 1xPhospho [S247]	S247	-1.4624	Hnrnpu
Q8VEK3	RLsDkGLk.Q8VEK3	RLsDkGLk	-0.183459	0.437084	0.501443	Q8VEK3 1xPhospho [S26]	S26	-1.4624	Hnrnpu
Q8VEK3	LQAALDNEAGGRPAmEPGNGsLDLGGDAAGR.Q8VEK3	LQAALDNEAGGRPAmEPGNGsLDLGGDAAGR	0.676692	0.00141371	0.00347592	Q8VEK3 1xPhospho [S58]	S58	-1.4624	Hnrnpu
Q8VH51	DksPVREPIDNLTPEER.Q8VH51	DksPVREPIDNLTPEER	0.530827	0.0174489	0.0305941	Q8VH51 1xPhospho [S136]	S136	-1.54726	Rbm39
Q8VH51	DksPVREPIDNLTPEERDAR.Q8VH51	DksPVREPIDNLTPEERDAR	0.676692	0.00141371	0.00347592	Q8VH51 1xPhospho [S136]	S136	-1.54726	Rbm39
Q8VH51	YRsPYSGPk.Q8VH51	YRsPYSGPk	0.703759	0.000759583	0.00205437	Q8VH51 1xPhospho [S97]	S97	-1.54726	Rbm39
Q8VHH5	LEPPPsPHSNR.Q8VHH5	LEPPPsPHSNR	0.249624	0.287203	0.349426	Q8VHH5 1xPhospho [S573]	S573	-1.07542	Agap3
Q8VHJ5	kPPEFEGGESLsSGSLcQR.Q8VHJ5	kPPEFEGGESLsSGSLcQR	0.53985	0.0153757	0.0274917	Q8VHJ5 1xPhospho [S382]	S382	0.400788	Mark1
Q8VHJ5	RDPsEGEASGR.Q8VHJ5	RDPsEGEASGR	0.717293	0.000540681	0.00152545	Q8VHJ5 1xPhospho [S666]	S666	0.400788	Mark1
Q8VHJ5	RFsDHAGPSIPPAVSYTk.Q8VHJ5	RFsDHAGPSIPPAVSYTk	0.676692	0.00141371	0.00347592	Q8VHJ5 1xPhospho [S423]	S423	0.400788	Mark1
Q8VHJ5	SIsANQk.Q8VHJ5	SIsANQk	0.607519	0.00535194	0.0111542	Q8VHJ5 1xPhospho [S414]	S414	0.400788	Mark1
Q8VHJ5	RPQANsVESEQkEEWGkDTAR.Q8VHJ5	RPQANsVESEQkEEWGkDTAR	0.657143	0.00212785	0.00498688	Q8VHJ5 1xPhospho [S444]	S444	0.400788	Mark1
Q8WTY4	EALsPEEVQSVQEHLGYHSDSLR.Q8WTY4	EALsPEEVQSVQEHLGYHSDSLR	0.109774	0.644162	0.695601	Q8WTY4 1xPhospho [S136]	S136	-0.690701	Ciapin1
Q91V14	EIQSITDESRGsIR.Q91V14	EIQSITDESRGsIR	0.365414	0.113735	0.156961	Q91V14 1xPhospho [S963]	S963	1.80919	Slc12a5
Q91V36	EREDEsEDESDILEESPcGR.Q91V36	EREDEsEDESDILEESPcGR	-0.389474	0.0905761	0.128933	Q91V36 1xPhospho [S20]	S20	-0.222411	Nrbp2
Q91V92	TAsFSESRADEVAPAk.Q91V92	TAsFSESRADEVAPAk	0.285714	0.221267	0.279614	Q91V92 1xPhospho [S455]	S455	-0.03172	Acly
Q91VM5	SGGPPPkRStPSGPVR.Q91VM5	SGGPPPkRStPSGPVR	0.445113	0.0506908	0.0773511	Q91VM5 1xPhospho [T163]	T163	-1.78444	Rbmxl1
Q91VM5	RStPSGPVR.Q91VM5	RStPSGPVR	0.84812	0	0	Q91VM5 1xPhospho [T163]	T163	-1.78444	Rbmxl1
Q91W39	REGsYDR.Q91W39	REGsYDR	0.960902	6.47297e-06	3.38235e-05	Q91W39 1xPhospho [S126]	S126	-2.1028	Ncoa5
Q91W39	DRsPIRGsPR.Q91W39	DRsPIRGsPR	0.888722	0	0	Q91W39 2xPhospho [S29; S34]	S29	-2.1028	Ncoa5
Q91W39	EGsYDR.Q91W39	EGsYDR	0.863158	0	0	Q91W39 1xPhospho [S126]	S126	-2.1028	Ncoa5
Q91W39	RDsRDIR.Q91W39	RDsRDIR	0.818045	7.84202e-06	3.89288e-05	Q91W39 1xPhospho [S51]; 1xPhospho [S66]	S51	-2.1028	Ncoa5
Q91W39	RDRsPIRGsPR.Q91W39	RDRsPIRGsPR	0.744361	0.000253438	0.000806955	Q91W39 2xPhospho [S29; S34]	S29	-2.1028	Ncoa5
Q91W50	SPAAPGQsPTGSVcYER.Q91W50	SPAAPGQsPTGSVcYER	-0.24812	0.290194	0.352518	Q91W50 1xPhospho [S123]	S123	-0.238192	Csde1
Q91XM9	QPsVTLQR.Q91XM9	QPsVTLQR	0.117293	0.621381	0.675964	Q91XM9 1xPhospho [S406]	S406	0.796898	Dlg2
Q91XM9	HYsPVEcDk.Q91XM9	HYsPVEcDk	0.709774	0.000654853	0.00179171	Q91XM9 1xPhospho [S365]	S365	0.796898	Dlg2
Q91XM9	LcDkPAsPR.Q91XM9	LcDkPAsPR	0.715789	0.000562121	0.00157649	Q91XM9 1xPhospho [S360]	S360	0.796898	Dlg2
Q91XM9	YQDEDGPHDHsLPR.Q91XM9	YQDEDGPHDHsLPR	0.166917	0.48018	0.542421	Q91XM9 1xPhospho [S28]	S28	0.796898	Dlg2
Q91XM9	AIsLEGEPR.Q91XM9	AIsLEGEPR	0.627068	0.00378742	0.00819853	Q91XM9 1xPhospho [S414]	S414	0.796898	Dlg2
Q91XV3	AEGAGTEEEGtPkESEPQAAADATEVk.Q91XV3	AEGAGTEEEGtPkESEPQAAADATEVk	0.757895	0.000164795	0.000552367	Q91XV3 1xPhospho [T36]	T36	0.554004	Basp1
Q91XV3	AEPEksEGAAEEQPEPAPAPEQEAAAPGPAAGGEAPk.Q91XV3	AEPEksEGAAEEQPEPAPAPEQEAAAPGPAAGGEAPk	0.796992	3.33058e-05	0.00013773	Q91XV3 1xPhospho [S92]	S92	0.554004	Basp1
Q91YM2	NEEENIySVPHDSTQGk.Q91YM2	NEEENIySVPHDSTQGk	-0.0586466	0.806535	0.83824	Q91YM2 1xPhospho [Y1105]	Y1105	-0.606139	Arhgap35
Q91YM2	TSFSVGsDDELGPIR.Q91YM2	TSFSVGsDDELGPIR	0.469173	0.0384427	0.0614509	Q91YM2 1xPhospho [S1179]	S1179	-0.606139	Arhgap35
Q91Z67	kQDsSQAIPLVVEScIR.Q91Z67	kQDsSQAIPLVVEScIR	-0.0962406	0.685959	0.73567	Q91Z67 1xPhospho [S500]	S500	-2.29303	Srgap2
Q91Z67	HSsLkNR.Q91Z67	HSsLkNR	0.852632	0	0	Q91Z67 1xPhospho [S909]	S909	-2.29303	Srgap2
Q91Z67	TNATsPGVNSSASPQATDk.Q91Z67	TNATsPGVNSSASPQATDk	0.792481	4.18073e-05	0.000169901	Q91Z67 1xPhospho [S1053]	S1053	-2.29303	Srgap2
Q91Z67	sPDSTANVR.Q91Z67	sPDSTANVR	0.772932	9.64371e-05	0.000352355	Q91Z67 1xPhospho [S206]	S206	-2.29303	Srgap2
Q91Z67	QTPRsPDSTANVR.Q91Z67	QTPRsPDSTANVR	0.784962	5.90806e-05	0.00022827	Q91Z67 1xPhospho [S206]	S206	-2.29303	Srgap2
Q91Z67	MTsPAk.Q91Z67	MTsPAk	0.124812	0.598936	0.655487	Q91Z67 1xPhospho [S3]; 1xMet-loss [N-Term]	S3	-2.29303	Srgap2
Q91Z69	GLNNDsPERR.Q91Z69	GLNNDsPERR	0.917293	3.54614e-06	2.4256e-05	Q91Z69 1xPhospho [S883]	S883	-2.456	Srgap1
Q91Z69	NSPTPATSTESLsPLHNVALR.Q91Z69	NSPTPATSTESLsPLHNVALR	0.834586	0	0	Q91Z69 1xPhospho [S987]	S987	-2.456	Srgap1
Q91Z69	DmNsPTDRHSDSYLAR.Q91Z69	DmNsPTDRHSDSYLAR	0.830075	8.92184e-07	8.16852e-06	Q91Z69 1xPhospho [S812]	S812	-2.456	Srgap1
Q91ZU6	QLsLLDSR.Q91ZU6	QLsLLDSR	0.912782	3.00375e-06	2.15301e-05	Q91ZU6 1xPhospho [S5407]	S5407	1.49293	Dst
Q91ZW3	TPTsPLk.Q91ZW3	TPTsPLk	0.736842	0.000316639	0.000981622	Q91ZW3 1xPhospho [S115]	S115	-1.70275	Smarca5
Q920I9	ARDsPPPSSNIVQGQIk.Q920I9	ARDsPPPSSNIVQGQIk	0.234586	0.317995	0.381367	Q920I9 1xPhospho [S935]	S935	1.96642	Wdr7
Q920I9	TYQVPPVQPAsPGSHNALk.Q920I9	TYQVPPVQPAsPGSHNALk	0.729323	0.000391689	0.00116516	Q920I9 1xPhospho [S1455]	S1455	1.96642	Wdr7
Q920N2	AAGEGPsPR.Q920N2	AAGEGPsPR	0.318797	0.170513	0.224018	Q920N2 1xPhospho [S73]	S73	1.3238	Hlcs
Q920R0	RLsLPGLLsQVSPR.Q920R0	RLsLPGLLsQVSPR	-0.342857	0.139151	0.18742	Q920R0 2xPhospho [S477; S483]	S477	0.0971529	Als2
Q920R0	SSsLmDIREEELEGGSR.Q920R0	SSsLmDIREEELEGGSR	-0.275188	0.239343	0.298449	Q920R0 1xPhospho [S460]	S460	0.0971529	Als2
Q920R0	QHkDsPEILSR.Q920R0	QHkDsPEILSR	-0.193985	0.410789	0.476621	Q920R0 1xPhospho [S1329]	S1329	0.0971529	Als2
Q922J3	TASESISNLSEAGsVk.Q922J3	TASESISNLSEAGsVk	0.383459	0.0960014	0.135915	Q922J3 1xPhospho [S203]	S203	0.0464693	Clip1
Q922S4	RPEAVQNTsVDASEDQkDEk.Q922S4	RPEAVQNTsVDASEDQkDEk	0.818045	7.84202e-06	3.89288e-05	Q922S4 1xPhospho [S204]	S204	1.58131	Pde2a
Q925T6	EPTNtL.Q925T6	EPTNtL	0.454135	0.0457847	0.0709692	Q925T6 1xPhospho [T1126]	T1126	-1.71361	Grip1
Q925T6	QAsFQER.Q925T6	QAsFQER	0.810526	1.46396e-05	6.80768e-05	Q925T6 1xPhospho [S952]	S952	-1.71361	Grip1
Q925T6	QTDAQSASsPk.Q925T6	QTDAQSASsPk	0.631579	0.00348625	0.00764506	Q925T6 1xPhospho [S761]	S761	-1.71361	Grip1
Q925T6	RQsIPEEFk.Q925T6	RQsIPEEFk	0.682707	0.00123879	0.00311087	Q925T6 1xPhospho [S43]	S43	-1.71361	Grip1
Q925T6	RQsIPEEFkGSTVVELmk.Q925T6	RQsIPEEFkGSTVVELmk	0.690226	0.00104547	0.00269735	Q925T6 1xPhospho [S43]	S43	-1.71361	Grip1
Q925T6	TSLsPVPkPR.Q925T6	TSLsPVPkPR	0.950376	6.15784e-06	3.37748e-05	Q925T6 1xPhospho [S846]	S846	-1.71361	Grip1
Q925T6	kQTDAQSASsPk.Q925T6	kQTDAQSASsPk	0.487218	0.0308957	0.0508375	Q925T6 1xPhospho [S761]	S761	-1.71361	Grip1
Q99104	kIGELEVGQmENIsPGQIIDEPIRPVNIPR.Q99104	kIGELEVGQmENIsPGQIIDEPIRPVNIPR	0.26015	0.266813	0.328181	Q99104 1xPhospho [S1450]	S1450	0.904284	Myo5a
Q99104	mLPELFQDDEkAIsPTSATSSGR.Q99104	mLPELFQDDEkAIsPTSATSSGR	0.941353	5.69497e-06	3.22202e-05	Q99104 1xPhospho [S600]	S600	0.904284	Myo5a
Q99104	AIsPTSATSSGR.Q99104	AIsPTSATSSGR	0.861654	0	0	Q99104 1xPhospho [S600]	S600	0.904284	Myo5a
Q99J77	ALGsPTk.Q99J77	ALGsPTk	0.461654	0.0419875	0.0661733	Q99J77 1xPhospho [S275]	S275	-2.10113	Nans
Q99JF8	QVDTEEAGmVTAATASNVkAsPk.Q99JF8	QVDTEEAGmVTAATASNVkAsPk	0.711278	0.00063059	0.00173745	Q99JF8 1xPhospho [S176]	S176	-1.18796	Psip1
Q99K01	VQGTGVtPPPTPLGTR.Q99K01	VQGTGVtPPPTPLGTR	0.548872	0.0135073	0.0245616	Q99K01 1xPhospho [T687]	T687	-0.366162	Pdxdc1
Q99L43	VVREDAPPEDkESESEAkLDGETAsDSESR.Q99L43	VVREDAPPEDkESESEAkLDGETAsDSESR	0.878195	0	0	Q99L43 1xPhospho [S32]	S32	1.61441	Cds2
Q99L43	LDGETAsDSESR.Q99L43	LDGETAsDSESR	0.47218	0.0370929	0.0596579	Q99L43 1xPhospho [S32]	S32	1.61441	Cds2
Q99L43	LDGETAsDSESRAETAPLPTSVDDTPEVLNR.Q99L43	LDGETAsDSESRAETAPLPTSVDDTPEVLNR	0.852632	0	0	Q99L43 1xPhospho [S32]	S32	1.61441	Cds2
Q99MI1	TNsTGGSSGNSVGGGSGk.Q99MI1	TNsTGGSSGNSVGGGSGk	0.530827	0.0174489	0.0305941	Q99MI1 1xPhospho [S37]	S37	-1.47192	Erc1
Q99MI1	VEPSSQSPGRsPR.Q99MI1	VEPSSQSPGRsPR	0.798496	3.07505e-05	0.00012967	Q99MI1 1xPhospho [S21]	S21	-1.47192	Erc1
Q99NE5	LQTHDESSLPLPQPsPFmPR.Q99NE5	LQTHDESSLPLPQPsPFmPR	-0.0827068	0.728677	0.774775	Q99NE5 1xPhospho [S716]	S716	1.10274	Rims1
Q99NE5	STSVSGEIYTLEHNDGSQsDTAVGTVGAGGk.Q99NE5	STSVSGEIYTLEHNDGSQsDTAVGTVGAGGk	-0.651128	0.00239933	0.00554036	Q99NE5 1xPhospho [S1187]	S1187	1.10274	Rims1
Q99NE5	mERPSISVIsPTSPGALk.Q99NE5	mERPSISVIsPTSPGALk	-0.159398	0.500462	0.562631	Q99NE5 1xPhospho [S563]	S563	1.10274	Rims1
Q99NE5	RAsQSSLESSSGPPcIR.Q99NE5	RAsQSSLESSSGPPcIR	0.545865	0.0141083	0.0254577	Q99NE5 1xPhospho [S1448]	S1448	1.10274	Rims1
Q99NE5	SRsEPPRER.Q99NE5	SRsEPPRER	0.416541	0.0689674	0.101679	Q99NE5 1xPhospho [S287]	S287	1.10274	Rims1
Q99NE5	ETsPISSHPVTWQPSkEGDR.Q99NE5	ETsPISSHPVTWQPSkEGDR	0.724812	0.0004431	0.00128877	Q99NE5 1xPhospho [S413]	S413	1.10274	Rims1
Q99NE5	QPsRESTDGSINSYSSEGNLIFPGVR.Q99NE5	QPsRESTDGSINSYSSEGNLIFPGVR	-0.230075	0.327614	0.390712	Q99NE5 1xPhospho [S1257]	S1257	1.10274	Rims1
Q99NE5	sLDEIHPTRR.Q99NE5	sLDEIHPTRR	0.693233	0.000975399	0.00254447	Q99NE5 1xPhospho [S812]	S812	1.10274	Rims1
Q99NE5	SRsQTPLSTAAVSSQDTASHGAPLDR.Q99NE5	SRsQTPLSTAAVSSQDTASHGAPLDR	0.0466165	0.846202	0.869102	Q99NE5 1xPhospho [S241]	S241	1.10274	Rims1
Q99NE5	GRsQDYPDRLEkR.Q99NE5	GRsQDYPDRLEkR	0.282707	0.226335	0.284339	Q99NE5 1xPhospho [S346]	S346	1.10274	Rims1
Q99NE5	GRWsPSLAR.Q99NE5	GRWsPSLAR	-0.526316	0.0185674	0.0323144	Q99NE5 1xPhospho [S908]	S908	1.10274	Rims1
Q99NE5	RAsQSSLESSSGPPcIRS.Q99NE5	RAsQSSLESSSGPPcIRS	-0.284211	0.223792	0.282047	Q99NE5 1xPhospho [S1448]	S1448	1.10274	Rims1
Q99NE5	LPNVPLQRsLDEIHPTRR.Q99NE5	LPNVPLQRsLDEIHPTRR	-0.0736842	0.757612	0.798683	Q99NE5 1xPhospho [S812]	S812	1.10274	Rims1
Q99NE5	SGsIEQASLVVEER.Q99NE5	SGsIEQASLVVEER	0.275188	0.239343	0.298449	Q99NE5 1xPhospho [S1051]	S1051	1.10274	Rims1
Q99NE5	ETsPISSHPVTWQPSk.Q99NE5	ETsPISSHPVTWQPSk	0.407519	0.0756779	0.110328	Q99NE5 1xPhospho [S413]	S413	1.10274	Rims1
Q99NE5	STIQRsTETGmAAEmR.Q99NE5	STIQRsTETGmAAEmR	0.633083	0.00339037	0.0074696	Q99NE5 1xPhospho [S1240]	S1240	1.10274	Rims1
Q99NE5	GRsQDYPDRLEk.Q99NE5	GRsQDYPDRLEk	0.559398	0.0115658	0.0214964	Q99NE5 1xPhospho [S346]	S346	1.10274	Rims1
Q99NE5	sAEcLHmTSELQPSLDR.Q99NE5	sAEcLHmTSELQPSLDR	0.111278	0.63958	0.691923	Q99NE5 1xPhospho [S866]	S866	1.10274	Rims1
Q99NE5	GRsQDYPDR.Q99NE5	GRsQDYPDR	0.696241	0.000909209	0.00239571	Q99NE5 1xPhospho [S346]	S346	1.10274	Rims1
Q99NE5	SVsPHRGDDQGRPR.Q99NE5	SVsPHRGDDQGRPR	0.777444	8.08652e-05	0.000302987	Q99NE5 1xPhospho [S790]	S790	1.10274	Rims1
Q99NE5	sLDEIHPTR.Q99NE5	sLDEIHPTR	0.628571	0.00368474	0.00799833	Q99NE5 1xPhospho [S812]	S812	1.10274	Rims1
Q99NF2	QGskEcPGcAQLVPGPSSR.Q99NF2	QGskEcPGcAQLVPGPSSR	0.846617	0	0	Q99NF2 1xPhospho [S166]	S166	2.21474	Nsmf
Q99NF2	ERsFSR.Q99NF2	ERsFSR	0.906767	2.22453e-06	1.72067e-05	Q99NF2 1xPhospho [S288]	S288	2.21474	Nsmf
Q99P72	ETkLsTEPSPEFSNYSEIAk.Q99P72	ETkLsTEPSPEFSNYSEIAk	0.843609	0	0	Q99P72 1xPhospho [S686]	S686	-1.40285	Rtn4
Q99P72	LSAsPQEVGkPYLESFQPNLHITk.Q99P72	LSAsPQEVGkPYLESFQPNLHITk	0.822556	4.73313e-06	2.94763e-05	Q99P72 1xPhospho [S768]	S768	-1.40285	Rtn4
Q99P72	EDGVmsPEkTmDIFNEmk.Q99P72	EDGVmsPEkTmDIFNEmk	0.753383	0.000191114	0.000630704	Q99P72 1xPhospho [S344]	S344	-1.40285	Rtn4
Q99P72	SRSsVSk.Q99P72	SRSsVSk	0.729323	0.000391689	0.00116516	Q99P72 1xPhospho [S914]	S914	-1.40285	Rtn4
Q99P72	LPEDDEPPARPPAPAGAsPLAEPAAPPSTPAAPk.Q99P72	LPEDDEPPARPPAPAGAsPLAEPAAPPSTPAAPk	0.839098	0	0	Q99P72 1xPhospho [S145]	S145	-1.40285	Rtn4
Q99P72	NENASFPRtPELVk.Q99P72	NENASFPRtPELVk	0.923308	4.20535e-06	2.74866e-05	Q99P72 1xPhospho [T430]	T430	-1.40285	Rtn4
Q99P72	AQIITEktSPk.Q99P72	AQIITEktSPk	0.86015	0	0	Q99P72 1xPhospho [T488]	T488	-1.40285	Rtn4
Q99P72	EAEEkLPsDTEkEDR.Q99P72	EAEEkLPsDTEkEDR	0.882707	0	0	Q99P72 1xPhospho [S953]	S953	-1.40285	Rtn4
Q99P72	LPsDTEkEDR.Q99P72	LPsDTEkEDR	0.56391	0.0108068	0.020359	Q99P72 1xPhospho [S953]	S953	-1.40285	Rtn4
Q99P72	DSESRNENASFPRtPELVk.Q99P72	DSESRNENASFPRtPELVk	0.813534	1.16574e-05	5.63242e-05	Q99P72 1xPhospho [T430]	T430	-1.40285	Rtn4
Q99P72	EDGVmsPEk.Q99P72	EDGVmsPEk	0.165414	0.484202	0.545917	Q99P72 1xPhospho [S344]	S344	-1.40285	Rtn4
Q99P72	ESAEFSVLEYSEmGSSFNGsPk.Q99P72	ESAEFSVLEYSEmGSSFNGsPk	0.708271	0.000679865	0.00185368	Q99P72 1xPhospho [S291]	S291	-1.40285	Rtn4
Q99P72	GPLPAAPPTAPERQPsWER.Q99P72	GPLPAAPPTAPERQPsWER	0.893233	3.11792e-07	3.00675e-06	Q99P72 1xPhospho [S105]	S105	-1.40285	Rtn4
Q99P72	DSESRNENASFPRtPELVkDGSR.Q99P72	DSESRNENASFPRtPELVkDGSR	0.431579	0.0588075	0.0878565	Q99P72 1xPhospho [T430]	T430	-1.40285	Rtn4
Q99P72	sPAASAPSLPPAAAVLPSk.Q99P72	sPAASAPSLPPAAAVLPSk	0.410526	0.0733881	0.107456	Q99P72 1xPhospho [S109]	S109	-1.40285	Rtn4
Q99P72	VLTkEAEEkLPsDTEkEDR.Q99P72	VLTkEAEEkLPsDTEkEDR	0.512782	0.0222752	0.0381745	Q99P72 1xPhospho [S953]	S953	-1.40285	Rtn4
Q99P72	DDsPkEYTDLEVSNk.Q99P72	DDsPkEYTDLEVSNk	0.509774	0.0231751	0.0395152	Q99P72 1xPhospho [S857]	S857	-1.40285	Rtn4
Q99PL5	kSEGsPNQGk.Q99PL5	kSEGsPNQGk	0.287218	0.218762	0.277342	Q99PL5 1xPhospho [S766]	S766	-0.876355	Rrbp1
Q99PL6	GksPQLALR.Q99PL6	GksPQLALR	0.347368	0.133767	0.18131	Q99PL6 1xPhospho [S36]	S36	0.449841	Ubxn6
Q99PV8	VLDkSsPPPSSR.Q99PV8	VLDkSsPPPSSR	0.642105	0.00285961	0.00644507	Q99PV8 1xPhospho [S96]	S96	-0.89921	Bcl11b
Q9CQC7	YkPAPLATLPSTLDPAEYDVsPETR.Q9CQC7	YkPAPLATLPSTLDPAEYDVsPETR	-0.109774	0.644162	0.695601	Q9CQC7 1xPhospho [S26]	S26	1.77937	Ndufb4
Q9CQI6	kAGGANYDAQsE.Q9CQI6	kAGGANYDAQsE	-0.178947	0.448625	0.512933	Q9CQI6 1xPhospho [S141]	S141	-0.931156	Cotl1
Q9CQI6	AGGANYDAQsE.Q9CQI6	AGGANYDAQsE	0.488722	0.0303245	0.0499325	Q9CQI6 1xPhospho [S141]	S141	-0.931156	Cotl1
Q9CQS8	MPGPTPSGTNVGSSGRsPSk.Q9CQS8	MPGPTPSGTNVGSSGRsPSk	0.299248	0.199406	0.255836	Q9CQS8 1xPhospho [S17]; 1xMet-loss [N-Term]	S17	-1.49536	Sec61b
Q9CYT6	THTPSPTsPk.Q9CYT6	THTPSPTsPk	0.837594	0	0	Q9CYT6 1xPhospho [S311]	S311	2.96108	Cap2
Q9CYT6	AQGQIRsPTk.Q9CYT6	AQGQIRsPTk	0.891729	9.31678e-08	9.28915e-07	Q9CYT6 1xPhospho [S300]	S300	2.96108	Cap2
Q9CYZ2	HSIsmPVmR.Q9CYZ2	HSIsmPVmR	0.345865	0.135545	0.183402	Q9CYZ2 1xPhospho [S168]	S168	0.807171	Tpd52l2
Q9CZ44	RHsGQDVHVVLk.Q9CZ44	RHsGQDVHVVLk	-0.342857	0.139151	0.18742	Q9CZ44 1xPhospho [S176]	S176	-0.13536	Nsfl1c
Q9CZW5	NSERktPEGR.Q9CZW5	NSERktPEGR	0.915789	3.36969e-06	2.35979e-05	Q9CZW5 1xPhospho [T88]	T88	2.0617	Tomm70
Q9D0R2	ASsPSGk.Q9D0R2	ASsPSGk	-0.269173	0.250097	0.3094	Q9D0R2 1xPhospho [S8]	S8	-0.556968	Tars1
Q9D394	FRVsmDGEWLcLR.Q9D394	FRVsmDGEWLcLR	0.207519	0.378315	0.44531	Q9D394 1xPhospho [S34]	S34	-0.374123	Rufy3
Q9D6E4	cSLQREDsDGGTGGPAR.Q9D6E4	cSLQREDsDGGTGGPAR	0.303759	0.19246	0.248142	Q9D6E4 1xPhospho [S226]	S226	-0.782479	Ttc9b
Q9D8S3	STGSSDRPsAR.Q9D8S3	STGSSDRPsAR	-0.121805	0.607873	0.663108	Q9D8S3 1xPhospho [S408]	S408	0.32628	Arfgap3
Q9D8S3	LTNTsFTEIEk.Q9D8S3	LTNTsFTEIEk	0.112782	0.635011	0.689198	Q9D8S3 1xPhospho [S241]	S241	0.32628	Arfgap3
Q9DB75	SGAPLtPGR.Q9DB75	SGAPLtPGR	0.548872	0.0135073	0.0245616	Q9DB75 1xPhospho [T27]	T27	1.79976	Cdip1
Q9DBC7	TDSREDEIsPPPPNPVVk.Q9DBC7	TDSREDEIsPPPPNPVVk	-0.675188	0.00146046	0.00355741	Q9DBC7 1xPhospho [S83]	S83	0.920502	Prkar1a
Q9DBR7	DkksPLIESTANmENNQPQk.Q9DBR7	DkksPLIESTANmENNQPQk	0.609023	0.00521528	0.010947	Q9DBR7 1xPhospho [S299]	S299	0.553277	Ppp1r12a
Q9DBR7	SLPSSTSTAAktPPGSSSAGTQSSTSNR.Q9DBR7	SLPSSTSTAAktPPGSSSAGTQSSTSNR	0.520301	0.0201482	0.0347571	Q9DBR7 1xPhospho [T596]	T596	0.553277	Ppp1r12a
Q9DBR7	IsPkEEER.Q9DBR7	IsPkEEER	0.445113	0.0506908	0.0773511	Q9DBR7 1xPhospho [S422]	S422	0.553277	Ppp1r12a
Q9DBT5	QIsQDVkLEPDILLR.Q9DBT5	QIsQDVkLEPDILLR	0.547368	0.0138052	0.0250066	Q9DBT5 1xPhospho [S87]	S87	-0.0104299	Ampd2
Q9DC53	GIkPSPAPPPYtPPTHVLQTQI.Q9DC53	GIkPSPAPPPYtPPTHVLQTQI	0.902256	1.60549e-06	1.32088e-05	Q9DC53 1xPhospho [T567]	T567	-2.13239	Cpne8
Q9DCB4	GDsTSSTR.Q9DCB4	GDsTSSTR	0.443609	0.0515469	0.0785047	Q9DCB4 1xPhospho [S393]	S393	-0.223612	Arpp21
Q9DCB4	TAsFGGITVLTR.Q9DCB4	TAsFGGITVLTR	0.625564	0.00389246	0.00838732	Q9DCB4 1xPhospho [S381]	S381	-0.223612	Arpp21
Q9DCP2	SPskEPHFTDFEGk.Q9DCP2	SPskEPHFTDFEGk	0.509774	0.0231751	0.0395152	Q9DCP2 1xPhospho [S53]	S53	1.53271	Slc38a3
Q9EP53	DSLSGsQR.Q9EP53	DSLSGsQR	-0.231579	0.324388	0.387454	Q9EP53 1xPhospho [S512]	S512	0.28639	Tsc1
Q9EP53	DSLSGsQRk.Q9EP53	DSLSGsQRk	0.0706767	0.76733	0.806039	Q9EP53 1xPhospho [S512]	S512	0.28639	Tsc1
Q9EP53	QAFTPIDPPSGSADVsPAGDRDR.Q9EP53	QAFTPIDPPSGSADVsPAGDRDR	-0.121805	0.607873	0.663108	Q9EP53 1xPhospho [S562]	S562	0.28639	Tsc1
Q9EPJ9	AksPSSDSWTcADASTGR.Q9EPJ9	AksPSSDSWTcADASTGR	0.625564	0.00389246	0.00838732	Q9EPJ9 1xPhospho [S342]	S342	2.15474	Arfgap1
Q9EPN1	TPLENVPGNLsPIkDPDRLLQDVDINR.Q9EPN1	TPLENVPGNLsPIkDPDRLLQDVDINR	0.499248	0.0265576	0.0442877	Q9EPN1 1xPhospho [S1519]	S1519	-0.471031	Nbea
Q9EPN1	QEINsPTSTVVVIPSIPHPSLNHGLLAk.Q9EPN1	QEINsPTSTVVVIPSIPHPSLNHGLLAk	0.359398	0.12015	0.164655	Q9EPN1 1xPhospho [S1596]	S1596	-0.471031	Nbea
Q9EPN1	EAHAILPmQFHsFDR.Q9EPN1	EAHAILPmQFHsFDR	-0.306767	0.187923	0.242957	Q9EPN1 1xPhospho [S1776]	S1776	-0.471031	Nbea
Q9EPN1	EIEDLSQSQsPESETDYPVSTDTR.Q9EPN1	EIEDLSQSQsPESETDYPVSTDTR	0.580451	0.00836368	0.0162777	Q9EPN1 1xPhospho [S1001]	S1001	-0.471031	Nbea
Q9EPN1	TPLENVPGNLsPIkDPDR.Q9EPN1	TPLENVPGNLsPIkDPDR	0.66015	0.00200192	0.00471995	Q9EPN1 1xPhospho [S1519]	S1519	-0.471031	Nbea
Q9EPN1	RQFsPGPR.Q9EPN1	RQFsPGPR	0.610526	0.00508152	0.0106948	Q9EPN1 1xPhospho [S1311]	S1311	-0.471031	Nbea
Q9EPN1	AVPNVDAGSIIsDTER.Q9EPN1	AVPNVDAGSIIsDTER	0.0902256	0.704837	0.752829	Q9EPN1 1xPhospho [S1252]	S1252	-0.471031	Nbea
Q9EPN1	QFsPGPR.Q9EPN1	QFsPGPR	0.473684	0.0364322	0.0588366	Q9EPN1 1xPhospho [S1311]	S1311	-0.471031	Nbea
Q9EQH3	MPTTQQsPQDEQEk.Q9EQH3	MPTTQQsPQDEQEk	0.609023	0.00521528	0.010947	Q9EQH3 1xPhospho [S7]; 1xMet-loss [N-Term]	S7	0.755536	Vps35
Q9EQH3	MPTTQQsPQDEQEkLLDEAIQAVk.Q9EQH3	MPTTQQsPQDEQEkLLDEAIQAVk	0.338346	0.144689	0.194433	Q9EQH3 1xPhospho [S7]; 1xMet-loss [N-Term]	S7	0.755536	Vps35
Q9EQH3	SRREsPESEGPIYEGLIL.Q9EQH3	SRREsPESEGPIYEGLIL	-0.221053	0.347374	0.412606	Q9EQH3 1xPhospho [S783]	S783	0.755536	Vps35
Q9EQH3	REsPESEGPIYEGLIL.Q9EQH3	REsPESEGPIYEGLIL	0.482707	0.0326611	0.0533692	Q9EQH3 1xPhospho [S783]	S783	0.755536	Vps35
Q9EQJ9	GFGFAIADsPTGQk.Q9EQJ9	GFGFAIADsPTGQk	0.533835	0.0167341	0.0295389	Q9EQJ9 1xPhospho [S598]	S598	-0.542356	Magi3
Q9EQZ7	RHsDVSLANAELEDSR.Q9EQZ7	RHsDVSLANAELEDSR	0.231579	0.324388	0.387454	Q9EQZ7 1xPhospho [S409]	S409	0.880391	Rims2
Q9EQZ7	YRsDPNLAR.Q9EQZ7	YRsDPNLAR	-0.506767	0.024104	0.0408327	Q9EQZ7 1xPhospho [S375]	S375	0.880391	Rims2
Q9EQZ7	TGSVQTsPSSTPGTGR.Q9EQZ7	TGSVQTsPSSTPGTGR	0.813534	1.16574e-05	5.63242e-05	Q9EQZ7 1xPhospho [S1095]	S1095	0.880391	Rims2
Q9EQZ7	RADsLRk.Q9EQZ7	RADsLRk	0.0075188	0.977178	0.981767	Q9EQZ7 1xPhospho [S493]	S493	0.880391	Rims2
Q9EQZ7	TSNHsPPTPR.Q9EQZ7	TSNHsPPTPR	0.690226	0.00104547	0.00269735	Q9EQZ7 1xPhospho [S472]	S472	0.880391	Rims2
Q9EQZ7	QLHGEsPTR.Q9EQZ7	QLHGEsPTR	0	1	1	Q9EQZ7 1xPhospho [S965]	S965	0.880391	Rims2
Q9EQZ7	RQLHGEsPTR.Q9EQZ7	RQLHGEsPTR	0.159398	0.500462	0.562631	Q9EQZ7 1xPhospho [S965]	S965	0.880391	Rims2
Q9EQZ7	SPsDYADRR.Q9EQZ7	SPsDYADRR	0.318797	0.170513	0.224018	Q9EQZ7 1xPhospho [S311]	S311	0.880391	Rims2
Q9ER00	AGSRLsAEDR.Q9ER00	AGSRLsAEDR	0.365414	0.113735	0.156961	Q9ER00 1xPhospho [S142]	S142	-0.51897	Stx12
Q9ERR1	GTENSFPsPk.Q9ERR1	GTENSFPsPk	0.702256	0.00078778	0.00211603	Q9ERR1 1xPhospho [S231]	S231	0.228793	Ndel1
Q9ES00	HLLNsPTDPFNR.Q9ES00	HLLNsPTDPFNR	0.796992	3.33058e-05	0.00013773	Q9ES00 1xPhospho [S1136]	S1136	-1.16345	Ube4b
Q9ES28	IksFDSLGSQSSHSR.Q9ES28	IksFDSLGSQSSHSR	0.406015	0.076843	0.111819	Q9ES28 1xPhospho [S132]	S132	-0.224688	Arhgef7
Q9ES28	msGFIYQGk.Q9ES28	msGFIYQGk	-0.075188	0.752766	0.795713	Q9ES28 1xPhospho [S497]	S497	-0.224688	Arhgef7
Q9ES28	kPsDEEFAVR.Q9ES28	kPsDEEFAVR	0.111278	0.63958	0.691923	Q9ES28 1xPhospho [S673]	S673	-0.224688	Arhgef7
Q9ES97	SEmcENSEQPQAQPEtPTQk.Q9ES97	SEmcENSEQPQAQPEtPTQk	0.756391	0.000173236	0.000579012	Q9ES97 1xPhospho [T524]	T524	2.5001	Rtn3
Q9ESK9	STELVLsPDmPR.Q9ESK9	STELVLsPDmPR	-0.72782	0.000408267	0.00120685	Q9ESK9 1xPhospho [S243]	S243	0.132109	Rb1cc1
Q9ESN6	SADVsPTTEGVkR.Q9ESN6	SADVsPTTEGVkR	0.302256	0.194757	0.250828	Q9ESN6 1xPhospho [S428]	S428	-0.445515	Trim2
Q9ESN6	SADVsPTTEGVk.Q9ESN6	SADVsPTTEGVk	-0.506767	0.024104	0.0408327	Q9ESN6 1xPhospho [S428]	S428	-0.445515	Trim2
Q9ESN9	QLsPNGGQEDTR.Q9ESN9	QLsPNGGQEDTR	0.517293	0.0209784	0.0361363	Q9ESN9 1xPhospho [S677]	S677	-0.0744641	Mapk8ip3
Q9ESN9	STHPsPEk.Q9ESN9	STHPsPEk	0.475188	0.0357808	0.0579039	Q9ESN9 1xPhospho [S755]	S755	-0.0744641	Mapk8ip3
Q9ESN9	STHPsPEkk.Q9ESN9	STHPsPEkk	0.684211	0.00119796	0.00303423	Q9ESN9 1xPhospho [S755]	S755	-0.0744641	Mapk8ip3
Q9ESN9	SYPSVNIHYksPTAAGFSQR.Q9ESN9	SYPSVNIHYksPTAAGFSQR	0.520301	0.0201482	0.0347571	Q9ESN9 1xPhospho [S603]	S603	-0.0744641	Mapk8ip3
Q9ESN9	TGSsPTQGIVNk.Q9ESN9	TGSsPTQGIVNk	0.6	0.00608027	0.01243	Q9ESN9 1xPhospho [S366]	S366	-0.0744641	Mapk8ip3
Q9ESN9	STHPsPEkkk.Q9ESN9	STHPsPEkkk	0.454135	0.0457847	0.0709692	Q9ESN9 1xPhospho [S755]	S755	-0.0744641	Mapk8ip3
Q9JHU2	mELsPSR.Q9JHU2	mELsPSR	0.577444	0.0087704	0.0169292	Q9JHU2 1xPhospho [S370]	S370	1.37191	Palmd
Q9JHU2	QNEHEVsPR.Q9JHU2	QNEHEVsPR	-0.273684	0.242002	0.30065	Q9JHU2 1xPhospho [S364]	S364	1.37191	Palmd
Q9JHU2	VIsPGPNFQER.Q9JHU2	VIsPGPNFQER	0.696241	0.000909209	0.00239571	Q9JHU2 1xPhospho [S278]	S278	1.37191	Palmd
Q9JHU2	SGPQcSsPTcQEETEDVR.Q9JHU2	SGPQcSsPTcQEETEDVR	0.485714	0.0314755	0.0516831	Q9JHU2 1xPhospho [S385]	S385	1.37191	Palmd
Q9JIS5	AEsGGk.Q9JIS5	AEsGGk	0.930827	4.91748e-06	2.99762e-05	Q9JIS5 1xPhospho [S106]	S106	2.63328	Sv2a
Q9JIS5	GGLsDGEGPPGGR.Q9JIS5	GGLsDGEGPPGGR	0.83609	0	0	Q9JIS5 1xPhospho [S127]	S127	2.63328	Sv2a
Q9JIS5	AEsGGkGER.Q9JIS5	AEsGGkGER	0.947368	6.02399e-06	3.32734e-05	Q9JIS5 1xPhospho [S106]	S106	2.63328	Sv2a
Q9JIS5	GGLsDGEGPPGGRGEAQR.Q9JIS5	GGLsDGEGPPGGRGEAQR	0.882707	0	0	Q9JIS5 1xPhospho [S127]	S127	2.63328	Sv2a
Q9JJG0	TPSsPSk.Q9JJG0	TPSsPSk	0.732331	0.000360143	0.00108504	Q9JJG0 1xPhospho [S583]	S583	-1.63177	Tacc2
Q9JJG0	VQNsPPVGR.Q9JJG0	VQNsPPVGR	0.900752	1.39393e-06	1.1927e-05	Q9JJG0 1xPhospho [S419]	S419	-1.63177	Tacc2
Q9JJG0	VQNsPPVGRk.Q9JJG0	VQNsPPVGRk	0.819549	6.73162e-06	3.38451e-05	Q9JJG0 1xPhospho [S419]	S419	-1.63177	Tacc2
Q9JJG0	RksTESVPPSk.Q9JJG0	RksTESVPPSk	0.885714	0	0	Q9JJG0 1xPhospho [S265]	S265	-1.63177	Tacc2
Q9JJY3	AVPGsIkR.Q9JJY3	AVPGsIkR	0.230075	0.327614	0.390712	Q9JJY3 1xPhospho [S202]	S202	-0.129313	Smpd3
Q9JKC6	GkSASsPkPDTkVPQATAEAk.Q9JKC6	GkSASsPkPDTkVPQATAEAk	0.628571	0.00368474	0.00799833	Q9JKC6 1xPhospho [S10]	S10	3.46393	Cend1
Q9JKV1	SQSAAVtPSSSTSSAR.Q9JKV1	SQSAAVtPSSSTSSAR	0.243609	0.299285	0.362439	Q9JKV1 1xPhospho [T217]	T217	-0.460079	Adrm1
Q9JL04	TPGAGGsVHLLGR.Q9JL04	TPGAGGsVHLLGR	0.160902	0.496372	0.558834	Q9JL04 1xPhospho [S476]	S476	1.59587	Fmn2
Q9JL04	LPEEEPsPkDVDTEPk.Q9JL04	LPEEEPsPkDVDTEPk	0.723308	0.000461386	0.00133208	Q9JL04 1xPhospho [S614]	S614	1.59587	Fmn2
Q9JL04	GsPGEEWVPEVEEASQR.Q9JL04	GsPGEEWVPEVEEASQR	-0.245113	0.296235	0.359115	Q9JL04 1xPhospho [S339]	S339	1.59587	Fmn2
Q9JL04	sADWTEELGVR.Q9JL04	sADWTEELGVR	0.418045	0.0678948	0.100286	Q9JL04 1xPhospho [S459]	S459	1.59587	Fmn2
Q9JLC8	DSAPTTPTsPTEFLTPGLR.Q9JLC8	DSAPTTPTsPTEFLTPGLR	0.566917	0.0103238	0.0195273	Q9JLC8 1xPhospho [S4266]	S4266	1.15737	Sacs
Q9JLM8	GTTksPGPSR.Q9JLM8	GTTksPGPSR	0.875188	0	0	Q9JLM8 1xPhospho [S298]	S298	-1.52953	Dclk1
Q9JLM8	VNGLPsPTHSAHcSFYR.Q9JLM8	VNGLPsPTHSAHcSFYR	0.491729	0.0292073	0.0482617	Q9JLM8 1xPhospho [S32]	S32	-1.52953	Dclk1
Q9JLM8	REEsEEGFQIPATITER.Q9JLM8	REEsEEGFQIPATITER	0.590977	0.00706009	0.0140783	Q9JLM8 1xPhospho [S392]	S392	-1.52953	Dclk1
Q9JLM8	STsYTk.Q9JLM8	STsYTk	0.745865	0.000242084	0.000774997	Q9JLM8 1xPhospho [S283]	S283	-1.52953	Dclk1
Q9JLM8	RGTTksPGPSR.Q9JLM8	RGTTksPGPSR	0.807519	1.80072e-05	8.10153e-05	Q9JLM8 1xPhospho [S298]	S298	-1.52953	Dclk1
Q9JLM8	sPGPSR.Q9JLM8	sPGPSR	0.700752	0.00081682	0.00217418	Q9JLM8 1xPhospho [S298]	S298	-1.52953	Dclk1
Q9JM13	QTsIETDR.Q9JM13	QTsIETDR	0.578947	0.00856506	0.016601	Q9JM13 1xPhospho [S132]	S132	0.270227	Rabgef1
Q9JM52	GQsPPTkDGGSDYQSR.Q9JM52	GQsPPTkDGGSDYQSR	0.64812	0.00254541	0.00583188	Q9JM52 1xPhospho [S903]	S903	2.71977	Mink1
Q9JM52	QNsDPTSEGPGPSPNPPSWVRPDNEAPPk.Q9JM52	QNsDPTSEGPGPSPNPPSWVRPDNEAPPk	0.204511	0.3854	0.451167	Q9JM52 1xPhospho [S644]	S644	2.71977	Mink1
Q9JM52	SQsLQDQPTR.Q9JM52	SQsLQDQPTR	0.82406	3.83879e-06	2.58077e-05	Q9JM52 1xPhospho [S603]	S603	2.71977	Mink1
Q9JM52	SDSVLPASHGHLPQAGsLER.Q9JM52	SDSVLPASHGHLPQAGsLER	0.690226	0.00104547	0.00269735	Q9JM52 1xPhospho [S729]	S729	2.71977	Mink1
Q9JM52	QNsDPTSEGPGPSPNPPSWVRPDNEAPPkVPQR.Q9JM52	QNsDPTSEGPGPSPNPPSWVRPDNEAPPkVPQR	0.858647	0	0	Q9JM52 1xPhospho [S644]	S644	2.71977	Mink1
Q9JMA1	VNQQPNANDkNsPPkEIk.Q9JMA1	VNQQPNANDkNsPPkEIk	0.634586	0.00329667	0.00729733	Q9JMA1 1xPhospho [S393]	S393	0.63226	Usp14
Q9JME5	GLHVGtPk.Q9JME5	GLHVGtPk	0.76391	0.000134123	0.000461392	Q9JME5 1xPhospho [T910]	T910	1.05458	Ap3b2
Q9JME5	AFYGsEEDEAk.Q9JME5	AFYGsEEDEAk	0.166917	0.48018	0.542421	Q9JME5 1xPhospho [S272]	S272	1.05458	Ap3b2
Q9JME5	AFYGsEEDEAkGPGSEEAATAALPAR.Q9JME5	AFYGsEEDEAkGPGSEEAATAALPAR	0.870677	0	0	Q9JME5 1xPhospho [S272]	S272	1.05458	Ap3b2
Q9JMH9	FGsLAk.Q9JMH9	FGsLAk	0.8	2.83262e-05	0.000119877	Q9JMH9 1xPhospho [S126]	S126	0.585678	Myo18a
Q9JMH9	sLAHADEAR.Q9JMH9	sLAHADEAR	0.771429	0.000102087	0.000367856	Q9JMH9 1xPhospho [S865]	S865	0.585678	Myo18a
Q9JMH9	RFsFSQR.Q9JMH9	RFsFSQR	0.418045	0.0678948	0.100286	Q9JMH9 1xPhospho [S140]	S140	0.585678	Myo18a
Q9JMK2	IQQTGNTsPR.Q9JMK2	IQQTGNTsPR	0.801504	2.60281e-05	0.00011095	Q9JMK2 1xPhospho [S363]	S363	-1.5339	Csnk1e
Q9QVP9	RNsLPQIPTLNLEAR.Q9QVP9	RNsLPQIPTLNLEAR	0.756391	0.000173236	0.000579012	Q9QVP9 1xPhospho [S375]	S375	0.793022	Ptk2b
Q9QWI6	SAsQTk.Q9QWI6	SAsQTk	0.8	2.83262e-05	0.000119877	Q9QWI6 1xPhospho [S241]	S241	1.27583	Srcin1
Q9QWI6	NSSIsF.Q9QWI6	NSSIsF	0.607519	0.00535194	0.0111542	Q9QWI6 1xPhospho [S1249]	S1249	1.27583	Srcin1
Q9QWI6	EmVYAsREsSPTR.Q9QWI6	EmVYAsREsSPTR	-0.135338	0.568108	0.626116	Q9QWI6 2xPhospho [S353; S356]	S353	1.27583	Srcin1
Q9QWI6	SsPPmLSADDAEYPR.Q9QWI6	SsPPmLSADDAEYPR	-0.393985	0.0866607	0.124185	Q9QWI6 1xPhospho [S47]	S47	1.27583	Srcin1
Q9QWI6	FSNVGLVHTsERR.Q9QWI6	FSNVGLVHTsERR	0.342857	0.139151	0.18742	Q9QWI6 1xPhospho [S87]	S87	1.27583	Srcin1
Q9QWI6	kAEsEELEVQkPQVk.Q9QWI6	kAEsEELEVQkPQVk	0.896241	7.48063e-07	6.90272e-06	Q9QWI6 1xPhospho [S1110]	S1110	1.27583	Srcin1
Q9QWI6	RFsNVGLVHTSER.Q9QWI6	RFsNVGLVHTSER	0.27218	0.244681	0.303497	Q9QWI6 1xPhospho [S79]	S79	1.27583	Srcin1
Q9QWI6	DSGSSSVFAEsPGGk.Q9QWI6	DSGSSSVFAEsPGGk	0.556391	0.0120956	0.0223049	Q9QWI6 1xPhospho [S588]	S588	1.27583	Srcin1
Q9QWI6	HTVIAAQsLEALSGLQk.Q9QWI6	HTVIAAQsLEALSGLQk	-0.454135	0.0457847	0.0709692	Q9QWI6 1xPhospho [S98]	S98	1.27583	Srcin1
Q9QWI6	TLGGGGGGGsGGR.Q9QWI6	TLGGGGGGGsGGR	0.371429	0.107575	0.149955	Q9QWI6 1xPhospho [S73]	S73	1.27583	Srcin1
Q9QWI6	TLGGGGGGGsGGRR.Q9QWI6	TLGGGGGGGsGGRR	0.613534	0.00482246	0.0101769	Q9QWI6 1xPhospho [S73]	S73	1.27583	Srcin1
Q9QWI6	LADVSAPSGGPPPPHsPYSGPPSR.Q9QWI6	LADVSAPSGGPPPPHsPYSGPPSR	-0.0390977	0.871187	0.889715	Q9QWI6 1xPhospho [S559]	S559	1.27583	Srcin1
Q9QWI6	ARsPREEVGPR.Q9QWI6	ARsPREEVGPR	0.810526	1.46396e-05	6.80768e-05	Q9QWI6 1xPhospho [S25]	S25	1.27583	Srcin1
Q9QWI6	RGsDELTVPR.Q9QWI6	RGsDELTVPR	0.810526	1.46396e-05	6.80768e-05	Q9QWI6 1xPhospho [S1054]	S1054	1.27583	Srcin1
Q9QWI6	FRQsLPLSR.Q9QWI6	FRQsLPLSR	-0.147368	0.533777	0.595532	Q9QWI6 1xPhospho [S233]	S233	1.27583	Srcin1
Q9QWI6	ESsPTRR.Q9QWI6	ESsPTRR	0.914286	3.18884e-06	2.27374e-05	Q9QWI6 1xPhospho [S357]	S357	1.27583	Srcin1
Q9QWI6	QVDEGmWPPPNNLLNQsPk.Q9QWI6	QVDEGmWPPPNNLLNQsPk	0.365414	0.113735	0.156961	Q9QWI6 1xPhospho [S911]	S911	1.27583	Srcin1
Q9QWY8	SPRPQSFcHsSSISPQDk.Q9QWY8	SPRPQSFcHsSSISPQDk	0.721805	0.000480272	0.00137647	Q9QWY8 1xPhospho [S757]	S757	2.34324	Asap1
Q9QWY8	SHTGDLsPNVQSR.Q9QWY8	SHTGDLsPNVQSR	0.748872	0.000220568	0.000720829	Q9QWY8 1xPhospho [S1045]	S1045	2.34324	Asap1
Q9QX47	ESAQAVAVALsPk.Q9QX47	ESAQAVAVALsPk	0.457143	0.0442348	0.0688845	Q9QX47 1xPhospho [S1723]	S1723	-1.2652	Son
Q9QX47	sPDPYR.Q9QX47	sPDPYR	0.415038	0.0700529	0.103086	Q9QX47 1xPhospho [S905]	S905	-1.2652	Son
Q9QXJ1	LGSQtP.Q9QXJ1	LGSQtP	0.457143	0.0442348	0.0688845	Q9QXJ1 1xPhospho [T709]	T709	0.31628	Apbb1
Q9QXL1	LQAENsEETDENEAEEEEEER.Q9QXL1	LQAENsEETDENEAEEEEEER	0.446617	0.0498458	0.0763092	Q9QXL1 1xPhospho [S580]	S580	-3.43149	Kif21b
Q9QXL1	EHLQAEsPEEEk.Q9QXL1	EHLQAEsPEEEk	0.807519	1.80072e-05	8.10153e-05	Q9QXL1 1xPhospho [S969]	S969	-3.43149	Kif21b
Q9QXL1	AVsAEcLGPPLDSSTk.Q9QXL1	AVsAEcLGPPLDSSTk	0.956391	6.36631e-06	3.38235e-05	Q9QXL1 1xPhospho [S1150]	S1150	-3.43149	Kif21b
Q9QXL1	GATDTsPLTRR.Q9QXL1	GATDTsPLTRR	0.778947	7.61096e-05	0.000286537	Q9QXL1 1xPhospho [S1217]	S1217	-3.43149	Kif21b
Q9QXL1	GASQsFSk.Q9QXL1	GASQsFSk	0.416541	0.0689674	0.101679	Q9QXL1 1xPhospho [S908]	S908	-3.43149	Kif21b
Q9QXL2	kVPEPsPVTR.Q9QXL2	kVPEPsPVTR	-0.117293	0.621381	0.675964	Q9QXL2 1xPhospho [S1241]	S1241	1.68204	Kif21a
Q9QXL2	kVPEPsPVTRR.Q9QXL2	kVPEPsPVTRR	-0.452632	0.0465754	0.0720052	Q9QXL2 1xPhospho [S1241]	S1241	1.68204	Kif21a
Q9QXS1	AQLEPVAsPAk.Q9QXS1	AQLEPVAsPAk	0.84812	0	0	Q9QXS1 1xPhospho [S1443]	S1443	2.65102	Plec
Q9QXS1	NDESQLsPATR.Q9QXS1	NDESQLsPATR	0.864662	0	0	Q9QXS1 1xPhospho [S728]	S728	2.65102	Plec
Q9QXS1	RAsFAEk.Q9QXS1	RAsFAEk	0.957895	6.40648e-06	3.38235e-05	Q9QXS1 1xPhospho [S1729]	S1729	2.65102	Plec
Q9QXS6	LSsPVLHR.Q9QXS6	LSsPVLHR	0.960902	6.47297e-06	3.38235e-05	Q9QXS6 1xPhospho [S142]	S142	-1.44531	Dbn1
Q9QXS6	EGTQASEGYFSQsQEEEFAQSEEPcAk.Q9QXS6	EGTQASEGYFSQsQEEEFAQSEEPcAk	0.545865	0.0141083	0.0254577	Q9QXS6 1xPhospho [S658]	S658	-1.44531	Dbn1
Q9QXZ0	LLDAEDVDVPsPDEk.Q9QXZ0	LLDAEDVDVPsPDEk	0.467669	0.0391321	0.0624256	Q9QXZ0 1xPhospho [S280]	S280	-0.743495	Macf1
Q9QXZ0	RQGsFSEDVISHk.Q9QXZ0	RQGsFSEDVISHk	0.0270677	0.911407	0.923575	Q9QXZ0 1xPhospho [S3889]	S3889	-0.743495	Macf1
Q9QXZ0	RksQDSVLDPAER.Q9QXZ0	RksQDSVLDPAER	0.839098	0	0	Q9QXZ0 1xPhospho [S57]	S57	-0.743495	Macf1
Q9QXZ0	AmDATLsPTkTETVk.Q9QXZ0	AmDATLsPTkTETVk	0.335338	0.148467	0.198943	Q9QXZ0 1xPhospho [S4458]	S4458	-0.743495	Macf1
Q9QXZ0	AAsPTR.Q9QXZ0	AAsPTR	0.560902	0.0113081	0.0211343	Q9QXZ0 1xPhospho [S7196]	S7196	-0.743495	Macf1
Q9QXZ0	QGsFSEDVISHkGDLR.Q9QXZ0	QGsFSEDVISHkGDLR	0.36391	0.115314	0.158768	Q9QXZ0 1xPhospho [S3889]	S3889	-0.743495	Macf1
Q9QY01	TPLPTIIGsPTk.Q9QY01	TPLPTIIGsPTk	0.837594	0	0	Q9QY01 1xPhospho [S600]	S600	-0.388736	Ulk2
Q9QYB5	NGETsPR.Q9QYB5	NGETsPR	0.628571	0.00368474	0.00799833	Q9QYB5 1xPhospho [S461]	S461	0.604203	Add3
Q9QYB8	AGTksPAVsPSk.Q9QYB8	AGTksPAVsPSk	0.673684	0.00150847	0.00365544	Q9QYB8 2xPhospho [S614; S618]	S614	0.463917	Add2
Q9QYB8	SPAVsPSkTSEDTk.Q9QYB8	SPAVsPSkTSEDTk	0.634586	0.00329667	0.00729733	Q9QYB8 1xPhospho [S618]	S618	0.463917	Add2
Q9QYB8	SRsPSTESQLmSk.Q9QYB8	SRsPSTESQLmSk	0.309774	0.18346	0.238366	Q9QYB8 1xPhospho [S530]	S530	0.463917	Add2
Q9QYC0	SPGtPAGEGSGSPPkWQIGEQEFEALmR.Q9QYC0	SPGtPAGEGSGSPPkWQIGEQEFEALmR	-0.294737	0.206522	0.263386	Q9QYC0 1xPhospho [T358]	T358	0.122312	Add1
Q9QYC0	kQkGsEENLDETR.Q9QYC0	kQkGsEENLDETR	0.368421	0.110623	0.153386	Q9QYC0 1xPhospho [S586]	S586	0.122312	Add1
Q9QYC0	GsEENLDETR.Q9QYC0	GsEENLDETR	-0.541353	0.0150505	0.0269717	Q9QYC0 1xPhospho [S586]	S586	0.122312	Add1
Q9QYC0	QkGsEENLDETR.Q9QYC0	QkGsEENLDETR	0.410526	0.0733881	0.107456	Q9QYC0 1xPhospho [S586]	S586	0.122312	Add1
Q9QYC0	GDDASEEGQNGSsPk.Q9QYC0	GDDASEEGQNGSsPk	0.303759	0.19246	0.248142	Q9QYC0 1xPhospho [S465]	S465	0.122312	Add1
Q9QYC0	AAVVTsPPPTTAPHk.Q9QYC0	AAVVTsPPPTTAPHk	0.774436	9.10218e-05	0.000333605	Q9QYC0 1xPhospho [S12]	S12	0.122312	Add1
Q9QYC0	SPPDQSAVPNtPPSTPVk.Q9QYC0	SPPDQSAVPNtPPSTPVk	-0.521805	0.0197431	0.0341335	Q9QYC0 1xPhospho [T610]	T610	0.122312	Add1
Q9QYC1	ASsFDSSR.Q9QYC1	ASsFDSSR	0.321805	0.166343	0.219398	Q9QYC1 1xPhospho [S574]	S574	-0.144321	Pcnx1
Q9QYR6	RTPsPk.Q9QYR6	RTPsPk	0.915789	3.36969e-06	2.35979e-05	Q9QYR6 1xPhospho [S2066]	S2066	1.8282	Map1a
Q9QYR6	QLsPESLGTLQFGELSLGkEEkGPLVk.Q9QYR6	QLsPESLGTLQFGELSLGkEEkGPLVk	0.559398	0.0115658	0.0214964	Q9QYR6 1xPhospho [S1205]	S1205	1.8282	Map1a
Q9QYR6	SPctPkEQQLHk.Q9QYR6	SPctPkEQQLHk	0.921805	4.04776e-06	2.66044e-05	Q9QYR6 1xPhospho [T1162]	T1162	1.8282	Map1a
Q9QYR6	TPsPkEAGR.Q9QYR6	TPsPkEAGR	0.745865	0.000242084	0.000774997	Q9QYR6 1xPhospho [S2066]	S2066	1.8282	Map1a
Q9QYR6	sPPcEDFSVTGESEk.Q9QYR6	sPPcEDFSVTGESEk	0.181955	0.440913	0.505343	Q9QYR6 1xPhospho [S908]	S908	1.8282	Map1a
Q9QYR6	EmTLDQksPEk.Q9QYR6	EmTLDQksPEk	0.384962	0.0946229	0.134125	Q9QYR6 1xPhospho [S1580]	S1580	1.8282	Map1a
Q9QYR6	ALGLEEsPEEEGk.Q9QYR6	ALGLEEsPEEEGk	0.864662	0	0	Q9QYR6 1xPhospho [S1606]	S1606	1.8282	Map1a
Q9QYR6	DRDITLQQDAYWkELscER.Q9QYR6	DRDITLQQDAYWkELscER	0.730827	0.000375653	0.00112314	Q9QYR6 1xPhospho [S1673]	S1673	1.8282	Map1a
Q9QYR6	DktPEEkDk.Q9QYR6	DktPEEkDk	0.845113	0	0	Q9QYR6 1xPhospho [T1472]	T1472	1.8282	Map1a
Q9QYR6	ELSSEPRtPPAQk.Q9QYR6	ELSSEPRtPPAQk	0.827068	2.24499e-06	1.72067e-05	Q9QYR6 1xPhospho [T504]	T504	1.8282	Map1a
Q9QYR6	ELSSAVsPPNLHSDTPTFSYASLAGPTIPPR.Q9QYR6	ELSSAVsPPNLHSDTPTFSYASLAGPTIPPR	0.135338	0.568108	0.626116	Q9QYR6 1xPhospho [S1993]	S1993	1.8282	Map1a
Q9QYR6	WLAEsPVGLPPEEEDkLTR.Q9QYR6	WLAEsPVGLPPEEEDkLTR	0.451128	0.0473768	0.0730043	Q9QYR6 1xPhospho [S1747]	S1747	1.8282	Map1a
Q9QYR6	YSEERESTFLDEGPNEQEItPLQHTPR.Q9QYR6	YSEERESTFLDEGPNEQEItPLQHTPR	-0.285714	0.221267	0.279614	Q9QYR6 1xPhospho [T1712]	T1712	1.8282	Map1a
Q9QYR6	QLsPESLGTLQFGELSLGk.Q9QYR6	QLsPESLGTLQFGELSLGk	0.933835	5.16599e-06	3.09302e-05	Q9QYR6 1xPhospho [S1205]	S1205	1.8282	Map1a
Q9QYR6	VPSAPGQEsPVPDTk.Q9QYR6	VPSAPGQEsPVPDTk	0.359398	0.12015	0.164655	Q9QYR6 1xPhospho [S1789]	S1789	1.8282	Map1a
Q9QYR6	NRAPDsGAEVER.Q9QYR6	NRAPDsGAEVER	0.46015	0.0427264	0.0670235	Q9QYR6 1xPhospho [S611]	S611	1.8282	Map1a
Q9QYR6	QEAtPRSPcTPkEQQLHk.Q9QYR6	QEAtPRSPcTPkEQQLHk	0.696241	0.000909209	0.00239571	Q9QYR6 2xPhospho [T1156; T/S]	T1156	1.8282	Map1a
Q9QYR6	QEATPRsPcTPk.Q9QYR6	QEATPRsPcTPk	0.409023	0.0745263	0.108919	Q9QYR6 1xPhospho [S1159]	S1159	1.8282	Map1a
Q9QYR6	SEPQDFQEDsWGDTk.Q9QYR6	SEPQDFQEDsWGDTk	0.882707	0	0	Q9QYR6 1xPhospho [S1023]	S1023	1.8282	Map1a
Q9QYR6	cLsPDDSTVk.Q9QYR6	cLsPDDSTVk	0.96391	6.52156e-06	3.38235e-05	Q9QYR6 1xPhospho [S981]	S981	1.8282	Map1a
Q9QYR6	ALGLEEsPEEEGkAR.Q9QYR6	ALGLEEsPEEEGkAR	0.933835	5.16599e-06	3.09302e-05	Q9QYR6 1xPhospho [S1606]	S1606	1.8282	Map1a
Q9QYR6	HRADskESLk.Q9QYR6	HRADskESLk	0.96391	6.52156e-06	3.38235e-05	Q9QYR6 1xPhospho [S319]	S319	1.8282	Map1a
Q9QYR6	AkPAsPAR.Q9QYR6	AkPAsPAR	0.72782	0.000408267	0.00120685	Q9QYR6 1xPhospho [S2591]	S2591	1.8282	Map1a
Q9QYR6	ADskESLk.Q9QYR6	ADskESLk	0.941353	5.69497e-06	3.22202e-05	Q9QYR6 1xPhospho [S319]	S319	1.8282	Map1a
Q9QYR6	AELEEmEEVHPsDEEEEETk.Q9QYR6	AELEEmEEVHPsDEEEEETk	0.708271	0.000679865	0.00185368	Q9QYR6 1xPhospho [S667]	S667	1.8282	Map1a
Q9QYR6	ALALVPGtPTR.Q9QYR6	ALALVPGtPTR	0.0406015	0.86618	0.886525	Q9QYR6 1xPhospho [T2182]	T2182	1.8282	Map1a
Q9QYR6	EAELtPENIAAAR.Q9QYR6	EAELtPENIAAAR	0.825564	3.01037e-06	2.15301e-05	Q9QYR6 1xPhospho [T633]	T633	1.8282	Map1a
Q9QYR6	GEPVPAWEGksPEQEVR.Q9QYR6	GEPVPAWEGksPEQEVR	0.929323	4.78536e-06	2.94763e-05	Q9QYR6 1xPhospho [S1648]	S1648	1.8282	Map1a
Q9QYR6	GEkELSSEPRtPPAQk.Q9QYR6	GEkELSSEPRtPPAQk	0.900752	1.39393e-06	1.1927e-05	Q9QYR6 1xPhospho [T504]	T504	1.8282	Map1a
Q9QYR6	ESTFLDEGPNEQEItPLQHTPR.Q9QYR6	ESTFLDEGPNEQEItPLQHTPR	-0.630075	0.00358436	0.0078165	Q9QYR6 1xPhospho [T1712]	T1712	1.8282	Map1a
Q9QYS2	EVLDSTTSsL.Q9QYS2	EVLDSTTSsL	0.299248	0.199406	0.255836	Q9QYS2 1xPhospho [S878]	S878	0.816361	Grm3
Q9QYX7	FmGSsLGSGLGTLGNTIR.Q9QYX7	FmGSsLGSGLGTLGNTIR	-0.299248	0.199406	0.255836	Q9QYX7 1xPhospho [S4187]	S4187	2.21799	Pclo
Q9QYX7	EHkENPELVDDLsPR.Q9QYX7	EHkENPELVDDLsPR	0.694737	0.00094183	0.00247336	Q9QYX7 1xPhospho [S1439]	S1439	2.21799	Pclo
Q9QYX7	ASPVPAPAEPPPQktPTAAHAk.Q9QYX7	ASPVPAPAEPPPQktPTAAHAk	0.381955	0.0973949	0.13764	Q9QYX7 1xPhospho [T1086]	T1086	2.21799	Pclo
Q9QYX7	SQEsEELVVAGGGGLR.Q9QYX7	SQEsEELVVAGGGGLR	-0.630075	0.00358436	0.0078165	Q9QYX7 1xPhospho [S1588]	S1588	2.21799	Pclo
Q9QYX7	IVDSGVQtDDEETADR.Q9QYX7	IVDSGVQtDDEETADR	-0.0842105	0.723889	0.770032	Q9QYX7 1xPhospho [T3376]	T3376	2.21799	Pclo
Q9QYX7	kIVDSGVQtDDEETADRTYASR.Q9QYX7	kIVDSGVQtDDEETADRTYASR	0.348872	0.132007	0.17913	Q9QYX7 1xPhospho [T3376]	T3376	2.21799	Pclo
Q9QYX7	kTQPQkVsPEQPQDQQk.Q9QYX7	kTQPQkVsPEQPQDQQk	0.912782	3.00375e-06	2.15301e-05	Q9QYX7 1xPhospho [S1378]	S1378	2.21799	Pclo
Q9QYX7	ENPELVDDLsPR.Q9QYX7	ENPELVDDLsPR	0.452632	0.0465754	0.0720052	Q9QYX7 1xPhospho [S1439]	S1439	2.21799	Pclo
Q9QYX7	VPPAsPk.Q9QYX7	VPPAsPk	0.944361	5.86982e-06	3.28069e-05	Q9QYX7 1xPhospho [S3598]	S3598	2.21799	Pclo
Q9QYX7	SSTsFDDDAGRR.Q9QYX7	SSTsFDDDAGRR	0.568421	0.0100891	0.019114	Q9QYX7 1xPhospho [S1553]	S1553	2.21799	Pclo
Q9QYX7	ELPSkQDsPkAPESk.Q9QYX7	ELPSkQDsPkAPESk	0.912782	3.00375e-06	2.15301e-05	Q9QYX7 1xPhospho [S636]	S636	2.21799	Pclo
Q9QYX7	mtPPPGPQYGVGSVLR.Q9QYX7	mtPPPGPQYGVGSVLR	0.458647	0.0434755	0.0678817	Q9QYX7 1xPhospho [T2998]	T2998	2.21799	Pclo
Q9QYX7	LPSPTSPLsPHSNk.Q9QYX7	LPSPTSPLsPHSNk	0.396992	0.0841221	0.121212	Q9QYX7 1xPhospho [S2495]	S2495	2.21799	Pclo
Q9QYX7	kIVDSGVQtDDEETADR.Q9QYX7	kIVDSGVQtDDEETADR	0.578947	0.00856506	0.016601	Q9QYX7 1xPhospho [T3376]	T3376	2.21799	Pclo
Q9QYX7	EHkENPELVDDLsPRR.Q9QYX7	EHkENPELVDDLsPRR	0.604511	0.00563412	0.0116494	Q9QYX7 1xPhospho [S1439]	S1439	2.21799	Pclo
Q9QYX7	SSSEGHLRsHGPSR.Q9QYX7	SSSEGHLRsHGPSR	0.843609	0	0	Q9QYX7 1xPhospho [S4820]	S4820	2.21799	Pclo
Q9QYX7	RHsWHDEDDETFDESPELk.Q9QYX7	RHsWHDEDDETFDESPELk	0.766917	0.000120519	0.000426438	Q9QYX7 1xPhospho [S1563]	S1563	2.21799	Pclo
Q9QYX7	TItPESR.Q9QYX7	TItPESR	0.571429	0.0096326	0.0183824	Q9QYX7 1xPhospho [T2186]	T2186	2.21799	Pclo
Q9QYX7	AksPGVDPk.Q9QYX7	AksPGVDPk	0.81203	1.31022e-05	6.26616e-05	Q9QYX7 1xPhospho [S4544]	S4544	2.21799	Pclo
Q9QYX7	kEHkENPELVDDLsPR.Q9QYX7	kEHkENPELVDDLsPR	0.631579	0.00348625	0.00764506	Q9QYX7 1xPhospho [S1439]	S1439	2.21799	Pclo
Q9QYX7	mSkFsPIQESR.Q9QYX7	mSkFsPIQESR	0.819549	6.73162e-06	3.38451e-05	Q9QYX7 1xPhospho [S4132]	S4132	2.21799	Pclo
Q9QYX7	ITQHFsTEEFEDEYVTDYTR.Q9QYX7	ITQHFsTEEFEDEYVTDYTR	-0.0451128	0.851188	0.872699	Q9QYX7 1xPhospho [S2072]	S2072	2.21799	Pclo
Q9QYX7	sPGVDPk.Q9QYX7	sPGVDPk	0.715789	0.000562121	0.00157649	Q9QYX7 1xPhospho [S4544]	S4544	2.21799	Pclo
Q9QYX7	RFsLNLGGIADAPk.Q9QYX7	RFsLNLGGIADAPk	0.888722	0	0	Q9QYX7 1xPhospho [S844]	S844	2.21799	Pclo
Q9QYX7	YNsLDLR.Q9QYX7	YNsLDLR	0.359398	0.12015	0.164655	Q9QYX7 1xPhospho [S3936]	S3936	2.21799	Pclo
Q9QYX7	FsLNLGGIADAPk.Q9QYX7	FsLNLGGIADAPk	0.518797	0.0205599	0.0354413	Q9QYX7 1xPhospho [S844]	S844	2.21799	Pclo
Q9QYX7	ADPTVQLAPsPPk.Q9QYX7	ADPTVQLAPsPPk	-0.0586466	0.806535	0.83824	Q9QYX7 1xPhospho [S3545]	S3545	2.21799	Pclo
Q9QYX7	AAAGPLPPISADTRDQFGSsHSLPEVQQHmR.Q9QYX7	AAAGPLPPISADTRDQFGSsHSLPEVQQHmR	-0.135338	0.568108	0.626116	Q9QYX7 2xPhospho [S4323; S]	S4323	2.21799	Pclo
Q9QYX7	ALGGELAAIPSsPQPTPk.Q9QYX7	ALGGELAAIPSsPQPTPk	0.774436	9.10218e-05	0.000333605	Q9QYX7 1xPhospho [S599]	S599	2.21799	Pclo
Q9QYX7	EQPGsPHSVSGEILGQEkPTYR.Q9QYX7	EQPGsPHSVSGEILGQEkPTYR	0.777444	8.08652e-05	0.000302987	Q9QYX7 1xPhospho [S2288]	S2288	2.21799	Pclo
Q9QYX7	AASVQPATASksPVPSQQASPk.Q9QYX7	AASVQPATASksPVPSQQASPk	0.141353	0.550819	0.611069	Q9QYX7 1xPhospho [S617]	S617	2.21799	Pclo
Q9QYX7	SQPTtPQETVTGk.Q9QYX7	SQPTtPQETVTGk	0.669173	0.00166035	0.00399877	Q9QYX7 1xPhospho [T860]	T860	2.21799	Pclo
Q9QYX7	AmPRPAsDSk.Q9QYX7	AmPRPAsDSk	0.935338	5.28234e-06	3.13082e-05	Q9QYX7 1xPhospho [S769]	S769	2.21799	Pclo
Q9QYX7	DSFSQESSPSsPSDLAk.Q9QYX7	DSFSQESSPSsPSDLAk	0.870677	0	0	Q9QYX7 1xPhospho [S1341]	S1341	2.21799	Pclo
Q9QYX7	FRETksQESEELVVAGGGGLR.Q9QYX7	FRETksQESEELVVAGGGGLR	0.590977	0.00706009	0.0140783	Q9QYX7 1xPhospho [S1585]	S1585	2.21799	Pclo
Q9QYX7	SEGITkPSLQQPsPk.Q9QYX7	SEGITkPSLQQPsPk	0.666165	0.00176841	0.00423733	Q9QYX7 1xPhospho [S212]	S212	2.21799	Pclo
Q9QYX7	DISIsEEEIkESQEk.Q9QYX7	DISIsEEEIkESQEk	0.822556	4.73313e-06	2.94763e-05	Q9QYX7 1xPhospho [S1400]	S1400	2.21799	Pclo
Q9QYX7	SLVSVLPEkkPsEEEk.Q9QYX7	SLVSVLPEkkPsEEEk	0.809023	1.62733e-05	7.46413e-05	Q9QYX7 1xPhospho [S1149]	S1149	2.21799	Pclo
Q9QYX7	SIsmEQLmk.Q9QYX7	SIsmEQLmk	0.306767	0.187923	0.242957	Q9QYX7 1xPhospho [S4706]	S4706	2.21799	Pclo
Q9QYX7	TQPQkVsPEQPQDQQk.Q9QYX7	TQPQkVsPEQPQDQQk	0.870677	0	0	Q9QYX7 1xPhospho [S1378]	S1378	2.21799	Pclo
Q9QYX7	SRtTDTFR.Q9QYX7	SRtTDTFR	-0.23609	0.314828	0.378534	Q9QYX7 1xPhospho [T112]	T112	2.21799	Pclo
Q9QZB7	AFsTEk.Q9QZB7	AFsTEk	-0.0857143	0.71911	0.765987	Q9QZB7 1xPhospho [S414]	S414	-0.0178504	Actr10
Q9QZK2	RFsSDAR.Q9QZK2	RFsSDAR	0.503759	0.0250626	0.0422437	Q9QZK2 1xPhospho [S378]	S378	0.755267	Bcar3
Q9QZK2	TGsEPTLSPALVR.Q9QZK2	TGsEPTLSPALVR	-0.132331	0.576843	0.634851	Q9QZK2 1xPhospho [S365]	S365	0.755267	Bcar3
Q9QZK2	RLsLTTGSSIQAR.Q9QZK2	RLsLTTGSSIQAR	0.201504	0.39256	0.458865	Q9QZK2 1xPhospho [S284]	S284	0.755267	Bcar3
[truncated: 110 more rows]

## Sheet: decorrelated_features
decorrelated peptides (protein up, phosphopeptide down)
disease	no_of_decor	protein
Developmental Delay	0
Epilepsy	0
ADHD	0
Major Depressive Disorder	2	Q61290,Q9QYX7
Multiple Sclerosis	1	Q60902
Parkinsons Disease	0
Alzheimer's	0
Glioma	0
Bipolar Disorder	0
Autism Spectrum Disorders	6	Q3UHD9,Q61037,Q61290,Q62108,Q99NE5,Q9QYR6
Schizophrenia	0
decorrelated peptides (protein down, phosphopeptide up)
disease	no_of_decor	protein
Developmental Delay	1	P33173
Epilepsy	0
ADHD	0
Major Depressive Disorder	0
Multiple Sclerosis	1	Q63844
Parkinsons Disease	0
Alzheimer's	0
Glioma	0
Bipolar Disorder	0
Autism Spectrum Disorders	2	O35927,Q6ZQ08
Schizophrenia	3	Q63844,Q6ZQ08,Q8BTG7

## Sheet: decor.pep_in_disease
disease	protein	pep.prot	pep	corr	pvalue	p_adjust	log2FC(adult/neonate)	Modifications.in.Master.Proteins	Gene names	mouse_residue	human_residue	Protein names	Gene ontology (biological process)	Gene ontology (cellular component)	Gene ontology (molecular function)
ASD	O35927	SLsQSQGDPLPPAHTGTFR.O35927	SLsQSQGDPLPPAHTGTFR	-0.484211	0.032064	0.0525028	-0.186628	O35927 1xPhospho [S435]	Ctnnd2 Catnd2 Nprap	S435	S438	Catenin delta-2 (Neural plakophilin-related ARM-repeat protein) (NPRAP) (Neurojungin)	cell-cell adhesion [GO:0098609]; cell-cell junction assembly [GO:0007043]; dendritic spine morphogenesis [GO:0060997]; learning [GO:0007612]; morphogenesis of a branching structure [GO:0001763]; regulation of canonical Wnt signaling pathway [GO:0060828]; regulation of synaptic plasticity [GO:0048167]; synapse organization [GO:0050808]	adherens junction [GO:0005912]; cytoplasm [GO:0005737]; dendrite [GO:0030425]; neuron projection [GO:0043005]; nucleus [GO:0005634]; perikaryon [GO:0043204]; plasma membrane [GO:0005886]; postsynaptic density [GO:0014069]	beta-catenin binding [GO:0008013]; cadherin binding [GO:0045296]
DD	P33173	SGTsQEELR.P33173	SGTsQEELR	-0.577444	0.0087704	0.0169292	-0.344762	P33173 1xPhospho [S937]	Kif1a Atsv Kif1	S937	S937	Kinesin-like protein KIF1A (Axonal transporter of synaptic vesicles)	anterograde axonal transport [GO:0008089]; anterograde neuronal dense core vesicle transport [GO:1990048]; cytoskeleton-dependent intracellular transport [GO:0030705]; dense core granule cytoskeletal transport [GO:0099519]; interkinetic nuclear migration [GO:0022027]; microtubule-based movement [GO:0007018]; protein transport along microtubule [GO:0098840]; regulation of dendritic spine developme…	axon [GO:0030424]; axon cytoplasm [GO:1904115]; cytosol [GO:0005829]; dendrite [GO:0030425]; extrinsic component of neuronal dense core vesicle membrane [GO:0098674]; kinesin complex [GO:0005871]; microtubule [GO:0005874]; neuronal cell body [GO:0043025]; neuronal dense core vesicle [GO:0098992]; neuron projection [GO:0043005]; perinuclear region of cytoplasm [GO:0048471]; postsynapse [GO:0098794…	ATP binding [GO:0005524]; ATP-dependent microtubule motor activity, plus-end-directed [GO:0008574]; identical protein binding [GO:0042802]; microtubule binding [GO:0008017]; microtubule motor activity [GO:0003777]
ASD	Q3UHD9	AEAAAVAGLSTPGsLHR.Q3UHD9	AEAAAVAGLSTPGsLHR	-0.500752	0.0260515	0.0435983	0.772194	Q3UHD9 1xPhospho [S632]	Agap2 Centg1 Kiaa0167	S632	S638	Arf-GAP with GTPase, ANK repeat and PH domain-containing protein 2 (AGAP-2) (Centaurin-gamma-1) (Cnt-g1) (Phosphatidylinositol 3-kinase enhancer) (PIKE)	actin cytoskeleton organization [GO:0030036]; endosomal transport [GO:0016197]; mammary gland alveolus development [GO:0060749]; negative regulation of apoptotic process [GO:0043066]; negative regulation of extrinsic apoptotic signaling pathway in absence of ligand [GO:2001240]; negative regulation of neuron apoptotic process [GO:0043524]; negative regulation of protein catabolic process [GO:0042…	cytoplasm [GO:0005737]; cytosol [GO:0005829]; endosome [GO:0005768]; Flemming body [GO:0090543]; nucleoplasm [GO:0005654]; nucleus [GO:0005634]	ATP binding [GO:0005524]; GTPase activator activity [GO:0005096]; GTPase activity [GO:0003924]; GTP binding [GO:0005525]; metal ion binding [GO:0046872]; phosphatidylinositol 3-kinase regulator activity [GO:0035014]; protein kinase activator activity [GO:0030295]; protein kinase binding [GO:0019901]
MS	Q60902	GIDPPQVLsPDmVPPSER.Q60902	GIDPPQVLsPDmVPPSER	-0.532331	0.0170885	0.0300517	0.882643	Q60902 1xPhospho [S353]	Eps15l1 Eps15-rs Eps15R	S353	S355	Epidermal growth factor receptor substrate 15-like 1 (Epidermal growth factor receptor pathway substrate 15-related sequence) (Eps15-rs) (Eps15-related protein) (Eps15R)	endocytosis [GO:0006897]; endosomal transport [GO:0016197]	clathrin coat of coated pit [GO:0030132]; nucleus [GO:0005634]	calcium ion binding [GO:0005509]
ASD	Q61037	kASGPLsPPTGPPSPVPmGPAVR.Q61037	kASGPLsPPTGPPSPVPmGPAVR	-0.569925	0.00985866	0.0187833	0.212307	Q61037 1xPhospho [S664]	Tsc2	S664	S664	Tuberin (Tuberous sclerosis 2 protein homolog)	aging [GO:0007568]; anoikis [GO:0043276]; cell projection organization [GO:0030030]; cellular response to insulin stimulus [GO:0032869]; establishment of cell polarity [GO:0030010]; establishment of protein localization [GO:0045184]; glucose import [GO:0046323]; heart development [GO:0007507]; insulin-like growth factor receptor signaling pathway [GO:0048009]; negative regulation of axonogenesis …	caveola [GO:0005901]; cell projection [GO:0042995]; cytoplasm [GO:0005737]; cytoskeleton [GO:0005856]; cytosol [GO:0005829]; dendrite [GO:0030425]; glutamatergic synapse [GO:0098978]; growth cone [GO:0030426]; intracellular membrane-bounded organelle [GO:0043231]; lysosome [GO:0005764]; membrane [GO:0016020]; membrane raft [GO:0045121]; neuronal cell body [GO:0043025]; neuron projection [GO:00430…	14-3-3 protein binding [GO:0071889]; GTPase activator activity [GO:0005096]; Hsp90 protein binding [GO:0051879]; phosphatase binding [GO:0019902]; protein-containing complex binding [GO:0044877]; protein homodimerization activity [GO:0042803]; protein N-terminus binding [GO:0047485]; small GTPase binding [GO:0031267]
MDD	Q61290	SFsTIR.Q61290	SFsTIR	-0.545865	0.0141083	0.0254577	0.950962	Q61290 1xPhospho [S1982]	Cacna1e Cach6 Cacnl1a6 Cchra1	S1982	site not annotated in PSP	Voltage-dependent R-type calcium channel subunit alpha-1E (Brain calcium channel II) (BII) (Calcium channel, L type, alpha-1 polypeptide, isoform 6) (Voltage-gated calcium channel subunit alpha Cav2.3)	behavioral fear response [GO:0001662]; behavioral response to pain [GO:0048266]; calcium ion import [GO:0070509]; calcium ion transmembrane transport [GO:0070588]; calcium ion transport [GO:0006816]; chemical synaptic transmission [GO:0007268]; fear response [GO:0042596]; flagellated sperm motility [GO:0030317]; glucose homeostasis [GO:0042593]; locomotory behavior [GO:0007626]; nervous system pr…	GABA-ergic synapse [GO:0098982]; integral component of postsynaptic membrane [GO:0099055]; integral component of presynaptic membrane [GO:0099056]; perikaryon [GO:0043204]; voltage-gated calcium channel complex [GO:0005891]	calcium ion binding [GO:0005509]; protein N-terminus binding [GO:0047485]; voltage-gated calcium channel activity [GO:0005245]; voltage-gated calcium channel activity involved in regulation of presynaptic cytosolic calcium levels [GO:0099626]; voltage-gated cation channel activity [GO:0022843]
ASD	Q62108	RYsPVAkDLLGEEDIPREPR.Q62108	RYsPVAkDLLGEEDIPREPR	-0.434586	0.0569223	0.0855289	1.56911	Q62108 1xPhospho [S295]	Dlg4 Dlgh4 Psd95	S295	S295	Disks large homolog 4 (Postsynaptic density protein 95) (PSD-95) (Synapse-associated protein 90) (SAP-90) (SAP90)	AMPA glutamate receptor clustering [GO:0097113]; cell-cell adhesion [GO:0098609]; cellular response to potassium ion [GO:0035865]; chemical synaptic transmission [GO:0007268]; dendritic spine morphogenesis [GO:0060997]; dendritic spine organization [GO:0097061]; establishment of protein localization [GO:0045184]; locomotory behavior [GO:0007626]; locomotory exploration behavior [GO:0035641]; nega…	AMPA glutamate receptor complex [GO:0032281]; anchored component of postsynaptic density membrane [GO:0099031]; cell-cell junction [GO:0005911]; cell junction [GO:0030054]; cell periphery [GO:0071944]; cerebellar mossy fiber [GO:0044300]; cortical cytoskeleton [GO:0030863]; cytoplasm [GO:0005737]; dendrite [GO:0030425]; dendrite cytoplasm [GO:0032839]; dendritic spine [GO:0043197]; endoplasmic re…	acetylcholine receptor binding [GO:0033130]; beta-1 adrenergic receptor binding [GO:0031697]; beta-2 adrenergic receptor binding [GO:0031698]; D1 dopamine receptor binding [GO:0031748]; frizzled binding [GO:0005109]; glutamate receptor binding [GO:0035254]; immunoglobulin binding [GO:0019865]; ionotropic glutamate receptor binding [GO:0035255]; kinase binding [GO:0019900]; kinesin binding [GO:001…
ASD	Q62108	EQLmNSsLGSGTASLR.Q62108	EQLmNSsLGSGTASLR	-0.490226	0.0297617	0.0490745	1.56911	Q62108 1xPhospho [S415]	Dlg4 Dlgh4 Psd95	S415	S415	Disks large homolog 4 (Postsynaptic density protein 95) (PSD-95) (Synapse-associated protein 90) (SAP-90) (SAP90)	AMPA glutamate receptor clustering [GO:0097113]; cell-cell adhesion [GO:0098609]; cellular response to potassium ion [GO:0035865]; chemical synaptic transmission [GO:0007268]; dendritic spine morphogenesis [GO:0060997]; dendritic spine organization [GO:0097061]; establishment of protein localization [GO:0045184]; locomotory behavior [GO:0007626]; locomotory exploration behavior [GO:0035641]; nega…	AMPA glutamate receptor complex [GO:0032281]; anchored component of postsynaptic density membrane [GO:0099031]; cell-cell junction [GO:0005911]; cell junction [GO:0030054]; cell periphery [GO:0071944]; cerebellar mossy fiber [GO:0044300]; cortical cytoskeleton [GO:0030863]; cytoplasm [GO:0005737]; dendrite [GO:0030425]; dendrite cytoplasm [GO:0032839]; dendritic spine [GO:0043197]; endoplasmic re…	acetylcholine receptor binding [GO:0033130]; beta-1 adrenergic receptor binding [GO:0031697]; beta-2 adrenergic receptor binding [GO:0031698]; D1 dopamine receptor binding [GO:0031748]; frizzled binding [GO:0005109]; glutamate receptor binding [GO:0035254]; immunoglobulin binding [GO:0019865]; ionotropic glutamate receptor binding [GO:0035255]; kinase binding [GO:0019900]; kinesin binding [GO:001…
MS	Q63844	IADPEHDHTGFLTEyVATR.Q63844	IADPEHDHTGFLTEyVATR	-0.491729	0.0292073	0.0482617	-0.534693	Q63844 1xPhospho [Y205]	Mapk3 Erk1 Prkm3	Y205	Y204	Mitogen-activated protein kinase 3 (MAP kinase 3) (MAPK 3) (EC 2.7.11.24) (ERT2) (Extracellular signal-regulated kinase 1) (ERK-1) (Insulin-stimulated MAP2 kinase) (MAP kinase isoform p44) (p44-MAPK) (MNK1) (Microtubule-associated protein 2 kinase) (p44-ERK1)	aging [GO:0007568]; animal organ morphogenesis [GO:0009887]; apoptotic process [GO:0006915]; arachidonic acid metabolic process [GO:0019369]; Bergmann glial cell differentiation [GO:0060020]; BMP signaling pathway [GO:0030509]; cardiac neural crest cell development involved in heart development [GO:0061308]; cartilage development [GO:0051216]; caveolin-mediated endocytosis [GO:0072584]; cell cycl…	caveola [GO:0005901]; cytoplasm [GO:0005737]; cytoskeleton [GO:0005856]; cytosol [GO:0005829]; early endosome [GO:0005769]; focal adhesion [GO:0005925]; Golgi apparatus [GO:0005794]; late endosome [GO:0005770]; mitochondrion [GO:0005739]; nuclear envelope [GO:0005635]; nucleoplasm [GO:0005654]; nucleus [GO:0005634]; plasma membrane [GO:0005886]; protein-containing complex [GO:0032991]; pseudopodi…	ATP binding [GO:0005524]; identical protein binding [GO:0042802]; MAP kinase activity [GO:0004707]; MAP kinase kinase activity [GO:0004708]; phosphatase binding [GO:0019902]; phosphotyrosine residue binding [GO:0001784]; protein kinase activity [GO:0004672]; protein serine/threonine kinase activity [GO:0004674]; protein serine kinase activity [GO:0106310]; protein threonine kinase activity [GO:01…
Scz, ASD	Q6ZQ08	TAsPQQR.Q6ZQ08	TAsPQQR	-0.437594	0.0550843	0.0832991	-0.4177	Q6ZQ08 1xPhospho [S1480]	Cnot1 Kiaa1007	S1480	site not annotated in PSP	CCR4-NOT transcription complex subunit 1 (CCR4-associated factor 1)	gene silencing by miRNA [GO:0035195]; negative regulation of intracellular estrogen receptor signaling pathway [GO:0033147]; negative regulation of retinoic acid receptor signaling pathway [GO:0048387]; negative regulation of transcription by RNA polymerase II [GO:0000122]; negative regulation of translation [GO:0017148]; nuclear-transcribed mRNA catabolic process, deadenylation-dependent decay […	CCR4-NOT complex [GO:0030014]; CCR4-NOT core complex [GO:0030015]; cytosol [GO:0005829]; nucleus [GO:0005634]; P-body [GO:0000932]	armadillo repeat domain binding [GO:0070016]; estrogen receptor binding [GO:0030331]; molecular adaptor activity [GO:0060090]; poly(A)-specific ribonuclease activity [GO:0004535]; protein domain specific binding [GO:0019904]; retinoic acid receptor binding [GO:0042974]
Scz	Q8BTG7	RLsGGAVPSASmTR.Q8BTG7	RLsGGAVPSASmTR	-0.445113	0.0506908	0.0773511	-0.540108	Q8BTG7 1xPhospho [S298]	Ndrg4 Kiaa1180 Ndr4	S298	S298	Protein NDRG4 (N-myc downstream-regulated gene 4 protein) (Protein Ndr4)	brain development [GO:0007420]; cell migration involved in heart development [GO:0060973]; negative regulation of platelet-derived growth factor receptor signaling pathway [GO:0010642]; negative regulation of smooth muscle cell migration [GO:0014912]; negative regulation of smooth muscle cell proliferation [GO:0048662]; positive regulation of ERK1 and ERK2 cascade [GO:0070374]; positive regulatio…	basolateral plasma membrane [GO:0016323]; cell projection membrane [GO:0031253]; cytoplasm [GO:0005737]; cytosol [GO:0005829]; endoplasmic reticulum membrane [GO:0005789]; mitochondrion [GO:0005739]	NA
ASD	Q99NE5	STSVSGEIYTLEHNDGSQsDTAVGTVGAGGk.Q99NE5	STSVSGEIYTLEHNDGSQsDTAVGTVGAGGk	-0.651128	0.00239933	0.00554036	1.10274	Q99NE5 1xPhospho [S1187]	Rims1 Kiaa0340 Rab3ip1 Rim1	S1187	S1416	Regulating synaptic membrane exocytosis protein 1 (Rab-3-interacting molecule 1) (RIM 1) (Rab-3-interacting protein 1)	acrosomal vesicle exocytosis [GO:0060478]; calcium ion-regulated exocytosis of neurotransmitter [GO:0048791]; cell differentiation [GO:0030154]; intracellular protein transport [GO:0006886]; long-term synaptic potentiation [GO:0060291]; neurotransmitter secretion [GO:0007269]; positive regulation of dendrite extension [GO:1903861]; positive regulation of excitatory postsynaptic potential [GO:2000…	cell projection [GO:0042995]; cytoskeleton of presynaptic active zone [GO:0048788]; GABA-ergic synapse [GO:0098982]; glutamatergic synapse [GO:0098978]; inhibitory synapse [GO:0060077]; plasma membrane [GO:0005886]; postsynaptic density [GO:0014069]; presynaptic active zone cytoplasmic component [GO:0098831]; presynaptic membrane [GO:0042734]; synapse [GO:0045202]; vesicle [GO:0031982]	metal ion binding [GO:0046872]; protein kinase binding [GO:0019901]; SH3 domain binding [GO:0017124]; small GTPase binding [GO:0031267]; structural constituent of presynaptic active zone [GO:0098882]; transmembrane transporter binding [GO:0044325]
ASD	Q99NE5	GRWsPSLAR.Q99NE5	GRWsPSLAR	-0.526316	0.0185674	0.0323144	1.10274	Q99NE5 1xPhospho [S908]	Rims1 Kiaa0340 Rab3ip1 Rim1	S908	S1137	Regulating synaptic membrane exocytosis protein 1 (Rab-3-interacting molecule 1) (RIM 1) (Rab-3-interacting protein 1)	acrosomal vesicle exocytosis [GO:0060478]; calcium ion-regulated exocytosis of neurotransmitter [GO:0048791]; cell differentiation [GO:0030154]; intracellular protein transport [GO:0006886]; long-term synaptic potentiation [GO:0060291]; neurotransmitter secretion [GO:0007269]; positive regulation of dendrite extension [GO:1903861]; positive regulation of excitatory postsynaptic potential [GO:2000…	cell projection [GO:0042995]; cytoskeleton of presynaptic active zone [GO:0048788]; GABA-ergic synapse [GO:0098982]; glutamatergic synapse [GO:0098978]; inhibitory synapse [GO:0060077]; plasma membrane [GO:0005886]; postsynaptic density [GO:0014069]; presynaptic active zone cytoplasmic component [GO:0098831]; presynaptic membrane [GO:0042734]; synapse [GO:0045202]; vesicle [GO:0031982]	metal ion binding [GO:0046872]; protein kinase binding [GO:0019901]; SH3 domain binding [GO:0017124]; small GTPase binding [GO:0031267]; structural constituent of presynaptic active zone [GO:0098882]; transmembrane transporter binding [GO:0044325]
ASD	Q9QYR6	ESTFLDEGPNEQEItPLQHTPR.Q9QYR6	ESTFLDEGPNEQEItPLQHTPR	-0.630075	0.00358436	0.0078165	1.8282	Q9QYR6 1xPhospho [T1712]	Map1a Mtap1 Mtap1a	T1712	V1740	Microtubule-associated protein 1A (MAP-1A) [Cleaved into: MAP1A heavy chain; MAP1 light chain LC2]	anterograde axonal protein transport [GO:0099641]; associative learning [GO:0008306]; axonogenesis [GO:0007409]; dendrite development [GO:0016358]; memory [GO:0007613]; microtubule cytoskeleton organization [GO:0000226]; negative regulation of microtubule depolymerization [GO:0007026]; negative regulation of proteasomal ubiquitin-dependent protein catabolic process [GO:0032435]; negative regulati…	axon [GO:0030424]; axon cytoplasm [GO:1904115]; axon initial segment [GO:0043194]; cytoplasm [GO:0005737]; cytosol [GO:0005829]; dendrite [GO:0030425]; dendritic branch [GO:0044307]; dendritic microtubule [GO:1901588]; dendritic shaft [GO:0043198]; microtubule [GO:0005874]; microtubule associated complex [GO:0005875]; neuronal cell body [GO:0043025]; neuron projection [GO:0043005]; photoreceptor …	actin binding [GO:0003779]; collagen binding [GO:0005518]; cytoskeletal anchor activity [GO:0008093]; ionotropic glutamate receptor binding [GO:0035255]; microtubule binding [GO:0008017]; tubulin binding [GO:0015631]
MDD	Q9QYX7	SQEsEELVVAGGGGLR.Q9QYX7	SQEsEELVVAGGGGLR	-0.630075	0.00358436	0.0078165	2.21799	Q9QYX7 1xPhospho [S1588]	Pclo Acz	S1588	S1584	Protein piccolo (Aczonin) (Brain-derived HLMN protein) (Multidomain presynaptic cytomatrix protein)	cAMP-mediated signaling [GO:0019933]; cytoskeleton organization [GO:0007010]; insulin secretion [GO:0030073]; maintenance of presynaptic active zone structure [GO:0048790]; modulation of excitatory postsynaptic potential [GO:0098815]; positive regulation of synaptic vesicle recycling [GO:1903423]; presynapse to nucleus signaling pathway [GO:0099526]; presynaptic active zone assembly [GO:1904071];…	axon [GO:0030424]; cone cell pedicle [GO:0044316]; cytoskeleton of presynaptic active zone [GO:0048788]; dendrite [GO:0030425]; GABA-ergic synapse [GO:0098982]; glutamatergic synapse [GO:0098978]; Golgi-associated vesicle [GO:0005798]; growth cone [GO:0030426]; inhibitory synapse [GO:0060077]; neuromuscular junction [GO:0031594]; neuronal cell body [GO:0043025]; neuron projection [GO:0043005]; pa…	calcium-dependent phospholipid binding [GO:0005544]; calcium ion binding [GO:0005509]; profilin binding [GO:0005522]; structural constituent of presynaptic active zone [GO:0098882]; transcription corepressor binding [GO:0001222]
