# Supplementary figures and images for: Dynamic proteomic and phosphoproteomic atlas of corticostriatal axons in neurodevelopment
Source: eLife journal article supplement (doi:10.7554/elife.78847), 2022-10-14

Figure 1b

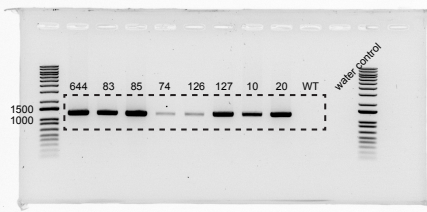

Figure 1c

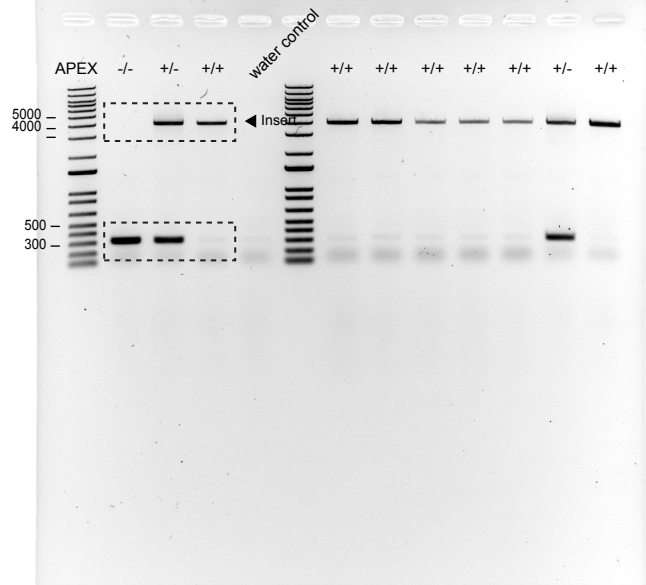

Figure 1e

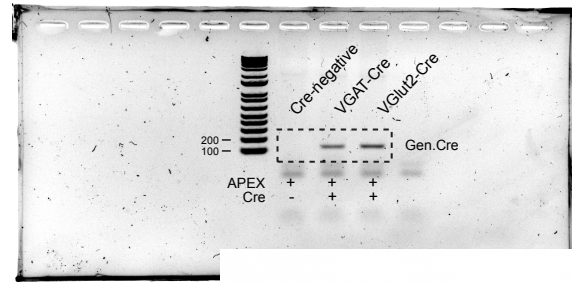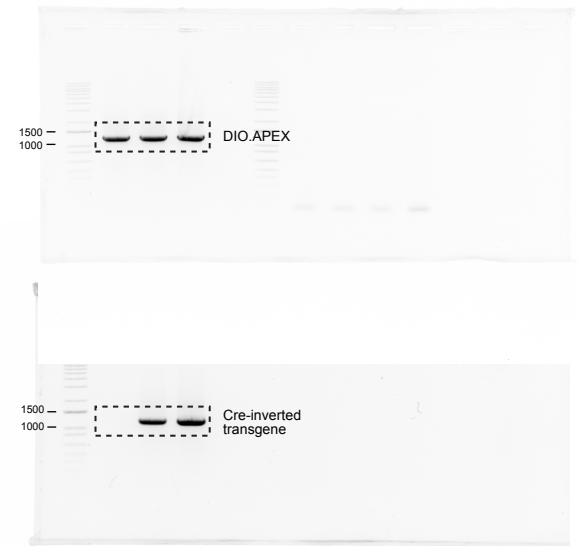

Figure 1d

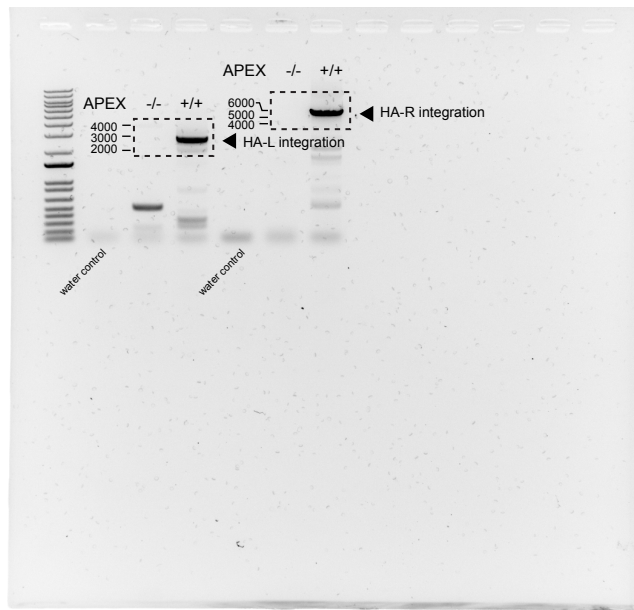

Supplement: fig1-data1 [file Figure1_source_data1.pdf › Figure1-source data 1/Figure1_source_data1.pdf]

Figure 1 - Figure supplement 2a

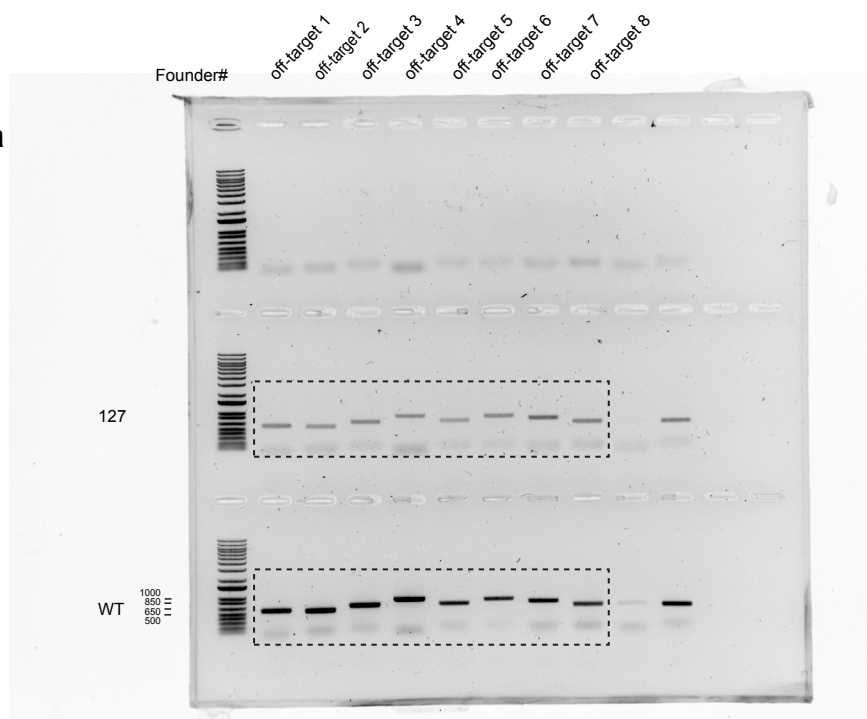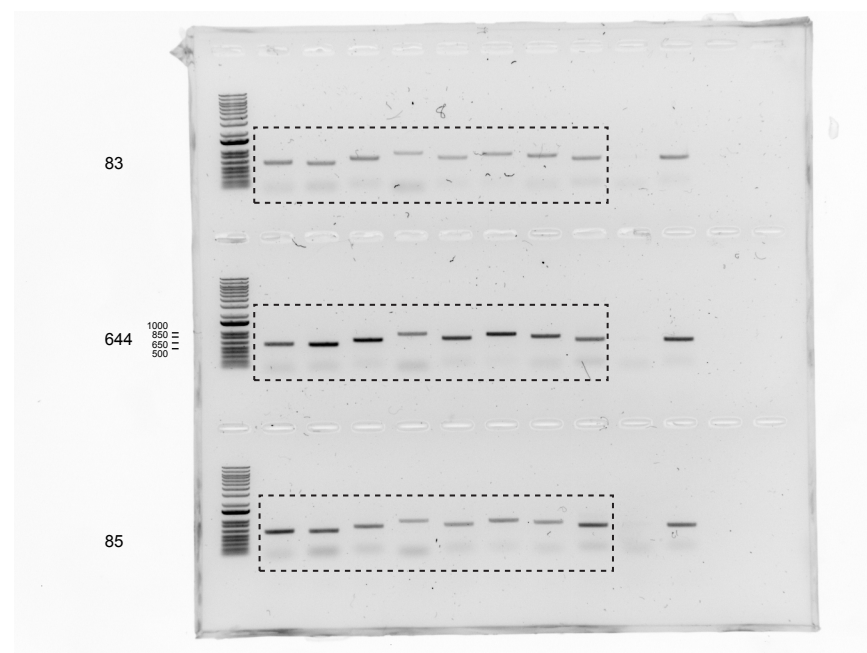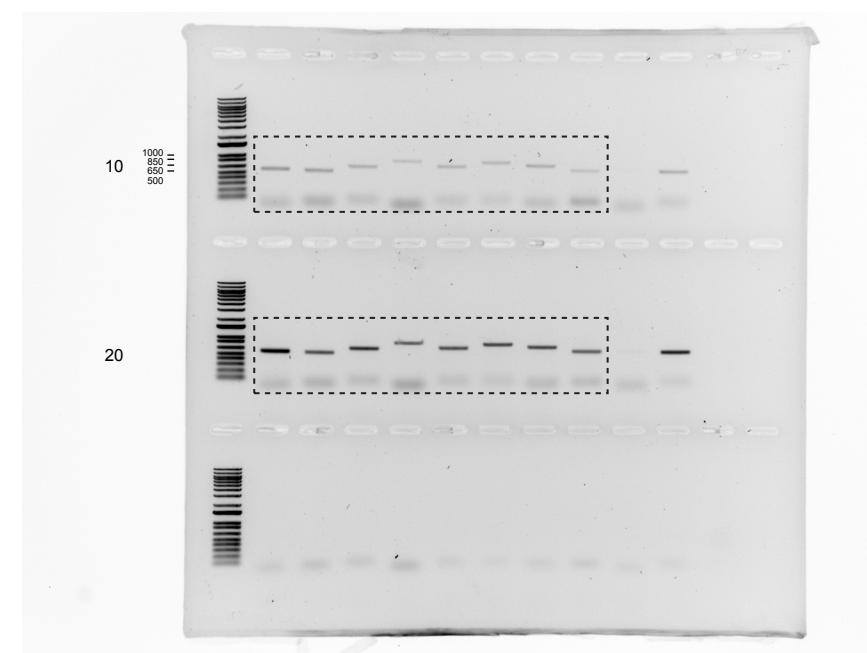

Supplement: fig1-figsupp1-data1 [file elife-78847-fig1-figsupp1-data1-v2.zip]

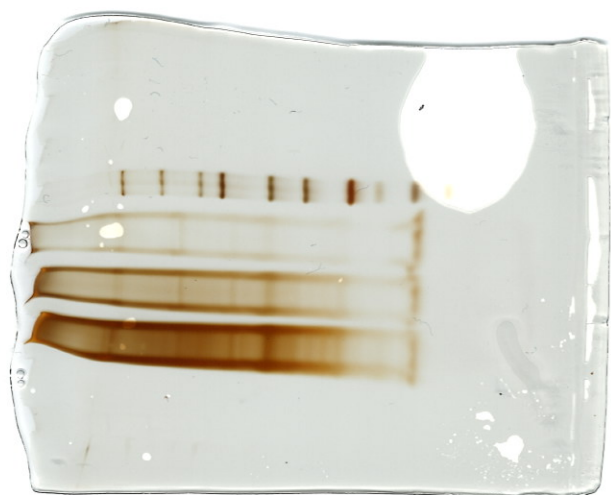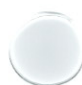

Supplement: fig2-data1 [file elife-78847-fig2-data1-v2.zip]

Figure 2c

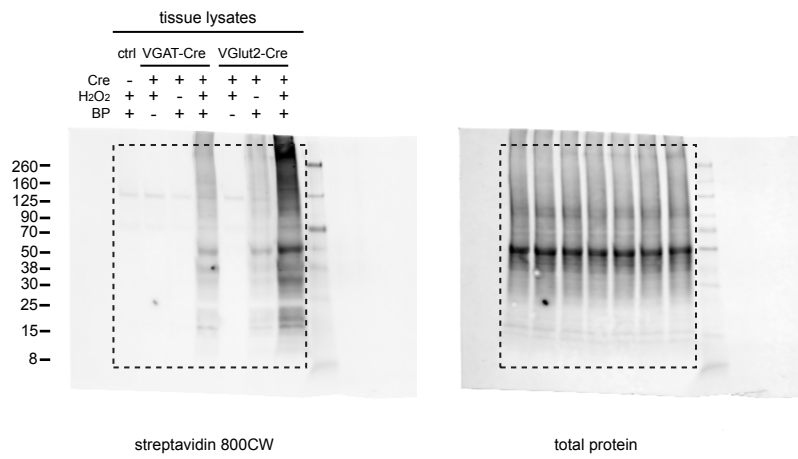

Figure 2d

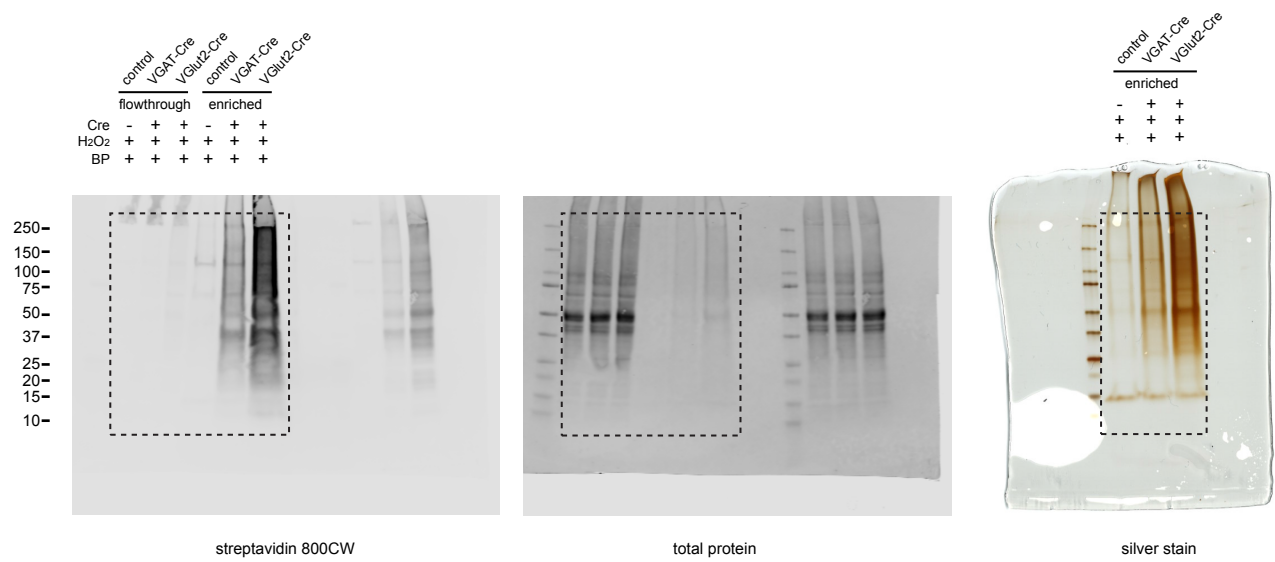

Supplement: fig2-data1 [file elife-78847-fig2-data1-v2.zip]

Figure 3 - figure supplement 1a

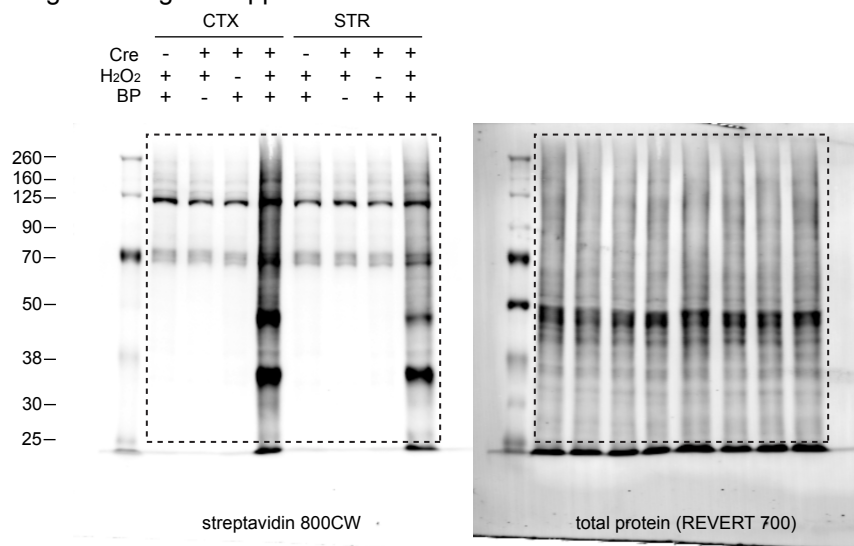

Figure 3b, and Figure 3 - figure supplement 1e

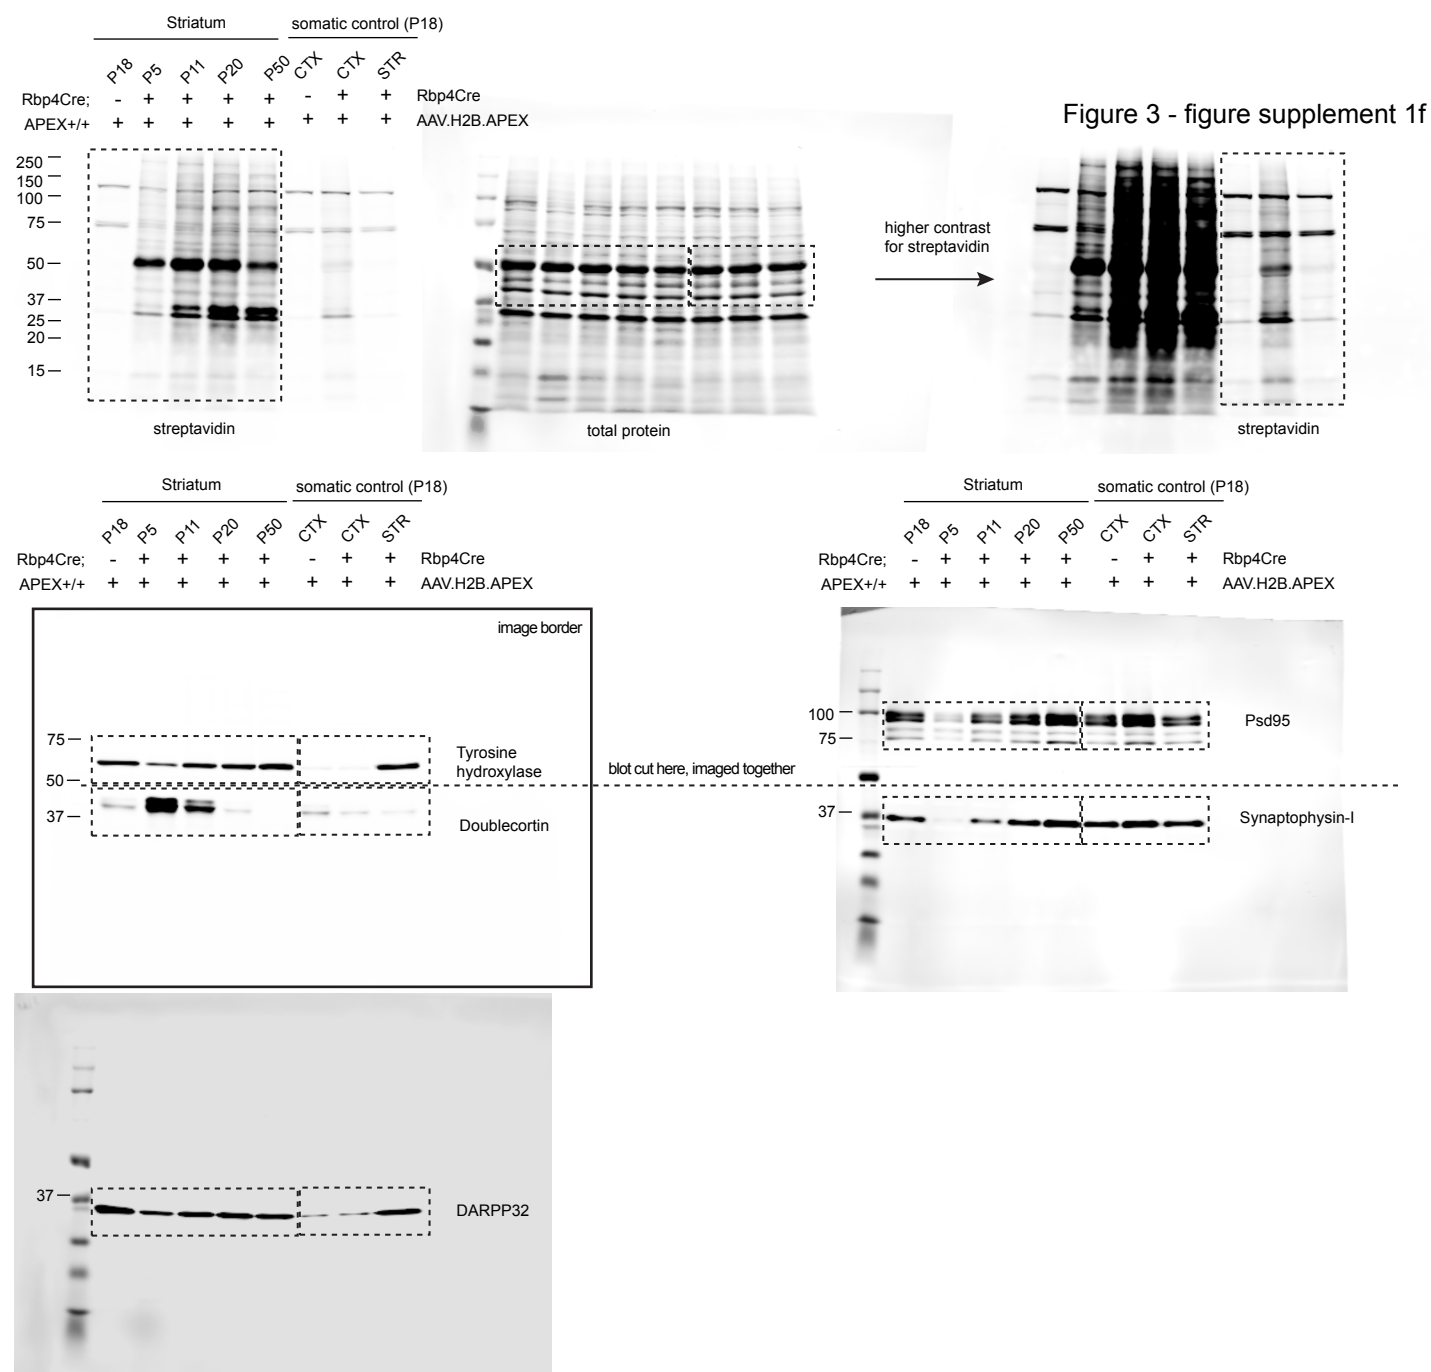

Supplement: fig3-figsupp1-data1 [file elife-78847-fig3-figsupp1-data1-v2.zip]
